# Supplementary material for: Machine Learning Classifies Core and Outer Fucosylation of N-Glycoproteins Using Mass Spectrometry
Source: PubMed Central journal article supplement (PMC6962204; doi:10.1038/s41598-019-57274-1), 2020-01-15
Supplement: 41598_2019_57274_MOESM1_ESM.pdf [file 41598_2019_57274_MOESM1_ESM.pdf]

**Supplementary information for:**

**Machine Learning Classifies Core and Outer Fucosylation of N-Glycoproteins Using Mass Spectrometry**

Heeyoun Hwang<sup>1,\*</sup>, Hoi Keun Jeong<sup>1,2,\*</sup>, Hyun Kyoung Lee<sup>1,2</sup>, Gun Wook Park<sup>1</sup>, Ju Yeon Lee<sup>1</sup>,  
Soo Youn Lee<sup>1</sup>, Young-Mook Kang<sup>3</sup>, Hyun Joo An<sup>2,4</sup>, Jeong Gu Kang<sup>5</sup>, Jeong-Heon Ko<sup>5,6</sup>,  
Jin Young Kim<sup>1,\*\*</sup>, and Jong Shin Yoo<sup>1,2,\*\*</sup>

<sup>1</sup>*Research Center for Bioconvergence Analysis, Korea Basic Science Institute, Cheongju, Republic of Korea, 28119*

<sup>2</sup>*Graduate School of Analytical Science and Technology, Chungnam National University, Daejeon, Republic of Korea, 34134*

<sup>3</sup>*Drug Information Platform Center, Korea Research Institute of Chemical Technology, Daejeon, Korea, 34114*

<sup>4</sup>*Asia Glycomics Reference Site, Chungnam National University, Daejeon, Republic of Korea, 34134*

<sup>5</sup>*Genome Editing Research Center, Korea Research Institute of Bioscience and Biotechnology, Daejeon, Republic of Korea, 34141*

<sup>6</sup>*Department of Biomolecular Science, Korea University of Science and Technology (UST), Daejeon, Republic of Korea, 34113*

\* These authors contributed equally.

\*\* Corresponding Authors. Email: [jongshin@kbsi.re.kr](mailto:jongshin@kbsi.re.kr); Tel. +82-43-240-5150  
Email: [jingyoung@kbsi.re.kr](mailto:jingyoung@kbsi.re.kr); Tel. +82-43-240-5142

## Contents

### (1) List of supplementary tables:

|                                                                                                                                                                                                                                                          |     |
|----------------------------------------------------------------------------------------------------------------------------------------------------------------------------------------------------------------------------------------------------------|-----|
| <b>Supplementary Table 1</b> Glycopeptide spectrum matches of alpha-1-acid glycoprotein and immunoglobulin gamma, and their relative intensities as training set for machine learning....4                                                               | 4   |
| <b>Supplementary Table 2</b> Glycopeptide spectrum matches of alpha-1-acid glycoprotein and immunoglobulin gamma, and their relative intensities as test set for machine learning.....21                                                                 | 21  |
| <b>Supplementary Table 3</b> Glycopeptide spectrum matches of human plasma proteins and their relative intensities as unknown set for machine learning.....37                                                                                            | 37  |
| <b>Supplementary Table 4</b> Models generated by deep neural network for fucosylation classification.....63                                                                                                                                              | 63  |
| <b>Supplementary Table 5</b> Models generated by support vector machine for fucosylation classification.....87                                                                                                                                           | 87  |
| <b>Supplementary Table 6</b> Glycopeptide spectrum matches of alpha-1-acid glycoprotein and immunoglobulin gamma, and their Classification as training set for machine learning.....107                                                                  | 107 |
| <b>Supplementary Table 7</b> Glycopeptide spectrum matches of alpha-1-acid glycoprotein and immunoglobulin gamma, and their Classification as test set for machine learning.....122                                                                      | 122 |
| <b>Supplementary Table 8</b> Glycopeptide spectrum matches of human plasma proteins and their Classification as unknown set for machine learning.....136                                                                                                 | 136 |
| <b>Supplementary Table 9</b> N-glycopeptide having both core and outer type fucosylation in human plasma.....159                                                                                                                                         | 159 |
| <b>Supplementary Table 10</b> Total fucosylated N-glycopeptides of proteins in human plasma commonly classified by SVM and DNN. A total of 46 fucosylated N-glycopeptides were validated previously (with references), while 36 were newly found.....160 | 160 |

### (2) List of supplementary figures:

|                                                                                                                                                                                                                                                                                                                                                                                                                                                                                                                                    |     |
|------------------------------------------------------------------------------------------------------------------------------------------------------------------------------------------------------------------------------------------------------------------------------------------------------------------------------------------------------------------------------------------------------------------------------------------------------------------------------------------------------------------------------------|-----|
| <b>Supplementary Figure 1</b> Representative CID MS/MS spectra of N-glycopeptides of (A) EEQYNSTYR_4_4_1_0 from an IgG standard and (B) NEEYNK_6_5_1_3 from an AGP standard, which were classified as core and outer fucosylated N-glycopeptides, respectively. Green circles = mannose; yellow circles = galactose; blue squares = N-acetylglucosamine; red triangles = fucose; pink diamonds = N-acetylneuraminic acid; red arrow = fucosylation diagnostic ions; red box = fragmented ions pairs with or without fucose.....163 | 163 |
| <b>Supplementary Figure 2</b> MS/MS spectra of N-glycopeptides identified from alpha-1-acid glycoprotein and immunoglobulin gamma for training set.....164                                                                                                                                                                                                                                                                                                                                                                         | 164 |
| <b>Supplementary Figure 3</b> MS/MS spectra of N-glycopeptides identified from alpha-1-acid glycoprotein and immunoglobulin gamma for test set.....597                                                                                                                                                                                                                                                                                                                                                                             | 597 |
| <b>Supplementary Figure 4</b> MS/MS spectra of N-glycopeptides identified from human plasma for unknown set.....990                                                                                                                                                                                                                                                                                                                                                                                                                | 990 |

**Supplementary Figure 5** Model selection of (a) deep neural network and (b) support vector machine.....1661

## Supplementary Tables

**Supplementary Table 1.** Glycopeptide spectrum matches of alpha-1-acid glycoprotein and immunoglobulin gamma, and their relative intensities as training set for machine learning.

| No. | Experiments | CID Scan No. | N-glycoproteins             | N-glycopeptides | Relative intensities of B/Y series ions |                  |                |                  |                  |                   |                |                  |                |                  |                |                  |                |                  | Manual Classification |
|-----|-------------|--------------|-----------------------------|-----------------|-----------------------------------------|------------------|----------------|------------------|------------------|-------------------|----------------|------------------|----------------|------------------|----------------|------------------|----------------|------------------|-----------------------|
|     |             |              |                             |                 | B <sub>2</sub>                          | B <sub>2</sub> F | B <sub>3</sub> | B <sub>3</sub> F | B <sub>2</sub> S | B <sub>2</sub> SF | Y <sub>1</sub> | Y <sub>1</sub> F | Y <sub>2</sub> | Y <sub>2</sub> F | Y <sub>3</sub> | Y <sub>3</sub> F | Y <sub>4</sub> | Y <sub>4</sub> F |                       |
| 1   | AGP exp_2   | 2144         | Alpha-1-acid glycoprotein 1 | ENGTISR_4_4_0_1 | 100.0                                   | 0.0              | 0.0            | 0.0              | 47.8             | 0.0               | 27.3           | 0.0              | 0.0            | 0.0              | 14.8           | 0.0              | 15.4           | 0.0              | None                  |
| 2   | AGP exp_1   | 2066         | Alpha-1-acid glycoprotein 1 | ENGTISR_4_4_0_1 | 26.2                                    | 0.0              | 0.0            | 0.0              | 44.2             | 0.0               | 26.8           | 0.0              | 23.7           | 0.0              | 100.0          | 0.0              | 0.0            | 0.0              | None                  |
| 3   | AGP exp_2   | 3657         | Alpha-1-acid glycoprotein 1 | ENGTISR_5_4_0_2 | 33.6                                    | 0.0              | 6.8            | 0.0              | 100.0            | 0.0               | 46.4           | 0.0              | 4.0            | 0.0              | 0.0            | 0.0              | 38.4           | 0.0              | None                  |
| 4   | AGP exp_2   | 3691         | Alpha-1-acid glycoprotein 1 | ENGTISR_5_4_0_2 | 0.0                                     | 0.0              | 0.0            | 0.0              | 87.8             | 0.0               | 100.0          | 0.0              | 7.8            | 0.0              | 18.9           | 0.0              | 38.6           | 0.0              | None                  |
| 5   | AGP exp_1   | 3850         | Alpha-1-acid glycoprotein 1 | ENGTISR_5_4_0_2 | 71.2                                    | 0.0              | 10.2           | 0.0              | 100.0            | 0.0               | 24.9           | 0.0              | 0.0            | 0.0              | 0.0            | 0.0              | 21.2           | 0.0              | None                  |
| 6   | AGP exp_1   | 2127         | Alpha-1-acid glycoprotein 1 | ENGTISR_6_5_0_1 | 100.0                                   | 0.0              | 6.7            | 0.0              | 46.5             | 0.0               | 36.6           | 0.0              | 3.6            | 0.0              | 0.0            | 0.0              | 30.5           | 0.0              | None                  |
| 7   | AGP exp_1   | 2266         | Alpha-1-acid glycoprotein 1 | ENGTISR_6_5_0_1 | 100.0                                   | 0.0              | 4.0            | 0.0              | 33.6             | 0.0               | 65.3           | 0.0              | 0.0            | 0.0              | 0.0            | 0.0              | 26.6           | 0.0              | None                  |
| 8   | AGP exp_1   | 2368         | Alpha-1-acid glycoprotein 1 | ENGTISR_6_5_0_1 | 100.0                                   | 0.0              | 12.5           | 0.0              | 47.8             | 0.0               | 65.4           | 0.0              | 0.0            | 0.0              | 0.0            | 0.0              | 36.5           | 0.0              | None                  |
| 9   | AGP exp_2   | 2404         | Alpha-1-acid glycoprotein 1 | ENGTISR_6_5_0_1 | 100.0                                   | 0.0              | 6.9            | 0.0              | 53.1             | 0.0               | 79.9           | 0.0              | 0.0            | 0.0              | 0.0            | 0.0              | 16.3           | 0.0              | None                  |
| 10  | AGP exp_2   | 2273         | Alpha-1-acid glycoprotein 1 | ENGTISR_6_5_0_1 | 100.0                                   | 0.0              | 8.8            | 0.0              | 51.5             | 0.0               | 30.5           | 0.0              | 0.0            | 0.0              | 0.0            | 0.0              | 8.7            | 0.0              | None                  |
| 11  | AGP exp_2   | 2122         | Alpha-1-acid glycoprotein 1 | ENGTISR_6_5_0_1 | 100.0                                   | 0.0              | 10.6           | 0.0              | 49.5             | 0.0               | 25.3           | 0.0              | 0.0            | 0.0              | 0.0            | 0.0              | 8.7            | 0.0              | None                  |
| 12  | AGP exp_2   | 3604         | Alpha-1-acid glycoprotein 1 | ENGTISR_6_5_0_2 | 60.7                                    | 0.0              | 5.5            | 0.0              | 100.0            | 0.0               | 26.9           | 0.0              | 5.2            | 0.0              | 0.0            | 0.0              | 7.7            | 0.0              | None                  |
| 13  | AGP exp_1   | 4033         | Alpha-1-acid glycoprotein 1 | ENGTISR_6_5_0_2 | 57.3                                    | 0.0              | 6.0            | 0.0              | 95.8             | 0.0               | 100.0          | 0.0              | 0.0            | 0.0              | 0.0            | 0.0              | 34.3           | 0.0              | None                  |
| 14  | AGP exp_2   | 3938         | Alpha-1-acid glycoprotein 1 | ENGTISR_6_5_0_2 | 71.8                                    | 0.0              | 5.2            | 0.0              | 100.0            | 0.0               | 74.7           | 0.0              | 5.8            | 0.0              | 0.0            | 0.0              | 39.9           | 0.0              | None                  |
| 15  | AGP exp_1   | 3756         | Alpha-1-acid glycoprotein 1 | ENGTISR_6_5_0_2 | 64.8                                    | 0.0              | 4.8            | 0.0              | 88.1             | 0.0               | 100.0          | 0.0              | 7.2            | 0.0              | 0.0            | 0.0              | 42.2           | 0.0              | None                  |
| 16  | AGP exp_2   | 3776         | Alpha-1-acid glycoprotein 1 | ENGTISR_6_5_0_2 | 0.0                                     | 0.0              | 0.0            | 0.0              | 15.6             | 0.0               | 100.0          | 0.0              | 17.9           | 0.0              | 13.6           | 0.0              | 14.1           | 0.0              | None                  |
| 17  | AGP exp_1   | 4838         | Alpha-1-acid glycoprotein 1 | ENGTISR_6_5_0_3 | 0.0                                     | 0.0              | 0.0            | 0.0              | 48.1             | 0.0               | 100.0          | 0.0              | 15.0           | 0.0              | 9.6            | 0.0              | 14.2           | 0.0              | None                  |
| 18  | AGP exp_1   | 4749         | Alpha-1-acid glycoprotein 1 | ENGTISR_6_5_0_3 | 10.2                                    | 0.0              | 0.0            | 0.0              | 100.0            | 0.0               | 36.1           | 0.0              | 4.0            | 0.0              | 0.0            | 0.0              | 15.6           | 0.0              | None                  |
| 19  | AGP exp_2   | 6210         | Alpha-1-acid glycoprotein 1 | ENGTISR_6_5_0_3 | 9.2                                     | 0.0              | 0.0            | 0.0              | 100.0            | 0.0               | 31.6           | 0.0              | 4.7            | 0.0              | 0.0            | 0.0              | 29.0           | 0.0              | None                  |
| 20  | AGP exp_1   | 5085         | Alpha-1-acid glycoprotein 1 | ENGTISR_6_5_0_3 | 28.3                                    | 0.0              | 0.0            | 0.0              | 100.0            | 0.0               | 45.3           | 0.0              | 3.6            | 0.0              | 0.0            | 0.0              | 31.4           | 0.0              | None                  |
| 21  | AGP exp_2   | 2248         | Alpha-1-acid glycoprotein 1 | ENGTISR_6_5_1_1 | 100.0                                   | 30.5             | 0.0            | 0.0              | 46.7             | 0.0               | 57.4           | 0.0              | 0.0            | 0.0              | 0.0            | 0.0              | 24.3           | 0.0              | Outer                 |
| 22  | AGP exp_1   | 2178         | Alpha-1-acid glycoprotein 1 | ENGTISR_6_5_1_1 | 100.0                                   | 25.0             | 0.0            | 0.0              | 53.7             | 0.0               | 48.5           | 0.0              | 0.0            | 0.0              | 0.0            | 0.0              | 12.4           | 0.0              | Outer                 |
| 23  | AGP exp_1   | 2305         | Alpha-1-acid glycoprotein 1 | ENGTISR_6_5_1_1 | 100.0                                   | 0.0              | 0.0            | 0.0              | 56.1             | 27.7              | 87.4           | 0.0              | 0.0            | 0.0              | 0.0            | 0.0              | 26.6           | 0.0              | Outer                 |
| 24  | AGP exp_1   | 2013         | Alpha-1-acid glycoprotein 1 | ENGTISR_6_5_1_1 | 100.0                                   | 36.7             | 0.0            | 0.0              | 61.0             | 36.9              | 23.3           | 0.0              | 0.0            | 0.0              | 0.0            | 0.0              | 10.5           | 0.0              | Outer                 |

**Supplementary Table 1. Continued.**

| No. | Experiments | CID Scan No. | N-glycoproteins             | N-glycopeptides | Relative intensities of B/Y series ions |                  |                |                  |                  |                   |                |                  |                |                  |                |                  |                |                  | Manual Classification |
|-----|-------------|--------------|-----------------------------|-----------------|-----------------------------------------|------------------|----------------|------------------|------------------|-------------------|----------------|------------------|----------------|------------------|----------------|------------------|----------------|------------------|-----------------------|
|     |             |              |                             |                 | B <sub>2</sub>                          | B <sub>2</sub> F | B <sub>3</sub> | B <sub>3</sub> F | B <sub>2</sub> S | B <sub>2</sub> SF | Y <sub>1</sub> | Y <sub>1</sub> F | Y <sub>2</sub> | Y <sub>2</sub> F | Y <sub>3</sub> | Y <sub>3</sub> F | Y <sub>4</sub> | Y <sub>4</sub> F |                       |
| 25  | AGP exp_1   | 3643         | Alpha-1-acid glycoprotein 1 | ENGTISR_6_5_1_2 | 71.9                                    | 13.4             | 6.1            | 0.0              | 100.0            | 37.0              | 98.5           | 0.0              | 3.2            | 0.0              | 0.0            | 0.0              | 46.3           | 3.0              | Outer                 |
| 26  | AGP exp_1   | 3953         | Alpha-1-acid glycoprotein 1 | ENGTISR_6_5_1_2 | 58.4                                    | 8.2              | 0.0            | 0.0              | 100.0            | 42.3              | 73.8           | 6.4              | 0.0            | 0.0              | 0.0            | 0.0              | 16.1           | 0.0              | Outer                 |
| 27  | AGP exp_2   | 3502         | Alpha-1-acid glycoprotein 1 | ENGTISR_6_5_1_2 | 90.5                                    | 17.3             | 0.0            | 0.0              | 100.0            | 20.6              | 36.7           | 0.0              | 0.0            | 0.0              | 0.0            | 0.0              | 0.0            | 0.0              | Outer                 |
| 28  | AGP exp_2   | 3805         | Alpha-1-acid glycoprotein 1 | ENGTISR_6_5_1_2 | 67.0                                    | 16.0             | 0.0            | 0.0              | 100.0            | 23.6              | 43.4           | 0.0              | 0.0            | 0.0              | 0.0            | 0.0              | 21.8           | 0.0              | Outer                 |
| 29  | AGP exp_2   | 4775         | Alpha-1-acid glycoprotein 1 | ENGTISR_6_5_1_3 | 18.5                                    | 5.9              | 3.7            | 0.0              | 100.0            | 35.3              | 89.2           | 0.0              | 7.7            | 0.0              | 0.0            | 0.0              | 56.9           | 2.8              | Outer                 |
| 30  | AGP exp_1   | 4665         | Alpha-1-acid glycoprotein 1 | ENGTISR_6_5_1_3 | 22.1                                    | 5.1              | 0.0            | 0.0              | 100.0            | 27.9              | 29.9           | 0.0              | 3.2            | 0.0              | 0.0            | 0.0              | 11.6           | 0.0              | Outer                 |
| 31  | AGP exp_45  | 9466         | Alpha-1-acid glycoprotein 1 | ENGTISR_6_5_2_3 | 0.0                                     | 4.9              | 0.0            | 0.0              | 100.0            | 60.7              | 73.8           | 0.0              | 0.0            | 0.0              | 0.0            | 0.0              | 54.2           | 11.4             | Dual                  |
| 32  | AGP exp_231 | 10181        | Alpha-1-acid glycoprotein 1 | ENGTISR_6_5_2_3 | 5.0                                     | 6.5              | 0.0            | 0.0              | 100.0            | 59.3              | 63.3           | 0.0              | 0.0            | 0.0              | 0.0            | 0.0              | 39.5           | 8.8              | Dual                  |
| 33  | AGP exp_29  | 7877         | Alpha-1-acid glycoprotein 1 | ENGTISR_6_5_2_3 | 0.0                                     | 9.7              | 0.0            | 0.0              | 99.4             | 66.4              | 100.0          | 0.0              | 0.0            | 0.0              | 0.0            | 0.0              | 34.2           | 8.8              | Dual                  |
| 34  | AGP exp_21  | 9470         | Alpha-1-acid glycoprotein 1 | ENGTISR_6_5_2_3 | 12.6                                    | 9.9              | 0.0            | 0.0              | 100.0            | 70.7              | 94.8           | 0.0              | 0.0            | 0.0              | 0.0            | 0.0              | 54.7           | 16.3             | Dual                  |
| 35  | AGP exp_8   | 8661         | Alpha-1-acid glycoprotein 1 | ENGTISR_6_5_2_3 | 0.0                                     | 9.1              | 0.0            | 0.0              | 100.0            | 58.3              | 90.8           | 0.0              | 8.3            | 0.0              | 0.0            | 0.0              | 43.8           | 12.5             | Dual                  |
| 36  | AGP exp_25  | 10476        | Alpha-1-acid glycoprotein 1 | ENGTISR_6_5_2_3 | 7.0                                     | 12.5             | 0.0            | 0.0              | 100.0            | 64.5              | 78.5           | 0.0              | 0.0            | 0.0              | 13.5           | 0.0              | 45.3           | 14.7             | Dual                  |
| 37  | AGP exp_33  | 13182        | Alpha-1-acid glycoprotein 1 | ENGTISR_6_5_2_3 | 5.9                                     | 12.0             | 0.0            | 0.0              | 100.0            | 76.3              | 75.5           | 2.5              | 5.4            | 0.0              | 0.0            | 0.0              | 38.9           | 7.6              | Dual                  |
| 38  | AGP exp_42  | 9926         | Alpha-1-acid glycoprotein 1 | ENGTISR_6_5_2_3 | 5.5                                     | 10.0             | 0.0            | 0.0              | 100.0            | 67.1              | 77.4           | 0.0              | 0.0            | 0.0              | 0.0            | 0.0              | 38.8           | 8.5              | Dual                  |
| 39  | AGP exp_19  | 9707         | Alpha-1-acid glycoprotein 1 | ENGTISR_6_5_2_3 | 5.4                                     | 9.6              | 0.0            | 0.0              | 100.0            | 67.1              | 87.0           | 0.0              | 0.0            | 0.0              | 0.0            | 0.0              | 48.9           | 9.1              | Dual                  |
| 40  | AGP exp_17  | 9678         | Alpha-1-acid glycoprotein 1 | ENGTISR_6_5_2_3 | 9.0                                     | 5.7              | 0.0            | 0.0              | 100.0            | 63.7              | 79.4           | 0.0              | 5.7            | 0.0              | 0.0            | 0.0              | 35.3           | 11.6             | Dual                  |
| 41  | AGP exp_18  | 9689         | Alpha-1-acid glycoprotein 1 | ENGTISR_6_5_2_3 | 7.8                                     | 11.7             | 0.0            | 0.0              | 100.0            | 67.4              | 91.9           | 0.0              | 0.0            | 0.0              | 0.0            | 0.0              | 40.8           | 15.8             | Dual                  |
| 42  | AGP exp_38  | 9793         | Alpha-1-acid glycoprotein 1 | ENGTISR_6_5_2_3 | 5.8                                     | 9.2              | 0.0            | 0.0              | 100.0            | 63.2              | 78.2           | 0.0              | 0.0            | 0.0              | 0.0            | 0.0              | 38.6           | 14.7             | Dual                  |
| 43  | AGP exp_26  | 10331        | Alpha-1-acid glycoprotein 1 | ENGTISR_6_5_2_3 | 9.0                                     | 11.5             | 0.0            | 0.0              | 100.0            | 48.7              | 79.4           | 0.0              | 9.4            | 0.0              | 0.0            | 0.0              | 38.7           | 8.4              | Dual                  |
| 44  | AGP exp_31  | 6869         | Alpha-1-acid glycoprotein 1 | ENGTISR_6_5_2_3 | 6.1                                     | 11.7             | 0.0            | 0.0              | 100.0            | 58.2              | 79.3           | 0.0              | 4.3            | 0.0              | 0.0            | 0.0              | 38.6           | 8.6              | Dual                  |
| 45  | AGP exp_37  | 10109        | Alpha-1-acid glycoprotein 1 | ENGTISR_6_5_2_3 | 0.0                                     | 0.0              | 0.0            | 0.0              | 100.0            | 47.3              | 30.2           | 21.7             | 0.0            | 0.0              | 0.0            | 0.0              | 5.4            | 12.0             | Dual                  |
| 46  | AGP exp_13  | 11998        | Alpha-1-acid glycoprotein 1 | ENGTISR_6_5_2_3 | 0.0                                     | 0.0              | 0.0            | 0.0              | 100.0            | 34.5              | 52.5           | 0.0              | 0.0            | 0.0              | 0.0            | 0.0              | 17.4           | 12.2             | Dual                  |
| 47  | AGP exp_1   | 4751         | Alpha-1-acid glycoprotein 1 | ENGTISR_6_5_2_3 | 0.0                                     | 8.1              | 0.0            | 0.0              | 100.0            | 48.5              | 30.7           | 0.0              | 0.0            | 0.0              | 0.0            | 0.0              | 14.8           | 0.0              | Outer                 |
| 48  | AGP exp_9   | 8629         | Alpha-1-acid glycoprotein 1 | ENGTISR_6_5_2_3 | 0.0                                     | 8.2              | 0.0            | 0.0              | 100.0            | 59.1              | 75.1           | 2.2              | 2.0            | 0.0              | 0.0            | 0.0              | 33.9           | 7.9              | Dual                  |
| 49  | AGP exp_33  | 8034         | Alpha-1-acid glycoprotein 1 | ENGTISR_6_5_2_3 | 0.0                                     | 0.0              | 0.0            | 0.0              | 100.0            | 35.9              | 26.7           | 17.3             | 0.0            | 0.0              | 0.0            | 0.0              | 11.5           | 4.8              | Dual                  |
| 50  | AGP exp_12  | 10883        | Alpha-1-acid glycoprotein 1 | ENGTISR_6_5_2_3 | 6.2                                     | 6.0              | 0.0            | 0.0              | 100.0            | 62.4              | 60.2           | 0.0              | 0.0            | 0.0              | 0.0            | 0.0              | 31.1           | 10.0             | Dual                  |

Supplementary Table 1. Continued.

| No. | Experiments | CID Scan No. | N-glycoproteins             | N-glycopeptides           | Relative intensities of B/Y series ions |                  |                |                  |                  |                   |                |                  |                |                  |                |                  |                |                  | Manual Classification |
|-----|-------------|--------------|-----------------------------|---------------------------|-----------------------------------------|------------------|----------------|------------------|------------------|-------------------|----------------|------------------|----------------|------------------|----------------|------------------|----------------|------------------|-----------------------|
|     |             |              |                             |                           | B <sub>2</sub>                          | B <sub>2</sub> F | B <sub>3</sub> | B <sub>3</sub> F | B <sub>2</sub> S | B <sub>2</sub> SF | Y <sub>1</sub> | Y <sub>1</sub> F | Y <sub>2</sub> | Y <sub>2</sub> F | Y <sub>3</sub> | Y <sub>3</sub> F | Y <sub>4</sub> | Y <sub>4</sub> F |                       |
| 51  | AGP exp_26  | 10629        | Alpha-1-acid glycoprotein 1 | ENGTISR_6_5_2_3           | 100.0                                   | 0.0              | 0.0            | 0.0              | 100.0            | 30.9              | 32.6           | 18.1             | 0.0            | 0.0              | 0.0            | 0.0              | 3.1            | 6.4              | Dual                  |
| 52  | AGP exp_42  | 10185        | Alpha-1-acid glycoprotein 1 | ENGTISR_6_5_2_3           | 6.4                                     | 6.2              | 0.0            | 0.0              | 100.0            | 42.4              | 22.2           | 9.1              | 0.0            | 0.0              | 0.0            | 0.0              | 5.8            | 9.5              | Dual                  |
| 53  | AGP exp_16  | 12458        | Alpha-1-acid glycoprotein 1 | ENGTISR_6_5_2_3           | 8.8                                     | 6.5              | 0.0            | 0.0              | 100.0            | 29.8              | 23.2           | 13.6             | 0.0            | 0.0              | 0.0            | 0.0              | 0.0            | 0.0              | Dual                  |
| 54  | AGP exp_43  | 9940         | Alpha-1-acid glycoprotein 1 | ENGTISR_6_5_2_3           | 0.0                                     | 0.0              | 0.0            | 0.0              | 100.0            | 50.0              | 37.5           | 22.8             | 0.0            | 0.0              | 0.0            | 0.0              | 15.1           | 17.8             | Dual                  |
| 55  | AGP exp_20  | 10302        | Alpha-1-acid glycoprotein 1 | ENGTISR_6_5_2_3           | 11.4                                    | 13.3             | 10.2           | 0.0              | 100.0            | 62.1              | 55.2           | 18.8             | 5.6            | 0.0              | 0.0            | 0.0              | 16.3           | 11.1             | Dual                  |
| 56  | AGP exp_15  | 12345        | Alpha-1-acid glycoprotein 1 | ENGTISR_6_5_2_3           | 0.0                                     | 6.1              | 0.0            | 0.0              | 100.0            | 36.9              | 21.8           | 15.0             | 0.0            | 0.0              | 0.0            | 0.0              | 3.1            | 8.0              | Dual                  |
| 57  | AGP exp_2   | 4761         | Alpha-1-acid glycoprotein 1 | ENGTISR_6_5_2_3           | 9.8                                     | 9.7              | 0.0            | 0.0              | 100.0            | 54.0              | 71.3           | 0.0              | 0.0            | 0.0              | 0.0            | 0.0              | 36.3           | 6.7              | Dual                  |
| 58  | AGP exp_2   | 4640         | Alpha-1-acid glycoprotein 1 | ENGTISR_7_6_0_3           | 60.8                                    | 0.0              | 2.9            | 0.0              | 100.0            | 0.0               | 14.0           | 0.0              | 0.0            | 0.0              | 0.0            | 0.0              | 3.7            | 0.0              | None                  |
| 59  | AGP exp_2   | 2168         | Alpha-1-acid glycoprotein 1 | ENGTISR_7_6_1_1           | 100.0                                   | 35.8             | 0.0            | 0.0              | 62.5             | 39.2              | 31.0           | 0.0              | 0.0            | 0.0              | 0.0            | 0.0              | 0.0            | 0.0              | Outer                 |
| 60  | AGP exp_1   | 3674         | Alpha-1-acid glycoprotein 1 | ENGTISR_7_6_1_2           | 20.4                                    | 11.8             | 0.0            | 0.0              | 100.0            | 38.6              | 71.2           | 0.0              | 0.0            | 0.0              | 0.0            | 0.0              | 0.0            | 0.0              | Outer                 |
| 61  | AGP exp_2   | 3280         | Alpha-1-acid glycoprotein 1 | ENGTISR_7_6_1_2           | 9.9                                     | 14.5             | 0.0            | 0.0              | 100.0            | 13.5              | 41.5           | 0.0              | 0.0            | 0.0              | 0.0            | 0.0              | 0.0            | 0.0              | Outer                 |
| 62  | AGP exp_2   | 3574         | Alpha-1-acid glycoprotein 1 | ENGTISR_7_6_1_2           | 30.5                                    | 21.4             | 0.0            | 0.0              | 100.0            | 40.9              | 97.6           | 0.0              | 0.0            | 0.0              | 0.0            | 0.0              | 0.0            | 0.0              | Outer                 |
| 63  | AGP exp_2   | 2931         | Alpha-1-acid glycoprotein 1 | ENGTISR_7_6_1_2           | 32.0                                    | 19.6             | 0.0            | 0.0              | 100.0            | 32.3              | 85.8           | 0.0              | 0.0            | 0.0              | 0.0            | 0.0              | 0.0            | 0.0              | Outer                 |
| 64  | AGP exp_1   | 3385         | Alpha-1-acid glycoprotein 1 | ENGTISR_7_6_1_2           | 30.7                                    | 20.7             | 0.0            | 0.0              | 100.0            | 39.1              | 79.7           | 0.0              | 0.0            | 0.0              | 0.0            | 0.0              | 0.0            | 0.0              | Outer                 |
| 65  | AGP exp_1   | 2790         | Alpha-1-acid glycoprotein 1 | ENGTISR_7_6_1_2           | 24.0                                    | 16.5             | 0.0            | 0.0              | 100.0            | 22.5              | 59.4           | 0.0              | 0.0            | 0.0              | 0.0            | 0.0              | 0.0            | 0.0              | Outer                 |
| 66  | AGP exp_2   | 3895         | Alpha-1-acid glycoprotein 1 | ENGTISR_7_6_1_2           | 34.5                                    | 0.0              | 0.0            | 0.0              | 100.0            | 14.2              | 22.4           | 6.1              | 0.0            | 0.0              | 0.0            | 0.0              | 0.0            | 0.0              | Outer                 |
| 67  | AGP exp_1   | 4688         | Alpha-1-acid glycoprotein 1 | ENGTISR_7_6_1_3           | 100.0                                   | 5.4              | 0.0            | 0.0              | 91.0             | 31.1              | 21.4           | 0.0              | 0.0            | 0.0              | 0.0            | 0.0              | 5.7            | 0.0              | Outer                 |
| 68  | AGP exp_2   | 4696         | Alpha-1-acid glycoprotein 1 | ENGTISR_7_6_1_3           | 65.4                                    | 7.1              | 4.6            | 0.0              | 100.0            | 26.6              | 20.0           | 0.0              | 0.0            | 0.0              | 0.0            | 0.0              | 6.0            | 0.0              | Outer                 |
| 69  | AGP exp_1   | 6102         | Alpha-1-acid glycoprotein 1 | ENGTISR_7_6_1_4           | 26.9                                    | 3.3              | 0.0            | 0.0              | 100.0            | 27.4              | 9.3            | 0.0              | 0.0            | 0.0              | 0.0            | 0.0              | 4.3            | 0.0              | Outer                 |
| 70  | AGP exp_2   | 6114         | Alpha-1-acid glycoprotein 1 | ENGTISR_7_6_1_4           | 30.4                                    | 4.0              | 0.0            | 0.0              | 100.0            | 27.4              | 10.4           | 0.0              | 0.0            | 0.0              | 0.0            | 0.0              | 3.5            | 0.0              | Outer                 |
| 71  | AGP exp_1   | 5897         | Alpha-1-acid glycoprotein 1 | ENGTISR_7_6_2_4           | 39.8                                    | 0.0              | 0.0            | 0.0              | 100.0            | 65.2              | 9.1            | 0.0              | 0.0            | 0.0              | 0.0            | 0.0              | 4.3            | 0.0              | Outer                 |
| 72  | AGP exp_2   | 18684        | Alpha-1-acid glycoprotein 1 | LVPVPITNATLDQITGK_4_4_0_1 | 75.6                                    | 0.0              | 0.0            | 0.0              | 100.0            | 0.0               | 62.2           | 15.9             | 0.0            | 0.0              | 0.0            | 0.0              | 74.8           | 0.0              | None                  |
| 73  | AGP exp_2   | 18849        | Alpha-1-acid glycoprotein 1 | LVPVPITNATLDQITGK_5_4_0_1 | 92.0                                    | 0.0              | 0.0            | 0.0              | 100.0            | 0.0               | 67.1           | 0.0              | 32.1           | 0.0              | 26.9           | 0.0              | 60.4           | 0.0              | None                  |
| 74  | AGP exp_2   | 18402        | Alpha-1-acid glycoprotein 1 | LVPVPITNATLDQITGK_5_4_0_1 | 71.0                                    | 0.0              | 0.0            | 0.0              | 46.8             | 0.0               | 54.3           | 0.0              | 0.0            | 0.0              | 9.3            | 0.0              | 100.0          | 0.0              | None                  |
| 75  | AGP exp_1   | 18035        | Alpha-1-acid glycoprotein 1 | LVPVPITNATLDQITGK_5_4_0_1 | 63.5                                    | 0.0              | 0.0            | 0.0              | 55.8             | 0.0               | 61.1           | 0.0              | 4.1            | 0.0              | 13.0           | 0.0              | 100.0          | 0.0              | None                  |
| 76  | AGP exp_1   | 21226        | Alpha-1-acid glycoprotein 1 | LVPVPITNATLDQITGK_5_4_0_2 | 0.0                                     | 0.0              | 0.0            | 0.0              | 100.0            | 0.0               | 74.6           | 0.0              | 8.6            | 0.0              | 10.3           | 0.0              | 39.5           | 0.0              | None                  |

Supplementary Table 1. Continued.

| No. | Experiments | CID Scan No. | N-glycoproteins             | N-glycopeptides           | Relative intensities of B/Y series ions |                  |                |                  |                  |                   |                |                  |                |                  |                |                  |                |                  | Manual Classification |
|-----|-------------|--------------|-----------------------------|---------------------------|-----------------------------------------|------------------|----------------|------------------|------------------|-------------------|----------------|------------------|----------------|------------------|----------------|------------------|----------------|------------------|-----------------------|
|     |             |              |                             |                           | B <sub>2</sub>                          | B <sub>2</sub> F | B <sub>3</sub> | B <sub>3</sub> F | B <sub>2</sub> S | B <sub>2</sub> SF | Y <sub>1</sub> | Y <sub>1</sub> F | Y <sub>2</sub> | Y <sub>2</sub> F | Y <sub>3</sub> | Y <sub>3</sub> F | Y <sub>4</sub> | Y <sub>4</sub> F |                       |
| 77  | AGP exp_2   | 21895        | Alpha-1-acid glycoprotein 1 | LVPVPITNATLDQITGK_5_4_0_2 | 0.0                                     | 0.0              | 0.0            | 0.0              | 100.0            | 0.0               | 62.3           | 0.0              | 11.6           | 0.0              | 9.5            | 0.0              | 27.1           | 0.0              | None                  |
| 78  | AGP exp_1   | 20953        | Alpha-1-acid glycoprotein 1 | LVPVPITNATLDQITGK_5_4_0_2 | 0.0                                     | 0.0              | 0.0            | 0.0              | 100.0            | 0.0               | 80.8           | 0.0              | 12.2           | 0.0              | 12.0           | 0.0              | 33.5           | 0.0              | None                  |
| 79  | AGP exp_2   | 22177        | Alpha-1-acid glycoprotein 1 | LVPVPITNATLDQITGK_5_4_0_2 | 0.0                                     | 0.0              | 0.0            | 0.0              | 100.0            | 0.0               | 74.0           | 0.0              | 10.2           | 0.0              | 13.8           | 0.0              | 34.9           | 0.0              | None                  |
| 80  | AGP exp_2   | 22181        | Alpha-1-acid glycoprotein 1 | LVPVPITNATLDQITGK_5_4_0_2 | 56.3                                    | 0.0              | 7.0            | 0.0              | 100.0            | 0.0               | 3.3            | 0.0              | 10.4           | 0.0              | 15.4           | 0.0              | 88.1           | 0.0              | None                  |
| 81  | AGP exp_1   | 21228        | Alpha-1-acid glycoprotein 1 | LVPVPITNATLDQITGK_5_4_0_2 | 64.9                                    | 0.0              | 5.1            | 0.0              | 100.0            | 0.0               | 2.7            | 0.0              | 8.6            | 0.0              | 13.6           | 0.0              | 65.5           | 0.0              | None                  |
| 82  | AGP exp_1   | 17744        | Alpha-1-acid glycoprotein 1 | LVPVPITNATLDQITGK_6_5_0_1 | 100.0                                   | 0.0              | 6.6            | 0.0              | 47.4             | 0.0               | 38.9           | 0.0              | 9.6            | 0.0              | 21.4           | 0.0              | 58.0           | 0.0              | None                  |
| 83  | AGP exp_2   | 18417        | Alpha-1-acid glycoprotein 1 | LVPVPITNATLDQITGK_6_5_0_1 | 100.0                                   | 0.0              | 9.6            | 0.0              | 47.3             | 0.0               | 51.5           | 0.0              | 0.0            | 0.0              | 12.7           | 0.0              | 49.2           | 0.0              | None                  |
| 84  | AGP exp_2   | 21663        | Alpha-1-acid glycoprotein 1 | LVPVPITNATLDQITGK_6_5_0_2 | 0.0                                     | 0.0              | 0.0            | 0.0              | 97.9             | 0.0               | 100.0          | 0.0              | 10.0           | 0.0              | 19.9           | 0.0              | 72.0           | 0.0              | None                  |
| 85  | AGP exp_2   | 21947        | Alpha-1-acid glycoprotein 1 | LVPVPITNATLDQITGK_6_5_0_2 | 0.0                                     | 0.0              | 0.0            | 0.0              | 100.0            | 0.0               | 98.1           | 0.0              | 12.7           | 0.0              | 24.1           | 0.0              | 81.9           | 0.0              | None                  |
| 86  | AGP exp_2   | 24574        | Alpha-1-acid glycoprotein 1 | LVPVPITNATLDQITGK_6_5_0_2 | 40.4                                    | 0.0              | 5.8            | 0.0              | 100.0            | 0.0               | 46.4           | 0.0              | 1.9            | 0.0              | 8.1            | 0.0              | 46.4           | 0.0              | None                  |
| 87  | AGP exp_1   | 21160        | Alpha-1-acid glycoprotein 1 | LVPVPITNATLDQITGK_6_5_0_2 | 65.7                                    | 0.0              | 7.9            | 0.0              | 100.0            | 0.0               | 37.4           | 0.0              | 3.1            | 0.0              | 14.9           | 0.0              | 49.4           | 0.0              | None                  |
| 88  | AGP exp_1   | 20785        | Alpha-1-acid glycoprotein 1 | LVPVPITNATLDQITGK_6_5_0_2 | 72.1                                    | 0.0              | 7.3            | 0.0              | 100.0            | 0.0               | 54.1           | 0.0              | 4.9            | 0.0              | 16.5           | 0.0              | 50.5           | 0.0              | None                  |
| 89  | AGP exp_1   | 23576        | Alpha-1-acid glycoprotein 1 | LVPVPITNATLDQITGK_6_5_0_2 | 80.0                                    | 0.0              | 8.1            | 0.0              | 100.0            | 0.0               | 49.6           | 0.0              | 3.7            | 0.0              | 22.2           | 0.0              | 66.3           | 0.0              | None                  |
| 90  | AGP exp_2   | 22166        | Alpha-1-acid glycoprotein 1 | LVPVPITNATLDQITGK_6_5_0_2 | 77.5                                    | 0.0              | 8.2            | 0.0              | 100.0            | 0.0               | 56.9           | 0.0              | 0.0            | 0.0              | 8.8            | 0.0              | 56.1           | 0.0              | None                  |
| 91  | AGP exp_2   | 24680        | Alpha-1-acid glycoprotein 1 | LVPVPITNATLDQITGK_6_5_0_3 | 0.0                                     | 0.0              | 0.0            | 0.0              | 100.0            | 0.0               | 62.3           | 0.0              | 7.4            | 0.0              | 8.4            | 0.0              | 24.7           | 0.0              | None                  |
| 92  | AGP exp_1   | 23647        | Alpha-1-acid glycoprotein 1 | LVPVPITNATLDQITGK_6_5_0_3 | 30.6                                    | 0.0              | 3.6            | 0.0              | 100.0            | 0.0               | 40.0           | 0.0              | 5.6            | 0.0              | 8.0            | 0.0              | 37.9           | 0.0              | None                  |
| 93  | AGP exp_1   | 23454        | Alpha-1-acid glycoprotein 1 | LVPVPITNATLDQITGK_6_5_0_3 | 0.0                                     | 0.0              | 0.0            | 0.0              | 100.0            | 0.0               | 69.4           | 0.0              | 7.6            | 0.0              | 10.6           | 0.0              | 22.3           | 0.0              | None                  |
| 94  | AGP exp_2   | 24316        | Alpha-1-acid glycoprotein 1 | LVPVPITNATLDQITGK_6_5_0_3 | 32.2                                    | 0.0              | 3.5            | 0.0              | 100.0            | 0.0               | 37.8           | 0.0              | 4.9            | 0.0              | 7.7            | 0.0              | 28.9           | 0.0              | None                  |
| 95  | AGP exp_1   | 23791        | Alpha-1-acid glycoprotein 1 | LVPVPITNATLDQITGK_6_5_0_3 | 33.7                                    | 0.0              | 3.2            | 0.0              | 100.0            | 0.0               | 39.9           | 0.0              | 8.5            | 0.0              | 9.0            | 0.0              | 40.8           | 0.0              | None                  |
| 96  | AGP exp_1   | 23496        | Alpha-1-acid glycoprotein 1 | LVPVPITNATLDQITGK_6_5_0_3 | 32.5                                    | 0.0              | 3.2            | 0.0              | 100.0            | 0.0               | 40.1           | 0.0              | 5.8            | 0.0              | 7.9            | 0.0              | 35.0           | 0.0              | None                  |
| 97  | AGP exp_2   | 24786        | Alpha-1-acid glycoprotein 1 | LVPVPITNATLDQITGK_6_5_0_3 | 36.5                                    | 0.0              | 2.4            | 0.0              | 100.0            | 0.0               | 28.2           | 0.0              | 4.7            | 0.0              | 4.8            | 0.0              | 38.6           | 0.0              | None                  |
| 98  | AGP exp_2   | 18341        | Alpha-1-acid glycoprotein 1 | LVPVPITNATLDQITGK_6_5_1_1 | 0.0                                     | 14.5             | 0.0            | 0.0              | 58.6             | 40.2              | 100.0          | 0.0              | 13.2           | 0.0              | 13.4           | 0.0              | 58.3           | 0.0              | Outer                 |
| 99  | AGP exp_1   | 17678        | Alpha-1-acid glycoprotein 1 | LVPVPITNATLDQITGK_6_5_1_1 | 0.0                                     | 19.3             | 0.0            | 0.0              | 59.8             | 43.0              | 100.0          | 0.0              | 0.0            | 0.0              | 11.1           | 0.0              | 34.6           | 0.0              | Outer                 |
| 100 | AGP exp_2   | 18352        | Alpha-1-acid glycoprotein 1 | LVPVPITNATLDQITGK_6_5_1_1 | 100.0                                   | 18.9             | 0.0            | 0.0              | 55.5             | 25.7              | 44.2           | 0.0              | 0.0            | 0.0              | 12.8           | 0.0              | 43.1           | 0.0              | Outer                 |
| 101 | AGP exp_1   | 20837        | Alpha-1-acid glycoprotein 1 | LVPVPITNATLDQITGK_6_5_1_2 | 0.0                                     | 10.7             | 0.0            | 0.0              | 100.0            | 58.0              | 89.2           | 0.0              | 0.0            | 0.0              | 10.2           | 0.0              | 32.5           | 0.0              | Outer                 |
| 102 | AGP exp_2   | 21492        | Alpha-1-acid glycoprotein 1 | LVPVPITNATLDQITGK_6_5_1_2 | 0.0                                     | 20.5             | 0.0            | 0.0              | 100.0            | 12.2              | 64.8           | 0.0              | 0.0            | 0.0              | 0.0            | 0.0              | 10.4           | 0.0              | Outer                 |

Supplementary Table 1. Continued.

| No. | Experiments | CID Scan No. | N-glycoproteins               | N-glycopeptides           | Relative intensities of B/Y series ions |                  |                |                  |                  |                   |                |                  |                |                  |                |                  |                |                  | Manual Classification |
|-----|-------------|--------------|-------------------------------|---------------------------|-----------------------------------------|------------------|----------------|------------------|------------------|-------------------|----------------|------------------|----------------|------------------|----------------|------------------|----------------|------------------|-----------------------|
|     |             |              |                               |                           | B <sub>2</sub>                          | B <sub>2</sub> F | B <sub>3</sub> | B <sub>3</sub> F | B <sub>2</sub> S | B <sub>2</sub> SF | Y <sub>1</sub> | Y <sub>1</sub> F | Y <sub>2</sub> | Y <sub>2</sub> F | Y <sub>3</sub> | Y <sub>3</sub> F | Y <sub>4</sub> | Y <sub>4</sub> F |                       |
| 103 | AGP exp_2   | 21811        | Alpha-1-acid glycoprotein 1   | LVPVPITNATLDQITGK_6_5_1_2 | 0.0                                     | 11.3             | 0.0            | 0.0              | 100.0            | 53.5              | 84.0           | 0.0              | 8.6            | 0.0              | 0.0            | 0.0              | 29.1           | 0.0              | Outer                 |
| 104 | AGP exp_2   | 21715        | Alpha-1-acid glycoprotein 1   | LVPVPITNATLDQITGK_6_5_1_2 | 71.5                                    | 13.5             | 5.7            | 0.0              | 100.0            | 35.3              | 54.1           | 0.0              | 8.9            | 0.0              | 16.1           | 0.0              | 56.1           | 1.4              | Outer                 |
| 105 | AGP exp_1   | 20848        | Alpha-1-acid glycoprotein 1   | LVPVPITNATLDQITGK_6_5_1_2 | 75.0                                    | 15.1             | 7.8            | 0.0              | 100.0            | 36.2              | 58.1           | 0.0              | 6.2            | 0.0              | 17.7           | 0.0              | 66.9           | 0.0              | Outer                 |
| 106 | AGP exp_1   | 20524        | Alpha-1-acid glycoprotein 1   | LVPVPITNATLDQITGK_6_5_1_2 | 46.7                                    | 11.4             | 0.0            | 0.0              | 100.0            | 10.9              | 36.2           | 0.0              | 5.1            | 0.0              | 0.0            | 0.0              | 26.8           | 0.0              | Outer                 |
| 107 | AGP exp_1   | 23819        | Alpha-1-acid glycoprotein 1   | LVPVPITNATLDQITGK_6_5_1_3 | 0.0                                     | 7.0              | 0.0            | 0.0              | 100.0            | 27.3              | 34.8           | 0.0              | 0.0            | 0.0              | 0.0            | 0.0              | 16.2           | 0.0              | Outer                 |
| 108 | AGP exp_2   | 24491        | Alpha-1-acid glycoprotein 1   | LVPVPITNATLDQITGK_6_5_1_3 | 0.0                                     | 0.0              | 0.0            | 0.0              | 100.0            | 33.8              | 72.5           | 0.0              | 7.2            | 0.0              | 12.7           | 0.0              | 28.2           | 0.0              | Outer                 |
| 109 | AGP exp_2   | 24741        | Alpha-1-acid glycoprotein 1   | LVPVPITNATLDQITGK_6_5_1_3 | 0.0                                     | 0.0              | 0.0            | 0.0              | 100.0            | 34.9              | 43.7           | 0.0              | 5.8            | 0.0              | 9.3            | 0.0              | 30.1           | 0.0              | Outer                 |
| 110 | AGP exp_1   | 23564        | Alpha-1-acid glycoprotein 1   | LVPVPITNATLDQITGK_6_5_1_3 | 0.0                                     | 0.0              | 0.0            | 0.0              | 100.0            | 39.0              | 62.9           | 0.0              | 0.0            | 0.0              | 7.7            | 0.0              | 30.2           | 0.0              | Outer                 |
| 111 | AGP exp_1   | 23449        | Alpha-1-acid glycoprotein 1   | LVPVPITNATLDQITGK_6_5_1_3 | 30.5                                    | 6.2              | 3.4            | 0.0              | 100.0            | 30.2              | 39.7           | 0.0              | 6.5            | 0.0              | 10.8           | 0.0              | 43.4           | 0.0              | Outer                 |
| 112 | AGP exp_2   | 24453        | Alpha-1-acid glycoprotein 1   | LVPVPITNATLDQITGK_6_5_1_3 | 52.4                                    | 10.2             | 7.4            | 0.0              | 100.0            | 49.7              | 82.0           | 0.0              | 9.8            | 0.0              | 22.9           | 0.0              | 68.9           | 0.0              | Outer                 |
| 113 | AGP exp_2   | 24527        | Alpha-1-acid glycoprotein 1   | LVPVPITNATLDQITGK_6_5_1_3 | 30.9                                    | 1.8              | 3.5            | 0.0              | 100.0            | 26.2              | 43.9           | 0.0              | 5.9            | 0.0              | 5.7            | 0.0              | 36.0           | 0.0              | Outer                 |
| 114 | AGP exp_1   | 23649        | Alpha-1-acid glycoprotein 1   | LVPVPITNATLDQITGK_6_5_1_3 | 26.7                                    | 6.0              | 3.7            | 0.0              | 100.0            | 18.4              | 36.7           | 0.0              | 2.5            | 0.0              | 10.0           | 3.6              | 30.2           | 0.0              | Outer                 |
| 115 | AGP exp_2   | 24762        | Alpha-1-acid glycoprotein 1   | LVPVPITNATLDQITGK_6_5_1_3 | 22.0                                    | 0.0              | 0.0            | 0.0              | 100.0            | 29.0              | 21.6           | 0.0              | 0.0            | 0.0              | 7.5            | 0.0              | 47.7           | 0.0              | Outer                 |
| 116 | AGP exp_19  | 35459        | Alpha-1-acid glycoprotein 1   | LVPVPITNATLDQITGK_6_5_2_2 | 0.0                                     | 25.5             | 0.0            | 0.0              | 100.0            | 44.8              | 54.6           | 0.0              | 0.0            | 0.0              | 0.0            | 0.0              | 16.0           | 9.8              | Dual                  |
| 117 | AGP exp_11  | 29920        | Alpha-1-acid glycoprotein 1   | LVPVPITNATLDQITGK_6_5_2_3 | 21.7                                    | 5.9              | 4.8            | 0.0              | 100.0            | 21.3              | 11.0           | 13.4             | 0.0            | 0.0              | 1.5            | 3.0              | 6.1            | 22.4             | Dual                  |
| 118 | AGP exp_1   | 1604         | Alpha-1-acid glycoprotein 1,2 | NEEYNK_4_3_0_0            | 33.4                                    | 0.0              | 12.2           | 0.0              | 3.8              | 0.0               | 100.0          | 0.0              | 4.8            | 0.0              | 10.4           | 0.0              | 74.9           | 0.0              | None                  |
| 119 | AGP exp_2   | 1620         | Alpha-1-acid glycoprotein 1,2 | NEEYNK_4_3_0_0            | 38.5                                    | 0.0              | 6.2            | 0.0              | 0.0              | 0.0               | 100.0          | 0.0              | 3.9            | 0.0              | 4.3            | 0.0              | 50.8           | 0.0              | None                  |
| 120 | AGP exp_2   | 1459         | Alpha-1-acid glycoprotein 1,2 | NEEYNK_4_3_0_1            | 29.9                                    | 0.0              | 9.7            | 0.0              | 23.2             | 0.0               | 37.5           | 0.0              | 11.3           | 0.0              | 14.9           | 0.0              | 100.0          | 0.0              | None                  |
| 121 | AGP exp_2   | 1456         | Alpha-1-acid glycoprotein 1,2 | NEEYNK_4_3_0_1            | 27.6                                    | 0.0              | 0.0            | 0.0              | 19.9             | 0.0               | 41.5           | 0.0              | 18.3           | 0.0              | 18.4           | 0.0              | 100.0          | 0.0              | None                  |
| 122 | AGP exp_2   | 1955         | Alpha-1-acid glycoprotein 1,2 | NEEYNK_4_3_0_1            | 15.7                                    | 0.0              | 4.4            | 0.0              | 33.9             | 0.0               | 100.0          | 0.0              | 5.2            | 0.0              | 6.1            | 0.0              | 69.0           | 0.0              | None                  |
| 123 | AGP exp_1   | 1707         | Alpha-1-acid glycoprotein 1,2 | NEEYNK_4_3_0_1            | 27.0                                    | 0.0              | 0.0            | 0.0              | 41.8             | 0.0               | 100.0          | 0.0              | 7.3            | 0.0              | 2.9            | 0.0              | 58.1           | 0.0              | None                  |
| 124 | AGP exp_1   | 1461         | Alpha-1-acid glycoprotein 1,2 | NEEYNK_4_3_0_1            | 28.1                                    | 0.0              | 8.9            | 0.0              | 19.1             | 0.0               | 36.8           | 0.0              | 12.4           | 0.0              | 11.4           | 0.0              | 100.0          | 0.0              | None                  |
| 125 | AGP exp_2   | 1582         | Alpha-1-acid glycoprotein 1,2 | NEEYNK_4_4_0_1            | 29.1                                    | 0.0              | 0.0            | 0.0              | 39.4             | 0.0               | 100.0          | 0.0              | 23.0           | 0.0              | 42.0           | 0.0              | 72.7           | 0.0              | None                  |
| 126 | AGP exp_2   | 1774         | Alpha-1-acid glycoprotein 1,2 | NEEYNK_4_4_0_1            | 15.2                                    | 0.0              | 5.0            | 0.0              | 36.1             | 0.0               | 100.0          | 0.0              | 13.3           | 0.0              | 8.0            | 0.0              | 49.7           | 0.0              | None                  |
| 127 | AGP exp_1   | 1730         | Alpha-1-acid glycoprotein 1,2 | NEEYNK_4_4_0_1            | 14.8                                    | 0.0              | 5.8            | 0.0              | 28.7             | 0.0               | 100.0          | 0.0              | 20.2           | 0.0              | 16.4           | 0.0              | 46.0           | 0.0              | None                  |
| 128 | AGP exp_1   | 1571         | Alpha-1-acid glycoprotein 1,2 | NEEYNK_4_4_0_1            | 23.7                                    | 0.0              | 0.0            | 0.0              | 73.2             | 0.0               | 100.0          | 0.0              | 57.9           | 0.0              | 72.5           | 0.0              | 64.2           | 0.0              | None                  |



Supplementary Table 1. Continued.

| No. | Experiments | CID Scan No. | N-glycoproteins               | N-glycopeptides | Relative intensities of B/Y series ions |                  |                |                  |                  |                   |                |                  |                |                  |                |                  |                |                  | Manual Classification |
|-----|-------------|--------------|-------------------------------|-----------------|-----------------------------------------|------------------|----------------|------------------|------------------|-------------------|----------------|------------------|----------------|------------------|----------------|------------------|----------------|------------------|-----------------------|
|     |             |              |                               |                 | B <sub>2</sub>                          | B <sub>2</sub> F | B <sub>3</sub> | B <sub>3</sub> F | B <sub>2</sub> S | B <sub>2</sub> SF | Y <sub>1</sub> | Y <sub>1</sub> F | Y <sub>2</sub> | Y <sub>2</sub> F | Y <sub>3</sub> | Y <sub>3</sub> F | Y <sub>4</sub> | Y <sub>4</sub> F |                       |
| 129 | AGP exp_1   | 1598         | Alpha-1-acid glycoprotein 1,2 | NEEYNK_4_4_0_1  | 100.0                                   | 0.0              | 29.5           | 0.0              | 97.2             | 0.0               | 57.6           | 0.0              | 0.0            | 0.0              | 0.0            | 0.0              | 42.4           | 0.0              | None                  |
| 130 | AGP exp_1   | 1432         | Alpha-1-acid glycoprotein 1,2 | NEEYNK_5_4_0_0  | 80.1                                    | 0.0              | 8.3            | 0.0              | 0.0              | 0.0               | 100.0          | 0.0              | 0.0            | 0.0              | 9.1            | 0.0              | 34.8           | 0.0              | None                  |
| 131 | AGP exp_2   | 1404         | Alpha-1-acid glycoprotein 1,2 | NEEYNK_5_4_0_0  | 71.5                                    | 0.0              | 14.4           | 0.0              | 0.0              | 0.0               | 100.0          | 0.0              | 0.0            | 0.0              | 13.2           | 0.0              | 60.2           | 0.0              | None                  |
| 132 | AGP exp_2   | 1622         | Alpha-1-acid glycoprotein 1,2 | NEEYNK_5_4_0_0  | 57.6                                    | 0.0              | 14.0           | 0.0              | 0.0              | 0.0               | 100.0          | 0.0              | 0.0            | 0.0              | 8.2            | 0.0              | 28.4           | 0.0              | None                  |
| 133 | AGP exp_2   | 1871         | Alpha-1-acid glycoprotein 1,2 | NEEYNK_5_4_0_0  | 61.7                                    | 0.0              | 25.7           | 0.0              | 0.0              | 0.0               | 100.0          | 0.0              | 0.0            | 0.0              | 10.7           | 0.0              | 37.9           | 0.0              | None                  |
| 134 | AGP exp_2   | 1963         | Alpha-1-acid glycoprotein 1,2 | NEEYNK_5_4_0_1  | 100.0                                   | 0.0              | 8.0            | 0.0              | 57.0             | 0.0               | 44.3           | 0.0              | 0.0            | 0.0              | 0.0            | 0.0              | 28.3           | 0.0              | None                  |
| 135 | AGP exp_2   | 1960         | Alpha-1-acid glycoprotein 1,2 | NEEYNK_5_4_0_1  | 0.0                                     | 0.0              | 3.3            | 0.0              | 19.8             | 0.0               | 100.0          | 0.0              | 14.8           | 0.0              | 5.4            | 0.0              | 31.0           | 0.0              | None                  |
| 136 | AGP exp_2   | 1776         | Alpha-1-acid glycoprotein 1,2 | NEEYNK_5_4_0_1  | 100.0                                   | 0.0              | 7.0            | 0.0              | 57.0             | 0.0               | 46.6           | 0.0              | 3.5            | 0.0              | 4.4            | 0.0              | 31.8           | 0.0              | None                  |
| 137 | AGP exp_2   | 1772         | Alpha-1-acid glycoprotein 1,2 | NEEYNK_5_4_0_1  | 0.0                                     | 0.0              | 6.0            | 0.0              | 29.2             | 0.0               | 100.0          | 0.0              | 21.5           | 0.0              | 11.9           | 0.0              | 42.9           | 0.0              | None                  |
| 138 | AGP exp_1   | 1942         | Alpha-1-acid glycoprotein 1,2 | NEEYNK_5_4_0_1  | 100.0                                   | 0.0              | 7.4            | 0.0              | 53.5             | 0.0               | 41.4           | 0.0              | 0.0            | 0.0              | 0.0            | 0.0              | 28.8           | 0.0              | None                  |
| 139 | AGP exp_1   | 1717         | Alpha-1-acid glycoprotein 1,2 | NEEYNK_5_4_0_1  | 0.0                                     | 0.0              | 4.0            | 0.0              | 20.3             | 0.0               | 100.0          | 0.0              | 23.1           | 0.0              | 9.9            | 0.0              | 31.8           | 0.0              | None                  |
| 140 | AGP exp_2   | 2848         | Alpha-1-acid glycoprotein 1,2 | NEEYNK_5_4_0_1  | 0.0                                     | 0.0              | 7.1            | 0.0              | 37.8             | 0.0               | 100.0          | 0.0              | 14.8           | 0.0              | 10.7           | 0.0              | 40.0           | 0.0              | None                  |
| 141 | AGP exp_1   | 2822         | Alpha-1-acid glycoprotein 1,2 | NEEYNK_5_4_0_1  | 0.0                                     | 0.0              | 4.4            | 0.0              | 31.9             | 0.0               | 100.0          | 0.0              | 14.9           | 0.0              | 9.1            | 0.0              | 23.7           | 0.0              | None                  |
| 142 | AGP exp_1   | 1937         | Alpha-1-acid glycoprotein 1,2 | NEEYNK_5_4_0_1  | 0.0                                     | 0.0              | 4.7            | 0.0              | 27.1             | 0.0               | 100.0          | 0.0              | 13.1           | 0.0              | 8.6            | 0.0              | 38.3           | 0.0              | None                  |
| 143 | AGP exp_1   | 2122         | Alpha-1-acid glycoprotein 1,2 | NEEYNK_5_4_0_1  | 0.0                                     | 0.0              | 9.7            | 0.0              | 36.5             | 0.0               | 100.0          | 0.0              | 12.6           | 0.0              | 4.6            | 0.0              | 22.9           | 0.0              | None                  |
| 144 | AGP exp_2   | 2130         | Alpha-1-acid glycoprotein 1,2 | NEEYNK_5_4_0_1  | 0.0                                     | 0.0              | 10.2           | 0.0              | 59.3             | 0.0               | 100.0          | 0.0              | 20.8           | 0.0              | 7.4            | 0.0              | 40.6           | 0.0              | None                  |
| 145 | AGP exp_2   | 2280         | Alpha-1-acid glycoprotein 1,2 | NEEYNK_5_4_0_1  | 0.0                                     | 0.0              | 0.0            | 0.0              | 59.8             | 0.0               | 100.0          | 0.0              | 13.3           | 0.0              | 5.9            | 0.0              | 17.7           | 0.0              | None                  |
| 146 | AGP exp_1   | 2709         | Alpha-1-acid glycoprotein 1,2 | NEEYNK_5_4_0_2  | 59.5                                    | 0.0              | 6.0            | 0.0              | 100.0            | 0.0               | 0.0            | 0.0              | 7.1            | 0.0              | 8.3            | 0.0              | 44.4           | 0.0              | None                  |
| 147 | AGP exp_2   | 3443         | Alpha-1-acid glycoprotein 1,2 | NEEYNK_5_4_0_2  | 49.9                                    | 0.0              | 4.6            | 0.0              | 100.0            | 0.0               | 0.0            | 0.0              | 0.0            | 0.0              | 6.2            | 0.0              | 34.9           | 0.0              | None                  |
| 148 | AGP exp_2   | 2710         | Alpha-1-acid glycoprotein 1,2 | NEEYNK_5_4_0_2  | 61.0                                    | 0.0              | 6.3            | 0.0              | 100.0            | 0.0               | 0.0            | 0.0              | 5.1            | 0.0              | 8.6            | 0.0              | 42.5           | 0.0              | None                  |
| 149 | AGP exp_1   | 3310         | Alpha-1-acid glycoprotein 1,2 | NEEYNK_5_4_0_2  | 51.9                                    | 0.0              | 4.9            | 0.0              | 100.0            | 0.0               | 0.0            | 0.0              | 0.0            | 0.0              | 4.9            | 0.0              | 32.0           | 0.0              | None                  |
| 150 | AGP exp_2   | 2806         | Alpha-1-acid glycoprotein 1,2 | NEEYNK_5_4_0_2  | 61.2                                    | 0.0              | 6.1            | 0.0              | 100.0            | 0.0               | 0.0            | 0.0              | 5.1            | 0.0              | 8.2            | 0.0              | 42.8           | 0.0              | None                  |
| 151 | AGP exp_1   | 3042         | Alpha-1-acid glycoprotein 1,2 | NEEYNK_5_4_0_2  | 59.7                                    | 0.0              | 5.0            | 0.0              | 100.0            | 0.0               | 0.0            | 0.0              | 2.7            | 0.0              | 6.6            | 0.0              | 42.4           | 0.0              | None                  |
| 152 | AGP exp_2   | 3146         | Alpha-1-acid glycoprotein 1,2 | NEEYNK_5_4_0_2  | 57.3                                    | 0.0              | 6.3            | 0.0              | 100.0            | 0.0               | 0.0            | 0.0              | 2.8            | 0.0              | 6.0            | 0.0              | 41.2           | 0.0              | None                  |
| 153 | AGP exp_2   | 2545         | Alpha-1-acid glycoprotein 1,2 | NEEYNK_5_4_0_2  | 0.0                                     | 0.0              | 0.0            | 0.0              | 50.8             | 0.0               | 100.0          | 0.0              | 11.3           | 0.0              | 8.3            | 0.0              | 29.3           | 0.0              | None                  |
| 154 | AGP exp_2   | 3159         | Alpha-1-acid glycoprotein 1,2 | NEEYNK_5_4_0_2  | 0.0                                     | 0.0              | 5.7            | 0.0              | 49.8             | 0.0               | 100.0          | 0.0              | 23.3           | 0.0              | 9.6            | 0.0              | 30.4           | 0.0              | None                  |

Supplementary Table 1. Continued.

| No. | Experiments | CID Scan No. | N-glycoproteins               | N-glycopeptides | Relative intensities of B/Y series ions |                  |                |                  |                  |                   |                |                  |                |                  |                |                  |                |                  | Manual Classification |
|-----|-------------|--------------|-------------------------------|-----------------|-----------------------------------------|------------------|----------------|------------------|------------------|-------------------|----------------|------------------|----------------|------------------|----------------|------------------|----------------|------------------|-----------------------|
|     |             |              |                               |                 | B <sub>2</sub>                          | B <sub>2</sub> F | B <sub>3</sub> | B <sub>3</sub> F | B <sub>2</sub> S | B <sub>2</sub> SF | Y <sub>1</sub> | Y <sub>1</sub> F | Y <sub>2</sub> | Y <sub>2</sub> F | Y <sub>3</sub> | Y <sub>3</sub> F | Y <sub>4</sub> | Y <sub>4</sub> F |                       |
| 155 | AGP exp_2   | 2710         | Alpha-1-acid glycoprotein 1,2 | NEEYNK_5_4_0_2  | 61.0                                    | 0.0              | 6.3            | 0.0              | 100.0            | 0.0               | 0.0            | 0.0              | 5.1            | 0.0              | 8.6            | 0.0              | 42.5           | 0.0              | None                  |
| 156 | AGP exp_1   | 3115         | Alpha-1-acid glycoprotein 1,2 | NEEYNK_5_4_0_2  | 0.0                                     | 0.0              | 4.2            | 0.0              | 45.8             | 0.0               | 100.0          | 0.0              | 19.6           | 0.0              | 11.6           | 0.0              | 38.3           | 0.0              | None                  |
| 157 | AGP exp_2   | 4501         | Alpha-1-acid glycoprotein 1,2 | NEEYNK_5_4_0_2  | 0.0                                     | 0.0              | 8.5            | 0.0              | 91.5             | 0.0               | 100.0          | 0.0              | 11.9           | 0.0              | 7.8            | 0.0              | 37.7           | 0.0              | None                  |
| 158 | AGP exp_2   | 3738         | Alpha-1-acid glycoprotein 1,2 | NEEYNK_5_4_0_2  | 63.6                                    | 0.0              | 3.3            | 0.0              | 100.0            | 0.0               | 0.0            | 0.0              | 0.0            | 0.0              | 2.1            | 0.0              | 26.8           | 0.0              | None                  |
| 159 | AGP exp_2   | 3470         | Alpha-1-acid glycoprotein 1,2 | NEEYNK_5_4_0_2  | 0.0                                     | 0.0              | 4.0            | 0.0              | 54.0             | 0.0               | 100.0          | 0.0              | 16.6           | 0.0              | 10.0           | 0.0              | 37.8           | 0.0              | None                  |
| 160 | AGP exp_1   | 3387         | Alpha-1-acid glycoprotein 1,2 | NEEYNK_5_4_0_2  | 0.0                                     | 0.0              | 0.0            | 0.0              | 96.8             | 0.0               | 100.0          | 0.0              | 25.3           | 0.0              | 8.1            | 0.0              | 38.7           | 0.0              | None                  |
| 161 | AGP exp_2   | 3794         | Alpha-1-acid glycoprotein 1,2 | NEEYNK_5_4_0_2  | 0.0                                     | 0.0              | 0.0            | 0.0              | 99.2             | 8.9               | 100.0          | 0.0              | 14.1           | 0.0              | 7.1            | 0.0              | 34.2           | 0.0              | None                  |
| 162 | AGP exp_1   | 2977         | Alpha-1-acid glycoprotein 1,2 | NEEYNK_5_4_1_2  | 58.6                                    | 0.0              | 5.3            | 0.0              | 100.0            | 5.1               | 9.0            | 19.1             | 0.0            | 0.0              | 0.0            | 0.0              | 8.7            | 18.1             | Core                  |
| 163 | AGP exp_2   | 3119         | Alpha-1-acid glycoprotein 1,2 | NEEYNK_5_4_1_2  | 33.3                                    | 0.0              | 0.0            | 0.0              | 100.0            | 0.0               | 12.5           | 25.4             | 0.0            | 0.0              | 0.0            | 0.0              | 4.2            | 22.4             | Core                  |
| 164 | AGP exp_1   | 2420         | Alpha-1-acid glycoprotein 1,2 | NEEYNK_5_4_1_2  | 87.4                                    | 0.0              | 0.0            | 0.0              | 100.0            | 41.8              | 57.7           | 0.0              | 0.0            | 0.0              | 0.0            | 0.0              | 14.3           | 0.0              | Outer                 |
| 165 | AGP exp_2   | 2514         | Alpha-1-acid glycoprotein 1,2 | NEEYNK_5_4_1_2  | 61.9                                    | 0.0              | 0.0            | 0.0              | 100.0            | 27.1              | 47.4           | 0.0              | 0.0            | 0.0              | 0.0            | 0.0              | 14.0           | 0.0              | Outer                 |
| 166 | AGP exp_1   | 2651         | Alpha-1-acid glycoprotein 1,2 | NEEYNK_5_4_1_2  | 57.2                                    | 4.2              | 5.7            | 0.0              | 100.0            | 25.4              | 44.4           | 0.0              | 0.0            | 0.0              | 1.9            | 0.0              | 18.4           | 4.3              | Outer                 |
| 167 | AGP exp_2   | 2787         | Alpha-1-acid glycoprotein 1,2 | NEEYNK_5_4_1_2  | 100.0                                   | 7.8              | 8.3            | 0.0              | 71.6             | 35.4              | 46.2           | 0.0              | 0.0            | 0.0              | 3.3            | 0.0              | 23.5           | 0.0              | Outer                 |
| 168 | AGP exp_19  | 4351         | Alpha-1-acid glycoprotein 1,2 | NEEYNK_5_4_2_2  | 42.8                                    | 14.2             | 14.3           | 0.0              | 100.0            | 43.8              | 47.4           | 12.6             | 0.0            | 0.0              | 0.0            | 0.0              | 9.3            | 17.1             | Dual                  |
| 169 | AGP exp_9   | 4179         | Alpha-1-acid glycoprotein 1,2 | NEEYNK_5_4_2_2  | 57.4                                    | 0.0              | 10.1           | 0.0              | 100.0            | 32.7              | 49.4           | 10.6             | 0.0            | 0.0              | 0.0            | 0.0              | 0.0            | 0.0              | Dual                  |
| 170 | AGP exp_36  | 4733         | Alpha-1-acid glycoprotein 1,2 | NEEYNK_5_4_2_2  | 67.9                                    | 0.0              | 10.8           | 0.0              | 100.0            | 29.5              | 9.0            | 20.2             | 0.0            | 0.0              | 0.0            | 0.0              | 0.0            | 0.0              | Dual                  |
| 171 | AGP exp_22  | 4457         | Alpha-1-acid glycoprotein 1,2 | NEEYNK_5_4_2_2  | 54.5                                    | 16.6             | 0.0            | 0.0              | 100.0            | 33.1              | 26.4           | 30.4             | 0.0            | 0.0              | 0.0            | 0.0              | 6.3            | 10.5             | Dual                  |
| 172 | AGP exp_13  | 4971         | Alpha-1-acid glycoprotein 1,2 | NEEYNK_5_4_2_2  | 67.5                                    | 0.0              | 0.0            | 0.0              | 100.0            | 17.9              | 12.8           | 13.1             | 0.0            | 0.0              | 0.0            | 0.0              | 0.0            | 0.0              | Dual                  |
| 173 | AGP exp_15  | 4698         | Alpha-1-acid glycoprotein 1,2 | NEEYNK_5_4_2_2  | 50.8                                    | 13.5             | 0.0            | 0.0              | 100.0            | 27.6              | 11.9           | 18.3             | 0.0            | 0.0              | 0.0            | 0.0              | 5.7            | 16.7             | Dual                  |
| 174 | AGP exp_20  | 4497         | Alpha-1-acid glycoprotein 1,2 | NEEYNK_5_4_2_2  | 46.0                                    | 0.0              | 0.0            | 0.0              | 100.0            | 16.2              | 25.2           | 18.2             | 0.0            | 0.0              | 0.0            | 0.0              | 3.9            | 0.0              | Dual                  |
| 175 | AGP exp_23  | 4556         | Alpha-1-acid glycoprotein 1,2 | NEEYNK_5_4_2_2  | 59.9                                    | 15.5             | 0.0            | 0.0              | 100.0            | 30.4              | 36.7           | 18.5             | 0.0            | 0.0              | 3.6            | 0.0              | 0.0            | 0.0              | Dual                  |
| 176 | AGP exp_1   | 3630         | Alpha-1-acid glycoprotein 1,2 | NEEYNK_5_5_0_2  | 71.0                                    | 0.0              | 7.0            | 0.0              | 100.0            | 0.0               | 63.8           | 0.0              | 0.0            | 0.0              | 10.8           | 0.0              | 40.0           | 0.0              | None                  |
| 177 | AGP exp_2   | 2140         | Alpha-1-acid glycoprotein 1,2 | NEEYNK_6_5_0_1  | 84.1                                    | 0.0              | 8.0            | 0.0              | 42.7             | 0.0               | 100.0          | 0.0              | 0.0            | 0.0              | 9.1            | 0.0              | 31.5           | 0.0              | None                  |
| 178 | AGP exp_2   | 1970         | Alpha-1-acid glycoprotein 1,2 | NEEYNK_6_5_0_1  | 100.0                                   | 0.0              | 7.2            | 0.0              | 40.7             | 0.0               | 78.7           | 0.0              | 3.3            | 0.0              | 8.4            | 0.0              | 27.3           | 0.0              | None                  |
| 179 | AGP exp_1   | 1919         | Alpha-1-acid glycoprotein 1,2 | NEEYNK_6_5_0_1  | 100.0                                   | 0.0              | 9.2            | 0.0              | 45.9             | 0.0               | 42.0           | 0.0              | 0.0            | 0.0              | 4.0            | 0.0              | 17.5           | 0.0              | None                  |
| 180 | AGP exp_2   | 2289         | Alpha-1-acid glycoprotein 1,2 | NEEYNK_6_5_0_1  | 100.0                                   | 0.0              | 8.0            | 0.0              | 49.2             | 0.0               | 65.1           | 0.0              | 0.0            | 0.0              | 3.0            | 0.0              | 22.3           | 0.0              | None                  |

Supplementary Table 1. Continued.

| No. | Experiments | CID Scan No. | N-glycoproteins               | N-glycopeptides | Relative intensities of B/Y series ions |                  |                |                  |                  |                   |                |                  |                |                  |                |                  |                |                  | Manual Classification |
|-----|-------------|--------------|-------------------------------|-----------------|-----------------------------------------|------------------|----------------|------------------|------------------|-------------------|----------------|------------------|----------------|------------------|----------------|------------------|----------------|------------------|-----------------------|
|     |             |              |                               |                 | B <sub>2</sub>                          | B <sub>2</sub> F | B <sub>3</sub> | B <sub>3</sub> F | B <sub>2</sub> S | B <sub>2</sub> SF | Y <sub>1</sub> | Y <sub>1</sub> F | Y <sub>2</sub> | Y <sub>2</sub> F | Y <sub>3</sub> | Y <sub>3</sub> F | Y <sub>4</sub> | Y <sub>4</sub> F |                       |
| 181 | AGP exp_1   | 2100         | Alpha-1-acid glycoprotein 1,2 | NEEYNK_6_5_0_1  | 89.7                                    | 0.0              | 4.8            | 0.0              | 44.4             | 0.0               | 100.0          | 0.0              | 2.5            | 0.0              | 3.8            | 0.0              | 27.6           | 0.0              | None                  |
| 182 | AGP exp_1   | 2242         | Alpha-1-acid glycoprotein 1,2 | NEEYNK_6_5_0_1  | 100.0                                   | 0.0              | 7.2            | 0.0              | 32.6             | 0.0               | 53.4           | 0.0              | 0.0            | 0.0              | 0.0            | 0.0              | 12.8           | 0.0              | None                  |
| 183 | AGP exp_2   | 1967         | Alpha-1-acid glycoprotein 1,2 | NEEYNK_6_5_0_1  | 100.0                                   | 0.0              | 5.8            | 0.0              | 33.9             | 0.0               | 33.1           | 0.0              | 2.5            | 0.0              | 1.9            | 0.0              | 20.3           | 0.0              | None                  |
| 184 | AGP exp_2   | 2204         | Alpha-1-acid glycoprotein 1,2 | NEEYNK_6_5_0_1  | 0.0                                     | 0.0              | 18.8           | 0.0              | 23.2             | 0.0               | 100.0          | 0.0              | 27.0           | 0.0              | 13.6           | 0.0              | 10.1           | 0.0              | None                  |
| 185 | AGP exp_1   | 2159         | Alpha-1-acid glycoprotein 1,2 | NEEYNK_6_5_0_1  | 0.0                                     | 0.0              | 0.0            | 0.0              | 21.0             | 0.0               | 100.0          | 0.0              | 17.9           | 0.0              | 16.2           | 0.0              | 14.1           | 0.0              | None                  |
| 186 | AGP exp_1   | 1703         | Alpha-1-acid glycoprotein 1,2 | NEEYNK_6_5_0_1  | 100.0                                   | 0.0              | 0.0            | 0.0              | 56.6             | 0.0               | 44.1           | 0.0              | 0.0            | 0.0              | 3.6            | 0.0              | 4.5            | 0.0              | None                  |
| 187 | AGP exp_2   | 3251         | Alpha-1-acid glycoprotein 1,2 | NEEYNK_6_5_0_2  | 69.5                                    | 0.0              | 0.0            | 0.0              | 89.2             | 0.0               | 100.0          | 0.0              | 8.7            | 0.0              | 13.5           | 0.0              | 41.9           | 0.0              | None                  |
| 188 | AGP exp_1   | 3403         | Alpha-1-acid glycoprotein 1,2 | NEEYNK_6_5_0_2  | 73.0                                    | 0.0              | 6.0            | 0.0              | 86.9             | 0.0               | 100.0          | 0.0              | 8.0            | 0.0              | 10.7           | 0.0              | 37.4           | 0.0              | None                  |
| 189 | AGP exp_2   | 3713         | Alpha-1-acid glycoprotein 1,2 | NEEYNK_6_5_0_2  | 0.0                                     | 0.0              | 0.0            | 0.0              | 38.7             | 0.0               | 100.0          | 0.0              | 21.2           | 0.0              | 10.8           | 0.0              | 20.9           | 0.0              | None                  |
| 190 | AGP exp_2   | 3572         | Alpha-1-acid glycoprotein 1,2 | NEEYNK_6_5_0_2  | 71.1                                    | 0.0              | 6.5            | 0.0              | 100.0            | 0.0               | 87.8           | 0.0              | 5.8            | 0.0              | 7.2            | 0.0              | 42.3           | 0.0              | None                  |
| 191 | AGP exp_1   | 3672         | Alpha-1-acid glycoprotein 1,2 | NEEYNK_6_5_0_2  | 48.6                                    | 0.0              | 4.4            | 0.0              | 70.9             | 0.0               | 100.0          | 0.0              | 7.1            | 0.0              | 8.7            | 0.0              | 31.1           | 0.0              | None                  |
| 192 | AGP exp_1   | 3157         | Alpha-1-acid glycoprotein 1,2 | NEEYNK_6_5_0_2  | 54.6                                    | 0.0              | 4.6            | 0.0              | 65.0             | 0.0               | 100.0          | 0.0              | 6.4            | 0.0              | 10.2           | 0.0              | 31.6           | 0.0              | None                  |
| 193 | AGP exp_1   | 2840         | Alpha-1-acid glycoprotein 1,2 | NEEYNK_6_5_0_2  | 68.5                                    | 0.0              | 6.2            | 0.0              | 100.0            | 0.0               | 84.3           | 0.0              | 5.9            | 0.0              | 5.1            | 0.0              | 29.7           | 0.0              | None                  |
| 194 | AGP exp_2   | 3880         | Alpha-1-acid glycoprotein 1,2 | NEEYNK_6_5_0_2  | 56.8                                    | 0.0              | 4.9            | 0.0              | 100.0            | 0.0               | 80.2           | 0.0              | 4.3            | 0.0              | 7.1            | 0.0              | 31.9           | 0.0              | None                  |
| 195 | AGP exp_2   | 2944         | Alpha-1-acid glycoprotein 1,2 | NEEYNK_6_5_0_2  | 69.4                                    | 0.0              | 0.0            | 0.0              | 96.5             | 0.0               | 100.0          | 0.0              | 0.0            | 0.0              | 6.0            | 0.0              | 22.9           | 0.0              | None                  |
| 196 | AGP exp_2   | 3063         | Alpha-1-acid glycoprotein 1,2 | NEEYNK_6_5_0_2  | 0.0                                     | 0.0              | 0.0            | 0.0              | 33.1             | 0.0               | 100.0          | 0.0              | 19.8           | 0.0              | 11.4           | 0.0              | 23.4           | 0.0              | None                  |
| 197 | AGP exp_1   | 3976         | Alpha-1-acid glycoprotein 1,2 | NEEYNK_6_5_0_2  | 69.8                                    | 0.0              | 0.0            | 0.0              | 100.0            | 0.0               | 52.9           | 0.0              | 2.3            | 0.0              | 0.0            | 0.0              | 12.8           | 0.0              | None                  |
| 198 | AGP exp_2   | 4584         | Alpha-1-acid glycoprotein 1,2 | NEEYNK_6_5_0_3  | 22.9                                    | 0.0              | 3.3            | 0.0              | 78.8             | 0.0               | 100.0          | 0.0              | 7.1            | 0.0              | 11.1           | 0.0              | 40.7           | 0.0              | None                  |
| 199 | AGP exp_1   | 4491         | Alpha-1-acid glycoprotein 1,2 | NEEYNK_6_5_0_3  | 29.0                                    | 0.0              | 4.2            | 0.0              | 100.0            | 0.0               | 89.0           | 0.0              | 7.6            | 0.0              | 12.5           | 0.0              | 42.7           | 0.0              | None                  |
| 200 | AGP exp_2   | 2086         | Alpha-1-acid glycoprotein 1,2 | NEEYNK_6_5_1_1  | 100.0                                   | 26.6             | 9.1            | 0.0              | 38.4             | 14.3              | 90.4           | 0.0              | 0.0            | 0.0              | 6.4            | 0.0              | 26.6           | 0.0              | Outer                 |
| 201 | AGP exp_1   | 2075         | Alpha-1-acid glycoprotein 1,2 | NEEYNK_6_5_1_1  | 88.2                                    | 16.0             | 6.5            | 0.0              | 33.3             | 12.9              | 100.0          | 0.0              | 0.0            | 0.0              | 9.2            | 0.0              | 28.6           | 0.0              | Outer                 |
| 202 | AGP exp_1   | 1898         | Alpha-1-acid glycoprotein 1,2 | NEEYNK_6_5_1_1  | 100.0                                   | 19.2             | 0.0            | 0.0              | 39.8             | 0.0               | 60.2           | 0.0              | 0.0            | 0.0              | 9.5            | 0.0              | 24.9           | 0.0              | Outer                 |
| 203 | AGP exp_1   | 1677         | Alpha-1-acid glycoprotein 1,2 | NEEYNK_6_5_1_1  | 100.0                                   | 18.8             | 0.0            | 0.0              | 35.8             | 0.0               | 48.9           | 0.0              | 0.0            | 0.0              | 0.0            | 0.0              | 8.6            | 0.0              | Outer                 |
| 204 | AGP exp_2   | 1705         | Alpha-1-acid glycoprotein 1,2 | NEEYNK_6_5_1_1  | 100.0                                   | 27.1             | 0.0            | 0.0              | 64.8             | 0.0               | 73.4           | 0.0              | 0.0            | 0.0              | 0.0            | 0.0              | 12.8           | 0.0              | Outer                 |
| 205 | AGP exp_1   | 2780         | Alpha-1-acid glycoprotein 1,2 | NEEYNK_6_5_1_2  | 50.0                                    | 14.1             | 0.0            | 0.0              | 68.3             | 22.1              | 100.0          | 0.0              | 0.0            | 0.0              | 11.8           | 0.0              | 39.3           | 0.0              | Outer                 |
| 206 | AGP exp_1   | 2462         | Alpha-1-acid glycoprotein 1,2 | NEEYNK_6_5_1_2  | 70.2                                    | 35.5             | 0.0            | 0.0              | 100.0            | 0.0               | 84.7           | 0.0              | 0.0            | 0.0              | 0.0            | 0.0              | 26.3           | 0.0              | Outer                 |

Supplementary Table 1. Continued.

| No. | Experiments | CID Scan No. | N-glycoproteins               | N-glycopeptides | Relative intensities of B/Y series ions |                  |                |                  |                  |                   |                |                  |                |                  |                |                  |                |                  | Manual Classification |
|-----|-------------|--------------|-------------------------------|-----------------|-----------------------------------------|------------------|----------------|------------------|------------------|-------------------|----------------|------------------|----------------|------------------|----------------|------------------|----------------|------------------|-----------------------|
|     |             |              |                               |                 | B <sub>2</sub>                          | B <sub>2</sub> F | B <sub>3</sub> | B <sub>3</sub> F | B <sub>2</sub> S | B <sub>2</sub> SF | Y <sub>1</sub> | Y <sub>1</sub> F | Y <sub>2</sub> | Y <sub>2</sub> F | Y <sub>3</sub> | Y <sub>3</sub> F | Y <sub>4</sub> | Y <sub>4</sub> F |                       |
| 207 | AGP exp_1   | 3578         | Alpha-1-acid glycoprotein 1,2 | NEEYNK_6_5_1_2  | 52.7                                    | 12.8             | 4.3            | 0.0              | 80.0             | 31.6              | 100.0          | 4.0              | 0.0            | 0.0              | 8.9            | 0.0              | 35.3           | 5.0              | Outer                 |
| 208 | AGP exp_2   | 2852         | Alpha-1-acid glycoprotein 1,2 | NEEYNK_6_5_1_2  | 47.5                                    | 14.2             | 0.0            | 0.0              | 81.8             | 21.9              | 100.0          | 0.0              | 0.0            | 0.0              | 7.9            | 0.0              | 37.8           | 0.0              | Outer                 |
| 209 | AGP exp_2   | 3164         | Alpha-1-acid glycoprotein 1,2 | NEEYNK_6_5_1_2  | 54.1                                    | 10.4             | 5.6            | 0.0              | 76.8             | 20.0              | 100.0          | 0.0              | 0.0            | 0.0              | 2.8            | 0.0              | 26.2           | 0.0              | Outer                 |
| 210 | AGP exp_1   | 3070         | Alpha-1-acid glycoprotein 1,2 | NEEYNK_6_5_1_2  | 34.6                                    | 9.2              | 0.0            | 0.0              | 100.0            | 26.0              | 95.8           | 0.0              | 0.0            | 0.0              | 0.0            | 0.0              | 22.3           | 0.0              | Outer                 |
| 211 | AGP exp_2   | 3788         | Alpha-1-acid glycoprotein 1,2 | NEEYNK_6_5_1_2  | 66.4                                    | 0.0              | 0.0            | 0.0              | 100.0            | 29.5              | 83.7           | 0.0              | 0.0            | 0.0              | 3.4            | 0.0              | 18.8           | 0.0              | Outer                 |
| 212 | AGP exp_1   | 4387         | Alpha-1-acid glycoprotein 1,2 | NEEYNK_6_5_1_3  | 15.5                                    | 5.7              | 3.2            | 0.0              | 91.1             | 30.6              | 100.0          | 0.0              | 0.0            | 0.0              | 12.7           | 0.0              | 41.6           | 2.4              | Outer                 |
| 213 | AGP exp_2   | 4474         | Alpha-1-acid glycoprotein 1,2 | NEEYNK_6_5_1_3  | 13.8                                    | 4.5              | 0.0            | 0.0              | 72.2             | 24.6              | 100.0          | 0.0              | 0.0            | 0.0              | 10.1           | 0.0              | 34.6           | 0.0              | Outer                 |
| 214 | AGP exp_25  | 3991         | Alpha-1-acid glycoprotein 1,2 | NEEYNK_6_5_2_2  | 42.6                                    | 31.4             | 0.0            | 0.0              | 74.7             | 48.0              | 100.0          | 0.0              | 6.3            | 0.0              | 0.0            | 0.0              | 29.2           | 9.9              | Dual                  |
| 215 | AGP exp_34  | 3654         | Alpha-1-acid glycoprotein 1,2 | NEEYNK_6_5_2_2  | 65.2                                    | 14.9             | 0.0            | 0.0              | 100.0            | 19.9              | 43.5           | 12.9             | 0.0            | 0.0              | 0.0            | 0.0              | 11.1           | 11.1             | Dual                  |
| 216 | AGP exp_27  | 4318         | Alpha-1-acid glycoprotein 1,2 | NEEYNK_6_5_2_2  | 64.8                                    | 23.0             | 0.0            | 0.0              | 100.0            | 47.3              | 44.7           | 13.9             | 0.0            | 0.0              | 0.0            | 0.0              | 12.1           | 12.0             | Dual                  |
| 217 | AGP exp_45  | 5124         | Alpha-1-acid glycoprotein 1,2 | NEEYNK_6_5_2_2  | 72.9                                    | 0.0              | 0.0            | 0.0              | 100.0            | 21.4              | 16.1           | 12.0             | 0.0            | 0.0              | 0.0            | 0.0              | 0.0            | 0.0              | Dual                  |
| 218 | AGP exp_9   | 3879         | Alpha-1-acid glycoprotein 1,2 | NEEYNK_6_5_2_2  | 54.5                                    | 28.1             | 0.0            | 0.0              | 100.0            | 21.7              | 30.6           | 17.8             | 3.6            | 0.0              | 0.0            | 0.0              | 0.0            | 0.0              | Dual                  |
| 219 | AGP exp_28  | 4570         | Alpha-1-acid glycoprotein 1,2 | NEEYNK_6_5_2_2  | 56.5                                    | 0.0              | 0.0            | 0.0              | 100.0            | 28.1              | 26.4           | 28.4             | 0.0            | 0.0              | 0.0            | 0.0              | 0.0            | 0.0              | Dual                  |
| 220 | AGP exp_37  | 5184         | Alpha-1-acid glycoprotein 1,2 | NEEYNK_6_5_2_2  | 38.8                                    | 0.0              | 8.7            | 0.0              | 100.0            | 30.8              | 42.5           | 24.9             | 0.0            | 0.0              | 0.0            | 0.0              | 0.0            | 0.0              | Dual                  |
| 221 | AGP exp_37  | 8937         | Alpha-1-acid glycoprotein 1,2 | NEEYNK_6_5_2_3  | 0.0                                     | 8.6              | 0.0            | 0.0              | 100.0            | 59.7              | 86.9           | 11.6             | 8.2            | 0.0              | 7.4            | 0.0              | 33.3           | 16.3             | Dual                  |
| 222 | AGP exp_8   | 7429         | Alpha-1-acid glycoprotein 1,2 | NEEYNK_6_5_2_3  | 0.0                                     | 8.2              | 0.0            | 0.0              | 100.0            | 48.7              | 70.0           | 18.6             | 0.0            | 0.0              | 8.6            | 0.0              | 27.9           | 19.2             | Dual                  |
| 223 | AGP exp_44  | 7860         | Alpha-1-acid glycoprotein 1,2 | NEEYNK_6_5_2_3  | 0.0                                     | 9.1              | 0.0            | 0.0              | 100.0            | 55.4              | 80.0           | 16.7             | 1.9            | 0.0              | 7.7            | 0.0              | 38.6           | 23.3             | Dual                  |
| 224 | AGP exp_7   | 5921         | Alpha-1-acid glycoprotein 1,2 | NEEYNK_6_5_2_3  | 2.3                                     | 8.3              | 4.5            | 0.0              | 100.0            | 40.8              | 61.2           | 25.5             | 0.0            | 0.0              | 7.1            | 0.0              | 27.9           | 21.3             | Dual                  |
| 225 | AGP exp_20  | 8454         | Alpha-1-acid glycoprotein 1,2 | NEEYNK_6_5_2_3  | 0.0                                     | 8.5              | 0.0            | 0.0              | 100.0            | 48.1              | 65.8           | 19.3             | 0.0            | 0.0              | 10.9           | 0.0              | 34.8           | 19.0             | Dual                  |
| 226 | AGP exp_1   | 4426         | Alpha-1-acid glycoprotein 1,2 | NEEYNK_6_5_2_3  | 0.0                                     | 9.5              | 0.0            | 0.0              | 100.0            | 48.9              | 91.1           | 2.7              | 6.9            | 0.0              | 2.7            | 0.0              | 39.4           | 8.5              | Dual                  |
| 227 | AGP exp_34  | 6967         | Alpha-1-acid glycoprotein 1,2 | NEEYNK_6_5_2_3  | 0.0                                     | 9.8              | 5.0            | 0.0              | 100.0            | 57.1              | 90.2           | 7.9              | 0.0            | 0.0              | 9.6            | 0.0              | 35.7           | 13.0             | Dual                  |
| 228 | AGP exp_36  | 8720         | Alpha-1-acid glycoprotein 1,2 | NEEYNK_6_5_2_3  | 0.0                                     | 11.7             | 0.0            | 0.0              | 100.0            | 52.7              | 76.0           | 22.3             | 0.0            | 0.0              | 9.8            | 0.0              | 37.6           | 18.0             | Dual                  |
| 229 | AGP exp_33  | 6963         | Alpha-1-acid glycoprotein 1,2 | NEEYNK_6_5_2_3  | 0.0                                     | 11.9             | 0.0            | 0.0              | 100.0            | 53.3              | 80.3           | 4.4              | 0.0            | 0.0              | 11.1           | 0.0              | 35.2           | 11.4             | Dual                  |
| 230 | AGP exp_17  | 8293         | Alpha-1-acid glycoprotein 1,2 | NEEYNK_6_5_2_3  | 0.0                                     | 8.0              | 0.0            | 0.0              | 100.0            | 46.6              | 73.5           | 11.8             | 0.0            | 0.0              | 6.0            | 0.0              | 31.5           | 13.3             | Dual                  |
| 231 | AGP exp_9   | 7529         | Alpha-1-acid glycoprotein 1,2 | NEEYNK_6_5_2_3  | 0.0                                     | 10.8             | 0.0            | 0.0              | 100.0            | 42.8              | 73.2           | 11.8             | 8.5            | 0.0              | 8.4            | 0.0              | 27.2           | 15.3             | Dual                  |
| 232 | AGP exp_42  | 8943         | Alpha-1-acid glycoprotein 1,2 | NEEYNK_6_5_2_3  | 0.0                                     | 7.2              | 0.0            | 0.0              | 100.0            | 44.5              | 98.2           | 11.1             | 0.0            | 0.0              | 3.6            | 0.0              | 29.1           | 13.4             | Dual                  |

Supplementary Table 1. Continued.

| No. | Experiments | CID Scan No. | N-glycoproteins               | N-glycopeptides            | Relative intensities of B/Y series ions |                  |                |                  |                  |                   |                |                  |                |                  |                |                  |                |                  | Manual Classification |
|-----|-------------|--------------|-------------------------------|----------------------------|-----------------------------------------|------------------|----------------|------------------|------------------|-------------------|----------------|------------------|----------------|------------------|----------------|------------------|----------------|------------------|-----------------------|
|     |             |              |                               |                            | B <sub>2</sub>                          | B <sub>2</sub> F | B <sub>3</sub> | B <sub>3</sub> F | B <sub>2</sub> S | B <sub>2</sub> SF | Y <sub>1</sub> | Y <sub>1</sub> F | Y <sub>2</sub> | Y <sub>2</sub> F | Y <sub>3</sub> | Y <sub>3</sub> F | Y <sub>4</sub> | Y <sub>4</sub> F |                       |
| 233 | AGP exp_28  | 8807         | Alpha-1-acid glycoprotein 1,2 | NEEYNK_6_5_2_3             | 0.0                                     | 8.1              | 0.0            | 0.0              | 100.0            | 43.7              | 81.6           | 8.3              | 0.0            | 0.0              | 5.8            | 0.0              | 27.5           | 7.1              | Dual                  |
| 234 | AGP exp_2   | 4447         | Alpha-1-acid glycoprotein 1,2 | NEEYNK_6_5_2_3             | 0.0                                     | 6.1              | 6.5            | 0.0              | 100.0            | 51.9              | 83.0           | 0.0              | 0.0            | 0.0              | 4.8            | 0.0              | 20.3           | 4.8              | Dual                  |
| 235 | AGP exp_28  | 8651         | Alpha-1-acid glycoprotein 1,2 | NEEYNK_6_5_2_3             | 0.0                                     | 4.5              | 0.0            | 0.0              | 100.0            | 35.0              | 38.9           | 12.2             | 0.0            | 0.0              | 0.0            | 0.0              | 24.4           | 4.9              | Dual                  |
| 236 | AGP exp_15  | 9766         | Alpha-1-acid glycoprotein 1,2 | NEEYNK_6_5_2_3             | 0.0                                     | 0.0              | 0.0            | 0.0              | 100.0            | 22.3              | 39.5           | 15.8             | 3.5            | 0.0              | 2.0            | 0.0              | 7.9            | 9.2              | Dual                  |
| 237 | AGP exp_14  | 9919         | Alpha-1-acid glycoprotein 1,2 | NEEYNK_6_5_2_3             | 0.0                                     | 0.0              | 3.4            | 0.0              | 100.0            | 20.9              | 41.1           | 14.7             | 1.6            | 0.0              | 2.5            | 2.2              | 8.5            | 12.6             | Dual                  |
| 238 | AGP exp_16  | 9944         | Alpha-1-acid glycoprotein 1,2 | NEEYNK_6_5_2_3             | 5.0                                     | 6.7              | 0.0            | 0.0              | 100.0            | 15.7              | 41.1           | 14.1             | 4.3            | 0.0              | 2.6            | 0.0              | 11.3           | 0.0              | Dual                  |
| 239 | AGP exp_1   | 4393         | Alpha-1-acid glycoprotein 1,2 | NEEYNK_6_5_3_1             | 66.4                                    | 20.2             | 5.7            | 0.0              | 95.8             | 25.5              | 100.0          | 0.0              | 14.9           | 0.0              | 2.2            | 0.0              | 27.8           | 0.0              | Outer                 |
| 240 | AGP exp_1   | 25092        | Alpha-1-acid glycoprotein 1,2 | SVQEIQAATFFYFTPKNK_6_5_0_3 | 0.0                                     | 0.0              | 5.9            | 0.0              | 100.0            | 0.0               | 15.7           | 0.0              | 0.0            | 0.0              | 4.6            | 0.0              | 10.7           | 0.0              | None                  |
| 241 | AGP exp_1   | 2081         | Alpha-1-acid glycoprotein 2   | ENGTVSR_5_4_0_2            | 84.5                                    | 0.0              | 7.1            | 0.0              | 100.0            | 0.0               | 21.4           | 0.0              | 0.0            | 0.0              | 0.0            | 0.0              | 13.9           | 0.0              | None                  |
| 242 | AGP exp_2   | 1631         | Alpha-1-acid glycoprotein 2   | ENGTVSR_6_5_0_1            | 100.0                                   | 0.0              | 7.5            | 0.0              | 35.0             | 0.0               | 43.7           | 0.0              | 0.0            | 0.0              | 0.0            | 0.0              | 14.5           | 0.0              | None                  |
| 243 | AGP exp_1   | 2325         | Alpha-1-acid glycoprotein 2   | ENGTVSR_6_5_0_2            | 79.0                                    | 0.0              | 0.0            | 0.0              | 100.0            | 0.0               | 52.1           | 0.0              | 4.7            | 0.0              | 0.0            | 0.0              | 44.9           | 0.0              | None                  |
| 244 | AGP exp_2   | 2363         | Alpha-1-acid glycoprotein 2   | ENGTVSR_6_5_0_2            | 90.0                                    | 0.0              | 0.0            | 0.0              | 100.0            | 0.0               | 93.0           | 0.0              | 8.8            | 0.0              | 8.9            | 0.0              | 32.0           | 0.0              | None                  |
| 245 | AGP exp_1   | 2200         | Alpha-1-acid glycoprotein 2   | ENGTVSR_6_5_0_2            | 72.3                                    | 0.0              | 0.0            | 0.0              | 89.8             | 0.0               | 100.0          | 0.0              | 3.8            | 0.0              | 6.1            | 0.0              | 39.2           | 0.0              | None                  |
| 246 | AGP exp_1   | 2417         | Alpha-1-acid glycoprotein 2   | ENGTVSR_6_5_0_2            | 65.1                                    | 0.0              | 0.0            | 0.0              | 100.0            | 0.0               | 95.7           | 0.0              | 3.1            | 0.0              | 4.5            | 0.0              | 23.7           | 0.0              | None                  |
| 247 | AGP exp_2   | 4012         | Alpha-1-acid glycoprotein 2   | ENGTVSR_6_5_0_3            | 26.7                                    | 0.0              | 0.0            | 0.0              | 100.0            | 0.0               | 93.5           | 0.0              | 5.0            | 0.0              | 11.8           | 0.0              | 47.1           | 0.0              | None                  |
| 248 | AGP exp_1   | 3871         | Alpha-1-acid glycoprotein 2   | ENGTVSR_6_5_0_3            | 26.7                                    | 0.0              | 0.0            | 0.0              | 100.0            | 0.0               | 69.1           | 0.0              | 4.4            | 0.0              | 11.8           | 0.0              | 62.7           | 0.0              | None                  |
| 249 | AGP exp_1   | 4149         | Alpha-1-acid glycoprotein 2   | ENGTVSR_6_5_0_3            | 28.8                                    | 0.0              | 4.9            | 0.0              | 100.0            | 0.0               | 54.7           | 0.0              | 1.8            | 0.0              | 7.7            | 0.0              | 41.7           | 0.0              | None                  |
| 250 | AGP exp_2   | 1588         | Alpha-1-acid glycoprotein 2   | ENGTVSR_6_5_1_1            | 100.0                                   | 34.6             | 0.0            | 0.0              | 58.8             | 0.0               | 63.7           | 0.0              | 0.0            | 0.0              | 0.0            | 0.0              | 17.1           | 0.0              | Outer                 |
| 251 | AGP exp_2   | 2426         | Alpha-1-acid glycoprotein 2   | ENGTVSR_6_5_1_2            | 60.3                                    | 15.1             | 0.0            | 0.0              | 100.0            | 45.7              | 70.3           | 0.0              | 0.0            | 0.0              | 0.0            | 0.0              | 26.2           | 0.0              | Outer                 |
| 252 | AGP exp_1   | 2302         | Alpha-1-acid glycoprotein 2   | ENGTVSR_6_5_1_2            | 89.0                                    | 27.1             | 0.0            | 0.0              | 100.0            | 35.7              | 73.9           | 0.0              | 0.0            | 0.0              | 0.0            | 0.0              | 0.0            | 0.0              | Outer                 |
| 253 | AGP exp_2   | 3847         | Alpha-1-acid glycoprotein 2   | ENGTVSR_6_5_1_3            | 20.3                                    | 4.5              | 4.3            | 0.0              | 98.2             | 33.0              | 100.0          | 0.0              | 7.9            | 0.0              | 9.4            | 0.0              | 45.1           | 2.0              | Outer                 |
| 254 | AGP exp_1   | 3758         | Alpha-1-acid glycoprotein 2   | ENGTVSR_6_5_1_3            | 15.9                                    | 2.9              | 3.2            | 0.0              | 72.4             | 23.2              | 100.0          | 0.0              | 3.5            | 0.0              | 0.0            | 0.0              | 36.2           | 2.1              | Outer                 |
| 255 | AGP exp_1   | 4042         | Alpha-1-acid glycoprotein 2   | ENGTVSR_6_5_1_3            | 24.0                                    | 13.0             | 0.0            | 0.0              | 100.0            | 24.4              | 44.0           | 0.0              | 5.4            | 0.0              | 0.0            | 0.0              | 44.3           | 0.0              | Outer                 |
| 256 | AGP exp_28  | 6954         | Alpha-1-acid glycoprotein 2   | ENGTVSR_6_5_2_3            | 6.2                                     | 8.6              | 0.0            | 0.0              | 100.0            | 61.6              | 67.7           | 0.0              | 0.0            | 0.0              | 6.4            | 0.0              | 35.2           | 9.1              | Dual                  |
| 257 | AGP exp_26  | 7051         | Alpha-1-acid glycoprotein 2   | ENGTVSR_6_5_2_3            | 8.8                                     | 12.5             | 0.0            | 0.0              | 100.0            | 74.9              | 81.9           | 0.0              | 0.0            | 0.0              | 0.0            | 0.0              | 52.4           | 14.0             | Dual                  |
| 258 | AGP exp_36  | 7102         | Alpha-1-acid glycoprotein 2   | ENGTVSR_6_5_2_3            | 7.6                                     | 11.3             | 0.0            | 0.0              | 100.0            | 64.8              | 90.4           | 0.0              | 0.0            | 0.0              | 8.7            | 0.0              | 34.0           | 12.1             | Dual                  |

Supplementary Table 1. Continued.

| No. | Experiments | CID Scan No. | N-glycoproteins             | N-glycopeptides       | Relative intensities of B/Y series ions |                  |                |                  |                  |                   |                |                  |                |                  |                |                  |                |                  | Manual Classification |
|-----|-------------|--------------|-----------------------------|-----------------------|-----------------------------------------|------------------|----------------|------------------|------------------|-------------------|----------------|------------------|----------------|------------------|----------------|------------------|----------------|------------------|-----------------------|
|     |             |              |                             |                       | B <sub>2</sub>                          | B <sub>2</sub> F | B <sub>3</sub> | B <sub>3</sub> F | B <sub>2</sub> S | B <sub>2</sub> SF | Y <sub>1</sub> | Y <sub>1</sub> F | Y <sub>2</sub> | Y <sub>2</sub> F | Y <sub>3</sub> | Y <sub>3</sub> F | Y <sub>4</sub> | Y <sub>4</sub> F |                       |
| 259 | AGP exp_27  | 6629         | Alpha-1-acid glycoprotein 2 | ENGTVSR_6_5_2_3       | 6.9                                     | 10.7             | 0.0            | 0.0              | 100.0            | 64.6              | 72.2           | 0.0              | 3.7            | 0.0              | 8.1            | 0.0              | 44.3           | 13.1             | Dual                  |
| 260 | AGP exp_22  | 6653         | Alpha-1-acid glycoprotein 2 | ENGTVSR_6_5_2_3       | 8.9                                     | 8.2              | 0.0            | 0.0              | 92.9             | 56.5              | 100.0          | 0.0              | 3.3            | 0.0              | 6.8            | 0.0              | 43.2           | 9.3              | Dual                  |
| 261 | AGP exp_14  | 7628         | Alpha-1-acid glycoprotein 2 | ENGTVSR_6_5_2_3       | 0.0                                     | 0.0              | 0.0            | 0.0              | 100.0            | 30.8              | 41.7           | 0.0              | 0.0            | 0.0              | 0.0            | 0.0              | 13.8           | 10.0             | Dual                  |
| 262 | AGP exp_5   | 6180         | Alpha-1-acid glycoprotein 2 | ENGTVSR_6_5_2_3       | 8.6                                     | 10.6             | 0.0            | 0.0              | 100.0            | 55.4              | 70.9           | 0.0              | 0.0            | 0.0              | 0.0            | 0.0              | 44.4           | 15.0             | Dual                  |
| 263 | AGP exp_2   | 1493         | Alpha-1-acid glycoprotein 2 | ENGTVSR_7_6_1_1       | 93.1                                    | 30.1             | 0.0            | 0.0              | 43.5             | 31.1              | 100.0          | 0.0              | 0.0            | 0.0              | 0.0            | 0.0              | 0.0            | 0.0              | Outer                 |
| 264 | AGP exp_1   | 2034         | Alpha-1-acid glycoprotein 2 | ENGTVSR_7_6_1_2       | 25.5                                    | 16.1             | 0.0            | 0.0              | 100.0            | 10.3              | 65.3           | 0.0              | 0.0            | 0.0              | 0.0            | 0.0              | 0.0            | 0.0              | Outer                 |
| 265 | AGP exp_2   | 2068         | Alpha-1-acid glycoprotein 2 | ENGTVSR_7_6_1_2       | 25.8                                    | 21.3             | 0.0            | 0.0              | 100.0            | 22.8              | 60.4           | 0.0              | 0.0            | 0.0              | 0.0            | 0.0              | 0.0            | 0.0              | Outer                 |
| 266 | AGP exp_1   | 2173         | Alpha-1-acid glycoprotein 2 | ENGTVSR_7_6_1_2       | 23.2                                    | 13.3             | 0.0            | 0.0              | 100.0            | 34.6              | 58.0           | 0.0              | 0.0            | 0.0              | 0.0            | 0.0              | 0.0            | 0.0              | Outer                 |
| 267 | AGP exp_2   | 5011         | Alpha-1-acid glycoprotein 2 | ENGTVSR_7_6_1_4       | 33.0                                    | 0.0              | 0.0            | 0.0              | 100.0            | 22.7              | 11.3           | 0.0              | 0.0            | 0.0              | 0.0            | 0.0              | 2.6            | 0.0              | Outer                 |
| 268 | AGP exp_1   | 5112         | Alpha-1-acid glycoprotein 2 | ENGTVSR_7_6_1_4       | 32.6                                    | 0.0              | 4.3            | 0.0              | 100.0            | 25.2              | 11.7           | 0.0              | 0.0            | 0.0              | 0.0            | 0.0              | 3.3            | 0.0              | Outer                 |
| 269 | AGP exp_1   | 14653        | Alpha-1-acid glycoprotein 2 | LVPVPITNATLDR_3_3_0_0 | 6.6                                     | 0.0              | 3.9            | 0.0              | 0.0              | 0.0               | 100.0          | 0.0              | 1.8            | 0.0              | 24.1           | 0.0              | 26.6           | 0.0              | None                  |
| 270 | AGP exp_2   | 15353        | Alpha-1-acid glycoprotein 2 | LVPVPITNATLDR_3_3_0_0 | 8.8                                     | 0.0              | 4.0            | 0.0              | 0.0              | 0.0               | 100.0          | 0.0              | 6.1            | 0.0              | 33.2           | 0.0              | 37.8           | 0.0              | None                  |
| 271 | AGP exp_2   | 15433        | Alpha-1-acid glycoprotein 2 | LVPVPITNATLDR_3_3_0_0 | 8.0                                     | 0.0              | 4.5            | 0.0              | 0.0              | 0.0               | 100.0          | 0.0              | 4.0            | 0.0              | 34.6           | 0.0              | 39.4           | 0.0              | None                  |
| 272 | AGP exp_1   | 14732        | Alpha-1-acid glycoprotein 2 | LVPVPITNATLDR_3_3_0_0 | 6.8                                     | 0.0              | 4.1            | 0.0              | 0.0              | 0.0               | 100.0          | 0.0              | 3.3            | 0.0              | 30.4           | 0.0              | 34.9           | 0.0              | None                  |
| 273 | AGP exp_2   | 12253        | Alpha-1-acid glycoprotein 2 | LVPVPITNATLDR_4_4_0_1 | 63.4                                    | 0.0              | 0.0            | 0.0              | 100.0            | 0.0               | 44.7           | 0.0              | 12.7           | 0.0              | 0.0            | 0.0              | 29.7           | 0.0              | None                  |
| 274 | AGP exp_1   | 14693        | Alpha-1-acid glycoprotein 2 | LVPVPITNATLDR_5_4_0_1 | 0.0                                     | 0.0              | 0.0            | 0.0              | 4.9              | 0.0               | 100.0          | 0.0              | 10.5           | 0.0              | 8.6            | 0.0              | 13.7           | 0.0              | None                  |
| 275 | AGP exp_2   | 15498        | Alpha-1-acid glycoprotein 2 | LVPVPITNATLDR_5_4_0_1 | 0.0                                     | 0.0              | 4.5            | 0.0              | 5.1              | 0.0               | 100.0          | 0.0              | 15.2           | 0.0              | 7.3            | 0.0              | 17.3           | 0.0              | None                  |
| 276 | AGP exp_2   | 15349        | Alpha-1-acid glycoprotein 2 | LVPVPITNATLDR_5_4_0_1 | 51.9                                    | 0.0              | 0.0            | 0.0              | 100.0            | 0.0               | 23.1           | 0.0              | 12.4           | 0.0              | 0.0            | 0.0              | 60.8           | 0.0              | None                  |
| 277 | AGP exp_2   | 12062        | Alpha-1-acid glycoprotein 2 | LVPVPITNATLDR_5_4_0_1 | 83.6                                    | 0.0              | 9.3            | 0.0              | 48.1             | 0.0               | 26.8           | 0.0              | 0.0            | 0.0              | 9.3            | 0.0              | 100.0          | 0.0              | None                  |
| 278 | AGP exp_1   | 15375        | Alpha-1-acid glycoprotein 2 | LVPVPITNATLDR_5_4_0_2 | 29.2                                    | 0.0              | 0.0            | 0.0              | 100.0            | 0.0               | 56.6           | 0.0              | 0.0            | 0.0              | 11.7           | 0.0              | 52.6           | 0.0              | None                  |
| 279 | AGP exp_2   | 15598        | Alpha-1-acid glycoprotein 2 | LVPVPITNATLDR_5_4_0_2 | 0.0                                     | 0.0              | 0.0            | 0.0              | 9.0              | 0.0               | 100.0          | 0.0              | 8.2            | 0.0              | 6.5            | 0.0              | 8.8            | 0.0              | None                  |
| 280 | AGP exp_1   | 15027        | Alpha-1-acid glycoprotein 2 | LVPVPITNATLDR_5_4_0_2 | 72.9                                    | 0.0              | 5.9            | 0.0              | 100.0            | 0.0               | 33.2           | 0.0              | 0.0            | 0.0              | 8.5            | 0.0              | 78.3           | 0.0              | None                  |
| 281 | AGP exp_1   | 15062        | Alpha-1-acid glycoprotein 2 | LVPVPITNATLDR_5_4_1_2 | 40.9                                    | 0.0              | 9.4            | 0.0              | 100.0            | 29.1              | 96.4           | 0.0              | 0.0            | 0.0              | 0.0            | 0.0              | 58.5           | 8.2              | Outer                 |
| 282 | AGP exp_2   | 15539        | Alpha-1-acid glycoprotein 2 | LVPVPITNATLDR_5_4_1_2 | 35.2                                    | 0.0              | 0.0            | 0.0              | 90.8             | 33.6              | 100.0          | 0.0              | 0.0            | 0.0              | 16.1           | 0.0              | 32.5           | 5.0              | Outer                 |
| 283 | AGP exp_2   | 12153        | Alpha-1-acid glycoprotein 2 | LVPVPITNATLDR_5_5_0_1 | 36.9                                    | 0.0              | 0.0            | 0.0              | 51.9             | 0.0               | 100.0          | 0.0              | 11.4           | 0.0              | 8.8            | 0.0              | 53.6           | 0.0              | None                  |
| 284 | AGP exp_1   | 11548        | Alpha-1-acid glycoprotein 2 | LVPVPITNATLDR_5_5_0_1 | 58.2                                    | 0.0              | 0.0            | 0.0              | 65.8             | 0.0               | 100.0          | 0.0              | 11.8           | 0.0              | 0.0            | 0.0              | 22.7           | 0.0              | None                  |

Supplementary Table 1. Continued.

| No. | Experiments | CID Scan No. | N-glycoproteins             | N-glycopeptides       | Relative intensities of B/Y series ions |                  |                |                  |                  |                   |                |                  |                |                  |                |                  |                |                  | Manual Classification |
|-----|-------------|--------------|-----------------------------|-----------------------|-----------------------------------------|------------------|----------------|------------------|------------------|-------------------|----------------|------------------|----------------|------------------|----------------|------------------|----------------|------------------|-----------------------|
|     |             |              |                             |                       | B <sub>2</sub>                          | B <sub>2</sub> F | B <sub>3</sub> | B <sub>3</sub> F | B <sub>2</sub> S | B <sub>2</sub> SF | Y <sub>1</sub> | Y <sub>1</sub> F | Y <sub>2</sub> | Y <sub>2</sub> F | Y <sub>3</sub> | Y <sub>3</sub> F | Y <sub>4</sub> | Y <sub>4</sub> F |                       |
| 285 | AGP exp_1   | 11847        | Alpha-1-acid glycoprotein 2 | LVPVPITNATLDR_5_5_0_1 | 75.1                                    | 0.0              | 0.0            | 0.0              | 84.6             | 0.0               | 86.5           | 0.0              | 13.7           | 0.0              | 0.0            | 0.0              | 100.0          | 0.0              | None                  |
| 286 | AGP exp_2   | 15705        | Alpha-1-acid glycoprotein 2 | LVPVPITNATLDR_5_5_0_2 | 11.2                                    | 0.0              | 0.0            | 0.0              | 100.0            | 0.0               | 60.4           | 0.0              | 3.2            | 0.0              | 0.0            | 0.0              | 30.4           | 0.0              | None                  |
| 287 | AGP exp_2   | 12110        | Alpha-1-acid glycoprotein 2 | LVPVPITNATLDR_6_5_0_1 | 44.9                                    | 0.0              | 0.0            | 0.0              | 68.5             | 0.0               | 100.0          | 0.0              | 0.0            | 0.0              | 11.0           | 0.0              | 25.0           | 0.0              | None                  |
| 288 | AGP exp_2   | 11937        | Alpha-1-acid glycoprotein 2 | LVPVPITNATLDR_6_5_0_1 | 100.0                                   | 0.0              | 6.0            | 0.0              | 41.9             | 0.0               | 20.9           | 0.0              | 3.3            | 0.0              | 8.1            | 0.0              | 42.8           | 0.0              | None                  |
| 289 | AGP exp_1   | 11608        | Alpha-1-acid glycoprotein 2 | LVPVPITNATLDR_6_5_0_1 | 100.0                                   | 0.0              | 6.8            | 0.0              | 43.4             | 0.0               | 17.8           | 0.0              | 0.0            | 0.0              | 9.5            | 0.0              | 41.7           | 0.0              | None                  |
| 290 | AGP exp_1   | 14686        | Alpha-1-acid glycoprotein 2 | LVPVPITNATLDR_6_5_0_2 | 0.0                                     | 0.0              | 0.0            | 0.0              | 9.6              | 0.0               | 100.0          | 0.0              | 14.7           | 0.0              | 9.1            | 0.0              | 5.5            | 0.0              | None                  |
| 291 | AGP exp_1   | 14947        | Alpha-1-acid glycoprotein 2 | LVPVPITNATLDR_6_5_0_2 | 94.3                                    | 0.0              | 5.4            | 0.0              | 100.0            | 0.0               | 38.2           | 0.0              | 6.7            | 0.0              | 0.0            | 0.0              | 42.2           | 0.0              | None                  |
| 292 | AGP exp_2   | 15460        | Alpha-1-acid glycoprotein 2 | LVPVPITNATLDR_6_5_0_2 | 88.0                                    | 0.0              | 2.6            | 0.0              | 100.0            | 0.0               | 28.0           | 0.0              | 7.1            | 0.0              | 0.0            | 0.0              | 34.0           | 0.0              | None                  |
| 293 | AGP exp_1   | 14571        | Alpha-1-acid glycoprotein 2 | LVPVPITNATLDR_6_5_0_2 | 85.6                                    | 0.0              | 6.0            | 0.0              | 100.0            | 0.0               | 25.9           | 0.0              | 6.8            | 0.0              | 0.0            | 0.0              | 28.9           | 0.0              | None                  |
| 294 | AGP exp_2   | 15123        | Alpha-1-acid glycoprotein 2 | LVPVPITNATLDR_6_5_0_2 | 78.4                                    | 0.0              | 5.5            | 0.0              | 100.0            | 0.0               | 33.6           | 0.0              | 9.1            | 0.0              | 0.0            | 0.0              | 33.9           | 0.0              | None                  |
| 295 | AGP exp_1   | 18288        | Alpha-1-acid glycoprotein 2 | LVPVPITNATLDR_6_5_0_3 | 43.0                                    | 0.0              | 0.0            | 0.0              | 100.0            | 0.0               | 25.4           | 0.0              | 5.0            | 0.0              | 6.8            | 0.0              | 0.0            | 0.0              | None                  |
| 296 | AGP exp_1   | 18623        | Alpha-1-acid glycoprotein 2 | LVPVPITNATLDR_6_5_0_3 | 44.5                                    | 0.0              | 0.0            | 0.0              | 100.0            | 0.0               | 26.1           | 0.0              | 4.9            | 0.0              | 5.2            | 0.0              | 0.0            | 0.0              | None                  |
| 297 | AGP exp_2   | 19281        | Alpha-1-acid glycoprotein 2 | LVPVPITNATLDR_6_5_0_3 | 39.3                                    | 0.0              | 0.0            | 0.0              | 100.0            | 0.0               | 23.2           | 0.0              | 4.8            | 0.0              | 4.6            | 0.0              | 0.0            | 0.0              | None                  |
| 298 | AGP exp_2   | 19603        | Alpha-1-acid glycoprotein 2 | LVPVPITNATLDR_6_5_0_3 | 33.7                                    | 0.0              | 3.5            | 0.0              | 100.0            | 0.0               | 20.4           | 0.0              | 4.8            | 0.0              | 0.0            | 0.0              | 0.0            | 0.0              | None                  |
| 299 | AGP exp_2   | 18920        | Alpha-1-acid glycoprotein 2 | LVPVPITNATLDR_6_5_0_3 | 44.0                                    | 0.0              | 3.9            | 0.0              | 100.0            | 0.0               | 26.2           | 0.0              | 4.5            | 0.0              | 5.1            | 0.0              | 0.0            | 0.0              | None                  |
| 300 | AGP exp_2   | 11797        | Alpha-1-acid glycoprotein 2 | LVPVPITNATLDR_6_5_1_1 | 39.0                                    | 24.2             | 0.0            | 0.0              | 79.1             | 48.0              | 100.0          | 0.0              | 7.2            | 0.0              | 6.4            | 0.0              | 17.4           | 0.0              | Outer                 |
| 301 | AGP exp_1   | 11413        | Alpha-1-acid glycoprotein 2 | LVPVPITNATLDR_6_5_1_1 | 36.7                                    | 34.6             | 0.0            | 0.0              | 77.2             | 14.4              | 100.0          | 0.0              | 0.0            | 0.0              | 0.0            | 0.0              | 25.8           | 0.0              | Outer                 |
| 302 | AGP exp_1   | 14674        | Alpha-1-acid glycoprotein 2 | LVPVPITNATLDR_6_5_1_2 | 0.0                                     | 10.7             | 0.0            | 0.0              | 100.0            | 52.0              | 75.5           | 0.0              | 0.0            | 0.0              | 0.0            | 0.0              | 19.0           | 0.0              | Outer                 |
| 303 | AGP exp_2   | 15241        | Alpha-1-acid glycoprotein 2 | LVPVPITNATLDR_6_5_1_2 | 0.0                                     | 10.0             | 0.0            | 0.0              | 100.0            | 56.1              | 75.1           | 0.0              | 8.0            | 0.0              | 0.0            | 0.0              | 17.5           | 0.0              | Outer                 |
| 304 | AGP exp_1   | 15014        | Alpha-1-acid glycoprotein 2 | LVPVPITNATLDR_6_5_1_2 | 0.0                                     | 12.5             | 0.0            | 0.0              | 100.0            | 54.6              | 93.9           | 0.0              | 0.0            | 0.0              | 9.6            | 0.0              | 19.9           | 0.0              | Outer                 |
| 305 | AGP exp_2   | 15562        | Alpha-1-acid glycoprotein 2 | LVPVPITNATLDR_6_5_1_2 | 0.0                                     | 9.6              | 0.0            | 0.0              | 100.0            | 28.6              | 75.1           | 0.0              | 0.0            | 0.0              | 8.4            | 0.0              | 16.0           | 0.0              | Outer                 |
| 306 | AGP exp_2   | 14877        | Alpha-1-acid glycoprotein 2 | LVPVPITNATLDR_6_5_1_2 | 0.0                                     | 20.3             | 0.0            | 0.0              | 100.0            | 15.1              | 74.0           | 0.0              | 0.0            | 0.0              | 0.0            | 0.0              | 7.1            | 0.0              | Outer                 |
| 307 | AGP exp_1   | 14782        | Alpha-1-acid glycoprotein 2 | LVPVPITNATLDR_6_5_1_2 | 75.4                                    | 11.0             | 6.4            | 0.0              | 100.0            | 26.3              | 29.5           | 0.0              | 4.1            | 0.0              | 11.4           | 0.0              | 32.7           | 0.0              | Outer                 |
| 308 | AGP exp_2   | 15289        | Alpha-1-acid glycoprotein 2 | LVPVPITNATLDR_6_5_1_2 | 97.0                                    | 18.9             | 5.2            | 0.0              | 100.0            | 28.6              | 42.4           | 0.0              | 8.0            | 0.0              | 9.4            | 0.0              | 38.3           | 0.0              | Outer                 |
| 309 | AGP exp_1   | 14434        | Alpha-1-acid glycoprotein 2 | LVPVPITNATLDR_6_5_1_2 | 81.8                                    | 14.0             | 0.0            | 0.0              | 100.0            | 9.7               | 22.9           | 0.0              | 0.0            | 0.0              | 0.0            | 0.0              | 12.7           | 0.0              | Outer                 |
| 310 | AGP exp_1   | 14441        | Alpha-1-acid glycoprotein 2 | LVPVPITNATLDR_6_5_1_2 | 68.7                                    | 17.0             | 0.0            | 0.0              | 100.0            | 0.0               | 25.2           | 0.0              | 0.0            | 0.0              | 8.9            | 0.0              | 33.6           | 0.0              | Outer                 |

**Supplementary Table 1. Continued.**

| No. | Experiments | CID Scan No. | N-glycoproteins             | N-glycopeptides       | Relative intensities of B/Y series ions |                  |                |                  |                  |                   |                |                  |                |                  |                |                  |                |                  | Manual Classification |
|-----|-------------|--------------|-----------------------------|-----------------------|-----------------------------------------|------------------|----------------|------------------|------------------|-------------------|----------------|------------------|----------------|------------------|----------------|------------------|----------------|------------------|-----------------------|
|     |             |              |                             |                       | B <sub>2</sub>                          | B <sub>2</sub> F | B <sub>3</sub> | B <sub>3</sub> F | B <sub>2</sub> S | B <sub>2</sub> SF | Y <sub>1</sub> | Y <sub>1</sub> F | Y <sub>2</sub> | Y <sub>2</sub> F | Y <sub>3</sub> | Y <sub>3</sub> F | Y <sub>4</sub> | Y <sub>4</sub> F |                       |
| 311 | AGP exp_1   | 18433        | Alpha-1-acid glycoprotein 2 | LVPVPITNATLDR_6_5_1_3 | 0.0                                     | 6.1              | 0.0            | 0.0              | 100.0            | 43.6              | 57.1           | 0.0              | 0.0            | 0.0              | 0.0            | 0.0              | 9.5            | 0.0              | Outer                 |
| 312 | AGP exp_1   | 18550        | Alpha-1-acid glycoprotein 2 | LVPVPITNATLDR_6_5_1_3 | 33.2                                    | 6.0              | 0.0            | 0.0              | 100.0            | 13.1              | 19.4           | 0.0              | 2.3            | 0.0              | 2.4            | 0.0              | 0.0            | 0.0              | Outer                 |
| 313 | AGP exp_2   | 19176        | Alpha-1-acid glycoprotein 2 | LVPVPITNATLDR_6_5_1_3 | 31.1                                    | 5.0              | 0.0            | 0.0              | 100.0            | 20.9              | 20.2           | 0.0              | 4.1            | 0.0              | 4.6            | 0.0              | 0.0            | 0.0              | Outer                 |
| 314 | IgG exp_4   | 5355         | Ig gamma-1 chain C region   | EEQYNSTYR_3_3_0_0     | 12.3                                    | 0.0              | 10.1           | 0.0              | 0.0              | 0.0               | 100.0          | 0.0              | 11.3           | 0.0              | 26.3           | 0.0              | 50.8           | 0.0              | None                  |
| 315 | IgG exp_3   | 4184         | Ig gamma-1 chain C region   | EEQYNSTYR_3_3_1_0     | 8.9                                     | 0.0              | 9.1            | 0.0              | 0.0              | 0.0               | 100.0          | 51.9             | 13.6           | 2.6              | 14.3           | 7.2              | 25.2           | 5.4              | Core                  |
| 316 | IgG exp_1   | 3022         | Ig gamma-1 chain C region   | EEQYNSTYR_3_3_1_0     | 9.0                                     | 0.0              | 9.2            | 0.0              | 0.0              | 0.0               | 100.0          | 49.4             | 14.9           | 2.6              | 14.8           | 4.5              | 26.4           | 5.4              | Core                  |
| 317 | IgG exp_4   | 5322         | Ig gamma-1 chain C region   | EEQYNSTYR_3_3_1_0     | 7.3                                     | 0.0              | 10.1           | 0.0              | 0.0              | 0.0               | 100.0          | 53.6             | 14.5           | 2.4              | 14.4           | 3.0              | 27.1           | 6.7              | Core                  |
| 318 | IgG exp_2   | 3021         | Ig gamma-1 chain C region   | EEQYNSTYR_3_3_1_0     | 14.8                                    | 0.0              | 15.9           | 0.0              | 0.0              | 0.0               | 100.0          | 64.2             | 18.4           | 2.9              | 20.6           | 8.9              | 45.7           | 15.7             | Core                  |
| 319 | IgG exp_4   | 5328         | Ig gamma-1 chain C region   | EEQYNSTYR_3_4_0_0     | 2.7                                     | 0.0              | 6.1            | 0.0              | 0.0              | 0.0               | 100.0          | 0.0              | 16.0           | 0.0              | 12.9           | 0.0              | 20.8           | 0.0              | None                  |
| 320 | IgG exp_3   | 4222         | Ig gamma-1 chain C region   | EEQYNSTYR_3_4_0_0     | 3.0                                     | 0.0              | 6.7            | 0.0              | 0.0              | 0.0               | 100.0          | 0.0              | 18.1           | 0.0              | 14.4           | 0.0              | 21.4           | 0.0              | None                  |
| 321 | IgG exp_1   | 3126         | Ig gamma-1 chain C region   | EEQYNSTYR_3_4_0_0     | 3.8                                     | 0.0              | 6.9            | 0.0              | 0.0              | 0.0               | 100.0          | 0.0              | 19.5           | 0.0              | 15.6           | 0.0              | 29.1           | 0.0              | None                  |
| 322 | IgG exp_3   | 4091         | Ig gamma-1 chain C region   | EEQYNSTYR_3_4_1_0     | 0.0                                     | 0.0              | 16.2           | 0.0              | 0.0              | 0.0               | 100.0          | 72.6             | 18.7           | 11.5             | 21.6           | 8.6              | 38.8           | 21.6             | Core                  |
| 323 | IgG exp_3   | 4405         | Ig gamma-1 chain C region   | EEQYNSTYR_3_4_1_0     | 0.0                                     | 0.0              | 11.8           | 0.0              | 0.0              | 0.0               | 100.0          | 54.7             | 20.9           | 6.8              | 18.3           | 0.0              | 32.2           | 9.5              | Core                  |
| 324 | IgG exp_4   | 5187         | Ig gamma-1 chain C region   | EEQYNSTYR_3_4_1_0     | 0.0                                     | 0.0              | 9.6            | 0.0              | 0.0              | 0.0               | 100.0          | 60.9             | 19.2           | 6.9              | 18.2           | 4.4              | 31.0           | 8.5              | Core                  |
| 325 | IgG exp_2   | 2997         | Ig gamma-1 chain C region   | EEQYNSTYR_3_4_1_0     | 0.0                                     | 0.0              | 9.1            | 0.0              | 0.0              | 0.0               | 100.0          | 54.0             | 18.4           | 5.6              | 15.9           | 0.0              | 23.0           | 7.0              | Core                  |
| 326 | IgG exp_1   | 2937         | Ig gamma-1 chain C region   | EEQYNSTYR_3_4_1_0     | 0.0                                     | 0.0              | 14.4           | 0.0              | 0.0              | 0.0               | 100.0          | 72.2             | 21.9           | 9.3              | 17.5           | 6.2              | 37.3           | 17.5             | Core                  |
| 327 | IgG exp_4   | 5471         | Ig gamma-1 chain C region   | EEQYNSTYR_3_5_0_0     | 0.0                                     | 0.0              | 3.3            | 0.0              | 0.0              | 0.0               | 100.0          | 0.0              | 36.6           | 0.0              | 12.3           | 0.0              | 11.9           | 0.0              | None                  |
| 328 | IgG exp_3   | 4720         | Ig gamma-1 chain C region   | EEQYNSTYR_3_5_1_0     | 0.0                                     | 0.0              | 3.4            | 0.0              | 0.0              | 0.0               | 100.0          | 52.9             | 36.4           | 17.7             | 13.5           | 0.0              | 11.8           | 0.0              | Core                  |
| 329 | IgG exp_4   | 5432         | Ig gamma-1 chain C region   | EEQYNSTYR_3_5_1_0     | 0.0                                     | 0.0              | 3.7            | 0.0              | 0.0              | 0.0               | 100.0          | 56.4             | 36.7           | 17.2             | 14.0           | 5.0              | 10.4           | 2.7              | Core                  |
| 330 | IgG exp_1   | 3153         | Ig gamma-1 chain C region   | EEQYNSTYR_3_5_1_0     | 0.0                                     | 0.0              | 3.8            | 0.0              | 0.0              | 0.0               | 100.0          | 52.8             | 33.8           | 16.2             | 16.3           | 2.5              | 9.8            | 2.6              | Core                  |
| 331 | IgG exp_1   | 3010         | Ig gamma-1 chain C region   | EEQYNSTYR_4_3_1_0     | 8.7                                     | 0.0              | 8.4            | 0.0              | 0.0              | 0.0               | 100.0          | 73.8             | 11.8           | 3.7              | 10.6           | 0.0              | 24.4           | 3.1              | Core                  |
| 332 | IgG exp_4   | 5305         | Ig gamma-1 chain C region   | EEQYNSTYR_4_3_1_0     | 9.1                                     | 2.6              | 9.0            | 0.0              | 0.0              | 0.0               | 100.0          | 76.4             | 10.7           | 4.2              | 9.5            | 0.0              | 24.9           | 3.8              | Core                  |
| 333 | IgG exp_3   | 4168         | Ig gamma-1 chain C region   | EEQYNSTYR_4_3_1_0     | 9.6                                     | 1.7              | 9.1            | 0.0              | 0.0              | 0.0               | 100.0          | 80.1             | 13.1           | 4.4              | 10.6           | 0.0              | 27.6           | 3.0              | Core                  |
| 334 | IgG exp_3   | 4197         | Ig gamma-1 chain C region   | EEQYNSTYR_4_4_0_0     | 0.0                                     | 0.0              | 5.2            | 0.0              | 0.0              | 0.0               | 100.0          | 0.0              | 14.6           | 0.0              | 12.5           | 0.0              | 22.4           | 0.0              | None                  |
| 335 | IgG exp_1   | 3062         | Ig gamma-1 chain C region   | EEQYNSTYR_4_4_0_0     | 0.0                                     | 0.0              | 5.3            | 0.0              | 0.0              | 0.0               | 100.0          | 0.0              | 14.9           | 0.0              | 12.2           | 0.0              | 22.4           | 0.0              | None                  |
| 336 | IgG exp_4   | 5318         | Ig gamma-1 chain C region   | EEQYNSTYR_4_4_0_0     | 0.0                                     | 0.0              | 5.3            | 0.0              | 0.0              | 0.0               | 100.0          | 0.0              | 15.9           | 0.0              | 13.0           | 0.0              | 24.0           | 0.0              | None                  |



Supplementary Table 1. Continued.

| No. | Experiments | CID Scan No. | N-glycoproteins           | N-glycopeptides   | Relative intensities of B/Y series ions |                  |                |                  |                  |                   |                |                  |                |                  |                |                  |                |                  | Manual Classification |
|-----|-------------|--------------|---------------------------|-------------------|-----------------------------------------|------------------|----------------|------------------|------------------|-------------------|----------------|------------------|----------------|------------------|----------------|------------------|----------------|------------------|-----------------------|
|     |             |              |                           |                   | B <sub>2</sub>                          | B <sub>2</sub> F | B <sub>3</sub> | B <sub>3</sub> F | B <sub>2</sub> S | B <sub>2</sub> SF | Y <sub>1</sub> | Y <sub>1</sub> F | Y <sub>2</sub> | Y <sub>2</sub> F | Y <sub>3</sub> | Y <sub>3</sub> F | Y <sub>4</sub> | Y <sub>4</sub> F |                       |
| 337 | IgG exp_4   | 5181         | Ig gamma-1 chain C region | EEQYNSTYR_4_4_1_0 | 0.0                                     | 0.0              | 18.2           | 0.0              | 0.0              | 0.0               | 22.6           | 100.0            | 18.6           | 11.3             | 20.2           | 0.0              | 28.4           | 5.8              | Core                  |
| 338 | IgG exp_2   | 3046         | Ig gamma-1 chain C region | EEQYNSTYR_4_4_1_0 | 0.0                                     | 3.0              | 11.7           | 0.0              | 0.0              | 0.0               | 16.6           | 100.0            | 24.1           | 10.9             | 23.4           | 4.0              | 40.3           | 8.6              | Core                  |
| 339 | IgG exp_3   | 4407         | Ig gamma-1 chain C region | EEQYNSTYR_4_4_1_0 | 0.0                                     | 3.2              | 14.9           | 0.0              | 0.0              | 0.0               | 19.6           | 100.0            | 27.6           | 11.7             | 26.1           | 9.4              | 46.5           | 10.0             | Core                  |
| 340 | IgG exp_1   | 2894         | Ig gamma-1 chain C region | EEQYNSTYR_4_4_1_0 | 0.0                                     | 3.1              | 11.2           | 0.0              | 0.0              | 0.0               | 9.8            | 100.0            | 17.4           | 11.5             | 22.6           | 4.4              | 36.9           | 9.9              | Core                  |
| 341 | IgG exp_3   | 4075         | Ig gamma-1 chain C region | EEQYNSTYR_4_4_1_0 | 0.0                                     | 4.2              | 11.8           | 0.0              | 0.0              | 0.0               | 7.8            | 100.0            | 21.5           | 14.4             | 16.0           | 8.0              | 44.8           | 9.6              | Core                  |
| 342 | IgG exp_1   | 3281         | Ig gamma-1 chain C region | EEQYNSTYR_4_4_1_0 | 0.0                                     | 0.0              | 12.6           | 0.0              | 0.0              | 0.0               | 16.4           | 100.0            | 23.2           | 11.7             | 20.7           | 2.5              | 32.4           | 8.8              | Core                  |
| 343 | IgG exp_2   | 6163         | Ig gamma-1 chain C region | EEQYNSTYR_4_4_1_0 | 0.0                                     | 0.0              | 6.8            | 0.0              | 0.0              | 0.0               | 9.8            | 100.0            | 17.9           | 12.8             | 10.0           | 4.1              | 43.9           | 7.2              | Core                  |
| 344 | IgG exp_3   | 5170         | Ig gamma-1 chain C region | EEQYNSTYR_4_4_1_1 | 70.8                                    | 0.0              | 0.0            | 0.0              | 100.0            | 0.0               | 63.2           | 36.7             | 0.0            | 0.0              | 0.0            | 0.0              | 30.2           | 22.8             | Core                  |
| 345 | IgG exp_4   | 6142         | Ig gamma-1 chain C region | EEQYNSTYR_4_4_1_1 | 69.8                                    | 0.0              | 15.0           | 0.0              | 100.0            | 0.0               | 59.3           | 47.1             | 0.0            | 0.0              | 0.0            | 0.0              | 27.7           | 25.2             | Core                  |
| 346 | IgG exp_1   | 3787         | Ig gamma-1 chain C region | EEQYNSTYR_4_4_1_1 | 64.8                                    | 0.0              | 0.0            | 0.0              | 100.0            | 0.0               | 41.5           | 38.5             | 0.0            | 0.0              | 0.0            | 0.0              | 18.4           | 0.0              | Core                  |
| 347 | IgG exp_3   | 5195         | Ig gamma-1 chain C region | EEQYNSTYR_4_4_1_1 | 0.0                                     | 0.0              | 6.1            | 0.0              | 14.8             | 0.0               | 100.0          | 0.0              | 16.2           | 9.1              | 12.6           | 0.0              | 23.5           | 3.0              | Core                  |
| 348 | IgG exp_1   | 3774         | Ig gamma-1 chain C region | EEQYNSTYR_4_4_1_1 | 0.0                                     | 0.0              | 6.5            | 0.0              | 18.5             | 0.0               | 100.0          | 0.0              | 14.1           | 11.2             | 15.5           | 0.0              | 32.1           | 5.4              | Core                  |
| 349 | IgG exp_4   | 6150         | Ig gamma-1 chain C region | EEQYNSTYR_4_4_1_1 | 0.0                                     | 0.0              | 7.2            | 0.0              | 18.1             | 0.0               | 100.0          | 0.0              | 11.2           | 9.1              | 14.4           | 0.0              | 23.2           | 4.0              | Core                  |
| 350 | IgG exp_2   | 3220         | Ig gamma-1 chain C region | EEQYNSTYR_4_4_1_1 | 79.9                                    | 0.0              | 22.4           | 0.0              | 100.0            | 0.0               | 27.9           | 28.0             | 0.0            | 0.0              | 0.0            | 0.0              | 13.2           | 20.2             | Core                  |
| 351 | IgG exp_2   | 3226         | Ig gamma-1 chain C region | EEQYNSTYR_4_4_1_1 | 0.0                                     | 0.0              | 17.3           | 0.0              | 27.3             | 0.0               | 100.0          | 0.0              | 18.1           | 0.0              | 5.7            | 7.3              | 29.3           | 0.0              | Core                  |
| 352 | IgG exp_1   | 3099         | Ig gamma-1 chain C region | EEQYNSTYR_4_5_1_0 | 0.0                                     | 0.0              | 4.1            | 0.0              | 0.0              | 0.0               | 100.0          | 75.5             | 31.5           | 20.9             | 11.4           | 2.9              | 9.0            | 0.0              | Core                  |
| 353 | IgG exp_4   | 5428         | Ig gamma-1 chain C region | EEQYNSTYR_4_5_1_0 | 0.0                                     | 0.0              | 4.0            | 0.0              | 0.0              | 0.0               | 100.0          | 78.1             | 32.8           | 20.1             | 11.1           | 3.1              | 8.5            | 0.0              | Core                  |
| 354 | IgG exp_3   | 4716         | Ig gamma-1 chain C region | EEQYNSTYR_4_5_1_0 | 0.0                                     | 0.0              | 4.8            | 0.0              | 0.0              | 0.0               | 100.0          | 82.9             | 33.9           | 21.5             | 10.3           | 2.8              | 10.1           | 0.0              | Core                  |
| 355 | IgG exp_2   | 3050         | Ig gamma-1 chain C region | EEQYNSTYR_4_5_1_0 | 0.0                                     | 0.0              | 4.9            | 0.0              | 0.0              | 0.0               | 100.0          | 73.3             | 22.6           | 12.7             | 5.6            | 0.0              | 8.1            | 2.1              | Core                  |
| 356 | IgG exp_4   | 5299         | Ig gamma-1 chain C region | EEQYNSTYR_5_4_0_0 | 0.0                                     | 0.0              | 4.5            | 0.0              | 0.0              | 0.0               | 100.0          | 0.0              | 16.6           | 0.0              | 14.6           | 0.0              | 25.6           | 0.0              | None                  |
| 357 | IgG exp_3   | 4199         | Ig gamma-1 chain C region | EEQYNSTYR_5_4_0_0 | 0.0                                     | 0.0              | 5.2            | 0.0              | 0.0              | 0.0               | 100.0          | 0.0              | 14.5           | 0.0              | 14.9           | 0.0              | 28.2           | 0.0              | None                  |
| 358 | IgG exp_3   | 5257         | Ig gamma-1 chain C region | EEQYNSTYR_5_4_0_1 | 0.0                                     | 0.0              | 5.4            | 0.0              | 13.0             | 0.0               | 100.0          | 0.0              | 11.5           | 0.0              | 9.8            | 0.0              | 24.5           | 0.0              | None                  |
| 359 | IgG exp_1   | 2875         | Ig gamma-1 chain C region | EEQYNSTYR_5_4_1_0 | 0.0                                     | 4.9              | 9.2            | 0.0              | 0.0              | 0.0               | 94.8           | 100.0            | 22.6           | 15.6             | 13.9           | 12.4             | 36.4           | 3.8              | Core                  |
| 360 | IgG exp_3   | 4085         | Ig gamma-1 chain C region | EEQYNSTYR_5_4_1_0 | 0.0                                     | 0.0              | 9.6            | 0.0              | 0.0              | 0.0               | 100.0          | 80.2             | 13.7           | 12.1             | 15.2           | 6.7              | 30.5           | 3.5              | Core                  |
| 361 | IgG exp_2   | 3003         | Ig gamma-1 chain C region | EEQYNSTYR_5_4_1_0 | 0.0                                     | 3.4              | 13.5           | 0.0              | 0.0              | 0.0               | 100.0          | 93.4             | 12.3           | 11.8             | 19.3           | 0.0              | 27.4           | 3.5              | Core                  |
| 362 | IgG exp_4   | 5179         | Ig gamma-1 chain C region | EEQYNSTYR_5_4_1_0 | 0.0                                     | 2.9              | 7.3            | 0.0              | 0.0              | 0.0               | 75.7           | 100.0            | 12.5           | 12.1             | 11.7           | 8.2              | 23.5           | 4.5              | Core                  |

Supplementary Table 1. Continued.

| No. | Experiments | CID Scan No. | N-glycoproteins           | N-glycopeptides   | Relative intensities of B/Y series ions |                  |                |                  |                  |                   |                |                  |                |                  |                |                  |                |                  | Manual Classification |
|-----|-------------|--------------|---------------------------|-------------------|-----------------------------------------|------------------|----------------|------------------|------------------|-------------------|----------------|------------------|----------------|------------------|----------------|------------------|----------------|------------------|-----------------------|
|     |             |              |                           |                   | B <sub>2</sub>                          | B <sub>2</sub> F | B <sub>3</sub> | B <sub>3</sub> F | B <sub>2</sub> S | B <sub>2</sub> SF | Y <sub>1</sub> | Y <sub>1</sub> F | Y <sub>2</sub> | Y <sub>2</sub> F | Y <sub>3</sub> | Y <sub>3</sub> F | Y <sub>4</sub> | Y <sub>4</sub> F |                       |
| 363 | IgG exp_3   | 4413         | Ig gamma-1 chain C region | EEQYNSTYR_5_4_1_0 | 0.0                                     | 0.0              | 0.0            | 0.0              | 0.0              | 0.0               | 100.0          | 99.6             | 9.5            | 9.9              | 10.4           | 0.0              | 28.5           | 0.0              | Core                  |
| 364 | IgG exp_3   | 5108         | Ig gamma-1 chain C region | EEQYNSTYR_5_4_1_1 | 100.0                                   | 0.0              | 11.8           | 0.0              | 77.6             | 0.0               | 33.5           | 47.3             | 0.0            | 0.0              | 0.0            | 0.0              | 0.0            | 0.0              | Core                  |
| 365 | IgG exp_1   | 3671         | Ig gamma-1 chain C region | EEQYNSTYR_5_4_1_1 | 100.0                                   | 0.0              | 11.2           | 0.0              | 79.9             | 0.0               | 32.5           | 43.9             | 0.0            | 0.0              | 0.0            | 0.0              | 0.0            | 0.0              | Core                  |
| 366 | IgG exp_4   | 6105         | Ig gamma-1 chain C region | EEQYNSTYR_5_4_1_1 | 100.0                                   | 0.0              | 10.7           | 0.0              | 73.8             | 0.0               | 37.2           | 46.6             | 0.0            | 0.0              | 0.0            | 0.0              | 11.5           | 0.0              | Core                  |
| 367 | IgG exp_3   | 5110         | Ig gamma-1 chain C region | EEQYNSTYR_5_4_1_1 | 0.0                                     | 2.4              | 5.6            | 0.0              | 18.0             | 0.0               | 100.0          | 95.9             | 15.7           | 15.9             | 16.0           | 10.2             | 30.1           | 0.0              | Core                  |
| 368 | IgG exp_4   | 6109         | Ig gamma-1 chain C region | EEQYNSTYR_5_4_1_1 | 0.0                                     | 2.0              | 5.4            | 0.0              | 18.3             | 0.0               | 97.8           | 100.0            | 19.3           | 17.0             | 16.4           | 10.4             | 29.1           | 2.2              | Core                  |
| 369 | IgG exp_1   | 3693         | Ig gamma-1 chain C region | EEQYNSTYR_5_4_1_1 | 0.0                                     | 2.2              | 5.7            | 0.0              | 19.5             | 0.0               | 100.0          | 98.4             | 15.5           | 16.8             | 17.1           | 11.3             | 32.9           | 0.0              | Core                  |
| 370 | IgG exp_2   | 3216         | Ig gamma-1 chain C region | EEQYNSTYR_5_4_1_1 | 0.0                                     | 0.0              | 6.7            | 0.0              | 27.1             | 0.0               | 98.6           | 100.0            | 15.4           | 17.9             | 14.0           | 11.5             | 34.8           | 0.0              | Core                  |
| 371 | IgG exp_4   | 5450         | Ig gamma-1 chain C region | EEQYNSTYR_5_5_1_0 | 0.0                                     | 0.0              | 6.5            | 0.0              | 0.0              | 0.0               | 100.0          | 96.3             | 32.8           | 36.1             | 10.7           | 3.5              | 9.5            | 0.0              | Core                  |
| 372 | IgG exp_4   | 7185         | Ig gamma-2 chain C region | EEQFNSTFR_3_3_1_0 | 12.8                                    | 0.0              | 10.5           | 0.0              | 0.0              | 0.0               | 100.0          | 55.8             | 17.3           | 3.0              | 18.1           | 6.4              | 36.6           | 7.5              | Core                  |
| 373 | IgG exp_1   | 4437         | Ig gamma-2 chain C region | EEQFNSTFR_3_3_1_0 | 11.1                                    | 0.0              | 10.5           | 0.0              | 0.0              | 0.0               | 100.0          | 54.3             | 15.9           | 3.1              | 16.9           | 5.5              | 32.1           | 7.1              | Core                  |
| 374 | IgG exp_3   | 5741         | Ig gamma-2 chain C region | EEQFNSTFR_3_3_1_0 | 6.6                                     | 0.0              | 10.1           | 0.0              | 0.0              | 0.0               | 100.0          | 52.1             | 17.0           | 0.0              | 13.3           | 0.0              | 26.8           | 6.2              | Core                  |
| 375 | IgG exp_2   | 3508         | Ig gamma-2 chain C region | EEQFNSTFR_3_3_1_0 | 6.3                                     | 0.0              | 7.7            | 0.0              | 0.0              | 0.0               | 100.0          | 43.8             | 13.4           | 3.2              | 12.3           | 4.1              | 25.3           | 6.4              | Core                  |
| 376 | IgG exp_3   | 5816         | Ig gamma-2 chain C region | EEQFNSTFR_3_4_0_0 | 2.9                                     | 0.0              | 5.7            | 0.0              | 0.0              | 0.0               | 100.0          | 0.0              | 15.8           | 0.0              | 12.6           | 0.0              | 24.8           | 0.0              | None                  |
| 377 | IgG exp_4   | 7313         | Ig gamma-2 chain C region | EEQFNSTFR_3_4_0_0 | 4.5                                     | 0.0              | 9.1            | 0.0              | 0.0              | 0.0               | 100.0          | 0.0              | 18.2           | 0.0              | 19.2           | 0.0              | 35.1           | 0.0              | None                  |
| 378 | IgG exp_1   | 4557         | Ig gamma-2 chain C region | EEQFNSTFR_3_4_0_0 | 4.2                                     | 0.0              | 8.7            | 0.0              | 0.0              | 0.0               | 100.0          | 0.0              | 19.7           | 0.0              | 16.8           | 0.0              | 32.4           | 0.0              | None                  |
| 379 | IgG exp_1   | 5662         | Ig gamma-2 chain C region | EEQFNSTFR_3_4_1_0 | 0.0                                     | 0.0              | 14.4           | 0.0              | 0.0              | 0.0               | 100.0          | 66.1             | 14.2           | 6.7              | 24.7           | 2.6              | 36.6           | 22.9             | Core                  |
| 380 | IgG exp_2   | 3469         | Ig gamma-2 chain C region | EEQFNSTFR_3_4_1_0 | 0.0                                     | 0.0              | 7.0            | 0.0              | 0.0              | 0.0               | 100.0          | 48.4             | 16.1           | 4.9              | 12.6           | 0.0              | 19.3           | 5.0              | Core                  |
| 381 | IgG exp_3   | 5721         | Ig gamma-2 chain C region | EEQFNSTFR_3_4_1_0 | 0.0                                     | 0.0              | 7.5            | 0.0              | 0.0              | 0.0               | 100.0          | 48.9             | 15.7           | 4.9              | 13.0           | 0.0              | 19.1           | 4.7              | Core                  |
| 382 | IgG exp_4   | 7480         | Ig gamma-2 chain C region | EEQFNSTFR_3_4_1_0 | 2.1                                     | 0.0              | 9.2            | 0.0              | 0.0              | 0.0               | 100.0          | 54.1             | 18.0           | 5.4              | 16.3           | 2.3              | 24.4           | 6.1              | Core                  |
| 383 | IgG exp_1   | 4661         | Ig gamma-2 chain C region | EEQFNSTFR_3_4_1_0 | 2.3                                     | 0.0              | 12.4           | 0.0              | 0.0              | 0.0               | 100.0          | 57.7             | 20.0           | 6.8              | 17.1           | 3.7              | 31.2           | 10.5             | Core                  |
| 384 | IgG exp_3   | 6073         | Ig gamma-2 chain C region | EEQFNSTFR_3_4_1_0 | 1.7                                     | 0.0              | 12.0           | 1.8              | 0.0              | 0.0               | 100.0          | 45.9             | 15.1           | 5.4              | 18.1           | 0.0              | 30.2           | 12.3             | Core                  |
| 385 | IgG exp_4   | 6975         | Ig gamma-2 chain C region | EEQFNSTFR_3_4_1_0 | 2.4                                     | 0.0              | 10.4           | 0.0              | 0.0              | 0.0               | 100.0          | 61.4             | 23.3           | 8.3              | 19.1           | 5.6              | 31.2           | 14.6             | Core                  |
| 386 | IgG exp_1   | 4325         | Ig gamma-2 chain C region | EEQFNSTFR_3_4_1_0 | 3.1                                     | 0.0              | 16.0           | 0.0              | 0.0              | 0.0               | 100.0          | 62.5             | 23.4           | 8.6              | 21.1           | 7.6              | 39.4           | 15.7             | Core                  |
| 387 | IgG exp_2   | 4229         | Ig gamma-2 chain C region | EEQFNSTFR_3_4_1_0 | 0.0                                     | 0.0              | 15.5           | 0.0              | 0.0              | 0.0               | 100.0          | 73.5             | 22.1           | 3.6              | 24.7           | 0.0              | 55.9           | 8.7              | Core                  |
| 388 | IgG exp_2   | 3496         | Ig gamma-2 chain C region | EEQFNSTFR_3_5_1_0 | 24.6                                    | 0.0              | 0.0            | 0.0              | 0.0              | 0.0               | 100.0          | 29.7             | 31.5           | 0.0              | 47.5           | 0.0              | 0.0            | 0.0              | Core                  |

Supplementary Table 1. Continued.

| No. | Experiments | CID Scan No. | N-glycoproteins           | N-glycopeptides   | Relative intensities of B/Y series ions |                  |                |                  |                  |                   |                |                  |                |                  |                |                  |                |                  | Manual Classification |
|-----|-------------|--------------|---------------------------|-------------------|-----------------------------------------|------------------|----------------|------------------|------------------|-------------------|----------------|------------------|----------------|------------------|----------------|------------------|----------------|------------------|-----------------------|
|     |             |              |                           |                   | B <sub>2</sub>                          | B <sub>2</sub> F | B <sub>3</sub> | B <sub>3</sub> F | B <sub>2</sub> S | B <sub>2</sub> SF | Y <sub>1</sub> | Y <sub>1</sub> F | Y <sub>2</sub> | Y <sub>2</sub> F | Y <sub>3</sub> | Y <sub>3</sub> F | Y <sub>4</sub> | Y <sub>4</sub> F |                       |
| 389 | IgG exp_2   | 3498         | Ig gamma-2 chain C region | EEQFNSTFR_3_5_1_0 | 0.0                                     | 0.0              | 3.9            | 0.0              | 0.0              | 0.0               | 100.0          | 53.3             | 35.6           | 18.3             | 14.2           | 2.7              | 10.6           | 2.6              | Core                  |
| 390 | IgG exp_4   | 7309         | Ig gamma-2 chain C region | EEQFNSTFR_3_5_1_0 | 0.0                                     | 0.0              | 4.1            | 0.0              | 0.0              | 0.0               | 100.0          | 52.6             | 36.7           | 16.7             | 13.9           | 2.5              | 9.5            | 2.3              | Core                  |
| 391 | IgG exp_3   | 5766         | Ig gamma-2 chain C region | EEQFNSTFR_3_5_1_0 | 0.0                                     | 0.0              | 3.7            | 0.0              | 0.0              | 0.0               | 100.0          | 52.0             | 37.1           | 16.2             | 14.5           | 0.0              | 9.9            | 2.2              | Core                  |
| 392 | IgG exp_1   | 4520         | Ig gamma-2 chain C region | EEQFNSTFR_3_5_1_0 | 0.0                                     | 0.0              | 4.0            | 0.0              | 0.0              | 0.0               | 100.0          | 56.4             | 37.9           | 17.9             | 13.4           | 0.0              | 9.7            | 2.3              | Core                  |
| 393 | IgG exp_4   | 7220         | Ig gamma-2 chain C region | EEQFNSTFR_4_3_1_0 | 14.3                                    | 3.0              | 10.1           | 0.0              | 0.0              | 0.0               | 100.0          | 75.5             | 14.8           | 5.3              | 10.2           | 0.0              | 33.5           | 5.5              | Core                  |
| 394 | IgG exp_4   | 7274         | Ig gamma-2 chain C region | EEQFNSTFR_4_4_0_0 | 3.6                                     | 0.0              | 7.9            | 0.0              | 0.0              | 0.0               | 100.0          | 0.0              | 19.5           | 0.0              | 17.0           | 0.0              | 33.6           | 0.0              | None                  |
| 395 | IgG exp_4   | 7270         | Ig gamma-2 chain C region | EEQFNSTFR_4_4_1_0 | 100.0                                   | 0.0              | 0.0            | 0.0              | 0.0              | 0.0               | 41.7           | 41.6             | 0.0            | 0.0              | 0.0            | 0.0              | 24.8           | 39.1             | Core                  |
| 396 | IgG exp_1   | 4427         | Ig gamma-2 chain C region | EEQFNSTFR_4_4_1_0 | 100.0                                   | 0.0              | 14.9           | 0.0              | 0.0              | 0.0               | 37.7           | 40.1             | 0.0            | 0.0              | 0.0            | 0.0              | 23.7           | 37.8             | Core                  |
| 397 | IgG exp_3   | 5694         | Ig gamma-2 chain C region | EEQFNSTFR_4_4_1_0 | 100.0                                   | 0.0              | 15.8           | 0.0              | 0.0              | 0.0               | 42.6           | 42.1             | 0.0            | 0.0              | 0.0            | 0.0              | 28.9           | 41.2             | Core                  |
| 398 | IgG exp_2   | 3467         | Ig gamma-2 chain C region | EEQFNSTFR_4_4_1_0 | 100.0                                   | 0.0              | 16.3           | 0.0              | 0.0              | 0.0               | 62.6           | 51.7             | 0.0            | 0.0              | 0.0            | 0.0              | 33.6           | 51.2             | Core                  |
| 399 | IgG exp_4   | 6926         | Ig gamma-2 chain C region | EEQFNSTFR_4_4_1_0 | 0.0                                     | 0.0              | 8.2            | 0.0              | 0.0              | 0.0               | 100.0          | 59.5             | 8.9            | 11.2             | 14.9           | 0.0              | 25.2           | 7.3              | Core                  |
| 400 | IgG exp_3   | 5692         | Ig gamma-2 chain C region | EEQFNSTFR_4_4_1_0 | 0.0                                     | 2.1              | 6.8            | 0.0              | 0.0              | 0.0               | 100.0          | 67.8             | 17.8           | 9.4              | 15.3           | 5.3              | 25.7           | 3.9              | Core                  |
| 401 | IgG exp_2   | 6486         | Ig gamma-2 chain C region | EEQFNSTFR_4_4_1_0 | 0.0                                     | 0.0              | 7.4            | 0.0              | 0.0              | 0.0               | 100.0          | 66.6             | 15.9           | 7.0              | 17.4           | 4.6              | 36.2           | 4.0              | Core                  |
| 402 | IgG exp_4   | 7268         | Ig gamma-2 chain C region | EEQFNSTFR_4_4_1_0 | 0.0                                     | 2.3              | 8.9            | 0.0              | 0.0              | 0.0               | 100.0          | 68.4             | 19.3           | 11.7             | 17.2           | 5.8              | 29.5           | 4.6              | Core                  |
| 403 | IgG exp_2   | 3400         | Ig gamma-2 chain C region | EEQFNSTFR_4_4_1_0 | 0.0                                     | 2.5              | 8.4            | 0.0              | 0.0              | 0.0               | 99.2           | 100.0            | 15.0           | 9.9              | 16.6           | 4.4              | 28.2           | 4.3              | Core                  |
| 404 | IgG exp_1   | 4717         | Ig gamma-2 chain C region | EEQFNSTFR_4_4_1_0 | 0.0                                     | 9.0              | 30.8           | 0.0              | 0.0              | 0.0               | 100.0          | 79.8             | 11.1           | 0.0              | 0.0            | 0.0              | 21.0           | 0.0              | Core                  |
| 405 | IgG exp_1   | 5111         | Ig gamma-2 chain C region | EEQFNSTFR_4_4_1_0 | 0.0                                     | 0.0              | 11.1           | 0.0              | 0.0              | 0.0               | 100.0          | 77.2             | 20.0           | 0.0              | 14.1           | 5.2              | 29.7           | 4.6              | Core                  |
| 406 | IgG exp_4   | 7620         | Ig gamma-2 chain C region | EEQFNSTFR_4_4_1_0 | 0.0                                     | 0.0              | 14.5           | 0.0              | 0.0              | 0.0               | 100.0          | 83.0             | 19.6           | 12.9             | 19.8           | 0.0              | 31.7           | 6.9              | Core                  |
| 407 | IgG exp_1   | 6085         | Ig gamma-2 chain C region | EEQFNSTFR_4_4_1_1 | 72.9                                    | 0.0              | 17.1           | 0.0              | 100.0            | 0.0               | 52.9           | 46.4             | 0.0            | 0.0              | 0.0            | 0.0              | 28.8           | 0.0              | Core                  |
| 408 | IgG exp_2   | 5075         | Ig gamma-2 chain C region | EEQFNSTFR_4_4_1_1 | 67.5                                    | 0.0              | 14.3           | 0.0              | 100.0            | 0.0               | 44.1           | 45.6             | 0.0            | 0.0              | 0.0            | 0.0              | 30.0           | 0.0              | Core                  |
| 409 | IgG exp_2   | 4772         | Ig gamma-2 chain C region | EEQFNSTFR_4_4_1_1 | 0.0                                     | 6.7              | 10.2           | 0.0              | 29.7             | 0.0               | 100.0          | 80.0             | 13.3           | 12.6             | 13.4           | 6.5              | 33.9           | 4.6              | Core                  |
| 410 | IgG exp_1   | 6083         | Ig gamma-2 chain C region | EEQFNSTFR_4_4_1_1 | 0.0                                     | 2.1              | 8.0            | 0.0              | 18.6             | 0.0               | 100.0          | 72.4             | 21.0           | 15.0             | 18.0           | 9.3              | 39.3           | 5.4              | Core                  |
| 411 | IgG exp_2   | 4745         | Ig gamma-2 chain C region | EEQFNSTFR_4_4_1_1 | 85.9                                    | 0.0              | 0.0            | 0.0              | 100.0            | 0.0               | 34.6           | 49.5             | 0.0            | 0.0              | 0.0            | 0.0              | 11.6           | 0.0              | Core                  |
| 412 | IgG exp_2   | 5110         | Ig gamma-2 chain C region | EEQFNSTFR_4_4_1_1 | 0.0                                     | 3.7              | 9.9            | 0.0              | 21.2             | 0.0               | 100.0          | 83.4             | 19.4           | 15.4             | 22.9           | 9.4              | 41.5           | 6.4              | Core                  |
| 413 | IgG exp_4   | 8721         | Ig gamma-2 chain C region | EEQFNSTFR_4_4_1_1 | 0.0                                     | 3.1              | 8.2            | 0.0              | 23.0             | 0.0               | 100.0          | 87.1             | 16.7           | 14.8             | 17.0           | 0.0              | 44.7           | 8.0              | Core                  |
| 414 | IgG exp_1   | 4464         | Ig gamma-2 chain C region | EEQFNSTFR_4_5_1_0 | 0.0                                     | 0.0              | 4.0            | 0.0              | 0.0              | 0.0               | 100.0          | 75.4             | 32.7           | 19.8             | 11.1           | 3.0              | 8.6            | 0.0              | Core                  |

Supplementary Table 1. Continued.

| No. | Experiments | CID Scan No. | N-glycoproteins           | N-glycopeptides   | Relative intensities of B/Y series ions |                  |                |                  |                  |                   |                |                  |                |                  |                |                  |                |                  | Manual Classification |
|-----|-------------|--------------|---------------------------|-------------------|-----------------------------------------|------------------|----------------|------------------|------------------|-------------------|----------------|------------------|----------------|------------------|----------------|------------------|----------------|------------------|-----------------------|
|     |             |              |                           |                   | B <sub>2</sub>                          | B <sub>2</sub> F | B <sub>3</sub> | B <sub>3</sub> F | B <sub>2</sub> S | B <sub>2</sub> SF | Y <sub>1</sub> | Y <sub>1</sub> F | Y <sub>2</sub> | Y <sub>2</sub> F | Y <sub>3</sub> | Y <sub>3</sub> F | Y <sub>4</sub> | Y <sub>4</sub> F |                       |
| 415 | IgG exp_3   | 5743         | Ig gamma-2 chain C region | EEQFNSTFR_4_5_1_0 | 0.0                                     | 0.0              | 4.8            | 0.0              | 0.0              | 0.0               | 100.0          | 72.7             | 33.0           | 22.0             | 11.3           | 3.2              | 10.2           | 0.0              | Core                  |
| 416 | IgG exp_4   | 7257         | Ig gamma-2 chain C region | EEQFNSTFR_4_5_1_0 | 0.0                                     | 0.0              | 4.9            | 0.0              | 0.0              | 0.0               | 100.0          | 74.5             | 34.6           | 21.6             | 13.0           | 3.1              | 9.9            | 0.0              | Core                  |
| 417 | IgG exp_2   | 3512         | Ig gamma-2 chain C region | EEQFNSTFR_4_5_1_0 | 0.0                                     | 0.0              | 10.5           | 0.0              | 0.0              | 0.0               | 100.0          | 91.9             | 34.3           | 19.7             | 18.5           | 2.7              | 10.0           | 3.0              | Core                  |
| 418 | IgG exp_4   | 7236         | Ig gamma-2 chain C region | EEQFNSTFR_5_4_0_0 | 0.0                                     | 0.0              | 4.8            | 0.0              | 0.0              | 0.0               | 100.0          | 6.6              | 11.3           | 0.0              | 11.4           | 0.0              | 18.0           | 0.0              | None                  |
| 419 | IgG exp_4   | 7214         | Ig gamma-2 chain C region | EEQFNSTFR_5_4_1_0 | 0.0                                     | 2.5              | 8.4            | 0.0              | 0.0              | 0.0               | 100.0          | 94.5             | 18.0           | 13.8             | 16.2           | 9.3              | 28.4           | 2.4              | Core                  |
| 420 | IgG exp_3   | 5671         | Ig gamma-2 chain C region | EEQFNSTFR_5_4_1_0 | 0.0                                     | 3.1              | 7.8            | 0.0              | 0.0              | 0.0               | 100.0          | 85.4             | 17.5           | 13.8             | 16.7           | 8.6              | 30.5           | 2.4              | Core                  |
| 421 | IgG exp_1   | 4373         | Ig gamma-2 chain C region | EEQFNSTFR_5_4_1_0 | 0.0                                     | 2.9              | 7.8            | 0.0              | 0.0              | 0.0               | 100.0          | 93.8             | 18.2           | 15.2             | 18.1           | 9.4              | 30.3           | 2.6              | Core                  |
| 422 | IgG exp_2   | 3436         | Ig gamma-2 chain C region | EEQFNSTFR_5_4_1_0 | 0.0                                     | 3.2              | 4.5            | 0.0              | 0.0              | 0.0               | 100.0          | 92.0             | 17.8           | 15.0             | 17.2           | 8.7              | 31.2           | 2.6              | Core                  |
| 423 | IgG exp_4   | 8669         | Ig gamma-2 chain C region | EEQFNSTFR_5_4_1_1 | 0.0                                     | 2.4              | 5.9            | 0.0              | 14.6             | 0.0               | 70.6           | 100.0            | 12.7           | 7.7              | 10.0           | 8.6              | 21.7           | 0.0              | Core                  |
| 424 | IgG exp_1   | 5940         | Ig gamma-2 chain C region | EEQFNSTFR_5_4_1_1 | 0.0                                     | 2.9              | 5.5            | 0.0              | 20.8             | 0.0               | 96.7           | 100.0            | 17.2           | 17.6             | 16.7           | 11.2             | 31.8           | 0.0              | Core                  |
| 425 | IgG exp_2   | 4872         | Ig gamma-2 chain C region | EEQFNSTFR_5_4_1_1 | 0.0                                     | 2.7              | 5.2            | 0.0              | 20.4             | 0.0               | 94.3           | 100.0            | 12.6           | 16.4             | 12.8           | 11.0             | 34.1           | 0.0              | Core                  |
| 426 | IgG exp_2   | 4542         | Ig gamma-2 chain C region | EEQFNSTFR_5_4_1_1 | 0.0                                     | 0.0              | 7.8            | 0.0              | 22.8             | 0.0               | 85.7           | 100.0            | 10.2           | 13.3             | 9.0            | 0.0              | 17.0           | 0.0              | Core                  |
| 427 | IgG exp_1   | 4447         | Ig gamma-2 chain C region | EEQFNSTFR_5_5_1_0 | 100.0                                   | 0.0              | 0.0            | 0.0              | 0.0              | 0.0               | 99.3           | 19.5             | 9.2            | 0.0              | 7.0            | 0.0              | 6.9            | 0.0              | Core                  |
| 428 | IgG exp_1   | 4468         | Ig gamma-2 chain C region | EEQFNSTFR_5_5_1_0 | 0.0                                     | 0.0              | 7.1            | 0.0              | 0.0              | 0.0               | 100.0          | 100.0            | 0.0            | 0.0              | 4.7            | 2.9              | 2.7            | 0.0              | Core                  |
| 429 | IgG exp_3   | 5122         | Ig gamma-3 chain C region | EEQYNSTFR_4_4_1_0 | 0.0                                     | 0.0              | 15.3           | 0.0              | 0.0              | 0.0               | 100.0          | 85.1             | 9.9            | 10.5             | 14.1           | 0.0              | 35.0           | 4.7              | Core                  |
| 430 | IgG exp_3   | 5130         | Ig gamma-4 chain C region | EEQFNSTYR_3_4_1_0 | 0.0                                     | 0.0              | 14.0           | 0.0              | 0.0              | 0.0               | 100.0          | 63.1             | 18.7           | 6.6              | 19.4           | 3.1              | 37.5           | 11.1             | Core                  |
| 431 | IgG exp_1   | 3739         | Ig gamma-4 chain C region | EEQFNSTYR_3_4_1_0 | 0.0                                     | 0.0              | 13.6           | 0.0              | 0.0              | 0.0               | 100.0          | 60.6             | 20.6           | 10.5             | 21.5           | 8.3              | 37.9           | 12.6             | Core                  |
| 432 | IgG exp_4   | 6100         | Ig gamma-4 chain C region | EEQFNSTYR_3_4_1_0 | 0.0                                     | 0.0              | 10.8           | 0.0              | 0.0              | 0.0               | 100.0          | 57.6             | 22.9           | 7.2              | 21.5           | 5.9              | 37.0           | 12.0             | Core                  |
| 433 | IgG exp_1   | 3712         | Ig gamma-4 chain C region | EEQFNSTYR_4_4_1_0 | 0.0                                     | 3.9              | 12.2           | 0.0              | 0.0              | 0.0               | 100.0          | 76.0             | 17.2           | 13.7             | 15.7           | 9.6              | 36.7           | 9.7              | Core                  |

**Supplementary Table 2.** Glycopeptide spectrum matches of alpha-1-acid glycoprotein and immunoglobulin gamma, and their relative intensities as test set for machine learning.

| No. | Experiments | CID Scan No. | N-glycoproteins             | N-glycopeptides | Relative intensities of B/Y series ions |                  |                |                  |                  |                   |                |                  |                |                  |                |                  |                |                  | Manual Classification |
|-----|-------------|--------------|-----------------------------|-----------------|-----------------------------------------|------------------|----------------|------------------|------------------|-------------------|----------------|------------------|----------------|------------------|----------------|------------------|----------------|------------------|-----------------------|
|     |             |              |                             |                 | B <sub>2</sub>                          | B <sub>2</sub> F | B <sub>3</sub> | B <sub>3</sub> F | B <sub>2</sub> S | B <sub>2</sub> SF | Y <sub>1</sub> | Y <sub>1</sub> F | Y <sub>2</sub> | Y <sub>2</sub> F | Y <sub>3</sub> | Y <sub>3</sub> F | Y <sub>4</sub> | Y <sub>4</sub> F |                       |
| 1   | AGP exp_3   | 2234         | Alpha-1-acid glycoprotein 1 | ENGTISR_4_4_0_1 | 44.2                                    | 0.0              | 0.0            | 0.0              | 50.0             | 0.0               | 0.0            | 0.0              | 42.2           | 0.0              | 100.0          | 0.0              | 18.9           | 0.0              | None                  |
| 2   | AGP exp_4   | 2128         | Alpha-1-acid glycoprotein 1 | ENGTISR_4_4_0_1 | 32.8                                    | 0.0              | 0.0            | 0.0              | 58.7             | 0.0               | 27.2           | 0.0              | 43.9           | 0.0              | 100.0          | 0.0              | 0.0            | 0.0              | None                  |
| 3   | AGP exp_3   | 3807         | Alpha-1-acid glycoprotein 1 | ENGTISR_5_4_0_2 | 67.2                                    | 0.0              | 4.0            | 0.0              | 100.0            | 0.0               | 36.0           | 0.0              | 0.0            | 0.0              | 0.0            | 0.0              | 31.9           | 0.0              | None                  |
| 4   | AGP exp_4   | 3700         | Alpha-1-acid glycoprotein 1 | ENGTISR_5_4_0_2 | 0.0                                     | 0.0              | 0.0            | 0.0              | 97.1             | 0.0               | 100.0          | 0.0              | 13.7           | 0.0              | 20.5           | 0.0              | 24.8           | 0.0              | None                  |
| 5   | AGP exp_3   | 3870         | Alpha-1-acid glycoprotein 1 | ENGTISR_5_4_0_2 | 0.0                                     | 0.0              | 0.0            | 0.0              | 73.4             | 0.0               | 100.0          | 0.0              | 19.3           | 0.0              | 16.7           | 0.0              | 31.3           | 0.0              | None                  |
| 6   | AGP exp_4   | 2230         | Alpha-1-acid glycoprotein 1 | ENGTISR_6_5_0_1 | 100.0                                   | 0.0              | 6.8            | 0.0              | 49.2             | 0.0               | 53.7           | 0.0              | 0.0            | 0.0              | 0.0            | 0.0              | 35.6           | 0.0              | None                  |
| 7   | AGP exp_3   | 2593         | Alpha-1-acid glycoprotein 1 | ENGTISR_6_5_0_1 | 100.0                                   | 0.0              | 9.5            | 0.0              | 56.0             | 0.0               | 91.5           | 0.0              | 0.0            | 0.0              | 0.0            | 0.0              | 33.3           | 0.0              | None                  |
| 8   | AGP exp_4   | 2506         | Alpha-1-acid glycoprotein 1 | ENGTISR_6_5_0_1 | 100.0                                   | 0.0              | 7.3            | 0.0              | 61.3             | 0.0               | 56.0           | 0.0              | 0.0            | 0.0              | 0.0            | 0.0              | 22.1           | 0.0              | None                  |
| 9   | AGP exp_3   | 3937         | Alpha-1-acid glycoprotein 1 | ENGTISR_6_5_0_2 | 74.7                                    | 0.0              | 0.0            | 0.0              | 100.0            | 0.0               | 82.3           | 0.0              | 8.5            | 0.0              | 0.0            | 0.0              | 41.8           | 0.0              | None                  |
| 10  | AGP exp_3   | 4259         | Alpha-1-acid glycoprotein 1 | ENGTISR_6_5_0_2 | 64.2                                    | 0.0              | 5.4            | 0.0              | 100.0            | 0.0               | 97.9           | 0.0              | 0.0            | 0.0              | 0.0            | 0.0              | 43.5           | 0.0              | None                  |
| 11  | AGP exp_4   | 3951         | Alpha-1-acid glycoprotein 1 | ENGTISR_6_5_0_2 | 66.1                                    | 0.0              | 5.6            | 0.0              | 94.2             | 0.0               | 100.0          | 0.0              | 6.8            | 0.0              | 0.0            | 0.0              | 37.5           | 0.0              | None                  |
| 12  | AGP exp_3   | 4070         | Alpha-1-acid glycoprotein 1 | ENGTISR_6_5_0_2 | 0.0                                     | 0.0              | 0.0            | 0.0              | 51.3             | 0.0               | 100.0          | 0.0              | 21.6           | 0.0              | 14.4           | 0.0              | 15.7           | 0.0              | None                  |
| 13  | AGP exp_4   | 4267         | Alpha-1-acid glycoprotein 1 | ENGTISR_6_5_0_2 | 69.5                                    | 0.0              | 7.6            | 0.0              | 100.0            | 0.0               | 48.4           | 0.0              | 0.0            | 0.0              | 0.0            | 0.0              | 35.3           | 0.0              | None                  |
| 14  | AGP exp_4   | 4825         | Alpha-1-acid glycoprotein 1 | ENGTISR_6_5_0_2 | 0.0                                     | 0.0              | 0.0            | 0.0              | 40.3             | 0.0               | 100.0          | 0.0              | 14.5           | 0.0              | 7.5            | 0.0              | 13.3           | 0.0              | None                  |
| 15  | AGP exp_3   | 5053         | Alpha-1-acid glycoprotein 1 | ENGTISR_6_5_0_2 | 86.7                                    | 0.0              | 6.0            | 0.0              | 100.0            | 0.0               | 48.5           | 0.0              | 0.0            | 0.0              | 0.0            | 0.0              | 17.5           | 0.0              | None                  |
| 16  | AGP exp_4   | 4869         | Alpha-1-acid glycoprotein 1 | ENGTISR_6_5_0_3 | 22.2                                    | 0.0              | 0.0            | 0.0              | 100.0            | 0.0               | 42.3           | 0.0              | 5.1            | 0.0              | 0.0            | 0.0              | 17.1           | 0.0              | None                  |
| 17  | AGP exp_4   | 4888         | Alpha-1-acid glycoprotein 1 | ENGTISR_6_5_0_3 | 0.0                                     | 0.0              | 0.0            | 0.0              | 80.2             | 0.0               | 100.0          | 0.0              | 25.8           | 0.0              | 13.8           | 0.0              | 29.9           | 0.0              | None                  |
| 18  | AGP exp_3   | 5086         | Alpha-1-acid glycoprotein 1 | ENGTISR_6_5_0_3 | 0.0                                     | 0.0              | 0.0            | 0.0              | 48.0             | 0.0               | 100.0          | 0.0              | 12.0           | 0.0              | 15.3           | 0.0              | 13.2           | 0.0              | None                  |
| 19  | AGP exp_4   | 6322         | Alpha-1-acid glycoprotein 1 | ENGTISR_6_5_0_3 | 35.4                                    | 0.0              | 0.0            | 0.0              | 100.0            | 9.3               | 35.4           | 0.0              | 0.0            | 0.0              | 0.0            | 0.0              | 33.8           | 0.0              | None                  |
| 20  | AGP exp_4   | 2442         | Alpha-1-acid glycoprotein 1 | ENGTISR_6_5_1_1 | 87.1                                    | 20.6             | 0.0            | 0.0              | 57.8             | 32.7              | 100.0          | 0.0              | 0.0            | 0.0              | 0.0            | 0.0              | 20.5           | 0.0              | Outer                 |
| 21  | AGP exp_3   | 2567         | Alpha-1-acid glycoprotein 1 | ENGTISR_6_5_1_1 | 100.0                                   | 25.5             | 0.0            | 0.0              | 67.9             | 26.3              | 53.4           | 0.0              | 0.0            | 0.0              | 0.0            | 0.0              | 16.4           | 0.0              | Outer                 |
| 22  | AGP exp_4   | 2098         | Alpha-1-acid glycoprotein 1 | ENGTISR_6_5_1_1 | 100.0                                   | 41.7             | 0.0            | 0.0              | 67.0             | 0.0               | 37.8           | 0.0              | 0.0            | 0.0              | 0.0            | 0.0              | 13.8           | 0.0              | Outer                 |
| 23  | AGP exp_3   | 2250         | Alpha-1-acid glycoprotein 1 | ENGTISR_6_5_1_1 | 100.0                                   | 24.7             | 0.0            | 0.0              | 85.0             | 0.0               | 54.5           | 0.0              | 0.0            | 0.0              | 0.0            | 0.0              | 33.3           | 0.0              | Outer                 |
| 24  | AGP exp_3   | 3715         | Alpha-1-acid glycoprotein 1 | ENGTISR_6_5_1_2 | 77.1                                    | 21.7             | 0.0            | 0.0              | 100.0            | 20.9              | 38.9           | 0.0              | 0.0            | 0.0              | 0.0            | 0.0              | 12.4           | 0.0              | Outer                 |
| 25  | AGP exp_4   | 3820         | Alpha-1-acid glycoprotein 1 | ENGTISR_6_5_1_2 | 32.2                                    | 16.0             | 6.4            | 0.0              | 100.0            | 21.8              | 89.7           | 0.0              | 3.2            | 0.0              | 0.0            | 0.0              | 33.2           | 0.0              | Outer                 |

Supplementary Table 2. Continued.

| No. | Experiments | CID Scan No. | N-glycoproteins             | N-glycopeptides | Relative intensities of B/Y series ions |                  |                |                  |                  |                   |                |                  |                |                  |                |                  |                |                  | Manual Classification |
|-----|-------------|--------------|-----------------------------|-----------------|-----------------------------------------|------------------|----------------|------------------|------------------|-------------------|----------------|------------------|----------------|------------------|----------------|------------------|----------------|------------------|-----------------------|
|     |             |              |                             |                 | B <sub>2</sub>                          | B <sub>2</sub> F | B <sub>3</sub> | B <sub>3</sub> F | B <sub>2</sub> S | B <sub>2</sub> SF | Y <sub>1</sub> | Y <sub>1</sub> F | Y <sub>2</sub> | Y <sub>2</sub> F | Y <sub>3</sub> | Y <sub>3</sub> F | Y <sub>4</sub> | Y <sub>4</sub> F |                       |
| 26  | AGP exp_3   | 4074         | Alpha-1-acid glycoprotein 1 | ENGTISR_6_5_1_2 | 70.8                                    | 17.8             | 0.0            | 0.0              | 100.0            | 44.3              | 41.4           | 0.0              | 4.4            | 0.0              | 0.0            | 0.0              | 20.9           | 0.0              | Outer                 |
| 27  | AGP exp_4   | 4161         | Alpha-1-acid glycoprotein 1 | ENGTISR_6_5_1_2 | 68.6                                    | 14.3             | 0.0            | 0.0              | 100.0            | 13.7              | 22.1           | 7.3              | 0.0            | 0.0              | 0.0            | 0.0              | 20.5           | 5.2              | Outer                 |
| 28  | AGP exp_3   | 5005         | Alpha-1-acid glycoprotein 1 | ENGTISR_6_5_1_3 | 20.2                                    | 5.5              | 0.0            | 0.0              | 100.0            | 33.7              | 76.5           | 0.0              | 5.3            | 0.0              | 0.0            | 0.0              | 49.7           | 3.2              | Outer                 |
| 29  | AGP exp_4   | 4831         | Alpha-1-acid glycoprotein 1 | ENGTISR_6_5_1_3 | 19.9                                    | 7.2              | 3.2            | 0.0              | 100.0            | 34.9              | 83.5           | 0.0              | 7.5            | 0.0              | 0.0            | 0.0              | 51.0           | 0.0              | Outer                 |
| 30  | AGP exp_40  | 5698         | Alpha-1-acid glycoprotein 1 | ENGTISR_6_5_2_2 | 66.4                                    | 24.2             | 0.0            | 0.0              | 100.0            | 15.5              | 38.5           | 5.2              | 0.0            | 0.0              | 0.0            | 0.0              | 15.3           | 3.4              | Dual                  |
| 31  | AGP exp_30  | 7912         | Alpha-1-acid glycoprotein 1 | ENGTISR_6_5_2_3 | 6.3                                     | 8.3              | 0.0            | 0.0              | 100.0            | 63.9              | 75.3           | 0.0              | 7.6            | 0.0              | 0.0            | 0.0              | 44.7           | 8.5              | Dual                  |
| 32  | AGP exp_36  | 10024        | Alpha-1-acid glycoprotein 1 | ENGTISR_6_5_2_3 | 9.1                                     | 7.4              | 0.0            | 0.0              | 100.0            | 34.3              | 31.8           | 18.5             | 0.0            | 0.0              | 0.0            | 0.0              | 10.7           | 26.6             | Dual                  |
| 33  | AGP exp_37  | 9868         | Alpha-1-acid glycoprotein 1 | ENGTISR_6_5_2_3 | 0.0                                     | 0.0              | 0.0            | 0.0              | 100.0            | 57.7              | 98.9           | 0.0              | 0.0            | 0.0              | 0.0            | 0.0              | 31.3           | 13.4             | Dual                  |
| 34  | AGP exp_35  | 9853         | Alpha-1-acid glycoprotein 1 | ENGTISR_6_5_2_3 | 0.0                                     | 9.4              | 0.0            | 0.0              | 100.0            | 65.8              | 70.0           | 2.1              | 8.3            | 0.0              | 0.0            | 0.0              | 39.0           | 10.8             | Dual                  |
| 35  | AGP exp_34  | 7974         | Alpha-1-acid glycoprotein 1 | ENGTISR_6_5_2_3 | 0.0                                     | 11.8             | 0.0            | 0.0              | 100.0            | 52.0              | 50.0           | 6.1              | 6.9            | 0.0              | 0.0            | 0.0              | 24.0           | 10.5             | Dual                  |
| 36  | AGP exp_22  | 9866         | Alpha-1-acid glycoprotein 1 | ENGTISR_6_5_2_3 | 7.4                                     | 10.4             | 0.0            | 0.0              | 85.2             | 56.1              | 100.0          | 0.0              | 6.2            | 0.0              | 0.0            | 0.0              | 38.6           | 10.8             | Dual                  |
| 37  | AGP exp_28  | 10186        | Alpha-1-acid glycoprotein 1 | ENGTISR_6_5_2_3 | 5.0                                     | 8.7              | 0.0            | 0.0              | 100.0            | 50.4              | 76.9           | 0.0              | 3.3            | 0.0              | 0.0            | 0.0              | 35.5           | 8.6              | Dual                  |
| 38  | AGP exp_20  | 9990         | Alpha-1-acid glycoprotein 1 | ENGTISR_6_5_2_3 | 8.5                                     | 9.3              | 0.0            | 0.0              | 100.0            | 56.7              | 75.8           | 0.0              | 5.8            | 0.0              | 0.0            | 0.0              | 40.2           | 12.3             | Dual                  |
| 39  | AGP exp_32  | 8077         | Alpha-1-acid glycoprotein 1 | ENGTISR_6_5_2_3 | 6.6                                     | 6.7              | 0.0            | 0.0              | 100.0            | 66.9              | 78.2           | 0.0              | 4.6            | 0.0              | 0.0            | 0.0              | 47.9           | 8.7              | Dual                  |
| 40  | AGP exp_18  | 9968         | Alpha-1-acid glycoprotein 1 | ENGTISR_6_5_2_3 | 7.3                                     | 6.4              | 0.0            | 0.0              | 100.0            | 36.5              | 19.9           | 9.2              | 0.0            | 0.0              | 0.0            | 0.0              | 5.8            | 5.9              | Dual                  |
| 41  | AGP exp_19  | 10035        | Alpha-1-acid glycoprotein 1 | ENGTISR_6_5_2_3 | 8.0                                     | 10.5             | 0.0            | 0.0              | 100.0            | 41.5              | 27.8           | 15.6             | 0.0            | 0.0              | 0.0            | 0.0              | 13.4           | 13.1             | Dual                  |
| 42  | AGP exp_25  | 10759        | Alpha-1-acid glycoprotein 1 | ENGTISR_6_5_2_3 | 15.9                                    | 0.0              | 0.0            | 0.0              | 100.0            | 30.4              | 57.5           | 33.1             | 0.0            | 0.0              | 0.0            | 0.0              | 24.2           | 15.7             | Dual                  |
| 43  | AGP exp_3   | 5059         | Alpha-1-acid glycoprotein 1 | ENGTISR_6_5_2_3 | 0.0                                     | 7.8              | 0.0            | 0.0              | 100.0            | 44.7              | 27.0           | 0.0              | 0.0            | 0.0              | 0.0            | 0.0              | 9.7            | 0.0              | Outer                 |
| 44  | AGP exp_3   | 2283         | Alpha-1-acid glycoprotein 1 | ENGTISR_7_6_1_1 | 100.0                                   | 24.1             | 0.0            | 0.0              | 33.1             | 69.3              | 58.0           | 0.0              | 0.0            | 0.0              | 0.0            | 0.0              | 0.0            | 0.0              | Outer                 |
| 45  | AGP exp_4   | 3157         | Alpha-1-acid glycoprotein 1 | ENGTISR_7_6_1_2 | 22.8                                    | 18.5             | 0.0            | 0.0              | 77.8             | 18.3              | 100.0          | 0.0              | 0.0            | 0.0              | 0.0            | 0.0              | 0.0            | 0.0              | Outer                 |
| 46  | AGP exp_4   | 3437         | Alpha-1-acid glycoprotein 1 | ENGTISR_7_6_1_2 | 22.6                                    | 18.9             | 0.0            | 0.0              | 100.0            | 38.2              | 69.6           | 0.0              | 0.0            | 0.0              | 0.0            | 0.0              | 0.0            | 0.0              | Outer                 |
| 47  | AGP exp_3   | 3935         | Alpha-1-acid glycoprotein 1 | ENGTISR_7_6_1_2 | 28.0                                    | 17.9             | 0.0            | 0.0              | 100.0            | 44.6              | 79.8           | 0.0              | 0.0            | 0.0              | 0.0            | 0.0              | 0.0            | 0.0              | Outer                 |
| 48  | AGP exp_3   | 3613         | Alpha-1-acid glycoprotein 1 | ENGTISR_7_6_1_2 | 21.9                                    | 26.7             | 0.0            | 0.0              | 100.0            | 29.0              | 67.4           | 0.0              | 0.0            | 0.0              | 0.0            | 0.0              | 0.0            | 0.0              | Outer                 |
| 49  | AGP exp_4   | 3719         | Alpha-1-acid glycoprotein 1 | ENGTISR_7_6_1_2 | 18.5                                    | 12.4             | 0.0            | 0.0              | 100.0            | 38.3              | 41.3           | 0.0              | 0.0            | 0.0              | 0.0            | 0.0              | 0.0            | 0.0              | Outer                 |
| 50  | AGP exp_3   | 3281         | Alpha-1-acid glycoprotein 1 | ENGTISR_7_6_1_2 | 32.7                                    | 18.5             | 0.0            | 0.0              | 71.6             | 25.0              | 100.0          | 0.0              | 0.0            | 0.0              | 0.0            | 0.0              | 0.0            | 0.0              | Outer                 |
| 51  | AGP exp_3   | 4937         | Alpha-1-acid glycoprotein 1 | ENGTISR_7_6_1_3 | 59.3                                    | 8.5              | 0.0            | 0.0              | 100.0            | 27.0              | 23.0           | 0.0              | 0.0            | 0.0              | 0.0            | 0.0              | 2.4            | 0.0              | Outer                 |

Supplementary Table 2. Continued.

| No. | Experiments | CID Scan No. | N-glycoproteins             | N-glycopeptides           | Relative intensities of B/Y series ions |                  |                |                  |                  |                   |                |                  |                |                  |                |                  |                |                  | Manual Classification |
|-----|-------------|--------------|-----------------------------|---------------------------|-----------------------------------------|------------------|----------------|------------------|------------------|-------------------|----------------|------------------|----------------|------------------|----------------|------------------|----------------|------------------|-----------------------|
|     |             |              |                             |                           | B <sub>2</sub>                          | B <sub>2</sub> F | B <sub>3</sub> | B <sub>3</sub> F | B <sub>2</sub> S | B <sub>2</sub> SF | Y <sub>1</sub> | Y <sub>1</sub> F | Y <sub>2</sub> | Y <sub>2</sub> F | Y <sub>3</sub> | Y <sub>3</sub> F | Y <sub>4</sub> | Y <sub>4</sub> F |                       |
| 52  | AGP exp_3   | 6409         | Alpha-1-acid glycoprotein 1 | ENGTISR_7_6_1_4           | 18.4                                    | 2.9              | 0.0            | 0.0              | 100.0            | 27.8              | 14.3           | 0.0              | 0.0            | 0.0              | 0.0            | 0.0              | 2.6            | 0.0              | Outer                 |
| 53  | AGP exp_4   | 6024         | Alpha-1-acid glycoprotein 1 | ENGTISR_7_6_1_4           | 26.6                                    | 2.6              | 0.0            | 0.0              | 100.0            | 24.9              | 9.1            | 0.0              | 0.0            | 0.0              | 0.0            | 0.0              | 5.7            | 0.0              | Outer                 |
| 54  | AGP exp_3   | 6155         | Alpha-1-acid glycoprotein 1 | ENGTISR_7_6_2_4           | 30.5                                    | 7.0              | 0.0            | 0.0              | 100.0            | 74.0              | 15.0           | 0.0              | 0.0            | 0.0              | 0.0            | 0.0              | 0.0            | 0.0              | Outer                 |
| 55  | AGP exp_4   | 21712        | Alpha-1-acid glycoprotein 1 | LVPVPITNATLDQITGK_5_4_0_2 | 0.0                                     | 0.0              | 0.0            | 0.0              | 100.0            | 0.0               | 74.3           | 0.0              | 9.5            | 0.0              | 9.2            | 0.0              | 27.5           | 0.0              | None                  |
| 56  | AGP exp_3   | 22375        | Alpha-1-acid glycoprotein 1 | LVPVPITNATLDQITGK_5_4_0_2 | 0.0                                     | 0.0              | 0.0            | 0.0              | 100.0            | 0.0               | 66.7           | 0.0              | 11.7           | 0.0              | 12.8           | 0.0              | 38.4           | 0.0              | None                  |
| 57  | AGP exp_4   | 22014        | Alpha-1-acid glycoprotein 1 | LVPVPITNATLDQITGK_5_4_0_2 | 0.0                                     | 0.0              | 0.0            | 0.0              | 100.0            | 0.0               | 76.9           | 0.0              | 9.8            | 0.0              | 12.9           | 0.0              | 55.0           | 0.0              | None                  |
| 58  | AGP exp_4   | 21900        | Alpha-1-acid glycoprotein 1 | LVPVPITNATLDQITGK_5_4_0_2 | 62.1                                    | 0.0              | 3.4            | 0.0              | 100.0            | 0.0               | 4.8            | 0.0              | 6.4            | 0.0              | 18.5           | 0.0              | 96.1           | 0.0              | None                  |
| 59  | AGP exp_3   | 21916        | Alpha-1-acid glycoprotein 1 | LVPVPITNATLDQITGK_5_4_0_2 | 66.5                                    | 0.0              | 5.9            | 0.0              | 100.0            | 0.0               | 0.0            | 0.0              | 11.0           | 0.0              | 17.9           | 0.0              | 88.7           | 0.0              | None                  |
| 60  | AGP exp_3   | 22208        | Alpha-1-acid glycoprotein 1 | LVPVPITNATLDQITGK_5_4_0_2 | 71.9                                    | 0.0              | 7.0            | 0.0              | 100.0            | 0.0               | 0.0            | 0.0              | 0.0            | 0.0              | 15.1           | 0.0              | 77.6           | 0.0              | None                  |
| 61  | AGP exp_4   | 17971        | Alpha-1-acid glycoprotein 1 | LVPVPITNATLDQITGK_6_5_0_1 | 0.0                                     | 0.0              | 0.0            | 0.0              | 48.8             | 0.0               | 100.0          | 0.0              | 6.7            | 0.0              | 9.6            | 0.0              | 33.3           | 0.0              | None                  |
| 62  | AGP exp_4   | 18169        | Alpha-1-acid glycoprotein 1 | LVPVPITNATLDQITGK_6_5_0_1 | 100.0                                   | 0.0              | 8.6            | 0.0              | 48.1             | 0.0               | 43.3           | 0.0              | 8.3            | 0.0              | 16.0           | 0.0              | 62.9           | 0.0              | None                  |
| 63  | AGP exp_3   | 18255        | Alpha-1-acid glycoprotein 1 | LVPVPITNATLDQITGK_6_5_0_1 | 100.0                                   | 0.0              | 6.7            | 0.0              | 60.5             | 0.0               | 37.2           | 0.0              | 0.0            | 0.0              | 17.3           | 0.0              | 55.2           | 0.0              | None                  |
| 64  | AGP exp_3   | 18568        | Alpha-1-acid glycoprotein 1 | LVPVPITNATLDQITGK_6_5_0_1 | 100.0                                   | 0.0              | 4.8            | 0.0              | 30.7             | 0.0               | 46.0           | 0.0              | 8.0            | 0.0              | 10.2           | 0.0              | 66.1           | 0.0              | None                  |
| 65  | AGP exp_3   | 21756        | Alpha-1-acid glycoprotein 1 | LVPVPITNATLDQITGK_6_5_0_2 | 0.0                                     | 0.0              | 0.0            | 0.0              | 89.1             | 0.0               | 100.0          | 0.0              | 8.7            | 0.0              | 18.8           | 0.0              | 75.6           | 0.0              | None                  |
| 66  | AGP exp_3   | 21804        | Alpha-1-acid glycoprotein 1 | LVPVPITNATLDQITGK_6_5_0_2 | 71.4                                    | 0.0              | 6.2            | 0.0              | 100.0            | 0.0               | 53.2           | 0.0              | 5.3            | 0.0              | 16.5           | 0.0              | 51.9           | 0.0              | None                  |
| 67  | AGP exp_3   | 21566        | Alpha-1-acid glycoprotein 1 | LVPVPITNATLDQITGK_6_5_0_2 | 72.9                                    | 0.0              | 7.9            | 0.0              | 100.0            | 0.0               | 54.4           | 0.0              | 0.0            | 0.0              | 16.7           | 0.0              | 57.0           | 0.0              | None                  |
| 68  | AGP exp_4   | 21554        | Alpha-1-acid glycoprotein 1 | LVPVPITNATLDQITGK_6_5_0_2 | 71.8                                    | 0.0              | 6.6            | 0.0              | 100.0            | 0.0               | 49.6           | 0.0              | 0.0            | 0.0              | 18.5           | 0.0              | 47.9           | 0.0              | None                  |
| 69  | AGP exp_3   | 22024        | Alpha-1-acid glycoprotein 1 | LVPVPITNATLDQITGK_6_5_0_2 | 39.4                                    | 0.0              | 6.3            | 0.0              | 100.0            | 0.0               | 61.3           | 0.0              | 3.5            | 0.0              | 17.6           | 0.0              | 64.8           | 0.0              | None                  |
| 70  | AGP exp_4   | 21868        | Alpha-1-acid glycoprotein 1 | LVPVPITNATLDQITGK_6_5_0_2 | 62.6                                    | 0.0              | 0.0            | 0.0              | 100.0            | 0.0               | 39.3           | 0.0              | 0.0            | 0.0              | 15.4           | 0.0              | 44.0           | 0.0              | None                  |
| 71  | AGP exp_4   | 24860        | Alpha-1-acid glycoprotein 1 | LVPVPITNATLDQITGK_6_5_0_3 | 0.0                                     | 0.0              | 0.0            | 0.0              | 100.0            | 0.0               | 62.8           | 0.0              | 6.9            | 0.0              | 7.2            | 0.0              | 20.3           | 0.0              | None                  |
| 72  | AGP exp_3   | 25815        | Alpha-1-acid glycoprotein 1 | LVPVPITNATLDQITGK_6_5_0_3 | 0.0                                     | 0.0              | 0.0            | 0.0              | 100.0            | 0.0               | 51.4           | 0.0              | 7.5            | 0.0              | 9.2            | 0.0              | 24.5           | 0.0              | None                  |
| 73  | AGP exp_3   | 25633        | Alpha-1-acid glycoprotein 1 | LVPVPITNATLDQITGK_6_5_0_3 | 28.4                                    | 0.0              | 0.0            | 0.0              | 100.0            | 0.0               | 36.1           | 0.0              | 4.8            | 0.0              | 4.3            | 0.0              | 31.0           | 0.0              | None                  |
| 74  | AGP exp_3   | 25301        | Alpha-1-acid glycoprotein 1 | LVPVPITNATLDQITGK_6_5_0_3 | 30.8                                    | 0.0              | 2.8            | 0.0              | 100.0            | 0.0               | 41.3           | 0.0              | 7.1            | 0.0              | 8.2            | 0.0              | 31.1           | 0.0              | None                  |
| 75  | AGP exp_3   | 25591        | Alpha-1-acid glycoprotein 1 | LVPVPITNATLDQITGK_6_5_0_3 | 31.1                                    | 0.0              | 3.1            | 0.0              | 100.0            | 0.0               | 35.5           | 0.0              | 4.7            | 0.0              | 8.4            | 0.0              | 38.6           | 0.0              | None                  |
| 76  | AGP exp_4   | 24579        | Alpha-1-acid glycoprotein 1 | LVPVPITNATLDQITGK_6_5_0_3 | 0.0                                     | 0.0              | 0.0            | 0.0              | 100.0            | 0.0               | 50.1           | 0.0              | 5.4            | 0.0              | 7.9            | 0.0              | 11.0           | 0.0              | None                  |
| 77  | AGP exp_4   | 24847        | Alpha-1-acid glycoprotein 1 | LVPVPITNATLDQITGK_6_5_0_3 | 30.4                                    | 0.0              | 2.5            | 0.0              | 100.0            | 0.0               | 34.3           | 0.0              | 6.0            | 0.0              | 8.3            | 0.0              | 29.9           | 0.0              | None                  |

Supplementary Table 2. Continued.

| No. | Experiments | CID Scan No. | N-glycoproteins             | N-glycopeptides           | Relative intensities of B/Y series ions |                  |                |                  |                  |                   |                |                  |                |                  |                |                  |                |                  | Manual Classification |
|-----|-------------|--------------|-----------------------------|---------------------------|-----------------------------------------|------------------|----------------|------------------|------------------|-------------------|----------------|------------------|----------------|------------------|----------------|------------------|----------------|------------------|-----------------------|
|     |             |              |                             |                           | B <sub>2</sub>                          | B <sub>2</sub> F | B <sub>3</sub> | B <sub>3</sub> F | B <sub>2</sub> S | B <sub>2</sub> SF | Y <sub>1</sub> | Y <sub>1</sub> F | Y <sub>2</sub> | Y <sub>2</sub> F | Y <sub>3</sub> | Y <sub>3</sub> F | Y <sub>4</sub> | Y <sub>4</sub> F |                       |
| 78  | AGP exp_4   | 25276        | Alpha-1-acid glycoprotein 1 | LVPVPITNATLDQITGK_6_5_0_3 | 32.1                                    | 0.0              | 2.6            | 0.0              | 100.0            | 0.0               | 32.7           | 0.0              | 7.7            | 0.0              | 6.7            | 0.0              | 37.2           | 0.0              | None                  |
| 79  | AGP exp_4   | 25139        | Alpha-1-acid glycoprotein 1 | LVPVPITNATLDQITGK_6_5_0_3 | 17.2                                    | 0.0              | 3.9            | 0.0              | 100.0            | 0.0               | 35.8           | 0.0              | 5.7            | 0.0              | 7.2            | 0.0              | 36.9           | 0.0              | None                  |
| 80  | AGP exp_3   | 25817        | Alpha-1-acid glycoprotein 1 | LVPVPITNATLDQITGK_6_5_0_3 | 27.4                                    | 0.0              | 0.0            | 0.0              | 100.0            | 0.0               | 32.8           | 0.0              | 7.2            | 0.0              | 6.0            | 0.0              | 32.1           | 0.0              | None                  |
| 81  | AGP exp_4   | 18062        | Alpha-1-acid glycoprotein 1 | LVPVPITNATLDQITGK_6_5_1_1 | 0.0                                     | 14.2             | 0.0            | 0.0              | 44.6             | 30.8              | 100.0          | 0.0              | 9.9            | 0.0              | 12.8           | 0.0              | 35.5           | 0.0              | Outer                 |
| 82  | AGP exp_3   | 18440        | Alpha-1-acid glycoprotein 1 | LVPVPITNATLDQITGK_6_5_1_1 | 0.0                                     | 14.1             | 0.0            | 0.0              | 43.2             | 44.0              | 100.0          | 0.0              | 12.4           | 0.0              | 19.7           | 0.0              | 41.7           | 0.0              | Outer                 |
| 83  | AGP exp_4   | 18128        | Alpha-1-acid glycoprotein 1 | LVPVPITNATLDQITGK_6_5_1_1 | 100.0                                   | 12.3             | 8.7            | 0.0              | 30.8             | 19.1              | 24.5           | 0.0              | 0.0            | 0.0              | 9.7            | 0.0              | 38.2           | 0.0              | Outer                 |
| 84  | AGP exp_4   | 21470        | Alpha-1-acid glycoprotein 1 | LVPVPITNATLDQITGK_6_5_1_2 | 0.0                                     | 11.6             | 0.0            | 0.0              | 100.0            | 53.2              | 96.8           | 0.0              | 10.3           | 0.0              | 0.0            | 0.0              | 31.4           | 0.0              | Outer                 |
| 85  | AGP exp_3   | 21715        | Alpha-1-acid glycoprotein 1 | LVPVPITNATLDQITGK_6_5_1_2 | 0.0                                     | 9.8              | 0.0            | 0.0              | 100.0            | 50.3              | 97.5           | 0.0              | 0.0            | 0.0              | 0.0            | 0.0              | 36.8           | 0.0              | Outer                 |
| 86  | AGP exp_3   | 22028        | Alpha-1-acid glycoprotein 1 | LVPVPITNATLDQITGK_6_5_1_2 | 0.0                                     | 0.0              | 0.0            | 0.0              | 100.0            | 49.9              | 62.6           | 0.0              | 6.6            | 0.0              | 0.0            | 0.0              | 30.2           | 0.0              | Outer                 |
| 87  | AGP exp_4   | 21473        | Alpha-1-acid glycoprotein 1 | LVPVPITNATLDQITGK_6_5_1_2 | 62.9                                    | 14.1             | 7.1            | 0.0              | 100.0            | 34.9              | 45.7           | 0.0              | 8.9            | 0.0              | 11.5           | 0.0              | 56.6           | 5.0              | Outer                 |
| 88  | AGP exp_3   | 21787        | Alpha-1-acid glycoprotein 1 | LVPVPITNATLDQITGK_6_5_1_2 | 67.9                                    | 17.2             | 7.1            | 0.0              | 100.0            | 35.1              | 57.6           | 0.0              | 10.3           | 0.0              | 26.1           | 0.0              | 64.9           | 4.7              | Outer                 |
| 89  | AGP exp_4   | 24923        | Alpha-1-acid glycoprotein 1 | LVPVPITNATLDQITGK_6_5_1_3 | 0.0                                     | 0.0              | 0.0            | 0.0              | 100.0            | 35.4              | 62.2           | 0.0              | 0.0            | 0.0              | 10.1           | 0.0              | 26.4           | 0.0              | Outer                 |
| 90  | AGP exp_4   | 25175        | Alpha-1-acid glycoprotein 1 | LVPVPITNATLDQITGK_6_5_1_3 | 0.0                                     | 0.0              | 0.0            | 0.0              | 100.0            | 33.5              | 47.2           | 0.0              | 0.0            | 0.0              | 11.8           | 0.0              | 35.2           | 0.0              | Outer                 |
| 91  | AGP exp_3   | 25409        | Alpha-1-acid glycoprotein 1 | LVPVPITNATLDQITGK_6_5_1_3 | 0.0                                     | 0.0              | 0.0            | 0.0              | 100.0            | 37.8              | 66.5           | 0.0              | 0.0            | 0.0              | 7.9            | 0.0              | 30.7           | 0.0              | Outer                 |
| 92  | AGP exp_3   | 25437        | Alpha-1-acid glycoprotein 1 | LVPVPITNATLDQITGK_6_5_1_3 | 30.7                                    | 6.4              | 3.2            | 0.0              | 100.0            | 28.1              | 44.7           | 0.0              | 5.6            | 0.0              | 10.5           | 0.0              | 30.3           | 0.0              | Outer                 |
| 93  | AGP exp_3   | 25420        | Alpha-1-acid glycoprotein 1 | LVPVPITNATLDQITGK_6_5_1_3 | 0.0                                     | 0.0              | 0.0            | 0.0              | 100.0            | 35.7              | 63.0           | 0.0              | 6.8            | 0.0              | 8.9            | 0.0              | 29.0           | 0.0              | Outer                 |
| 94  | AGP exp_3   | 25702        | Alpha-1-acid glycoprotein 1 | LVPVPITNATLDQITGK_6_5_1_3 | 0.0                                     | 8.9              | 0.0            | 0.0              | 100.0            | 34.4              | 51.9           | 0.0              | 0.0            | 0.0              | 12.7           | 0.0              | 28.9           | 0.0              | Outer                 |
| 95  | AGP exp_3   | 25364        | Alpha-1-acid glycoprotein 1 | LVPVPITNATLDQITGK_6_5_1_3 | 31.5                                    | 5.8              | 3.3            | 0.0              | 100.0            | 30.1              | 43.8           | 0.0              | 6.4            | 0.0              | 10.9           | 0.0              | 39.2           | 0.0              | Outer                 |
| 96  | AGP exp_3   | 25708        | Alpha-1-acid glycoprotein 1 | LVPVPITNATLDQITGK_6_5_1_3 | 27.6                                    | 0.0              | 0.0            | 0.0              | 100.0            | 36.5              | 14.4           | 0.0              | 0.0            | 0.0              | 7.5            | 0.0              | 35.8           | 0.0              | Outer                 |
| 97  | AGP exp_4   | 24925        | Alpha-1-acid glycoprotein 1 | LVPVPITNATLDQITGK_6_5_1_3 | 29.1                                    | 5.7              | 3.6            | 0.0              | 100.0            | 25.9              | 37.7           | 0.0              | 6.2            | 0.0              | 11.7           | 0.0              | 35.9           | 0.0              | Outer                 |
| 98  | AGP exp_4   | 25177        | Alpha-1-acid glycoprotein 1 | LVPVPITNATLDQITGK_6_5_1_3 | 29.6                                    | 0.0              | 0.0            | 0.0              | 100.0            | 22.4              | 24.7           | 0.0              | 3.4            | 0.0              | 13.4           | 0.0              | 36.5           | 0.0              | Outer                 |
| 99  | AGP exp_18  | 35503        | Alpha-1-acid glycoprotein 1 | LVPVPITNATLDQITGK_6_5_2_2 | 0.0                                     | 20.9             | 0.0            | 0.0              | 100.0            | 57.5              | 72.5           | 0.0              | 0.0            | 0.0              | 0.0            | 0.0              | 20.5           | 16.7             | Dual                  |
| 100 | AGP exp_7   | 29857        | Alpha-1-acid glycoprotein 1 | LVPVPITNATLDQITGK_6_5_2_3 | 25.5                                    | 13.9             | 4.1            | 0.0              | 100.0            | 46.5              | 26.4           | 0.0              | 0.0            | 0.0              | 5.2            | 0.0              | 28.1           | 8.8              | Dual                  |
| 101 | AGP exp_38  | 32062        | Alpha-1-acid glycoprotein 1 | LVPVPITNATLDQITGK_6_5_2_3 | 24.4                                    | 0.0              | 0.0            | 0.0              | 100.0            | 23.7              | 10.6           | 10.0             | 2.5            | 0.0              | 0.0            | 0.0              | 0.0            | 0.0              | Dual                  |
| 102 | AGP exp_32  | 29837        | Alpha-1-acid glycoprotein 1 | LVPVPITNATLDQITGK_6_5_2_3 | 30.4                                    | 10.0             | 0.0            | 0.0              | 100.0            | 22.7              | 0.0            | 0.0              | 0.0            | 0.0              | 0.0            | 0.0              | 5.6            | 27.6             | Dual                  |
| 103 | AGP exp_30  | 27103        | Alpha-1-acid glycoprotein 1 | LVPVPITNATLDQITGK_6_5_2_3 | 29.9                                    | 0.0              | 0.0            | 0.0              | 100.0            | 39.0              | 0.0            | 0.0              | 0.0            | 0.0              | 0.0            | 0.0              | 9.8            | 37.5             | Dual                  |



Supplementary Table 2. Continued.

| No. | Experiments | CID Scan No. | N-glycoproteins               | N-glycopeptides | Relative intensities of B/Y series ions |                  |                |                  |                  |                   |                |                  |                |                  |                |                  |                |                  | Manual Classification |
|-----|-------------|--------------|-------------------------------|-----------------|-----------------------------------------|------------------|----------------|------------------|------------------|-------------------|----------------|------------------|----------------|------------------|----------------|------------------|----------------|------------------|-----------------------|
|     |             |              |                               |                 | B <sub>2</sub>                          | B <sub>2</sub> F | B <sub>3</sub> | B <sub>3</sub> F | B <sub>2</sub> S | B <sub>2</sub> SF | Y <sub>1</sub> | Y <sub>1</sub> F | Y <sub>2</sub> | Y <sub>2</sub> F | Y <sub>3</sub> | Y <sub>3</sub> F | Y <sub>4</sub> | Y <sub>4</sub> F |                       |
| 104 | AGP exp_4   | 1589         | Alpha-1-acid glycoprotein 1,2 | NEEYNK_4_3_0_0  | 48.1                                    | 0.0              | 11.2           | 0.0              | 0.0              | 0.0               | 100.0          | 0.0              | 3.4            | 0.0              | 9.0            | 0.0              | 71.9           | 0.0              | None                  |
| 105 | AGP exp_3   | 1567         | Alpha-1-acid glycoprotein 1,2 | NEEYNK_4_3_0_0  | 65.3                                    | 0.0              | 8.3            | 0.0              | 0.0              | 0.0               | 100.0          | 0.0              | 9.7            | 0.0              | 5.4            | 0.0              | 63.7           | 0.0              | None                  |
| 106 | AGP exp_4   | 1966         | Alpha-1-acid glycoprotein 1,2 | NEEYNK_4_3_0_1  | 27.7                                    | 0.0              | 5.8            | 0.0              | 32.0             | 0.0               | 100.0          | 0.0              | 5.4            | 0.0              | 4.1            | 0.0              | 73.2           | 0.0              | None                  |
| 107 | AGP exp_3   | 1408         | Alpha-1-acid glycoprotein 1,2 | NEEYNK_4_3_0_1  | 16.7                                    | 0.0              | 0.0            | 0.0              | 12.2             | 0.0               | 33.1           | 0.0              | 13.5           | 0.0              | 9.2            | 0.0              | 100.0          | 0.0              | None                  |
| 108 | AGP exp_3   | 1944         | Alpha-1-acid glycoprotein 1,2 | NEEYNK_4_3_0_1  | 15.2                                    | 0.0              | 6.7            | 0.0              | 38.2             | 0.0               | 100.0          | 0.0              | 4.6            | 0.0              | 6.0            | 0.0              | 69.5           | 0.0              | None                  |
| 109 | AGP exp_4   | 1425         | Alpha-1-acid glycoprotein 1,2 | NEEYNK_4_3_0_1  | 12.5                                    | 0.0              | 0.0            | 0.0              | 31.7             | 0.0               | 20.1           | 0.0              | 5.0            | 0.0              | 4.5            | 0.0              | 100.0          | 0.0              | None                  |
| 110 | AGP exp_4   | 1549         | Alpha-1-acid glycoprotein 1,2 | NEEYNK_4_4_0_1  | 36.0                                    | 0.0              | 0.0            | 0.0              | 54.5             | 0.0               | 100.0          | 0.0              | 14.1           | 0.0              | 58.0           | 0.0              | 46.2           | 0.0              | None                  |
| 111 | AGP exp_4   | 1798         | Alpha-1-acid glycoprotein 1,2 | NEEYNK_4_4_0_1  | 17.0                                    | 0.0              | 4.0            | 0.0              | 31.5             | 0.0               | 100.0          | 0.0              | 12.8           | 0.0              | 18.5           | 0.0              | 46.4           | 0.0              | None                  |
| 112 | AGP exp_3   | 1787         | Alpha-1-acid glycoprotein 1,2 | NEEYNK_4_4_0_1  | 11.5                                    | 0.0              | 7.7            | 0.0              | 24.8             | 0.0               | 100.0          | 0.0              | 12.0           | 0.0              | 15.9           | 0.0              | 46.4           | 0.0              | None                  |
| 113 | AGP exp_3   | 1532         | Alpha-1-acid glycoprotein 1,2 | NEEYNK_4_4_0_1  | 37.3                                    | 0.0              | 0.0            | 0.0              | 61.7             | 0.0               | 100.0          | 0.0              | 34.6           | 0.0              | 71.6           | 0.0              | 79.1           | 0.0              | None                  |
| 114 | AGP exp_3   | 2054         | Alpha-1-acid glycoprotein 1,2 | NEEYNK_4_4_0_1  | 53.2                                    | 0.0              | 0.0            | 0.0              | 48.5             | 0.0               | 100.0          | 0.0              | 0.0            | 0.0              | 34.8           | 0.0              | 51.4           | 0.0              | None                  |
| 115 | AGP exp_3   | 1357         | Alpha-1-acid glycoprotein 1,2 | NEEYNK_5_4_0_0  | 76.2                                    | 0.0              | 12.4           | 0.0              | 0.0              | 0.0               | 100.0          | 0.0              | 0.0            | 0.0              | 4.6            | 0.0              | 46.3           | 0.0              | None                  |
| 116 | AGP exp_4   | 1370         | Alpha-1-acid glycoprotein 1,2 | NEEYNK_5_4_0_0  | 52.4                                    | 0.0              | 14.2           | 0.0              | 0.0              | 0.0               | 100.0          | 0.0              | 0.0            | 0.0              | 21.5           | 0.0              | 29.9           | 0.0              | None                  |
| 117 | AGP exp_3   | 1780         | Alpha-1-acid glycoprotein 1,2 | NEEYNK_5_4_0_1  | 100.0                                   | 0.0              | 7.1            | 0.0              | 68.9             | 0.0               | 44.6           | 0.0              | 0.0            | 0.0              | 0.0            | 0.0              | 32.2           | 0.0              | None                  |
| 118 | AGP exp_3   | 2771         | Alpha-1-acid glycoprotein 1,2 | NEEYNK_5_4_0_1  | 100.0                                   | 0.0              | 12.0           | 0.0              | 59.5             | 0.0               | 41.4           | 0.0              | 0.0            | 0.0              | 0.0            | 0.0              | 19.9           | 0.0              | None                  |
| 119 | AGP exp_4   | 1807         | Alpha-1-acid glycoprotein 1,2 | NEEYNK_5_4_0_1  | 100.0                                   | 0.0              | 6.7            | 0.0              | 49.5             | 0.0               | 50.4           | 0.0              | 0.0            | 0.0              | 4.4            | 0.0              | 39.3           | 0.0              | None                  |
| 120 | AGP exp_3   | 2047         | Alpha-1-acid glycoprotein 1,2 | NEEYNK_5_4_0_1  | 0.0                                     | 0.0              | 7.4            | 0.0              | 26.4             | 0.0               | 100.0          | 0.0              | 18.8           | 0.0              | 11.3           | 0.0              | 36.3           | 0.0              | None                  |
| 121 | AGP exp_4   | 1800         | Alpha-1-acid glycoprotein 1,2 | NEEYNK_5_4_0_1  | 0.0                                     | 0.0              | 5.9            | 0.0              | 25.6             | 0.0               | 100.0          | 0.0              | 29.0           | 0.0              | 15.1           | 0.0              | 42.6           | 0.0              | None                  |
| 122 | AGP exp_4   | 1551         | Alpha-1-acid glycoprotein 1,2 | NEEYNK_5_4_0_1  | 100.0                                   | 0.0              | 13.1           | 0.0              | 72.8             | 0.0               | 27.9           | 0.0              | 0.0            | 0.0              | 0.0            | 0.0              | 5.4            | 0.0              | None                  |
| 123 | AGP exp_3   | 1778         | Alpha-1-acid glycoprotein 1,2 | NEEYNK_5_4_0_1  | 0.0                                     | 0.0              | 7.2            | 0.0              | 27.5             | 0.0               | 100.0          | 0.0              | 20.2           | 0.0              | 13.2           | 0.0              | 36.9           | 0.0              | None                  |
| 124 | AGP exp_4   | 1546         | Alpha-1-acid glycoprotein 1,2 | NEEYNK_5_4_0_1  | 0.0                                     | 0.0              | 0.0            | 0.0              | 54.2             | 0.0               | 100.0          | 0.0              | 10.7           | 0.0              | 10.6           | 0.0              | 21.3           | 0.0              | None                  |
| 125 | AGP exp_3   | 2936         | Alpha-1-acid glycoprotein 1,2 | NEEYNK_5_4_0_1  | 0.0                                     | 0.0              | 5.6            | 0.0              | 30.8             | 0.0               | 100.0          | 0.0              | 12.0           | 0.0              | 9.5            | 0.0              | 35.5           | 0.0              | None                  |
| 126 | AGP exp_4   | 2035         | Alpha-1-acid glycoprotein 1,2 | NEEYNK_5_4_0_1  | 0.0                                     | 0.0              | 5.0            | 0.0              | 32.5             | 0.0               | 100.0          | 0.0              | 19.4           | 0.0              | 8.8            | 0.0              | 41.3           | 0.0              | None                  |
| 127 | AGP exp_3   | 3261         | Alpha-1-acid glycoprotein 1,2 | NEEYNK_5_4_0_1  | 0.0                                     | 0.0              | 17.2           | 0.0              | 61.0             | 0.0               | 100.0          | 0.0              | 8.9            | 0.0              | 16.1           | 0.0              | 59.4           | 0.0              | None                  |
| 128 | AGP exp_3   | 2261         | Alpha-1-acid glycoprotein 1,2 | NEEYNK_5_4_0_1  | 0.0                                     | 0.0              | 8.2            | 0.0              | 58.0             | 0.0               | 100.0          | 0.0              | 18.1           | 0.0              | 12.2           | 0.0              | 51.1           | 0.0              | None                  |
| 129 | AGP exp_4   | 2401         | Alpha-1-acid glycoprotein 1,2 | NEEYNK_5_4_0_1  | 0.0                                     | 0.0              | 21.4           | 0.0              | 53.9             | 0.0               | 100.0          | 0.0              | 21.0           | 0.0              | 0.0            | 0.0              | 30.0           | 0.0              | None                  |

Supplementary Table 2. Continued.

| No. | Experiments | CID Scan No. | N-glycoproteins               | N-glycopeptides | Relative intensities of B/Y series ions |                  |                |                  |                  |                   |                |                  |                |                  |                |                  |                |                  | Manual Classification |
|-----|-------------|--------------|-------------------------------|-----------------|-----------------------------------------|------------------|----------------|------------------|------------------|-------------------|----------------|------------------|----------------|------------------|----------------|------------------|----------------|------------------|-----------------------|
|     |             |              |                               |                 | B <sub>2</sub>                          | B <sub>2</sub> F | B <sub>3</sub> | B <sub>3</sub> F | B <sub>2</sub> S | B <sub>2</sub> SF | Y <sub>1</sub> | Y <sub>1</sub> F | Y <sub>2</sub> | Y <sub>2</sub> F | Y <sub>3</sub> | Y <sub>3</sub> F | Y <sub>4</sub> | Y <sub>4</sub> F |                       |
| 130 | AGP exp_4   | 2242         | Alpha-1-acid glycoprotein 1,2 | NEEYNK_5_4_0_1  | 0.0                                     | 0.0              | 5.1            | 0.0              | 39.4             | 0.0               | 100.0          | 0.0              | 12.0           | 0.0              | 4.2            | 0.0              | 28.1           | 0.0              | None                  |
| 131 | AGP exp_3   | 2809         | Alpha-1-acid glycoprotein 1,2 | NEEYNK_5_4_0_2  | 55.0                                    | 0.0              | 5.8            | 0.0              | 100.0            | 0.0               | 0.0            | 0.0              | 4.1            | 0.0              | 7.1            | 0.0              | 37.3           | 0.0              | None                  |
| 132 | AGP exp_3   | 3521         | Alpha-1-acid glycoprotein 1,2 | NEEYNK_5_4_0_2  | 51.9                                    | 0.0              | 4.9            | 0.0              | 100.0            | 0.0               | 0.0            | 0.0              | 4.0            | 0.0              | 5.3            | 0.0              | 41.3           | 0.0              | None                  |
| 133 | AGP exp_3   | 3173         | Alpha-1-acid glycoprotein 1,2 | NEEYNK_5_4_0_2  | 54.8                                    | 0.0              | 5.1            | 0.0              | 100.0            | 0.0               | 0.0            | 0.0              | 4.2            | 0.0              | 7.2            | 0.0              | 37.3           | 0.0              | None                  |
| 134 | AGP exp_4   | 2755         | Alpha-1-acid glycoprotein 1,2 | NEEYNK_5_4_0_2  | 57.4                                    | 0.0              | 5.5            | 0.0              | 100.0            | 0.0               | 0.0            | 0.0              | 4.9            | 0.0              | 8.3            | 0.0              | 41.9           | 0.0              | None                  |
| 135 | AGP exp_4   | 3183         | Alpha-1-acid glycoprotein 1,2 | NEEYNK_5_4_0_2  | 0.0                                     | 0.0              | 2.9            | 0.0              | 36.5             | 0.0               | 100.0          | 0.0              | 12.0           | 0.0              | 7.9            | 0.0              | 22.6           | 0.0              | None                  |
| 136 | AGP exp_4   | 3580         | Alpha-1-acid glycoprotein 1,2 | NEEYNK_5_4_0_2  | 56.8                                    | 0.0              | 6.0            | 0.0              | 100.0            | 0.0               | 0.0            | 0.0              | 0.0            | 0.0              | 5.2            | 0.0              | 31.8           | 0.0              | None                  |
| 137 | AGP exp_3   | 2809         | Alpha-1-acid glycoprotein 1,2 | NEEYNK_5_4_0_2  | 55.0                                    | 0.0              | 5.8            | 0.0              | 100.0            | 0.0               | 0.0            | 0.0              | 4.1            | 0.0              | 7.1            | 0.0              | 37.3           | 0.0              | None                  |
| 138 | AGP exp_4   | 3294         | Alpha-1-acid glycoprotein 1,2 | NEEYNK_5_4_0_2  | 55.3                                    | 0.0              | 4.4            | 0.0              | 100.0            | 0.0               | 0.0            | 0.0              | 0.0            | 0.0              | 7.7            | 0.0              | 43.0           | 0.0              | None                  |
| 139 | AGP exp_3   | 3360         | Alpha-1-acid glycoprotein 1,2 | NEEYNK_5_4_0_2  | 0.0                                     | 0.0              | 4.1            | 0.0              | 50.0             | 0.0               | 100.0          | 0.0              | 18.7           | 0.0              | 9.2            | 0.0              | 35.1           | 0.0              | None                  |
| 140 | AGP exp_3   | 3834         | Alpha-1-acid glycoprotein 1,2 | NEEYNK_5_4_0_2  | 54.1                                    | 0.0              | 4.5            | 0.0              | 100.0            | 0.0               | 0.0            | 0.0              | 0.0            | 0.0              | 3.5            | 0.0              | 28.2           | 0.0              | None                  |
| 141 | AGP exp_4   | 2755         | Alpha-1-acid glycoprotein 1,2 | NEEYNK_5_4_0_2  | 57.4                                    | 0.0              | 5.5            | 0.0              | 100.0            | 0.0               | 0.0            | 0.0              | 4.9            | 0.0              | 8.3            | 0.0              | 41.9           | 0.0              | None                  |
| 142 | AGP exp_3   | 2718         | Alpha-1-acid glycoprotein 1,2 | NEEYNK_5_4_0_2  | 0.0                                     | 0.0              | 0.0            | 0.0              | 80.7             | 0.0               | 100.0          | 0.0              | 9.4            | 0.0              | 9.0            | 0.0              | 43.4           | 0.0              | None                  |
| 143 | AGP exp_3   | 4731         | Alpha-1-acid glycoprotein 1,2 | NEEYNK_5_4_0_2  | 0.0                                     | 0.0              | 0.0            | 0.0              | 62.5             | 0.0               | 100.0          | 0.0              | 9.3            | 0.0              | 3.7            | 0.0              | 28.8           | 0.0              | None                  |
| 144 | AGP exp_4   | 3485         | Alpha-1-acid glycoprotein 1,2 | NEEYNK_5_4_0_2  | 0.0                                     | 0.0              | 6.0            | 0.0              | 50.9             | 0.0               | 100.0          | 0.0              | 19.3           | 0.0              | 9.5            | 0.0              | 38.1           | 0.0              | None                  |
| 145 | AGP exp_3   | 3685         | Alpha-1-acid glycoprotein 1,2 | NEEYNK_5_4_0_2  | 0.0                                     | 0.0              | 4.2            | 0.0              | 62.5             | 3.6               | 100.0          | 0.0              | 14.1           | 0.0              | 11.0           | 0.0              | 35.3           | 0.0              | None                  |
| 146 | AGP exp_4   | 1715         | Alpha-1-acid glycoprotein 1,2 | NEEYNK_5_4_1_1  | 0.0                                     | 0.0              | 0.0            | 0.0              | 18.8             | 17.7              | 100.0          | 0.0              | 21.1           | 0.0              | 0.0            | 0.0              | 26.1           | 0.0              | Outer                 |
| 147 | AGP exp_4   | 3137         | Alpha-1-acid glycoprotein 1,2 | NEEYNK_5_4_1_2  | 100.0                                   | 0.0              | 0.0            | 0.0              | 69.9             | 7.0               | 25.6           | 42.3             | 0.0            | 0.0              | 0.0            | 0.0              | 10.3           | 28.9             | Core                  |
| 148 | AGP exp_4   | 2595         | Alpha-1-acid glycoprotein 1,2 | NEEYNK_5_4_1_2  | 82.2                                    | 0.0              | 0.0            | 0.0              | 100.0            | 20.6              | 20.5           | 0.0              | 0.0            | 0.0              | 0.0            | 0.0              | 20.8           | 0.0              | Outer                 |
| 149 | AGP exp_3   | 2931         | Alpha-1-acid glycoprotein 1,2 | NEEYNK_5_4_1_2  | 51.9                                    | 7.1              | 4.0            | 0.0              | 100.0            | 21.9              | 57.6           | 0.0              | 0.0            | 0.0              | 3.6            | 0.0              | 18.7           | 6.2              | Outer                 |
| 150 | AGP exp_3   | 2675         | Alpha-1-acid glycoprotein 1,2 | NEEYNK_5_4_1_2  | 100.0                                   | 0.0              | 0.0            | 0.0              | 86.8             | 23.7              | 37.6           | 0.0              | 0.0            | 0.0              | 0.0            | 0.0              | 37.5           | 0.0              | Outer                 |
| 151 | AGP exp_4   | 2845         | Alpha-1-acid glycoprotein 1,2 | NEEYNK_5_4_1_2  | 33.6                                    | 4.7              | 0.0            | 0.0              | 100.0            | 29.0              | 39.8           | 0.0              | 0.0            | 0.0              | 1.9            | 0.0              | 26.7           | 0.0              | Outer                 |
| 152 | AGP exp_27  | 4342         | Alpha-1-acid glycoprotein 1,2 | NEEYNK_5_4_2_2  | 65.9                                    | 0.0              | 0.0            | 0.0              | 100.0            | 27.2              | 32.0           | 15.9             | 5.9            | 0.0              | 0.0            | 0.0              | 0.0            | 0.0              | Dual                  |
| 153 | AGP exp_18  | 4264         | Alpha-1-acid glycoprotein 1,2 | NEEYNK_5_4_2_2  | 54.8                                    | 0.0              | 0.0            | 0.0              | 100.0            | 25.4              | 19.4           | 18.0             | 0.0            | 0.0              | 0.0            | 0.0              | 7.2            | 0.0              | Dual                  |
| 154 | AGP exp_14  | 4857         | Alpha-1-acid glycoprotein 1,2 | NEEYNK_5_4_2_2  | 97.3                                    | 0.0              | 0.0            | 0.0              | 100.0            | 56.6              | 56.5           | 16.2             | 0.0            | 0.0              | 0.0            | 0.0              | 0.0            | 0.0              | Dual                  |
| 155 | AGP exp_10  | 4131         | Alpha-1-acid glycoprotein 1,2 | NEEYNK_5_4_2_2  | 64.0                                    | 0.0              | 0.0            | 0.0              | 100.0            | 30.1              | 29.7           | 22.4             | 5.4            | 0.0              | 0.0            | 0.0              | 6.3            | 22.0             | Dual                  |

Supplementary Table 2. Continued.

| No. | Experiments | CID Scan No. | N-glycoproteins               | N-glycopeptides | Relative intensities of B/Y series ions |                  |                |                  |                  |                   |                |                  |                |                  |                |                  |                |                  | Manual Classification |
|-----|-------------|--------------|-------------------------------|-----------------|-----------------------------------------|------------------|----------------|------------------|------------------|-------------------|----------------|------------------|----------------|------------------|----------------|------------------|----------------|------------------|-----------------------|
|     |             |              |                               |                 | B <sub>2</sub>                          | B <sub>2</sub> F | B <sub>3</sub> | B <sub>3</sub> F | B <sub>2</sub> S | B <sub>2</sub> SF | Y <sub>1</sub> | Y <sub>1</sub> F | Y <sub>2</sub> | Y <sub>2</sub> F | Y <sub>3</sub> | Y <sub>3</sub> F | Y <sub>4</sub> | Y <sub>4</sub> F |                       |
| 156 | AGP exp_16  | 4783         | Alpha-1-acid glycoprotein 1,2 | NEEYNK_5_4_2_2  | 61.4                                    | 0.0              | 0.0            | 0.0              | 100.0            | 26.6              | 45.3           | 11.2             | 0.0            | 0.0              | 0.0            | 0.0              | 0.0            | 0.0              | Dual                  |
| 157 | AGP exp_3   | 3997         | Alpha-1-acid glycoprotein 1,2 | NEEYNK_5_5_0_2  | 45.9                                    | 0.0              | 9.5            | 0.0              | 100.0            | 0.0               | 58.3           | 0.0              | 0.0            | 0.0              | 4.4            | 0.0              | 19.1           | 0.0              | None                  |
| 158 | AGP exp_3   | 2276         | Alpha-1-acid glycoprotein 1,2 | NEEYNK_6_5_0_1  | 100.0                                   | 0.0              | 7.8            | 0.0              | 48.1             | 0.0               | 90.8           | 0.0              | 3.7            | 0.0              | 4.3            | 0.0              | 32.8           | 0.0              | None                  |
| 159 | AGP exp_3   | 2471         | Alpha-1-acid glycoprotein 1,2 | NEEYNK_6_5_0_1  | 100.0                                   | 0.0              | 10.3           | 0.0              | 46.7             | 0.0               | 51.2           | 0.0              | 0.0            | 0.0              | 0.0            | 0.0              | 14.8           | 0.0              | None                  |
| 160 | AGP exp_4   | 2266         | Alpha-1-acid glycoprotein 1,2 | NEEYNK_6_5_0_1  | 0.0                                     | 0.0              | 16.7           | 0.0              | 30.9             | 0.0               | 100.0          | 0.0              | 14.7           | 0.0              | 9.8            | 0.0              | 12.4           | 0.0              | None                  |
| 161 | AGP exp_4   | 2383         | Alpha-1-acid glycoprotein 1,2 | NEEYNK_6_5_0_1  | 100.0                                   | 0.0              | 7.7            | 0.0              | 36.9             | 0.0               | 52.4           | 0.0              | 0.0            | 0.0              | 0.0            | 0.0              | 17.5           | 0.0              | None                  |
| 162 | AGP exp_4   | 1770         | Alpha-1-acid glycoprotein 1,2 | NEEYNK_6_5_0_1  | 100.0                                   | 0.0              | 12.5           | 0.0              | 75.0             | 0.0               | 46.4           | 0.0              | 4.5            | 0.0              | 0.0            | 0.0              | 14.6           | 0.0              | None                  |
| 163 | AGP exp_4   | 2226         | Alpha-1-acid glycoprotein 1,2 | NEEYNK_6_5_0_1  | 98.1                                    | 0.0              | 7.8            | 0.0              | 47.0             | 0.0               | 100.0          | 0.0              | 0.0            | 0.0              | 4.8            | 0.0              | 29.0           | 0.0              | None                  |
| 164 | AGP exp_3   | 2071         | Alpha-1-acid glycoprotein 1,2 | NEEYNK_6_5_0_1  | 100.0                                   | 0.0              | 7.7            | 0.0              | 44.5             | 0.0               | 57.1           | 0.0              | 0.0            | 0.0              | 5.1            | 0.0              | 26.4           | 0.0              | None                  |
| 165 | AGP exp_4   | 1845         | Alpha-1-acid glycoprotein 1,2 | NEEYNK_6_5_0_1  | 0.0                                     | 0.0              | 0.0            | 0.0              | 38.2             | 0.0               | 100.0          | 0.0              | 24.4           | 0.0              | 9.5            | 0.0              | 20.3           | 0.0              | None                  |
| 166 | AGP exp_3   | 3763         | Alpha-1-acid glycoprotein 1,2 | NEEYNK_6_5_0_2  | 70.6                                    | 0.0              | 6.2            | 0.0              | 100.0            | 0.0               | 92.0           | 0.0              | 6.6            | 0.0              | 11.0           | 0.0              | 44.8           | 0.0              | None                  |
| 167 | AGP exp_4   | 3530         | Alpha-1-acid glycoprotein 1,2 | NEEYNK_6_5_0_2  | 69.6                                    | 0.0              | 0.0            | 0.0              | 95.6             | 0.0               | 100.0          | 0.0              | 5.9            | 0.0              | 15.2           | 0.0              | 44.4           | 0.0              | None                  |
| 168 | AGP exp_4   | 3235         | Alpha-1-acid glycoprotein 1,2 | NEEYNK_6_5_0_2  | 73.3                                    | 0.0              | 5.1            | 0.0              | 88.5             | 0.0               | 100.0          | 0.0              | 6.4            | 0.0              | 11.8           | 0.0              | 41.5           | 0.0              | None                  |
| 169 | AGP exp_4   | 3849         | Alpha-1-acid glycoprotein 1,2 | NEEYNK_6_5_0_2  | 61.7                                    | 0.0              | 7.2            | 0.0              | 96.4             | 0.0               | 100.0          | 0.0              | 7.8            | 0.0              | 13.8           | 0.0              | 39.1           | 0.0              | None                  |
| 170 | AGP exp_3   | 3214         | Alpha-1-acid glycoprotein 1,2 | NEEYNK_6_5_0_2  | 0.0                                     | 0.0              | 0.0            | 0.0              | 33.2             | 0.0               | 100.0          | 0.0              | 19.3           | 0.0              | 11.9           | 0.0              | 15.8           | 0.0              | None                  |
| 171 | AGP exp_4   | 3732         | Alpha-1-acid glycoprotein 1,2 | NEEYNK_6_5_0_2  | 0.0                                     | 0.0              | 0.0            | 0.0              | 65.7             | 0.0               | 100.0          | 0.0              | 43.9           | 0.0              | 17.3           | 0.0              | 27.3           | 0.0              | None                  |
| 172 | AGP exp_3   | 4095         | Alpha-1-acid glycoprotein 1,2 | NEEYNK_6_5_0_2  | 68.4                                    | 0.0              | 5.3            | 0.0              | 100.0            | 0.0               | 95.1           | 0.0              | 8.5            | 0.0              | 9.4            | 0.0              | 45.3           | 0.0              | None                  |
| 173 | AGP exp_3   | 3129         | Alpha-1-acid glycoprotein 1,2 | NEEYNK_6_5_0_2  | 22.5                                    | 0.0              | 6.1            | 0.0              | 85.9             | 0.0               | 100.0          | 0.0              | 0.0            | 0.0              | 0.0            | 0.0              | 26.9           | 0.0              | None                  |
| 174 | AGP exp_4   | 2979         | Alpha-1-acid glycoprotein 1,2 | NEEYNK_6_5_0_2  | 65.3                                    | 0.0              | 0.0            | 0.0              | 100.0            | 0.0               | 92.6           | 0.0              | 0.0            | 0.0              | 6.1            | 0.0              | 26.8           | 0.0              | None                  |
| 175 | AGP exp_3   | 4779         | Alpha-1-acid glycoprotein 1,2 | NEEYNK_6_5_0_3  | 27.4                                    | 0.0              | 0.0            | 0.0              | 100.0            | 0.0               | 88.6           | 0.0              | 9.4            | 0.0              | 11.4           | 0.0              | 39.5           | 0.0              | None                  |
| 176 | AGP exp_4   | 4617         | Alpha-1-acid glycoprotein 1,2 | NEEYNK_6_5_0_3  | 28.8                                    | 0.0              | 4.3            | 0.0              | 100.0            | 0.0               | 88.1           | 0.0              | 7.9            | 0.0              | 11.8           | 0.0              | 43.9           | 0.0              | None                  |
| 177 | AGP exp_4   | 1713         | Alpha-1-acid glycoprotein 1,2 | NEEYNK_6_5_1_1  | 100.0                                   | 42.6             | 0.0            | 0.0              | 58.8             | 0.0               | 47.9           | 0.0              | 0.0            | 0.0              | 4.2            | 0.0              | 22.0           | 0.0              | Outer                 |
| 178 | AGP exp_4   | 2002         | Alpha-1-acid glycoprotein 1,2 | NEEYNK_6_5_1_1  | 100.0                                   | 34.2             | 0.0            | 0.0              | 48.4             | 0.0               | 81.6           | 0.0              | 0.0            | 0.0              | 5.3            | 0.0              | 22.9           | 0.0              | Outer                 |
| 179 | AGP exp_4   | 2181         | Alpha-1-acid glycoprotein 1,2 | NEEYNK_6_5_1_1  | 77.7                                    | 15.8             | 0.0            | 0.0              | 41.8             | 28.0              | 100.0          | 0.0              | 0.0            | 0.0              | 6.1            | 0.0              | 27.0           | 2.5              | Outer                 |
| 180 | AGP exp_3   | 2008         | Alpha-1-acid glycoprotein 1,2 | NEEYNK_6_5_1_1  | 100.0                                   | 20.3             | 0.0            | 0.0              | 56.3             | 0.0               | 44.5           | 0.0              | 6.7            | 0.0              | 0.0            | 0.0              | 11.5           | 0.0              | Outer                 |
| 181 | AGP exp_3   | 2237         | Alpha-1-acid glycoprotein 1,2 | NEEYNK_6_5_1_1  | 88.0                                    | 16.4             | 5.8            | 0.0              | 33.3             | 24.1              | 100.0          | 0.0              | 0.0            | 0.0              | 0.0            | 0.0              | 32.0           | 0.0              | Outer                 |

Supplementary Table 2. Continued.

| No. | Experiments | CID Scan No. | N-glycoproteins               | N-glycopeptides | Relative intensities of B/Y series ions |                  |                |                  |                  |                   |                |                  |                |                  |                |                  |                |                  | Manual Classification |
|-----|-------------|--------------|-------------------------------|-----------------|-----------------------------------------|------------------|----------------|------------------|------------------|-------------------|----------------|------------------|----------------|------------------|----------------|------------------|----------------|------------------|-----------------------|
|     |             |              |                               |                 | B <sub>2</sub>                          | B <sub>2</sub> F | B <sub>3</sub> | B <sub>3</sub> F | B <sub>2</sub> S | B <sub>2</sub> SF | Y <sub>1</sub> | Y <sub>1</sub> F | Y <sub>2</sub> | Y <sub>2</sub> F | Y <sub>3</sub> | Y <sub>3</sub> F | Y <sub>4</sub> | Y <sub>4</sub> F |                       |
| 182 | AGP exp_3   | 3683         | Alpha-1-acid glycoprotein 1,2 | NEEYNK_6_5_1_2  | 51.9                                    | 9.5              | 2.8            | 0.0              | 100.0            | 27.0              | 69.2           | 6.1              | 0.0            | 0.0              | 4.5            | 0.0              | 27.6           | 6.9              | Outer                 |
| 183 | AGP exp_3   | 3041         | Alpha-1-acid glycoprotein 1,2 | NEEYNK_6_5_1_2  | 49.3                                    | 17.0             | 5.1            | 0.0              | 78.6             | 18.7              | 100.0          | 0.0              | 0.0            | 0.0              | 13.4           | 0.0              | 39.3           | 1.8              | Outer                 |
| 184 | AGP exp_4   | 3217         | Alpha-1-acid glycoprotein 1,2 | NEEYNK_6_5_1_2  | 70.1                                    | 19.5             | 0.0            | 0.0              | 100.0            | 35.6              | 70.7           | 0.0              | 12.9           | 0.0              | 0.0            | 0.0              | 40.5           | 0.0              | Outer                 |
| 185 | AGP exp_4   | 2939         | Alpha-1-acid glycoprotein 1,2 | NEEYNK_6_5_1_2  | 24.2                                    | 15.4             | 5.5            | 0.0              | 72.1             | 20.5              | 100.0          | 0.0              | 0.0            | 0.0              | 12.8           | 0.0              | 38.5           | 0.0              | Outer                 |
| 186 | AGP exp_3   | 3362         | Alpha-1-acid glycoprotein 1,2 | NEEYNK_6_5_1_2  | 56.9                                    | 16.9             | 0.0            | 0.0              | 76.0             | 32.8              | 100.0          | 0.0              | 0.0            | 0.0              | 3.8            | 0.0              | 47.2           | 0.0              | Outer                 |
| 187 | AGP exp_4   | 2632         | Alpha-1-acid glycoprotein 1,2 | NEEYNK_6_5_1_2  | 46.9                                    | 0.0              | 0.0            | 0.0              | 100.0            | 33.9              | 81.9           | 0.0              | 0.0            | 0.0              | 0.0            | 0.0              | 16.1           | 0.0              | Outer                 |
| 188 | AGP exp_4   | 3797         | Alpha-1-acid glycoprotein 1,2 | NEEYNK_6_5_1_2  | 84.0                                    | 5.6              | 0.0            | 0.0              | 100.0            | 30.2              | 99.4           | 7.5              | 0.0            | 0.0              | 5.0            | 0.0              | 34.9           | 4.0              | Outer                 |
| 189 | AGP exp_3   | 3991         | Alpha-1-acid glycoprotein 1,2 | NEEYNK_6_5_1_2  | 65.1                                    | 13.9             | 0.0            | 0.0              | 100.0            | 34.2              | 86.7           | 7.2              | 0.0            | 0.0              | 0.0            | 0.0              | 46.6           | 4.3              | Outer                 |
| 190 | AGP exp_4   | 3217         | Alpha-1-acid glycoprotein 1,2 | NEEYNK_6_5_1_2  | 70.1                                    | 19.5             | 0.0            | 0.0              | 100.0            | 35.6              | 70.7           | 0.0              | 12.9           | 0.0              | 0.0            | 0.0              | 40.5           | 0.0              | Outer                 |
| 191 | AGP exp_3   | 4752         | Alpha-1-acid glycoprotein 1,2 | NEEYNK_6_5_1_3  | 17.8                                    | 5.3              | 3.6            | 0.0              | 89.3             | 32.8              | 100.0          | 0.0              | 0.0            | 0.0              | 12.7           | 0.0              | 47.4           | 0.0              | Outer                 |
| 192 | AGP exp_4   | 4522         | Alpha-1-acid glycoprotein 1,2 | NEEYNK_6_5_1_3  | 18.0                                    | 6.1              | 0.0            | 0.0              | 90.3             | 31.1              | 100.0          | 0.0              | 0.0            | 0.0              | 12.7           | 0.0              | 41.2           | 0.0              | Outer                 |
| 193 | AGP exp_32  | 3737         | Alpha-1-acid glycoprotein 1,2 | NEEYNK_6_5_2_2  | 54.8                                    | 28.1             | 7.4            | 0.0              | 100.0            | 22.3              | 49.0           | 17.0             | 0.0            | 0.0              | 4.9            | 0.0              | 17.3           | 10.7             | Dual                  |
| 194 | AGP exp_27  | 3977         | Alpha-1-acid glycoprotein 1,2 | NEEYNK_6_5_2_2  | 35.8                                    | 17.5             | 5.9            | 0.0              | 100.0            | 12.5              | 22.8           | 12.2             | 0.0            | 0.0              | 3.5            | 0.0              | 7.4            | 15.4             | Dual                  |
| 195 | AGP exp_35  | 4713         | Alpha-1-acid glycoprotein 1,2 | NEEYNK_6_5_2_2  | 65.2                                    | 16.0             | 0.0            | 0.0              | 100.0            | 30.1              | 57.8           | 21.0             | 4.8            | 0.0              | 4.5            | 0.0              | 12.6           | 14.8             | Dual                  |
| 196 | AGP exp_33  | 3653         | Alpha-1-acid glycoprotein 1,2 | NEEYNK_6_5_2_2  | 49.8                                    | 15.4             | 0.0            | 0.0              | 100.0            | 20.0              | 40.7           | 15.1             | 5.2            | 0.0              | 0.0            | 0.0              | 11.0           | 0.0              | Dual                  |
| 197 | AGP exp_39  | 4604         | Alpha-1-acid glycoprotein 1,2 | NEEYNK_6_5_2_2  | 55.3                                    | 17.6             | 0.0            | 0.0              | 76.7             | 51.0              | 100.0          | 4.8              | 5.6            | 0.0              | 0.0            | 0.0              | 28.9           | 8.1              | Dual                  |
| 198 | AGP exp_10  | 3850         | Alpha-1-acid glycoprotein 1,2 | NEEYNK_6_5_2_2  | 57.2                                    | 17.7             | 0.0            | 0.0              | 100.0            | 0.0               | 18.4           | 8.6              | 0.0            | 0.0              | 0.0            | 0.0              | 0.0            | 0.0              | Dual                  |
| 199 | AGP exp_33  | 4027         | Alpha-1-acid glycoprotein 1,2 | NEEYNK_6_5_2_2  | 69.8                                    | 14.4             | 13.0           | 0.0              | 100.0            | 19.6              | 36.4           | 32.9             | 0.0            | 0.0              | 0.0            | 0.0              | 0.0            | 0.0              | Dual                  |
| 200 | AGP exp_43  | 4537         | Alpha-1-acid glycoprotein 1,2 | NEEYNK_6_5_2_2  | 71.0                                    | 13.5             | 0.0            | 0.0              | 100.0            | 26.9              | 63.8           | 23.5             | 0.0            | 0.0              | 0.0            | 0.0              | 18.4           | 4.7              | Dual                  |
| 201 | AGP exp_10  | 4070         | Alpha-1-acid glycoprotein 1,2 | NEEYNK_6_5_2_2  | 68.6                                    | 14.1             | 0.0            | 0.0              | 100.0            | 18.4              | 10.9           | 41.6             | 0.0            | 0.0              | 0.0            | 0.0              | 0.0            | 0.0              | Dual                  |
| 202 | AGP exp_3   | 2752         | Alpha-1-acid glycoprotein 1,2 | NEEYNK_6_5_2_2  | 67.4                                    | 81.5             | 0.0            | 0.0              | 100.0            | 0.0               | 97.6           | 0.0              | 0.0            | 0.0              | 0.0            | 0.0              | 27.5           | 0.0              | Outer                 |
| 203 | AGP exp_37  | 4770         | Alpha-1-acid glycoprotein 1,2 | NEEYNK_6_5_2_2  | 53.9                                    | 15.0             | 0.0            | 0.0              | 100.0            | 15.7              | 42.3           | 35.3             | 0.0            | 0.0              | 0.0            | 0.0              | 11.2           | 20.2             | Dual                  |
| 204 | AGP exp_42  | 4787         | Alpha-1-acid glycoprotein 1,2 | NEEYNK_6_5_2_2  | 74.8                                    | 20.1             | 0.0            | 0.0              | 100.0            | 60.7              | 99.8           | 14.7             | 0.0            | 0.0              | 0.0            | 0.0              | 27.4           | 11.4             | Dual                  |
| 205 | AGP exp_38  | 4696         | Alpha-1-acid glycoprotein 1,2 | NEEYNK_6_5_2_2  | 67.3                                    | 10.4             | 0.0            | 0.0              | 100.0            | 14.0              | 49.9           | 20.3             | 0.0            | 0.0              | 0.0            | 0.0              | 9.2            | 8.6              | Dual                  |
| 206 | AGP exp_28  | 4926         | Alpha-1-acid glycoprotein 1,2 | NEEYNK_6_5_2_2  | 29.0                                    | 9.8              | 0.0            | 0.0              | 100.0            | 21.4              | 43.0           | 20.7             | 0.0            | 0.0              | 0.0            | 0.0              | 3.7            | 0.0              | Dual                  |
| 207 | AGP exp_16  | 5415         | Alpha-1-acid glycoprotein 1,2 | NEEYNK_6_5_2_2  | 61.3                                    | 0.0              | 0.0            | 0.0              | 100.0            | 32.4              | 42.1           | 23.6             | 0.0            | 0.0              | 0.0            | 0.0              | 0.0            | 0.0              | Dual                  |

Supplementary Table 2. Continued.

| No. | Experiments | CID Scan No. | N-glycoproteins               | N-glycopeptides           | Relative intensities of B/Y series ions |                  |                |                  |                  |                   |                |                  |                |                  |                |                  |                |                  | Manual Classification |
|-----|-------------|--------------|-------------------------------|---------------------------|-----------------------------------------|------------------|----------------|------------------|------------------|-------------------|----------------|------------------|----------------|------------------|----------------|------------------|----------------|------------------|-----------------------|
|     |             |              |                               |                           | B <sub>2</sub>                          | B <sub>2</sub> F | B <sub>3</sub> | B <sub>3</sub> F | B <sub>2</sub> S | B <sub>2</sub> SF | Y <sub>1</sub> | Y <sub>1</sub> F | Y <sub>2</sub> | Y <sub>2</sub> F | Y <sub>3</sub> | Y <sub>3</sub> F | Y <sub>4</sub> | Y <sub>4</sub> F |                       |
| 208 | AGP exp_40  | 4658         | Alpha-1-acid glycoprotein 1,2 | NEEYNK_6_5_2_2            | 80.8                                    | 10.8             | 11.9           | 0.0              | 100.0            | 30.4              | 90.4           | 36.0             | 0.0            | 0.0              | 4.9            | 4.3              | 8.1            | 11.1             | Dual                  |
| 209 | AGP exp_13  | 5550         | Alpha-1-acid glycoprotein 1,2 | NEEYNK_6_5_2_2            | 41.3                                    | 0.0              | 0.0            | 0.0              | 100.0            | 28.2              | 35.8           | 13.9             | 0.0            | 0.0              | 0.0            | 0.0              | 0.0            | 0.0              | Dual                  |
| 210 | AGP exp_26  | 5048         | Alpha-1-acid glycoprotein 1,2 | NEEYNK_6_5_2_2            | 58.3                                    | 9.8              | 11.9           | 0.0              | 100.0            | 31.9              | 36.8           | 29.7             | 0.0            | 0.0              | 0.0            | 0.0              | 10.8           | 0.0              | Dual                  |
| 211 | AGP exp_40  | 4328         | Alpha-1-acid glycoprotein 1,2 | NEEYNK_6_5_2_2            | 68.6                                    | 14.9             | 0.0            | 0.0              | 100.0            | 23.6              | 45.8           | 8.4              | 0.0            | 0.0              | 0.0            | 0.0              | 0.0            | 0.0              | Dual                  |
| 212 | AGP exp_43  | 4877         | Alpha-1-acid glycoprotein 1,2 | NEEYNK_6_5_2_2            | 60.2                                    | 10.7             | 7.1            | 0.0              | 100.0            | 15.8              | 52.9           | 9.9              | 0.0            | 0.0              | 0.0            | 0.0              | 19.8           | 10.3             | Dual                  |
| 213 | AGP exp_16  | 9686         | Alpha-1-acid glycoprotein 1,2 | NEEYNK_6_5_2_3            | 0.0                                     | 10.5             | 6.0            | 0.0              | 100.0            | 65.4              | 99.0           | 0.0              | 0.0            | 0.0              | 12.5           | 0.0              | 40.2           | 11.5             | Dual                  |
| 214 | AGP exp_10  | 7457         | Alpha-1-acid glycoprotein 1,2 | NEEYNK_6_5_2_3            | 0.0                                     | 10.1             | 0.0            | 0.0              | 100.0            | 47.8              | 69.8           | 15.2             | 0.0            | 0.0              | 8.5            | 0.0              | 28.9           | 15.3             | Dual                  |
| 215 | AGP exp_15  | 9515         | Alpha-1-acid glycoprotein 1,2 | NEEYNK_6_5_2_3            | 0.0                                     | 10.6             | 4.1            | 0.0              | 95.4             | 55.7              | 100.0          | 0.0              | 8.0            | 0.0              | 8.4            | 0.0              | 38.7           | 9.8              | Dual                  |
| 216 | AGP exp_43  | 8738         | Alpha-1-acid glycoprotein 1,2 | NEEYNK_6_5_2_3            | 0.0                                     | 7.6              | 0.0            | 0.0              | 100.0            | 45.0              | 85.5           | 14.3             | 0.0            | 0.0              | 8.8            | 0.0              | 37.5           | 17.1             | Dual                  |
| 217 | AGP exp_39  | 8633         | Alpha-1-acid glycoprotein 1,2 | NEEYNK_6_5_2_3            | 3.5                                     | 9.2              | 4.8            | 0.0              | 100.0            | 46.3              | 75.0           | 10.6             | 0.0            | 0.0              | 8.5            | 3.3              | 33.2           | 14.0             | Dual                  |
| 218 | AGP exp_30  | 3882         | Alpha-1-acid glycoprotein 1,2 | NEEYNK_6_5_2_3            | 0.0                                     | 5.5              | 0.0            | 0.0              | 100.0            | 27.1              | 22.9           | 35.5             | 0.0            | 0.0              | 0.0            | 0.0              | 11.7           | 24.6             | Dual                  |
| 219 | AGP exp_27  | 8385         | Alpha-1-acid glycoprotein 1,2 | NEEYNK_6_5_2_3            | 0.0                                     | 9.9              | 0.0            | 0.0              | 100.0            | 49.8              | 78.4           | 16.9             | 0.0            | 0.0              | 10.3           | 0.0              | 31.2           | 23.2             | Dual                  |
| 220 | AGP exp_22  | 8445         | Alpha-1-acid glycoprotein 1,2 | NEEYNK_6_5_2_3            | 0.0                                     | 8.2              | 0.0            | 0.0              | 100.0            | 41.4              | 78.7           | 0.0              | 0.0            | 0.0              | 0.0            | 0.0              | 21.9           | 9.5              | Dual                  |
| 221 | AGP exp_35  | 8687         | Alpha-1-acid glycoprotein 1,2 | NEEYNK_6_5_2_3            | 0.0                                     | 9.2              | 4.8            | 0.0              | 100.0            | 46.0              | 66.7           | 21.6             | 0.0            | 0.0              | 5.1            | 0.0              | 25.2           | 14.7             | Dual                  |
| 222 | AGP exp_18  | 8217         | Alpha-1-acid glycoprotein 1,2 | NEEYNK_6_5_2_3            | 0.0                                     | 8.4              | 0.0            | 0.0              | 100.0            | 52.3              | 86.6           | 7.8              | 0.0            | 0.0              | 9.6            | 0.0              | 40.2           | 14.2             | Dual                  |
| 223 | AGP exp_24  | 8858         | Alpha-1-acid glycoprotein 1,2 | NEEYNK_6_5_2_3            | 0.0                                     | 10.9             | 0.0            | 0.0              | 100.0            | 44.2              | 83.9           | 14.0             | 0.0            | 0.0              | 6.5            | 0.0              | 33.7           | 13.4             | Dual                  |
| 224 | AGP exp_29  | 3918         | Alpha-1-acid glycoprotein 1,2 | NEEYNK_6_5_2_3            | 0.0                                     | 3.0              | 0.0            | 0.0              | 100.0            | 20.5              | 45.4           | 21.0             | 7.0            | 0.0              | 2.6            | 0.0              | 14.1           | 12.8             | Dual                  |
| 225 | AGP exp_4   | 4619         | Alpha-1-acid glycoprotein 1,2 | NEEYNK_6_5_2_3            | 0.0                                     | 5.6              | 6.4            | 0.0              | 100.0            | 35.4              | 33.6           | 21.8             | 0.0            | 0.0              | 0.0            | 0.0              | 22.9           | 15.6             | Dual                  |
| 226 | AGP exp_13  | 10122        | Alpha-1-acid glycoprotein 1,2 | NEEYNK_6_5_2_3            | 0.0                                     | 3.5              | 1.9            | 0.0              | 100.0            | 24.6              | 41.1           | 16.0             | 0.0            | 0.0              | 4.1            | 1.8              | 12.7           | 16.2             | Dual                  |
| 227 | AGP exp_6   | 5905         | Alpha-1-acid glycoprotein 1,2 | NEEYNK_6_5_2_3            | 0.0                                     | 4.5              | 0.0            | 0.0              | 100.0            | 33.1              | 83.4           | 2.7              | 0.0            | 0.0              | 0.0            | 0.0              | 28.4           | 8.4              | Dual                  |
| 228 | AGP exp_3   | 4679         | Alpha-1-acid glycoprotein 1,2 | NEEYNK_6_5_3_1            | 56.7                                    | 10.2             | 0.0            | 0.0              | 100.0            | 22.5              | 59.0           | 0.0              | 6.9            | 0.0              | 8.8            | 0.0              | 25.5           | 0.0              | Outer                 |
| 229 | AGP exp_3   | 5953         | Alpha-1-acid glycoprotein 1,2 | NEEYNK_6_5_3_2            | 20.0                                    | 7.4              | 5.0            | 0.0              | 100.0            | 23.3              | 0.0            | 0.0              | 0.0            | 0.0              | 0.0            | 0.0              | 0.0            | 0.0              | Outer                 |
| 230 | AGP exp_4   | 26479        | Alpha-1-acid glycoprotein 1,2 | SVQEIQATFFYFTPKNK_6_5_0_3 | 21.2                                    | 0.0              | 6.6            | 0.0              | 100.0            | 0.0               | 57.3           | 0.0              | 2.7            | 0.0              | 12.9           | 0.0              | 27.7           | 0.0              | None                  |
| 231 | AGP exp_4   | 26406        | Alpha-1-acid glycoprotein 1,2 | SVQEIQATFFYFTPKNK_7_6_0_3 | 9.2                                     | 0.0              | 0.0            | 0.0              | 100.0            | 0.0               | 16.3           | 0.0              | 1.5            | 0.0              | 0.0            | 0.0              | 4.1            | 0.0              | None                  |
| 232 | AGP exp_4   | 1622         | Alpha-1-acid glycoprotein 2   | ENGTVSR_6_5_0_1           | 100.0                                   | 0.0              | 7.4            | 0.0              | 40.4             | 0.0               | 55.8           | 0.0              | 0.0            | 0.0              | 0.0            | 0.0              | 18.6           | 0.0              | None                  |
| 233 | AGP exp_4   | 2301         | Alpha-1-acid glycoprotein 2   | ENGTVSR_6_5_0_2           | 100.0                                   | 0.0              | 0.0            | 0.0              | 71.9             | 0.0               | 98.7           | 0.0              | 0.0            | 0.0              | 11.6           | 0.0              | 45.2           | 0.0              | None                  |

Supplementary Table 2. Continued.

| No. | Experiments | CID Scan No. | N-glycoproteins             | N-glycopeptides | Relative intensities of B/Y series ions |                  |                |                  |                  |                   |                |                  |                |                  |                |                  |                |                  | Manual Classification |
|-----|-------------|--------------|-----------------------------|-----------------|-----------------------------------------|------------------|----------------|------------------|------------------|-------------------|----------------|------------------|----------------|------------------|----------------|------------------|----------------|------------------|-----------------------|
|     |             |              |                             |                 | B <sub>2</sub>                          | B <sub>2</sub> F | B <sub>3</sub> | B <sub>3</sub> F | B <sub>2</sub> S | B <sub>2</sub> SF | Y <sub>1</sub> | Y <sub>1</sub> F | Y <sub>2</sub> | Y <sub>2</sub> F | Y <sub>3</sub> | Y <sub>3</sub> F | Y <sub>4</sub> | Y <sub>4</sub> F |                       |
| 234 | AGP exp_3   | 2540         | Alpha-1-acid glycoprotein 2 | ENGTVSR_6_5_0_2 | 42.1                                    | 0.0              | 0.0            | 0.0              | 100.0            | 0.0               | 50.7           | 0.0              | 0.0            | 0.0              | 4.2            | 0.0              | 26.7           | 0.0              | None                  |
| 235 | AGP exp_4   | 2449         | Alpha-1-acid glycoprotein 2 | ENGTVSR_6_5_0_2 | 87.1                                    | 0.0              | 0.0            | 0.0              | 100.0            | 0.0               | 57.7           | 0.0              | 6.5            | 0.0              | 3.6            | 0.0              | 22.2           | 0.0              | None                  |
| 236 | AGP exp_3   | 2385         | Alpha-1-acid glycoprotein 2 | ENGTVSR_6_5_0_2 | 86.2                                    | 0.0              | 0.0            | 0.0              | 100.0            | 0.0               | 45.2           | 0.0              | 4.6            | 0.0              | 7.8            | 0.0              | 33.6           | 0.0              | None                  |
| 237 | AGP exp_4   | 2552         | Alpha-1-acid glycoprotein 2 | ENGTVSR_6_5_0_2 | 49.0                                    | 0.0              | 0.0            | 0.0              | 72.2             | 0.0               | 100.0          | 0.0              | 2.3            | 0.0              | 1.9            | 0.0              | 21.5           | 0.0              | None                  |
| 238 | AGP exp_3   | 2645         | Alpha-1-acid glycoprotein 2 | ENGTVSR_6_5_0_2 | 78.8                                    | 0.0              | 5.5            | 0.0              | 95.0             | 0.0               | 100.0          | 0.0              | 2.6            | 0.0              | 4.8            | 0.0              | 30.9           | 0.0              | None                  |
| 239 | AGP exp_4   | 4068         | Alpha-1-acid glycoprotein 2 | ENGTVSR_6_5_0_3 | 36.1                                    | 0.0              | 0.0            | 0.0              | 82.4             | 0.0               | 100.0          | 0.0              | 5.3            | 0.0              | 15.5           | 0.0              | 64.2           | 0.0              | None                  |
| 240 | AGP exp_3   | 4183         | Alpha-1-acid glycoprotein 2 | ENGTVSR_6_5_0_3 | 25.8                                    | 0.0              | 0.0            | 0.0              | 100.0            | 0.0               | 81.5           | 0.0              | 4.4            | 0.0              | 10.0           | 0.0              | 42.3           | 0.0              | None                  |
| 241 | AGP exp_3   | 1431         | Alpha-1-acid glycoprotein 2 | ENGTVSR_6_5_1_1 | 100.0                                   | 46.2             | 0.0            | 0.0              | 24.3             | 0.0               | 40.3           | 0.0              | 0.0            | 0.0              | 0.0            | 0.0              | 28.5           | 0.0              | Outer                 |
| 242 | AGP exp_4   | 1462         | Alpha-1-acid glycoprotein 2 | ENGTVSR_6_5_1_1 | 100.0                                   | 38.5             | 0.0            | 0.0              | 38.8             | 0.0               | 48.8           | 0.0              | 0.0            | 0.0              | 0.0            | 0.0              | 18.9           | 0.0              | Outer                 |
| 243 | AGP exp_4   | 1575         | Alpha-1-acid glycoprotein 2 | ENGTVSR_6_5_1_1 | 100.0                                   | 28.2             | 0.0            | 0.0              | 44.2             | 0.0               | 74.4           | 0.0              | 0.0            | 0.0              | 8.8            | 0.0              | 37.7           | 0.0              | Outer                 |
| 244 | AGP exp_3   | 2599         | Alpha-1-acid glycoprotein 2 | ENGTVSR_6_5_1_2 | 86.3                                    | 12.6             | 0.0            | 0.0              | 96.9             | 37.3              | 100.0          | 0.0              | 0.0            | 0.0              | 0.0            | 0.0              | 35.7           | 0.0              | Outer                 |
| 245 | AGP exp_4   | 2306         | Alpha-1-acid glycoprotein 2 | ENGTVSR_6_5_1_2 | 61.2                                    | 20.7             | 5.4            | 0.0              | 100.0            | 31.2              | 93.6           | 0.0              | 0.0            | 0.0              | 0.0            | 0.0              | 30.3           | 2.2              | Outer                 |
| 246 | AGP exp_4   | 3953         | Alpha-1-acid glycoprotein 2 | ENGTVSR_6_5_1_3 | 19.9                                    | 5.1              | 3.9            | 0.0              | 96.9             | 30.6              | 100.0          | 0.0              | 4.1            | 0.0              | 0.0            | 0.0              | 49.2           | 0.0              | Outer                 |
| 247 | AGP exp_3   | 4068         | Alpha-1-acid glycoprotein 2 | ENGTVSR_6_5_1_3 | 20.7                                    | 5.6              | 0.0            | 0.0              | 94.3             | 33.9              | 100.0          | 0.0              | 7.0            | 0.0              | 0.0            | 0.0              | 46.0           | 0.0              | Outer                 |
| 248 | AGP exp_23  | 6765         | Alpha-1-acid glycoprotein 2 | ENGTVSR_6_5_2_3 | 11.7                                    | 10.8             | 0.0            | 0.0              | 100.0            | 59.9              | 55.2           | 0.0              | 0.0            | 0.0              | 0.0            | 0.0              | 45.6           | 9.1              | Dual                  |
| 249 | AGP exp_9   | 5961         | Alpha-1-acid glycoprotein 2 | ENGTVSR_6_5_2_3 | 8.5                                     | 0.0              | 0.0            | 0.0              | 100.0            | 68.4              | 90.6           | 0.0              | 0.0            | 0.0              | 0.0            | 0.0              | 44.8           | 11.9             | Dual                  |
| 250 | AGP exp_40  | 7029         | Alpha-1-acid glycoprotein 2 | ENGTVSR_6_5_2_3 | 12.1                                    | 14.7             | 0.0            | 0.0              | 100.0            | 53.3              | 52.9           | 0.0              | 0.0            | 0.0              | 0.0            | 0.0              | 37.6           | 10.1             | Dual                  |
| 251 | AGP exp_41  | 7205         | Alpha-1-acid glycoprotein 2 | ENGTVSR_6_5_2_3 | 8.3                                     | 0.0              | 0.0            | 0.0              | 100.0            | 57.8              | 59.3           | 0.0              | 0.0            | 0.0              | 6.8            | 0.0              | 35.0           | 14.1             | Dual                  |
| 252 | AGP exp_38  | 7085         | Alpha-1-acid glycoprotein 2 | ENGTVSR_6_5_2_3 | 8.0                                     | 12.9             | 0.0            | 0.0              | 100.0            | 66.4              | 74.6           | 0.0              | 0.0            | 0.0              | 0.0            | 0.0              | 26.0           | 8.3              | Dual                  |
| 253 | AGP exp_34  | 5844         | Alpha-1-acid glycoprotein 2 | ENGTVSR_6_5_2_3 | 10.6                                    | 0.0              | 0.0            | 0.0              | 100.0            | 75.3              | 92.3           | 0.0              | 4.7            | 0.0              | 0.0            | 0.0              | 40.5           | 14.1             | Dual                  |
| 254 | AGP exp_42  | 7163         | Alpha-1-acid glycoprotein 2 | ENGTVSR_6_5_2_3 | 8.0                                     | 6.2              | 0.0            | 0.0              | 100.0            | 57.5              | 43.0           | 0.0              | 0.0            | 0.0              | 3.0            | 0.0              | 29.7           | 10.9             | Dual                  |
| 255 | AGP exp_32  | 6001         | Alpha-1-acid glycoprotein 2 | ENGTVSR_6_5_2_3 | 6.6                                     | 6.0              | 0.0            | 0.0              | 100.0            | 72.8              | 67.2           | 0.0              | 2.9            | 0.0              | 0.0            | 0.0              | 39.2           | 9.3              | Dual                  |
| 256 | AGP exp_4   | 1946         | Alpha-1-acid glycoprotein 2 | ENGTVSR_7_6_1_2 | 31.0                                    | 15.5             | 0.0            | 0.0              | 100.0            | 21.3              | 74.1           | 0.0              | 0.0            | 0.0              | 0.0            | 0.0              | 0.0            | 0.0              | Outer                 |
| 257 | AGP exp_3   | 2390         | Alpha-1-acid glycoprotein 2 | ENGTVSR_7_6_1_2 | 22.0                                    | 9.8              | 0.0            | 0.0              | 100.0            | 24.9              | 82.9           | 0.0              | 0.0            | 0.0              | 0.0            | 0.0              | 0.0            | 0.0              | Outer                 |
| 258 | AGP exp_3   | 2203         | Alpha-1-acid glycoprotein 2 | ENGTVSR_7_6_1_2 | 12.3                                    | 19.2             | 0.0            | 0.0              | 100.0            | 24.2              | 58.9           | 0.0              | 0.0            | 0.0              | 0.0            | 0.0              | 0.0            | 0.0              | Outer                 |
| 259 | AGP exp_3   | 1953         | Alpha-1-acid glycoprotein 2 | ENGTVSR_7_6_1_2 | 38.4                                    | 12.3             | 0.0            | 0.0              | 100.0            | 11.0              | 75.7           | 0.0              | 0.0            | 0.0              | 0.0            | 0.0              | 0.0            | 0.0              | Outer                 |

Supplementary Table 2. Continued.

| No. | Experiments | CID Scan No. | N-glycoproteins             | N-glycopeptides       | Relative intensities of B/Y series ions |                  |                |                  |                  |                   |                |                  |                |                  |                |                  |                | Manual Classification |                  |
|-----|-------------|--------------|-----------------------------|-----------------------|-----------------------------------------|------------------|----------------|------------------|------------------|-------------------|----------------|------------------|----------------|------------------|----------------|------------------|----------------|-----------------------|------------------|
|     |             |              |                             |                       | B <sub>2</sub>                          | B <sub>2</sub> F | B <sub>3</sub> | B <sub>3</sub> F | B <sub>2</sub> S | B <sub>2</sub> SF | Y <sub>1</sub> | Y <sub>1</sub> F | Y <sub>2</sub> | Y <sub>2</sub> F | Y <sub>3</sub> | Y <sub>3</sub> F | Y <sub>4</sub> |                       | Y <sub>4</sub> F |
| 260 | AGP exp_4   | 2136         | Alpha-1-acid glycoprotein 2 | ENGTVSR_7_6_1_2       | 26.8                                    | 20.4             | 0.0            | 0.0              | 100.0            | 18.7              | 58.5           | 0.0              | 0.0            | 0.0              | 0.0            | 0.0              | 0.0            | 0.0                   | Outer            |
| 261 | AGP exp_4   | 2157         | Alpha-1-acid glycoprotein 2 | ENGTVSR_7_6_1_2       | 37.4                                    | 23.3             | 0.0            | 0.0              | 100.0            | 21.2              | 59.5           | 0.0              | 0.0            | 0.0              | 0.0            | 0.0              | 0.0            | 0.0                   | Outer            |
| 262 | AGP exp_3   | 5210         | Alpha-1-acid glycoprotein 2 | ENGTVSR_7_6_1_4       | 41.3                                    | 2.7              | 0.0            | 0.0              | 100.0            | 22.7              | 16.9           | 0.0              | 0.0            | 0.0              | 0.0            | 0.0              | 3.7            | 0.0                   | Outer            |
| 263 | AGP exp_4   | 5084         | Alpha-1-acid glycoprotein 2 | ENGTVSR_7_6_1_4       | 29.3                                    | 0.0              | 0.0            | 0.0              | 100.0            | 22.3              | 11.2           | 0.0              | 0.0            | 0.0              | 0.0            | 0.0              | 3.3            | 0.0                   | Outer            |
| 264 | AGP exp_4   | 15084        | Alpha-1-acid glycoprotein 2 | LVPVPITNATLDR_3_3_0_0 | 4.6                                     | 0.0              | 4.9            | 0.0              | 0.0              | 0.0               | 100.0          | 0.0              | 7.9            | 0.0              | 32.7           | 0.0              | 35.8           | 0.0                   | None             |
| 265 | AGP exp_3   | 12281        | Alpha-1-acid glycoprotein 2 | LVPVPITNATLDR_3_3_0_0 | 9.3                                     | 0.0              | 2.8            | 0.0              | 0.0              | 0.0               | 100.0          | 0.0              | 4.5            | 0.0              | 35.8           | 0.0              | 33.9           | 0.0                   | None             |
| 266 | AGP exp_3   | 12722        | Alpha-1-acid glycoprotein 2 | LVPVPITNATLDR_4_4_0_1 | 32.2                                    | 0.0              | 0.0            | 0.0              | 24.0             | 0.0               | 9.3            | 0.0              | 15.8           | 0.0              | 100.0          | 0.0              | 5.0            | 0.0                   | None             |
| 267 | AGP exp_3   | 12725        | Alpha-1-acid glycoprotein 2 | LVPVPITNATLDR_4_4_0_1 | 29.1                                    | 0.0              | 0.0            | 0.0              | 35.7             | 0.0               | 11.0           | 0.0              | 21.9           | 0.0              | 100.0          | 0.0              | 0.0            | 0.0                   | None             |
| 268 | AGP exp_3   | 15340        | Alpha-1-acid glycoprotein 2 | LVPVPITNATLDR_5_4_0_1 | 0.0                                     | 0.0              | 3.7            | 0.0              | 4.9              | 0.0               | 100.0          | 0.0              | 6.7            | 0.0              | 7.2            | 0.0              | 5.3            | 0.0                   | None             |
| 269 | AGP exp_3   | 12615        | Alpha-1-acid glycoprotein 2 | LVPVPITNATLDR_5_4_0_1 | 44.4                                    | 0.0              | 0.0            | 0.0              | 81.1             | 0.0               | 40.9           | 0.0              | 0.0            | 0.0              | 14.2           | 0.0              | 100.0          | 0.0                   | None             |
| 270 | AGP exp_4   | 14992        | Alpha-1-acid glycoprotein 2 | LVPVPITNATLDR_5_4_0_1 | 0.0                                     | 0.0              | 0.0            | 0.0              | 7.8              | 0.0               | 100.0          | 0.0              | 2.7            | 0.0              | 2.4            | 0.0              | 9.0            | 0.0                   | None             |
| 271 | AGP exp_3   | 12307        | Alpha-1-acid glycoprotein 2 | LVPVPITNATLDR_5_4_0_1 | 100.0                                   | 0.0              | 14.0           | 0.0              | 59.5             | 0.0               | 30.3           | 0.0              | 0.0            | 0.0              | 11.1           | 0.0              | 76.9           | 0.0                   | None             |
| 272 | AGP exp_4   | 15488        | Alpha-1-acid glycoprotein 2 | LVPVPITNATLDR_5_4_0_2 | 0.0                                     | 0.0              | 0.0            | 0.0              | 12.5             | 0.0               | 100.0          | 0.0              | 8.8            | 0.0              | 9.9            | 0.0              | 11.1           | 0.0                   | None             |
| 273 | AGP exp_3   | 16069        | Alpha-1-acid glycoprotein 2 | LVPVPITNATLDR_5_4_0_2 | 32.8                                    | 0.0              | 0.0            | 0.0              | 100.0            | 0.0               | 47.8           | 0.0              | 0.0            | 0.0              | 6.5            | 0.0              | 45.1           | 0.0                   | None             |
| 274 | AGP exp_3   | 15799        | Alpha-1-acid glycoprotein 2 | LVPVPITNATLDR_5_4_0_2 | 70.5                                    | 0.0              | 6.6            | 0.0              | 100.0            | 0.0               | 29.8           | 0.0              | 1.1            | 0.0              | 7.3            | 0.0              | 66.7           | 0.0                   | None             |
| 275 | AGP exp_3   | 19503        | Alpha-1-acid glycoprotein 2 | LVPVPITNATLDR_5_4_0_2 | 46.0                                    | 0.0              | 0.0            | 0.0              | 100.0            | 0.0               | 44.2           | 0.0              | 6.7            | 0.0              | 0.0            | 0.0              | 61.6           | 0.0                   | None             |
| 276 | AGP exp_3   | 15678        | Alpha-1-acid glycoprotein 2 | LVPVPITNATLDR_5_4_0_2 | 36.6                                    | 0.0              | 8.1            | 0.0              | 100.0            | 0.0               | 44.9           | 0.0              | 0.0            | 0.0              | 16.1           | 0.0              | 88.4           | 0.0                   | None             |
| 277 | AGP exp_4   | 15381        | Alpha-1-acid glycoprotein 2 | LVPVPITNATLDR_5_4_0_2 | 95.5                                    | 0.0              | 0.0            | 0.0              | 100.0            | 0.0               | 30.9           | 0.0              | 0.0            | 0.0              | 9.8            | 0.0              | 75.5           | 0.0                   | None             |
| 278 | AGP exp_3   | 15761        | Alpha-1-acid glycoprotein 2 | LVPVPITNATLDR_5_4_1_2 | 40.0                                    | 0.0              | 0.0            | 0.0              | 100.0            | 51.5              | 96.8           | 0.0              | 5.4            | 0.0              | 0.0            | 0.0              | 65.1           | 0.0                   | Outer            |
| 279 | AGP exp_4   | 15367        | Alpha-1-acid glycoprotein 2 | LVPVPITNATLDR_5_4_1_2 | 16.3                                    | 0.0              | 9.3            | 0.0              | 54.2             | 20.4              | 100.0          | 0.0              | 0.0            | 0.0              | 0.0            | 0.0              | 0.0            | 0.0                   | Outer            |
| 280 | AGP exp_3   | 12326        | Alpha-1-acid glycoprotein 2 | LVPVPITNATLDR_5_5_0_1 | 53.0                                    | 0.0              | 0.0            | 0.0              | 72.1             | 0.0               | 100.0          | 0.0              | 0.0            | 0.0              | 12.0           | 0.0              | 55.6           | 0.0                   | None             |
| 281 | AGP exp_4   | 12020        | Alpha-1-acid glycoprotein 2 | LVPVPITNATLDR_5_5_0_1 | 54.6                                    | 0.0              | 0.0            | 0.0              | 89.9             | 0.0               | 100.0          | 0.0              | 5.7            | 0.0              | 12.9           | 0.0              | 78.2           | 0.0                   | None             |
| 282 | AGP exp_3   | 15537        | Alpha-1-acid glycoprotein 2 | LVPVPITNATLDR_5_5_1_2 | 0.0                                     | 0.0              | 0.0            | 0.0              | 100.0            | 30.2              | 50.4           | 0.0              | 5.4            | 0.0              | 0.0            | 0.0              | 11.0           | 0.0                   | Outer            |
| 283 | AGP exp_4   | 11892        | Alpha-1-acid glycoprotein 2 | LVPVPITNATLDR_6_5_0_1 | 46.3                                    | 0.0              | 0.0            | 0.0              | 67.3             | 0.0               | 100.0          | 0.0              | 0.0            | 0.0              | 10.9           | 0.0              | 22.3           | 0.0                   | None             |
| 284 | AGP exp_3   | 12405        | Alpha-1-acid glycoprotein 2 | LVPVPITNATLDR_6_5_0_1 | 47.8                                    | 0.0              | 0.0            | 0.0              | 62.0             | 0.0               | 100.0          | 0.0              | 0.0            | 0.0              | 7.0            | 0.0              | 18.4           | 0.0                   | None             |
| 285 | AGP exp_4   | 11843        | Alpha-1-acid glycoprotein 2 | LVPVPITNATLDR_6_5_0_1 | 100.0                                   | 0.0              | 8.0            | 0.0              | 18.3             | 0.0               | 15.0           | 0.0              | 2.6            | 0.0              | 10.8           | 0.0              | 34.1           | 0.0                   | None             |

Supplementary Table 2. Continued.

| No. | Experiments | CID Scan No. | N-glycoproteins             | N-glycopeptides       | Relative intensities of B/Y series ions |                  |                |                  |                  |                   |                |                  |                |                  |                |                  |                |                  | Manual Classification |
|-----|-------------|--------------|-----------------------------|-----------------------|-----------------------------------------|------------------|----------------|------------------|------------------|-------------------|----------------|------------------|----------------|------------------|----------------|------------------|----------------|------------------|-----------------------|
|     |             |              |                             |                       | B <sub>2</sub>                          | B <sub>2</sub> F | B <sub>3</sub> | B <sub>3</sub> F | B <sub>2</sub> S | B <sub>2</sub> SF | Y <sub>1</sub> | Y <sub>1</sub> F | Y <sub>2</sub> | Y <sub>2</sub> F | Y <sub>3</sub> | Y <sub>3</sub> F | Y <sub>4</sub> | Y <sub>4</sub> F |                       |
| 286 | AGP exp_3   | 12246        | Alpha-1-acid glycoprotein 2 | LVPVPITNATLDR_6_5_0_1 | 100.0                                   | 0.0              | 5.7            | 0.0              | 55.0             | 0.0               | 44.0           | 0.0              | 5.3            | 0.0              | 15.3           | 0.0              | 77.6           | 0.0              | None                  |
| 287 | AGP exp_3   | 11939        | Alpha-1-acid glycoprotein 2 | LVPVPITNATLDR_6_5_0_1 | 100.0                                   | 0.0              | 0.0            | 0.0              | 48.1             | 0.0               | 7.1            | 0.0              | 0.0            | 0.0              | 10.1           | 0.0              | 16.5           | 0.0              | None                  |
| 288 | AGP exp_3   | 15635        | Alpha-1-acid glycoprotein 2 | LVPVPITNATLDR_6_5_0_2 | 90.1                                    | 0.0              | 5.7            | 0.0              | 100.0            | 0.0               | 42.1           | 0.0              | 9.1            | 0.0              | 0.0            | 0.0              | 42.7           | 0.0              | None                  |
| 289 | AGP exp_3   | 15529        | Alpha-1-acid glycoprotein 2 | LVPVPITNATLDR_6_5_0_2 | 82.5                                    | 0.0              | 6.2            | 0.0              | 100.0            | 0.0               | 32.8           | 0.0              | 7.8            | 0.0              | 0.0            | 0.0              | 30.2           | 0.0              | None                  |
| 290 | AGP exp_4   | 15283        | Alpha-1-acid glycoprotein 2 | LVPVPITNATLDR_6_5_0_2 | 86.9                                    | 0.0              | 5.7            | 0.0              | 100.0            | 0.0               | 34.4           | 0.0              | 7.2            | 0.0              | 0.0            | 0.0              | 39.0           | 0.0              | None                  |
| 291 | AGP exp_4   | 14929        | Alpha-1-acid glycoprotein 2 | LVPVPITNATLDR_6_5_0_2 | 78.7                                    | 0.0              | 0.0            | 0.0              | 100.0            | 0.0               | 23.8           | 0.0              | 7.3            | 0.0              | 0.0            | 0.0              | 28.0           | 0.0              | None                  |
| 292 | AGP exp_4   | 15591        | Alpha-1-acid glycoprotein 2 | LVPVPITNATLDR_6_5_0_2 | 90.3                                    | 0.0              | 0.0            | 0.0              | 100.0            | 0.0               | 17.0           | 0.0              | 4.4            | 0.0              | 0.0            | 0.0              | 41.9           | 0.0              | None                  |
| 293 | AGP exp_4   | 19268        | Alpha-1-acid glycoprotein 2 | LVPVPITNATLDR_6_5_0_3 | 36.3                                    | 0.0              | 3.4            | 0.0              | 100.0            | 0.0               | 25.0           | 0.0              | 4.9            | 0.0              | 4.3            | 0.0              | 0.0            | 0.0              | None                  |
| 294 | AGP exp_4   | 19155        | Alpha-1-acid glycoprotein 2 | LVPVPITNATLDR_6_5_0_3 | 43.0                                    | 0.0              | 0.0            | 0.0              | 100.0            | 0.0               | 28.9           | 0.0              | 4.7            | 0.0              | 5.8            | 0.0              | 0.0            | 0.0              | None                  |
| 295 | AGP exp_3   | 19311        | Alpha-1-acid glycoprotein 2 | LVPVPITNATLDR_6_5_0_3 | 41.4                                    | 0.0              | 3.2            | 0.0              | 100.0            | 0.0               | 24.2           | 0.0              | 4.9            | 0.0              | 5.6            | 0.0              | 0.0            | 0.0              | None                  |
| 296 | AGP exp_4   | 18825        | Alpha-1-acid glycoprotein 2 | LVPVPITNATLDR_6_5_0_3 | 45.1                                    | 0.0              | 0.0            | 0.0              | 100.0            | 0.0               | 24.2           | 0.0              | 4.9            | 0.0              | 5.6            | 0.0              | 0.0            | 0.0              | None                  |
| 297 | AGP exp_3   | 19438        | Alpha-1-acid glycoprotein 2 | LVPVPITNATLDR_6_5_0_3 | 0.0                                     | 0.0              | 0.0            | 0.0              | 8.4              | 0.0               | 100.0          | 0.0              | 16.7           | 0.0              | 8.5            | 0.0              | 3.6            | 0.0              | None                  |
| 298 | AGP exp_4   | 11669        | Alpha-1-acid glycoprotein 2 | LVPVPITNATLDR_6_5_1_1 | 40.7                                    | 28.8             | 0.0            | 0.0              | 71.9             | 29.4              | 100.0          | 0.0              | 0.0            | 0.0              | 0.0            | 0.0              | 21.0           | 0.0              | Outer                 |
| 299 | AGP exp_4   | 15088        | Alpha-1-acid glycoprotein 2 | LVPVPITNATLDR_6_5_1_1 | 81.4                                    | 66.9             | 0.0            | 0.0              | 59.5             | 44.8              | 100.0          | 0.0              | 0.0            | 0.0              | 0.0            | 0.0              | 0.0            | 0.0              | Outer                 |
| 300 | AGP exp_3   | 12104        | Alpha-1-acid glycoprotein 2 | LVPVPITNATLDR_6_5_1_1 | 49.5                                    | 24.6             | 0.0            | 0.0              | 86.5             | 68.6              | 100.0          | 0.0              | 0.0            | 0.0              | 0.0            | 0.0              | 0.0            | 0.0              | Outer                 |
| 301 | AGP exp_4   | 11993        | Alpha-1-acid glycoprotein 2 | LVPVPITNATLDR_6_5_1_1 | 65.0                                    | 36.5             | 0.0            | 0.0              | 61.7             | 53.4              | 100.0          | 0.0              | 0.0            | 0.0              | 0.0            | 0.0              | 0.0            | 0.0              | Outer                 |
| 302 | AGP exp_3   | 15640        | Alpha-1-acid glycoprotein 2 | LVPVPITNATLDR_6_5_1_2 | 0.0                                     | 14.7             | 0.0            | 0.0              | 100.0            | 55.1              | 92.1           | 0.0              | 0.0            | 0.0              | 7.1            | 0.0              | 17.2           | 0.0              | Outer                 |
| 303 | AGP exp_4   | 15128        | Alpha-1-acid glycoprotein 2 | LVPVPITNATLDR_6_5_1_2 | 0.0                                     | 11.2             | 0.0            | 0.0              | 100.0            | 62.0              | 85.0           | 0.0              | 0.0            | 0.0              | 0.0            | 0.0              | 22.4           | 0.0              | Outer                 |
| 304 | AGP exp_4   | 15447        | Alpha-1-acid glycoprotein 2 | LVPVPITNATLDR_6_5_1_2 | 0.0                                     | 10.0             | 0.0            | 0.0              | 100.0            | 44.9              | 80.8           | 0.0              | 0.0            | 0.0              | 6.7            | 0.0              | 26.0           | 0.0              | Outer                 |
| 305 | AGP exp_4   | 14800        | Alpha-1-acid glycoprotein 2 | LVPVPITNATLDR_6_5_1_2 | 0.0                                     | 12.2             | 0.0            | 0.0              | 100.0            | 12.5              | 76.7           | 0.0              | 0.0            | 0.0              | 0.0            | 0.0              | 8.0            | 0.0              | Outer                 |
| 306 | AGP exp_3   | 15285        | Alpha-1-acid glycoprotein 2 | LVPVPITNATLDR_6_5_1_2 | 64.0                                    | 13.3             | 0.0            | 0.0              | 100.0            | 16.4              | 34.1           | 0.0              | 5.4            | 0.0              | 0.0            | 0.0              | 24.6           | 0.0              | Outer                 |
| 307 | AGP exp_4   | 15172        | Alpha-1-acid glycoprotein 2 | LVPVPITNATLDR_6_5_1_2 | 92.4                                    | 14.7             | 4.6            | 0.0              | 100.0            | 31.8              | 35.3           | 0.0              | 0.0            | 0.0              | 15.0           | 0.0              | 37.3           | 3.6              | Outer                 |
| 308 | AGP exp_4   | 14833        | Alpha-1-acid glycoprotein 2 | LVPVPITNATLDR_6_5_1_2 | 72.3                                    | 15.2             | 0.0            | 0.0              | 100.0            | 0.0               | 24.4           | 0.0              | 3.1            | 0.0              | 8.5            | 0.0              | 19.2           | 0.0              | Outer                 |
| 309 | AGP exp_4   | 19281        | Alpha-1-acid glycoprotein 2 | LVPVPITNATLDR_6_5_1_3 | 0.0                                     | 0.0              | 0.0            | 0.0              | 100.0            | 40.2              | 55.1           | 0.0              | 0.0            | 0.0              | 7.9            | 0.0              | 14.2           | 0.0              | Outer                 |
| 310 | AGP exp_3   | 19654        | Alpha-1-acid glycoprotein 2 | LVPVPITNATLDR_6_5_1_3 | 0.0                                     | 5.3              | 7.3            | 0.0              | 100.0            | 43.0              | 50.4           | 0.0              | 2.1            | 0.0              | 6.7            | 0.0              | 14.2           | 0.0              | Outer                 |
| 311 | AGP exp_3   | 19081        | Alpha-1-acid glycoprotein 2 | LVPVPITNATLDR_6_5_1_3 | 38.6                                    | 0.0              | 0.0            | 0.0              | 100.0            | 16.4              | 21.0           | 0.0              | 0.0            | 0.0              | 5.5            | 0.0              | 0.0            | 0.0              | Outer                 |



Supplementary Table 2. Continued.

| No. | Experiments | CID Scan No. | N-glycoproteins           | N-glycopeptides   | Relative intensities of B/Y series ions |                  |                |                  |                  |                   |                |                  |                |                  |                |                  |                |                  | Manual Classification |
|-----|-------------|--------------|---------------------------|-------------------|-----------------------------------------|------------------|----------------|------------------|------------------|-------------------|----------------|------------------|----------------|------------------|----------------|------------------|----------------|------------------|-----------------------|
|     |             |              |                           |                   | B <sub>2</sub>                          | B <sub>2</sub> F | B <sub>3</sub> | B <sub>3</sub> F | B <sub>2</sub> S | B <sub>2</sub> SF | Y <sub>1</sub> | Y <sub>1</sub> F | Y <sub>2</sub> | Y <sub>2</sub> F | Y <sub>3</sub> | Y <sub>3</sub> F | Y <sub>4</sub> | Y <sub>4</sub> F |                       |
| 312 | IgG exp_7   | 6000         | Ig gamma-1 chain C region | EEQYNSTYR_3_3_0_0 | 11.3                                    | 0.0              | 7.2            | 0.0              | 0.0              | 0.0               | 100.0          | 0.0              | 11.4           | 0.0              | 20.1           | 0.0              | 53.0           | 0.0              | None                  |
| 313 | IgG exp_7   | 6058         | Ig gamma-1 chain C region | EEQYNSTYR_3_3_1_0 | 13.4                                    | 0.0              | 11.3           | 0.0              | 0.0              | 0.0               | 100.0          | 64.7             | 19.5           | 3.6              | 24.8           | 7.6              | 51.5           | 12.7             | Core                  |
| 314 | IgG exp_7   | 6726         | Ig gamma-1 chain C region | EEQYNSTYR_3_3_1_0 | 6.3                                     | 0.0              | 12.8           | 0.0              | 0.0              | 0.0               | 100.0          | 66.3             | 17.3           | 3.2              | 22.5           | 9.6              | 51.1           | 17.2             | Core                  |
| 315 | IgG exp_7   | 6394         | Ig gamma-1 chain C region | EEQYNSTYR_3_3_1_0 | 13.1                                    | 0.0              | 13.0           | 2.4              | 0.0              | 0.0               | 100.0          | 60.6             | 16.3           | 3.1              | 22.9           | 10.6             | 44.6           | 14.9             | Core                  |
| 316 | IgG exp_7   | 7005         | Ig gamma-1 chain C region | EEQYNSTYR_3_3_1_0 | 3.6                                     | 0.0              | 13.5           | 2.1              | 0.0              | 0.0               | 100.0          | 51.6             | 11.7           | 0.0              | 15.1           | 5.9              | 35.5           | 17.3             | Core                  |
| 317 | IgG exp_6   | 4370         | Ig gamma-1 chain C region | EEQYNSTYR_3_3_1_0 | 10.9                                    | 2.1              | 13.4           | 1.9              | 0.0              | 0.0               | 100.0          | 56.7             | 21.4           | 3.7              | 21.0           | 12.2             | 41.6           | 12.7             | Core                  |
| 318 | IgG exp_7   | 6311         | Ig gamma-1 chain C region | EEQYNSTYR_3_4_0_0 | 4.3                                     | 0.0              | 9.4            | 0.0              | 0.0              | 0.0               | 100.0          | 0.0              | 19.3           | 0.0              | 19.0           | 0.0              | 34.4           | 0.0              | None                  |
| 319 | IgG exp_7   | 6631         | Ig gamma-1 chain C region | EEQYNSTYR_3_4_0_0 | 0.0                                     | 0.0              | 9.3            | 0.0              | 0.0              | 0.0               | 100.0          | 0.0              | 21.8           | 0.0              | 19.2           | 0.0              | 36.8           | 0.0              | None                  |
| 320 | IgG exp_7   | 5973         | Ig gamma-1 chain C region | EEQYNSTYR_3_4_0_0 | 2.0                                     | 0.0              | 8.0            | 0.0              | 0.0              | 0.0               | 100.0          | 0.0              | 19.9           | 0.0              | 16.7           | 0.0              | 33.0           | 0.0              | None                  |
| 321 | IgG exp_6   | 4399         | Ig gamma-1 chain C region | EEQYNSTYR_3_4_0_0 | 5.2                                     | 0.0              | 7.2            | 0.0              | 0.0              | 0.0               | 100.0          | 1.5              | 25.4           | 0.0              | 18.1           | 0.0              | 32.3           | 0.0              | None                  |
| 322 | IgG exp_7   | 7845         | Ig gamma-1 chain C region | EEQYNSTYR_3_4_1_0 | 0.0                                     | 0.0              | 7.7            | 0.0              | 0.0              | 0.0               | 100.0          | 61.2             | 10.6           | 0.0              | 10.5           | 0.0              | 36.3           | 0.0              | Core                  |
| 323 | IgG exp_7   | 5295         | Ig gamma-1 chain C region | EEQYNSTYR_3_4_1_0 | 0.0                                     | 0.0              | 16.9           | 0.0              | 0.0              | 0.0               | 100.0          | 69.6             | 25.5           | 7.6              | 14.6           | 3.4              | 32.2           | 21.9             | Core                  |
| 324 | IgG exp_7   | 6085         | Ig gamma-1 chain C region | EEQYNSTYR_3_4_1_0 | 0.0                                     | 0.0              | 8.4            | 0.0              | 0.0              | 0.0               | 100.0          | 51.7             | 17.0           | 5.0              | 14.4           | 2.1              | 22.8           | 5.3              | Core                  |
| 325 | IgG exp_7   | 6421         | Ig gamma-1 chain C region | EEQYNSTYR_3_4_1_0 | 0.0                                     | 0.0              | 8.8            | 0.0              | 0.0              | 0.0               | 100.0          | 52.4             | 18.0           | 4.9              | 15.6           | 0.0              | 25.2           | 6.3              | Core                  |
| 326 | IgG exp_7   | 6739         | Ig gamma-1 chain C region | EEQYNSTYR_3_4_1_0 | 0.0                                     | 0.0              | 9.2            | 0.0              | 0.0              | 0.0               | 100.0          | 51.5             | 18.9           | 5.1              | 15.4           | 2.7              | 23.3           | 6.8              | Core                  |
| 327 | IgG exp_7   | 7490         | Ig gamma-1 chain C region | EEQYNSTYR_3_4_1_0 | 0.0                                     | 0.0              | 15.5           | 0.0              | 0.0              | 0.0               | 100.0          | 73.9             | 17.1           | 4.3              | 19.9           | 7.5              | 40.7           | 19.6             | Core                  |
| 328 | IgG exp_7   | 7021         | Ig gamma-1 chain C region | EEQYNSTYR_3_4_1_0 | 0.0                                     | 0.0              | 10.9           | 0.0              | 0.0              | 0.0               | 100.0          | 52.9             | 20.0           | 4.8              | 18.1           | 0.0              | 28.2           | 9.6              | Core                  |
| 329 | IgG exp_5   | 3033         | Ig gamma-1 chain C region | EEQYNSTYR_3_4_1_0 | 0.0                                     | 0.0              | 9.8            | 0.0              | 0.0              | 0.0               | 100.0          | 53.1             | 17.5           | 5.1              | 14.8           | 0.0              | 24.3           | 6.1              | Core                  |
| 330 | IgG exp_7   | 5764         | Ig gamma-1 chain C region | EEQYNSTYR_3_4_1_0 | 0.0                                     | 0.0              | 18.7           | 0.0              | 0.0              | 0.0               | 100.0          | 66.5             | 16.7           | 0.0              | 19.7           | 0.0              | 34.5           | 18.2             | Core                  |
| 331 | IgG exp_7   | 7667         | Ig gamma-1 chain C region | EEQYNSTYR_3_4_1_0 | 0.0                                     | 0.0              | 14.1           | 0.0              | 0.0              | 0.0               | 100.0          | 60.5             | 10.0           | 0.0              | 12.4           | 3.9              | 29.6           | 11.0             | Core                  |
| 332 | IgG exp_7   | 7268         | Ig gamma-1 chain C region | EEQYNSTYR_3_4_1_0 | 0.0                                     | 0.0              | 13.8           | 0.0              | 0.0              | 0.0               | 100.0          | 73.6             | 24.6           | 7.5              | 24.6           | 2.6              | 42.9           | 20.7             | Core                  |
| 333 | IgG exp_7   | 8322         | Ig gamma-1 chain C region | EEQYNSTYR_3_4_1_0 | 0.0                                     | 0.0              | 16.5           | 0.0              | 0.0              | 0.0               | 100.0          | 73.2             | 40.7           | 26.6             | 23.9           | 7.0              | 15.5           | 9.3              | Core                  |
| 334 | IgG exp_7   | 7954         | Ig gamma-1 chain C region | EEQYNSTYR_3_5_0_0 | 0.0                                     | 0.0              | 2.4            | 0.0              | 0.0              | 0.0               | 100.0          | 0.0              | 39.4           | 0.0              | 7.8            | 0.0              | 13.5           | 0.0              | None                  |
| 335 | IgG exp_7   | 8666         | Ig gamma-1 chain C region | EEQYNSTYR_3_5_1_0 | 0.0                                     | 0.0              | 5.8            | 0.0              | 0.0              | 0.0               | 100.0          | 61.9             | 36.4           | 20.8             | 15.1           | 6.0              | 14.5           | 5.5              | Core                  |
| 336 | IgG exp_6   | 4420         | Ig gamma-1 chain C region | EEQYNSTYR_3_5_1_0 | 0.0                                     | 0.0              | 3.4            | 0.0              | 0.0              | 0.0               | 100.0          | 41.8             | 32.0           | 11.0             | 12.6           | 0.0              | 11.5           | 2.4              | Core                  |
| 337 | IgG exp_7   | 8314         | Ig gamma-1 chain C region | EEQYNSTYR_3_5_1_0 | 0.0                                     | 0.0              | 4.1            | 0.0              | 0.0              | 0.0               | 100.0          | 58.0             | 37.5           | 18.4             | 18.5           | 5.5              | 11.2           | 4.3              | Core                  |

Supplementary Table 2. Continued.

| No. | Experiments | CID Scan No. | N-glycoproteins           | N-glycopeptides   | Relative intensities of B/Y series ions |                  |                |                  |                  |                   |                |                  |                |                  |                |                  |                |                  | Manual Classification |
|-----|-------------|--------------|---------------------------|-------------------|-----------------------------------------|------------------|----------------|------------------|------------------|-------------------|----------------|------------------|----------------|------------------|----------------|------------------|----------------|------------------|-----------------------|
|     |             |              |                           |                   | B <sub>2</sub>                          | B <sub>2</sub> F | B <sub>3</sub> | B <sub>3</sub> F | B <sub>2</sub> S | B <sub>2</sub> SF | Y <sub>1</sub> | Y <sub>1</sub> F | Y <sub>2</sub> | Y <sub>2</sub> F | Y <sub>3</sub> | Y <sub>3</sub> F | Y <sub>4</sub> | Y <sub>4</sub> F |                       |
| 338 | IgG exp_7   | 6199         | Ig gamma-1 chain C region | EEQYNSTYR_4_3_1_0 | 11.5                                    | 4.5              | 12.1           | 0.0              | 0.0              | 0.0               | 100.0          | 88.7             | 11.8           | 5.3              | 9.2            | 3.9              | 33.7           | 7.6              | Core                  |
| 339 | IgG exp_7   | 6537         | Ig gamma-1 chain C region | EEQYNSTYR_4_3_1_0 | 10.6                                    | 3.5              | 11.1           | 0.0              | 0.0              | 0.0               | 100.0          | 92.3             | 8.9            | 0.0              | 10.5           | 2.3              | 34.5           | 10.0             | Core                  |
| 340 | IgG exp_6   | 4360         | Ig gamma-1 chain C region | EEQYNSTYR_4_4_0_0 | 0.0                                     | 0.0              | 7.0            | 0.0              | 0.0              | 0.0               | 100.0          | 0.0              | 15.1           | 0.0              | 14.4           | 0.0              | 31.2           | 0.0              | None                  |
| 341 | IgG exp_7   | 5761         | Ig gamma-1 chain C region | EEQYNSTYR_4_4_0_0 | 0.0                                     | 0.0              | 5.9            | 0.0              | 0.0              | 0.0               | 100.0          | 0.0              | 14.0           | 0.0              | 14.4           | 0.0              | 33.2           | 0.0              | None                  |
| 342 | IgG exp_7   | 6089         | Ig gamma-1 chain C region | EEQYNSTYR_4_4_0_0 | 0.0                                     | 0.0              | 6.4            | 0.0              | 0.0              | 0.0               | 100.0          | 0.0              | 15.3           | 0.0              | 12.6           | 0.0              | 30.0           | 0.0              | None                  |
| 343 | IgG exp_7   | 6427         | Ig gamma-1 chain C region | EEQYNSTYR_4_4_0_0 | 0.0                                     | 0.0              | 7.2            | 0.0              | 0.0              | 0.0               | 100.0          | 3.3              | 13.9           | 0.0              | 11.6           | 0.0              | 36.1           | 0.0              | None                  |
| 344 | IgG exp_6   | 4341         | Ig gamma-1 chain C region | EEQYNSTYR_4_4_1_0 | 100.0                                   | 0.0              | 0.0            | 0.0              | 0.0              | 0.0               | 44.6           | 40.6             | 0.0            | 0.0              | 0.0            | 0.0              | 29.8           | 44.6             | Core                  |
| 345 | IgG exp_7   | 5171         | Ig gamma-1 chain C region | EEQYNSTYR_4_4_1_0 | 0.0                                     | 0.0              | 9.1            | 0.0              | 0.0              | 0.0               | 5.0            | 100.0            | 14.6           | 12.6             | 8.6            | 14.2             | 15.2           | 10.2             | Core                  |
| 346 | IgG exp_7   | 5650         | Ig gamma-1 chain C region | EEQYNSTYR_4_4_1_0 | 0.0                                     | 0.0              | 15.4           | 0.0              | 0.0              | 0.0               | 13.4           | 100.0            | 4.9            | 0.0              | 5.0            | 0.0              | 26.9           | 9.1              | Core                  |
| 347 | IgG exp_7   | 6917         | Ig gamma-1 chain C region | EEQYNSTYR_4_4_1_0 | 0.0                                     | 3.3              | 10.5           | 0.0              | 0.0              | 0.0               | 15.2           | 100.0            | 21.9           | 12.6             | 19.9           | 0.0              | 36.2           | 5.3              | Core                  |
| 348 | IgG exp_7   | 5940         | Ig gamma-1 chain C region | EEQYNSTYR_4_4_1_0 | 0.0                                     | 2.7              | 10.3           | 0.0              | 0.0              | 0.0               | 14.2           | 100.0            | 21.1           | 12.0             | 19.4           | 6.4              | 32.5           | 4.5              | Core                  |
| 349 | IgG exp_7   | 8525         | Ig gamma-1 chain C region | EEQYNSTYR_4_4_1_0 | 0.0                                     | 13.2             | 14.7           | 0.0              | 0.0              | 0.0               | 22.9           | 100.0            | 16.7           | 0.0              | 0.0            | 0.0              | 0.0            | 0.0              | Core                  |
| 350 | IgG exp_7   | 6616         | Ig gamma-1 chain C region | EEQYNSTYR_4_4_1_0 | 0.0                                     | 2.9              | 10.6           | 0.0              | 0.0              | 0.0               | 9.3            | 100.0            | 23.1           | 12.6             | 20.3           | 0.0              | 34.5           | 5.4              | Core                  |
| 351 | IgG exp_7   | 7164         | Ig gamma-1 chain C region | EEQYNSTYR_4_4_1_0 | 0.0                                     | 0.0              | 15.5           | 0.0              | 0.0              | 0.0               | 16.2           | 100.0            | 22.6           | 13.4             | 24.2           | 6.8              | 41.0           | 9.9              | Core                  |
| 352 | IgG exp_7   | 6278         | Ig gamma-1 chain C region | EEQYNSTYR_4_4_1_0 | 0.0                                     | 2.8              | 10.9           | 0.0              | 0.0              | 0.0               | 8.1            | 100.0            | 22.3           | 12.4             | 20.6           | 2.7              | 33.5           | 5.4              | Core                  |
| 353 | IgG exp_5   | 3064         | Ig gamma-1 chain C region | EEQYNSTYR_4_4_1_0 | 0.0                                     | 3.4              | 10.8           | 0.0              | 0.0              | 0.0               | 14.5           | 100.0            | 22.0           | 11.2             | 19.1           | 8.2              | 35.4           | 3.9              | Core                  |
| 354 | IgG exp_7   | 7396         | Ig gamma-1 chain C region | EEQYNSTYR_4_4_1_0 | 0.0                                     | 0.0              | 10.9           | 0.0              | 0.0              | 0.0               | 7.7            | 100.0            | 19.5           | 10.3             | 17.8           | 0.0              | 41.2           | 7.2              | Core                  |
| 355 | IgG exp_6   | 4339         | Ig gamma-1 chain C region | EEQYNSTYR_4_4_1_0 | 0.0                                     | 2.3              | 7.4            | 0.0              | 0.0              | 0.0               | 11.2           | 100.0            | 26.7           | 12.0             | 17.8           | 0.0              | 29.4           | 5.6              | Core                  |
| 356 | IgG exp_7   | 9802         | Ig gamma-1 chain C region | EEQYNSTYR_4_4_1_1 | 65.3                                    | 0.0              | 16.0           | 0.0              | 100.0            | 0.0               | 43.3           | 42.8             | 0.0            | 0.0              | 0.0            | 0.0              | 27.0           | 18.8             | Core                  |
| 357 | IgG exp_7   | 9812         | Ig gamma-1 chain C region | EEQYNSTYR_4_4_1_1 | 0.0                                     | 0.0              | 6.7            | 0.0              | 16.5             | 0.0               | 100.0          | 0.0              | 17.8           | 13.8             | 14.3           | 0.0              | 27.8           | 3.9              | Core                  |
| 358 | IgG exp_6   | 4424         | Ig gamma-1 chain C region | EEQYNSTYR_4_5_1_0 | 0.0                                     | 0.0              | 6.0            | 0.0              | 0.0              | 0.0               | 100.0          | 85.9             | 31.5           | 20.8             | 11.5           | 0.0              | 12.2           | 0.0              | Core                  |
| 359 | IgG exp_7   | 8461         | Ig gamma-1 chain C region | EEQYNSTYR_4_5_1_0 | 0.0                                     | 0.0              | 4.1            | 0.0              | 0.0              | 0.0               | 100.0          | 77.1             | 32.3           | 18.0             | 12.0           | 2.8              | 10.0           | 0.0              | Core                  |
| 360 | IgG exp_7   | 5975         | Ig gamma-1 chain C region | EEQYNSTYR_5_4_0_0 | 0.0                                     | 0.0              | 6.8            | 0.0              | 0.0              | 0.0               | 100.0          | 3.8              | 13.4           | 0.0              | 10.7           | 0.0              | 33.5           | 0.0              | None                  |
| 361 | IgG exp_5   | 3029         | Ig gamma-1 chain C region | EEQYNSTYR_5_4_1_0 | 0.0                                     | 0.0              | 8.3            | 0.0              | 0.0              | 0.0               | 100.0          | 99.1             | 15.4           | 18.3             | 17.3           | 9.0              | 35.7           | 4.6              | Core                  |
| 362 | IgG exp_7   | 6087         | Ig gamma-1 chain C region | EEQYNSTYR_5_4_1_0 | 0.0                                     | 2.8              | 7.6            | 0.0              | 0.0              | 0.0               | 100.0          | 90.8             | 15.9           | 13.8             | 14.8           | 8.6              | 29.7           | 0.0              | Core                  |
| 363 | IgG exp_7   | 6423         | Ig gamma-1 chain C region | EEQYNSTYR_5_4_1_0 | 0.0                                     | 2.9              | 9.1            | 0.0              | 0.0              | 0.0               | 100.0          | 92.5             | 17.8           | 13.8             | 17.7           | 8.5              | 30.4           | 0.0              | Core                  |

Supplementary Table 2. Continued.

| No. | Experiments | CID Scan No. | N-glycoproteins           | N-glycopeptides   | Relative intensities of B/Y series ions |                  |                |                  |                  |                   |                |                  |                |                  |                |                  |                |                  | Manual Classification |
|-----|-------------|--------------|---------------------------|-------------------|-----------------------------------------|------------------|----------------|------------------|------------------|-------------------|----------------|------------------|----------------|------------------|----------------|------------------|----------------|------------------|-----------------------|
|     |             |              |                           |                   | B <sub>2</sub>                          | B <sub>2</sub> F | B <sub>3</sub> | B <sub>3</sub> F | B <sub>2</sub> S | B <sub>2</sub> SF | Y <sub>1</sub> | Y <sub>1</sub> F | Y <sub>2</sub> | Y <sub>2</sub> F | Y <sub>3</sub> | Y <sub>3</sub> F | Y <sub>4</sub> | Y <sub>4</sub> F |                       |
| 364 | IgG exp_7   | 6741         | Ig gamma-1 chain C region | EEQYNSTYR_5_4_1_0 | 0.0                                     | 2.9              | 8.5            | 0.0              | 0.0              | 0.0               | 100.0          | 90.6             | 16.7           | 16.5             | 15.9           | 10.4             | 34.8           | 3.1              | Core                  |
| 365 | IgG exp_7   | 9750         | Ig gamma-1 chain C region | EEQYNSTYR_5_4_1_1 | 100.0                                   | 0.0              | 11.7           | 0.0              | 77.1             | 0.0               | 37.2           | 43.6             | 0.0            | 0.0              | 0.0            | 0.0              | 11.3           | 0.0              | Core                  |
| 366 | IgG exp_6   | 4859         | Ig gamma-1 chain C region | EEQYNSTYR_5_4_1_1 | 0.0                                     | 0.0              | 5.7            | 0.0              | 16.8             | 0.0               | 100.0          | 98.4             | 15.9           | 16.7             | 14.1           | 9.9              | 28.1           | 3.4              | Core                  |
| 367 | IgG exp_7   | 9769         | Ig gamma-1 chain C region | EEQYNSTYR_5_4_1_1 | 0.0                                     | 0.0              | 2.8            | 0.0              | 17.0             | 0.0               | 97.4           | 100.0            | 15.7           | 15.5             | 16.6           | 10.9             | 27.4           | 0.0              | Core                  |
| 368 | IgG exp_7   | 10599        | Ig gamma-2 chain C region | EEQFNSTFR_3_3_1_0 | 7.5                                     | 0.0              | 8.7            | 0.0              | 0.0              | 0.0               | 100.0          | 49.0             | 13.1           | 2.2              | 13.1           | 3.5              | 22.3           | 4.6              | Core                  |
| 369 | IgG exp_7   | 10686        | Ig gamma-2 chain C region | EEQFNSTFR_3_4_0_0 | 3.6                                     | 0.0              | 7.0            | 0.0              | 0.0              | 0.0               | 100.0          | 0.0              | 17.1           | 0.0              | 16.3           | 0.0              | 28.1           | 0.0              | None                  |
| 370 | IgG exp_5   | 3427         | Ig gamma-2 chain C region | EEQFNSTFR_3_4_1_0 | 2.8                                     | 0.0              | 12.1           | 2.0              | 0.0              | 0.0               | 100.0          | 58.4             | 20.2           | 8.7              | 17.9           | 5.4              | 36.4           | 12.9             | Core                  |
| 371 | IgG exp_7   | 10461        | Ig gamma-2 chain C region | EEQFNSTFR_3_4_1_0 | 1.6                                     | 0.0              | 7.2            | 0.0              | 0.0              | 0.0               | 100.0          | 47.4             | 17.3           | 5.2              | 16.5           | 0.0              | 25.8           | 8.8              | Core                  |
| 372 | IgG exp_7   | 10811        | Ig gamma-2 chain C region | EEQFNSTFR_3_4_1_0 | 0.0                                     | 0.0              | 8.6            | 0.0              | 0.0              | 0.0               | 100.0          | 55.1             | 21.6           | 6.1              | 18.1           | 3.4              | 27.9           | 7.2              | Core                  |
| 373 | IgG exp_7   | 10689        | Ig gamma-2 chain C region | EEQFNSTFR_3_5_1_0 | 16.8                                    | 0.0              | 0.0            | 0.0              | 0.0              | 0.0               | 100.0          | 22.7             | 22.8           | 0.0              | 36.2           | 0.0              | 0.0            | 0.0              | Core                  |
| 374 | IgG exp_7   | 10691        | Ig gamma-2 chain C region | EEQFNSTFR_3_5_1_0 | 0.0                                     | 0.0              | 4.0            | 0.0              | 0.0              | 0.0               | 100.0          | 55.4             | 35.5           | 17.1             | 13.9           | 0.0              | 10.4           | 2.8              | Core                  |
| 375 | IgG exp_5   | 3453         | Ig gamma-2 chain C region | EEQFNSTFR_3_5_1_0 | 0.0                                     | 0.0              | 5.6            | 0.0              | 0.0              | 0.0               | 100.0          | 68.8             | 39.8           | 14.2             | 14.9           | 2.2              | 14.9           | 7.2              | Core                  |
| 376 | IgG exp_7   | 10581        | Ig gamma-2 chain C region | EEQFNSTFR_4_3_1_0 | 14.0                                    | 2.7              | 10.6           | 0.0              | 0.0              | 0.0               | 100.0          | 76.0             | 12.9           | 4.4              | 9.2            | 0.0              | 29.5           | 3.3              | Core                  |
| 377 | IgG exp_7   | 10655        | Ig gamma-2 chain C region | EEQFNSTFR_4_4_0_0 | 4.0                                     | 0.0              | 7.3            | 0.0              | 0.0              | 0.0               | 100.0          | 0.0              | 19.1           | 0.0              | 17.4           | 0.0              | 33.8           | 0.0              | None                  |
| 378 | IgG exp_5   | 3408         | Ig gamma-2 chain C region | EEQFNSTFR_4_4_1_0 | 0.0                                     | 2.0              | 7.4            | 0.0              | 0.0              | 0.0               | 100.0          | 66.7             | 18.6           | 10.0             | 15.9           | 0.0              | 27.2           | 4.0              | Core                  |
| 379 | IgG exp_7   | 10720        | Ig gamma-2 chain C region | EEQFNSTFR_4_4_1_0 | 0.0                                     | 2.5              | 8.4            | 0.0              | 0.0              | 0.0               | 100.0          | 65.8             | 18.3           | 12.1             | 15.8           | 7.1              | 26.8           | 4.3              | Core                  |
| 380 | IgG exp_6   | 6063         | Ig gamma-2 chain C region | EEQFNSTFR_4_4_1_0 | 0.0                                     | 0.0              | 13.7           | 0.0              | 0.0              | 0.0               | 100.0          | 95.3             | 20.2           | 13.9             | 20.7           | 9.6              | 44.1           | 10.4             | Core                  |
| 381 | IgG exp_7   | 10382        | Ig gamma-2 chain C region | EEQFNSTFR_4_4_1_0 | 0.0                                     | 2.8              | 12.5           | 0.0              | 0.0              | 0.0               | 100.0          | 85.4             | 18.5           | 12.4             | 17.3           | 13.3             | 40.1           | 10.3             | Core                  |
| 382 | IgG exp_6   | 5157         | Ig gamma-2 chain C region | EEQFNSTFR_4_4_1_0 | 0.0                                     | 3.5              | 20.7           | 0.0              | 0.0              | 0.0               | 100.0          | 77.1             | 17.3           | 10.2             | 15.6           | 0.0              | 35.7           | 10.3             | Core                  |
| 383 | IgG exp_7   | 10722        | Ig gamma-2 chain C region | EEQFNSTFR_4_4_1_0 | 100.0                                   | 0.0              | 0.0            | 0.0              | 0.0              | 0.0               | 31.1           | 36.3             | 0.0            | 0.0              | 0.0            | 0.0              | 20.0           | 46.1             | Core                  |
| 384 | IgG exp_7   | 12133        | Ig gamma-2 chain C region | EEQFNSTFR_4_4_1_1 | 70.6                                    | 0.0              | 15.8           | 0.0              | 100.0            | 0.0               | 62.6           | 46.9             | 0.0            | 0.0              | 11.0           | 0.0              | 28.8           | 0.0              | Core                  |
| 385 | IgG exp_5   | 3739         | Ig gamma-2 chain C region | EEQFNSTFR_4_4_1_1 | 0.0                                     | 0.0              | 8.5            | 0.0              | 20.0             | 0.0               | 100.0          | 78.5             | 21.2           | 14.7             | 15.4           | 8.8              | 37.6           | 4.7              | Core                  |
| 386 | IgG exp_7   | 12154        | Ig gamma-2 chain C region | EEQFNSTFR_4_4_1_1 | 0.0                                     | 0.0              | 14.0           | 0.0              | 28.4             | 0.0               | 100.0          | 70.3             | 19.8           | 11.6             | 14.5           | 8.0              | 29.4           | 5.2              | Core                  |
| 387 | IgG exp_5   | 3735         | Ig gamma-2 chain C region | EEQFNSTFR_4_4_1_1 | 64.0                                    | 0.0              | 18.9           | 0.0              | 100.0            | 0.0               | 38.5           | 52.7             | 0.0            | 0.0              | 0.0            | 0.0              | 34.9           | 0.0              | Core                  |
| 388 | IgG exp_7   | 10653        | Ig gamma-2 chain C region | EEQFNSTFR_4_5_1_0 | 0.0                                     | 0.0              | 4.6            | 0.0              | 0.0              | 0.0               | 100.0          | 74.9             | 32.8           | 21.5             | 10.1           | 3.0              | 9.1            | 0.0              | Core                  |
| 389 | IgG exp_5   | 3400         | Ig gamma-2 chain C region | EEQFNSTFR_5_4_1_0 | 0.0                                     | 3.2              | 8.0            | 0.0              | 0.0              | 0.0               | 100.0          | 90.6             | 18.1           | 14.9             | 16.9           | 9.8              | 29.6           | 0.0              | Core                  |

**Supplementary Table 2.** Continued.

| No. | Experiments | CID Scan No. | N-glycoproteins           | N-glycopeptides   | Relative intensities of B/Y series ions |                  |                |                  |                  |                   |                |                  |                |                  |                |                  |                |                  | Manual Classification |
|-----|-------------|--------------|---------------------------|-------------------|-----------------------------------------|------------------|----------------|------------------|------------------|-------------------|----------------|------------------|----------------|------------------|----------------|------------------|----------------|------------------|-----------------------|
|     |             |              |                           |                   | B <sub>2</sub>                          | B <sub>2</sub> F | B <sub>3</sub> | B <sub>3</sub> F | B <sub>2</sub> S | B <sub>2</sub> SF | Y <sub>1</sub> | Y <sub>1</sub> F | Y <sub>2</sub> | Y <sub>2</sub> F | Y <sub>3</sub> | Y <sub>3</sub> F | Y <sub>4</sub> | Y <sub>4</sub> F |                       |
| 390 | IgG exp_7   | 10548        | Ig gamma-2 chain C region | EEQFNSTFR_5_4_1_0 | 0.0                                     | 2.6              | 6.6            | 0.0              | 0.0              | 0.0               | 100.0          | 90.9             | 18.2           | 14.9             | 16.6           | 8.6              | 29.5           | 2.2              | Core                  |
| 391 | IgG exp_7   | 12088        | Ig gamma-2 chain C region | EEQFNSTFR_5_4_1_1 | 0.0                                     | 3.5              | 9.0            | 0.0              | 23.7             | 0.0               | 85.7           | 100.0            | 11.6           | 12.7             | 10.6           | 7.3              | 22.4           | 0.0              | Core                  |
| 392 | IgG exp_7   | 9711         | Ig gamma-4 chain C region | EEQFNSTYR_3_4_1_0 | 0.0                                     | 0.0              | 10.5           | 0.0              | 0.0              | 0.0               | 100.0          | 54.8             | 19.4           | 5.6              | 20.8           | 3.6              | 31.2           | 10.4             | Core                  |
| 393 | IgG exp_7   | 9698         | Ig gamma-4 chain C region | EEQFNSTYR_4_4_1_0 | 0.0                                     | 3.5              | 13.1           | 2.5              | 0.0              | 0.0               | 100.0          | 79.3             | 18.8           | 13.1             | 21.7           | 6.9              | 42.3           | 11.9             | Core                  |

**Supplementary Table 3.** Glycopeptide spectrum matches of human plasma proteins and their relative intensities as unknown set for machine learning.

| No. | Experiments        | CID Scan No. | N-glycoproteins             | N-glycopeptides       | Relative intensities of B/Y series ions |                  |                |                  |                  |                   |                |                  |                |                  |                |                  |                |                  |
|-----|--------------------|--------------|-----------------------------|-----------------------|-----------------------------------------|------------------|----------------|------------------|------------------|-------------------|----------------|------------------|----------------|------------------|----------------|------------------|----------------|------------------|
|     |                    |              |                             |                       | B <sub>2</sub>                          | B <sub>2</sub> F | B <sub>3</sub> | B <sub>3</sub> F | B <sub>2</sub> S | B <sub>2</sub> SF | Y <sub>1</sub> | Y <sub>1</sub> F | Y <sub>2</sub> | Y <sub>2</sub> F | Y <sub>3</sub> | Y <sub>3</sub> F | Y <sub>4</sub> | Y <sub>4</sub> F |
| 1   | Human Plasma exp_1 | 18962        | Afamin                      | DIENFNSTQK_5_4_0_2    | 100.0                                   | 0.0              | 8.1            | 0.0              | 94.0             | 0.0               | 28.3           | 0.0              | 0.0            | 0.0              | 6.7            | 0.0              | 30.9           | 0.0              |
| 2   | Human Plasma exp_1 | 18960        | Afamin                      | DIENFNSTQK_5_4_0_2    | 21.7                                    | 0.0              | 5.4            | 0.0              | 100.0            | 0.0               | 89.0           | 0.0              | 4.4            | 0.0              | 7.7            | 0.0              | 44.1           | 0.0              |
| 3   | Human Plasma exp_1 | 18914        | Afamin                      | DIENFNSTQK_5_4_0_2    | 0.0                                     | 0.0              | 0.0            | 0.0              | 17.3             | 0.0               | 100.0          | 0.0              | 3.2            | 0.0              | 3.0            | 0.0              | 11.3           | 0.0              |
| 4   | Human Plasma exp_2 | 19315        | Afamin                      | DIENFNSTQK_5_4_0_2    | 87.5                                    | 0.0              | 6.2            | 0.0              | 100.0            | 0.0               | 30.0           | 0.0              | 0.0            | 0.0              | 11.9           | 0.0              | 41.6           | 0.0              |
| 5   | Human Plasma exp_2 | 19360        | Afamin                      | DIENFNSTQK_5_4_0_2    | 40.2                                    | 0.0              | 5.4            | 0.0              | 100.0            | 0.0               | 91.4           | 0.0              | 4.9            | 0.0              | 7.0            | 0.0              | 47.4           | 0.0              |
| 6   | Human Plasma exp_2 | 19306        | Afamin                      | DIENFNSTQK_5_4_0_2    | 0.0                                     | 0.0              | 2.1            | 0.0              | 16.8             | 0.0               | 100.0          | 0.0              | 9.4            | 0.0              | 10.5           | 0.0              | 11.3           | 0.0              |
| 7   | Human Plasma exp_3 | 18842        | Afamin                      | DIENFNSTQK_5_4_0_2    | 81.0                                    | 0.0              | 8.2            | 0.0              | 100.0            | 0.0               | 52.0           | 0.0              | 5.1            | 0.0              | 7.7            | 0.0              | 42.5           | 0.0              |
| 8   | Human Plasma exp_4 | 19406        | Afamin                      | DIENFNSTQK_5_4_0_2    | 84.4                                    | 0.0              | 14.0           | 0.0              | 100.0            | 0.0               | 42.0           | 0.0              | 4.4            | 0.0              | 11.5           | 0.0              | 45.1           | 0.0              |
| 9   | Human Plasma exp_4 | 19448        | Afamin                      | DIENFNSTQK_5_4_0_2    | 36.2                                    | 0.0              | 5.4            | 0.0              | 86.4             | 0.0               | 100.0          | 0.0              | 4.2            | 0.0              | 6.0            | 0.0              | 40.2           | 0.0              |
| 10  | Human Plasma exp_5 | 19011        | Afamin                      | DIENFNSTQK_5_4_0_2    | 99.0                                    | 0.0              | 13.9           | 0.0              | 100.0            | 0.0               | 45.4           | 0.0              | 0.0            | 0.0              | 4.2            | 0.0              | 43.1           | 0.0              |
| 11  | Human Plasma exp_5 | 19135        | Afamin                      | DIENFNSTQK_5_4_0_2    | 40.5                                    | 0.0              | 4.1            | 0.0              | 100.0            | 0.0               | 58.1           | 0.0              | 0.0            | 0.0              | 0.0            | 0.0              | 32.3           | 0.0              |
| 12  | Human Plasma exp_5 | 18647        | Afamin                      | DIENFNSTQK_5_4_1_2    | 34.4                                    | 0.0              | 0.0            | 0.0              | 100.0            | 5.3               | 23.1           | 25.9             | 0.0            | 0.0              | 0.0            | 0.0              | 4.7            | 0.0              |
| 13  | Human Plasma exp_3 | 8213         | Afamin                      | FNETTEK_5_4_0_2       | 58.6                                    | 0.0              | 5.8            | 0.0              | 100.0            | 0.0               | 43.6           | 0.0              | 0.0            | 0.0              | 11.1           | 0.0              | 32.7           | 0.0              |
| 14  | Human Plasma exp_5 | 7958         | Afamin                      | FNETTEK_5_4_0_2       | 44.5                                    | 0.0              | 7.1            | 0.0              | 100.0            | 0.0               | 12.8           | 0.0              | 0.0            | 0.0              | 0.0            | 0.0              | 26.2           | 0.0              |
| 15  | Human Plasma exp_5 | 12730        | Afamin                      | FNETTEK_6_5_0_3       | 11.4                                    | 0.0              | 0.0            | 0.0              | 100.0            | 0.0               | 35.1           | 0.0              | 2.7            | 0.0              | 0.0            | 0.0              | 43.1           | 0.0              |
| 16  | Human Plasma exp_1 | 1509         | Afamin                      | HNFSHCCSK_5_4_0_2     | 100.0                                   | 0.0              | 0.0            | 0.0              | 88.8             | 0.0               | 20.8           | 0.0              | 0.0            | 0.0              | 13.4           | 0.0              | 75.9           | 0.0              |
| 17  | Human Plasma exp_2 | 1548         | Afamin                      | HNFSHCCSK_5_4_0_2     | 100.0                                   | 0.0              | 0.0            | 0.0              | 87.0             | 0.0               | 19.5           | 0.0              | 0.0            | 0.0              | 11.9           | 0.0              | 73.1           | 0.0              |
| 18  | Human Plasma exp_4 | 1590         | Afamin                      | HNFSHCCSK_5_4_0_2     | 100.0                                   | 0.0              | 0.0            | 0.0              | 87.0             | 0.0               | 81.9           | 0.0              | 21.6           | 0.0              | 0.0            | 0.0              | 50.3           | 0.0              |
| 19  | Human Plasma exp_5 | 1488         | Afamin                      | HNFSHCCSK_5_4_0_2     | 100.0                                   | 0.0              | 0.0            | 0.0              | 83.1             | 0.0               | 19.7           | 0.0              | 0.0            | 0.0              | 12.9           | 0.0              | 76.4           | 0.0              |
| 20  | Human Plasma exp_5 | 1492         | Afamin                      | HNFSHCCSK_5_4_0_2     | 98.8                                    | 0.0              | 0.0            | 0.0              | 85.4             | 0.0               | 100.0          | 0.0              | 23.4           | 0.0              | 0.0            | 0.0              | 58.4           | 0.0              |
| 21  | Human Plasma exp_1 | 13729        | Afamin                      | NCCNTENPPGCYR_5_4_0_2 | 63.5                                    | 0.0              | 0.0            | 0.0              | 100.0            | 0.0               | 71.8           | 0.0              | 10.8           | 0.0              | 16.6           | 0.0              | 68.0           | 0.0              |
| 22  | Human Plasma exp_1 | 13720        | Afamin                      | NCCNTENPPGCYR_5_4_0_2 | 13.8                                    | 0.0              | 0.0            | 0.0              | 97.4             | 0.0               | 100.0          | 0.0              | 0.0            | 0.0              | 9.0            | 0.0              | 21.8           | 0.0              |
| 23  | Human Plasma exp_4 | 13975        | Afamin                      | NCCNTENPPGCYR_5_4_0_2 | 64.6                                    | 0.0              | 6.9            | 0.0              | 100.0            | 0.0               | 73.9           | 0.0              | 10.3           | 0.0              | 20.2           | 0.0              | 77.1           | 0.0              |
| 24  | Human Plasma exp_4 | 13811        | Afamin                      | NCCNTENPPGCYR_5_4_0_2 | 16.2                                    | 0.0              | 5.3            | 0.0              | 100.0            | 0.0               | 88.3           | 0.0              | 0.0            | 0.0              | 7.3            | 0.0              | 20.8           | 0.0              |
| 25  | Human Plasma exp_1 | 5154         | Alpha-1-acid glycoprotein 1 | ENGTISR_5_4_0_2       | 50.2                                    | 0.0              | 4.1            | 0.0              | 100.0            | 0.0               | 32.2           | 0.0              | 0.0            | 0.0              | 0.0            | 0.0              | 28.6           | 0.0              |
| 26  | Human Plasma exp_2 | 5244         | Alpha-1-acid glycoprotein 1 | ENGTISR_5_4_0_2       | 59.3                                    | 0.0              | 3.6            | 0.0              | 100.0            | 0.0               | 46.0           | 0.0              | 0.0            | 0.0              | 0.0            | 0.0              | 38.8           | 0.0              |

**Supplementary Table 3. Continued.**

| No. | Experiments        | CID Scan No. | N-glycoproteins             | N-glycopeptides           | Relative intensities of B/Y series ions |                  |                |                  |                  |                   |                |                  |                |                  |                |                  |                |                  |
|-----|--------------------|--------------|-----------------------------|---------------------------|-----------------------------------------|------------------|----------------|------------------|------------------|-------------------|----------------|------------------|----------------|------------------|----------------|------------------|----------------|------------------|
|     |                    |              |                             |                           | B <sub>2</sub>                          | B <sub>2</sub> F | B <sub>3</sub> | B <sub>3</sub> F | B <sub>2</sub> S | B <sub>2</sub> SF | Y <sub>1</sub> | Y <sub>1</sub> F | Y <sub>2</sub> | Y <sub>2</sub> F | Y <sub>3</sub> | Y <sub>3</sub> F | Y <sub>4</sub> | Y <sub>4</sub> F |
| 27  | Human Plasma exp_3 | 5199         | Alpha-1-acid glycoprotein 1 | ENGTISR_5_4_0_2           | 56.5                                    | 0.0              | 6.6            | 0.0              | 100.0            | 0.0               | 30.8           | 0.0              | 3.9            | 0.0              | 0.0            | 0.0              | 33.0           | 0.0              |
| 28  | Human Plasma exp_4 | 5332         | Alpha-1-acid glycoprotein 1 | ENGTISR_5_4_0_2           | 54.7                                    | 0.0              | 7.7            | 0.0              | 100.0            | 0.0               | 38.8           | 0.0              | 0.0            | 0.0              | 0.0            | 0.0              | 34.8           | 0.0              |
| 29  | Human Plasma exp_5 | 5195         | Alpha-1-acid glycoprotein 1 | ENGTISR_5_4_0_2           | 55.8                                    | 0.0              | 5.9            | 0.0              | 100.0            | 0.0               | 48.8           | 0.0              | 0.0            | 0.0              | 0.0            | 0.0              | 35.7           | 0.0              |
| 30  | Human Plasma exp_1 | 5094         | Alpha-1-acid glycoprotein 1 | ENGTISR_5_4_1_2           | 79.5                                    | 0.0              | 4.9            | 0.0              | 100.0            | 23.5              | 35.8           | 0.0              | 0.0            | 0.0              | 0.0            | 0.0              | 29.9           | 0.0              |
| 31  | Human Plasma exp_2 | 5202         | Alpha-1-acid glycoprotein 1 | ENGTISR_5_4_1_2           | 64.0                                    | 9.5              | 0.0            | 0.0              | 100.0            | 20.0              | 20.6           | 0.0              | 0.0            | 0.0              | 0.0            | 0.0              | 18.1           | 0.0              |
| 32  | Human Plasma exp_5 | 5163         | Alpha-1-acid glycoprotein 1 | ENGTISR_5_4_1_2           | 54.6                                    | 0.0              | 0.0            | 0.0              | 100.0            | 11.3              | 12.1           | 0.0              | 0.0            | 0.0              | 0.0            | 0.0              | 11.4           | 0.0              |
| 33  | Human Plasma exp_2 | 9286         | Alpha-1-acid glycoprotein 1 | ENGTISR_6_5_0_3           | 43.3                                    | 0.0              | 0.0            | 0.0              | 100.0            | 0.0               | 5.8            | 0.0              | 0.0            | 0.0              | 1.8            | 0.0              | 1.5            | 0.0              |
| 34  | Human Plasma exp_3 | 9084         | Alpha-1-acid glycoprotein 1 | ENGTISR_6_5_0_3           | 26.2                                    | 0.0              | 0.0            | 0.0              | 100.0            | 0.0               | 52.1           | 0.0              | 4.6            | 0.0              | 0.0            | 0.0              | 24.8           | 0.0              |
| 35  | Human Plasma exp_4 | 9253         | Alpha-1-acid glycoprotein 1 | ENGTISR_6_5_0_3           | 50.9                                    | 0.0              | 3.9            | 0.0              | 100.0            | 0.0               | 8.4            | 0.0              | 0.0            | 0.0              | 0.0            | 0.0              | 10.2           | 0.0              |
| 36  | Human Plasma exp_1 | 9587         | Alpha-1-acid glycoprotein 1 | ENGTISR_6_5_1_3           | 17.7                                    | 0.0              | 0.0            | 0.0              | 100.0            | 54.8              | 49.5           | 0.0              | 0.0            | 0.0              | 0.0            | 0.0              | 8.7            | 0.0              |
| 37  | Human Plasma exp_2 | 8919         | Alpha-1-acid glycoprotein 1 | ENGTISR_6_5_1_3           | 68.4                                    | 4.6              | 0.0            | 0.0              | 100.0            | 18.9              | 17.4           | 0.0              | 0.0            | 0.0              | 0.0            | 0.0              | 0.0            | 0.0              |
| 38  | Human Plasma exp_3 | 8894         | Alpha-1-acid glycoprotein 1 | ENGTISR_6_5_1_3           | 64.4                                    | 7.8              | 0.0            | 0.0              | 100.0            | 23.1              | 22.1           | 0.0              | 0.0            | 0.0              | 0.0            | 0.0              | 3.5            | 0.0              |
| 39  | Human Plasma exp_3 | 9871         | Alpha-1-acid glycoprotein 1 | ENGTISR_6_5_1_3           | 9.9                                     | 0.0              | 0.0            | 0.0              | 100.0            | 22.3              | 23.8           | 3.6              | 0.0            | 0.0              | 0.0            | 0.0              | 17.8           | 0.0              |
| 40  | Human Plasma exp_4 | 8976         | Alpha-1-acid glycoprotein 1 | ENGTISR_6_5_1_3           | 74.9                                    | 8.0              | 0.0            | 0.0              | 100.0            | 23.5              | 20.4           | 0.0              | 0.0            | 0.0              | 0.0            | 0.0              | 0.0            | 0.0              |
| 41  | Human Plasma exp_4 | 9141         | Alpha-1-acid glycoprotein 1 | ENGTISR_6_5_1_3           | 21.5                                    | 4.3              | 0.0            | 0.0              | 100.0            | 34.0              | 84.5           | 0.0              | 6.1            | 0.0              | 0.0            | 0.0              | 49.7           | 0.0              |
| 42  | Human Plasma exp_5 | 8869         | Alpha-1-acid glycoprotein 1 | ENGTISR_6_5_1_3           | 59.2                                    | 4.0              | 0.0            | 0.0              | 100.0            | 22.2              | 13.3           | 0.0              | 0.0            | 0.0              | 0.0            | 0.0              | 0.0            | 0.0              |
| 43  | Human Plasma exp_5 | 9219         | Alpha-1-acid glycoprotein 1 | ENGTISR_6_5_1_3           | 14.6                                    | 0.0              | 0.0            | 0.0              | 100.0            | 41.5              | 38.1           | 0.0              | 0.0            | 0.0              | 0.0            | 0.0              | 21.1           | 0.0              |
| 44  | Human Plasma exp_3 | 14454        | Alpha-1-acid glycoprotein 1 | ENGTISR_7_6_1_4           | 24.0                                    | 0.0              | 0.0            | 0.0              | 100.0            | 30.3              | 7.2            | 1.9              | 0.0            | 0.0              | 0.0            | 0.0              | 1.1            | 0.0              |
| 45  | Human Plasma exp_4 | 13885        | Alpha-1-acid glycoprotein 1 | ENGTISR_7_6_1_4           | 38.7                                    | 5.1              | 0.0            | 0.0              | 100.0            | 37.9              | 5.6            | 0.0              | 0.0            | 0.0              | 0.0            | 0.0              | 0.0            | 0.0              |
| 46  | Human Plasma exp_5 | 14875        | Alpha-1-acid glycoprotein 1 | ENGTISR_7_6_1_4           | 23.9                                    | 4.8              | 0.0            | 0.0              | 100.0            | 32.8              | 8.7            | 0.0              | 0.0            | 0.0              | 0.0            | 0.0              | 4.1            | 0.0              |
| 47  | Human Plasma exp_2 | 13822        | Alpha-1-acid glycoprotein 1 | ENGTISR_7_6_2_4           | 27.0                                    | 9.4              | 0.0            | 0.0              | 76.5             | 100.0             | 13.9           | 0.0              | 0.0            | 0.0              | 0.0            | 0.0              | 0.0            | 0.0              |
| 48  | Human Plasma exp_3 | 14493        | Alpha-1-acid glycoprotein 1 | ENGTISR_7_6_2_4           | 17.9                                    | 3.6              | 0.0            | 0.0              | 100.0            | 90.6              | 10.9           | 0.0              | 0.0            | 0.0              | 0.0            | 0.0              | 0.0            | 0.0              |
| 49  | Human Plasma exp_4 | 14741        | Alpha-1-acid glycoprotein 1 | ENGTISR_7_6_2_4           | 22.4                                    | 6.3              | 0.0            | 0.0              | 100.0            | 85.5              | 12.7           | 0.0              | 0.0            | 0.0              | 0.0            | 0.0              | 2.7            | 0.0              |
| 50  | Human Plasma exp_5 | 13807        | Alpha-1-acid glycoprotein 1 | ENGTISR_7_6_2_4           | 19.3                                    | 7.2              | 0.0            | 0.0              | 83.0             | 100.0             | 12.5           | 0.0              | 0.0            | 0.0              | 0.0            | 0.0              | 2.2            | 0.0              |
| 51  | Human Plasma exp_5 | 14153        | Alpha-1-acid glycoprotein 1 | ENGTISR_7_6_3_4           | 17.7                                    | 5.1              | 0.0            | 0.0              | 76.7             | 100.0             | 2.5            | 0.0              | 0.0            | 0.0              | 0.0            | 0.0              | 0.0            | 0.0              |
| 52  | Human Plasma exp_2 | 30047        | Alpha-1-acid glycoprotein 1 | LVPVPITNATLDQITGK_5_4_0_1 | 100.0                                   | 0.0              | 0.0            | 0.0              | 43.9             | 0.0               | 31.4           | 0.0              | 0.0            | 0.0              | 7.4            | 0.0              | 62.2           | 0.0              |

Supplementary Table 3. Continued.

| No. | Experiments        | CID Scan No. | N-glycoproteins               | N-glycopeptides           | Relative intensities of B/Y series ions |                  |                |                  |                  |                   |                |                  |                |                  |                |                  |                |                  |
|-----|--------------------|--------------|-------------------------------|---------------------------|-----------------------------------------|------------------|----------------|------------------|------------------|-------------------|----------------|------------------|----------------|------------------|----------------|------------------|----------------|------------------|
|     |                    |              |                               |                           | B <sub>2</sub>                          | B <sub>2</sub> F | B <sub>3</sub> | B <sub>3</sub> F | B <sub>2</sub> S | B <sub>2</sub> SF | Y <sub>1</sub> | Y <sub>1</sub> F | Y <sub>2</sub> | Y <sub>2</sub> F | Y <sub>3</sub> | Y <sub>3</sub> F | Y <sub>4</sub> | Y <sub>4</sub> F |
| 53  | Human Plasma exp_3 | 29500        | Alpha-1-acid glycoprotein 1   | LVPVPITNATLDQITGK_5_4_0_1 | 100.0                                   | 0.0              | 0.0            | 0.0              | 46.4             | 0.0               | 53.3           | 0.0              | 0.0            | 0.0              | 35.8           | 0.0              | 79.3           | 0.0              |
| 54  | Human Plasma exp_4 | 29784        | Alpha-1-acid glycoprotein 1   | LVPVPITNATLDQITGK_5_4_0_1 | 100.0                                   | 0.0              | 6.8            | 0.0              | 46.4             | 0.0               | 26.5           | 0.0              | 0.0            | 0.0              | 0.0            | 0.0              | 51.1           | 0.0              |
| 55  | Human Plasma exp_4 | 31478        | Alpha-1-acid glycoprotein 1   | LVPVPITNATLDQITGK_5_4_0_2 | 67.1                                    | 0.0              | 4.6            | 0.0              | 100.0            | 0.0               | 0.0            | 0.0              | 2.2            | 0.0              | 7.9            | 0.0              | 85.0           | 0.0              |
| 56  | Human Plasma exp_1 | 32456        | Alpha-1-acid glycoprotein 1   | LVPVPITNATLDQITGK_6_5_0_3 | 31.4                                    | 0.0              | 0.0            | 0.0              | 100.0            | 0.0               | 32.1           | 0.0              | 2.6            | 0.0              | 0.0            | 0.0              | 31.4           | 0.0              |
| 57  | Human Plasma exp_4 | 33045        | Alpha-1-acid glycoprotein 1   | LVPVPITNATLDQITGK_6_5_0_3 | 30.6                                    | 0.0              | 0.0            | 0.0              | 100.0            | 0.0               | 34.6           | 0.0              | 6.1            | 0.0              | 5.7            | 0.0              | 33.1           | 0.0              |
| 58  | Human Plasma exp_1 | 30786        | Alpha-1-acid glycoprotein 1   | LVPVPITNATLDQITGK_6_5_1_2 | 70.5                                    | 0.0              | 0.0            | 0.0              | 100.0            | 46.4              | 39.2           | 0.0              | 0.0            | 0.0              | 6.7            | 0.0              | 51.2           | 0.0              |
| 59  | Human Plasma exp_4 | 31353        | Alpha-1-acid glycoprotein 1   | LVPVPITNATLDQITGK_6_5_1_2 | 80.1                                    | 8.3              | 0.0            | 0.0              | 100.0            | 37.5              | 60.1           | 0.0              | 0.0            | 0.0              | 10.2           | 0.0              | 0.0            | 0.0              |
| 60  | Human Plasma exp_4 | 32977        | Alpha-1-acid glycoprotein 1   | LVPVPITNATLDQITGK_6_5_1_3 | 32.6                                    | 3.6              | 0.0            | 0.0              | 100.0            | 31.0              | 47.1           | 0.0              | 2.3            | 0.0              | 0.0            | 0.0              | 37.5           | 0.0              |
| 61  | Human Plasma exp_2 | 27598        | Alpha-1-acid glycoprotein 1   | QDQCIYNTTYLNVQR_5_4_0_2   | 73.6                                    | 0.0              | 8.1            | 0.0              | 99.8             | 0.0               | 100.0          | 0.0              | 0.0            | 0.0              | 0.0            | 0.0              | 41.7           | 0.0              |
| 62  | Human Plasma exp_3 | 27020        | Alpha-1-acid glycoprotein 1   | QDQCIYNTTYLNVQR_5_4_0_2   | 61.5                                    | 0.0              | 0.0            | 0.0              | 100.0            | 0.0               | 74.6           | 0.0              | 4.7            | 0.0              | 0.0            | 0.0              | 59.9           | 0.0              |
| 63  | Human Plasma exp_1 | 29130        | Alpha-1-acid glycoprotein 1   | QDQCIYNTTYLNVQR_6_5_0_3   | 30.3                                    | 0.0              | 0.0            | 0.0              | 100.0            | 0.0               | 68.7           | 0.0              | 0.0            | 0.0              | 9.5            | 0.0              | 40.4           | 0.0              |
| 64  | Human Plasma exp_2 | 29848        | Alpha-1-acid glycoprotein 1   | QDQCIYNTTYLNVQR_6_5_0_3   | 31.2                                    | 0.0              | 0.0            | 0.0              | 100.0            | 0.0               | 76.0           | 0.0              | 0.0            | 0.0              | 5.3            | 0.0              | 25.2           | 0.0              |
| 65  | Human Plasma exp_4 | 29531        | Alpha-1-acid glycoprotein 1   | QDQCIYNTTYLNVQR_6_5_1_3   | 17.9                                    | 0.0              | 0.0            | 0.0              | 100.0            | 18.6              | 75.4           | 0.0              | 3.2            | 0.0              | 0.0            | 0.0              | 42.1           | 0.0              |
| 66  | Human Plasma exp_1 | 4603         | Alpha-1-acid glycoprotein 1,2 | NEEYNK_5_4_0_2            | 52.2                                    | 0.0              | 5.7            | 0.0              | 100.0            | 0.0               | 0.0            | 0.0              | 4.0            | 0.0              | 7.4            | 0.0              | 38.2           | 0.0              |
| 67  | Human Plasma exp_2 | 4672         | Alpha-1-acid glycoprotein 1,2 | NEEYNK_5_4_0_2            | 49.3                                    | 0.0              | 5.0            | 0.0              | 100.0            | 0.0               | 0.0            | 0.0              | 2.4            | 0.0              | 5.8            | 0.0              | 39.0           | 0.0              |
| 68  | Human Plasma exp_3 | 4633         | Alpha-1-acid glycoprotein 1,2 | NEEYNK_5_4_0_2            | 27.4                                    | 0.0              | 5.1            | 0.0              | 100.0            | 0.0               | 0.0            | 0.0              | 3.9            | 0.0              | 7.3            | 0.0              | 40.4           | 0.0              |
| 69  | Human Plasma exp_4 | 4752         | Alpha-1-acid glycoprotein 1,2 | NEEYNK_5_4_0_2            | 49.3                                    | 0.0              | 4.8            | 0.0              | 100.0            | 0.0               | 0.0            | 0.0              | 3.2            | 0.0              | 6.6            | 0.0              | 36.7           | 0.0              |
| 70  | Human Plasma exp_5 | 4319         | Alpha-1-acid glycoprotein 1,2 | NEEYNK_5_4_0_2            | 0.0                                     | 0.0              | 3.7            | 0.0              | 43.1             | 0.0               | 100.0          | 0.0              | 20.9           | 0.0              | 13.2           | 0.0              | 30.9           | 0.0              |
| 71  | Human Plasma exp_1 | 4396         | Alpha-1-acid glycoprotein 1,2 | NEEYNK_5_4_1_2            | 56.3                                    | 0.0              | 0.0            | 0.0              | 100.0            | 0.0               | 10.5           | 37.7             | 0.0            | 0.0              | 0.0            | 0.0              | 6.8            | 29.4             |
| 72  | Human Plasma exp_2 | 4457         | Alpha-1-acid glycoprotein 1,2 | NEEYNK_5_4_1_2            | 51.3                                    | 0.0              | 0.0            | 0.0              | 100.0            | 0.0               | 9.5            | 38.5             | 0.0            | 0.0              | 0.0            | 0.0              | 5.6            | 27.0             |
| 73  | Human Plasma exp_3 | 4410         | Alpha-1-acid glycoprotein 1,2 | NEEYNK_5_4_1_2            | 49.9                                    | 0.0              | 4.3            | 0.0              | 100.0            | 4.6               | 15.0           | 33.8             | 0.0            | 0.0              | 0.0            | 0.0              | 9.6            | 28.3             |
| 74  | Human Plasma exp_4 | 4528         | Alpha-1-acid glycoprotein 1,2 | NEEYNK_5_4_1_2            | 28.6                                    | 0.0              | 6.0            | 0.0              | 100.0            | 0.0               | 15.5           | 36.9             | 0.0            | 0.0              | 0.0            | 0.0              | 9.3            | 27.6             |
| 75  | Human Plasma exp_5 | 4414         | Alpha-1-acid glycoprotein 1,2 | NEEYNK_5_4_1_2            | 51.6                                    | 0.0              | 5.7            | 0.0              | 100.0            | 6.1               | 14.5           | 34.5             | 0.0            | 0.0              | 0.0            | 0.0              | 8.1            | 26.9             |
| 76  | Human Plasma exp_2 | 4828         | Alpha-1-acid glycoprotein 1,2 | NEEYNK_6_5_0_2            | 68.4                                    | 0.0              | 0.0            | 0.0              | 100.0            | 0.0               | 81.9           | 0.0              | 0.0            | 0.0              | 2.7            | 0.0              | 13.1           | 0.0              |
| 77  | Human Plasma exp_4 | 4472         | Alpha-1-acid glycoprotein 1,2 | NEEYNK_6_5_0_2            | 74.8                                    | 0.0              | 6.9            | 0.0              | 100.0            | 0.0               | 84.0           | 0.0              | 2.7            | 0.0              | 6.7            | 0.0              | 37.9           | 0.0              |
| 78  | Human Plasma exp_1 | 8272         | Alpha-1-acid glycoprotein 1,2 | NEEYNK_6_5_0_3            | 21.5                                    | 0.0              | 0.0            | 0.0              | 100.0            | 0.0               | 55.7           | 0.0              | 2.4            | 0.0              | 3.9            | 0.0              | 20.7           | 0.0              |

**Supplementary Table 3. Continued.**

| No. | Experiments        | CID Scan No. | N-glycoproteins               | N-glycopeptides | Relative intensities of B/Y series ions |                  |                |                  |                  |                   |                |                  |                |                  |                |                  |                |                  |
|-----|--------------------|--------------|-------------------------------|-----------------|-----------------------------------------|------------------|----------------|------------------|------------------|-------------------|----------------|------------------|----------------|------------------|----------------|------------------|----------------|------------------|
|     |                    |              |                               |                 | B <sub>2</sub>                          | B <sub>2</sub> F | B <sub>3</sub> | B <sub>3</sub> F | B <sub>2</sub> S | B <sub>2</sub> SF | Y <sub>1</sub> | Y <sub>1</sub> F | Y <sub>2</sub> | Y <sub>2</sub> F | Y <sub>3</sub> | Y <sub>3</sub> F | Y <sub>4</sub> | Y <sub>4</sub> F |
| 79  | Human Plasma exp_3 | 7818         | Alpha-1-acid glycoprotein 1,2 | NEEYNK_6_5_0_3  | 18.7                                    | 0.0              | 0.0            | 0.0              | 100.0            | 0.0               | 30.9           | 0.0              | 0.0            | 0.0              | 2.8            | 0.0              | 10.4           | 0.0              |
| 80  | Human Plasma exp_2 | 4012         | Alpha-1-acid glycoprotein 1,2 | NEEYNK_6_5_1_2  | 54.7                                    | 14.2             | 0.0            | 0.0              | 100.0            | 0.0               | 44.7           | 0.0              | 4.1            | 0.0              | 0.0            | 0.0              | 11.1           | 0.0              |
| 81  | Human Plasma exp_4 | 4103         | Alpha-1-acid glycoprotein 1,2 | NEEYNK_6_5_1_2  | 44.0                                    | 10.6             | 0.0            | 0.0              | 100.0            | 10.0              | 43.2           | 0.0              | 0.0            | 0.0              | 0.0            | 0.0              | 21.8           | 0.0              |
| 82  | Human Plasma exp_5 | 3982         | Alpha-1-acid glycoprotein 1,2 | NEEYNK_6_5_1_2  | 40.7                                    | 14.5             | 0.0            | 0.0              | 100.0            | 0.0               | 50.2           | 0.0              | 0.0            | 0.0              | 0.0            | 0.0              | 12.7           | 0.0              |
| 83  | Human Plasma exp_1 | 7468         | Alpha-1-acid glycoprotein 1,2 | NEEYNK_6_5_1_3  | 7.9                                     | 6.6              | 0.0            | 0.0              | 100.0            | 25.5              | 81.1           | 0.0              | 0.0            | 0.0              | 0.0            | 0.0              | 19.8           | 0.0              |
| 84  | Human Plasma exp_2 | 7865         | Alpha-1-acid glycoprotein 1,2 | NEEYNK_6_5_1_3  | 54.9                                    | 5.9              | 0.0            | 0.0              | 100.0            | 13.8              | 14.1           | 0.0              | 0.0            | 0.0              | 0.0            | 0.0              | 1.8            | 0.0              |
| 85  | Human Plasma exp_2 | 7608         | Alpha-1-acid glycoprotein 1,2 | NEEYNK_6_5_1_3  | 12.1                                    | 0.0              | 0.0            | 0.0              | 100.0            | 45.9              | 71.4           | 0.0              | 0.0            | 0.0              | 0.0            | 0.0              | 25.8           | 0.0              |
| 86  | Human Plasma exp_3 | 8517         | Alpha-1-acid glycoprotein 1,2 | NEEYNK_6_5_1_3  | 23.1                                    | 0.0              | 0.0            | 0.0              | 100.0            | 35.6              | 59.1           | 0.0              | 0.0            | 0.0              | 0.0            | 0.0              | 26.1           | 0.0              |
| 87  | Human Plasma exp_4 | 7652         | Alpha-1-acid glycoprotein 1,2 | NEEYNK_6_5_1_3  | 22.2                                    | 0.0              | 0.0            | 0.0              | 100.0            | 32.9              | 83.5           | 0.0              | 0.0            | 0.0              | 0.0            | 0.0              | 27.4           | 0.0              |
| 88  | Human Plasma exp_5 | 7660         | Alpha-1-acid glycoprotein 1,2 | NEEYNK_6_5_1_3  | 55.2                                    | 5.8              | 0.0            | 0.0              | 100.0            | 12.3              | 27.6           | 0.0              | 0.0            | 0.0              | 0.0            | 0.0              | 5.2            | 0.0              |
| 89  | Human Plasma exp_5 | 7574         | Alpha-1-acid glycoprotein 1,2 | NEEYNK_6_5_1_3  | 10.8                                    | 10.2             | 0.0            | 0.0              | 100.0            | 46.4              | 91.1           | 0.0              | 0.0            | 0.0              | 0.0            | 0.0              | 26.4           | 0.0              |
| 90  | Human Plasma exp_1 | 7814         | Alpha-1-acid glycoprotein 1,2 | NEEYNK_6_5_2_3  | 0.0                                     | 5.9              | 0.0            | 0.0              | 100.0            | 22.1              | 8.8            | 20.7             | 0.0            | 0.0              | 0.0            | 0.0              | 11.6           | 13.9             |
| 91  | Human Plasma exp_2 | 7938         | Alpha-1-acid glycoprotein 1,2 | NEEYNK_6_5_2_3  | 0.0                                     | 0.0              | 6.0            | 0.0              | 100.0            | 39.3              | 27.8           | 31.1             | 0.0            | 0.0              | 0.0            | 0.0              | 11.8           | 18.5             |
| 92  | Human Plasma exp_4 | 7944         | Alpha-1-acid glycoprotein 1,2 | NEEYNK_6_5_2_3  | 0.0                                     | 0.0              | 0.0            | 0.0              | 100.0            | 45.2              | 42.8           | 10.2             | 0.0            | 0.0              | 0.0            | 0.0              | 21.8           | 11.2             |
| 93  | Human Plasma exp_2 | 3426         | Alpha-1-acid glycoprotein 2   | ENGTVSR_5_4_0_2 | 51.4                                    | 0.0              | 0.0            | 0.0              | 100.0            | 0.0               | 20.5           | 0.0              | 0.0            | 0.0              | 3.5            | 0.0              | 30.7           | 0.0              |
| 94  | Human Plasma exp_3 | 3353         | Alpha-1-acid glycoprotein 2   | ENGTVSR_5_4_0_2 | 42.6                                    | 0.0              | 0.0            | 0.0              | 100.0            | 0.0               | 31.8           | 0.0              | 3.3            | 0.0              | 0.0            | 0.0              | 36.9           | 0.0              |
| 95  | Human Plasma exp_4 | 3468         | Alpha-1-acid glycoprotein 2   | ENGTVSR_5_4_0_2 | 59.9                                    | 0.0              | 0.0            | 0.0              | 100.0            | 0.0               | 21.1           | 0.0              | 0.0            | 0.0              | 3.0            | 0.0              | 27.0           | 0.0              |
| 96  | Human Plasma exp_1 | 3108         | Alpha-1-acid glycoprotein 2   | ENGTVSR_6_5_0_2 | 66.9                                    | 0.0              | 0.0            | 0.0              | 100.0            | 0.0               | 47.3           | 0.0              | 0.0            | 0.0              | 10.0           | 0.0              | 7.8            | 0.0              |
| 97  | Human Plasma exp_4 | 3240         | Alpha-1-acid glycoprotein 2   | ENGTVSR_6_5_0_2 | 85.9                                    | 0.0              | 0.0            | 0.0              | 100.0            | 0.0               | 56.8           | 0.0              | 0.0            | 0.0              | 4.0            | 0.0              | 6.3            | 0.0              |
| 98  | Human Plasma exp_1 | 6030         | Alpha-1-acid glycoprotein 2   | ENGTVSR_6_5_0_3 | 23.2                                    | 0.0              | 0.0            | 0.0              | 100.0            | 0.0               | 32.9           | 0.0              | 0.0            | 0.0              | 2.3            | 0.0              | 32.0           | 0.0              |
| 99  | Human Plasma exp_4 | 6123         | Alpha-1-acid glycoprotein 2   | ENGTVSR_6_5_0_3 | 29.4                                    | 0.0              | 0.0            | 0.0              | 100.0            | 0.0               | 31.0           | 0.0              | 0.0            | 0.0              | 4.1            | 0.0              | 23.7           | 0.0              |
| 100 | Human Plasma exp_1 | 6005         | Alpha-1-acid glycoprotein 2   | ENGTVSR_6_5_1_3 | 17.2                                    | 5.6              | 3.7            | 0.0              | 100.0            | 34.2              | 81.4           | 0.0              | 5.1            | 0.0              | 10.1           | 0.0              | 57.2           | 0.0              |
| 101 | Human Plasma exp_2 | 6119         | Alpha-1-acid glycoprotein 2   | ENGTVSR_6_5_1_3 | 19.1                                    | 4.7              | 3.5            | 0.0              | 84.4             | 35.2              | 100.0          | 0.0              | 4.4            | 0.0              | 0.0            | 0.0              | 53.5           | 0.0              |
| 102 | Human Plasma exp_3 | 6041         | Alpha-1-acid glycoprotein 2   | ENGTVSR_6_5_1_3 | 68.0                                    | 4.2              | 0.0            | 0.0              | 100.0            | 17.2              | 19.8           | 0.0              | 0.0            | 0.0              | 0.0            | 0.0              | 1.7            | 0.0              |
| 103 | Human Plasma exp_5 | 6036         | Alpha-1-acid glycoprotein 2   | ENGTVSR_6_5_1_3 | 76.4                                    | 5.3              | 0.0            | 0.0              | 100.0            | 23.0              | 16.0           | 0.0              | 0.0            | 0.0              | 0.0            | 0.0              | 0.0            | 0.0              |
| 104 | Human Plasma exp_5 | 6055         | Alpha-1-acid glycoprotein 2   | ENGTVSR_6_5_1_3 | 18.3                                    | 4.7              | 3.6            | 0.0              | 87.5             | 31.6              | 100.0          | 0.0              | 4.2            | 0.0              | 0.0            | 0.0              | 55.3           | 2.3              |



Supplementary Table 3. Continued.

| No. | Experiments        | CID Scan No. | N-glycoproteins             | N-glycopeptides         | Relative intensities of B/Y series ions |                  |                |                  |                  |                   |                |                  |                |                  |                |                  |                |                  |
|-----|--------------------|--------------|-----------------------------|-------------------------|-----------------------------------------|------------------|----------------|------------------|------------------|-------------------|----------------|------------------|----------------|------------------|----------------|------------------|----------------|------------------|
|     |                    |              |                             |                         | B <sub>2</sub>                          | B <sub>2</sub> F | B <sub>3</sub> | B <sub>3</sub> F | B <sub>2</sub> S | B <sub>2</sub> SF | Y <sub>1</sub> | Y <sub>1</sub> F | Y <sub>2</sub> | Y <sub>2</sub> F | Y <sub>3</sub> | Y <sub>3</sub> F | Y <sub>4</sub> | Y <sub>4</sub> F |
| 105 | Human Plasma exp_5 | 5964         | Alpha-1-acid glycoprotein 2 | ENGTVSR_6_5_2_3         | 0.0                                     | 0.0              | 0.0            | 0.0              | 100.0            | 40.9              | 29.0           | 0.0              | 0.0            | 0.0              | 0.0            | 0.0              | 9.4            | 6.9              |
| 106 | Human Plasma exp_1 | 10095        | Alpha-1-acid glycoprotein 2 | ENGTVSR_7_6_1_4         | 21.0                                    | 0.0              | 0.0            | 0.0              | 100.0            | 21.4              | 10.0           | 0.0              | 0.0            | 0.0              | 0.0            | 0.0              | 3.8            | 0.0              |
| 107 | Human Plasma exp_5 | 10345        | Alpha-1-acid glycoprotein 2 | ENGTVSR_7_6_1_4         | 25.5                                    | 0.0              | 0.0            | 0.0              | 100.0            | 31.6              | 4.1            | 0.0              | 0.0            | 0.0              | 0.0            | 0.0              | 1.4            | 0.0              |
| 108 | Human Plasma exp_2 | 10867        | Alpha-1-acid glycoprotein 2 | ENGTVSR_7_6_2_4         | 25.9                                    | 3.8              | 0.0            | 0.0              | 100.0            | 92.7              | 7.0            | 0.0              | 0.0            | 0.0              | 0.0            | 0.0              | 1.5            | 0.0              |
| 109 | Human Plasma exp_3 | 10390        | Alpha-1-acid glycoprotein 2 | ENGTVSR_7_6_2_4         | 26.5                                    | 9.5              | 0.0            | 0.0              | 100.0            | 59.7              | 5.1            | 0.0              | 0.0            | 0.0              | 0.0            | 0.0              | 0.0            | 0.0              |
| 110 | Human Plasma exp_5 | 10745        | Alpha-1-acid glycoprotein 2 | ENGTVSR_7_6_2_4         | 25.6                                    | 7.8              | 0.0            | 0.0              | 100.0            | 99.0              | 7.6            | 0.0              | 0.0            | 0.0              | 0.0            | 0.0              | 2.0            | 0.0              |
| 111 | Human Plasma exp_2 | 10369        | Alpha-1-acid glycoprotein 2 | ENGTVSR_7_6_3_4         | 27.3                                    | 7.3              | 0.0            | 0.0              | 71.0             | 100.0             | 6.3            | 0.0              | 0.0            | 0.0              | 0.0            | 0.0              | 0.0            | 0.0              |
| 112 | Human Plasma exp_3 | 10349        | Alpha-1-acid glycoprotein 2 | ENGTVSR_7_6_3_4         | 23.2                                    | 4.2              | 0.0            | 0.0              | 93.4             | 100.0             | 7.3            | 0.0              | 0.0            | 0.0              | 0.0            | 0.0              | 0.0            | 0.0              |
| 113 | Human Plasma exp_4 | 10452        | Alpha-1-acid glycoprotein 2 | ENGTVSR_7_6_3_4         | 32.2                                    | 5.5              | 0.0            | 0.0              | 91.4             | 100.0             | 7.4            | 0.0              | 0.0            | 0.0              | 0.0            | 0.0              | 0.0            | 0.0              |
| 114 | Human Plasma exp_1 | 10219        | Alpha-1-acid glycoprotein 2 | ENGTVSR_8_7_0_4         | 31.7                                    | 0.0              | 3.6            | 0.0              | 100.0            | 0.0               | 12.2           | 0.0              | 0.0            | 0.0              | 0.0            | 0.0              | 3.0            | 0.0              |
| 115 | Human Plasma exp_2 | 28637        | Alpha-1-acid glycoprotein 2 | LVPVPITNATLDR_5_4_0_2   | 81.0                                    | 0.0              | 4.8            | 0.0              | 100.0            | 0.0               | 46.7           | 0.0              | 0.0            | 0.0              | 4.2            | 0.0              | 52.9           | 0.0              |
| 116 | Human Plasma exp_3 | 28111        | Alpha-1-acid glycoprotein 2 | LVPVPITNATLDR_5_4_0_2   | 68.6                                    | 0.0              | 5.1            | 0.0              | 100.0            | 0.0               | 36.2           | 0.0              | 0.0            | 0.0              | 6.9            | 0.0              | 68.5           | 0.0              |
| 117 | Human Plasma exp_4 | 28654        | Alpha-1-acid glycoprotein 2 | LVPVPITNATLDR_5_4_0_2   | 71.9                                    | 0.0              | 6.0            | 0.0              | 100.0            | 0.0               | 15.7           | 0.0              | 0.0            | 0.0              | 10.8           | 0.0              | 57.0           | 0.0              |
| 118 | Human Plasma exp_5 | 27615        | Alpha-1-acid glycoprotein 2 | LVPVPITNATLDR_5_4_0_2   | 65.2                                    | 0.0              | 0.0            | 0.0              | 100.0            | 0.0               | 26.7           | 0.0              | 0.0            | 0.0              | 2.4            | 0.0              | 54.2           | 0.0              |
| 119 | Human Plasma exp_1 | 27586        | Alpha-1-acid glycoprotein 2 | LVPVPITNATLDR_6_5_0_2   | 79.6                                    | 0.0              | 8.5            | 0.0              | 100.0            | 0.0               | 4.7            | 0.0              | 0.0            | 0.0              | 0.0            | 0.0              | 24.0           | 0.0              |
| 120 | Human Plasma exp_3 | 27708        | Alpha-1-acid glycoprotein 2 | LVPVPITNATLDR_6_5_0_2   | 80.6                                    | 0.0              | 0.0            | 0.0              | 100.0            | 0.0               | 18.3           | 0.0              | 2.8            | 0.0              | 0.0            | 0.0              | 21.1           | 0.0              |
| 121 | Human Plasma exp_5 | 27392        | Alpha-1-acid glycoprotein 2 | LVPVPITNATLDR_6_5_0_2   | 81.0                                    | 0.0              | 0.0            | 0.0              | 100.0            | 0.0               | 19.7           | 0.0              | 5.3            | 0.0              | 0.0            | 0.0              | 24.1           | 0.0              |
| 122 | Human Plasma exp_4 | 30813        | Alpha-1-acid glycoprotein 2 | LVPVPITNATLDR_6_5_0_3   | 59.8                                    | 0.0              | 0.0            | 0.0              | 100.0            | 0.0               | 14.3           | 0.0              | 0.0            | 0.0              | 2.4            | 0.0              | 12.0           | 0.0              |
| 123 | Human Plasma exp_4 | 30545        | Alpha-1-acid glycoprotein 2 | LVPVPITNATLDR_6_5_0_3   | 41.1                                    | 0.0              | 0.0            | 0.0              | 100.0            | 0.0               | 20.0           | 0.0              | 7.2            | 0.0              | 3.8            | 0.0              | 0.0            | 0.0              |
| 124 | Human Plasma exp_2 | 30889        | Alpha-1-acid glycoprotein 2 | LVPVPITNATLDR_6_5_1_3   | 43.1                                    | 0.0              | 0.0            | 0.0              | 100.0            | 17.1              | 24.0           | 0.0              | 0.0            | 0.0              | 0.0            | 0.0              | 9.2            | 0.0              |
| 125 | Human Plasma exp_4 | 30616        | Alpha-1-acid glycoprotein 2 | LVPVPITNATLDR_6_5_1_3   | 39.6                                    | 0.0              | 0.0            | 0.0              | 100.0            | 24.5              | 26.8           | 0.0              | 0.0            | 0.0              | 0.0            | 0.0              | 28.9           | 0.0              |
| 126 | Human Plasma exp_4 | 30328        | Alpha-1-acid glycoprotein 2 | LVPVPITNATLDR_7_6_0_3   | 31.3                                    | 0.0              | 3.1            | 0.0              | 100.0            | 0.0               | 8.9            | 0.0              | 0.0            | 0.0              | 0.0            | 0.0              | 5.7            | 0.0              |
| 127 | Human Plasma exp_4 | 29256        | Alpha-1-acid glycoprotein 2 | QNQCFYNSSYLNVQR_6_5_0_3 | 25.0                                    | 0.0              | 0.0            | 0.0              | 100.0            | 0.0               | 82.7           | 0.0              | 0.0            | 0.0              | 9.8            | 0.0              | 34.7           | 0.0              |
| 128 | Human Plasma exp_5 | 28394        | Alpha-1-acid glycoprotein 2 | QNQCFYNSSYLNVQR_6_5_0_3 | 22.3                                    | 0.0              | 0.0            | 0.0              | 100.0            | 0.0               | 78.7           | 0.0              | 0.0            | 0.0              | 10.1           | 0.0              | 45.6           | 0.0              |
| 129 | Human Plasma exp_1 | 2023         | Alpha-1-antichymotrypsin    | NGTR_6_5_0_3            | 36.2                                    | 0.0              | 0.0            | 0.0              | 100.0            | 0.0               | 23.0           | 0.0              | 1.2            | 0.0              | 5.8            | 0.0              | 38.8           | 0.0              |
| 130 | Human Plasma exp_2 | 2300         | Alpha-1-antichymotrypsin    | NGTR_6_5_0_3            | 32.0                                    | 0.0              | 0.0            | 0.0              | 100.0            | 0.0               | 13.8           | 0.0              | 0.0            | 0.0              | 3.2            | 0.0              | 32.6           | 0.0              |

**Supplementary Table 3. Continued.**

| No. | Experiments        | CID Scan No. | N-glycoproteins          | N-glycopeptides           | Relative intensities of B/Y series ions |                  |                |                  |                  |                   |                |                  |                |                  |                |                  |                |                  |
|-----|--------------------|--------------|--------------------------|---------------------------|-----------------------------------------|------------------|----------------|------------------|------------------|-------------------|----------------|------------------|----------------|------------------|----------------|------------------|----------------|------------------|
|     |                    |              |                          |                           | B <sub>2</sub>                          | B <sub>2</sub> F | B <sub>3</sub> | B <sub>3</sub> F | B <sub>2</sub> S | B <sub>2</sub> SF | Y <sub>1</sub> | Y <sub>1</sub> F | Y <sub>2</sub> | Y <sub>2</sub> F | Y <sub>3</sub> | Y <sub>3</sub> F | Y <sub>4</sub> | Y <sub>4</sub> F |
| 131 | Human Plasma exp_3 | 2083         | Alpha-1-antichymotrypsin | NGTR_6_5_0_3              | 39.5                                    | 0.0              | 3.1            | 0.0              | 100.0            | 0.0               | 33.2           | 0.0              | 3.4            | 0.0              | 10.1           | 0.0              | 39.5           | 0.0              |
| 132 | Human Plasma exp_4 | 2176         | Alpha-1-antichymotrypsin | NGTR_6_5_0_3              | 38.3                                    | 0.0              | 3.4            | 0.0              | 100.0            | 0.0               | 34.2           | 0.0              | 5.3            | 0.0              | 8.8            | 0.0              | 41.9           | 0.0              |
| 133 | Human Plasma exp_5 | 2213         | Alpha-1-antichymotrypsin | NGTR_6_5_0_3              | 41.9                                    | 0.0              | 0.0            | 0.0              | 100.0            | 0.0               | 19.7           | 0.0              | 0.0            | 0.0              | 3.0            | 0.0              | 37.2           | 0.0              |
| 134 | Human Plasma exp_1 | 2172         | Alpha-1-antichymotrypsin | NGTR_6_5_1_3              | 32.9                                    | 0.0              | 0.0            | 0.0              | 100.0            | 7.0               | 2.7            | 9.8              | 0.0            | 0.0              | 0.0            | 0.0              | 3.7            | 24.7             |
| 135 | Human Plasma exp_2 | 2280         | Alpha-1-antichymotrypsin | NGTR_6_5_1_3              | 34.4                                    | 0.0              | 0.0            | 0.0              | 100.0            | 0.0               | 3.0            | 19.0             | 0.0            | 0.0              | 0.0            | 0.0              | 4.2            | 29.2             |
| 136 | Human Plasma exp_4 | 2297         | Alpha-1-antichymotrypsin | NGTR_6_5_1_3              | 35.4                                    | 0.0              | 0.0            | 0.0              | 100.0            | 0.0               | 5.6            | 13.3             | 0.0            | 0.0              | 0.0            | 0.0              | 1.6            | 25.7             |
| 137 | Human Plasma exp_1 | 32504        | Alpha-1-antitrypsin      | YLGNATAIFFLPDEGK_5_4_0_2  | 54.4                                    | 0.0              | 0.0            | 0.0              | 100.0            | 0.0               | 56.5           | 0.0              | 2.1            | 0.0              | 20.2           | 0.0              | 76.5           | 0.0              |
| 138 | Human Plasma exp_2 | 33340        | Alpha-1-antitrypsin      | YLGNATAIFFLPDEGK_5_4_0_2  | 51.8                                    | 0.0              | 4.5            | 0.0              | 100.0            | 0.0               | 46.5           | 0.0              | 2.2            | 0.0              | 5.5            | 0.0              | 65.1           | 0.0              |
| 139 | Human Plasma exp_3 | 32826        | Alpha-1-antitrypsin      | YLGNATAIFFLPDEGK_5_4_0_2  | 48.8                                    | 0.0              | 0.0            | 0.0              | 100.0            | 0.0               | 40.2           | 0.0              | 1.5            | 0.0              | 6.4            | 0.0              | 57.5           | 0.0              |
| 140 | Human Plasma exp_4 | 33074        | Alpha-1-antitrypsin      | YLGNATAIFFLPDEGK_5_4_0_2  | 69.2                                    | 0.0              | 0.0            | 0.0              | 100.0            | 0.0               | 29.4           | 0.0              | 3.8            | 0.0              | 8.1            | 0.0              | 57.5           | 0.0              |
| 141 | Human Plasma exp_5 | 32099        | Alpha-1-antitrypsin      | YLGNATAIFFLPDEGK_5_4_0_2  | 54.2                                    | 0.0              | 0.0            | 0.0              | 100.0            | 0.0               | 50.9           | 0.0              | 0.0            | 0.0              | 17.6           | 0.0              | 75.7           | 0.0              |
| 142 | Human Plasma exp_1 | 28824        | Alpha-2-HS-glycoprotein  | VCQDCPLLAPLNDTR_5_4_0_2   | 55.3                                    | 0.0              | 4.6            | 0.0              | 100.0            | 0.0               | 0.0            | 0.0              | 0.0            | 0.0              | 14.6           | 0.0              | 63.1           | 0.0              |
| 143 | Human Plasma exp_4 | 29566        | Alpha-2-HS-glycoprotein  | VCQDCPLLAPLNDTR_5_4_0_2   | 48.6                                    | 0.0              | 4.2            | 0.0              | 100.0            | 0.0               | 0.0            | 0.0              | 0.0            | 0.0              | 8.9            | 0.0              | 63.6           | 0.0              |
| 144 | Human Plasma exp_5 | 28442        | Alpha-2-HS-glycoprotein  | VCQDCPLLAPLNDTR_5_4_0_2   | 55.9                                    | 0.0              | 4.7            | 0.0              | 100.0            | 0.0               | 0.0            | 0.0              | 5.0            | 0.0              | 18.5           | 0.0              | 75.3           | 0.0              |
| 145 | Human Plasma exp_5 | 28352        | Alpha-2-HS-glycoprotein  | VCQDCPLLAPLNDTR_5_4_1_2   | 34.0                                    | 0.0              | 0.0            | 0.0              | 100.0            | 6.9               | 60.2           | 10.8             | 0.0            | 0.0              | 0.0            | 0.0              | 43.5           | 34.6             |
| 146 | Human Plasma exp_4 | 31529        | Alpha-2-HS-glycoprotein  | VCQDCPLLAPLNDTR_6_5_1_3   | 26.4                                    | 0.0              | 0.0            | 0.0              | 100.0            | 23.0              | 58.7           | 0.0              | 0.0            | 0.0              | 23.3           | 0.0              | 58.9           | 0.0              |
| 147 | Human Plasma exp_5 | 30597        | Alpha-2-HS-glycoprotein  | VCQDCPLLAPLNDTR_6_5_1_3   | 32.9                                    | 0.0              | 0.0            | 0.0              | 100.0            | 31.9              | 69.8           | 0.0              | 0.0            | 0.0              | 0.0            | 0.0              | 62.4           | 0.0              |
| 148 | Human Plasma exp_5 | 28906        | Aminopeptidase N         | VPVTLALNNTLFLIEER_4_4_0_1 | 89.5                                    | 0.0              | 0.0            | 0.0              | 37.1             | 0.0               | 0.0            | 0.0              | 14.8           | 0.0              | 52.1           | 0.0              | 100.0          | 0.0              |
| 149 | Human Plasma exp_1 | 1530         | Angiotensinogen          | NCTSR_5_4_0_2             | 59.9                                    | 0.0              | 4.0            | 0.0              | 100.0            | 0.0               | 30.2           | 0.0              | 0.0            | 0.0              | 2.3            | 0.0              | 38.9           | 0.0              |
| 150 | Human Plasma exp_2 | 1557         | Angiotensinogen          | NCTSR_5_4_0_2             | 55.1                                    | 0.0              | 5.3            | 0.0              | 100.0            | 0.0               | 42.5           | 0.0              | 1.9            | 0.0              | 4.3            | 0.0              | 38.9           | 0.0              |
| 151 | Human Plasma exp_3 | 1544         | Angiotensinogen          | NCTSR_5_4_0_2             | 53.8                                    | 0.0              | 5.5            | 0.0              | 100.0            | 0.0               | 41.0           | 0.0              | 1.7            | 0.0              | 5.1            | 0.0              | 40.0           | 0.0              |
| 152 | Human Plasma exp_4 | 1592         | Angiotensinogen          | NCTSR_5_4_0_2             | 54.9                                    | 0.0              | 6.2            | 0.0              | 100.0            | 0.0               | 54.4           | 0.0              | 2.8            | 0.0              | 4.2            | 0.0              | 40.6           | 0.0              |
| 153 | Human Plasma exp_5 | 1511         | Angiotensinogen          | NCTSR_5_4_0_2             | 51.0                                    | 0.0              | 4.0            | 0.0              | 100.0            | 0.0               | 40.1           | 0.0              | 2.1            | 0.0              | 4.2            | 0.0              | 36.4           | 0.0              |
| 154 | Human Plasma exp_1 | 3219         | Angiotensinogen          | NCTSR_6_5_0_3             | 36.2                                    | 0.0              | 0.0            | 0.0              | 100.0            | 0.0               | 29.1           | 0.0              | 0.0            | 0.0              | 3.3            | 0.0              | 42.8           | 0.0              |
| 155 | Human Plasma exp_2 | 3309         | Angiotensinogen          | NCTSR_6_5_0_3             | 24.7                                    | 0.0              | 0.0            | 0.0              | 100.0            | 0.0               | 34.3           | 0.0              | 0.0            | 0.0              | 3.4            | 0.0              | 22.1           | 0.0              |
| 156 | Human Plasma exp_5 | 3239         | Angiotensinogen          | NCTSR_6_5_0_3             | 33.1                                    | 0.0              | 0.0            | 0.0              | 100.0            | 0.0               | 26.5           | 0.0              | 0.0            | 0.0              | 3.6            | 0.0              | 41.7           | 0.0              |

Supplementary Table 3. Continued.

| No. | Experiments        | CID Scan No. | N-glycoproteins       | N-glycopeptides                | Relative intensities of B/Y series ions |                  |                |                  |                  |                   |                |                  |                |                  |                |                  |                |                  |
|-----|--------------------|--------------|-----------------------|--------------------------------|-----------------------------------------|------------------|----------------|------------------|------------------|-------------------|----------------|------------------|----------------|------------------|----------------|------------------|----------------|------------------|
|     |                    |              |                       |                                | B <sub>2</sub>                          | B <sub>2</sub> F | B <sub>3</sub> | B <sub>3</sub> F | B <sub>2</sub> S | B <sub>2</sub> SF | Y <sub>1</sub> | Y <sub>1</sub> F | Y <sub>2</sub> | Y <sub>2</sub> F | Y <sub>3</sub> | Y <sub>3</sub> F | Y <sub>4</sub> | Y <sub>4</sub> F |
| 157 | Human Plasma exp_1 | 25028        | Apolipoprotein C-IV   | ELLETVVNR_5_4_0_2              | 23.1                                    | 0.0              | 0.0            | 0.0              | 100.0            | 0.0               | 59.0           | 0.0              | 0.0            | 0.0              | 1.8            | 0.0              | 36.7           | 0.0              |
| 158 | Human Plasma exp_5 | 24778        | Apolipoprotein C-IV   | ELLETVVNR_5_4_0_2              | 45.0                                    | 0.0              | 0.0            | 0.0              | 100.0            | 0.0               | 42.7           | 0.0              | 0.0            | 0.0              | 2.4            | 0.0              | 31.3           | 0.0              |
| 159 | Human Plasma exp_5 | 24718        | Apolipoprotein D      | ADGTVNQIEGEATPVNLTEPAK_5_4_0_1 | 72.5                                    | 0.0              | 10.2           | 0.0              | 69.3             | 0.0               | 100.0          | 0.0              | 0.0            | 0.0              | 0.0            | 0.0              | 44.7           | 0.0              |
| 160 | Human Plasma exp_2 | 25293        | Apolipoprotein D      | ADGTVNQIEGEATPVNLTEPAK_5_4_1_1 | 86.8                                    | 7.3              | 8.6            | 0.0              | 87.2             | 0.0               | 100.0          | 43.0             | 0.0            | 0.0              | 7.9            | 0.0              | 58.3           | 53.5             |
| 161 | Human Plasma exp_3 | 24804        | Apolipoprotein D      | ADGTVNQIEGEATPVNLTEPAK_5_4_1_1 | 44.8                                    | 8.7              | 11.8           | 0.0              | 63.9             | 7.6               | 100.0          | 55.1             | 4.1            | 2.6              | 12.2           | 0.0              | 43.3           | 31.9             |
| 162 | Human Plasma exp_4 | 25277        | Apolipoprotein D      | ADGTVNQIEGEATPVNLTEPAK_5_4_1_1 | 100.0                                   | 0.0              | 8.3            | 0.0              | 74.5             | 0.0               | 56.9           | 49.4             | 0.0            | 0.0              | 0.0            | 0.0              | 42.5           | 45.8             |
| 163 | Human Plasma exp_2 | 27855        | Apolipoprotein D      | ADGTVNQIEGEATPVNLTEPAK_5_4_1_2 | 37.8                                    | 0.0              | 0.0            | 0.0              | 100.0            | 10.3              | 58.5           | 39.0             | 0.0            | 0.0              | 0.0            | 0.0              | 26.9           | 30.4             |
| 164 | Human Plasma exp_3 | 24430        | Beta-2-glycoprotein 1 | LGNWSAMPSCCK_5_4_0_2           | 62.1                                    | 0.0              | 0.0            | 0.0              | 100.0            | 0.0               | 33.9           | 0.0              | 0.0            | 0.0              | 12.8           | 0.0              | 64.5           | 0.0              |
| 165 | Human Plasma exp_4 | 24919        | Beta-2-glycoprotein 1 | LGNWSAMPSCCK_5_4_0_2           | 55.1                                    | 0.0              | 7.2            | 0.0              | 100.0            | 0.0               | 15.0           | 0.0              | 0.0            | 0.0              | 2.8            | 0.0              | 74.8           | 0.0              |
| 166 | Human Plasma exp_2 | 15673        | Beta-2-glycoprotein 1 | VYKPSAGNNSLYR_4_3_0_1          | 51.0                                    | 0.0              | 0.0            | 0.0              | 48.5             | 0.0               | 40.1           | 0.0              | 0.0            | 0.0              | 3.6            | 0.0              | 100.0          | 0.0              |
| 167 | Human Plasma exp_4 | 18459        | Beta-2-glycoprotein 1 | VYKPSAGNNSLYR_6_5_1_3          | 63.2                                    | 0.0              | 0.0            | 0.0              | 100.0            | 28.4              | 12.8           | 0.0              | 0.0            | 0.0              | 0.0            | 0.0              | 11.7           | 0.0              |
| 168 | Human Plasma exp_5 | 22408        | Biotinidase           | FNDTEVLQR_5_4_0_2              | 53.7                                    | 0.0              | 7.8            | 0.0              | 100.0            | 0.0               | 49.7           | 0.0              | 0.0            | 0.0              | 3.5            | 0.0              | 38.3           | 0.0              |
| 169 | Human Plasma exp_1 | 24313        | Biotinidase           | NPVGLIGAENATGETDPSHSK_6_5_0_3  | 19.5                                    | 0.0              | 0.0            | 0.0              | 100.0            | 0.0               | 56.2           | 0.0              | 0.0            | 0.0              | 17.8           | 0.0              | 54.0           | 0.0              |
| 170 | Human Plasma exp_3 | 30160        | Ceruloplasmin         | AGLQAFFQVQECNK_5_4_0_2         | 55.2                                    | 0.0              | 7.1            | 0.0              | 100.0            | 0.0               | 71.8           | 0.0              | 0.0            | 0.0              | 0.0            | 0.0              | 35.8           | 0.0              |
| 171 | Human Plasma exp_4 | 30413        | Ceruloplasmin         | AGLQAFFQVQECNK_5_4_0_2         | 70.5                                    | 0.0              | 0.0            | 0.0              | 100.0            | 0.0               | 62.3           | 0.0              | 0.0            | 0.0              | 12.0           | 0.0              | 64.4           | 0.0              |
| 172 | Human Plasma exp_3 | 20507        | Ceruloplasmin         | EHEGAIYPDNTTDFQR_4_3_0_1       | 45.5                                    | 0.0              | 0.0            | 0.0              | 51.2             | 0.0               | 76.7           | 0.0              | 0.0            | 0.0              | 11.4           | 0.0              | 100.0          | 0.0              |
| 173 | Human Plasma exp_3 | 20296        | Ceruloplasmin         | EHEGAIYPDNTTDFQR_4_3_1_1       | 19.4                                    | 0.0              | 0.0            | 0.0              | 57.6             | 0.0               | 16.2           | 0.0              | 0.0            | 0.0              | 0.0            | 0.0              | 52.4           | 100.0            |
| 174 | Human Plasma exp_2 | 21574        | Ceruloplasmin         | ELHHLQEQNVSNAFLDK_5_4_0_2      | 91.1                                    | 0.0              | 9.3            | 0.0              | 100.0            | 0.0               | 88.9           | 0.0              | 0.0            | 0.0              | 17.8           | 0.0              | 86.3           | 0.0              |
| 175 | Human Plasma exp_2 | 21244        | Ceruloplasmin         | ELHHLQEQNVSNAFLDK_5_4_1_2      | 78.8                                    | 0.0              | 0.0            | 0.0              | 100.0            | 0.0               | 52.5           | 0.0              | 0.0            | 0.0              | 9.6            | 17.0             | 44.6           | 78.2             |
| 176 | Human Plasma exp_1 | 29132        | Ceruloplasmin         | ENLTAPGSDSAVFFEQGTTR_5_4_0_2   | 47.7                                    | 0.0              | 4.2            | 0.0              | 100.0            | 0.0               | 56.9           | 0.0              | 10.7           | 0.0              | 15.6           | 0.0              | 74.9           | 0.0              |
| 177 | Human Plasma exp_2 | 29871        | Ceruloplasmin         | ENLTAPGSDSAVFFEQGTTR_5_4_0_2   | 31.7                                    | 0.0              | 0.0            | 0.0              | 100.0            | 0.0               | 78.9           | 0.0              | 0.0            | 0.0              | 21.9           | 0.0              | 77.8           | 0.0              |
| 178 | Human Plasma exp_3 | 29403        | Ceruloplasmin         | ENLTAPGSDSAVFFEQGTTR_5_4_0_2   | 56.7                                    | 0.0              | 11.6           | 0.0              | 100.0            | 0.0               | 88.0           | 0.0              | 0.0            | 0.0              | 12.6           | 0.0              | 69.3           | 0.0              |
| 179 | Human Plasma exp_4 | 29625        | Ceruloplasmin         | ENLTAPGSDSAVFFEQGTTR_5_4_0_2   | 52.7                                    | 0.0              | 7.2            | 0.0              | 100.0            | 0.0               | 77.7           | 0.0              | 9.8            | 0.0              | 14.5           | 0.0              | 94.6           | 0.0              |
| 180 | Human Plasma exp_5 | 28716        | Ceruloplasmin         | ENLTAPGSDSAVFFEQGTTR_5_4_0_2   | 57.4                                    | 0.0              | 0.0            | 0.0              | 94.8             | 0.0               | 66.2           | 0.0              | 0.0            | 0.0              | 10.7           | 0.0              | 100.0          | 0.0              |
| 181 | Human Plasma exp_1 | 11457        | Cholinesterase        | DNNSIITR_5_4_0_1               | 100.0                                   | 0.0              | 7.4            | 0.0              | 80.1             | 0.0               | 36.0           | 0.0              | 0.0            | 0.0              | 0.0            | 0.0              | 40.9           | 0.0              |
| 182 | Human Plasma exp_2 | 11650        | Cholinesterase        | DNNSIITR_5_4_0_1               | 100.0                                   | 0.0              | 5.1            | 0.0              | 64.0             | 0.0               | 37.8           | 0.0              | 0.0            | 0.0              | 0.0            | 0.0              | 46.1           | 0.0              |

Supplementary Table 3. Continued.

| No. | Experiments        | CID Scan No. | N-glycoproteins        | N-glycopeptides        | Relative intensities of B/Y series ions |                  |                |                  |                  |                   |                |                  |                |                  |                |                  |                |                  |
|-----|--------------------|--------------|------------------------|------------------------|-----------------------------------------|------------------|----------------|------------------|------------------|-------------------|----------------|------------------|----------------|------------------|----------------|------------------|----------------|------------------|
|     |                    |              |                        |                        | B <sub>2</sub>                          | B <sub>2</sub> F | B <sub>3</sub> | B <sub>3</sub> F | B <sub>2</sub> S | B <sub>2</sub> SF | Y <sub>1</sub> | Y <sub>1</sub> F | Y <sub>2</sub> | Y <sub>2</sub> F | Y <sub>3</sub> | Y <sub>3</sub> F | Y <sub>4</sub> | Y <sub>4</sub> F |
| 183 | Human Plasma exp_5 | 11547        | Cholinesterase         | DNNSIITR_5_4_0_1       | 100.0                                   | 0.0              | 5.6            | 0.0              | 62.3             | 0.0               | 35.0           | 0.0              | 0.0            | 0.0              | 0.0            | 0.0              | 21.4           | 0.0              |
| 184 | Human Plasma exp_5 | 15800        | Cholinesterase         | DNNSIITR_5_4_0_2       | 66.8                                    | 0.0              | 4.4            | 0.0              | 100.0            | 0.0               | 47.6           | 0.0              | 0.0            | 0.0              | 2.4            | 0.0              | 46.8           | 0.0              |
| 185 | Human Plasma exp_1 | 4485         | Cholinesterase         | DNYTK_5_4_0_2          | 51.7                                    | 0.0              | 2.7            | 0.0              | 100.0            | 0.0               | 24.3           | 0.0              | 1.1            | 0.0              | 0.0            | 0.0              | 50.0           | 0.0              |
| 186 | Human Plasma exp_2 | 4550         | Cholinesterase         | DNYTK_5_4_0_2          | 46.5                                    | 0.0              | 4.5            | 0.0              | 100.0            | 0.0               | 25.1           | 0.0              | 0.0            | 0.0              | 1.3            | 0.0              | 41.0           | 0.0              |
| 187 | Human Plasma exp_3 | 4501         | Cholinesterase         | DNYTK_5_4_0_2          | 46.4                                    | 0.0              | 4.0            | 0.0              | 100.0            | 0.0               | 25.2           | 0.0              | 1.5            | 0.0              | 0.0            | 0.0              | 36.9           | 0.0              |
| 188 | Human Plasma exp_4 | 4632         | Cholinesterase         | DNYTK_5_4_0_2          | 63.3                                    | 0.0              | 4.8            | 0.0              | 100.0            | 0.0               | 19.2           | 0.0              | 1.6            | 0.0              | 0.0            | 0.0              | 43.0           | 0.0              |
| 189 | Human Plasma exp_5 | 4514         | Cholinesterase         | DNYTK_5_4_0_2          | 44.4                                    | 0.0              | 4.1            | 0.0              | 100.0            | 0.0               | 21.6           | 0.0              | 0.0            | 0.0              | 3.3            | 0.0              | 35.7           | 0.0              |
| 190 | Human Plasma exp_2 | 17003        | Cholinesterase         | ENETEIK_5_4_0_2        | 51.1                                    | 0.0              | 0.0            | 0.0              | 100.0            | 0.0               | 38.8           | 0.0              | 0.0            | 0.0              | 5.5            | 0.0              | 34.6           | 0.0              |
| 191 | Human Plasma exp_5 | 16747        | Cholinesterase         | ENETEIK_5_4_0_2        | 44.9                                    | 0.0              | 0.0            | 0.0              | 100.0            | 0.0               | 36.5           | 0.0              | 0.0            | 0.0              | 2.8            | 0.0              | 28.8           | 0.0              |
| 192 | Human Plasma exp_1 | 12515        | Clusterin              | EDALNETR_5_4_0_2       | 34.1                                    | 0.0              | 7.2            | 0.0              | 100.0            | 0.0               | 29.1           | 0.0              | 0.0            | 0.0              | 0.0            | 0.0              | 13.4           | 0.0              |
| 193 | Human Plasma exp_1 | 16327        | Clusterin              | EDALNETR_6_5_0_3       | 19.8                                    | 0.0              | 0.0            | 0.0              | 100.0            | 0.0               | 57.2           | 0.0              | 0.0            | 0.0              | 5.7            | 0.0              | 34.1           | 0.0              |
| 194 | Human Plasma exp_3 | 16379        | Clusterin              | EDALNETR_6_5_1_3       | 47.0                                    | 3.8              | 0.0            | 0.0              | 100.0            | 13.2              | 9.9            | 0.0              | 0.0            | 0.0              | 0.0            | 0.0              | 0.0            | 0.0              |
| 195 | Human Plasma exp_4 | 16705        | Clusterin              | EDALNETR_6_5_1_3       | 0.0                                     | 5.3              | 0.0            | 0.0              | 100.0            | 36.8              | 74.0           | 0.0              | 0.0            | 0.0              | 0.0            | 0.0              | 27.7           | 0.0              |
| 196 | Human Plasma exp_5 | 16430        | Clusterin              | EDALNETR_6_5_1_3       | 0.0                                     | 0.0              | 6.1            | 0.0              | 100.0            | 34.1              | 41.1           | 0.0              | 0.0            | 0.0              | 0.0            | 0.0              | 28.0           | 0.0              |
| 197 | Human Plasma exp_5 | 5173         | Clusterin              | HNSTGCLR_6_5_0_3       | 57.7                                    | 0.0              | 0.0            | 0.0              | 100.0            | 0.0               | 2.4            | 0.0              | 1.4            | 0.0              | 0.0            | 0.0              | 1.7            | 0.0              |
| 198 | Human Plasma exp_5 | 5336         | Clusterin              | HNSTGCLR_6_5_0_3       | 14.0                                    | 0.0              | 0.0            | 0.0              | 100.0            | 0.0               | 29.0           | 0.0              | 3.1            | 0.0              | 0.0            | 0.0              | 8.7            | 0.0              |
| 199 | Human Plasma exp_1 | 27042        | Clusterin              | LANLTQGEDQYYLR_5_4_0_2 | 62.7                                    | 0.0              | 6.8            | 0.0              | 100.0            | 0.0               | 60.8           | 0.0              | 7.6            | 0.0              | 14.3           | 1.9              | 71.1           | 0.0              |
| 200 | Human Plasma exp_2 | 27735        | Clusterin              | LANLTQGEDQYYLR_5_4_0_2 | 66.8                                    | 0.0              | 8.7            | 0.0              | 100.0            | 0.0               | 56.1           | 0.0              | 12.9           | 0.0              | 17.9           | 3.0              | 76.7           | 0.0              |
| 201 | Human Plasma exp_3 | 27148        | Clusterin              | LANLTQGEDQYYLR_5_4_0_2 | 46.5                                    | 0.0              | 2.8            | 0.0              | 100.0            | 0.0               | 38.0           | 0.0              | 0.0            | 0.0              | 18.8           | 6.6              | 49.5           | 0.0              |
| 202 | Human Plasma exp_4 | 27518        | Clusterin              | LANLTQGEDQYYLR_5_4_0_2 | 57.2                                    | 0.0              | 5.1            | 0.0              | 100.0            | 0.0               | 58.8           | 0.0              | 7.4            | 0.0              | 13.7           | 0.0              | 68.0           | 0.0              |
| 203 | Human Plasma exp_5 | 26765        | Clusterin              | LANLTQGEDQYYLR_5_4_0_2 | 68.4                                    | 0.0              | 3.2            | 0.0              | 100.0            | 0.0               | 62.5           | 0.0              | 8.9            | 0.0              | 23.2           | 1.7              | 77.6           | 0.0              |
| 204 | Human Plasma exp_2 | 29998        | Clusterin              | LANLTQGEDQYYLR_6_5_1_3 | 38.3                                    | 0.0              | 0.0            | 0.0              | 100.0            | 17.0              | 40.7           | 0.0              | 0.0            | 0.0              | 5.2            | 0.0              | 40.6           | 0.0              |
| 205 | Human Plasma exp_3 | 29473        | Clusterin              | LANLTQGEDQYYLR_6_5_1_3 | 40.2                                    | 0.0              | 0.0            | 0.0              | 100.0            | 11.9              | 25.8           | 0.0              | 0.0            | 0.0              | 0.0            | 0.0              | 12.7           | 0.0              |
| 206 | Human Plasma exp_4 | 29768        | Clusterin              | LANLTQGEDQYYLR_6_5_1_3 | 26.3                                    | 0.0              | 0.0            | 0.0              | 100.0            | 15.2              | 14.5           | 0.0              | 3.2            | 0.0              | 0.0            | 0.0              | 26.4           | 0.0              |
| 207 | Human Plasma exp_1 | 14322        | Coagulation factor XII | NHSCEPCQLAVR_5_4_0_2   | 69.4                                    | 0.0              | 4.8            | 0.0              | 100.0            | 0.0               | 55.5           | 0.0              | 6.8            | 0.0              | 14.8           | 0.0              | 71.6           | 0.0              |
| 208 | Human Plasma exp_1 | 14340        | Coagulation factor XII | NHSCEPCQLAVR_5_4_0_2   | 27.5                                    | 0.0              | 0.0            | 0.0              | 100.0            | 0.0               | 90.1           | 0.0              | 0.0            | 0.0              | 18.8           | 0.0              | 28.7           | 0.0              |

**Supplementary Table 3. Continued.**

| No. | Experiments        | CID Scan No. | N-glycoproteins                     | N-glycopeptides        | Relative intensities of B/Y series ions |                  |                |                  |                  |                   |                |                  |                |                  |                |                  |                |                  |
|-----|--------------------|--------------|-------------------------------------|------------------------|-----------------------------------------|------------------|----------------|------------------|------------------|-------------------|----------------|------------------|----------------|------------------|----------------|------------------|----------------|------------------|
|     |                    |              |                                     |                        | B <sub>2</sub>                          | B <sub>2</sub> F | B <sub>3</sub> | B <sub>3</sub> F | B <sub>2</sub> S | B <sub>2</sub> SF | Y <sub>1</sub> | Y <sub>1</sub> F | Y <sub>2</sub> | Y <sub>2</sub> F | Y <sub>3</sub> | Y <sub>3</sub> F | Y <sub>4</sub> | Y <sub>4</sub> F |
| 209 | Human Plasma exp_2 | 14554        | Coagulation factor XII              | NHSCEPCQTLAVR_5_4_0_2  | 79.0                                    | 0.0              | 3.2            | 0.0              | 100.0            | 0.0               | 54.0           | 0.0              | 3.3            | 0.0              | 10.1           | 0.0              | 67.7           | 0.0              |
| 210 | Human Plasma exp_2 | 14620        | Coagulation factor XII              | NHSCEPCQTLAVR_5_4_0_2  | 29.7                                    | 0.0              | 0.0            | 0.0              | 100.0            | 0.0               | 74.4           | 0.0              | 17.1           | 0.0              | 0.0            | 0.0              | 19.9           | 0.0              |
| 211 | Human Plasma exp_3 | 14357        | Coagulation factor XII              | NHSCEPCQTLAVR_5_4_0_2  | 61.5                                    | 0.0              | 6.9            | 0.0              | 100.0            | 0.0               | 65.6           | 0.0              | 8.7            | 0.0              | 11.0           | 0.0              | 68.4           | 0.0              |
| 212 | Human Plasma exp_3 | 14322        | Coagulation factor XII              | NHSCEPCQTLAVR_5_4_0_2  | 30.1                                    | 0.0              | 0.0            | 0.0              | 100.0            | 0.0               | 91.4           | 0.0              | 14.3           | 0.0              | 0.0            | 0.0              | 31.9           | 0.0              |
| 213 | Human Plasma exp_4 | 14648        | Coagulation factor XII              | NHSCEPCQTLAVR_5_4_0_2  | 66.9                                    | 0.0              | 6.1            | 0.0              | 100.0            | 0.0               | 54.5           | 0.0              | 9.7            | 0.0              | 11.2           | 0.0              | 72.3           | 0.0              |
| 214 | Human Plasma exp_4 | 14646        | Coagulation factor XII              | NHSCEPCQTLAVR_5_4_0_2  | 32.1                                    | 0.0              | 0.0            | 0.0              | 100.0            | 0.0               | 69.7           | 0.0              | 15.2           | 0.0              | 0.0            | 0.0              | 21.3           | 0.0              |
| 215 | Human Plasma exp_5 | 14392        | Coagulation factor XII              | NHSCEPCQTLAVR_5_4_0_2  | 67.1                                    | 0.0              | 5.1            | 0.0              | 100.0            | 0.0               | 49.0           | 0.0              | 9.0            | 0.0              | 14.4           | 0.0              | 69.0           | 0.0              |
| 216 | Human Plasma exp_2 | 3044         | Coagulation factor XII              | NVTAEQAR_5_4_0_1       | 100.0                                   | 0.0              | 0.0            | 0.0              | 55.7             | 5.9               | 23.6           | 0.0              | 0.0            | 0.0              | 0.0            | 0.0              | 20.6           | 0.0              |
| 217 | Human Plasma exp_3 | 2946         | Coagulation factor XII              | NVTAEQAR_5_4_0_1       | 100.0                                   | 0.0              | 6.5            | 0.0              | 55.7             | 0.0               | 32.7           | 0.0              | 0.0            | 0.0              | 0.0            | 0.0              | 7.6            | 0.0              |
| 218 | Human Plasma exp_1 | 5719         | Coagulation factor XII              | NVTAEQAR_5_4_0_2       | 51.3                                    | 0.0              | 4.7            | 0.0              | 100.0            | 0.0               | 42.9           | 0.0              | 0.0            | 0.0              | 3.8            | 0.0              | 38.4           | 0.0              |
| 219 | Human Plasma exp_2 | 5855         | Coagulation factor XII              | NVTAEQAR_5_4_0_2       | 49.3                                    | 0.0              | 6.9            | 0.0              | 100.0            | 0.0               | 59.9           | 0.0              | 2.8            | 0.0              | 5.4            | 0.0              | 49.3           | 0.0              |
| 220 | Human Plasma exp_3 | 5778         | Coagulation factor XII              | NVTAEQAR_5_4_0_2       | 53.3                                    | 0.0              | 3.5            | 0.0              | 100.0            | 0.0               | 46.6           | 0.0              | 0.0            | 0.0              | 5.7            | 0.0              | 36.0           | 0.0              |
| 221 | Human Plasma exp_5 | 5807         | Coagulation factor XII              | NVTAEQAR_5_4_0_2       | 54.7                                    | 0.0              | 5.8            | 0.0              | 100.0            | 0.0               | 50.9           | 0.0              | 1.8            | 0.0              | 6.7            | 0.0              | 40.1           | 0.0              |
| 222 | Human Plasma exp_5 | 10110        | Coagulation factor XII              | NVTAEQAR_6_5_0_3       | 14.6                                    | 0.0              | 0.0            | 0.0              | 100.0            | 0.0               | 63.2           | 0.0              | 6.3            | 0.0              | 0.0            | 0.0              | 48.2           | 0.0              |
| 223 | Human Plasma exp_1 | 16554        | Complement component C7             | NYTLTGR_5_4_1_2        | 54.6                                    | 0.0              | 7.7            | 0.0              | 100.0            | 3.9               | 10.8           | 33.1             | 0.0            | 0.0              | 0.0            | 0.0              | 7.6            | 31.6             |
| 224 | Human Plasma exp_2 | 16861        | Complement component C7             | NYTLTGR_5_4_1_2        | 59.6                                    | 0.0              | 4.3            | 0.0              | 100.0            | 0.0               | 2.2            | 14.5             | 0.0            | 0.0              | 0.0            | 0.0              | 0.0            | 0.0              |
| 225 | Human Plasma exp_3 | 16589        | Complement component C7             | NYTLTGR_5_4_1_2        | 59.6                                    | 0.0              | 3.7            | 0.0              | 100.0            | 0.0               | 11.6           | 34.3             | 0.0            | 0.0              | 0.0            | 0.0              | 6.6            | 31.7             |
| 226 | Human Plasma exp_4 | 16975        | Complement component C7             | NYTLTGR_5_4_1_2        | 58.3                                    | 0.0              | 6.4            | 0.0              | 100.0            | 0.0               | 14.9           | 33.1             | 0.0            | 0.0              | 0.0            | 0.0              | 5.6            | 26.0             |
| 227 | Human Plasma exp_5 | 16666        | Complement component C7             | NYTLTGR_5_4_1_2        | 51.0                                    | 0.0              | 7.9            | 0.0              | 100.0            | 0.0               | 10.0           | 28.2             | 0.0            | 0.0              | 0.0            | 0.0              | 7.5            | 31.0             |
| 228 | Human Plasma exp_1 | 19516        | Complement component C8 alpha chain | GGSSGWSGGLAQNR_5_4_0_2 | 66.6                                    | 0.0              | 0.0            | 0.0              | 100.0            | 0.0               | 42.6           | 0.0              | 0.0            | 0.0              | 5.9            | 0.0              | 63.3           | 0.0              |
| 229 | Human Plasma exp_3 | 19270        | Complement component C8 alpha chain | GGSSGWSGGLAQNR_5_4_0_2 | 73.0                                    | 0.0              | 4.7            | 0.0              | 100.0            | 0.0               | 40.8           | 0.0              | 1.9            | 0.0              | 9.7            | 0.0              | 73.9           | 0.0              |
| 230 | Human Plasma exp_5 | 19483        | Complement component C8 alpha chain | GGSSGWSGGLAQNR_5_4_0_2 | 80.9                                    | 0.0              | 4.6            | 0.0              | 100.0            | 0.0               | 45.9           | 0.0              | 0.0            | 0.0              | 6.1            | 0.0              | 46.3           | 0.0              |
| 231 | Human Plasma exp_1 | 2149         | Complement component C8 beta chain  | NVTEK_4_3_0_1          | 30.3                                    | 0.0              | 5.2            | 0.0              | 50.9             | 0.0               | 43.6           | 0.0              | 2.7            | 0.0              | 5.7            | 0.0              | 100.0          | 0.0              |
| 232 | Human Plasma exp_4 | 2309         | Complement component C8 beta chain  | NVTEK_4_3_0_1          | 51.8                                    | 0.0              | 6.2            | 0.0              | 77.0             | 0.0               | 43.5           | 0.0              | 3.5            | 0.0              | 0.0            | 0.0              | 100.0          | 0.0              |
| 233 | Human Plasma exp_5 | 2192         | Complement component C8 beta chain  | NVTEK_4_3_0_1          | 47.7                                    | 0.0              | 0.0            | 0.0              | 92.7             | 0.0               | 68.7           | 0.0              | 6.0            | 0.0              | 0.0            | 0.0              | 100.0          | 0.0              |
| 234 | Human Plasma exp_1 | 2116         | Complement component C8 beta chain  | NVTEK_5_4_0_2          | 57.4                                    | 0.0              | 5.2            | 0.0              | 100.0            | 0.0               | 34.3           | 0.0              | 3.4            | 0.0              | 4.9            | 0.0              | 44.9           | 0.0              |

**Supplementary Table 3. Continued.**

| No. | Experiments        | CID Scan No. | N-glycoproteins                        | N-glycopeptides                  | Relative intensities of B/Y series ions |                  |                |                  |                  |                   |                |                  |                |                  |                |                  |                |                  |
|-----|--------------------|--------------|----------------------------------------|----------------------------------|-----------------------------------------|------------------|----------------|------------------|------------------|-------------------|----------------|------------------|----------------|------------------|----------------|------------------|----------------|------------------|
|     |                    |              |                                        |                                  | B <sub>2</sub>                          | B <sub>2</sub> F | B <sub>3</sub> | B <sub>3</sub> F | B <sub>2</sub> S | B <sub>2</sub> SF | Y <sub>1</sub> | Y <sub>1</sub> F | Y <sub>2</sub> | Y <sub>2</sub> F | Y <sub>3</sub> | Y <sub>3</sub> F | Y <sub>4</sub> | Y <sub>4</sub> F |
| 235 | Human Plasma exp_1 | 2128         | Complement component C8 beta chain     | NVTEK_5_4_0_2                    | 0.0                                     | 0.0              | 0.0            | 0.0              | 100.0            | 0.0               | 18.9           | 0.0              | 6.0            | 0.0              | 4.0            | 0.0              | 13.5           | 0.0              |
| 236 | Human Plasma exp_2 | 2272         | Complement component C8 beta chain     | NVTEK_5_4_0_2                    | 52.6                                    | 0.0              | 5.7            | 0.0              | 100.0            | 0.0               | 32.5           | 0.0              | 2.6            | 0.0              | 3.9            | 0.0              | 37.4           | 0.0              |
| 237 | Human Plasma exp_3 | 2162         | Complement component C8 beta chain     | NVTEK_5_4_0_2                    | 56.2                                    | 0.0              | 4.7            | 0.0              | 100.0            | 0.0               | 30.6           | 0.0              | 3.0            | 0.0              | 4.0            | 0.0              | 43.9           | 0.0              |
| 238 | Human Plasma exp_4 | 2273         | Complement component C8 beta chain     | NVTEK_5_4_0_2                    | 32.0                                    | 0.0              | 5.8            | 0.0              | 100.0            | 0.0               | 22.4           | 0.0              | 0.0            | 0.0              | 1.6            | 0.0              | 45.9           | 0.0              |
| 239 | Human Plasma exp_5 | 2287         | Complement component C8 beta chain     | NVTEK_5_4_0_2                    | 54.4                                    | 0.0              | 5.2            | 0.0              | 100.0            | 0.0               | 25.1           | 0.0              | 0.0            | 0.0              | 0.0            | 0.0              | 35.6           | 0.0              |
| 240 | Human Plasma exp_1 | 21593        | Complement factor H-related protein 3  | FVQGNSTEVACHPGYGLPK_5_4_0_2      | 71.3                                    | 0.0              | 0.0            | 0.0              | 100.0            | 0.0               | 40.1           | 0.0              | 0.0            | 0.0              | 2.2            | 0.0              | 23.5           | 0.0              |
| 241 | Human Plasma exp_4 | 21901        | Complement factor H-related protein 3  | FVQGNSTEVACHPGYGLPK_5_4_0_2      | 74.6                                    | 0.0              | 7.3            | 0.0              | 100.0            | 0.0               | 49.4           | 0.0              | 0.0            | 0.0              | 9.1            | 0.0              | 53.2           | 0.0              |
| 242 | Human Plasma exp_3 | 15012        | Complement factor I                    | FLNNGTCTAEGK_5_4_0_2             | 74.5                                    | 0.0              | 6.0            | 0.0              | 100.0            | 0.0               | 25.2           | 0.0              | 0.0            | 0.0              | 8.8            | 0.0              | 49.9           | 0.0              |
| 243 | Human Plasma exp_5 | 15048        | Complement factor I                    | FLNNGTCTAEGK_5_4_0_2             | 69.7                                    | 0.0              | 5.1            | 0.0              | 100.0            | 0.0               | 36.2           | 0.0              | 0.0            | 0.0              | 4.5            | 0.0              | 55.9           | 0.0              |
| 244 | Human Plasma exp_4 | 3395         | Complement factor I                    | NGTAVCATNR_5_4_0_1               | 100.0                                   | 0.0              | 9.9            | 0.0              | 78.3             | 0.0               | 58.6           | 0.0              | 0.0            | 0.0              | 0.0            | 0.0              | 43.9           | 0.0              |
| 245 | Human Plasma exp_1 | 6679         | Complement factor I                    | NGTAVCATNR_5_4_0_2               | 53.7                                    | 0.0              | 4.5            | 0.0              | 100.0            | 0.0               | 65.8           | 0.0              | 0.0            | 0.0              | 7.2            | 0.0              | 60.8           | 0.0              |
| 246 | Human Plasma exp_2 | 6669         | Complement factor I                    | NGTAVCATNR_5_4_0_2               | 51.7                                    | 0.0              | 0.0            | 0.0              | 100.0            | 0.0               | 53.3           | 0.0              | 0.0            | 0.0              | 4.7            | 0.0              | 43.0           | 0.0              |
| 247 | Human Plasma exp_3 | 6787         | Complement factor I                    | NGTAVCATNR_5_4_0_2               | 46.4                                    | 0.0              | 6.4            | 0.0              | 100.0            | 0.0               | 62.5           | 0.0              | 1.4            | 0.0              | 6.6            | 0.0              | 52.2           | 0.0              |
| 248 | Human Plasma exp_4 | 6836         | Complement factor I                    | NGTAVCATNR_5_4_0_2               | 59.7                                    | 0.0              | 6.8            | 0.0              | 100.0            | 0.0               | 61.8           | 0.0              | 0.0            | 0.0              | 8.4            | 0.0              | 54.6           | 0.0              |
| 249 | Human Plasma exp_5 | 6774         | Complement factor I                    | NGTAVCATNR_5_4_0_2               | 55.4                                    | 0.0              | 5.6            | 0.0              | 100.0            | 0.0               | 74.1           | 0.0              | 3.2            | 0.0              | 6.6            | 0.0              | 60.8           | 0.0              |
| 250 | Human Plasma exp_4 | 17592        | Desmocollin-2                          | ANYTILK_5_4_0_1                  | 100.0                                   | 0.0              | 8.6            | 0.0              | 67.6             | 0.0               | 20.4           | 0.0              | 0.0            | 0.0              | 0.0            | 0.0              | 24.9           | 0.0              |
| 251 | Human Plasma exp_2 | 22615        | Desmocollin-2                          | ANYTILK_5_4_0_2                  | 59.5                                    | 0.0              | 4.4            | 0.0              | 100.0            | 0.0               | 37.3           | 0.0              | 0.0            | 0.0              | 4.4            | 0.0              | 39.3           | 0.0              |
| 252 | Human Plasma exp_4 | 22567        | Desmocollin-2                          | ANYTILK_5_4_0_2                  | 57.7                                    | 0.0              | 4.1            | 0.0              | 100.0            | 0.0               | 50.9           | 0.0              | 2.2            | 0.0              | 4.5            | 0.0              | 44.0           | 0.0              |
| 253 | Human Plasma exp_3 | 24871        | Endoplasmic reticulum aminopeptidase 2 | DLEITNATLQSEEDSR_4_3_0_1         | 58.4                                    | 0.0              | 0.0            | 0.0              | 84.9             | 0.0               | 79.7           | 0.0              | 0.0            | 0.0              | 19.6           | 0.0              | 100.0          | 0.0              |
| 254 | Human Plasma exp_4 | 25603        | Endoplasmic reticulum aminopeptidase 2 | DLEITNATLQSEEDSR_5_4_0_2         | 64.5                                    | 0.0              | 5.9            | 0.0              | 100.0            | 0.0               | 19.1           | 0.0              | 3.2            | 0.0              | 19.6           | 0.0              | 59.6           | 0.0              |
| 255 | Human Plasma exp_1 | 24701        | Fetuin-B                               | VLYLAAYNCTLRPVSK_5_4_0_1         | 100.0                                   | 0.0              | 0.0            | 0.0              | 28.5             | 0.0               | 32.1           | 0.0              | 0.0            | 0.0              | 9.3            | 0.0              | 48.8           | 0.0              |
| 256 | Human Plasma exp_1 | 22837        | Ficolin-3                              | VELEDFNGNR_5_4_1_2               | 46.7                                    | 0.0              | 0.0            | 0.0              | 100.0            | 7.6               | 9.0            | 5.7              | 0.0            | 0.0              | 0.0            | 0.0              | 0.0            | 0.0              |
| 257 | Human Plasma exp_4 | 23285        | Ficolin-3                              | VELEDFNGNR_5_4_1_2               | 34.9                                    | 0.0              | 0.0            | 0.0              | 100.0            | 0.0               | 23.6           | 26.1             | 0.0            | 0.0              | 0.0            | 0.0              | 14.9           | 0.0              |
| 258 | Human Plasma exp_2 | 29232        | Haptoglobin                            | MVSHHNLTTGATLINEQWLLTTAK_5_4_0_2 | 51.5                                    | 0.0              | 0.0            | 0.0              | 100.0            | 0.0               | 83.9           | 0.0              | 0.0            | 0.0              | 17.7           | 0.0              | 69.1           | 0.0              |
| 259 | Human Plasma exp_1 | 27749        | Haptoglobin                            | VVLHPNYSQVDIGLIK_4_3_0_1         | 18.9                                    | 0.0              | 0.0            | 0.0              | 28.1             | 0.0               | 61.8           | 0.0              | 0.0            | 0.0              | 14.4           | 0.0              | 100.0          | 0.0              |
| 260 | Human Plasma exp_2 | 28444        | Haptoglobin                            | VVLHPNYSQVDIGLIK_4_3_0_1         | 27.8                                    | 0.0              | 0.0            | 0.0              | 39.8             | 0.0               | 45.2           | 0.0              | 0.0            | 0.0              | 12.6           | 0.0              | 100.0          | 0.0              |

**Supplementary Table 3. Continued.**

| No. | Experiments        | CID Scan No. | N-glycoproteins | N-glycopeptides          | Relative intensities of B/Y series ions |                  |                |                  |                  |                   |                |                  |                |                  |                |                  |                |                  |
|-----|--------------------|--------------|-----------------|--------------------------|-----------------------------------------|------------------|----------------|------------------|------------------|-------------------|----------------|------------------|----------------|------------------|----------------|------------------|----------------|------------------|
|     |                    |              |                 |                          | B <sub>2</sub>                          | B <sub>2</sub> F | B <sub>3</sub> | B <sub>3</sub> F | B <sub>2</sub> S | B <sub>2</sub> SF | Y <sub>1</sub> | Y <sub>1</sub> F | Y <sub>2</sub> | Y <sub>2</sub> F | Y <sub>3</sub> | Y <sub>3</sub> F | Y <sub>4</sub> | Y <sub>4</sub> F |
| 261 | Human Plasma exp_2 | 26631        | Haptoglobin     | VVLHPNYSQVDIGLIK_5_4_0_1 | 100.0                                   | 0.0              | 5.9            | 0.0              | 31.8             | 0.0               | 36.2           | 0.0              | 5.8            | 0.0              | 5.8            | 0.0              | 49.3           | 0.0              |
| 262 | Human Plasma exp_4 | 26593        | Haptoglobin     | VVLHPNYSQVDIGLIK_5_4_0_1 | 100.0                                   | 0.0              | 8.1            | 0.0              | 31.9             | 0.0               | 39.1           | 0.0              | 7.0            | 0.0              | 7.4            | 0.0              | 61.2           | 0.0              |
| 263 | Human Plasma exp_1 | 27827        | Haptoglobin     | VVLHPNYSQVDIGLIK_5_4_0_2 | 100.0                                   | 0.0              | 0.0            | 0.0              | 96.8             | 0.0               | 40.7           | 0.0              | 0.0            | 0.0              | 10.2           | 0.0              | 66.1           | 0.0              |
| 264 | Human Plasma exp_1 | 27945        | Haptoglobin     | VVLHPNYSQVDIGLIK_5_4_0_2 | 66.5                                    | 0.0              | 5.6            | 0.0              | 100.0            | 0.0               | 0.0            | 0.0              | 12.9           | 0.0              | 10.0           | 0.0              | 67.7           | 0.0              |
| 265 | Human Plasma exp_2 | 28700        | Haptoglobin     | VVLHPNYSQVDIGLIK_5_4_0_2 | 59.8                                    | 0.0              | 5.1            | 0.0              | 100.0            | 0.0               | 0.0            | 0.0              | 5.9            | 0.0              | 10.8           | 0.0              | 67.4           | 0.0              |
| 266 | Human Plasma exp_4 | 28201        | Haptoglobin     | VVLHPNYSQVDIGLIK_5_4_0_2 | 100.0                                   | 0.0              | 0.0            | 0.0              | 69.9             | 0.0               | 18.5           | 0.0              | 0.0            | 0.0              | 0.0            | 0.0              | 44.0           | 2.2              |
| 267 | Human Plasma exp_4 | 28408        | Haptoglobin     | VVLHPNYSQVDIGLIK_5_4_0_2 | 67.6                                    | 0.0              | 5.3            | 0.0              | 100.0            | 0.0               | 0.0            | 0.0              | 9.6            | 0.0              | 5.9            | 0.0              | 57.4           | 0.0              |
| 268 | Human Plasma exp_5 | 27613        | Haptoglobin     | VVLHPNYSQVDIGLIK_5_4_0_2 | 64.6                                    | 0.0              | 5.1            | 0.0              | 100.0            | 0.0               | 0.0            | 0.0              | 7.9            | 0.0              | 7.3            | 0.0              | 65.0           | 0.0              |
| 269 | Human Plasma exp_4 | 26569        | Haptoglobin     | VVLHPNYSQVDIGLIK_6_4_0_1 | 100.0                                   | 0.0              | 10.7           | 0.0              | 37.3             | 0.0               | 39.6           | 0.0              | 0.0            | 0.0              | 10.7           | 0.0              | 38.7           | 0.0              |
| 270 | Human Plasma exp_1 | 27654        | Haptoglobin     | VVLHPNYSQVDIGLIK_6_5_0_2 | 79.3                                    | 0.0              | 0.0            | 0.0              | 100.0            | 0.0               | 46.8           | 0.0              | 4.9            | 0.0              | 4.8            | 0.0              | 0.0            | 0.0              |
| 271 | Human Plasma exp_4 | 30252        | Haptoglobin     | VVLHPNYSQVDIGLIK_6_5_0_3 | 32.4                                    | 0.0              | 0.0            | 0.0              | 100.0            | 0.0               | 43.5           | 0.0              | 0.0            | 0.0              | 4.1            | 0.0              | 43.1           | 0.0              |
| 272 | Human Plasma exp_5 | 29222        | Haptoglobin     | VVLHPNYSQVDIGLIK_6_5_0_3 | 34.4                                    | 0.0              | 0.0            | 0.0              | 100.0            | 0.0               | 61.3           | 0.0              | 8.7            | 0.0              | 15.5           | 0.0              | 34.1           | 0.0              |
| 273 | Human Plasma exp_4 | 30058        | Haptoglobin     | VVLHPNYSQVDIGLIK_6_5_1_3 | 11.6                                    | 0.0              | 0.0            | 0.0              | 100.0            | 13.9              | 75.8           | 0.0              | 0.0            | 0.0              | 0.0            | 0.0              | 16.2           | 0.0              |
| 274 | Human Plasma exp_2 | 30831        | Hemopexin       | ALPQPQNVTSLLGCTH_4_3_0_1 | 25.6                                    | 0.0              | 0.0            | 0.0              | 57.9             | 0.0               | 75.1           | 0.0              | 0.0            | 0.0              | 19.5           | 0.0              | 100.0          | 0.0              |
| 275 | Human Plasma exp_3 | 30305        | Hemopexin       | ALPQPQNVTSLLGCTH_4_3_0_1 | 29.9                                    | 0.0              | 0.0            | 0.0              | 65.1             | 0.0               | 66.4           | 0.0              | 0.0            | 0.0              | 10.0           | 0.0              | 100.0          | 0.0              |
| 276 | Human Plasma exp_1 | 30204        | Hemopexin       | ALPQPQNVTSLLGCTH_5_4_0_2 | 36.8                                    | 0.0              | 0.0            | 0.0              | 100.0            | 0.0               | 49.9           | 0.0              | 5.6            | 0.0              | 9.4            | 0.0              | 66.2           | 0.0              |
| 277 | Human Plasma exp_2 | 30901        | Hemopexin       | ALPQPQNVTSLLGCTH_5_4_0_2 | 75.4                                    | 0.0              | 8.6            | 0.0              | 68.4             | 0.0               | 64.3           | 0.0              | 9.7            | 0.0              | 22.6           | 0.0              | 100.0          | 0.0              |
| 278 | Human Plasma exp_3 | 30491        | Hemopexin       | ALPQPQNVTSLLGCTH_5_4_0_2 | 54.8                                    | 0.0              | 4.8            | 0.0              | 100.0            | 0.0               | 36.7           | 0.0              | 3.3            | 0.0              | 12.5           | 0.0              | 55.7           | 0.0              |
| 279 | Human Plasma exp_4 | 30501        | Hemopexin       | ALPQPQNVTSLLGCTH_5_4_0_2 | 55.5                                    | 0.0              | 0.0            | 0.0              | 100.0            | 0.0               | 54.1           | 0.0              | 0.0            | 0.0              | 9.8            | 0.0              | 65.0           | 0.0              |
| 280 | Human Plasma exp_5 | 29783        | Hemopexin       | ALPQPQNVTSLLGCTH_5_4_0_2 | 48.3                                    | 0.0              | 0.0            | 0.0              | 100.0            | 0.0               | 36.2           | 0.0              | 0.0            | 0.0              | 11.6           | 0.0              | 93.4           | 0.0              |
| 281 | Human Plasma exp_1 | 22530        | Hemopexin       | SWPAVGNCSSALR_5_4_0_1    | 100.0                                   | 0.0              | 12.5           | 0.0              | 72.7             | 0.0               | 17.3           | 0.0              | 6.1            | 0.0              | 0.0            | 0.0              | 5.5            | 0.0              |
| 282 | Human Plasma exp_1 | 25393        | Hemopexin       | SWPAVGNCSSALR_5_4_0_2    | 74.6                                    | 0.0              | 9.0            | 0.0              | 100.0            | 0.0               | 50.5           | 0.0              | 0.0            | 0.0              | 0.0            | 0.0              | 74.6           | 0.0              |
| 283 | Human Plasma exp_2 | 25885        | Hemopexin       | SWPAVGNCSSALR_5_4_0_2    | 71.0                                    | 0.0              | 5.5            | 0.0              | 100.0            | 0.0               | 51.6           | 0.0              | 0.0            | 0.0              | 14.9           | 0.0              | 59.6           | 0.0              |
| 284 | Human Plasma exp_3 | 25563        | Hemopexin       | SWPAVGNCSSALR_5_4_0_2    | 77.7                                    | 0.0              | 6.8            | 0.0              | 100.0            | 0.0               | 52.7           | 0.0              | 0.0            | 0.0              | 0.0            | 0.0              | 72.2           | 0.0              |
| 285 | Human Plasma exp_4 | 25835        | Hemopexin       | SWPAVGNCSSALR_5_4_0_2    | 74.9                                    | 0.0              | 5.0            | 0.0              | 100.0            | 0.0               | 47.5           | 0.0              | 0.0            | 0.0              | 6.7            | 0.0              | 87.9           | 0.0              |
| 286 | Human Plasma exp_5 | 25332        | Hemopexin       | SWPAVGNCSSALR_5_4_0_2    | 51.3                                    | 0.0              | 0.0            | 0.0              | 100.0            | 0.0               | 46.8           | 0.0              | 0.0            | 0.0              | 4.0            | 0.0              | 48.8           | 0.0              |

**Supplementary Table 3. Continued.**

| No. | Experiments        | CID Scan No. | N-glycoproteins    | N-glycopeptides       | Relative intensities of B/Y series ions |                  |                |                  |                  |                   |                |                  |                |                  |                |                  |                |                  |
|-----|--------------------|--------------|--------------------|-----------------------|-----------------------------------------|------------------|----------------|------------------|------------------|-------------------|----------------|------------------|----------------|------------------|----------------|------------------|----------------|------------------|
|     |                    |              |                    |                       | B <sub>2</sub>                          | B <sub>2</sub> F | B <sub>3</sub> | B <sub>3</sub> F | B <sub>2</sub> S | B <sub>2</sub> SF | Y <sub>1</sub> | Y <sub>1</sub> F | Y <sub>2</sub> | Y <sub>2</sub> F | Y <sub>3</sub> | Y <sub>3</sub> F | Y <sub>4</sub> | Y <sub>4</sub> F |
| 287 | Human Plasma exp_2 | 25764        | Hemopexin          | SWPAVGNCSSALR_5_4_1_2 | 80.3                                    | 0.0              | 10.6           | 0.0              | 100.0            | 0.0               | 18.6           | 31.1             | 0.0            | 0.0              | 1.4            | 11.2             | 14.2           | 61.3             |
| 288 | Human Plasma exp_4 | 25753        | Hemopexin          | SWPAVGNCSSALR_5_4_1_2 | 81.3                                    | 0.0              | 3.8            | 0.0              | 100.0            | 0.0               | 14.4           | 27.5             | 0.0            | 0.0              | 0.0            | 0.0              | 12.2           | 56.2             |
| 289 | Human Plasma exp_5 | 24981        | Hemopexin          | SWPAVGNCSSALR_5_4_1_2 | 66.9                                    | 0.0              | 0.0            | 0.0              | 100.0            | 0.0               | 9.4            | 29.2             | 0.0            | 0.0              | 0.0            | 0.0              | 15.9           | 32.7             |
| 290 | Human Plasma exp_3 | 25158        | Hemopexin          | SWPAVGNCSSALR_6_5_0_2 | 81.0                                    | 0.0              | 0.0            | 0.0              | 100.0            | 0.0               | 36.5           | 0.0              | 5.1            | 0.0              | 0.0            | 0.0              | 24.0           | 0.0              |
| 291 | Human Plasma exp_4 | 28467        | Hemopexin          | SWPAVGNCSSALR_6_5_1_3 | 35.9                                    | 4.2              | 0.0            | 0.0              | 100.0            | 8.8               | 22.4           | 0.0              | 0.0            | 0.0              | 0.0            | 0.0              | 0.0            | 0.0              |
| 292 | Human Plasma exp_1 | 15042        | Heparin cofactor 2 | DFVNASSK_5_4_0_2      | 52.7                                    | 0.0              | 5.0            | 0.0              | 100.0            | 0.0               | 53.4           | 0.0              | 5.3            | 0.0              | 7.6            | 0.0              | 44.6           | 0.0              |
| 293 | Human Plasma exp_1 | 15007        | Heparin cofactor 2 | DFVNASSK_5_4_0_2      | 0.0                                     | 0.0              | 0.0            | 0.0              | 77.4             | 0.0               | 100.0          | 0.0              | 7.2            | 0.0              | 3.9            | 0.0              | 20.8           | 0.0              |
| 294 | Human Plasma exp_2 | 15333        | Heparin cofactor 2 | DFVNASSK_5_4_0_2      | 52.1                                    | 0.0              | 5.8            | 0.0              | 100.0            | 0.0               | 54.7           | 0.0              | 5.4            | 0.0              | 8.2            | 0.0              | 44.8           | 0.0              |
| 295 | Human Plasma exp_3 | 15064        | Heparin cofactor 2 | DFVNASSK_5_4_0_2      | 43.1                                    | 0.0              | 5.4            | 0.0              | 100.0            | 0.0               | 45.9           | 0.0              | 3.0            | 0.0              | 3.9            | 0.0              | 42.0           | 0.0              |
| 296 | Human Plasma exp_4 | 15380        | Heparin cofactor 2 | DFVNASSK_5_4_0_2      | 50.7                                    | 0.0              | 5.0            | 0.0              | 100.0            | 0.0               | 50.0           | 0.0              | 5.2            | 0.0              | 8.2            | 0.0              | 43.5           | 0.0              |
| 297 | Human Plasma exp_4 | 15384        | Heparin cofactor 2 | DFVNASSK_5_4_0_2      | 0.0                                     | 0.0              | 0.0            | 0.0              | 85.0             | 0.0               | 100.0          | 0.0              | 13.5           | 0.0              | 4.8            | 0.0              | 30.9           | 0.0              |
| 298 | Human Plasma exp_5 | 15145        | Heparin cofactor 2 | DFVNASSK_5_4_0_2      | 0.0                                     | 0.0              | 7.3            | 0.0              | 98.1             | 0.0               | 100.0          | 0.0              | 16.8           | 0.0              | 6.3            | 0.0              | 33.1           | 0.0              |
| 299 | Human Plasma exp_1 | 20220        | Heparin cofactor 2 | DFVNASSK_6_5_0_3      | 24.1                                    | 0.0              | 0.0            | 0.0              | 100.0            | 0.0               | 0.0            | 0.0              | 2.8            | 0.0              | 2.1            | 0.0              | 48.2           | 0.0              |
| 300 | Human Plasma exp_2 | 20659        | Heparin cofactor 2 | DFVNASSK_6_5_0_3      | 21.7                                    | 0.0              | 0.0            | 0.0              | 100.0            | 0.0               | 52.2           | 0.0              | 0.0            | 0.0              | 8.5            | 0.0              | 41.4           | 0.0              |
| 301 | Human Plasma exp_3 | 20040        | Heparin cofactor 2 | DFVNASSK_6_5_0_3      | 21.2                                    | 0.0              | 0.0            | 0.0              | 100.0            | 0.0               | 40.5           | 0.0              | 0.0            | 0.0              | 3.1            | 0.0              | 37.4           | 0.0              |
| 302 | Human Plasma exp_4 | 20540        | Heparin cofactor 2 | DFVNASSK_6_5_0_3      | 17.7                                    | 0.0              | 0.0            | 0.0              | 100.0            | 0.0               | 48.7           | 0.0              | 2.2            | 0.0              | 2.4            | 0.0              | 48.2           | 0.0              |
| 303 | Human Plasma exp_5 | 20269        | Heparin cofactor 2 | DFVNASSK_6_5_0_3      | 17.1                                    | 0.0              | 0.0            | 0.0              | 100.0            | 0.0               | 48.6           | 0.0              | 0.0            | 0.0              | 3.2            | 0.0              | 42.0           | 0.0              |
| 304 | Human Plasma exp_1 | 29227        | Heparin cofactor 2 | NLSMPLLPADFHK_5_4_0_2 | 72.6                                    | 0.0              | 0.0            | 0.0              | 100.0            | 0.0               | 30.1           | 0.0              | 0.0            | 0.0              | 8.3            | 0.0              | 72.9           | 0.0              |
| 305 | Human Plasma exp_2 | 29952        | Heparin cofactor 2 | NLSMPLLPADFHK_5_4_0_2 | 80.3                                    | 0.0              | 4.1            | 0.0              | 100.0            | 0.0               | 35.6           | 0.0              | 0.0            | 0.0              | 20.6           | 0.0              | 69.2           | 0.0              |
| 306 | Human Plasma exp_4 | 29698        | Heparin cofactor 2 | NLSMPLLPADFHK_5_4_0_2 | 67.7                                    | 0.0              | 3.9            | 0.0              | 100.0            | 0.0               | 42.4           | 0.0              | 2.9            | 0.0              | 8.9            | 0.0              | 72.4           | 0.0              |
| 307 | Human Plasma exp_5 | 28803        | Heparin cofactor 2 | NLSMPLLPADFHK_5_4_0_2 | 63.1                                    | 0.0              | 4.1            | 0.0              | 100.0            | 0.0               | 36.4           | 0.0              | 0.0            | 0.0              | 4.6            | 0.0              | 73.3           | 0.0              |
| 308 | Human Plasma exp_3 | 2935         | Heparin cofactor 2 | SMTNR_4_3_0_1         | 68.2                                    | 0.0              | 0.0            | 0.0              | 88.3             | 0.0               | 100.0          | 0.0              | 0.0            | 0.0              | 5.9            | 0.0              | 75.5           | 0.0              |
| 309 | Human Plasma exp_2 | 3065         | Heparin cofactor 2 | SMTNR_5_4_0_2         | 69.0                                    | 0.0              | 5.4            | 0.0              | 100.0            | 0.0               | 50.4           | 0.0              | 4.1            | 0.0              | 4.0            | 0.0              | 36.9           | 0.0              |
| 310 | Human Plasma exp_3 | 2996         | Heparin cofactor 2 | SMTNR_5_4_0_2         | 71.5                                    | 0.0              | 6.5            | 0.0              | 100.0            | 0.0               | 40.5           | 0.0              | 0.0            | 0.0              | 0.0            | 0.0              | 29.3           | 0.0              |
| 311 | Human Plasma exp_4 | 3050         | Heparin cofactor 2 | SMTNR_5_4_0_2         | 75.9                                    | 0.0              | 4.8            | 0.0              | 100.0            | 0.0               | 47.3           | 0.0              | 2.5            | 0.0              | 3.8            | 0.0              | 39.4           | 0.0              |
| 312 | Human Plasma exp_5 | 3015         | Heparin cofactor 2 | SMTNR_5_4_0_2         | 80.6                                    | 0.0              | 5.7            | 0.0              | 100.0            | 0.0               | 35.6           | 0.0              | 0.0            | 0.0              | 0.0            | 0.0              | 15.8           | 0.0              |



Supplementary Table 3. Continued.

| No. | Experiments        | CID Scan No. | N-glycoproteins                       | N-glycopeptides            | Relative intensities of B/Y series ions |                  |                |                  |                  |                   |                |                  |                |                  |                |                  |                |                  |
|-----|--------------------|--------------|---------------------------------------|----------------------------|-----------------------------------------|------------------|----------------|------------------|------------------|-------------------|----------------|------------------|----------------|------------------|----------------|------------------|----------------|------------------|
|     |                    |              |                                       |                            | B <sub>2</sub>                          | B <sub>2</sub> F | B <sub>3</sub> | B <sub>3</sub> F | B <sub>2</sub> S | B <sub>2</sub> SF | Y <sub>1</sub> | Y <sub>1</sub> F | Y <sub>2</sub> | Y <sub>2</sub> F | Y <sub>3</sub> | Y <sub>3</sub> F | Y <sub>4</sub> | Y <sub>4</sub> F |
| 313 | Human Plasma exp_4 | 24610        | Hepatocyte growth factor activator    | DSVSVVLGQHFFNR_5_4_0_2     | 68.1                                    | 0.0              | 0.0            | 0.0              | 98.3             | 0.0               | 100.0          | 0.0              | 0.0            | 0.0              | 11.3           | 0.0              | 57.6           | 0.0              |
| 314 | Human Plasma exp_2 | 12959        | Hepatocyte growth factor-like protein | GTANTTTAGVPCQR_5_4_0_2     | 57.3                                    | 0.0              | 5.6            | 0.0              | 100.0            | 0.0               | 58.1           | 0.0              | 0.0            | 0.0              | 4.3            | 0.0              | 51.9           | 0.0              |
| 315 | Human Plasma exp_5 | 12805        | Hepatocyte growth factor-like protein | GTANTTTAGVPCQR_5_4_0_2     | 68.5                                    | 0.0              | 0.0            | 0.0              | 100.0            | 0.0               | 28.5           | 0.0              | 0.0            | 0.0              | 5.4            | 0.0              | 53.7           | 0.0              |
| 316 | Human Plasma exp_1 | 26936        | Histidine-rich glycoprotein           | VIDFNCTSSVSSALANTK_5_4_0_1 | 100.0                                   | 0.0              | 5.6            | 0.0              | 46.7             | 0.0               | 36.7           | 0.0              | 4.6            | 2.1              | 19.3           | 0.0              | 78.4           | 0.0              |
| 317 | Human Plasma exp_2 | 27613        | Histidine-rich glycoprotein           | VIDFNCTSSVSSALANTK_5_4_0_1 | 100.0                                   | 0.0              | 0.0            | 0.0              | 51.2             | 0.0               | 49.9           | 0.0              | 0.0            | 0.0              | 12.2           | 0.0              | 85.0           | 0.0              |
| 318 | Human Plasma exp_3 | 27037        | Histidine-rich glycoprotein           | VIDFNCTSSVSSALANTK_5_4_0_1 | 100.0                                   | 0.0              | 9.7            | 0.0              | 43.9             | 0.0               | 39.7           | 0.0              | 4.9            | 0.0              | 0.0            | 0.0              | 67.1           | 0.0              |
| 319 | Human Plasma exp_4 | 27387        | Histidine-rich glycoprotein           | VIDFNCTSSVSSALANTK_5_4_0_1 | 51.0                                    | 0.0              | 12.7           | 0.0              | 52.8             | 0.0               | 37.6           | 0.0              | 0.0            | 0.0              | 13.7           | 0.0              | 100.0          | 0.0              |
| 320 | Human Plasma exp_5 | 26632        | Histidine-rich glycoprotein           | VIDFNCTSSVSSALANTK_5_4_0_1 | 89.1                                    | 0.0              | 0.0            | 0.0              | 68.3             | 0.0               | 38.7           | 0.0              | 0.0            | 0.0              | 18.3           | 0.0              | 100.0          | 0.0              |
| 321 | Human Plasma exp_5 | 26637        | Histidine-rich glycoprotein           | VIDFNCTSSVSSALANTK_5_4_0_1 | 17.3                                    | 0.0              | 0.0            | 0.0              | 100.0            | 0.0               | 78.3           | 0.0              | 10.4           | 0.0              | 0.0            | 0.0              | 54.2           | 0.0              |
| 322 | Human Plasma exp_1 | 28732        | Histidine-rich glycoprotein           | VIDFNCTSSVSSALANTK_5_4_0_2 | 57.2                                    | 0.0              | 0.0            | 0.0              | 100.0            | 0.0               | 67.5           | 0.0              | 8.9            | 0.0              | 17.0           | 0.0              | 77.1           | 0.0              |
| 323 | Human Plasma exp_2 | 29468        | Histidine-rich glycoprotein           | VIDFNCTSSVSSALANTK_5_4_0_2 | 69.3                                    | 0.0              | 0.0            | 0.0              | 100.0            | 0.0               | 86.0           | 0.0              | 0.0            | 0.0              | 12.9           | 0.0              | 54.1           | 0.0              |
| 324 | Human Plasma exp_3 | 28937        | Histidine-rich glycoprotein           | VIDFNCTSSVSSALANTK_5_4_0_2 | 49.7                                    | 0.0              | 0.0            | 0.0              | 100.0            | 0.0               | 69.3           | 0.0              | 3.5            | 0.0              | 0.0            | 0.0              | 67.1           | 0.0              |
| 325 | Human Plasma exp_4 | 29242        | Histidine-rich glycoprotein           | VIDFNCTSSVSSALANTK_5_4_0_2 | 59.4                                    | 0.0              | 4.9            | 0.0              | 100.0            | 0.0               | 62.4           | 0.0              | 7.8            | 0.0              | 23.8           | 0.0              | 82.9           | 0.0              |
| 326 | Human Plasma exp_5 | 28374        | Histidine-rich glycoprotein           | VIDFNCTSSVSSALANTK_5_4_0_2 | 55.3                                    | 0.0              | 0.0            | 0.0              | 100.0            | 0.0               | 74.1           | 0.0              | 6.2            | 0.0              | 8.9            | 0.0              | 45.1           | 0.0              |
| 327 | Human Plasma exp_5 | 17358        | ICOS ligand                           | LFNVTPQDEQK_5_5_1_1        | 100.0                                   | 0.0              | 12.5           | 0.0              | 60.2             | 0.0               | 0.0            | 0.0              | 25.8           | 25.6             | 0.0            | 0.0              | 0.0            | 0.0              |
| 328 | Human Plasma exp_1 | 20768        | ICOS ligand                           | LFNVTPQDEQK_5_5_1_2        | 14.7                                    | 0.0              | 0.0            | 0.0              | 100.0            | 0.0               | 8.4            | 0.0              | 54.3           | 30.8             | 0.0            | 0.0              | 0.0            | 0.0              |
| 329 | Human Plasma exp_4 | 21096        | ICOS ligand                           | LFNVTPQDEQK_5_5_1_2        | 59.8                                    | 0.0              | 3.2            | 0.0              | 100.0            | 2.8               | 0.0            | 0.0              | 37.1           | 14.2             | 0.0            | 0.0              | 0.0            | 0.0              |
| 330 | Human Plasma exp_4 | 21041        | ICOS ligand                           | LFNVTPQDEQK_5_5_1_2        | 9.8                                     | 0.0              | 8.2            | 0.0              | 100.0            | 0.0               | 0.0            | 0.0              | 46.3           | 9.1              | 0.0            | 0.0              | 0.0            | 0.0              |
| 331 | Human Plasma exp_1 | 15025        | Ig alpha-2 chain C region             | TPLTANITK_5_4_1_1          | 100.0                                   | 0.0              | 10.1           | 0.0              | 81.5             | 0.0               | 11.3           | 32.1             | 0.0            | 0.0              | 0.0            | 0.0              | 0.0            | 0.0              |
| 332 | Human Plasma exp_2 | 15335        | Ig alpha-2 chain C region             | TPLTANITK_5_4_1_1          | 100.0                                   | 0.0              | 5.0            | 0.0              | 87.5             | 0.0               | 8.1            | 29.1             | 0.0            | 0.0              | 0.0            | 0.0              | 0.0            | 0.0              |
| 333 | Human Plasma exp_3 | 14878        | Ig alpha-2 chain C region             | TPLTANITK_5_4_1_1          | 0.0                                     | 0.0              | 4.6            | 0.0              | 22.3             | 0.0               | 54.2           | 100.0            | 0.0            | 0.0              | 3.7            | 15.7             | 18.3           | 58.0             |
| 334 | Human Plasma exp_4 | 15175        | Ig alpha-2 chain C region             | TPLTANITK_5_4_1_1          | 0.0                                     | 0.0              | 0.0            | 0.0              | 29.8             | 0.0               | 40.5           | 100.0            | 0.0            | 0.0              | 0.0            | 0.0              | 17.3           | 77.5             |
| 335 | Human Plasma exp_3 | 18898        | Ig alpha-2 chain C region             | TPLTANITK_5_4_1_2          | 0.0                                     | 0.0              | 0.0            | 0.0              | 83.2             | 0.0               | 71.4           | 100.0            | 0.0            | 0.0              | 0.0            | 0.0              | 7.7            | 68.4             |
| 336 | Human Plasma exp_3 | 15007        | Ig alpha-2 chain C region             | TPLTANITK_5_5_1_1          | 100.0                                   | 0.0              | 5.5            | 0.0              | 55.0             | 0.0               | 3.7            | 5.1              | 0.0            | 0.0              | 0.0            | 0.0              | 0.0            | 0.0              |
| 337 | Human Plasma exp_3 | 14995        | Ig alpha-2 chain C region             | TPLTANITK_5_5_1_1          | 0.0                                     | 0.0              | 0.0            | 0.0              | 48.2             | 0.0               | 56.3           | 100.0            | 26.2           | 53.7             | 0.0            | 0.0              | 0.0            | 0.0              |
| 338 | Human Plasma exp_4 | 15325        | Ig alpha-2 chain C region             | TPLTANITK_5_5_1_1          | 100.0                                   | 0.0              | 5.9            | 0.0              | 47.3             | 0.0               | 2.8            | 5.3              | 0.0            | 0.0              | 0.0            | 0.0              | 0.0            | 0.0              |

Supplementary Table 3. Continued.

| No. | Experiments        | CID Scan No. | N-glycoproteins           | N-glycopeptides   | Relative intensities of B/Y series ions |                  |                |                  |                  |                   |                |                  |                |                  |                |                  |                |                  |
|-----|--------------------|--------------|---------------------------|-------------------|-----------------------------------------|------------------|----------------|------------------|------------------|-------------------|----------------|------------------|----------------|------------------|----------------|------------------|----------------|------------------|
|     |                    |              |                           |                   | B <sub>2</sub>                          | B <sub>2</sub> F | B <sub>3</sub> | B <sub>3</sub> F | B <sub>2</sub> S | B <sub>2</sub> SF | Y <sub>1</sub> | Y <sub>1</sub> F | Y <sub>2</sub> | Y <sub>2</sub> F | Y <sub>3</sub> | Y <sub>3</sub> F | Y <sub>4</sub> | Y <sub>4</sub> F |
| 339 | Human Plasma exp_4 | 15315        | Ig alpha-2 chain C region | TPLTANITK_5_5_1_1 | 0.0                                     | 0.0              | 0.0            | 0.0              | 34.3             | 0.0               | 45.4           | 100.0            | 11.2           | 55.3             | 0.0            | 0.0              | 0.0            | 0.0              |
| 340 | Human Plasma exp_3 | 18979        | Ig alpha-2 chain C region | TPLTANITK_5_5_1_2 | 72.2                                    | 0.0              | 3.9            | 0.0              | 100.0            | 0.0               | 3.7            | 2.4              | 0.0            | 0.0              | 0.0            | 0.0              | 0.0            | 0.0              |
| 341 | Human Plasma exp_1 | 5651         | Ig gamma-1 chain C region | EEQYNSTYR_3_3_0_0 | 9.4                                     | 0.0              | 7.0            | 0.0              | 0.0              | 0.0               | 100.0          | 0.0              | 14.0           | 0.0              | 13.6           | 0.0              | 45.5           | 0.0              |
| 342 | Human Plasma exp_2 | 5984         | Ig gamma-1 chain C region | EEQYNSTYR_3_3_0_0 | 6.9                                     | 0.0              | 8.8            | 0.0              | 0.0              | 0.0               | 100.0          | 0.0              | 6.9            | 0.0              | 16.1           | 0.0              | 48.6           | 0.0              |
| 343 | Human Plasma exp_3 | 5945         | Ig gamma-1 chain C region | EEQYNSTYR_3_3_0_0 | 10.9                                    | 0.0              | 10.1           | 0.0              | 0.0              | 0.0               | 100.0          | 0.0              | 11.4           | 0.0              | 8.4            | 0.0              | 41.1           | 0.0              |
| 344 | Human Plasma exp_4 | 5801         | Ig gamma-1 chain C region | EEQYNSTYR_3_3_0_0 | 9.8                                     | 0.0              | 8.5            | 0.0              | 0.0              | 0.0               | 100.0          | 0.0              | 13.8           | 0.0              | 18.6           | 0.0              | 43.3           | 0.0              |
| 345 | Human Plasma exp_5 | 5913         | Ig gamma-1 chain C region | EEQYNSTYR_3_3_0_0 | 6.0                                     | 0.0              | 8.6            | 0.0              | 0.0              | 0.0               | 100.0          | 0.0              | 6.3            | 0.0              | 16.6           | 0.0              | 42.6           | 0.0              |
| 346 | Human Plasma exp_1 | 4903         | Ig gamma-1 chain C region | EEQYNSTYR_3_3_1_0 | 7.4                                     | 0.0              | 10.1           | 0.0              | 0.0              | 0.0               | 100.0          | 84.8             | 7.9            | 0.0              | 18.9           | 3.2              | 64.2           | 13.4             |
| 347 | Human Plasma exp_2 | 5416         | Ig gamma-1 chain C region | EEQYNSTYR_3_3_1_0 | 28.9                                    | 0.0              | 9.3            | 0.0              | 0.0              | 0.0               | 100.0          | 82.0             | 4.4            | 0.0              | 30.4           | 20.5             | 76.7           | 20.1             |
| 348 | Human Plasma exp_3 | 5245         | Ig gamma-1 chain C region | EEQYNSTYR_3_3_1_0 | 19.5                                    | 0.0              | 0.0            | 0.0              | 0.0              | 0.0               | 67.8           | 100.0            | 0.0            | 0.0              | 12.6           | 7.9              | 44.2           | 23.8             |
| 349 | Human Plasma exp_4 | 5932         | Ig gamma-1 chain C region | EEQYNSTYR_3_3_1_0 | 8.3                                     | 0.0              | 16.3           | 0.0              | 0.0              | 0.0               | 100.0          | 70.6             | 18.4           | 0.0              | 21.6           | 7.7              | 40.2           | 20.8             |
| 350 | Human Plasma exp_1 | 5791         | Ig gamma-1 chain C region | EEQYNSTYR_3_4_0_0 | 3.1                                     | 0.0              | 8.9            | 0.0              | 0.0              | 0.0               | 100.0          | 0.0              | 17.0           | 0.0              | 15.8           | 0.0              | 37.9           | 0.0              |
| 351 | Human Plasma exp_2 | 5966         | Ig gamma-1 chain C region | EEQYNSTYR_3_4_0_0 | 2.8                                     | 0.0              | 8.7            | 0.0              | 0.0              | 0.0               | 100.0          | 0.0              | 18.6           | 0.0              | 17.2           | 0.0              | 41.4           | 0.0              |
| 352 | Human Plasma exp_4 | 5765         | Ig gamma-1 chain C region | EEQYNSTYR_3_4_0_0 | 3.3                                     | 0.0              | 7.7            | 0.0              | 0.0              | 0.0               | 100.0          | 0.0              | 17.7           | 0.0              | 18.3           | 0.0              | 34.9           | 0.0              |
| 353 | Human Plasma exp_1 | 5706         | Ig gamma-1 chain C region | EEQYNSTYR_3_4_1_0 | 0.0                                     | 0.0              | 7.1            | 0.0              | 0.0              | 0.0               | 100.0          | 53.6             | 17.9           | 5.3              | 15.7           | 0.0              | 23.7           | 6.4              |
| 354 | Human Plasma exp_2 | 5595         | Ig gamma-1 chain C region | EEQYNSTYR_3_4_1_0 | 0.0                                     | 0.0              | 13.6           | 0.0              | 0.0              | 0.0               | 100.0          | 57.0             | 17.4           | 6.2              | 13.1           | 0.0              | 30.3           | 19.4             |
| 355 | Human Plasma exp_3 | 5880         | Ig gamma-1 chain C region | EEQYNSTYR_3_4_1_0 | 0.0                                     | 0.0              | 7.9            | 0.0              | 0.0              | 0.0               | 100.0          | 52.8             | 17.1           | 5.2              | 15.1           | 0.0              | 23.4           | 6.5              |
| 356 | Human Plasma exp_4 | 6195         | Ig gamma-1 chain C region | EEQYNSTYR_3_4_1_0 | 0.0                                     | 0.0              | 0.0            | 0.0              | 0.0              | 0.0               | 100.0          | 66.9             | 3.6            | 0.0              | 0.0            | 0.0              | 18.7           | 7.3              |
| 357 | Human Plasma exp_5 | 5784         | Ig gamma-1 chain C region | EEQYNSTYR_3_4_1_0 | 0.0                                     | 0.0              | 7.5            | 0.0              | 0.0              | 0.0               | 100.0          | 53.4             | 18.1           | 5.4              | 14.9           | 0.0              | 24.8           | 6.9              |
| 358 | Human Plasma exp_1 | 5580         | Ig gamma-1 chain C region | EEQYNSTYR_4_3_0_0 | 17.3                                    | 0.0              | 7.0            | 0.0              | 0.0              | 0.0               | 100.0          | 0.0              | 10.8           | 0.0              | 9.0            | 0.0              | 39.6           | 0.0              |
| 359 | Human Plasma exp_2 | 5693         | Ig gamma-1 chain C region | EEQYNSTYR_4_3_0_0 | 14.7                                    | 0.0              | 7.3            | 0.0              | 0.0              | 0.0               | 100.0          | 0.0              | 4.5            | 0.0              | 5.4            | 0.0              | 37.4           | 0.0              |
| 360 | Human Plasma exp_3 | 5646         | Ig gamma-1 chain C region | EEQYNSTYR_4_3_0_0 | 15.4                                    | 0.0              | 5.6            | 0.0              | 0.0              | 0.0               | 100.0          | 0.0              | 6.3            | 0.0              | 6.5            | 0.0              | 39.5           | 0.0              |
| 361 | Human Plasma exp_4 | 5772         | Ig gamma-1 chain C region | EEQYNSTYR_4_3_0_0 | 15.1                                    | 0.0              | 5.8            | 0.0              | 0.0              | 0.0               | 100.0          | 0.0              | 6.9            | 0.0              | 7.3            | 0.0              | 35.2           | 0.0              |
| 362 | Human Plasma exp_5 | 5618         | Ig gamma-1 chain C region | EEQYNSTYR_4_3_0_0 | 14.6                                    | 0.0              | 5.4            | 0.0              | 0.0              | 0.0               | 100.0          | 0.0              | 8.6            | 0.0              | 7.8            | 0.0              | 23.0           | 0.0              |
| 363 | Human Plasma exp_1 | 5687         | Ig gamma-1 chain C region | EEQYNSTYR_4_3_1_0 | 11.2                                    | 4.1              | 11.5           | 0.0              | 0.0              | 0.0               | 100.0          | 90.2             | 11.6           | 3.8              | 8.4            | 0.0              | 42.0           | 8.0              |
| 364 | Human Plasma exp_2 | 5992         | Ig gamma-1 chain C region | EEQYNSTYR_4_3_1_0 | 12.1                                    | 4.1              | 7.1            | 0.0              | 0.0              | 0.0               | 100.0          | 83.5             | 3.3            | 0.0              | 4.7            | 0.0              | 31.6           | 3.5              |

Supplementary Table 3. Continued.

| No. | Experiments        | CID Scan No. | N-glycoproteins           | N-glycopeptides   | Relative intensities of B/Y series ions |                  |                |                  |                  |                   |                |                  |                |                  |                |                  |                |                  |
|-----|--------------------|--------------|---------------------------|-------------------|-----------------------------------------|------------------|----------------|------------------|------------------|-------------------|----------------|------------------|----------------|------------------|----------------|------------------|----------------|------------------|
|     |                    |              |                           |                   | B <sub>2</sub>                          | B <sub>2</sub> F | B <sub>3</sub> | B <sub>3</sub> F | B <sub>2</sub> S | B <sub>2</sub> SF | Y <sub>1</sub> | Y <sub>1</sub> F | Y <sub>2</sub> | Y <sub>2</sub> F | Y <sub>3</sub> | Y <sub>3</sub> F | Y <sub>4</sub> | Y <sub>4</sub> F |
| 365 | Human Plasma exp_3 | 5972         | Ig gamma-1 chain C region | EEQYNSTYR_4_3_1_0 | 6.9                                     | 0.0              | 7.2            | 0.0              | 0.0              | 0.0               | 100.0          | 96.2             | 1.8            | 0.0              | 2.3            | 0.0              | 32.3           | 5.0              |
| 366 | Human Plasma exp_5 | 5753         | Ig gamma-1 chain C region | EEQYNSTYR_4_3_1_0 | 8.7                                     | 4.1              | 11.1           | 0.0              | 0.0              | 0.0               | 100.0          | 88.4             | 11.4           | 6.2              | 11.6           | 5.3              | 38.2           | 7.9              |
| 367 | Human Plasma exp_1 | 9068         | Ig gamma-1 chain C region | EEQYNSTYR_4_3_1_1 | 0.0                                     | 0.0              | 9.7            | 0.0              | 33.9             | 0.0               | 100.0          | 61.2             | 0.0            | 0.0              | 5.5            | 0.0              | 39.5           | 0.0              |
| 368 | Human Plasma exp_2 | 9215         | Ig gamma-1 chain C region | EEQYNSTYR_4_3_1_1 | 0.0                                     | 0.0              | 0.0            | 0.0              | 28.4             | 0.0               | 100.0          | 99.4             | 7.9            | 7.0              | 0.0            | 0.0              | 28.7           | 0.0              |
| 369 | Human Plasma exp_3 | 9230         | Ig gamma-1 chain C region | EEQYNSTYR_4_3_1_1 | 83.0                                    | 0.0              | 14.7           | 0.0              | 100.0            | 0.0               | 30.8           | 21.1             | 0.0            | 0.0              | 0.0            | 0.0              | 0.0            | 0.0              |
| 370 | Human Plasma exp_3 | 8948         | Ig gamma-1 chain C region | EEQYNSTYR_4_3_1_1 | 0.0                                     | 0.0              | 0.0            | 0.0              | 21.0             | 0.0               | 100.0          | 96.9             | 0.0            | 0.0              | 12.5           | 0.0              | 54.9           | 0.0              |
| 371 | Human Plasma exp_4 | 9278         | Ig gamma-1 chain C region | EEQYNSTYR_4_3_1_1 | 0.0                                     | 0.0              | 4.5            | 0.0              | 34.5             | 0.0               | 69.5           | 100.0            | 0.0            | 0.0              | 0.0            | 0.0              | 48.2           | 0.0              |
| 372 | Human Plasma exp_5 | 9233         | Ig gamma-1 chain C region | EEQYNSTYR_4_3_1_1 | 83.5                                    | 0.0              | 0.0            | 0.0              | 100.0            | 0.0               | 26.9           | 7.5              | 0.0            | 0.0              | 9.5            | 0.0              | 0.0            | 0.0              |
| 373 | Human Plasma exp_5 | 9174         | Ig gamma-1 chain C region | EEQYNSTYR_4_3_1_1 | 0.0                                     | 0.0              | 8.2            | 0.0              | 28.1             | 0.0               | 100.0          | 91.6             | 5.8            | 4.1              | 0.0            | 0.0              | 62.1           | 0.0              |
| 374 | Human Plasma exp_3 | 5448         | Ig gamma-1 chain C region | EEQYNSTYR_4_4_0_0 | 0.0                                     | 0.0              | 7.4            | 0.0              | 0.0              | 0.0               | 100.0          | 0.0              | 10.4           | 0.0              | 5.1            | 0.0              | 21.2           | 0.0              |
| 375 | Human Plasma exp_5 | 5420         | Ig gamma-1 chain C region | EEQYNSTYR_4_4_0_0 | 0.0                                     | 0.0              | 4.1            | 0.0              | 0.0              | 0.0               | 100.0          | 0.0              | 8.5            | 0.0              | 4.3            | 0.0              | 15.5           | 0.0              |
| 376 | Human Plasma exp_1 | 5611         | Ig gamma-1 chain C region | EEQYNSTYR_4_4_1_0 | 100.0                                   | 0.0              | 0.0            | 0.0              | 0.0              | 0.0               | 32.8           | 41.5             | 0.0            | 0.0              | 0.0            | 0.0              | 19.6           | 40.1             |
| 377 | Human Plasma exp_1 | 4872         | Ig gamma-1 chain C region | EEQYNSTYR_4_4_1_0 | 0.0                                     | 0.0              | 5.9            | 0.0              | 0.0              | 0.0               | 1.6            | 100.0            | 11.8           | 8.1              | 12.2           | 0.0              | 27.4           | 5.7              |
| 378 | Human Plasma exp_2 | 6129         | Ig gamma-1 chain C region | EEQYNSTYR_4_4_1_0 | 0.0                                     | 0.0              | 4.5            | 0.0              | 0.0              | 0.0               | 6.9            | 100.0            | 13.4           | 11.6             | 4.7            | 0.0              | 29.3           | 10.0             |
| 379 | Human Plasma exp_3 | 5899         | Ig gamma-1 chain C region | EEQYNSTYR_4_4_1_0 | 100.0                                   | 0.0              | 0.0            | 0.0              | 0.0              | 0.0               | 30.1           | 36.9             | 0.0            | 0.0              | 0.0            | 0.0              | 19.4           | 40.9             |
| 380 | Human Plasma exp_3 | 4946         | Ig gamma-1 chain C region | EEQYNSTYR_4_4_1_0 | 0.0                                     | 0.0              | 15.0           | 0.0              | 0.0              | 0.0               | 8.5            | 100.0            | 10.5           | 5.4              | 13.5           | 3.2              | 29.8           | 3.5              |
| 381 | Human Plasma exp_4 | 6207         | Ig gamma-1 chain C region | EEQYNSTYR_4_4_1_0 | 0.0                                     | 0.0              | 6.3            | 0.0              | 7.4              | 0.0               | 4.7            | 100.0            | 5.6            | 0.0              | 3.4            | 0.0              | 11.4           | 0.0              |
| 382 | Human Plasma exp_5 | 5715         | Ig gamma-1 chain C region | EEQYNSTYR_4_4_1_0 | 100.0                                   | 0.0              | 0.0            | 0.0              | 0.0              | 0.0               | 31.5           | 38.9             | 0.0            | 0.0              | 0.0            | 0.0              | 18.7           | 38.2             |
| 383 | Human Plasma exp_1 | 9178         | Ig gamma-1 chain C region | EEQYNSTYR_4_4_1_1 | 55.0                                    | 0.0              | 10.4           | 0.0              | 100.0            | 0.0               | 51.8           | 43.5             | 0.0            | 0.0              | 0.0            | 0.0              | 23.0           | 21.8             |
| 384 | Human Plasma exp_1 | 9252         | Ig gamma-1 chain C region | EEQYNSTYR_4_4_1_1 | 0.0                                     | 0.0              | 6.7            | 0.0              | 15.5             | 0.0               | 100.0          | 0.0              | 14.0           | 12.6             | 10.6           | 8.1              | 37.0           | 3.2              |
| 385 | Human Plasma exp_2 | 9369         | Ig gamma-1 chain C region | EEQYNSTYR_4_4_1_1 | 58.5                                    | 0.0              | 13.1           | 0.0              | 100.0            | 0.0               | 55.0           | 43.8             | 0.0            | 0.0              | 0.0            | 0.0              | 26.2           | 26.4             |
| 386 | Human Plasma exp_3 | 9342         | Ig gamma-1 chain C region | EEQYNSTYR_4_4_1_1 | 63.4                                    | 0.0              | 14.0           | 0.0              | 100.0            | 0.0               | 61.2           | 47.5             | 0.0            | 0.0              | 0.0            | 0.0              | 29.5           | 30.4             |
| 387 | Human Plasma exp_3 | 9412         | Ig gamma-1 chain C region | EEQYNSTYR_4_4_1_1 | 0.0                                     | 0.0              | 0.0            | 0.0              | 21.6             | 0.0               | 100.0          | 0.0              | 9.0            | 5.0              | 0.0            | 0.0              | 30.2           | 0.0              |
| 388 | Human Plasma exp_4 | 9262         | Ig gamma-1 chain C region | EEQYNSTYR_4_4_1_1 | 0.0                                     | 0.0              | 0.0            | 0.0              | 25.1             | 0.0               | 100.0          | 0.0              | 3.2            | 0.0              | 9.4            | 0.0              | 22.4           | 0.0              |
| 389 | Human Plasma exp_5 | 9379         | Ig gamma-1 chain C region | EEQYNSTYR_4_4_1_1 | 0.0                                     | 0.0              | 6.2            | 0.0              | 18.2             | 0.0               | 100.0          | 0.0              | 7.6            | 13.3             | 14.5           | 0.0              | 33.1           | 4.7              |
| 390 | Human Plasma exp_2 | 6300         | Ig gamma-1 chain C region | EEQYNSTYR_4_5_1_0 | 0.0                                     | 0.0              | 0.0            | 0.0              | 0.0              | 0.0               | 100.0          | 99.7             | 18.8           | 12.4             | 3.6            | 0.0              | 0.0            | 0.0              |

**Supplementary Table 3. Continued.**

| No. | Experiments        | CID Scan No. | N-glycoproteins           | N-glycopeptides   | Relative intensities of B/Y series ions |                  |                |                  |                  |                   |                |                  |                |                  |                |                  |                |                  |
|-----|--------------------|--------------|---------------------------|-------------------|-----------------------------------------|------------------|----------------|------------------|------------------|-------------------|----------------|------------------|----------------|------------------|----------------|------------------|----------------|------------------|
|     |                    |              |                           |                   | B <sub>2</sub>                          | B <sub>2</sub> F | B <sub>3</sub> | B <sub>3</sub> F | B <sub>2</sub> S | B <sub>2</sub> SF | Y <sub>1</sub> | Y <sub>1</sub> F | Y <sub>2</sub> | Y <sub>2</sub> F | Y <sub>3</sub> | Y <sub>3</sub> F | Y <sub>4</sub> | Y <sub>4</sub> F |
| 391 | Human Plasma exp_4 | 6672         | Ig gamma-1 chain C region | EEQYNSTYR_4_5_1_0 | 0.0                                     | 0.0              | 4.1            | 0.0              | 0.0              | 0.0               | 100.0          | 87.2             | 31.8           | 20.8             | 9.4            | 3.0              | 7.0            | 0.0              |
| 392 | Human Plasma exp_5 | 6286         | Ig gamma-1 chain C region | EEQYNSTYR_4_5_1_0 | 0.0                                     | 0.0              | 0.0            | 0.0              | 0.0              | 0.0               | 100.0          | 80.7             | 21.0           | 20.9             | 0.0            | 0.0              | 3.3            | 0.0              |
| 393 | Human Plasma exp_1 | 8778         | Ig gamma-1 chain C region | EEQYNSTYR_5_3_1_1 | 67.4                                    | 0.0              | 0.0            | 0.0              | 100.0            | 0.0               | 6.3            | 0.0              | 0.0            | 0.0              | 0.0            | 0.0              | 8.1            | 27.7             |
| 394 | Human Plasma exp_2 | 8934         | Ig gamma-1 chain C region | EEQYNSTYR_5_3_1_1 | 93.2                                    | 0.0              | 0.0            | 0.0              | 100.0            | 0.0               | 8.1            | 10.9             | 0.0            | 0.0              | 0.0            | 0.0              | 8.5            | 10.4             |
| 395 | Human Plasma exp_3 | 8958         | Ig gamma-1 chain C region | EEQYNSTYR_5_3_1_1 | 100.0                                   | 0.0              | 0.0            | 0.0              | 95.3             | 0.0               | 7.2            | 24.1             | 5.4            | 0.0              | 0.0            | 0.0              | 0.0            | 0.0              |
| 396 | Human Plasma exp_2 | 5454         | Ig gamma-1 chain C region | EEQYNSTYR_5_4_0_0 | 0.0                                     | 0.0              | 4.6            | 0.0              | 0.0              | 0.0               | 100.0          | 0.0              | 9.5            | 0.0              | 6.4            | 0.0              | 17.1           | 0.0              |
| 397 | Human Plasma exp_1 | 9244         | Ig gamma-1 chain C region | EEQYNSTYR_5_4_0_1 | 0.0                                     | 0.0              | 0.0            | 0.0              | 20.6             | 0.0               | 100.0          | 0.0              | 7.2            | 0.0              | 4.9            | 0.0              | 20.3           | 0.0              |
| 398 | Human Plasma exp_3 | 9198         | Ig gamma-1 chain C region | EEQYNSTYR_5_4_0_1 | 0.0                                     | 0.0              | 3.3            | 0.0              | 14.2             | 0.0               | 100.0          | 0.0              | 8.5            | 0.0              | 3.3            | 0.0              | 25.7           | 0.0              |
| 399 | Human Plasma exp_1 | 5809         | Ig gamma-1 chain C region | EEQYNSTYR_5_4_1_0 | 0.0                                     | 0.0              | 0.0            | 0.0              | 0.0              | 0.0               | 100.0          | 94.4             | 11.5           | 5.4              | 4.1            | 0.0              | 12.5           | 0.0              |
| 400 | Human Plasma exp_2 | 5741         | Ig gamma-1 chain C region | EEQYNSTYR_5_4_1_0 | 0.0                                     | 2.9              | 7.1            | 0.0              | 0.0              | 0.0               | 99.7           | 100.0            | 18.4           | 16.8             | 18.6           | 10.4             | 35.1           | 3.7              |
| 401 | Human Plasma exp_4 | 5782         | Ig gamma-1 chain C region | EEQYNSTYR_5_4_1_0 | 0.0                                     | 2.9              | 6.8            | 0.0              | 0.0              | 0.0               | 100.0          | 96.7             | 17.8           | 15.3             | 15.6           | 8.9              | 32.4           | 3.0              |
| 402 | Human Plasma exp_1 | 8799         | Ig gamma-1 chain C region | EEQYNSTYR_5_4_1_1 | 0.0                                     | 0.0              | 12.3           | 0.0              | 32.5             | 0.0               | 91.0           | 100.0            | 9.3            | 13.2             | 9.0            | 9.7              | 13.0           | 0.0              |
| 403 | Human Plasma exp_2 | 9326         | Ig gamma-1 chain C region | EEQYNSTYR_5_4_1_1 | 0.0                                     | 2.9              | 3.8            | 0.0              | 19.1             | 0.0               | 93.3           | 100.0            | 7.3            | 12.4             | 9.4            | 6.4              | 26.5           | 0.0              |
| 404 | Human Plasma exp_3 | 9160         | Ig gamma-1 chain C region | EEQYNSTYR_5_4_1_1 | 100.0                                   | 0.0              | 8.4            | 0.0              | 43.6             | 0.0               | 10.4           | 11.3             | 0.0            | 0.0              | 0.0            | 0.0              | 0.0            | 0.0              |
| 405 | Human Plasma exp_3 | 9256         | Ig gamma-1 chain C region | EEQYNSTYR_5_4_1_1 | 0.0                                     | 0.0              | 11.9           | 0.0              | 34.9             | 0.0               | 100.0          | 92.1             | 15.6           | 12.2             | 0.0            | 0.0              | 15.0           | 0.0              |
| 406 | Human Plasma exp_4 | 9273         | Ig gamma-1 chain C region | EEQYNSTYR_5_4_1_1 | 100.0                                   | 0.0              | 3.4            | 0.0              | 39.9             | 0.0               | 4.8            | 10.2             | 0.0            | 0.0              | 0.0            | 0.0              | 12.2           | 35.9             |
| 407 | Human Plasma exp_4 | 8887         | Ig gamma-1 chain C region | EEQYNSTYR_5_4_1_1 | 100.0                                   | 0.0              | 0.0            | 0.0              | 88.1             | 0.0               | 15.1           | 8.7              | 0.0            | 0.0              | 0.0            | 0.0              | 5.3            | 0.0              |
| 408 | Human Plasma exp_4 | 9393         | Ig gamma-1 chain C region | EEQYNSTYR_5_4_1_1 | 0.0                                     | 0.0              | 5.4            | 0.0              | 13.6             | 0.0               | 98.4           | 100.0            | 10.4           | 5.4              | 8.4            | 6.1              | 14.9           | 0.0              |
| 409 | Human Plasma exp_5 | 9296         | Ig gamma-1 chain C region | EEQYNSTYR_5_4_1_1 | 0.0                                     | 0.0              | 9.3            | 0.0              | 16.1             | 0.0               | 90.4           | 100.0            | 10.6           | 14.6             | 0.0            | 0.0              | 29.5           | 0.0              |
| 410 | Human Plasma exp_1 | 12580        | Ig gamma-1 chain C region | EEQYNSTYR_5_4_1_2 | 26.1                                    | 0.0              | 0.0            | 0.0              | 100.0            | 0.0               | 9.2            | 12.0             | 0.0            | 0.0              | 0.0            | 0.0              | 1.7            | 2.3              |
| 411 | Human Plasma exp_2 | 13332        | Ig gamma-1 chain C region | EEQYNSTYR_5_4_1_2 | 39.8                                    | 0.0              | 0.0            | 0.0              | 100.0            | 0.0               | 10.7           | 21.2             | 0.0            | 0.0              | 0.0            | 0.0              | 3.1            | 0.0              |
| 412 | Human Plasma exp_1 | 5106         | Ig gamma-1 chain C region | EEQYNSTYR_5_4_2_0 | 100.0                                   | 38.1             | 12.6           | 0.0              | 14.0             | 0.0               | 10.0           | 17.0             | 0.0            | 0.0              | 0.0            | 0.0              | 0.0            | 0.0              |
| 413 | Human Plasma exp_5 | 5153         | Ig gamma-1 chain C region | EEQYNSTYR_5_4_2_0 | 100.0                                   | 40.2             | 0.0            | 0.0              | 14.6             | 0.0               | 5.2            | 12.7             | 0.0            | 0.0              | 0.0            | 0.0              | 0.0            | 0.0              |
| 414 | Human Plasma exp_2 | 8733         | Ig gamma-1 chain C region | EEQYNSTYR_5_4_2_1 | 74.5                                    | 31.9             | 0.0            | 0.0              | 100.0            | 0.0               | 20.6           | 31.2             | 0.0            | 0.0              | 0.0            | 0.0              | 0.0            | 0.0              |
| 415 | Human Plasma exp_3 | 8719         | Ig gamma-1 chain C region | EEQYNSTYR_5_4_2_1 | 86.1                                    | 44.6             | 0.0            | 0.0              | 100.0            | 11.8              | 9.1            | 51.5             | 0.0            | 0.0              | 0.0            | 0.0              | 0.0            | 0.0              |
| 416 | Human Plasma exp_5 | 8692         | Ig gamma-1 chain C region | EEQYNSTYR_5_4_2_1 | 83.8                                    | 30.1             | 0.0            | 0.0              | 100.0            | 0.0               | 13.3           | 20.4             | 0.0            | 0.0              | 0.0            | 0.0              | 0.0            | 0.0              |

**Supplementary Table 3. Continued.**

| No. | Experiments        | CID Scan No. | N-glycoproteins           | N-glycopeptides   | Relative intensities of B/Y series ions |                  |                |                  |                  |                   |                |                  |                |                  |                |                  |                |                  |
|-----|--------------------|--------------|---------------------------|-------------------|-----------------------------------------|------------------|----------------|------------------|------------------|-------------------|----------------|------------------|----------------|------------------|----------------|------------------|----------------|------------------|
|     |                    |              |                           |                   | B <sub>2</sub>                          | B <sub>2</sub> F | B <sub>3</sub> | B <sub>3</sub> F | B <sub>2</sub> S | B <sub>2</sub> SF | Y <sub>1</sub> | Y <sub>1</sub> F | Y <sub>2</sub> | Y <sub>2</sub> F | Y <sub>3</sub> | Y <sub>3</sub> F | Y <sub>4</sub> | Y <sub>4</sub> F |
| 417 | Human Plasma exp_4 | 6478         | Ig gamma-1 chain C region | EEQYNSTYR_5_5_1_0 | 0.0                                     | 0.0              | 4.8            | 0.0              | 0.0              | 0.0               | 100.0          | 90.9             | 21.5           | 19.0             | 0.0            | 0.0              | 2.4            | 0.0              |
| 418 | Human Plasma exp_4 | 13165        | Ig gamma-1 chain C region | EEQYNSTYR_5_5_1_2 | 24.4                                    | 0.0              | 0.0            | 0.0              | 100.0            | 5.1               | 12.6           | 9.1              | 0.0            | 0.0              | 0.0            | 0.0              | 0.0            | 0.0              |
| 419 | Human Plasma exp_1 | 13538        | Ig gamma-2 chain C region | EEQFNSTFR_3_3_0_0 | 8.9                                     | 0.0              | 10.5           | 0.0              | 0.0              | 0.0               | 100.0          | 0.0              | 18.9           | 0.0              | 12.0           | 0.0              | 27.5           | 0.0              |
| 420 | Human Plasma exp_2 | 13787        | Ig gamma-2 chain C region | EEQFNSTFR_3_3_0_0 | 9.1                                     | 0.0              | 8.6            | 0.0              | 0.0              | 0.0               | 100.0          | 0.0              | 16.5           | 0.0              | 9.3            | 0.0              | 36.3           | 0.0              |
| 421 | Human Plasma exp_5 | 13409        | Ig gamma-2 chain C region | EEQFNSTFR_3_3_0_0 | 14.8                                    | 0.0              | 4.6            | 0.0              | 0.0              | 0.0               | 100.0          | 0.0              | 0.0            | 0.0              | 21.4           | 0.0              | 63.4           | 0.0              |
| 422 | Human Plasma exp_1 | 13210        | Ig gamma-2 chain C region | EEQFNSTFR_3_3_1_0 | 32.2                                    | 4.5              | 11.4           | 0.0              | 3.1              | 0.0               | 100.0          | 78.9             | 10.8           | 4.9              | 36.2           | 23.9             | 75.5           | 13.0             |
| 423 | Human Plasma exp_2 | 13462        | Ig gamma-2 chain C region | EEQFNSTFR_3_3_1_0 | 31.9                                    | 5.3              | 12.5           | 0.0              | 0.0              | 0.0               | 100.0          | 85.7             | 15.7           | 6.4              | 33.0           | 27.3             | 78.1           | 15.8             |
| 424 | Human Plasma exp_3 | 13359        | Ig gamma-2 chain C region | EEQFNSTFR_3_3_1_0 | 17.4                                    | 3.0              | 3.1            | 0.0              | 1.8              | 0.0               | 100.0          | 58.5             | 4.6            | 2.2              | 20.9           | 17.4             | 51.6           | 7.2              |
| 425 | Human Plasma exp_4 | 13471        | Ig gamma-2 chain C region | EEQFNSTFR_3_3_1_0 | 23.5                                    | 3.9              | 9.9            | 0.0              | 0.0              | 0.0               | 100.0          | 72.3             | 6.9            | 4.3              | 25.5           | 25.1             | 72.0           | 10.4             |
| 426 | Human Plasma exp_5 | 13258        | Ig gamma-2 chain C region | EEQFNSTFR_3_3_1_0 | 34.0                                    | 4.6              | 13.0           | 0.0              | 2.5              | 0.0               | 100.0          | 72.7             | 7.0            | 0.0              | 35.7           | 23.4             | 65.8           | 13.8             |
| 427 | Human Plasma exp_1 | 13593        | Ig gamma-2 chain C region | EEQFNSTFR_3_4_0_0 | 5.2                                     | 0.0              | 9.1            | 0.0              | 0.0              | 0.0               | 100.0          | 0.0              | 19.1           | 0.0              | 16.6           | 0.0              | 34.0           | 0.0              |
| 428 | Human Plasma exp_4 | 13856        | Ig gamma-2 chain C region | EEQFNSTFR_3_4_0_0 | 4.8                                     | 0.0              | 9.5            | 0.0              | 0.0              | 0.0               | 100.0          | 0.0              | 18.6           | 0.0              | 16.8           | 0.0              | 33.6           | 0.0              |
| 429 | Human Plasma exp_1 | 13683        | Ig gamma-2 chain C region | EEQFNSTFR_3_4_1_0 | 0.0                                     | 0.0              | 7.4            | 0.0              | 0.0              | 0.0               | 100.0          | 53.7             | 19.3           | 5.7              | 13.5           | 0.0              | 23.4           | 6.6              |
| 430 | Human Plasma exp_2 | 13906        | Ig gamma-2 chain C region | EEQFNSTFR_3_4_1_0 | 0.0                                     | 0.0              | 8.0            | 0.0              | 0.0              | 0.0               | 100.0          | 53.8             | 17.5           | 6.0              | 15.3           | 0.0              | 24.8           | 6.7              |
| 431 | Human Plasma exp_3 | 13833        | Ig gamma-2 chain C region | EEQFNSTFR_3_4_1_0 | 0.0                                     | 0.0              | 8.1            | 0.0              | 0.0              | 0.0               | 100.0          | 53.2             | 19.0           | 6.1              | 15.6           | 0.0              | 23.8           | 6.1              |
| 432 | Human Plasma exp_4 | 13958        | Ig gamma-2 chain C region | EEQFNSTFR_3_4_1_0 | 0.0                                     | 0.0              | 7.6            | 0.0              | 0.0              | 0.0               | 100.0          | 55.3             | 20.4           | 6.3              | 15.4           | 3.1              | 22.9           | 6.0              |
| 433 | Human Plasma exp_5 | 13749        | Ig gamma-2 chain C region | EEQFNSTFR_3_4_1_0 | 0.0                                     | 0.0              | 8.1            | 0.0              | 0.0              | 0.0               | 100.0          | 54.8             | 18.4           | 5.7              | 14.7           | 2.7              | 25.0           | 7.0              |
| 434 | Human Plasma exp_1 | 13385        | Ig gamma-2 chain C region | EEQFNSTFR_4_3_1_0 | 13.6                                    | 3.4              | 10.4           | 0.0              | 0.0              | 0.0               | 100.0          | 95.8             | 10.6           | 3.2              | 8.4            | 2.4              | 33.6           | 6.9              |
| 435 | Human Plasma exp_2 | 13626        | Ig gamma-2 chain C region | EEQFNSTFR_4_3_1_0 | 12.5                                    | 2.7              | 8.9            | 0.0              | 0.0              | 0.0               | 100.0          | 83.7             | 11.0           | 4.8              | 9.6            | 0.0              | 28.6           | 6.2              |
| 436 | Human Plasma exp_3 | 13544        | Ig gamma-2 chain C region | EEQFNSTFR_4_3_1_0 | 11.5                                    | 2.7              | 8.9            | 0.0              | 0.0              | 0.0               | 100.0          | 85.5             | 11.2           | 4.6              | 10.4           | 0.0              | 34.0           | 4.8              |
| 437 | Human Plasma exp_4 | 13469        | Ig gamma-2 chain C region | EEQFNSTFR_4_3_1_0 | 12.7                                    | 2.8              | 9.5            | 0.0              | 0.0              | 0.0               | 100.0          | 83.1             | 11.7           | 4.1              | 10.1           | 0.0              | 31.6           | 4.4              |
| 438 | Human Plasma exp_5 | 13638        | Ig gamma-2 chain C region | EEQFNSTFR_4_3_1_0 | 81.2                                    | 0.0              | 0.0            | 0.0              | 0.0              | 0.0               | 43.7           | 16.0             | 36.0           | 0.0              | 0.0            | 0.0              | 14.2           | 100.0            |
| 439 | Human Plasma exp_5 | 13457        | Ig gamma-2 chain C region | EEQFNSTFR_4_3_1_0 | 12.1                                    | 3.2              | 9.4            | 0.0              | 0.0              | 0.0               | 100.0          | 90.2             | 11.3           | 4.0              | 11.0           | 0.0              | 32.8           | 8.8              |
| 440 | Human Plasma exp_1 | 17150        | Ig gamma-2 chain C region | EEQFNSTFR_4_3_1_1 | 69.9                                    | 0.0              | 19.1           | 0.0              | 100.0            | 0.0               | 28.5           | 14.9             | 0.0            | 0.0              | 8.6            | 0.0              | 0.0            | 0.0              |
| 441 | Human Plasma exp_1 | 16769        | Ig gamma-2 chain C region | EEQFNSTFR_4_3_1_1 | 0.0                                     | 0.0              | 12.8           | 0.0              | 48.5             | 0.0               | 100.0          | 66.9             | 0.0            | 0.0              | 0.0            | 0.0              | 36.4           | 0.0              |
| 442 | Human Plasma exp_2 | 17497        | Ig gamma-2 chain C region | EEQFNSTFR_4_3_1_1 | 68.1                                    | 0.0              | 17.2           | 0.0              | 100.0            | 0.0               | 21.6           | 29.9             | 6.9            | 0.0              | 6.4            | 9.1              | 0.0            | 0.0              |

Supplementary Table 3. Continued.

| No. | Experiments        | CID Scan No. | N-glycoproteins           | N-glycopeptides   | Relative intensities of B/Y series ions |                  |                |                  |                  |                   |                |                  |                |                  |                |                  |                |                  |
|-----|--------------------|--------------|---------------------------|-------------------|-----------------------------------------|------------------|----------------|------------------|------------------|-------------------|----------------|------------------|----------------|------------------|----------------|------------------|----------------|------------------|
|     |                    |              |                           |                   | B <sub>2</sub>                          | B <sub>2</sub> F | B <sub>3</sub> | B <sub>3</sub> F | B <sub>2</sub> S | B <sub>2</sub> SF | Y <sub>1</sub> | Y <sub>1</sub> F | Y <sub>2</sub> | Y <sub>2</sub> F | Y <sub>3</sub> | Y <sub>3</sub> F | Y <sub>4</sub> | Y <sub>4</sub> F |
| 443 | Human Plasma exp_3 | 17150        | Ig gamma-2 chain C region | EEQFNSTFR_4_3_1_1 | 77.8                                    | 0.0              | 17.4           | 0.0              | 100.0            | 0.0               | 31.1           | 33.5             | 0.0            | 0.0              | 16.2           | 12.3             | 0.0            | 0.0              |
| 444 | Human Plasma exp_3 | 17088        | Ig gamma-2 chain C region | EEQFNSTFR_4_3_1_1 | 0.0                                     | 0.0              | 0.0            | 0.0              | 24.0             | 0.0               | 100.0          | 75.6             | 7.8            | 7.3              | 0.0            | 0.0              | 69.9           | 0.0              |
| 445 | Human Plasma exp_4 | 17558        | Ig gamma-2 chain C region | EEQFNSTFR_4_3_1_1 | 70.9                                    | 0.0              | 17.0           | 0.0              | 100.0            | 0.0               | 28.1           | 23.6             | 0.0            | 0.0              | 7.1            | 8.8              | 0.0            | 0.0              |
| 446 | Human Plasma exp_5 | 17204        | Ig gamma-2 chain C region | EEQFNSTFR_4_3_1_1 | 72.5                                    | 0.0              | 15.9           | 0.0              | 100.0            | 0.0               | 34.8           | 17.0             | 0.0            | 0.0              | 15.7           | 12.0             | 0.0            | 0.0              |
| 447 | Human Plasma exp_5 | 16818        | Ig gamma-2 chain C region | EEQFNSTFR_4_3_1_1 | 0.0                                     | 0.0              | 7.2            | 0.0              | 37.3             | 0.0               | 100.0          | 73.8             | 7.4            | 7.2              | 8.4            | 6.5              | 52.8           | 0.0              |
| 448 | Human Plasma exp_1 | 13687        | Ig gamma-2 chain C region | EEQFNSTFR_4_4_1_0 | 100.0                                   | 0.0              | 0.0            | 0.0              | 0.0              | 0.0               | 21.9           | 28.0             | 0.0            | 0.0              | 0.0            | 0.0              | 16.1           | 31.7             |
| 449 | Human Plasma exp_1 | 12634        | Ig gamma-2 chain C region | EEQFNSTFR_4_4_1_0 | 0.0                                     | 0.0              | 11.3           | 0.0              | 0.0              | 0.0               | 100.0          | 92.6             | 14.8           | 17.6             | 11.0           | 0.0              | 47.3           | 13.2             |
| 450 | Human Plasma exp_2 | 13908        | Ig gamma-2 chain C region | EEQFNSTFR_4_4_1_0 | 100.0                                   | 0.0              | 0.0            | 0.0              | 0.0              | 0.0               | 24.8           | 31.2             | 0.0            | 0.0              | 0.0            | 0.0              | 17.9           | 37.0             |
| 451 | Human Plasma exp_2 | 12874        | Ig gamma-2 chain C region | EEQFNSTFR_4_4_1_0 | 0.0                                     | 0.0              | 12.7           | 0.0              | 0.0              | 0.0               | 100.0          | 85.8             | 12.1           | 8.0              | 12.6           | 6.0              | 38.7           | 11.9             |
| 452 | Human Plasma exp_3 | 13706        | Ig gamma-2 chain C region | EEQFNSTFR_4_4_1_0 | 0.0                                     | 2.3              | 7.6            | 0.0              | 0.0              | 0.0               | 100.0          | 70.8             | 21.4           | 12.7             | 17.3           | 6.5              | 31.4           | 4.7              |
| 453 | Human Plasma exp_4 | 13734        | Ig gamma-2 chain C region | EEQFNSTFR_4_4_1_0 | 100.0                                   | 0.0              | 0.0            | 0.0              | 0.0              | 0.0               | 40.3           | 41.3             | 0.0            | 0.0              | 0.0            | 0.0              | 24.7           | 42.3             |
| 454 | Human Plasma exp_4 | 13504        | Ig gamma-2 chain C region | EEQFNSTFR_4_4_1_0 | 0.0                                     | 3.5              | 5.2            | 0.0              | 0.0              | 0.0               | 100.0          | 83.3             | 14.8           | 11.7             | 19.2           | 7.9              | 35.5           | 6.2              |
| 455 | Human Plasma exp_5 | 13532        | Ig gamma-2 chain C region | EEQFNSTFR_4_4_1_0 | 100.0                                   | 0.0              | 0.0            | 0.0              | 0.0              | 0.0               | 43.0           | 40.6             | 0.0            | 0.0              | 0.0            | 0.0              | 25.4           | 41.0             |
| 456 | Human Plasma exp_5 | 12719        | Ig gamma-2 chain C region | EEQFNSTFR_4_4_1_0 | 0.0                                     | 0.0              | 4.1            | 0.0              | 0.0              | 0.0               | 97.3           | 100.0            | 7.9            | 13.0             | 12.7           | 5.4              | 38.5           | 6.6              |
| 457 | Human Plasma exp_1 | 16956        | Ig gamma-2 chain C region | EEQFNSTFR_4_4_1_1 | 0.0                                     | 0.0              | 3.8            | 0.0              | 25.9             | 0.0               | 100.0          | 85.6             | 7.0            | 16.6             | 5.5            | 0.0              | 22.9           | 2.6              |
| 458 | Human Plasma exp_2 | 17547        | Ig gamma-2 chain C region | EEQFNSTFR_4_4_1_1 | 57.4                                    | 0.0              | 0.0            | 0.0              | 100.0            | 0.0               | 39.8           | 58.1             | 0.0            | 0.0              | 0.0            | 0.0              | 26.0           | 0.0              |
| 459 | Human Plasma exp_2 | 17308        | Ig gamma-2 chain C region | EEQFNSTFR_4_4_1_1 | 0.0                                     | 0.0              | 5.3            | 0.0              | 23.8             | 0.0               | 100.0          | 99.7             | 15.8           | 18.8             | 8.3            | 0.0              | 35.7           | 0.0              |
| 460 | Human Plasma exp_3 | 16967        | Ig gamma-2 chain C region | EEQFNSTFR_4_4_1_1 | 62.5                                    | 0.0              | 12.8           | 0.0              | 100.0            | 0.0               | 47.3           | 51.7             | 0.0            | 0.0              | 0.0            | 0.0              | 24.2           | 0.0              |
| 461 | Human Plasma exp_3 | 16948        | Ig gamma-2 chain C region | EEQFNSTFR_4_4_1_1 | 0.0                                     | 0.0              | 8.4            | 0.0              | 24.1             | 0.0               | 95.8           | 100.0            | 0.0            | 0.0              | 5.6            | 0.0              | 25.4           | 0.0              |
| 462 | Human Plasma exp_4 | 17600        | Ig gamma-2 chain C region | EEQFNSTFR_4_4_1_1 | 65.1                                    | 0.0              | 0.0            | 0.0              | 100.0            | 0.0               | 57.6           | 53.1             | 0.0            | 0.0              | 0.0            | 0.0              | 31.0           | 0.0              |
| 463 | Human Plasma exp_4 | 17369        | Ig gamma-2 chain C region | EEQFNSTFR_4_4_1_1 | 0.0                                     | 0.0              | 0.0            | 0.0              | 16.8             | 0.0               | 100.0          | 93.6             | 9.9            | 6.5              | 4.9            | 0.0              | 22.9           | 0.0              |
| 464 | Human Plasma exp_5 | 17237        | Ig gamma-2 chain C region | EEQFNSTFR_4_4_1_1 | 61.1                                    | 0.0              | 0.0            | 0.0              | 100.0            | 0.0               | 53.2           | 49.7             | 0.0            | 0.0              | 0.0            | 0.0              | 33.3           | 0.0              |
| 465 | Human Plasma exp_5 | 17009        | Ig gamma-2 chain C region | EEQFNSTFR_4_4_1_1 | 0.0                                     | 0.0              | 0.0            | 0.0              | 27.5             | 0.0               | 100.0          | 56.1             | 5.4            | 4.1              | 3.2            | 0.0              | 20.7           | 0.0              |
| 466 | Human Plasma exp_1 | 13534        | Ig gamma-2 chain C region | EEQFNSTFR_4_5_1_0 | 0.0                                     | 0.0              | 5.6            | 0.0              | 0.0              | 0.0               | 100.0          | 85.3             | 27.7           | 23.6             | 8.3            | 3.0              | 13.5           | 0.0              |
| 467 | Human Plasma exp_2 | 13785        | Ig gamma-2 chain C region | EEQFNSTFR_4_5_1_0 | 0.0                                     | 0.0              | 7.2            | 0.0              | 0.0              | 0.0               | 100.0          | 90.8             | 34.0           | 20.6             | 2.7            | 0.0              | 2.5            | 0.0              |
| 468 | Human Plasma exp_3 | 13927        | Ig gamma-2 chain C region | EEQFNSTFR_4_5_1_0 | 0.0                                     | 0.0              | 4.3            | 0.0              | 6.7              | 0.0               | 100.0          | 59.8             | 14.1           | 15.3             | 2.0            | 0.0              | 2.9            | 0.0              |

**Supplementary Table 3. Continued.**

| No. | Experiments        | CID Scan No. | N-glycoproteins           | N-glycopeptides   | Relative intensities of B/Y series ions |                  |                |                  |                  |                   |                |                  |                |                  |                |                  |                |                  |
|-----|--------------------|--------------|---------------------------|-------------------|-----------------------------------------|------------------|----------------|------------------|------------------|-------------------|----------------|------------------|----------------|------------------|----------------|------------------|----------------|------------------|
|     |                    |              |                           |                   | B <sub>2</sub>                          | B <sub>2</sub> F | B <sub>3</sub> | B <sub>3</sub> F | B <sub>2</sub> S | B <sub>2</sub> SF | Y <sub>1</sub> | Y <sub>1</sub> F | Y <sub>2</sub> | Y <sub>2</sub> F | Y <sub>3</sub> | Y <sub>3</sub> F | Y <sub>4</sub> | Y <sub>4</sub> F |
| 469 | Human Plasma exp_4 | 13820        | Ig gamma-2 chain C region | EEQFNSTFR_4_5_1_0 | 0.0                                     | 0.0              | 6.1            | 0.0              | 0.0              | 0.0               | 100.0          | 90.0             | 28.9           | 21.4             | 5.6            | 0.0              | 4.9            | 0.0              |
| 470 | Human Plasma exp_2 | 17259        | Ig gamma-2 chain C region | EEQFNSTFR_5_3_1_1 | 73.7                                    | 0.0              | 10.2           | 0.0              | 100.0            | 0.0               | 3.7            | 0.0              | 0.0            | 0.0              | 0.0            | 0.0              | 7.8            | 23.6             |
| 471 | Human Plasma exp_1 | 13328        | Ig gamma-2 chain C region | EEQFNSTFR_5_4_1_0 | 0.0                                     | 2.9              | 7.3            | 0.0              | 0.0              | 0.0               | 100.0          | 90.9             | 13.9           | 14.9             | 17.4           | 8.7              | 31.5           | 2.9              |
| 472 | Human Plasma exp_3 | 16763        | Ig gamma-2 chain C region | EEQFNSTFR_5_4_1_0 | 0.0                                     | 4.4              | 8.7            | 0.0              | 0.0              | 0.0               | 100.0          | 80.5             | 14.3           | 12.6             | 9.8            | 0.0              | 21.3           | 2.3              |
| 473 | Human Plasma exp_4 | 13629        | Ig gamma-2 chain C region | EEQFNSTFR_5_4_1_0 | 0.0                                     | 2.9              | 9.2            | 0.0              | 0.0              | 0.0               | 100.0          | 98.1             | 14.0           | 16.7             | 16.3           | 0.0              | 32.6           | 4.1              |
| 474 | Human Plasma exp_1 | 16783        | Ig gamma-2 chain C region | EEQFNSTFR_5_4_1_1 | 100.0                                   | 0.0              | 0.0            | 0.0              | 44.1             | 0.0               | 3.8            | 0.0              | 0.0            | 0.0              | 0.0            | 0.0              | 8.9            | 30.8             |
| 475 | Human Plasma exp_1 | 16698        | Ig gamma-2 chain C region | EEQFNSTFR_5_4_1_1 | 0.0                                     | 2.4              | 4.9            | 0.0              | 19.0             | 0.0               | 90.9           | 100.0            | 8.3            | 19.1             | 14.9           | 6.9              | 31.5           | 1.0              |
| 476 | Human Plasma exp_2 | 17088        | Ig gamma-2 chain C region | EEQFNSTFR_5_4_1_1 | 100.0                                   | 0.0              | 8.9            | 0.0              | 41.2             | 0.0               | 8.3            | 13.2             | 0.0            | 0.0              | 0.0            | 0.0              | 8.8            | 37.1             |
| 477 | Human Plasma exp_2 | 17254        | Ig gamma-2 chain C region | EEQFNSTFR_5_4_1_1 | 0.0                                     | 0.0              | 4.7            | 0.0              | 18.2             | 0.0               | 80.9           | 100.0            | 10.1           | 15.0             | 6.4            | 2.9              | 17.4           | 0.0              |
| 478 | Human Plasma exp_3 | 16737        | Ig gamma-2 chain C region | EEQFNSTFR_5_4_1_1 | 100.0                                   | 0.0              | 9.2            | 0.0              | 38.3             | 0.0               | 3.4            | 10.2             | 0.0            | 0.0              | 0.0            | 0.0              | 13.7           | 43.4             |
| 479 | Human Plasma exp_3 | 16686        | Ig gamma-2 chain C region | EEQFNSTFR_5_4_1_1 | 0.0                                     | 0.0              | 9.3            | 0.0              | 23.4             | 0.0               | 100.0          | 83.9             | 0.0            | 0.0              | 0.0            | 0.0              | 15.1           | 0.0              |
| 480 | Human Plasma exp_4 | 17316        | Ig gamma-2 chain C region | EEQFNSTFR_5_4_1_1 | 0.0                                     | 0.0              | 0.0            | 0.0              | 19.5             | 0.0               | 100.0          | 98.9             | 13.0           | 11.2             | 3.9            | 9.5              | 15.2           | 0.0              |
| 481 | Human Plasma exp_5 | 16770        | Ig gamma-2 chain C region | EEQFNSTFR_5_4_1_1 | 100.0                                   | 0.0              | 6.6            | 0.0              | 42.5             | 0.0               | 2.8            | 2.9              | 0.0            | 0.0              | 0.0            | 0.0              | 10.9           | 57.2             |
| 482 | Human Plasma exp_5 | 16729        | Ig gamma-2 chain C region | EEQFNSTFR_5_4_1_1 | 0.0                                     | 0.0              | 0.0            | 0.0              | 19.2             | 0.0               | 91.8           | 100.0            | 0.0            | 0.0              | 7.3            | 0.0              | 18.5           | 0.0              |
| 483 | Human Plasma exp_5 | 20908        | Ig gamma-2 chain C region | EEQFNSTFR_5_4_1_2 | 40.6                                    | 0.0              | 0.0            | 0.0              | 100.0            | 0.0               | 13.5           | 25.1             | 0.0            | 0.0              | 0.0            | 0.0              | 6.4            | 0.0              |
| 484 | Human Plasma exp_4 | 16931        | Ig gamma-2 chain C region | EEQFNSTFR_5_4_2_1 | 100.0                                   | 44.1             | 0.0            | 0.0              | 96.0             | 0.0               | 13.3           | 38.4             | 0.0            | 0.0              | 0.0            | 0.0              | 0.0            | 0.0              |
| 485 | Human Plasma exp_5 | 16592        | Ig gamma-2 chain C region | EEQFNSTFR_5_4_2_1 | 77.4                                    | 31.8             | 0.0            | 0.0              | 100.0            | 0.0               | 16.6           | 32.7             | 0.0            | 0.0              | 0.0            | 0.0              | 0.0            | 0.0              |
| 486 | Human Plasma exp_3 | 13658        | Ig gamma-2 chain C region | EEQFNSTFR_5_5_1_0 | 0.0                                     | 0.0              | 4.0            | 0.0              | 0.0              | 0.0               | 93.3           | 100.0            | 1.7            | 0.0              | 1.9            | 0.0              | 6.4            | 0.0              |
| 487 | Human Plasma exp_1 | 16809        | Ig gamma-2 chain C region | EEQFNSTFR_6_3_1_1 | 59.3                                    | 0.0              | 0.0            | 0.0              | 100.0            | 0.0               | 21.9           | 22.1             | 0.0            | 0.0              | 0.0            | 0.0              | 6.9            | 26.2             |
| 488 | Human Plasma exp_4 | 17195        | Ig gamma-2 chain C region | EEQFNSTFR_6_3_1_1 | 59.1                                    | 0.0              | 11.2           | 0.0              | 100.0            | 0.0               | 20.8           | 22.6             | 0.0            | 0.0              | 0.0            | 0.0              | 0.0            | 0.0              |
| 489 | Human Plasma exp_5 | 16894        | Ig gamma-2 chain C region | EEQFNSTFR_6_3_1_1 | 60.2                                    | 0.0              | 0.0            | 0.0              | 100.0            | 0.0               | 34.0           | 35.7             | 0.0            | 0.0              | 0.0            | 0.0              | 10.8           | 23.3             |
| 490 | Human Plasma exp_1 | 10127        | Ig gamma-3 chain C region | EEQYNSTFR_3_4_1_0 | 0.0                                     | 0.0              | 9.3            | 0.0              | 0.0              | 0.0               | 100.0          | 76.6             | 8.4            | 4.8              | 18.2           | 0.0              | 43.5           | 24.1             |
| 491 | Human Plasma exp_3 | 9906         | Ig gamma-3 chain C region | EEQYNSTFR_3_4_1_0 | 0.0                                     | 0.0              | 10.8           | 0.0              | 0.0              | 0.0               | 100.0          | 67.6             | 20.3           | 7.4              | 18.9           | 6.0              | 46.6           | 19.0             |
| 492 | Human Plasma exp_4 | 10030        | Ig gamma-3 chain C region | EEQYNSTFR_3_4_1_0 | 0.0                                     | 0.0              | 11.2           | 0.0              | 0.0              | 0.0               | 100.0          | 66.3             | 21.9           | 7.2              | 20.8           | 4.5              | 39.0           | 17.3             |
| 493 | Human Plasma exp_5 | 10292        | Ig gamma-3 chain C region | EEQYNSTFR_3_4_1_0 | 0.0                                     | 0.0              | 0.0            | 0.0              | 4.6              | 0.0               | 100.0          | 86.2             | 5.2            | 0.0              | 15.7           | 0.0              | 27.0           | 6.0              |
| 494 | Human Plasma exp_1 | 9543         | Ig gamma-3 chain C region | EEQYNSTFR_4_3_1_0 | 12.9                                    | 0.0              | 7.7            | 0.0              | 0.0              | 0.0               | 100.0          | 84.2             | 2.5            | 0.0              | 7.9            | 0.0              | 39.3           | 5.5              |

**Supplementary Table 3. Continued.**

| No. | Experiments        | CID Scan No. | N-glycoproteins           | N-glycopeptides   | Relative intensities of B/Y series ions |                  |                |                  |                  |                   |                |                  |                |                  |                |                  |                |                  |
|-----|--------------------|--------------|---------------------------|-------------------|-----------------------------------------|------------------|----------------|------------------|------------------|-------------------|----------------|------------------|----------------|------------------|----------------|------------------|----------------|------------------|
|     |                    |              |                           |                   | B <sub>2</sub>                          | B <sub>2</sub> F | B <sub>3</sub> | B <sub>3</sub> F | B <sub>2</sub> S | B <sub>2</sub> SF | Y <sub>1</sub> | Y <sub>1</sub> F | Y <sub>2</sub> | Y <sub>2</sub> F | Y <sub>3</sub> | Y <sub>3</sub> F | Y <sub>4</sub> | Y <sub>4</sub> F |
| 495 | Human Plasma exp_3 | 9595         | Ig gamma-3 chain C region | EEQYNSTFR_4_3_1_0 | 11.6                                    | 0.0              | 10.9           | 0.0              | 6.3              | 0.0               | 100.0          | 91.5             | 4.5            | 2.4              | 8.8            | 0.0              | 33.3           | 6.8              |
| 496 | Human Plasma exp_5 | 9665         | Ig gamma-3 chain C region | EEQYNSTFR_4_3_1_0 | 13.3                                    | 0.0              | 10.2           | 0.0              | 0.0              | 0.0               | 100.0          | 78.1             | 8.6            | 4.8              | 4.0            | 0.0              | 34.7           | 6.1              |
| 497 | Human Plasma exp_1 | 9505         | Ig gamma-3 chain C region | EEQYNSTFR_5_4_1_0 | 0.0                                     | 0.0              | 6.4            | 0.0              | 0.0              | 0.0               | 100.0          | 95.5             | 10.6           | 17.4             | 11.3           | 6.0              | 30.3           | 0.0              |
| 498 | Human Plasma exp_2 | 9825         | Ig gamma-3 chain C region | EEQYNSTFR_5_4_1_0 | 0.0                                     | 4.0              | 9.3            | 0.0              | 0.0              | 0.0               | 96.4           | 100.0            | 12.2           | 19.1             | 7.4            | 5.3              | 32.0           | 3.2              |
| 499 | Human Plasma exp_3 | 9490         | Ig gamma-3 chain C region | EEQYNSTFR_5_4_1_0 | 0.0                                     | 0.0              | 6.5            | 0.0              | 0.0              | 0.0               | 97.6           | 100.0            | 14.6           | 8.3              | 0.0            | 0.0              | 15.5           | 0.0              |
| 500 | Human Plasma exp_5 | 9610         | Ig gamma-3 chain C region | EEQYNSTFR_5_4_1_0 | 0.0                                     | 3.7              | 4.1            | 0.0              | 0.0              | 0.0               | 94.2           | 100.0            | 7.3            | 18.2             | 14.9           | 5.4              | 24.0           | 1.7              |
| 501 | Human Plasma exp_1 | 12957        | Ig gamma-3 chain C region | EEQYNSTFR_5_4_1_1 | 0.0                                     | 0.0              | 13.4           | 0.0              | 39.6             | 0.0               | 92.6           | 100.0            | 0.0            | 0.0              | 0.0            | 0.0              | 40.1           | 0.0              |
| 502 | Human Plasma exp_2 | 13111        | Ig gamma-3 chain C region | EEQYNSTFR_5_4_1_1 | 100.0                                   | 0.0              | 6.0            | 0.0              | 42.9             | 0.0               | 3.0            | 3.4              | 0.0            | 0.0              | 2.7            | 0.0              | 9.8            | 55.6             |
| 503 | Human Plasma exp_2 | 12990        | Ig gamma-3 chain C region | EEQYNSTFR_5_4_1_1 | 0.0                                     | 0.0              | 0.0            | 0.0              | 22.3             | 0.0               | 100.0          | 85.6             | 17.3           | 17.5             | 0.0            | 0.0              | 22.1           | 0.0              |
| 504 | Human Plasma exp_3 | 12972        | Ig gamma-3 chain C region | EEQYNSTFR_5_4_1_1 | 100.0                                   | 0.0              | 3.1            | 0.0              | 41.4             | 0.0               | 7.0            | 6.1              | 0.0            | 0.0              | 0.0            | 0.0              | 13.2           | 44.9             |
| 505 | Human Plasma exp_4 | 13137        | Ig gamma-3 chain C region | EEQYNSTFR_5_4_1_1 | 100.0                                   | 0.0              | 6.7            | 0.0              | 46.1             | 0.0               | 10.4           | 8.1              | 0.0            | 0.0              | 0.0            | 0.0              | 12.7           | 55.8             |
| 506 | Human Plasma exp_5 | 12944        | Ig gamma-3 chain C region | EEQYNSTFR_5_4_1_1 | 100.0                                   | 0.0              | 8.9            | 0.0              | 49.4             | 0.0               | 9.2            | 7.0              | 0.0            | 0.0              | 0.0            | 0.0              | 13.1           | 49.0             |
| 507 | Human Plasma exp_4 | 16943        | Ig gamma-3 chain C region | EEQYNSTFR_5_4_1_2 | 49.1                                    | 0.0              | 7.9            | 0.0              | 100.0            | 8.3               | 7.0            | 19.9             | 0.0            | 0.0              | 0.0            | 0.0              | 0.0            | 0.0              |
| 508 | Human Plasma exp_5 | 16636        | Ig gamma-3 chain C region | EEQYNSTFR_5_4_1_2 | 36.2                                    | 0.0              | 0.0            | 0.0              | 100.0            | 0.0               | 9.6            | 17.3             | 0.0            | 0.0              | 0.0            | 0.0              | 2.4            | 0.0              |
| 509 | Human Plasma exp_1 | 9753         | Ig gamma-4 chain C region | EEQFNSTYR_3_3_1_0 | 8.9                                     | 0.0              | 12.8           | 0.0              | 0.0              | 0.0               | 100.0          | 51.7             | 11.8           | 1.3              | 17.0           | 7.5              | 36.0           | 15.8             |
| 510 | Human Plasma exp_2 | 9935         | Ig gamma-4 chain C region | EEQFNSTYR_3_3_1_0 | 14.7                                    | 0.0              | 15.7           | 0.0              | 0.0              | 0.0               | 100.0          | 70.7             | 17.6           | 2.7              | 19.3           | 7.6              | 48.2           | 19.2             |
| 511 | Human Plasma exp_3 | 9928         | Ig gamma-4 chain C region | EEQFNSTYR_3_3_1_0 | 10.6                                    | 0.0              | 15.6           | 0.0              | 0.0              | 0.0               | 100.0          | 78.5             | 17.6           | 3.5              | 12.6           | 2.6              | 44.4           | 20.8             |
| 512 | Human Plasma exp_4 | 9975         | Ig gamma-4 chain C region | EEQFNSTYR_3_3_1_0 | 11.5                                    | 0.0              | 13.9           | 0.0              | 0.0              | 0.0               | 100.0          | 68.4             | 14.4           | 0.0              | 18.1           | 9.6              | 62.9           | 15.1             |
| 513 | Human Plasma exp_5 | 9897         | Ig gamma-4 chain C region | EEQFNSTYR_3_3_1_0 | 11.2                                    | 0.0              | 10.8           | 0.0              | 0.0              | 0.0               | 100.0          | 73.3             | 15.4           | 0.0              | 23.5           | 0.0              | 47.1           | 21.3             |
| 514 | Human Plasma exp_1 | 9787         | Ig gamma-4 chain C region | EEQFNSTYR_3_4_1_0 | 0.0                                     | 0.0              | 11.9           | 0.0              | 0.0              | 0.0               | 100.0          | 62.5             | 18.9           | 5.3              | 21.3           | 4.0              | 40.0           | 16.1             |
| 515 | Human Plasma exp_2 | 9981         | Ig gamma-4 chain C region | EEQFNSTYR_3_4_1_0 | 0.0                                     | 0.0              | 11.0           | 0.0              | 0.0              | 0.0               | 100.0          | 62.5             | 22.5           | 6.9              | 21.0           | 0.0              | 39.7           | 15.7             |
| 516 | Human Plasma exp_3 | 10070        | Ig gamma-4 chain C region | EEQFNSTYR_3_4_1_0 | 0.0                                     | 0.0              | 11.3           | 0.0              | 0.0              | 0.0               | 100.0          | 59.7             | 18.5           | 5.7              | 19.2           | 0.0              | 37.5           | 13.8             |
| 517 | Human Plasma exp_4 | 10210        | Ig gamma-4 chain C region | EEQFNSTYR_3_4_1_0 | 0.0                                     | 0.0              | 11.1           | 0.0              | 0.0              | 0.0               | 100.0          | 67.4             | 21.8           | 6.6              | 18.9           | 5.0              | 39.3           | 14.8             |
| 518 | Human Plasma exp_5 | 10108        | Ig gamma-4 chain C region | EEQFNSTYR_3_4_1_0 | 0.0                                     | 0.0              | 10.3           | 0.0              | 0.0              | 0.0               | 100.0          | 60.4             | 19.1           | 6.0              | 19.8           | 4.9              | 36.8           | 13.6             |
| 519 | Human Plasma exp_1 | 10485        | Ig gamma-4 chain C region | EEQFNSTYR_3_5_1_0 | 0.0                                     | 0.0              | 0.0            | 0.0              | 0.0              | 0.0               | 100.0          | 58.8             | 33.1           | 17.6             | 9.3            | 0.0              | 5.5            | 6.1              |
| 520 | Human Plasma exp_2 | 10657        | Ig gamma-4 chain C region | EEQFNSTYR_3_5_1_0 | 0.0                                     | 0.0              | 8.5            | 0.0              | 0.0              | 0.0               | 100.0          | 80.1             | 42.1           | 14.1             | 13.4           | 0.0              | 8.3            | 3.2              |



**Supplementary Table 3. Continued.**

| No. | Experiments        | CID Scan No. | N-glycoproteins           | N-glycopeptides               | Relative intensities of B/Y series ions |                  |                |                  |                  |                   |                |                  |                |                  |                |                  |                |                  |
|-----|--------------------|--------------|---------------------------|-------------------------------|-----------------------------------------|------------------|----------------|------------------|------------------|-------------------|----------------|------------------|----------------|------------------|----------------|------------------|----------------|------------------|
|     |                    |              |                           |                               | B <sub>2</sub>                          | B <sub>2</sub> F | B <sub>3</sub> | B <sub>3</sub> F | B <sub>2</sub> S | B <sub>2</sub> SF | Y <sub>1</sub> | Y <sub>1</sub> F | Y <sub>2</sub> | Y <sub>2</sub> F | Y <sub>3</sub> | Y <sub>3</sub> F | Y <sub>4</sub> | Y <sub>4</sub> F |
| 521 | Human Plasma exp_3 | 10465        | Ig gamma-4 chain C region | EEQFNSTYR_3_5_1_0             | 0.0                                     | 0.0              | 0.0            | 0.0              | 0.0              | 0.0               | 100.0          | 80.6             | 6.4            | 7.6              | 0.0            | 0.0              | 6.4            | 0.0              |
| 522 | Human Plasma exp_4 | 10746        | Ig gamma-4 chain C region | EEQFNSTYR_3_5_1_0             | 0.0                                     | 0.0              | 0.0            | 0.0              | 0.0              | 0.0               | 100.0          | 65.0             | 37.3           | 15.9             | 11.8           | 0.0              | 8.6            | 0.0              |
| 523 | Human Plasma exp_5 | 10601        | Ig gamma-4 chain C region | EEQFNSTYR_3_5_1_0             | 0.0                                     | 0.0              | 6.0            | 0.0              | 0.0              | 0.0               | 100.0          | 69.1             | 28.6           | 21.3             | 14.0           | 0.0              | 4.5            | 3.1              |
| 524 | Human Plasma exp_2 | 9717         | Ig gamma-4 chain C region | EEQFNSTYR_4_3_1_0             | 14.9                                    | 0.0              | 10.6           | 0.0              | 3.1              | 0.0               | 100.0          | 94.0             | 9.9            | 4.4              | 4.8            | 0.0              | 42.9           | 8.1              |
| 525 | Human Plasma exp_3 | 9741         | Ig gamma-4 chain C region | EEQFNSTYR_4_3_1_0             | 15.9                                    | 0.0              | 8.5            | 0.0              | 0.0              | 0.0               | 100.0          | 91.3             | 6.6            | 3.9              | 10.5           | 1.7              | 36.4           | 6.0              |
| 526 | Human Plasma exp_4 | 9922         | Ig gamma-4 chain C region | EEQFNSTYR_4_3_1_0             | 13.0                                    | 5.4              | 11.3           | 0.0              | 0.0              | 0.0               | 96.1           | 100.0            | 16.1           | 0.0              | 10.3           | 0.0              | 37.4           | 8.3              |
| 527 | Human Plasma exp_1 | 9840         | Ig gamma-4 chain C region | EEQFNSTYR_4_4_1_0             | 100.0                                   | 0.0              | 0.0            | 0.0              | 0.0              | 0.0               | 26.8           | 33.4             | 0.0            | 0.0              | 0.0            | 0.0              | 19.8           | 37.6             |
| 528 | Human Plasma exp_2 | 10037        | Ig gamma-4 chain C region | EEQFNSTYR_4_4_1_0             | 100.0                                   | 0.0              | 0.0            | 0.0              | 0.0              | 0.0               | 32.0           | 35.1             | 0.0            | 0.0              | 0.0            | 0.0              | 20.8           | 39.5             |
| 529 | Human Plasma exp_2 | 10245        | Ig gamma-4 chain C region | EEQFNSTYR_4_4_1_0             | 0.0                                     | 0.0              | 0.0            | 0.0              | 0.0              | 0.0               | 100.0          | 78.2             | 0.0            | 0.0              | 5.1            | 0.0              | 29.1           | 9.3              |
| 530 | Human Plasma exp_5 | 9987         | Ig gamma-4 chain C region | EEQFNSTYR_4_4_1_0             | 100.0                                   | 0.0              | 0.0            | 0.0              | 0.0              | 0.0               | 26.9           | 32.4             | 0.0            | 0.0              | 0.0            | 0.0              | 20.0           | 41.8             |
| 531 | Human Plasma exp_5 | 10006        | Ig gamma-4 chain C region | EEQFNSTYR_4_4_1_0             | 0.0                                     | 3.0              | 12.6           | 0.0              | 0.0              | 0.0               | 100.0          | 74.5             | 17.9           | 12.1             | 17.7           | 7.1              | 41.1           | 11.7             |
| 532 | Human Plasma exp_1 | 12976        | Ig gamma-4 chain C region | EEQFNSTYR_4_4_1_1             | 100.0                                   | 22.4             | 13.2           | 0.0              | 82.7             | 0.0               | 36.1           | 29.8             | 0.0            | 0.0              | 0.0            | 0.0              | 14.2           | 0.0              |
| 533 | Human Plasma exp_1 | 13030        | Ig gamma-4 chain C region | EEQFNSTYR_4_4_1_1             | 0.0                                     | 3.3              | 7.7            | 0.0              | 28.0             | 0.0               | 100.0          | 91.5             | 14.0           | 18.1             | 12.6           | 12.7             | 37.9           | 6.3              |
| 534 | Human Plasma exp_2 | 13233        | Ig gamma-4 chain C region | EEQFNSTYR_4_4_1_1             | 100.0                                   | 23.6             | 13.8           | 0.0              | 71.7             | 0.0               | 47.0           | 35.5             | 0.0            | 0.0              | 0.0            | 0.0              | 21.5           | 0.0              |
| 535 | Human Plasma exp_3 | 13138        | Ig gamma-4 chain C region | EEQFNSTYR_4_4_1_1             | 100.0                                   | 17.6             | 13.7           | 0.0              | 81.6             | 0.0               | 39.2           | 37.6             | 0.0            | 0.0              | 0.0            | 0.0              | 10.7           | 0.0              |
| 536 | Human Plasma exp_4 | 13288        | Ig gamma-4 chain C region | EEQFNSTYR_4_4_1_1             | 100.0                                   | 20.0             | 13.2           | 0.0              | 90.3             | 0.0               | 60.2           | 44.1             | 0.0            | 0.0              | 0.0            | 0.0              | 23.9           | 0.0              |
| 537 | Human Plasma exp_5 | 13088        | Ig gamma-4 chain C region | EEQFNSTYR_4_4_1_1             | 96.6                                    | 17.8             | 18.3           | 0.0              | 100.0            | 0.0               | 52.6           | 46.1             | 0.0            | 0.0              | 0.0            | 0.0              | 30.1           | 0.0              |
| 538 | Human Plasma exp_2 | 10542        | Ig gamma-4 chain C region | EEQFNSTYR_4_5_1_0             | 0.0                                     | 0.0              | 0.0            | 0.0              | 6.4              | 0.0               | 90.7           | 100.0            | 30.9           | 18.3             | 0.0            | 0.0              | 0.0            | 0.0              |
| 539 | Human Plasma exp_3 | 9633         | Ig gamma-4 chain C region | EEQFNSTYR_5_4_1_0             | 0.0                                     | 2.7              | 7.2            | 0.0              | 0.0              | 0.0               | 93.5           | 100.0            | 8.8            | 14.2             | 11.7           | 8.2              | 32.8           | 0.0              |
| 540 | Human Plasma exp_2 | 26482        | Ig mu chain C region      | GLTFQQNASSMCVDPQDTAIR_5_4_1_1 | 93.3                                    | 0.0              | 0.0            | 0.0              | 85.9             | 0.0               | 62.1           | 100.0            | 0.0            | 0.0              | 0.0            | 0.0              | 69.8           | 73.1             |
| 541 | Human Plasma exp_1 | 2772         | Ig mu chain C region      | NNSDISSTR_4_3_0_1             | 74.4                                    | 0.0              | 0.0            | 0.0              | 100.0            | 0.0               | 84.3           | 0.0              | 4.7            | 0.0              | 8.1            | 0.0              | 80.4           | 0.0              |
| 542 | Human Plasma exp_2 | 2942         | Ig mu chain C region      | NNSDISSTR_4_3_0_1             | 68.3                                    | 0.0              | 15.9           | 0.0              | 100.0            | 0.0               | 94.8           | 0.0              | 12.0           | 0.0              | 19.9           | 0.0              | 81.4           | 0.0              |
| 543 | Human Plasma exp_3 | 2842         | Ig mu chain C region      | NNSDISSTR_4_3_0_1             | 79.7                                    | 0.0              | 27.0           | 0.0              | 90.2             | 0.0               | 100.0          | 0.0              | 5.9            | 0.0              | 25.6           | 0.0              | 74.5           | 0.0              |
| 544 | Human Plasma exp_4 | 2928         | Ig mu chain C region      | NNSDISSTR_4_3_0_1             | 67.1                                    | 0.0              | 18.4           | 0.0              | 100.0            | 0.0               | 89.8           | 0.0              | 3.1            | 0.0              | 21.0           | 0.0              | 61.1           | 0.0              |
| 545 | Human Plasma exp_5 | 2834         | Ig mu chain C region      | NNSDISSTR_4_3_0_1             | 76.1                                    | 0.0              | 22.7           | 0.0              | 91.5             | 0.0               | 100.0          | 0.0              | 4.4            | 0.0              | 26.4           | 0.0              | 55.4           | 0.0              |
| 546 | Human Plasma exp_1 | 3001         | Ig mu chain C region      | NNSDISSTR_4_3_1_1             | 83.1                                    | 0.0              | 16.0           | 0.0              | 100.0            | 0.0               | 30.3           | 41.7             | 2.6            | 9.2              | 4.5            | 14.8             | 38.1           | 93.3             |

**Supplementary Table 3. Continued.**

| No. | Experiments        | CID Scan No. | N-glycoproteins        | N-glycopeptides     | Relative intensities of B/Y series ions |                  |                |                  |                  |                   |                |                  |                |                  |                |                  |                |                  |
|-----|--------------------|--------------|------------------------|---------------------|-----------------------------------------|------------------|----------------|------------------|------------------|-------------------|----------------|------------------|----------------|------------------|----------------|------------------|----------------|------------------|
|     |                    |              |                        |                     | B <sub>2</sub>                          | B <sub>2</sub> F | B <sub>3</sub> | B <sub>3</sub> F | B <sub>2</sub> S | B <sub>2</sub> SF | Y <sub>1</sub> | Y <sub>1</sub> F | Y <sub>2</sub> | Y <sub>2</sub> F | Y <sub>3</sub> | Y <sub>3</sub> F | Y <sub>4</sub> | Y <sub>4</sub> F |
| 547 | Human Plasma exp_1 | 2681         | Ig mu chain C region   | NNSDISSTR_5_3_0_1   | 52.5                                    | 0.0              | 20.8           | 0.0              | 100.0            | 0.0               | 75.4           | 0.0              | 4.9            | 0.0              | 12.2           | 0.0              | 69.0           | 0.0              |
| 548 | Human Plasma exp_2 | 2834         | Ig mu chain C region   | NNSDISSTR_5_3_0_1   | 77.9                                    | 0.0              | 13.5           | 0.0              | 100.0            | 0.0               | 94.9           | 0.0              | 0.0            | 0.0              | 6.3            | 0.0              | 98.2           | 0.0              |
| 549 | Human Plasma exp_3 | 2746         | Ig mu chain C region   | NNSDISSTR_5_3_0_1   | 63.4                                    | 0.0              | 15.9           | 0.0              | 100.0            | 0.0               | 74.5           | 0.0              | 6.8            | 0.0              | 14.7           | 0.0              | 80.8           | 0.0              |
| 550 | Human Plasma exp_4 | 2838         | Ig mu chain C region   | NNSDISSTR_5_3_0_1   | 80.1                                    | 0.0              | 24.4           | 0.0              | 96.4             | 0.0               | 100.0          | 0.0              | 10.5           | 0.0              | 11.2           | 0.0              | 77.2           | 0.0              |
| 551 | Human Plasma exp_5 | 2750         | Ig mu chain C region   | NNSDISSTR_5_3_0_1   | 70.3                                    | 0.0              | 21.4           | 0.0              | 100.0            | 0.0               | 83.0           | 0.0              | 5.5            | 0.0              | 12.2           | 0.0              | 82.5           | 0.0              |
| 552 | Human Plasma exp_4 | 3061         | Ig mu chain C region   | NNSDISSTR_5_3_1_1   | 98.5                                    | 0.0              | 23.1           | 0.0              | 100.0            | 0.0               | 33.0           | 35.0             | 0.0            | 0.0              | 0.0            | 0.0              | 22.9           | 35.3             |
| 553 | Human Plasma exp_2 | 3007         | Ig mu chain C region   | NNSDISSTR_5_4_0_1   | 100.0                                   | 0.0              | 8.6            | 0.0              | 78.3             | 0.0               | 67.4           | 0.0              | 0.0            | 0.0              | 6.4            | 0.0              | 53.1           | 0.0              |
| 554 | Human Plasma exp_2 | 3177         | Ig mu chain C region   | NNSDISSTR_5_4_1_1   | 100.0                                   | 0.0              | 12.0           | 0.0              | 65.0             | 0.0               | 0.0            | 0.0              | 0.0            | 0.0              | 0.0            | 0.0              | 15.5           | 26.0             |
| 555 | Human Plasma exp_2 | 3207         | Ig mu chain C region   | NNSDISSTR_5_4_1_1   | 0.0                                     | 0.0              | 0.0            | 0.0              | 34.5             | 0.0               | 93.9           | 100.0            | 4.1            | 5.9              | 2.8            | 0.0              | 7.1            | 7.9              |
| 556 | Human Plasma exp_5 | 5962         | Ig mu chain C region   | NNSDISSTR_5_4_1_2   | 51.9                                    | 0.0              | 0.0            | 0.0              | 100.0            | 0.0               | 18.5           | 0.0              | 0.0            | 0.0              | 0.0            | 0.0              | 4.8            | 18.4             |
| 557 | Human Plasma exp_4 | 3362         | Ig mu chain C region   | NNSDISSTR_5_5_0_1   | 100.0                                   | 0.0              | 9.7            | 0.0              | 65.4             | 0.0               | 89.4           | 0.0              | 8.9            | 0.0              | 0.0            | 0.0              | 0.0            | 0.0              |
| 558 | Human Plasma exp_5 | 3507         | Ig mu chain C region   | NNSDISSTR_5_5_1_1   | 100.0                                   | 0.0              | 8.5            | 0.0              | 81.6             | 0.0               | 44.0           | 65.9             | 4.6            | 0.0              | 0.0            | 0.0              | 0.0            | 0.0              |
| 559 | Human Plasma exp_1 | 2571         | Ig mu chain C region   | NNSDISSTR_6_3_0_1   | 62.2                                    | 0.0              | 13.5           | 0.0              | 100.0            | 0.0               | 95.3           | 0.0              | 0.0            | 0.0              | 8.6            | 0.0              | 37.5           | 0.0              |
| 560 | Human Plasma exp_2 | 2777         | Ig mu chain C region   | NNSDISSTR_6_3_0_1   | 100.0                                   | 0.0              | 14.2           | 0.0              | 92.8             | 0.0               | 87.3           | 0.0              | 0.0            | 0.0              | 5.5            | 0.0              | 14.9           | 0.0              |
| 561 | Human Plasma exp_3 | 3033         | Ig mu chain C region   | NNSDISSTR_6_3_1_1   | 60.5                                    | 0.0              | 12.9           | 0.0              | 100.0            | 0.0               | 30.0           | 32.2             | 0.0            | 0.0              | 0.0            | 0.0              | 9.7            | 30.7             |
| 562 | Human Plasma exp_4 | 3113         | Ig mu chain C region   | NNSDISSTR_6_3_1_1   | 65.2                                    | 0.0              | 0.0            | 0.0              | 100.0            | 0.0               | 32.1           | 27.3             | 0.0            | 0.0              | 0.0            | 0.0              | 5.0            | 38.5             |
| 563 | Human Plasma exp_1 | 19134        | Immunoglobulin J chain | ENISDPTSPLR_5_3_1_1 | 48.7                                    | 0.0              | 8.0            | 0.0              | 100.0            | 0.0               | 11.2           | 19.4             | 0.0            | 0.0              | 0.0            | 0.0              | 10.6           | 46.0             |
| 564 | Human Plasma exp_3 | 18908        | Immunoglobulin J chain | ENISDPTSPLR_5_3_1_1 | 62.0                                    | 0.0              | 11.0           | 0.0              | 100.0            | 0.0               | 27.4           | 27.2             | 0.0            | 0.0              | 0.0            | 0.0              | 16.1           | 64.0             |
| 565 | Human Plasma exp_4 | 19585        | Immunoglobulin J chain | ENISDPTSPLR_5_3_1_1 | 50.8                                    | 0.0              | 0.0            | 0.0              | 100.0            | 0.0               | 11.5           | 17.7             | 0.0            | 0.0              | 0.0            | 0.0              | 26.7           | 48.7             |
| 566 | Human Plasma exp_5 | 19137        | Immunoglobulin J chain | ENISDPTSPLR_5_3_1_1 | 64.2                                    | 0.0              | 0.0            | 0.0              | 100.0            | 0.0               | 11.1           | 18.3             | 0.0            | 0.0              | 0.0            | 0.0              | 28.7           | 42.1             |
| 567 | Human Plasma exp_2 | 19127        | Immunoglobulin J chain | ENISDPTSPLR_5_4_0_1 | 86.2                                    | 0.0              | 17.1           | 0.0              | 100.0            | 0.0               | 39.7           | 0.0              | 0.0            | 0.0              | 0.0            | 0.0              | 38.5           | 0.0              |
| 568 | Human Plasma exp_1 | 22460        | Immunoglobulin J chain | ENISDPTSPLR_5_4_0_2 | 84.3                                    | 0.0              | 6.2            | 0.0              | 100.0            | 0.0               | 37.6           | 0.0              | 0.0            | 0.0              | 5.4            | 0.0              | 78.4           | 0.0              |
| 569 | Human Plasma exp_1 | 22442        | Immunoglobulin J chain | ENISDPTSPLR_5_4_0_2 | 0.0                                     | 0.0              | 0.0            | 0.0              | 38.3             | 0.0               | 100.0          | 0.0              | 16.0           | 0.0              | 7.2            | 0.0              | 19.6           | 0.0              |
| 570 | Human Plasma exp_2 | 22909        | Immunoglobulin J chain | ENISDPTSPLR_5_4_0_2 | 88.4                                    | 0.0              | 0.0            | 0.0              | 100.0            | 0.0               | 34.7           | 0.0              | 0.0            | 0.0              | 13.2           | 0.0              | 78.3           | 0.0              |
| 571 | Human Plasma exp_2 | 22784        | Immunoglobulin J chain | ENISDPTSPLR_5_4_0_2 | 57.4                                    | 0.0              | 9.6            | 0.0              | 100.0            | 0.0               | 32.4           | 0.0              | 0.0            | 0.0              | 3.5            | 0.0              | 11.9           | 0.0              |
| 572 | Human Plasma exp_3 | 22200        | Immunoglobulin J chain | ENISDPTSPLR_5_4_0_2 | 68.1                                    | 0.0              | 5.0            | 0.0              | 100.0            | 0.0               | 28.5           | 0.0              | 3.5            | 0.0              | 6.0            | 0.0              | 66.6           | 0.0              |

Supplementary Table 3. Continued.

| No. | Experiments        | CID Scan No. | N-glycoproteins                                                        | N-glycopeptides      | Relative intensities of B/Y series ions |                  |                |                  |                  |                   |                |                  |                |                  |                |                  |                |                  |
|-----|--------------------|--------------|------------------------------------------------------------------------|----------------------|-----------------------------------------|------------------|----------------|------------------|------------------|-------------------|----------------|------------------|----------------|------------------|----------------|------------------|----------------|------------------|
|     |                    |              |                                                                        |                      | B <sub>2</sub>                          | B <sub>2</sub> F | B <sub>3</sub> | B <sub>3</sub> F | B <sub>2</sub> S | B <sub>2</sub> SF | Y <sub>1</sub> | Y <sub>1</sub> F | Y <sub>2</sub> | Y <sub>2</sub> F | Y <sub>3</sub> | Y <sub>3</sub> F | Y <sub>4</sub> | Y <sub>4</sub> F |
| 573 | Human Plasma exp_4 | 22776        | Immunoglobulin J chain                                                 | ENISDPTSPLR_5_4_0_2  | 62.5                                    | 0.0              | 5.0            | 0.0              | 100.0            | 0.0               | 29.6           | 0.0              | 0.0            | 0.0              | 0.0            | 0.0              | 67.8           | 0.0              |
| 574 | Human Plasma exp_2 | 15804        | Insulin-like growth factor-binding protein 3                           | GLCVNASAVSR_5_4_0_2  | 45.5                                    | 0.0              | 4.3            | 0.0              | 100.0            | 0.0               | 66.8           | 0.0              | 0.0            | 0.0              | 3.3            | 0.0              | 38.4           | 0.0              |
| 575 | Human Plasma exp_3 | 15524        | Insulin-like growth factor-binding protein 3                           | GLCVNASAVSR_5_4_0_2  | 47.7                                    | 0.0              | 0.0            | 0.0              | 100.0            | 0.0               | 71.4           | 0.0              | 0.0            | 0.0              | 7.0            | 0.0              | 42.8           | 0.0              |
| 576 | Human Plasma exp_2 | 3512         | Insulin-like growth factor-binding protein complex acid labile subunit | NNSLR_4_3_0_1        | 82.6                                    | 0.0              | 0.0            | 0.0              | 87.0             | 0.0               | 34.7           | 0.0              | 9.3            | 0.0              | 0.0            | 0.0              | 100.0          | 0.0              |
| 577 | Human Plasma exp_1 | 3342         | Insulin-like growth factor-binding protein complex acid labile subunit | NNSLR_5_4_0_2        | 52.0                                    | 0.0              | 2.7            | 0.0              | 100.0            | 0.0               | 35.9           | 0.0              | 0.0            | 0.0              | 2.1            | 0.0              | 37.4           | 0.0              |
| 578 | Human Plasma exp_2 | 3432         | Insulin-like growth factor-binding protein complex acid labile subunit | NNSLR_5_4_0_2        | 60.6                                    | 0.0              | 2.3            | 0.0              | 100.0            | 0.0               | 26.7           | 0.0              | 0.0            | 0.0              | 0.0            | 0.0              | 36.9           | 0.0              |
| 579 | Human Plasma exp_3 | 3351         | Insulin-like growth factor-binding protein complex acid labile subunit | NNSLR_5_4_0_2        | 48.7                                    | 0.0              | 5.1            | 0.0              | 100.0            | 0.0               | 22.0           | 0.0              | 0.0            | 0.0              | 2.2            | 0.0              | 35.7           | 0.0              |
| 580 | Human Plasma exp_4 | 3663         | Insulin-like growth factor-binding protein complex acid labile subunit | NNSLR_5_4_0_2        | 61.1                                    | 0.0              | 3.9            | 0.0              | 100.0            | 0.0               | 20.1           | 0.0              | 0.0            | 0.0              | 0.0            | 0.0              | 19.9           | 0.0              |
| 581 | Human Plasma exp_5 | 3367         | Insulin-like growth factor-binding protein complex acid labile subunit | NNSLR_5_4_0_2        | 61.0                                    | 0.0              | 5.8            | 0.0              | 100.0            | 0.0               | 38.7           | 0.0              | 2.2            | 0.0              | 5.9            | 0.0              | 35.8           | 0.0              |
| 582 | Human Plasma exp_2 | 8788         | Inter-alpha-trypsin inhibitor heavy chain H3                           | ENLTAR_5_4_0_2       | 56.6                                    | 0.0              | 0.0            | 0.0              | 100.0            | 0.0               | 11.4           | 0.0              | 0.0            | 0.0              | 1.9            | 0.0              | 18.7           | 0.0              |
| 583 | Human Plasma exp_1 | 13583        | Inter-alpha-trypsin inhibitor heavy chain H3                           | ENLTAR_6_5_0_3       | 36.4                                    | 0.0              | 0.0            | 0.0              | 100.0            | 0.0               | 41.7           | 0.0              | 0.0            | 0.0              | 3.5            | 0.0              | 28.3           | 0.0              |
| 584 | Human Plasma exp_3 | 13750        | Inter-alpha-trypsin inhibitor heavy chain H3                           | ENLTAR_6_5_0_3       | 28.6                                    | 0.0              | 4.0            | 0.0              | 100.0            | 0.0               | 32.2           | 0.0              | 0.0            | 0.0              | 2.6            | 0.0              | 25.4           | 0.0              |
| 585 | Human Plasma exp_4 | 13946        | Inter-alpha-trypsin inhibitor heavy chain H3                           | ENLTAR_6_5_0_3       | 31.1                                    | 0.0              | 0.0            | 0.0              | 100.0            | 0.0               | 37.1           | 0.0              | 1.9            | 0.0              | 0.0            | 0.0              | 49.5           | 0.0              |
| 586 | Human Plasma exp_1 | 22574        | Kininogen-1                                                            | ITYSIVQTNSCK_5_4_0_2 | 68.8                                    | 0.0              | 4.0            | 0.0              | 100.0            | 0.0               | 50.9           | 0.0              | 0.0            | 0.0              | 11.8           | 0.0              | 37.1           | 0.0              |
| 587 | Human Plasma exp_2 | 22988        | Kininogen-1                                                            | ITYSIVQTNSCK_5_4_0_2 | 79.0                                    | 0.0              | 10.1           | 0.0              | 100.0            | 0.0               | 61.5           | 0.0              | 0.0            | 0.0              | 7.8            | 0.0              | 56.1           | 0.0              |
| 588 | Human Plasma exp_3 | 22407        | Kininogen-1                                                            | ITYSIVQTNSCK_5_4_0_2 | 89.4                                    | 0.0              | 10.2           | 0.0              | 100.0            | 0.0               | 56.6           | 0.0              | 0.0            | 0.0              | 15.2           | 0.0              | 56.0           | 0.0              |
| 589 | Human Plasma exp_4 | 22942        | Kininogen-1                                                            | ITYSIVQTNSCK_5_4_0_2 | 85.3                                    | 0.0              | 13.7           | 0.0              | 100.0            | 0.0               | 56.1           | 0.0              | 0.0            | 0.0              | 11.1           | 0.0              | 49.4           | 0.0              |
| 590 | Human Plasma exp_5 | 22388        | Kininogen-1                                                            | ITYSIVQTNSCK_5_4_0_2 | 79.2                                    | 0.0              | 7.0            | 0.0              | 100.0            | 0.0               | 44.4           | 0.0              | 0.0            | 0.0              | 7.2            | 0.0              | 34.7           | 0.0              |
| 591 | Human Plasma exp_1 | 22471        | Kininogen-1                                                            | ITYSIVQTNSCK_5_4_1_2 | 10.0                                    | 0.0              | 6.7            | 0.0              | 100.0            | 0.0               | 36.1           | 6.3              | 0.0            | 0.0              | 0.0            | 0.0              | 0.0            | 0.0              |
| 592 | Human Plasma exp_2 | 26235        | Kininogen-1                                                            | ITYSIVQTNSCK_6_5_1_3 | 40.1                                    | 7.1              | 0.0            | 0.0              | 100.0            | 18.7              | 44.0           | 0.0              | 0.0            | 0.0              | 2.7            | 0.0              | 10.3           | 0.0              |
| 593 | Human Plasma exp_4 | 26128        | Kininogen-1                                                            | ITYSIVQTNSCK_6_5_1_3 | 38.8                                    | 8.4              | 3.5            | 0.0              | 100.0            | 14.8              | 38.2           | 0.0              | 0.0            | 0.0              | 0.0            | 0.0              | 12.4           | 0.0              |
| 594 | Human Plasma exp_5 | 25355        | Kininogen-1                                                            | ITYSIVQTNSCK_6_5_1_3 | 40.7                                    | 3.7              | 0.0            | 0.0              | 100.0            | 20.7              | 41.3           | 0.0              | 0.0            | 0.0              | 0.0            | 0.0              | 16.5           | 0.0              |
| 595 | Human Plasma exp_3 | 26586        | Kininogen-1                                                            | LNAENNATFYFK_5_4_0_2 | 82.5                                    | 0.0              | 10.2           | 0.0              | 100.0            | 0.0               | 27.0           | 0.0              | 0.0            | 0.0              | 0.0            | 0.0              | 60.5           | 0.0              |

**Supplementary Table 3. Continued.**

| No. | Experiments        | CID Scan No. | N-glycoproteins                            | N-glycopeptides         | Relative intensities of B/Y series ions |                  |                |                  |                  |                   |                |                  |                |                  |                |                  |                |                  |
|-----|--------------------|--------------|--------------------------------------------|-------------------------|-----------------------------------------|------------------|----------------|------------------|------------------|-------------------|----------------|------------------|----------------|------------------|----------------|------------------|----------------|------------------|
|     |                    |              |                                            |                         | B <sub>2</sub>                          | B <sub>2</sub> F | B <sub>3</sub> | B <sub>3</sub> F | B <sub>2</sub> S | B <sub>2</sub> SF | Y <sub>1</sub> | Y <sub>1</sub> F | Y <sub>2</sub> | Y <sub>2</sub> F | Y <sub>3</sub> | Y <sub>3</sub> F | Y <sub>4</sub> | Y <sub>4</sub> F |
| 596 | Human Plasma exp_3 | 29339        | Kininogen-1                                | LNAENNATFYFK_6_5_1_3    | 45.4                                    | 0.0              | 0.0            | 0.0              | 100.0            | 10.5              | 20.0           | 2.4              | 0.0            | 0.0              | 0.0            | 0.0              | 0.0            | 0.0              |
| 597 | Human Plasma exp_2 | 25878        | Kininogen-1                                | YNSQSQSNNQFVLYR_5_4_0_2 | 55.0                                    | 0.0              | 0.0            | 0.0              | 100.0            | 0.0               | 77.6           | 0.0              | 0.0            | 0.0              | 18.8           | 0.0              | 73.8           | 0.0              |
| 598 | Human Plasma exp_4 | 25851        | Kininogen-1                                | YNSQSQSNNQFVLYR_5_4_0_2 | 62.2                                    | 0.0              | 0.0            | 0.0              | 100.0            | 0.0               | 57.0           | 0.0              | 7.8            | 0.0              | 17.0           | 0.0              | 63.5           | 0.0              |
| 599 | Human Plasma exp_5 | 25165        | Kininogen-1                                | YNSQSQSNNQFVLYR_5_4_0_2 | 54.5                                    | 0.0              | 0.0            | 0.0              | 100.0            | 0.0               | 81.9           | 0.0              | 1.9            | 0.0              | 0.0            | 0.0              | 62.7           | 0.0              |
| 600 | Human Plasma exp_4 | 25837        | L-selectin                                 | DNYTDLVAIQNK_5_4_0_2    | 23.4                                    | 0.0              | 8.3            | 0.0              | 100.0            | 0.0               | 6.1            | 0.0              | 0.0            | 0.0              | 0.0            | 0.0              | 3.5            | 0.0              |
| 601 | Human Plasma exp_1 | 12687        | Phosphatidylcholine-sterol acyltransferase | VVYNR_6_5_0_3           | 31.1                                    | 0.0              | 3.7            | 0.0              | 100.0            | 0.0               | 50.0           | 0.0              | 0.0            | 0.0              | 7.0            | 0.0              | 29.4           | 0.0              |
| 602 | Human Plasma exp_2 | 12915        | Phosphatidylcholine-sterol acyltransferase | VVYNR_6_5_0_3           | 31.5                                    | 0.0              | 0.0            | 0.0              | 100.0            | 0.0               | 28.9           | 0.0              | 0.0            | 0.0              | 1.8            | 0.0              | 25.1           | 0.0              |
| 603 | Human Plasma exp_4 | 12966        | Phosphatidylcholine-sterol acyltransferase | VVYNR_6_5_0_3           | 40.1                                    | 0.0              | 0.0            | 0.0              | 100.0            | 0.0               | 27.5           | 0.0              | 0.0            | 0.0              | 1.8            | 0.0              | 23.8           | 0.0              |
| 604 | Human Plasma exp_5 | 12785        | Phosphatidylcholine-sterol acyltransferase | VVYNR_6_5_0_3           | 39.5                                    | 0.0              | 0.0            | 0.0              | 100.0            | 0.0               | 30.7           | 0.0              | 0.0            | 0.0              | 3.4            | 0.0              | 34.5           | 0.0              |
| 605 | Human Plasma exp_1 | 23404        | Phospholipid transfer protein              | NWSLPNR_5_4_1_2         | 48.7                                    | 0.0              | 6.3            | 0.0              | 100.0            | 0.0               | 3.4            | 12.7             | 0.0            | 0.0              | 0.0            | 0.0              | 0.0            | 0.0              |
| 606 | Human Plasma exp_5 | 23324        | Phospholipid transfer protein              | NWSLPNR_5_4_1_2         | 58.1                                    | 0.0              | 4.9            | 0.0              | 100.0            | 0.0               | 10.7           | 17.6             | 0.0            | 0.0              | 0.0            | 0.0              | 2.6            | 29.1             |
| 607 | Human Plasma exp_2 | 20184        | Plasma kallikrein                          | GVNFNVSK_5_4_0_2        | 0.0                                     | 0.0              | 0.0            | 0.0              | 60.5             | 0.0               | 100.0          | 0.0              | 21.1           | 0.0              | 8.7            | 0.0              | 41.1           | 0.0              |
| 608 | Human Plasma exp_5 | 19816        | Plasma kallikrein                          | GVNFNVSK_5_4_0_2        | 53.0                                    | 0.0              | 4.7            | 0.0              | 100.0            | 0.0               | 41.2           | 0.0              | 0.0            | 0.0              | 5.6            | 0.0              | 34.5           | 0.0              |
| 609 | Human Plasma exp_1 | 4851         | Plasma serine protease inhibitor           | NLSCR_5_4_0_2           | 54.5                                    | 0.0              | 0.0            | 0.0              | 100.0            | 0.0               | 32.2           | 0.0              | 0.0            | 0.0              | 5.6            | 0.0              | 31.9           | 0.0              |
| 610 | Human Plasma exp_2 | 4939         | Plasma serine protease inhibitor           | NLSCR_5_4_0_2           | 55.0                                    | 0.0              | 5.2            | 0.0              | 100.0            | 0.0               | 33.0           | 0.0              | 0.0            | 0.0              | 4.3            | 0.0              | 36.8           | 0.0              |
| 611 | Human Plasma exp_4 | 5038         | Plasma serine protease inhibitor           | NLSCR_5_4_0_2           | 58.5                                    | 0.0              | 3.7            | 0.0              | 100.0            | 0.0               | 30.0           | 0.0              | 0.0            | 0.0              | 5.9            | 0.0              | 34.6           | 0.0              |
| 612 | Human Plasma exp_5 | 4877         | Plasma serine protease inhibitor           | NLSCR_5_4_0_2           | 49.1                                    | 0.0              | 2.3            | 0.0              | 100.0            | 0.0               | 40.6           | 0.0              | 1.0            | 0.0              | 2.1            | 0.0              | 33.9           | 0.0              |
| 613 | Human Plasma exp_3 | 5241         | Prothrombin                                | GHVNITR_4_3_0_1         | 41.1                                    | 0.0              | 0.0            | 0.0              | 43.4             | 0.0               | 100.0          | 0.0              | 3.0            | 0.0              | 0.0            | 0.0              | 86.7           | 0.0              |
| 614 | Human Plasma exp_4 | 5405         | Prothrombin                                | GHVNITR_4_3_0_1         | 47.1                                    | 0.0              | 0.0            | 0.0              | 25.6             | 0.0               | 95.3           | 0.0              | 5.4            | 0.0              | 2.7            | 0.0              | 100.0          | 0.0              |
| 615 | Human Plasma exp_5 | 5223         | Prothrombin                                | GHVNITR_4_3_0_1         | 41.1                                    | 0.0              | 0.0            | 0.0              | 29.2             | 0.0               | 100.0          | 0.0              | 9.9            | 0.0              | 0.0            | 0.0              | 82.4           | 0.0              |
| 616 | Human Plasma exp_1 | 5324         | Prothrombin                                | GHVNITR_5_4_1_2         | 82.7                                    | 0.0              | 0.0            | 0.0              | 100.0            | 19.2              | 12.2           | 0.0              | 0.0            | 0.0              | 0.0            | 0.0              | 14.2           | 0.0              |
| 617 | Human Plasma exp_4 | 5480         | Prothrombin                                | GHVNITR_5_4_1_2         | 72.3                                    | 6.8              | 0.0            | 0.0              | 100.0            | 12.2              | 4.8            | 0.0              | 0.0            | 0.0              | 0.0            | 0.0              | 4.1            | 0.0              |
| 618 | Human Plasma exp_2 | 27844        | Prothrombin                                | NFTENDLLVR_5_4_0_2      | 74.9                                    | 0.0              | 7.7            | 0.0              | 100.0            | 0.0               | 67.7           | 0.0              | 0.0            | 0.0              | 5.2            | 0.0              | 44.0           | 0.0              |
| 619 | Human Plasma exp_2 | 27820        | Prothrombin                                | NFTENDLLVR_5_4_0_2      | 41.2                                    | 0.0              | 3.8            | 0.0              | 100.0            | 0.0               | 56.8           | 0.0              | 0.0            | 0.0              | 0.0            | 0.0              | 33.6           | 0.0              |
| 620 | Human Plasma exp_3 | 27242        | Prothrombin                                | NFTENDLLVR_5_4_0_2      | 80.1                                    | 0.0              | 10.0           | 0.0              | 100.0            | 0.0               | 53.5           | 0.0              | 0.0            | 0.0              | 10.7           | 0.0              | 47.9           | 0.0              |
| 621 | Human Plasma exp_3 | 27228        | Prothrombin                                | NFTENDLLVR_5_4_0_2      | 47.5                                    | 0.0              | 0.0            | 0.0              | 100.0            | 0.0               | 52.7           | 0.0              | 0.0            | 0.0              | 3.0            | 0.0              | 40.5           | 0.0              |

**Supplementary Table 3. Continued.**

| No. | Experiments        | CID Scan No. | N-glycoproteins               | N-glycopeptides          | Relative intensities of B/Y series ions |                  |                |                  |                  |                   |                |                  |                |                  |                |                  |                |                  |
|-----|--------------------|--------------|-------------------------------|--------------------------|-----------------------------------------|------------------|----------------|------------------|------------------|-------------------|----------------|------------------|----------------|------------------|----------------|------------------|----------------|------------------|
|     |                    |              |                               |                          | B <sub>2</sub>                          | B <sub>2</sub> F | B <sub>3</sub> | B <sub>3</sub> F | B <sub>2</sub> S | B <sub>2</sub> SF | Y <sub>1</sub> | Y <sub>1</sub> F | Y <sub>2</sub> | Y <sub>2</sub> F | Y <sub>3</sub> | Y <sub>3</sub> F | Y <sub>4</sub> | Y <sub>4</sub> F |
| 623 | Human Plasma exp_1 | 28401        | Serotransferrin               | CGLVPVLAENYNK_4_3_0_1    | 40.2                                    | 0.0              | 0.0            | 0.0              | 85.2             | 0.0               | 58.6           | 0.0              | 0.0            | 0.0              | 4.0            | 0.0              | 100.0          | 0.0              |
| 622 | Human Plasma exp_4 | 27606        | Prothrombin                   | NFTENDLLVR_5_4_0_2       | 77.6                                    | 0.0              | 0.0            | 0.0              | 100.0            | 0.0               | 78.9           | 0.0              | 6.2            | 0.0              | 17.6           | 0.0              | 39.7           | 0.0              |
| 624 | Human Plasma exp_2 | 29120        | Serotransferrin               | CGLVPVLAENYNK_4_3_0_1    | 57.3                                    | 0.0              | 0.0            | 0.0              | 83.8             | 0.0               | 83.8           | 0.0              | 4.0            | 0.0              | 6.8            | 0.0              | 100.0          | 0.0              |
| 625 | Human Plasma exp_3 | 28600        | Serotransferrin               | CGLVPVLAENYNK_4_3_0_1    | 42.8                                    | 0.0              | 7.0            | 0.0              | 85.5             | 0.0               | 89.4           | 0.0              | 7.0            | 0.0              | 0.0            | 0.0              | 100.0          | 0.0              |
| 626 | Human Plasma exp_4 | 28899        | Serotransferrin               | CGLVPVLAENYNK_4_3_0_1    | 28.7                                    | 0.0              | 0.0            | 0.0              | 59.7             | 0.0               | 82.6           | 0.0              | 10.6           | 0.0              | 4.8            | 0.0              | 100.0          | 0.0              |
| 627 | Human Plasma exp_5 | 28083        | Serotransferrin               | CGLVPVLAENYNK_4_3_0_1    | 28.5                                    | 0.0              | 4.5            | 0.0              | 56.9             | 0.0               | 76.5           | 0.0              | 0.0            | 0.0              | 15.5           | 0.0              | 100.0          | 0.0              |
| 628 | Human Plasma exp_4 | 26451        | Serotransferrin               | CGLVPVLAENYNK_5_4_0_1    | 100.0                                   | 0.0              | 5.3            | 0.0              | 50.8             | 0.0               | 46.3           | 0.0              | 0.0            | 0.0              | 14.3           | 0.0              | 53.2           | 0.0              |
| 629 | Human Plasma exp_1 | 28364        | Serotransferrin               | CGLVPVLAENYNK_5_4_0_2    | 55.3                                    | 0.0              | 4.2            | 0.0              | 100.0            | 0.0               | 70.2           | 0.0              | 5.9            | 0.0              | 11.6           | 0.0              | 52.5           | 0.0              |
| 630 | Human Plasma exp_2 | 29354        | Serotransferrin               | CGLVPVLAENYNK_5_4_0_2    | 75.6                                    | 0.0              | 0.0            | 0.0              | 100.0            | 0.0               | 61.1           | 0.0              | 0.0            | 0.0              | 7.0            | 0.0              | 54.5           | 0.0              |
| 631 | Human Plasma exp_3 | 28548        | Serotransferrin               | CGLVPVLAENYNK_5_4_0_2    | 66.8                                    | 0.0              | 0.0            | 0.0              | 100.0            | 0.0               | 66.1           | 0.0              | 0.0            | 0.0              | 3.8            | 0.0              | 62.1           | 0.0              |
| 632 | Human Plasma exp_4 | 29121        | Serotransferrin               | CGLVPVLAENYNK_5_4_0_2    | 52.6                                    | 0.0              | 9.4            | 0.0              | 96.0             | 0.0               | 61.8           | 0.0              | 3.6            | 0.0              | 5.5            | 0.0              | 100.0          | 0.0              |
| 633 | Human Plasma exp_5 | 28179        | Serotransferrin               | CGLVPVLAENYNK_5_4_0_2    | 58.7                                    | 0.0              | 7.8            | 0.0              | 100.0            | 0.0               | 81.6           | 0.0              | 6.4            | 0.0              | 17.1           | 0.0              | 66.3           | 0.0              |
| 634 | Human Plasma exp_3 | 23286        | Sex hormone-binding globulin  | LDVDQALNR_5_4_0_2        | 48.4                                    | 0.0              | 12.7           | 0.0              | 100.0            | 0.0               | 36.5           | 0.0              | 0.0            | 0.0              | 0.0            | 0.0              | 11.3           | 0.0              |
| 635 | Human Plasma exp_4 | 13511        | Thyroxine-binding globulin    | VTACHSSQP NATLYK_5_4_0_2 | 17.4                                    | 0.0              | 0.0            | 0.0              | 100.0            | 0.0               | 97.2           | 0.0              | 19.5           | 0.0              | 0.0            | 0.0              | 41.2           | 0.0              |
| 636 | Human Plasma exp_1 | 17101        | Vitamin K-dependent protein C | EVFVHPNYSK_5_4_0_2       | 100.0                                   | 0.0              | 0.0            | 0.0              | 76.2             | 0.0               | 5.1            | 0.0              | 0.0            | 0.0              | 3.8            | 0.0              | 48.1           | 0.0              |
| 637 | Human Plasma exp_2 | 17448        | Vitamin K-dependent protein C | EVFVHPNYSK_5_4_0_2       | 100.0                                   | 0.0              | 0.0            | 0.0              | 77.7             | 0.0               | 19.9           | 0.0              | 0.0            | 0.0              | 3.1            | 0.0              | 52.4           | 0.0              |
| 638 | Human Plasma exp_1 | 24845        | Vitronectin                   | NGSLFAFR_4_3_0_1         | 85.1                                    | 0.0              | 31.0           | 0.0              | 97.7             | 0.0               | 100.0          | 0.0              | 11.3           | 0.0              | 26.0           | 0.0              | 0.0            | 0.0              |
| 639 | Human Plasma exp_2 | 25338        | Vitronectin                   | NGSLFAFR_4_3_0_1         | 78.7                                    | 0.0              | 12.7           | 0.0              | 88.4             | 0.0               | 100.0          | 0.0              | 5.2            | 0.0              | 23.8           | 0.0              | 0.0            | 0.0              |
| 640 | Human Plasma exp_3 | 24827        | Vitronectin                   | NGSLFAFR_4_3_0_1         | 58.5                                    | 0.0              | 19.7           | 0.0              | 89.4             | 0.0               | 100.0          | 0.0              | 3.5            | 0.0              | 11.8           | 0.0              | 0.0            | 0.0              |
| 641 | Human Plasma exp_4 | 25323        | Vitronectin                   | NGSLFAFR_4_3_0_1         | 57.7                                    | 0.0              | 8.5            | 0.0              | 66.0             | 0.0               | 100.0          | 0.0              | 2.8            | 0.0              | 8.8            | 0.0              | 0.0            | 0.0              |
| 642 | Human Plasma exp_5 | 24584        | Vitronectin                   | NGSLFAFR_4_3_0_1         | 56.2                                    | 0.0              | 9.7            | 0.0              | 73.2             | 0.0               | 100.0          | 0.0              | 5.0            | 0.0              | 11.2           | 0.0              | 0.0            | 0.0              |
| 643 | Human Plasma exp_1 | 24613        | Vitronectin                   | NGSLFAFR_5_3_0_1         | 68.9                                    | 0.0              | 19.5           | 0.0              | 91.2             | 0.0               | 100.0          | 0.0              | 0.0            | 0.0              | 16.8           | 0.0              | 59.2           | 0.0              |
| 644 | Human Plasma exp_2 | 25113        | Vitronectin                   | NGSLFAFR_5_3_0_1         | 83.4                                    | 0.0              | 22.5           | 0.0              | 100.0            | 0.0               | 99.1           | 0.0              | 0.0            | 0.0              | 21.2           | 0.0              | 50.1           | 0.0              |
| 645 | Human Plasma exp_3 | 24606        | Vitronectin                   | NGSLFAFR_5_3_0_1         | 68.7                                    | 0.0              | 12.0           | 0.0              | 100.0            | 0.0               | 95.4           | 0.0              | 8.5            | 0.0              | 3.9            | 0.0              | 55.8           | 0.0              |
| 646 | Human Plasma exp_4 | 25094        | Vitronectin                   | NGSLFAFR_5_3_0_1         | 73.3                                    | 0.0              | 10.1           | 0.0              | 100.0            | 0.0               | 75.4           | 0.0              | 0.0            | 0.0              | 0.0            | 0.0              | 32.7           | 0.0              |
| 647 | Human Plasma exp_5 | 24407        | Vitronectin                   | NGSLFAFR_5_3_0_1         | 69.6                                    | 0.0              | 20.8           | 0.0              | 98.7             | 0.0               | 100.0          | 0.0              | 13.5           | 0.0              | 12.3           | 0.0              | 62.0           | 0.0              |

**Supplementary Table 3. Continued.**

| No. | Experiments        | CID Scan No. | N-glycoproteins           | N-glycopeptides                 | Relative intensities of B/Y series ions |                  |                |                  |                  |                   |                |                  |                |                  |                |                  |                |                  |
|-----|--------------------|--------------|---------------------------|---------------------------------|-----------------------------------------|------------------|----------------|------------------|------------------|-------------------|----------------|------------------|----------------|------------------|----------------|------------------|----------------|------------------|
|     |                    |              |                           |                                 | B <sub>2</sub>                          | B <sub>2</sub> F | B <sub>3</sub> | B <sub>3</sub> F | B <sub>2</sub> S | B <sub>2</sub> SF | Y <sub>1</sub> | Y <sub>1</sub> F | Y <sub>2</sub> | Y <sub>2</sub> F | Y <sub>3</sub> | Y <sub>3</sub> F | Y <sub>4</sub> | Y <sub>4</sub> F |
| 648 | Human Plasma exp_1 | 24402        | Vitronectin               | NGSLFAFR_5_4_0_1                | 100.0                                   | 0.0              | 6.8            | 0.0              | 62.1             | 0.0               | 23.4           | 0.0              | 0.0            | 0.0              | 0.0            | 0.0              | 29.3           | 0.0              |
| 649 | Human Plasma exp_3 | 24438        | Vitronectin               | NGSLFAFR_5_4_0_1                | 100.0                                   | 0.0              | 7.7            | 0.0              | 64.7             | 0.0               | 48.9           | 0.0              | 0.0            | 0.0              | 3.3            | 0.0              | 35.3           | 0.0              |
| 650 | Human Plasma exp_4 | 25041        | Vitronectin               | NGSLFAFR_5_4_0_1                | 100.0                                   | 0.0              | 3.8            | 0.0              | 70.4             | 0.0               | 43.1           | 0.0              | 0.0            | 0.0              | 0.0            | 0.0              | 33.8           | 0.0              |
| 651 | Human Plasma exp_5 | 24199        | Vitronectin               | NGSLFAFR_5_4_0_1                | 100.0                                   | 0.0              | 6.8            | 0.0              | 72.7             | 0.0               | 53.2           | 0.0              | 0.0            | 0.0              | 3.5            | 0.0              | 40.4           | 0.0              |
| 652 | Human Plasma exp_1 | 27909        | Vitronectin               | NGSLFAFR_5_4_0_2                | 47.4                                    | 0.0              | 4.9            | 0.0              | 100.0            | 0.0               | 56.3           | 0.0              | 3.6            | 0.0              | 8.3            | 0.0              | 44.3           | 0.0              |
| 653 | Human Plasma exp_1 | 27933        | Vitronectin               | NGSLFAFR_5_4_0_2                | 0.0                                     | 0.0              | 0.0            | 0.0              | 49.5             | 0.0               | 100.0          | 0.0              | 9.8            | 0.0              | 2.2            | 0.0              | 13.7           | 0.0              |
| 654 | Human Plasma exp_2 | 28613        | Vitronectin               | NGSLFAFR_5_4_0_2                | 49.4                                    | 0.0              | 5.2            | 0.0              | 100.0            | 0.0               | 54.3           | 0.0              | 3.7            | 0.0              | 7.0            | 0.0              | 41.5           | 0.0              |
| 655 | Human Plasma exp_5 | 27590        | Vitronectin               | NGSLFAFR_5_4_0_2                | 50.4                                    | 0.0              | 5.3            | 0.0              | 100.0            | 0.0               | 54.8           | 0.0              | 4.4            | 0.0              | 7.7            | 0.0              | 45.7           | 0.0              |
| 656 | Human Plasma exp_4 | 28463        | Vitronectin               | NGSLFAFR_5_4_1_2                | 22.0                                    | 0.0              | 0.0            | 0.0              | 100.0            | 27.2              | 39.7           | 0.0              | 0.0            | 0.0              | 0.0            | 0.0              | 13.3           | 0.0              |
| 657 | Human Plasma exp_1 | 24437        | Vitronectin               | NGSLFAFR_6_3_0_1                | 65.8                                    | 0.0              | 8.1            | 0.0              | 100.0            | 0.0               | 90.4           | 0.0              | 3.2            | 0.0              | 0.0            | 0.0              | 28.9           | 0.0              |
| 658 | Human Plasma exp_2 | 24915        | Vitronectin               | NGSLFAFR_6_3_0_1                | 64.8                                    | 0.0              | 9.9            | 0.0              | 100.0            | 0.0               | 51.4           | 0.0              | 0.0            | 0.0              | 3.7            | 0.0              | 34.0           | 0.0              |
| 659 | Human Plasma exp_3 | 24459        | Vitronectin               | NGSLFAFR_6_3_0_1                | 61.6                                    | 0.0              | 12.5           | 0.0              | 100.0            | 0.0               | 74.6           | 0.0              | 0.0            | 0.0              | 6.0            | 0.0              | 23.5           | 0.0              |
| 660 | Human Plasma exp_4 | 24929        | Vitronectin               | NGSLFAFR_6_3_0_1                | 79.1                                    | 0.0              | 11.6           | 0.0              | 100.0            | 0.0               | 85.6           | 0.0              | 0.0            | 0.0              | 0.0            | 0.0              | 24.4           | 0.0              |
| 661 | Human Plasma exp_5 | 24229        | Vitronectin               | NGSLFAFR_6_3_0_1                | 69.3                                    | 0.0              | 14.5           | 0.0              | 98.4             | 0.0               | 100.0          | 0.0              | 0.0            | 0.0              | 4.3            | 0.0              | 26.7           | 0.0              |
| 662 | Human Plasma exp_2 | 31304        | Vitronectin               | NGSLFAFR_6_5_1_3                | 0.0                                     | 0.0              | 0.0            | 0.0              | 100.0            | 29.7              | 55.8           | 0.0              | 0.0            | 0.0              | 3.5            | 0.0              | 48.5           | 0.0              |
| 663 | Human Plasma exp_3 | 30798        | Vitronectin               | NGSLFAFR_6_5_1_3                | 0.0                                     | 6.8              | 0.0            | 0.0              | 100.0            | 30.9              | 64.1           | 0.0              | 0.0            | 0.0              | 0.0            | 0.0              | 50.6           | 0.0              |
| 664 | Human Plasma exp_4 | 31068        | Vitronectin               | NGSLFAFR_6_5_1_3                | 5.4                                     | 0.0              | 0.0            | 0.0              | 100.0            | 33.4              | 67.2           | 0.0              | 0.0            | 0.0              | 0.0            | 0.0              | 40.3           | 0.0              |
| 665 | Human Plasma exp_3 | 21145        | Vitronectin               | NNATVHEQVGGPSLTSDLQAQSK_5_4_0_2 | 67.1                                    | 0.0              | 4.5            | 0.0              | 100.0            | 0.0               | 78.5           | 0.0              | 12.1           | 0.0              | 0.0            | 0.0              | 71.4           | 0.0              |
| 666 | Human Plasma exp_4 | 21736        | Vitronectin               | NNATVHEQVGGPSLTSDLQAQSK_5_4_0_2 | 84.6                                    | 0.0              | 7.3            | 0.0              | 100.0            | 0.0               | 74.6           | 0.0              | 9.2            | 0.0              | 31.6           | 0.0              | 67.7           | 0.0              |
| 667 | Human Plasma exp_1 | 16030        | Zinc-alpha-2-glycoprotein | FGCEIENNR_5_4_0_2               | 41.1                                    | 0.0              | 0.0            | 0.0              | 100.0            | 0.0               | 4.8            | 0.0              | 0.0            | 0.0              | 2.8            | 0.0              | 11.8           | 0.0              |
| 668 | Human Plasma exp_2 | 16224        | Zinc-alpha-2-glycoprotein | FGCEIENNR_5_4_0_2               | 74.6                                    | 0.0              | 6.7            | 0.0              | 100.0            | 0.0               | 22.6           | 0.0              | 0.0            | 0.0              | 0.0            | 0.0              | 63.6           | 0.0              |
| 669 | Human Plasma exp_3 | 15877        | Zinc-alpha-2-glycoprotein | FGCEIENNR_5_4_0_2               | 62.9                                    | 0.0              | 3.9            | 0.0              | 100.0            | 0.0               | 31.9           | 0.0              | 0.0            | 0.0              | 1.9            | 0.0              | 53.7           | 0.0              |
| 670 | Human Plasma exp_4 | 16245        | Zinc-alpha-2-glycoprotein | FGCEIENNR_5_4_0_2               | 68.2                                    | 0.0              | 4.2            | 0.0              | 100.0            | 0.0               | 37.9           | 0.0              | 2.5            | 0.0              | 6.8            | 0.0              | 48.2           | 0.0              |
| 671 | Human Plasma exp_5 | 15970        | Zinc-alpha-2-glycoprotein | FGCEIENNR_5_4_0_2               | 74.4                                    | 0.0              | 5.3            | 0.0              | 100.0            | 0.0               | 24.5           | 0.0              | 0.0            | 0.0              | 0.0            | 0.0              | 45.3           | 0.0              |

**Supplementary Table 4.** Models generated by deep neural network for fucosylation classification.

| No. | node | layers | replicate | epoch | Test_Accuracy | Test_AUC | Euclidean length |
|-----|------|--------|-----------|-------|---------------|----------|------------------|
| 1   | 64   | 4      | 8         | 10000 | 0.9898        | 0.998971 | 1.406288         |
| 2   | 64   | 4      | 5         | 5000  | 0.9898        | 0.998640 | 1.406054         |
| 3   | 64   | 3      | 9         | 10000 | 0.9898        | 0.997255 | 1.405070         |
| 4   | 64   | 3      | 9         | 20000 | 0.9898        | 0.997073 | 1.404941         |
| 5   | 32   | 3      | 1         | 10000 | 0.9898        | 0.996905 | 1.404822         |
| 6   | 32   | 3      | 7         | 10000 | 0.9898        | 0.996827 | 1.404767         |
| 7   | 128  | 5      | 9         | 20000 | 0.9873        | 0.999068 | 1.404599         |
| 8   | 64   | 4      | 9         | 5000  | 0.9873        | 0.998478 | 1.404180         |
| 9   | 128  | 4      | 1         | 5000  | 0.9898        | 0.995934 | 1.404133         |
| 10  | 128  | 5      | 7         | 2000  | 0.9898        | 0.995934 | 1.404133         |
| 11  | 128  | 5      | 5         | 10000 | 0.9873        | 0.998401 | 1.404124         |
| 12  | 128  | 4      | 6         | 5000  | 0.9898        | 0.995856 | 1.404078         |
| 13  | 64   | 3      | 9         | 5000  | 0.9873        | 0.998265 | 1.404028         |
| 14  | 128  | 4      | 7         | 10000 | 0.9873        | 0.998109 | 1.403917         |
| 15  | 32   | 3      | 9         | 20000 | 0.9873        | 0.998109 | 1.403917         |
| 16  | 128  | 5      | 9         | 5000  | 0.9873        | 0.998071 | 1.403890         |
| 17  | 64   | 3      | 3         | 5000  | 0.9873        | 0.998019 | 1.403853         |
| 18  | 128  | 5      | 6         | 10000 | 0.9873        | 0.997896 | 1.403765         |
| 19  | 64   | 3      | 1         | 5000  | 0.9898        | 0.995397 | 1.403752         |
| 20  | 128  | 4      | 9         | 10000 | 0.9898        | 0.995189 | 1.403605         |
| 21  | 128  | 3      | 7         | 10000 | 0.9898        | 0.995073 | 1.403522         |
| 22  | 32   | 3      | 8         | 20000 | 0.9873        | 0.997533 | 1.403508         |
| 23  | 128  | 3      | 9         | 2000  | 0.9898        | 0.995034 | 1.403494         |
| 24  | 64   | 4      | 3         | 10000 | 0.9898        | 0.994969 | 1.403449         |
| 25  | 32   | 5      | 5         | 5000  | 0.9873        | 0.997423 | 1.403429         |
| 26  | 128  | 5      | 8         | 2000  | 0.9898        | 0.994801 | 1.403329         |
| 27  | 128  | 4      | 9         | 2000  | 0.9898        | 0.994775 | 1.403311         |
| 28  | 128  | 5      | 7         | 5000  | 0.9873        | 0.997248 | 1.403305         |
| 29  | 64   | 3      | 5         | 5000  | 0.9924        | 0.991971 | 1.403163         |
| 30  | 32   | 3      | 10        | 20000 | 0.9847        | 0.999579 | 1.403137         |
| 31  | 128  | 3      | 8         | 10000 | 0.9898        | 0.994445 | 1.403077         |
| 32  | 128  | 5      | 10        | 20000 | 0.9873        | 0.996925 | 1.403075         |
| 33  | 128  | 3      | 8         | 2000  | 0.9898        | 0.994432 | 1.403068         |
| 34  | 128  | 3      | 8         | 5000  | 0.9873        | 0.996905 | 1.403061         |
| 35  | 64   | 4      | 5         | 20000 | 0.9873        | 0.996866 | 1.403034         |
| 36  | 64   | 4      | 10        | 5000  | 0.9873        | 0.996834 | 1.403011         |
| 37  | 128  | 3      | 9         | 20000 | 0.9873        | 0.996724 | 1.402933         |
| 38  | 16   | 3      | 1         | 10000 | 0.9847        | 0.999255 | 1.402906         |
| 39  | 64   | 3      | 5         | 10000 | 0.9898        | 0.994199 | 1.402902         |
| 40  | 128  | 5      | 10        | 5000  | 0.9873        | 0.996646 | 1.402877         |
| 41  | 16   | 3      | 10        | 10000 | 0.9873        | 0.996575 | 1.402827         |
| 42  | 128  | 4      | 8         | 10000 | 0.9847        | 0.999113 | 1.402805         |
| 43  | 128  | 3      | 2         | 10000 | 0.9873        | 0.996543 | 1.402804         |
| 44  | 64   | 4      | 4         | 10000 | 0.9873        | 0.996471 | 1.402753         |
| 45  | 128  | 3      | 2         | 2000  | 0.9898        | 0.993940 | 1.402719         |
| 46  | 64   | 4      | 4         | 5000  | 0.9898        | 0.993927 | 1.402710         |
| 47  | 32   | 3      | 2         | 5000  | 0.9898        | 0.993862 | 1.402664         |
| 48  | 16   | 4      | 8         | 10000 | 0.9847        | 0.998835 | 1.402606         |
| 49  | 32   | 3      | 2         | 10000 | 0.9847        | 0.998744 | 1.402542         |
| 50  | 64   | 3      | 4         | 20000 | 0.9873        | 0.996141 | 1.402519         |
| 51  | 32   | 3      | 1         | 20000 | 0.9847        | 0.998647 | 1.402473         |
| 52  | 128  | 3      | 8         | 20000 | 0.9873        | 0.996018 | 1.402431         |

**Supplementary Table 4. Continued.**

| No. | node | layers | replicate | epoch | Test_Accuracy | Test_AUC | Euclidean length |
|-----|------|--------|-----------|-------|---------------|----------|------------------|
| 53  | 32   | 4      | 2         | 5000  | 0.9873        | 0.995986 | 1.402408         |
| 54  | 128  | 5      | 2         | 10000 | 0.9873        | 0.995915 | 1.402358         |
| 55  | 128  | 3      | 5         | 10000 | 0.9873        | 0.995902 | 1.402348         |
| 56  | 128  | 3      | 6         | 10000 | 0.9873        | 0.995804 | 1.402279         |
| 57  | 16   | 3      | 5         | 20000 | 0.9847        | 0.998355 | 1.402265         |
| 58  | 64   | 3      | 6         | 20000 | 0.9898        | 0.993215 | 1.402205         |
| 59  | 128  | 4      | 5         | 10000 | 0.9873        | 0.995597 | 1.402132         |
| 60  | 32   | 4      | 8         | 20000 | 0.9873        | 0.995578 | 1.402119         |
| 61  | 128  | 3      | 7         | 20000 | 0.9873        | 0.995520 | 1.402077         |
| 62  | 128  | 5      | 5         | 20000 | 0.9873        | 0.995435 | 1.402017         |
| 63  | 64   | 3      | 7         | 20000 | 0.9873        | 0.995351 | 1.401958         |
| 64  | 128  | 4      | 1         | 2000  | 0.9898        | 0.992833 | 1.401935         |
| 65  | 128  | 3      | 1         | 5000  | 0.9873        | 0.995261 | 1.401893         |
| 66  | 64   | 3      | 3         | 20000 | 0.9847        | 0.997773 | 1.401850         |
| 67  | 128  | 3      | 2         | 5000  | 0.9873        | 0.995163 | 1.401824         |
| 68  | 32   | 3      | 3         | 5000  | 0.9873        | 0.995157 | 1.401820         |
| 69  | 32   | 3      | 6         | 10000 | 0.9873        | 0.995151 | 1.401815         |
| 70  | 32   | 3      | 5         | 5000  | 0.9873        | 0.995118 | 1.401792         |
| 71  | 128  | 3      | 5         | 20000 | 0.9873        | 0.995105 | 1.401783         |
| 72  | 64   | 4      | 2         | 2000  | 0.9898        | 0.992606 | 1.401774         |
| 73  | 64   | 3      | 4         | 10000 | 0.9873        | 0.994969 | 1.401686         |
| 74  | 128  | 4      | 5         | 5000  | 0.9873        | 0.994943 | 1.401668         |
| 75  | 64   | 5      | 2         | 10000 | 0.9847        | 0.997475 | 1.401638         |
| 76  | 64   | 5      | 5         | 5000  | 0.9873        | 0.994717 | 1.401507         |
| 77  | 64   | 3      | 2         | 2000  | 0.9898        | 0.992198 | 1.401485         |
| 78  | 64   | 3      | 7         | 10000 | 0.9847        | 0.997145 | 1.401403         |
| 79  | 128  | 4      | 6         | 10000 | 0.9847        | 0.997099 | 1.401371         |
| 80  | 128  | 4      | 5         | 20000 | 0.9873        | 0.994510 | 1.401360         |
| 81  | 128  | 3      | 5         | 2000  | 0.9873        | 0.994497 | 1.401351         |
| 82  | 32   | 3      | 5         | 20000 | 0.9847        | 0.997048 | 1.401334         |
| 83  | 64   | 4      | 8         | 5000  | 0.9873        | 0.994438 | 1.401310         |
| 84  | 128  | 5      | 5         | 5000  | 0.9873        | 0.994432 | 1.401305         |
| 85  | 128  | 3      | 7         | 2000  | 0.9873        | 0.994386 | 1.401273         |
| 86  | 128  | 3      | 2         | 20000 | 0.9847        | 0.996957 | 1.401270         |
| 87  | 64   | 4      | 4         | 20000 | 0.9873        | 0.994367 | 1.401259         |
| 88  | 64   | 3      | 8         | 20000 | 0.9822        | 0.999404 | 1.401259         |
| 89  | 128  | 4      | 3         | 10000 | 0.9873        | 0.994244 | 1.401172         |
| 90  | 64   | 4      | 2         | 10000 | 0.9847        | 0.996717 | 1.401099         |
| 91  | 64   | 5      | 7         | 20000 | 0.9873        | 0.994011 | 1.401006         |
| 92  | 64   | 4      | 5         | 10000 | 0.9847        | 0.996484 | 1.400934         |
| 93  | 32   | 4      | 4         | 5000  | 0.9873        | 0.993830 | 1.400878         |
| 94  | 128  | 5      | 6         | 20000 | 0.9847        | 0.996400 | 1.400874         |
| 95  | 128  | 5      | 6         | 2000  | 0.9898        | 0.991311 | 1.400857         |
| 96  | 64   | 3      | 2         | 5000  | 0.9847        | 0.996309 | 1.400809         |
| 97  | 64   | 4      | 10        | 20000 | 0.9847        | 0.996309 | 1.400809         |
| 98  | 64   | 4      | 1         | 5000  | 0.9873        | 0.993720 | 1.400800         |
| 99  | 128  | 5      | 1         | 10000 | 0.9873        | 0.993707 | 1.400791         |
| 100 | 128  | 3      | 4         | 20000 | 0.9847        | 0.996199 | 1.400731         |
| 101 | 128  | 3      | 4         | 10000 | 0.9898        | 0.991123 | 1.400725         |
| 102 | 128  | 4      | 1         | 20000 | 0.9847        | 0.996096 | 1.400657         |
| 103 | 64   | 3      | 1         | 20000 | 0.9873        | 0.993506 | 1.400648         |
| 104 | 32   | 4      | 5         | 5000  | 0.9898        | 0.990961 | 1.400610         |



**Supplementary Table 4. Continued.**

| No. | node | layers | replicate | epoch | Test_Accuracy | Test_AUC | Euclidean length |
|-----|------|--------|-----------|-------|---------------|----------|------------------|
| 105 | 128  | 4      | 7         | 5000  | 0.9873        | 0.993435 | 1.400598         |
| 106 | 16   | 3      | 10        | 20000 | 0.9847        | 0.995999 | 1.400588         |
| 107 | 128  | 4      | 8         | 2000  | 0.9873        | 0.993338 | 1.400529         |
| 108 | 64   | 3      | 10        | 20000 | 0.9873        | 0.993325 | 1.400520         |
| 109 | 16   | 4      | 7         | 20000 | 0.9873        | 0.993228 | 1.400451         |
| 110 | 64   | 5      | 7         | 10000 | 0.9847        | 0.995804 | 1.400450         |
| 111 | 32   | 3      | 4         | 20000 | 0.9847        | 0.995772 | 1.400427         |
| 112 | 128  | 5      | 1         | 5000  | 0.9847        | 0.995753 | 1.400413         |
| 113 | 128  | 4      | 2         | 2000  | 0.9873        | 0.993143 | 1.400391         |
| 114 | 32   | 3      | 6         | 20000 | 0.9847        | 0.995681 | 1.400363         |
| 115 | 128  | 5      | 8         | 10000 | 0.9873        | 0.993085 | 1.400350         |
| 116 | 128  | 4      | 1         | 10000 | 0.9847        | 0.995643 | 1.400335         |
| 117 | 64   | 3      | 6         | 10000 | 0.9847        | 0.995643 | 1.400335         |
| 118 | 32   | 4      | 10        | 20000 | 0.9847        | 0.995610 | 1.400312         |
| 119 | 64   | 4      | 9         | 10000 | 0.9847        | 0.995604 | 1.400307         |
| 120 | 64   | 4      | 1         | 10000 | 0.9847        | 0.995584 | 1.400294         |
| 121 | 128  | 3      | 3         | 2000  | 0.9873        | 0.992982 | 1.400276         |
| 122 | 64   | 4      | 3         | 20000 | 0.9898        | 0.990463 | 1.400257         |
| 123 | 16   | 3      | 3         | 10000 | 0.9847        | 0.995461 | 1.400206         |
| 124 | 64   | 4      | 7         | 10000 | 0.9873        | 0.992800 | 1.400148         |
| 125 | 128  | 5      | 10        | 10000 | 0.9847        | 0.995377 | 1.400146         |
| 126 | 128  | 5      | 4         | 20000 | 0.9873        | 0.992742 | 1.400106         |
| 127 | 128  | 3      | 1         | 20000 | 0.9873        | 0.992684 | 1.400065         |
| 128 | 128  | 5      | 8         | 20000 | 0.9822        | 0.997727 | 1.400063         |
| 129 | 128  | 5      | 2         | 5000  | 0.9873        | 0.992671 | 1.400056         |
| 130 | 128  | 4      | 2         | 10000 | 0.9847        | 0.995248 | 1.400054         |
| 131 | 128  | 4      | 2         | 5000  | 0.9873        | 0.992625 | 1.400024         |
| 132 | 64   | 4      | 7         | 20000 | 0.9847        | 0.995176 | 1.400004         |
| 133 | 32   | 5      | 6         | 20000 | 0.9873        | 0.992509 | 1.399941         |
| 134 | 128  | 3      | 10        | 5000  | 0.9873        | 0.992483 | 1.399923         |
| 135 | 64   | 4      | 3         | 5000  | 0.9822        | 0.997488 | 1.399892         |
| 136 | 64   | 4      | 8         | 20000 | 0.9847        | 0.994995 | 1.399875         |
| 137 | 128  | 5      | 3         | 20000 | 0.9847        | 0.994956 | 1.399847         |
| 138 | 64   | 3      | 1         | 10000 | 0.9847        | 0.994911 | 1.399815         |
| 139 | 32   | 5      | 9         | 10000 | 0.9873        | 0.992328 | 1.399813         |
| 140 | 128  | 4      | 4         | 5000  | 0.9847        | 0.994814 | 1.399746         |
| 141 | 16   | 4      | 1         | 20000 | 0.9822        | 0.997229 | 1.399708         |
| 142 | 128  | 5      | 8         | 5000  | 0.9873        | 0.992062 | 1.399624         |
| 143 | 64   | 3      | 2         | 20000 | 0.9873        | 0.992049 | 1.399615         |
| 144 | 128  | 5      | 6         | 5000  | 0.9847        | 0.994613 | 1.399603         |
| 145 | 128  | 3      | 1         | 10000 | 0.9847        | 0.994587 | 1.399585         |
| 146 | 128  | 5      | 3         | 2000  | 0.9873        | 0.991978 | 1.399565         |
| 147 | 128  | 4      | 3         | 20000 | 0.9847        | 0.994548 | 1.399557         |
| 148 | 128  | 4      | 10        | 10000 | 0.9847        | 0.994516 | 1.399534         |
| 149 | 64   | 4      | 9         | 20000 | 0.9898        | 0.989401 | 1.399506         |
| 150 | 32   | 4      | 10        | 10000 | 0.9898        | 0.989336 | 1.399461         |
| 151 | 128  | 4      | 3         | 5000  | 0.9847        | 0.994283 | 1.399369         |
| 152 | 64   | 3      | 8         | 10000 | 0.9873        | 0.991680 | 1.399354         |
| 153 | 128  | 3      | 9         | 10000 | 0.9847        | 0.994030 | 1.399189         |
| 154 | 128  | 4      | 6         | 20000 | 0.9822        | 0.996497 | 1.399187         |
| 155 | 64   | 5      | 8         | 5000  | 0.9898        | 0.988941 | 1.399182         |
| 156 | 64   | 4      | 1         | 20000 | 0.9847        | 0.994004 | 1.399171         |

**Supplementary Table 4. Continued.**

| No. | node | layers | replicate | epoch | Test_Accuracy | Test_AUC | Euclidean length |
|-----|------|--------|-----------|-------|---------------|----------|------------------|
| 157 | 64   | 5      | 10        | 20000 | 0.9847        | 0.993875 | 1.399079         |
| 158 | 64   | 4      | 6         | 10000 | 0.9873        | 0.991214 | 1.399023         |
| 159 | 128  | 3      | 3         | 5000  | 0.9847        | 0.993746 | 1.398987         |
| 160 | 128  | 3      | 3         | 10000 | 0.9847        | 0.993661 | 1.398927         |
| 161 | 32   | 3      | 1         | 5000  | 0.9847        | 0.993655 | 1.398922         |
| 162 | 32   | 4      | 2         | 10000 | 0.9873        | 0.991052 | 1.398909         |
| 163 | 64   | 5      | 1         | 20000 | 0.9873        | 0.990929 | 1.398822         |
| 164 | 64   | 3      | 5         | 20000 | 0.9873        | 0.990923 | 1.398817         |
| 165 | 64   | 4      | 10        | 10000 | 0.9847        | 0.993499 | 1.398812         |
| 166 | 64   | 5      | 1         | 5000  | 0.9898        | 0.988352 | 1.398765         |
| 167 | 128  | 3      | 5         | 5000  | 0.9873        | 0.990845 | 1.398762         |
| 168 | 128  | 5      | 7         | 10000 | 0.9873        | 0.990780 | 1.398716         |
| 169 | 32   | 3      | 7         | 20000 | 0.9847        | 0.993364 | 1.398716         |
| 170 | 64   | 5      | 9         | 20000 | 0.9873        | 0.990754 | 1.398698         |
| 171 | 128  | 4      | 9         | 5000  | 0.9847        | 0.993318 | 1.398683         |
| 172 | 32   | 4      | 6         | 5000  | 0.9822        | 0.995766 | 1.398666         |
| 173 | 32   | 4      | 6         | 10000 | 0.9873        | 0.990709 | 1.398666         |
| 174 | 64   | 5      | 4         | 20000 | 0.9847        | 0.993286 | 1.398660         |
| 175 | 32   | 3      | 4         | 5000  | 0.9847        | 0.993240 | 1.398628         |
| 176 | 64   | 5      | 7         | 5000  | 0.9847        | 0.992969 | 1.398435         |
| 177 | 64   | 5      | 4         | 5000  | 0.9847        | 0.992904 | 1.398389         |
| 178 | 128  | 5      | 4         | 10000 | 0.9873        | 0.990256 | 1.398345         |
| 179 | 128  | 4      | 8         | 20000 | 0.9847        | 0.992826 | 1.398334         |
| 180 | 64   | 5      | 5         | 10000 | 0.9873        | 0.990146 | 1.398267         |
| 181 | 32   | 5      | 10        | 5000  | 0.9822        | 0.995202 | 1.398265         |
| 182 | 128  | 4      | 4         | 20000 | 0.9822        | 0.995112 | 1.398200         |
| 183 | 32   | 3      | 9         | 10000 | 0.9847        | 0.992515 | 1.398113         |
| 184 | 16   | 3      | 6         | 20000 | 0.9822        | 0.994956 | 1.398090         |
| 185 | 128  | 5      | 1         | 20000 | 0.9873        | 0.989848 | 1.398056         |
| 186 | 128  | 4      | 3         | 2000  | 0.9847        | 0.992418 | 1.398044         |
| 187 | 64   | 3      | 8         | 5000  | 0.9873        | 0.989751 | 1.397987         |
| 188 | 64   | 4      | 6         | 20000 | 0.9822        | 0.994717 | 1.397919         |
| 189 | 128  | 5      | 4         | 2000  | 0.9873        | 0.989615 | 1.397891         |
| 190 | 128  | 3      | 7         | 5000  | 0.9873        | 0.989531 | 1.397831         |
| 191 | 64   | 4      | 2         | 20000 | 0.9822        | 0.994587 | 1.397827         |
| 192 | 64   | 3      | 3         | 10000 | 0.9847        | 0.992043 | 1.397778         |
| 193 | 128  | 4      | 8         | 5000  | 0.9873        | 0.989408 | 1.397744         |
| 194 | 64   | 4      | 4         | 2000  | 0.9847        | 0.991913 | 1.397686         |
| 195 | 64   | 5      | 2         | 5000  | 0.9822        | 0.994386 | 1.397684         |
| 196 | 32   | 5      | 1         | 20000 | 0.9822        | 0.994361 | 1.397666         |
| 197 | 128  | 3      | 6         | 5000  | 0.9847        | 0.991881 | 1.397663         |
| 198 | 128  | 4      | 4         | 10000 | 0.9873        | 0.989220 | 1.397611         |
| 199 | 128  | 3      | 1         | 2000  | 0.9873        | 0.989174 | 1.397579         |
| 200 | 128  | 4      | 10        | 2000  | 0.9898        | 0.986623 | 1.397544         |
| 201 | 128  | 5      | 3         | 10000 | 0.9847        | 0.991674 | 1.397516         |
| 202 | 128  | 3      | 3         | 20000 | 0.9822        | 0.994134 | 1.397505         |
| 203 | 64   | 4      | 6         | 5000  | 0.9847        | 0.991583 | 1.397452         |
| 204 | 128  | 4      | 2         | 20000 | 0.9873        | 0.988941 | 1.397414         |
| 205 | 128  | 4      | 10        | 20000 | 0.9847        | 0.991441 | 1.397351         |
| 206 | 128  | 4      | 4         | 2000  | 0.9898        | 0.986339 | 1.397343         |
| 207 | 32   | 3      | 2         | 20000 | 0.9873        | 0.988663 | 1.397217         |
| 208 | 16   | 3      | 3         | 20000 | 0.9822        | 0.993629 | 1.397145         |

**Supplementary Table 4. Continued.**

| No. | node | layers | replicate | epoch | Test_Accuracy | Test_AUC | Euclidean length |
|-----|------|--------|-----------|-------|---------------|----------|------------------|
| 209 | 128  | 3      | 9         | 5000  | 0.9847        | 0.991143 | 1.397139         |
| 210 | 128  | 4      | 5         | 2000  | 0.9873        | 0.988488 | 1.397093         |
| 211 | 32   | 4      | 2         | 20000 | 0.9873        | 0.988320 | 1.396974         |
| 212 | 128  | 5      | 9         | 2000  | 0.9822        | 0.993376 | 1.396966         |
| 213 | 64   | 5      | 1         | 10000 | 0.9847        | 0.990845 | 1.396928         |
| 214 | 128  | 5      | 7         | 20000 | 0.9847        | 0.990793 | 1.396891         |
| 215 | 64   | 3      | 7         | 5000  | 0.9847        | 0.990793 | 1.396891         |
| 216 | 128  | 3      | 6         | 20000 | 0.9822        | 0.993266 | 1.396888         |
| 217 | 128  | 3      | 4         | 2000  | 0.9873        | 0.988151 | 1.396855         |
| 218 | 32   | 4      | 9         | 20000 | 0.9847        | 0.990735 | 1.396850         |
| 219 | 128  | 3      | 4         | 5000  | 0.9847        | 0.990702 | 1.396827         |
| 220 | 16   | 3      | 7         | 20000 | 0.9796        | 0.995681 | 1.396781         |
| 221 | 32   | 4      | 8         | 5000  | 0.9847        | 0.990288 | 1.396533         |
| 222 | 16   | 5      | 10        | 10000 | 0.9847        | 0.990243 | 1.396501         |
| 223 | 32   | 4      | 1         | 20000 | 0.9847        | 0.990204 | 1.396473         |
| 224 | 64   | 3      | 6         | 5000  | 0.9847        | 0.990197 | 1.396469         |
| 225 | 64   | 4      | 2         | 5000  | 0.9873        | 0.987582 | 1.396452         |
| 226 | 128  | 4      | 10        | 5000  | 0.9822        | 0.992625 | 1.396432         |
| 227 | 128  | 4      | 7         | 20000 | 0.9847        | 0.990068 | 1.396377         |
| 228 | 64   | 5      | 3         | 5000  | 0.9847        | 0.989861 | 1.396230         |
| 229 | 128  | 4      | 9         | 20000 | 0.9822        | 0.992334 | 1.396225         |
| 230 | 128  | 5      | 9         | 10000 | 0.9822        | 0.992308 | 1.396206         |
| 231 | 16   | 3      | 5         | 5000  | 0.9847        | 0.989764 | 1.396161         |
| 232 | 32   | 4      | 1         | 10000 | 0.9873        | 0.987128 | 1.396132         |
| 233 | 32   | 3      | 8         | 5000  | 0.9847        | 0.989718 | 1.396129         |
| 234 | 8    | 3      | 8         | 10000 | 0.9822        | 0.992062 | 1.396032         |
| 235 | 64   | 3      | 7         | 2000  | 0.9847        | 0.989356 | 1.395872         |
| 236 | 32   | 3      | 3         | 10000 | 0.9822        | 0.991693 | 1.395769         |
| 237 | 32   | 3      | 10        | 5000  | 0.9796        | 0.994179 | 1.395711         |
| 238 | 128  | 5      | 3         | 5000  | 0.9898        | 0.983988 | 1.395685         |
| 239 | 128  | 3      | 10        | 20000 | 0.9822        | 0.991570 | 1.395682         |
| 240 | 128  | 5      | 2         | 20000 | 0.9847        | 0.988961 | 1.395592         |
| 241 | 128  | 5      | 10        | 2000  | 0.9822        | 0.991415 | 1.395572         |
| 242 | 128  | 5      | 4         | 5000  | 0.9822        | 0.991298 | 1.395489         |
| 243 | 128  | 5      | 2         | 2000  | 0.9822        | 0.991240 | 1.395447         |
| 244 | 64   | 5      | 3         | 10000 | 0.9873        | 0.986099 | 1.395404         |
| 245 | 16   | 3      | 5         | 10000 | 0.9796        | 0.993681 | 1.395356         |
| 246 | 64   | 4      | 8         | 2000  | 0.9873        | 0.985995 | 1.395331         |
| 247 | 128  | 3      | 10        | 2000  | 0.9847        | 0.988449 | 1.395230         |
| 248 | 32   | 5      | 9         | 5000  | 0.9822        | 0.990897 | 1.395204         |
| 249 | 16   | 3      | 7         | 10000 | 0.9771        | 0.995817 | 1.395126         |
| 250 | 64   | 3      | 10        | 5000  | 0.9847        | 0.988255 | 1.395092         |
| 251 | 128  | 5      | 1         | 2000  | 0.9822        | 0.990502 | 1.394923         |
| 252 | 32   | 5      | 10        | 20000 | 0.9847        | 0.987990 | 1.394904         |
| 253 | 32   | 3      | 6         | 5000  | 0.9822        | 0.990437 | 1.394877         |
| 254 | 16   | 4      | 9         | 20000 | 0.9796        | 0.992930 | 1.394821         |
| 255 | 64   | 5      | 2         | 20000 | 0.9847        | 0.987724 | 1.394716         |
| 256 | 64   | 5      | 4         | 10000 | 0.9822        | 0.990204 | 1.394712         |
| 257 | 64   | 3      | 4         | 5000  | 0.9796        | 0.992554 | 1.394554         |
| 258 | 32   | 3      | 8         | 10000 | 0.9847        | 0.987148 | 1.394308         |
| 259 | 64   | 3      | 2         | 10000 | 0.9847        | 0.987109 | 1.394281         |
| 260 | 128  | 3      | 6         | 2000  | 0.9822        | 0.989543 | 1.394243         |

**Supplementary Table 4. Continued.**

| No. | node | layers | replicate | epoch | Test_Accuracy | Test_AUC | Euclidean length |
|-----|------|--------|-----------|-------|---------------|----------|------------------|
| 261 | 16   | 4      | 7         | 10000 | 0.9822        | 0.989524 | 1.394229         |
| 262 | 32   | 4      | 4         | 20000 | 0.9847        | 0.986811 | 1.394070         |
| 263 | 64   | 4      | 7         | 2000  | 0.9796        | 0.991835 | 1.394042         |
| 264 | 32   | 3      | 3         | 20000 | 0.9796        | 0.991810 | 1.394024         |
| 265 | 64   | 5      | 8         | 10000 | 0.9847        | 0.986436 | 1.393804         |
| 266 | 64   | 5      | 9         | 5000  | 0.9873        | 0.983833 | 1.393804         |
| 267 | 64   | 5      | 5         | 20000 | 0.9822        | 0.988870 | 1.393765         |
| 268 | 128  | 4      | 7         | 2000  | 0.9796        | 0.991227 | 1.393609         |
| 269 | 64   | 5      | 3         | 20000 | 0.9847        | 0.986157 | 1.393607         |
| 270 | 128  | 5      | 5         | 2000  | 0.9796        | 0.990968 | 1.393425         |
| 271 | 64   | 3      | 10        | 2000  | 0.9847        | 0.985814 | 1.393364         |
| 272 | 64   | 5      | 9         | 10000 | 0.9796        | 0.990638 | 1.393190         |
| 273 | 64   | 5      | 6         | 2000  | 0.9847        | 0.984739 | 1.392604         |
| 274 | 64   | 5      | 10        | 5000  | 0.9822        | 0.987174 | 1.392562         |
| 275 | 64   | 4      | 1         | 2000  | 0.9847        | 0.984545 | 1.392467         |
| 276 | 32   | 3      | 9         | 5000  | 0.9873        | 0.981716 | 1.392310         |
| 277 | 32   | 4      | 3         | 5000  | 0.9822        | 0.986805 | 1.392300         |
| 278 | 32   | 4      | 9         | 10000 | 0.9746        | 0.994270 | 1.392271         |
| 279 | 16   | 4      | 5         | 20000 | 0.9873        | 0.981398 | 1.392086         |
| 280 | 16   | 5      | 8         | 10000 | 0.9771        | 0.991428 | 1.391996         |
| 281 | 64   | 3      | 1         | 2000  | 0.9847        | 0.983652 | 1.391835         |
| 282 | 64   | 5      | 6         | 20000 | 0.9822        | 0.986067 | 1.391777         |
| 283 | 64   | 3      | 10        | 10000 | 0.9847        | 0.983354 | 1.391624         |
| 284 | 8    | 3      | 3         | 10000 | 0.9796        | 0.988339 | 1.391557         |
| 285 | 32   | 5      | 4         | 5000  | 0.9822        | 0.985652 | 1.391484         |
| 286 | 16   | 3      | 2         | 10000 | 0.9822        | 0.985484 | 1.391365         |
| 287 | 32   | 5      | 5         | 20000 | 0.9822        | 0.985387 | 1.391296         |
| 288 | 64   | 5      | 2         | 2000  | 0.9796        | 0.987964 | 1.391290         |
| 289 | 128  | 4      | 6         | 2000  | 0.9822        | 0.985303 | 1.391236         |
| 290 | 16   | 3      | 2         | 20000 | 0.9822        | 0.985057 | 1.391062         |
| 291 | 64   | 4      | 5         | 2000  | 0.9796        | 0.987303 | 1.390821         |
| 292 | 32   | 5      | 7         | 5000  | 0.9822        | 0.984649 | 1.390773         |
| 293 | 64   | 5      | 6         | 10000 | 0.9847        | 0.981683 | 1.390445         |
| 294 | 64   | 4      | 10        | 2000  | 0.9796        | 0.986662 | 1.390366         |
| 295 | 64   | 3      | 8         | 2000  | 0.9796        | 0.986539 | 1.390279         |
| 296 | 64   | 3      | 6         | 2000  | 0.9796        | 0.986332 | 1.390132         |
| 297 | 64   | 5      | 8         | 20000 | 0.9847        | 0.981217 | 1.390115         |
| 298 | 64   | 5      | 4         | 2000  | 0.972         | 0.993784 | 1.390105         |
| 299 | 8    | 3      | 6         | 20000 | 0.9898        | 0.975973 | 1.390046         |
| 300 | 8    | 3      | 2         | 20000 | 0.9771        | 0.988540 | 1.389941         |
| 301 | 32   | 4      | 10        | 5000  | 0.9898        | 0.975604 | 1.389786         |
| 302 | 16   | 3      | 10        | 5000  | 0.972         | 0.993117 | 1.389628         |
| 303 | 32   | 4      | 8         | 10000 | 0.9873        | 0.977565 | 1.389387         |
| 304 | 32   | 4      | 10        | 2000  | 0.9746        | 0.990172 | 1.389347         |
| 305 | 64   | 5      | 1         | 2000  | 0.9771        | 0.987608 | 1.389278         |
| 306 | 128  | 3      | 7         | 1000  | 0.9796        | 0.984377 | 1.388745         |
| 307 | 16   | 3      | 4         | 20000 | 0.9847        | 0.979165 | 1.388668         |
| 308 | 64   | 3      | 5         | 2000  | 0.9796        | 0.984144 | 1.388580         |
| 309 | 8    | 3      | 8         | 20000 | 0.9847        | 0.978582 | 1.388257         |
| 310 | 32   | 5      | 4         | 10000 | 0.9822        | 0.980952 | 1.388158         |
| 311 | 32   | 5      | 6         | 10000 | 0.9847        | 0.978291 | 1.388051         |
| 312 | 32   | 3      | 4         | 10000 | 0.9822        | 0.980563 | 1.387884         |

**Supplementary Table 4. Continued.**

| No. | node | layers | replicate | epoch | Test_Accuracy | Test_AUC | Euclidean length |
|-----|------|--------|-----------|-------|---------------|----------|------------------|
| 313 | 32   | 3      | 10        | 10000 | 0.9822        | 0.980414 | 1.387778         |
| 314 | 16   | 3      | 9         | 10000 | 0.9746        | 0.987912 | 1.387737         |
| 315 | 64   | 4      | 7         | 5000  | 0.9847        | 0.977721 | 1.387650         |
| 316 | 32   | 5      | 10        | 10000 | 0.9796        | 0.982771 | 1.387608         |
| 317 | 32   | 4      | 7         | 10000 | 0.9822        | 0.979877 | 1.387399         |
| 318 | 32   | 5      | 6         | 5000  | 0.9746        | 0.987290 | 1.387295         |
| 319 | 32   | 4      | 5         | 10000 | 0.9822        | 0.979605 | 1.387207         |
| 320 | 64   | 3      | 4         | 2000  | 0.9746        | 0.986941 | 1.387046         |
| 321 | 32   | 4      | 9         | 5000  | 0.9847        | 0.976678 | 1.386916         |
| 322 | 32   | 5      | 8         | 10000 | 0.9771        | 0.983852 | 1.386611         |
| 323 | 32   | 5      | 9         | 20000 | 0.9746        | 0.986274 | 1.386572         |
| 324 | 16   | 4      | 4         | 10000 | 0.972         | 0.988831 | 1.386568         |
| 325 | 16   | 3      | 8         | 20000 | 0.9822        | 0.978653 | 1.386535         |
| 326 | 64   | 5      | 6         | 5000  | 0.9796        | 0.981049 | 1.386388         |
| 327 | 64   | 4      | 9         | 2000  | 0.9695        | 0.990838 | 1.386251         |
| 328 | 32   | 5      | 1         | 10000 | 0.9771        | 0.983075 | 1.386060         |
| 329 | 32   | 5      | 7         | 10000 | 0.9796        | 0.980168 | 1.385765         |
| 330 | 16   | 3      | 6         | 10000 | 0.9746        | 0.984493 | 1.385306         |
| 331 | 64   | 5      | 10        | 10000 | 0.9847        | 0.974186 | 1.385161         |
| 332 | 32   | 5      | 2         | 5000  | 0.9822        | 0.976497 | 1.385014         |
| 333 | 32   | 3      | 5         | 10000 | 0.9771        | 0.981457 | 1.384912         |
| 334 | 16   | 4      | 8         | 5000  | 0.9796        | 0.978873 | 1.384850         |
| 335 | 32   | 5      | 4         | 20000 | 0.9847        | 0.973454 | 1.384647         |
| 336 | 64   | 3      | 3         | 2000  | 0.9771        | 0.980362 | 1.384137         |
| 337 | 8    | 3      | 10        | 10000 | 0.9847        | 0.972722 | 1.384133         |
| 338 | 64   | 4      | 6         | 2000  | 0.9771        | 0.980356 | 1.384132         |
| 339 | 32   | 4      | 7         | 5000  | 0.9822        | 0.975112 | 1.384037         |
| 340 | 16   | 4      | 9         | 5000  | 0.9822        | 0.975027 | 1.383978         |
| 341 | 64   | 5      | 5         | 2000  | 0.972         | 0.984966 | 1.383814         |
| 342 | 32   | 3      | 3         | 2000  | 0.972         | 0.984811 | 1.383704         |
| 343 | 32   | 4      | 7         | 20000 | 0.9847        | 0.970929 | 1.382873         |
| 344 | 16   | 4      | 3         | 10000 | 0.9796        | 0.976070 | 1.382870         |
| 345 | 64   | 5      | 8         | 2000  | 0.9695        | 0.985309 | 1.382304         |
| 346 | 32   | 5      | 2         | 20000 | 0.9822        | 0.972541 | 1.382228         |
| 347 | 128  | 4      | 5         | 1000  | 0.972         | 0.982577 | 1.382115         |
| 348 | 64   | 3      | 9         | 2000  | 0.9695        | 0.984856 | 1.381981         |
| 349 | 16   | 5      | 2         | 20000 | 0.9873        | 0.966345 | 1.381515         |
| 350 | 64   | 5      | 7         | 2000  | 0.9746        | 0.978932 | 1.381359         |
| 351 | 16   | 3      | 8         | 10000 | 0.9873        | 0.965911 | 1.381212         |
| 352 | 16   | 3      | 1         | 20000 | 0.9771        | 0.976167 | 1.381168         |
| 353 | 32   | 5      | 5         | 10000 | 0.9822        | 0.970903 | 1.381075         |
| 354 | 32   | 4      | 4         | 10000 | 0.9796        | 0.973486 | 1.381047         |
| 355 | 16   | 3      | 3         | 5000  | 0.9796        | 0.973182 | 1.380833         |
| 356 | 32   | 3      | 2         | 2000  | 0.9669        | 0.985743 | 1.380791         |
| 357 | 32   | 5      | 8         | 5000  | 0.9822        | 0.970314 | 1.380661         |
| 358 | 64   | 5      | 3         | 2000  | 0.9669        | 0.985212 | 1.380412         |
| 359 | 32   | 3      | 9         | 2000  | 0.9669        | 0.983949 | 1.379512         |
| 360 | 32   | 5      | 3         | 10000 | 0.9796        | 0.970916 | 1.379237         |
| 361 | 16   | 3      | 9         | 20000 | 0.9771        | 0.973053 | 1.378969         |
| 362 | 64   | 5      | 9         | 2000  | 0.9695        | 0.980330 | 1.378759         |
| 363 | 32   | 4      | 4         | 2000  | 0.9695        | 0.980142 | 1.378626         |
| 364 | 32   | 3      | 1         | 2000  | 0.9669        | 0.981638 | 1.377864         |

**Supplementary Table 4. Continued.**

| No. | node | layers | replicate | epoch | Test_Accuracy | Test_AUC | Euclidean length |
|-----|------|--------|-----------|-------|---------------|----------|------------------|
| 365 | 128  | 4      | 8         | 1000  | 0.9669        | 0.980188 | 1.376831         |
| 366 | 16   | 4      | 2         | 5000  | 0.9746        | 0.972250 | 1.376632         |
| 367 | 32   | 5      | 1         | 5000  | 0.9822        | 0.964474 | 1.376563         |
| 368 | 16   | 4      | 6         | 10000 | 0.9796        | 0.966746 | 1.376305         |
| 369 | 128  | 4      | 1         | 1000  | 0.9669        | 0.979417 | 1.376283         |
| 370 | 128  | 3      | 1         | 1000  | 0.9644        | 0.981483 | 1.376000         |
| 371 | 128  | 4      | 3         | 1000  | 0.9695        | 0.976070 | 1.375733         |
| 372 | 16   | 4      | 10        | 20000 | 0.9847        | 0.960621 | 1.375655         |
| 373 | 128  | 5      | 10        | 1000  | 0.9644        | 0.980330 | 1.375178         |
| 374 | 8    | 3      | 4         | 10000 | 0.9746        | 0.970165 | 1.375160         |
| 375 | 128  | 3      | 2         | 1000  | 0.9644        | 0.979844 | 1.374832         |
| 376 | 16   | 4      | 3         | 20000 | 0.9771        | 0.966662 | 1.374467         |
| 377 | 128  | 3      | 6         | 1000  | 0.9593        | 0.984234 | 1.374399         |
| 378 | 32   | 5      | 3         | 5000  | 0.972         | 0.971149 | 1.374014         |
| 379 | 8    | 3      | 1         | 20000 | 0.9796        | 0.963392 | 1.373951         |
| 380 | 32   | 3      | 8         | 2000  | 0.9618        | 0.981023 | 1.373850         |
| 381 | 16   | 4      | 2         | 20000 | 0.9669        | 0.975947 | 1.373815         |
| 382 | 128  | 4      | 9         | 1000  | 0.9567        | 0.985898 | 1.373780         |
| 383 | 32   | 5      | 3         | 20000 | 0.9847        | 0.957908 | 1.373762         |
| 384 | 16   | 4      | 10        | 10000 | 0.9847        | 0.957669 | 1.373595         |
| 385 | 32   | 4      | 3         | 20000 | 0.9796        | 0.962395 | 1.373252         |
| 386 | 32   | 4      | 3         | 10000 | 0.9796        | 0.961722 | 1.372780         |
| 387 | 128  | 5      | 9         | 1000  | 0.9644        | 0.976167 | 1.372213         |
| 388 | 128  | 5      | 7         | 1000  | 0.9669        | 0.973616 | 1.372160         |
| 389 | 128  | 3      | 8         | 1000  | 0.9593        | 0.980181 | 1.371500         |
| 390 | 128  | 4      | 4         | 1000  | 0.9618        | 0.977384 | 1.371255         |
| 391 | 128  | 4      | 10        | 1000  | 0.9644        | 0.974678 | 1.371154         |
| 392 | 64   | 4      | 4         | 1000  | 0.9618        | 0.976937 | 1.370936         |
| 393 | 16   | 4      | 2         | 10000 | 0.972         | 0.966662 | 1.370846         |
| 394 | 128  | 3      | 3         | 1000  | 0.9644        | 0.974069 | 1.370722         |
| 395 | 128  | 3      | 5         | 1000  | 0.9669        | 0.971427 | 1.370608         |
| 396 | 16   | 4      | 4         | 20000 | 0.972         | 0.966066 | 1.370426         |
| 397 | 32   | 5      | 7         | 20000 | 0.9822        | 0.955558 | 1.370331         |
| 398 | 16   | 4      | 3         | 5000  | 0.9746        | 0.962868 | 1.370022         |
| 399 | 128  | 3      | 4         | 1000  | 0.9644        | 0.973001 | 1.369963         |
| 400 | 128  | 3      | 10        | 1000  | 0.9618        | 0.975532 | 1.369935         |
| 401 | 16   | 3      | 8         | 5000  | 0.9822        | 0.954820 | 1.369817         |
| 402 | 64   | 4      | 3         | 2000  | 0.9644        | 0.972198 | 1.369393         |
| 403 | 16   | 3      | 6         | 5000  | 0.9873        | 0.948313 | 1.368963         |
| 404 | 128  | 5      | 5         | 1000  | 0.9567        | 0.978504 | 1.368483         |
| 405 | 16   | 3      | 1         | 5000  | 0.9796        | 0.954438 | 1.367687         |
| 406 | 32   | 3      | 7         | 5000  | 0.9746        | 0.959501 | 1.367658         |
| 407 | 64   | 4      | 6         | 1000  | 0.9593        | 0.974788 | 1.367650         |
| 408 | 32   | 4      | 1         | 5000  | 0.9746        | 0.959074 | 1.367358         |
| 409 | 16   | 4      | 8         | 20000 | 0.9746        | 0.958575 | 1.367008         |
| 410 | 128  | 4      | 6         | 1000  | 0.9542        | 0.978809 | 1.366954         |
| 411 | 32   | 4      | 8         | 2000  | 0.9618        | 0.971020 | 1.366725         |
| 412 | 128  | 5      | 1         | 1000  | 0.9644        | 0.968074 | 1.366468         |
| 413 | 32   | 4      | 5         | 20000 | 0.9847        | 0.945380 | 1.365056         |
| 414 | 32   | 4      | 6         | 2000  | 0.9542        | 0.975856 | 1.364842         |
| 415 | 16   | 3      | 4         | 5000  | 0.9695        | 0.959495 | 1.364024         |
| 416 | 16   | 4      | 7         | 5000  | 0.9669        | 0.960550 | 1.362920         |

**Supplementary Table 4. Continued.**

| No. | node | layers | replicate | epoch | Test_Accuracy | Test_AUC | Euclidean length |
|-----|------|--------|-----------|-------|---------------|----------|------------------|
| 417 | 32   | 4      | 6         | 20000 | 0.9822        | 0.944551 | 1.362679         |
| 418 | 64   | 3      | 3         | 1000  | 0.9618        | 0.965160 | 1.362569         |
| 419 | 16   | 3      | 2         | 5000  | 0.9669        | 0.959449 | 1.362145         |
| 420 | 128  | 5      | 6         | 1000  | 0.9618        | 0.964292 | 1.361954         |
| 421 | 128  | 4      | 2         | 1000  | 0.9542        | 0.971576 | 1.361785         |
| 422 | 32   | 4      | 3         | 2000  | 0.9618        | 0.963768 | 1.361583         |
| 423 | 64   | 4      | 8         | 1000  | 0.9491        | 0.976076 | 1.361439         |
| 424 | 128  | 5      | 8         | 1000  | 0.9542        | 0.971045 | 1.361406         |
| 425 | 128  | 4      | 7         | 1000  | 0.9491        | 0.975973 | 1.361365         |
| 426 | 128  | 5      | 2         | 1000  | 0.9593        | 0.965898 | 1.361329         |
| 427 | 64   | 5      | 10        | 2000  | 0.9567        | 0.968171 | 1.361113         |
| 428 | 32   | 4      | 5         | 2000  | 0.9491        | 0.975325 | 1.360900         |
| 429 | 32   | 4      | 1         | 2000  | 0.9517        | 0.972599 | 1.360765         |
| 430 | 64   | 3      | 7         | 1000  | 0.9491        | 0.974192 | 1.360089         |
| 431 | 64   | 4      | 7         | 1000  | 0.9618        | 0.961605 | 1.360053         |
| 432 | 32   | 3      | 5         | 2000  | 0.9567        | 0.965801 | 1.359429         |
| 433 | 16   | 3      | 7         | 5000  | 0.9618        | 0.960647 | 1.359376         |
| 434 | 8    | 3      | 6         | 10000 | 0.9847        | 0.936439 | 1.358879         |
| 435 | 32   | 5      | 2         | 10000 | 0.9822        | 0.938886 | 1.358758         |
| 436 | 8    | 3      | 9         | 10000 | 0.972         | 0.949343 | 1.358689         |
| 437 | 8    | 5      | 9         | 20000 | 0.9644        | 0.956983 | 1.358633         |
| 438 | 8    | 3      | 3         | 20000 | 0.972         | 0.949207 | 1.358594         |
| 439 | 64   | 3      | 1         | 1000  | 0.9491        | 0.971958 | 1.358490         |
| 440 | 128  | 3      | 9         | 1000  | 0.9593        | 0.960052 | 1.357187         |
| 441 | 32   | 3      | 5         | 1000  | 0.9618        | 0.956970 | 1.356779         |
| 442 | 32   | 3      | 10        | 1000  | 0.9542        | 0.964448 | 1.356708         |
| 443 | 128  | 3      | 3         | 500   | 0.9466        | 0.971149 | 1.356164         |
| 444 | 16   | 5      | 3         | 10000 | 0.9618        | 0.955578 | 1.355798         |
| 445 | 32   | 3      | 9         | 1000  | 0.9618        | 0.955513 | 1.355752         |
| 446 | 32   | 5      | 8         | 20000 | 0.9822        | 0.934295 | 1.355590         |
| 447 | 128  | 5      | 3         | 1000  | 0.9644        | 0.951563 | 1.354821         |
| 448 | 8    | 3      | 4         | 20000 | 0.972         | 0.940116 | 1.352258         |
| 449 | 64   | 4      | 3         | 1000  | 0.9593        | 0.951809 | 1.351369         |
| 450 | 16   | 5      | 7         | 20000 | 0.9618        | 0.948313 | 1.350688         |
| 451 | 64   | 4      | 1         | 1000  | 0.9542        | 0.953771 | 1.349139         |
| 452 | 16   | 4      | 9         | 10000 | 0.9771        | 0.930165 | 1.349048         |
| 453 | 16   | 5      | 2         | 10000 | 0.9415        | 0.965749 | 1.348738         |
| 454 | 64   | 4      | 9         | 1000  | 0.9542        | 0.952975 | 1.348576         |
| 455 | 64   | 4      | 2         | 1000  | 0.9542        | 0.952515 | 1.348252         |
| 456 | 64   | 3      | 5         | 1000  | 0.9593        | 0.947361 | 1.348240         |
| 457 | 16   | 3      | 4         | 10000 | 0.9822        | 0.923133 | 1.347921         |
| 458 | 32   | 3      | 6         | 2000  | 0.9746        | 0.930870 | 1.347726         |
| 459 | 64   | 4      | 5         | 1000  | 0.9644        | 0.941424 | 1.347719         |
| 460 | 128  | 5      | 4         | 1000  | 0.9567        | 0.948151 | 1.346947         |
| 461 | 8    | 3      | 2         | 10000 | 0.9771        | 0.925878 | 1.346096         |
| 462 | 64   | 3      | 6         | 1000  | 0.9517        | 0.951699 | 1.345907         |
| 463 | 32   | 3      | 10        | 2000  | 0.944         | 0.958770 | 1.345502         |
| 464 | 32   | 5      | 9         | 2000  | 0.9567        | 0.945522 | 1.345098         |
| 465 | 32   | 5      | 1         | 2000  | 0.9644        | 0.937300 | 1.344841         |
| 466 | 16   | 4      | 5         | 2000  | 0.9567        | 0.944694 | 1.344515         |
| 467 | 16   | 5      | 6         | 20000 | 0.9669        | 0.932865 | 1.343552         |
| 468 | 64   | 3      | 8         | 1000  | 0.9389        | 0.959488 | 1.342442         |

**Supplementary Table 4. Continued.**

| No. | node | layers | replicate | epoch | Test_Accuracy | Test_AUC | Euclidean length |
|-----|------|--------|-----------|-------|---------------|----------|------------------|
| 469 | 32   | 3      | 4         | 2000  | 0.944         | 0.953370 | 1.341659         |
| 470 | 32   | 3      | 7         | 2000  | 0.9669        | 0.929873 | 1.341477         |
| 471 | 64   | 5      | 7         | 1000  | 0.9364        | 0.958737 | 1.340157         |
| 472 | 64   | 5      | 2         | 1000  | 0.9389        | 0.953907 | 1.338459         |
| 473 | 8    | 3      | 1         | 10000 | 0.9593        | 0.933266 | 1.338373         |
| 474 | 32   | 4      | 7         | 2000  | 0.9491        | 0.943282 | 1.338123         |
| 475 | 32   | 4      | 9         | 1000  | 0.944         | 0.944700 | 1.335513         |
| 476 | 16   | 3      | 1         | 2000  | 0.9262        | 0.961651 | 1.335147         |
| 477 | 64   | 3      | 10        | 1000  | 0.9338        | 0.953816 | 1.334821         |
| 478 | 128  | 3      | 2         | 500   | 0.9237        | 0.963457 | 1.334718         |
| 479 | 64   | 3      | 9         | 1000  | 0.9338        | 0.952554 | 1.333920         |
| 480 | 64   | 3      | 2         | 1000  | 0.9186        | 0.965620 | 1.332759         |
| 481 | 16   | 4      | 1         | 10000 | 0.9593        | 0.924020 | 1.331942         |
| 482 | 32   | 5      | 7         | 2000  | 0.9542        | 0.928714 | 1.331543         |
| 483 | 128  | 4      | 3         | 500   | 0.9364        | 0.944422 | 1.329954         |
| 484 | 128  | 3      | 7         | 500   | 0.9211        | 0.957760 | 1.328807         |
| 485 | 16   | 3      | 10        | 2000  | 0.9567        | 0.921994 | 1.328664         |
| 486 | 32   | 3      | 3         | 1000  | 0.9186        | 0.959754 | 1.328515         |
| 487 | 128  | 5      | 2         | 500   | 0.9288        | 0.949064 | 1.327928         |
| 488 | 128  | 4      | 2         | 500   | 0.9186        | 0.958834 | 1.327851         |
| 489 | 8    | 3      | 8         | 5000  | 0.9593        | 0.916581 | 1.326792         |
| 490 | 128  | 3      | 10        | 500   | 0.9237        | 0.952191 | 1.326608         |
| 491 | 128  | 3      | 1         | 500   | 0.9211        | 0.953927 | 1.326047         |
| 492 | 128  | 3      | 9         | 500   | 0.9364        | 0.938485 | 1.325744         |
| 493 | 128  | 3      | 4         | 500   | 0.916         | 0.958154 | 1.325563         |
| 494 | 32   | 4      | 9         | 2000  | 0.944         | 0.926973 | 1.323032         |
| 495 | 128  | 3      | 6         | 500   | 0.9059        | 0.959967 | 1.319921         |
| 496 | 8    | 3      | 5         | 5000  | 0.9491        | 0.915409 | 1.318622         |
| 497 | 128  | 4      | 4         | 500   | 0.9059        | 0.956277 | 1.317240         |
| 498 | 16   | 5      | 5         | 10000 | 0.9822        | 0.876490 | 1.316416         |
| 499 | 128  | 5      | 1         | 500   | 0.944         | 0.916445 | 1.315677         |
| 500 | 64   | 3      | 4         | 1000  | 0.9364        | 0.923690 | 1.315313         |
| 501 | 128  | 4      | 8         | 500   | 0.9084        | 0.950022 | 1.314433         |
| 502 | 16   | 3      | 9         | 5000  | 0.9695        | 0.885988 | 1.313357         |
| 503 | 16   | 4      | 5         | 5000  | 0.972         | 0.879753 | 1.311011         |
| 504 | 128  | 5      | 10        | 500   | 0.9313        | 0.920576 | 1.309496         |
| 505 | 128  | 4      | 5         | 500   | 0.883         | 0.966830 | 1.309370         |
| 506 | 32   | 4      | 2         | 2000  | 0.9389        | 0.912334 | 1.309155         |
| 507 | 128  | 4      | 9         | 500   | 0.8982        | 0.951958 | 1.308812         |
| 508 | 32   | 5      | 10        | 2000  | 0.9364        | 0.914192 | 1.308660         |
| 509 | 128  | 4      | 1         | 500   | 0.9109        | 0.939236 | 1.308397         |
| 510 | 32   | 5      | 4         | 2000  | 0.9491        | 0.899818 | 1.307847         |
| 511 | 8    | 3      | 2         | 5000  | 0.9517        | 0.894004 | 1.305747         |
| 512 | 128  | 4      | 6         | 500   | 0.8931        | 0.950255 | 1.304076         |
| 513 | 128  | 5      | 4         | 500   | 0.9033        | 0.940142 | 1.303771         |
| 514 | 16   | 4      | 10        | 2000  | 0.9618        | 0.880051 | 1.303668         |
| 515 | 128  | 4      | 10        | 500   | 0.9059        | 0.936231 | 1.302760         |
| 516 | 64   | 5      | 8         | 1000  | 0.9237        | 0.917947 | 1.302247         |
| 517 | 64   | 5      | 9         | 1000  | 0.9364        | 0.902732 | 1.300680         |
| 518 | 128  | 5      | 6         | 500   | 0.9186        | 0.920751 | 1.300618         |
| 519 | 8    | 3      | 3         | 5000  | 0.9593        | 0.878037 | 1.300464         |
| 520 | 64   | 3      | 9         | 500   | 0.883         | 0.953305 | 1.299415         |



**Supplementary Table 4. Continued.**

| No. | node | layers | replicate | epoch | Test_Accuracy | Test_AUC | Euclidean length |
|-----|------|--------|-----------|-------|---------------|----------|------------------|
| 521 | 8    | 3      | 3         | 2000  | 0.916         | 0.920025 | 1.298269         |
| 522 | 32   | 5      | 8         | 2000  | 0.9313        | 0.903606 | 1.297622         |
| 523 | 32   | 3      | 7         | 1000  | 0.9135        | 0.921158 | 1.297311         |
| 524 | 128  | 5      | 3         | 500   | 0.9084        | 0.925878 | 1.297090         |
| 525 | 128  | 3      | 5         | 500   | 0.916         | 0.917895 | 1.296760         |
| 526 | 64   | 3      | 4         | 500   | 0.8779        | 0.954043 | 1.296498         |
| 527 | 64   | 5      | 5         | 1000  | 0.9262        | 0.901942 | 1.292805         |
| 528 | 128  | 3      | 8         | 500   | 0.9033        | 0.922065 | 1.290796         |
| 529 | 16   | 4      | 3         | 2000  | 0.9491        | 0.874450 | 1.290525         |
| 530 | 8    | 3      | 7         | 10000 | 0.972         | 0.846396 | 1.288864         |
| 531 | 8    | 4      | 1         | 10000 | 0.9593        | 0.860491 | 1.288682         |
| 532 | 64   | 5      | 6         | 1000  | 0.9211        | 0.899274 | 1.287291         |
| 533 | 16   | 5      | 4         | 10000 | 0.9644        | 0.852139 | 1.286937         |
| 534 | 128  | 4      | 7         | 500   | 0.9211        | 0.897837 | 1.286288         |
| 535 | 128  | 5      | 9         | 500   | 0.9135        | 0.904363 | 1.285440         |
| 536 | 32   | 5      | 6         | 2000  | 0.9237        | 0.893143 | 1.284884         |
| 537 | 64   | 5      | 10        | 1000  | 0.9542        | 0.860265 | 1.284738         |
| 538 | 16   | 4      | 6         | 5000  | 0.9567        | 0.856574 | 1.284132         |
| 539 | 32   | 3      | 4         | 1000  | 0.8779        | 0.935260 | 1.282739         |
| 540 | 64   | 4      | 10        | 1000  | 0.9491        | 0.862440 | 1.282417         |
| 541 | 128  | 5      | 5         | 500   | 0.9008        | 0.912398 | 1.282151         |
| 542 | 64   | 4      | 4         | 500   | 0.9084        | 0.904370 | 1.281825         |
| 543 | 128  | 5      | 7         | 500   | 0.9211        | 0.890611 | 1.281255         |
| 544 | 64   | 4      | 6         | 500   | 0.8804        | 0.929770 | 1.280459         |
| 545 | 64   | 3      | 5         | 500   | 0.8906        | 0.916795 | 1.278155         |
| 546 | 32   | 4      | 8         | 1000  | 0.9313        | 0.871466 | 1.275450         |
| 547 | 64   | 5      | 4         | 1000  | 0.9008        | 0.902732 | 1.275290         |
| 548 | 64   | 5      | 1         | 1000  | 0.9084        | 0.894904 | 1.275164         |
| 549 | 8    | 4      | 8         | 20000 | 0.9822        | 0.812890 | 1.274954         |
| 550 | 8    | 3      | 10        | 5000  | 0.944         | 0.856354 | 1.274550         |
| 551 | 16   | 4      | 6         | 2000  | 0.9644        | 0.830844 | 1.272937         |
| 552 | 64   | 3      | 8         | 500   | 0.8906        | 0.908306 | 1.272080         |
| 553 | 64   | 3      | 7         | 500   | 0.8575        | 0.935707 | 1.269194         |
| 554 | 64   | 4      | 9         | 500   | 0.916         | 0.876069 | 1.267499         |
| 555 | 64   | 3      | 6         | 500   | 0.8804        | 0.910806 | 1.266756         |
| 556 | 128  | 5      | 8         | 500   | 0.9135        | 0.875985 | 1.265635         |
| 557 | 32   | 5      | 3         | 2000  | 0.9237        | 0.864123 | 1.264884         |
| 558 | 16   | 3      | 5         | 2000  | 0.9135        | 0.874094 | 1.264327         |
| 559 | 32   | 4      | 7         | 1000  | 0.916         | 0.865574 | 1.260267         |
| 560 | 32   | 5      | 2         | 2000  | 0.9262        | 0.852987 | 1.259140         |
| 561 | 64   | 4      | 5         | 500   | 0.9389        | 0.832929 | 1.255111         |
| 562 | 32   | 4      | 4         | 1000  | 0.9186        | 0.854444 | 1.254552         |
| 563 | 64   | 4      | 10        | 500   | 0.9135        | 0.858283 | 1.253448         |
| 564 | 64   | 4      | 7         | 500   | 0.9135        | 0.857500 | 1.252912         |
| 565 | 64   | 5      | 3         | 1000  | 0.9237        | 0.844855 | 1.251799         |
| 566 | 32   | 5      | 5         | 1000  | 0.8728        | 0.896613 | 1.251277         |
| 567 | 8    | 4      | 6         | 10000 | 0.9186        | 0.846357 | 1.249058         |
| 568 | 64   | 3      | 2         | 500   | 0.8753        | 0.888047 | 1.246907         |
| 569 | 64   | 4      | 2         | 500   | 0.9135        | 0.846674 | 1.245528         |
| 570 | 8    | 3      | 7         | 20000 | 0.9466        | 0.805127 | 1.242691         |
| 571 | 16   | 5      | 4         | 2000  | 0.9135        | 0.841028 | 1.241697         |
| 572 | 16   | 5      | 10        | 20000 | 0.8651        | 0.889679 | 1.240938         |

**Supplementary Table 4. Continued.**

| No. | node | layers | replicate | epoch | Test_Accuracy | Test_AUC | Euclidean length |
|-----|------|--------|-----------|-------|---------------|----------|------------------|
| 573 | 64   | 4      | 8         | 500   | 0.9135        | 0.838070 | 1.239695         |
| 574 | 64   | 3      | 1         | 500   | 0.9237        | 0.826493 | 1.239481         |
| 575 | 32   | 3      | 1         | 1000  | 0.8804        | 0.872016 | 1.239159         |
| 576 | 16   | 4      | 9         | 2000  | 0.9059        | 0.843819 | 1.238017         |
| 577 | 64   | 3      | 3         | 500   | 0.8753        | 0.875422 | 1.237947         |
| 578 | 16   | 3      | 2         | 2000  | 0.9135        | 0.834709 | 1.237425         |
| 579 | 64   | 3      | 10        | 500   | 0.8651        | 0.884512 | 1.237239         |
| 580 | 16   | 4      | 6         | 20000 | 0.9237        | 0.819313 | 1.234704         |
| 581 | 16   | 4      | 4         | 2000  | 0.944         | 0.793906 | 1.233460         |
| 582 | 16   | 5      | 8         | 20000 | 0.9644        | 0.767218 | 1.232352         |
| 583 | 64   | 4      | 1         | 500   | 0.8906        | 0.851433 | 1.232115         |
| 584 | 32   | 4      | 7         | 500   | 0.8524        | 0.888766 | 1.231459         |
| 585 | 8    | 4      | 7         | 5000  | 0.8906        | 0.846733 | 1.228871         |
| 586 | 16   | 3      | 7         | 2000  | 0.9135        | 0.821857 | 1.228793         |
| 587 | 16   | 3      | 3         | 2000  | 0.8906        | 0.846610 | 1.228786         |
| 588 | 8    | 4      | 4         | 2000  | 0.9033        | 0.830734 | 1.227220         |
| 589 | 16   | 5      | 6         | 10000 | 0.9618        | 0.762057 | 1.227107         |
| 590 | 32   | 4      | 3         | 1000  | 0.9364        | 0.791601 | 1.226164         |
| 591 | 32   | 3      | 6         | 1000  | 0.8601        | 0.872113 | 1.224889         |
| 592 | 16   | 3      | 4         | 2000  | 0.916         | 0.812171 | 1.224205         |
| 593 | 64   | 4      | 3         | 500   | 0.9033        | 0.824784 | 1.223200         |
| 594 | 32   | 5      | 8         | 1000  | 0.8957        | 0.831420 | 1.222104         |
| 595 | 64   | 5      | 9         | 500   | 0.888         | 0.839183 | 1.221791         |
| 596 | 8    | 3      | 5         | 10000 | 0.8906        | 0.834003 | 1.220135         |
| 597 | 16   | 5      | 8         | 2000  | 0.9237        | 0.796159 | 1.219464         |
| 598 | 64   | 5      | 4         | 500   | 0.8575        | 0.863133 | 1.216678         |
| 599 | 32   | 3      | 6         | 500   | 0.888         | 0.826376 | 1.213030         |
| 600 | 8    | 3      | 1         | 5000  | 0.944         | 0.759979 | 1.211901         |
| 601 | 16   | 3      | 6         | 2000  | 0.9567        | 0.743294 | 1.211512         |
| 602 | 32   | 4      | 1         | 1000  | 0.9186        | 0.789503 | 1.211256         |
| 603 | 16   | 5      | 2         | 5000  | 0.9288        | 0.770112 | 1.206541         |
| 604 | 32   | 4      | 10        | 500   | 0.8499        | 0.856134 | 1.206356         |
| 605 | 16   | 3      | 4         | 1000  | 0.8728        | 0.831219 | 1.205282         |
| 606 | 8    | 4      | 1         | 5000  | 0.8244        | 0.878763 | 1.204931         |
| 607 | 16   | 3      | 3         | 1000  | 0.9033        | 0.795518 | 1.203661         |
| 608 | 32   | 5      | 5         | 2000  | 0.8982        | 0.801255 | 1.203650         |
| 609 | 32   | 3      | 2         | 1000  | 0.8753        | 0.825619 | 1.203244         |
| 610 | 32   | 5      | 2         | 1000  | 0.8931        | 0.800115 | 1.199088         |
| 611 | 8    | 5      | 9         | 5000  | 0.8295        | 0.865800 | 1.199033         |
| 612 | 16   | 5      | 7         | 5000  | 0.9237        | 0.762549 | 1.197791         |
| 613 | 128  | 3      | 10        | 100   | 0.7913        | 0.896011 | 1.195404         |
| 614 | 16   | 3      | 8         | 2000  | 0.8422        | 0.847568 | 1.194852         |
| 615 | 16   | 5      | 3         | 2000  | 0.9059        | 0.779073 | 1.194826         |
| 616 | 16   | 5      | 1         | 20000 | 0.9033        | 0.781060 | 1.194155         |
| 617 | 8    | 4      | 6         | 20000 | 0.8321        | 0.853991 | 1.192347         |
| 618 | 16   | 5      | 9         | 5000  | 0.9415        | 0.726453 | 1.189183         |
| 619 | 64   | 5      | 1         | 500   | 0.8422        | 0.839436 | 1.189098         |
| 620 | 16   | 5      | 4         | 20000 | 0.8295        | 0.851368 | 1.188654         |
| 621 | 32   | 5      | 6         | 1000  | 0.9084        | 0.759985 | 1.184385         |
| 622 | 8    | 4      | 10        | 20000 | 0.8295        | 0.844738 | 1.183914         |
| 623 | 16   | 3      | 2         | 1000  | 0.799         | 0.870294 | 1.181445         |
| 624 | 32   | 4      | 3         | 500   | 0.8372        | 0.826040 | 1.176115         |

**Supplementary Table 4. Continued.**

| No. | node | layers | replicate | epoch | Test_Accuracy | Test_AUC | Euclidean length |
|-----|------|--------|-----------|-------|---------------|----------|------------------|
| 625 | 8    | 4      | 3         | 10000 | 0.8321        | 0.826525 | 1.172832         |
| 626 | 64   | 5      | 6         | 500   | 0.8779        | 0.777499 | 1.172695         |
| 627 | 32   | 3      | 3         | 500   | 0.799         | 0.857183 | 1.171820         |
| 628 | 32   | 5      | 10        | 500   | 0.8651        | 0.788383 | 1.170447         |
| 629 | 128  | 3      | 4         | 100   | 0.7608        | 0.887568 | 1.169014         |
| 630 | 16   | 4      | 1         | 2000  | 0.8906        | 0.749963 | 1.164308         |
| 631 | 32   | 5      | 8         | 500   | 0.8015        | 0.838685 | 1.160084         |
| 632 | 32   | 4      | 10        | 1000  | 0.8906        | 0.743274 | 1.160011         |
| 633 | 16   | 3      | 6         | 1000  | 0.8397        | 0.798710 | 1.158894         |
| 634 | 64   | 5      | 2         | 500   | 0.8422        | 0.795376 | 1.158414         |
| 635 | 8    | 3      | 4         | 500   | 0.715         | 0.910372 | 1.157584         |
| 636 | 8    | 4      | 9         | 10000 | 0.8321        | 0.802563 | 1.156070         |
| 637 | 8    | 5      | 6         | 10000 | 0.8295        | 0.804550 | 1.155583         |
| 638 | 32   | 3      | 9         | 500   | 0.827         | 0.805858 | 1.154702         |
| 639 | 128  | 3      | 9         | 100   | 0.7761        | 0.854029 | 1.153992         |
| 640 | 8    | 5      | 1         | 20000 | 0.8321        | 0.798969 | 1.153578         |
| 641 | 32   | 3      | 8         | 1000  | 0.8626        | 0.765709 | 1.153425         |
| 642 | 8    | 4      | 9         | 5000  | 0.827         | 0.802971 | 1.152688         |
| 643 | 32   | 5      | 5         | 500   | 0.7888        | 0.839895 | 1.152228         |
| 644 | 16   | 5      | 2         | 2000  | 0.9186        | 0.695395 | 1.152128         |
| 645 | 8    | 3      | 8         | 2000  | 0.916         | 0.697097 | 1.151087         |
| 646 | 32   | 4      | 6         | 1000  | 0.883         | 0.735835 | 1.149410         |
| 647 | 16   | 4      | 10        | 1000  | 0.827         | 0.796017 | 1.147855         |
| 648 | 128  | 3      | 1         | 100   | 0.8092        | 0.813421 | 1.147370         |
| 649 | 16   | 5      | 5         | 2000  | 0.855         | 0.762621 | 1.145694         |
| 650 | 8    | 3      | 9         | 20000 | 0.8321        | 0.785036 | 1.143972         |
| 651 | 16   | 5      | 5         | 20000 | 0.8295        | 0.782724 | 1.140495         |
| 652 | 64   | 5      | 7         | 500   | 0.7939        | 0.818225 | 1.140074         |
| 653 | 16   | 4      | 8         | 2000  | 0.9466        | 0.632526 | 1.138482         |
| 654 | 8    | 4      | 2         | 2000  | 0.8372        | 0.770578 | 1.137846         |
| 655 | 16   | 4      | 3         | 1000  | 0.8601        | 0.744129 | 1.137321         |
| 656 | 16   | 5      | 6         | 5000  | 0.8321        | 0.774871 | 1.137020         |
| 657 | 64   | 5      | 3         | 500   | 0.8168        | 0.790766 | 1.136870         |
| 658 | 16   | 5      | 9         | 10000 | 0.8346        | 0.771743 | 1.136726         |
| 659 | 16   | 5      | 1         | 2000  | 0.8499        | 0.752766 | 1.135336         |
| 660 | 16   | 5      | 1         | 5000  | 0.8295        | 0.772352 | 1.133401         |
| 661 | 8    | 3      | 5         | 500   | 0.7684        | 0.833129 | 1.133377         |
| 662 | 16   | 5      | 5         | 5000  | 0.8295        | 0.771989 | 1.133154         |
| 663 | 8    | 4      | 5         | 2000  | 0.8142        | 0.787788 | 1.132930         |
| 664 | 8    | 5      | 5         | 20000 | 0.8321        | 0.767943 | 1.132310         |
| 665 | 16   | 4      | 9         | 1000  | 0.7761        | 0.823178 | 1.131350         |
| 666 | 128  | 3      | 8         | 100   | 0.7481        | 0.847723 | 1.130614         |
| 667 | 64   | 4      | 5         | 100   | 0.7226        | 0.868656 | 1.129917         |
| 668 | 16   | 4      | 10        | 5000  | 0.8473        | 0.746732 | 1.129392         |
| 669 | 8    | 5      | 10        | 5000  | 0.8066        | 0.790073 | 1.129079         |
| 670 | 8    | 3      | 7         | 1000  | 0.5751        | 0.971136 | 1.128648         |
| 671 | 8    | 4      | 4         | 20000 | 0.8321        | 0.761973 | 1.128270         |
| 672 | 64   | 4      | 3         | 100   | 0.7455        | 0.845250 | 1.127039         |
| 673 | 32   | 4      | 8         | 500   | 0.7913        | 0.799209 | 1.124673         |
| 674 | 8    | 3      | 10        | 20000 | 0.8295        | 0.759163 | 1.124455         |
| 675 | 64   | 5      | 10        | 500   | 0.7964        | 0.793466 | 1.124207         |
| 676 | 8    | 5      | 3         | 20000 | 0.8295        | 0.758354 | 1.123909         |

**Supplementary Table 4. Continued.**

| No. | node | layers | replicate | epoch | Test_Accuracy | Test_AUC | Euclidean length |
|-----|------|--------|-----------|-------|---------------|----------|------------------|
| 677 | 128  | 5      | 6         | 100   | 0.7913        | 0.798017 | 1.123827         |
| 678 | 8    | 4      | 5         | 10000 | 0.827         | 0.760329 | 1.123400         |
| 679 | 128  | 4      | 8         | 100   | 0.7634        | 0.823935 | 1.123232         |
| 680 | 8    | 5      | 1         | 5000  | 0.8142        | 0.773634 | 1.123135         |
| 681 | 16   | 5      | 9         | 20000 | 0.8321        | 0.753543 | 1.122594         |
| 682 | 8    | 3      | 4         | 1000  | 0.7201        | 0.860996 | 1.122434         |
| 683 | 16   | 4      | 8         | 1000  | 0.855         | 0.726026 | 1.121668         |
| 684 | 64   | 3      | 3         | 100   | 0.6997        | 0.876335 | 1.121402         |
| 685 | 8    | 4      | 5         | 20000 | 0.8321        | 0.750986 | 1.120879         |
| 686 | 16   | 5      | 1         | 10000 | 0.8448        | 0.734650 | 1.119553         |
| 687 | 8    | 4      | 3         | 5000  | 0.8321        | 0.748415 | 1.119159         |
| 688 | 64   | 5      | 8         | 500   | 0.8219        | 0.758898 | 1.118680         |
| 689 | 128  | 3      | 6         | 100   | 0.7583        | 0.821948 | 1.118310         |
| 690 | 8    | 4      | 7         | 2000  | 0.7939        | 0.786991 | 1.117870         |
| 691 | 128  | 5      | 4         | 100   | 0.7023        | 0.869258 | 1.117513         |
| 692 | 32   | 3      | 7         | 500   | 0.8397        | 0.737221 | 1.117403         |
| 693 | 16   | 4      | 2         | 2000  | 0.8753        | 0.692487 | 1.116104         |
| 694 | 8    | 4      | 7         | 20000 | 0.8321        | 0.740341 | 1.113776         |
| 695 | 32   | 4      | 5         | 1000  | 0.8295        | 0.742517 | 1.113284         |
| 696 | 8    | 4      | 4         | 10000 | 0.8295        | 0.740031 | 1.111627         |
| 697 | 128  | 4      | 3         | 100   | 0.7608        | 0.808979 | 1.110524         |
| 698 | 8    | 3      | 8         | 1000  | 0.8422        | 0.723728 | 1.110442         |
| 699 | 64   | 4      | 9         | 100   | 0.7125        | 0.850844 | 1.109771         |
| 700 | 8    | 4      | 2         | 20000 | 0.8321        | 0.733174 | 1.109024         |
| 701 | 8    | 5      | 7         | 20000 | 0.8321        | 0.732015 | 1.108258         |
| 702 | 128  | 4      | 9         | 100   | 0.7888        | 0.777946 | 1.107883         |
| 703 | 16   | 4      | 5         | 10000 | 0.9109        | 0.630143 | 1.107619         |
| 704 | 8    | 5      | 8         | 20000 | 0.8321        | 0.730746 | 1.107421         |
| 705 | 128  | 4      | 5         | 100   | 0.743         | 0.819390 | 1.106096         |
| 706 | 8    | 4      | 1         | 20000 | 0.8321        | 0.728350 | 1.105841         |
| 707 | 8    | 5      | 5         | 100   | 0.5471        | 0.960693 | 1.105553         |
| 708 | 8    | 5      | 6         | 20000 | 0.8321        | 0.725838 | 1.104188         |
| 709 | 8    | 3      | 7         | 5000  | 0.8244        | 0.734508 | 1.104145         |
| 710 | 8    | 4      | 8         | 5000  | 0.827         | 0.731517 | 1.104104         |
| 711 | 16   | 5      | 7         | 10000 | 0.8321        | 0.725275 | 1.103818         |
| 712 | 32   | 5      | 9         | 1000  | 0.8626        | 0.687126 | 1.102824         |
| 713 | 64   | 3      | 2         | 100   | 0.7176        | 0.836147 | 1.101858         |
| 714 | 16   | 5      | 6         | 2000  | 0.9186        | 0.607586 | 1.101357         |
| 715 | 8    | 3      | 6         | 2000  | 0.9033        | 0.629567 | 1.101047         |
| 716 | 32   | 3      | 2         | 500   | 0.7964        | 0.760154 | 1.100948         |
| 717 | 16   | 5      | 4         | 5000  | 0.8906        | 0.644148 | 1.099134         |
| 718 | 16   | 5      | 2         | 1000  | 0.57          | 0.939585 | 1.098963         |
| 719 | 128  | 5      | 5         | 100   | 0.6667        | 0.873369 | 1.098755         |
| 720 | 16   | 5      | 8         | 5000  | 0.8397        | 0.708460 | 1.098641         |
| 721 | 8    | 4      | 4         | 5000  | 0.8295        | 0.719260 | 1.097910         |
| 722 | 8    | 4      | 7         | 10000 | 0.827         | 0.720911 | 1.097106         |
| 723 | 8    | 4      | 10        | 10000 | 0.8295        | 0.716003 | 1.095779         |
| 724 | 16   | 4      | 3         | 500   | 0.715         | 0.828973 | 1.094724         |
| 725 | 32   | 5      | 1         | 1000  | 0.8702        | 0.664090 | 1.094652         |
| 726 | 16   | 5      | 10        | 500   | 0.7328        | 0.813162 | 1.094636         |
| 727 | 32   | 4      | 4         | 500   | 0.8499        | 0.688188 | 1.093587         |
| 728 | 32   | 3      | 6         | 100   | 0.7583        | 0.787483 | 1.093229         |

**Supplementary Table 4. Continued.**

| No. | node | layers | replicate | epoch | Test_Accuracy | Test_AUC | Euclidean length |
|-----|------|--------|-----------|-------|---------------|----------|------------------|
| 729 | 128  | 4      | 10        | 100   | 0.7201        | 0.821896 | 1.092729         |
| 730 | 16   | 5      | 3         | 1000  | 0.7557        | 0.788558 | 1.092202         |
| 731 | 16   | 3      | 5         | 1000  | 0.7735        | 0.770831 | 1.092008         |
| 732 | 32   | 5      | 3         | 1000  | 0.8168        | 0.723682 | 1.091274         |
| 733 | 8    | 5      | 7         | 2000  | 0.5776        | 0.924357 | 1.089980         |
| 734 | 16   | 4      | 6         | 1000  | 0.8397        | 0.694605 | 1.089758         |
| 735 | 8    | 3      | 3         | 500   | 0.542         | 0.944998 | 1.089397         |
| 736 | 8    | 3      | 5         | 20000 | 0.8346        | 0.699694 | 1.089095         |
| 737 | 32   | 5      | 4         | 1000  | 0.7786        | 0.760834 | 1.088616         |
| 738 | 16   | 3      | 9         | 1000  | 0.7786        | 0.760678 | 1.088508         |
| 739 | 16   | 5      | 7         | 2000  | 0.827         | 0.706492 | 1.087686         |
| 740 | 16   | 4      | 2         | 500   | 0.7048        | 0.826745 | 1.086394         |
| 741 | 16   | 3      | 7         | 1000  | 0.8397        | 0.685255 | 1.083822         |
| 742 | 32   | 3      | 10        | 500   | 0.8142        | 0.714119 | 1.082999         |
| 743 | 32   | 4      | 7         | 100   | 0.6565        | 0.860252 | 1.082139         |
| 744 | 16   | 4      | 1         | 1000  | 0.8397        | 0.682381 | 1.082007         |
| 745 | 8    | 5      | 5         | 10000 | 0.7939        | 0.733459 | 1.080851         |
| 746 | 32   | 3      | 4         | 500   | 0.8117        | 0.712805 | 1.080254         |
| 747 | 128  | 4      | 1         | 100   | 0.7786        | 0.748733 | 1.080194         |
| 748 | 8    | 5      | 6         | 5000  | 0.8066        | 0.716042 | 1.078573         |
| 749 | 8    | 5      | 5         | 5000  | 0.8219        | 0.698256 | 1.078463         |
| 750 | 8    | 5      | 6         | 1000  | 0.5674        | 0.917002 | 1.078348         |
| 751 | 64   | 4      | 10        | 100   | 0.7176        | 0.800161 | 1.074805         |
| 752 | 8    | 3      | 9         | 5000  | 0.8066        | 0.708273 | 1.073431         |
| 753 | 8    | 5      | 10        | 1000  | 0.5827        | 0.901281 | 1.073242         |
| 754 | 64   | 5      | 5         | 500   | 0.799         | 0.716139 | 1.072966         |
| 755 | 128  | 3      | 7         | 100   | 0.7201        | 0.794683 | 1.072411         |
| 756 | 64   | 4      | 2         | 100   | 0.7506        | 0.765470 | 1.072075         |
| 757 | 32   | 3      | 1         | 500   | 0.7735        | 0.740963 | 1.071134         |
| 758 | 8    | 3      | 7         | 500   | 0.5827        | 0.898348 | 1.070780         |
| 759 | 128  | 4      | 4         | 100   | 0.7735        | 0.740180 | 1.070592         |
| 760 | 128  | 5      | 8         | 100   | 0.6489        | 0.851407 | 1.070498         |
| 761 | 8    | 5      | 3         | 2000  | 0.5751        | 0.902712 | 1.070341         |
| 762 | 8    | 5      | 7         | 1000  | 0.5598        | 0.909854 | 1.068274         |
| 763 | 8    | 4      | 3         | 20000 | 0.8321        | 0.669438 | 1.067959         |
| 764 | 32   | 5      | 10        | 1000  | 0.8244        | 0.678295 | 1.067577         |
| 765 | 16   | 5      | 10        | 5000  | 0.827         | 0.674715 | 1.067319         |
| 766 | 8    | 5      | 7         | 5000  | 0.8219        | 0.680574 | 1.067099         |
| 767 | 128  | 3      | 5         | 100   | 0.8066        | 0.695162 | 1.064825         |
| 768 | 32   | 4      | 2         | 1000  | 0.8321        | 0.663067 | 1.063977         |
| 769 | 32   | 3      | 5         | 500   | 0.7634        | 0.741021 | 1.063904         |
| 770 | 128  | 4      | 7         | 100   | 0.7379        | 0.766201 | 1.063748         |
| 771 | 8    | 5      | 1         | 10000 | 0.827         | 0.667664 | 1.062875         |
| 772 | 8    | 3      | 6         | 5000  | 0.8117        | 0.685812 | 1.062636         |
| 773 | 128  | 4      | 2         | 100   | 0.7455        | 0.756651 | 1.062210         |
| 774 | 16   | 5      | 6         | 100   | 0.5827        | 0.888021 | 1.062130         |
| 775 | 8    | 4      | 2         | 5000  | 0.8244        | 0.669483 | 1.062000         |
| 776 | 16   | 4      | 7         | 2000  | 0.8346        | 0.656022 | 1.061566         |
| 777 | 64   | 3      | 4         | 100   | 0.6947        | 0.802420 | 1.061361         |
| 778 | 16   | 3      | 1         | 100   | 0.5598        | 0.901385 | 1.061071         |
| 779 | 64   | 4      | 4         | 100   | 0.7379        | 0.760549 | 1.059684         |
| 780 | 32   | 4      | 5         | 500   | 0.8015        | 0.691821 | 1.058781         |

**Supplementary Table 4. Continued.**

| No. | node | layers | replicate | epoch | Test_Accuracy | Test_AUC | Euclidean length |
|-----|------|--------|-----------|-------|---------------|----------|------------------|
| 781 | 64   | 3      | 9         | 100   | 0.6997        | 0.791426 | 1.056379         |
| 782 | 8    | 5      | 8         | 5000  | 0.5878        | 0.877409 | 1.056104         |
| 783 | 8    | 4      | 2         | 10000 | 0.8219        | 0.662575 | 1.055711         |
| 784 | 32   | 3      | 8         | 500   | 0.7964        | 0.690267 | 1.053908         |
| 785 | 32   | 5      | 6         | 500   | 0.7659        | 0.723255 | 1.053423         |
| 786 | 8    | 5      | 9         | 1000  | 0.5929        | 0.870119 | 1.052919         |
| 787 | 8    | 5      | 3         | 10000 | 0.8295        | 0.648033 | 1.052624         |
| 788 | 128  | 5      | 2         | 100   | 0.7303        | 0.755032 | 1.050434         |
| 789 | 64   | 3      | 5         | 100   | 0.6896        | 0.791219 | 1.049560         |
| 790 | 16   | 4      | 4         | 500   | 0.7099        | 0.772255 | 1.048969         |
| 791 | 16   | 5      | 10        | 1000  | 0.8142        | 0.660898 | 1.048669         |
| 792 | 16   | 5      | 3         | 20000 | 0.8321        | 0.638211 | 1.048667         |
| 793 | 8    | 3      | 6         | 500   | 0.57          | 0.880109 | 1.048567         |
| 794 | 8    | 5      | 1         | 1000  | 0.5674        | 0.876542 | 1.044159         |
| 795 | 8    | 4      | 10        | 1000  | 0.5802        | 0.867315 | 1.043488         |
| 796 | 8    | 5      | 4         | 10000 | 0.8321        | 0.629379 | 1.043316         |
| 797 | 32   | 5      | 4         | 500   | 0.7099        | 0.764343 | 1.043158         |
| 798 | 16   | 4      | 1         | 5000  | 0.8295        | 0.632429 | 1.043090         |
| 799 | 32   | 3      | 4         | 100   | 0.7583        | 0.715738 | 1.042737         |
| 800 | 16   | 4      | 4         | 5000  | 0.8346        | 0.624698 | 1.042499         |
| 801 | 32   | 4      | 4         | 100   | 0.6514        | 0.813874 | 1.042455         |
| 802 | 8    | 4      | 9         | 20000 | 0.8295        | 0.628479 | 1.040700         |
| 803 | 16   | 4      | 2         | 1000  | 0.7863        | 0.681507 | 1.040538         |
| 804 | 32   | 4      | 6         | 500   | 0.7812        | 0.684834 | 1.038880         |
| 805 | 8    | 4      | 9         | 1000  | 0.5674        | 0.870112 | 1.038768         |
| 806 | 8    | 5      | 2         | 5000  | 0.8015        | 0.660276 | 1.038444         |
| 807 | 128  | 4      | 6         | 100   | 0.6947        | 0.771264 | 1.038006         |
| 808 | 128  | 5      | 1         | 100   | 0.7328        | 0.734624 | 1.037627         |
| 809 | 8    | 3      | 10        | 1000  | 0.7252        | 0.741863 | 1.037437         |
| 810 | 8    | 3      | 7         | 2000  | 0.8244        | 0.628259 | 1.036506         |
| 811 | 32   | 5      | 10        | 100   | 0.6234        | 0.826221 | 1.035021         |
| 812 | 128  | 3      | 3         | 100   | 0.715         | 0.748325 | 1.034995         |
| 813 | 8    | 4      | 9         | 2000  | 0.7939        | 0.663287 | 1.034518         |
| 814 | 32   | 5      | 2         | 500   | 0.7125        | 0.749930 | 1.034433         |
| 815 | 16   | 4      | 5         | 500   | 0.715         | 0.747049 | 1.034073         |
| 816 | 32   | 5      | 2         | 100   | 0.598         | 0.843262 | 1.033777         |
| 817 | 128  | 3      | 2         | 100   | 0.715         | 0.743197 | 1.031294         |
| 818 | 8    | 3      | 2         | 1000  | 0.5623        | 0.863547 | 1.030483         |
| 819 | 64   | 3      | 7         | 100   | 0.659         | 0.790170 | 1.028907         |
| 820 | 64   | 3      | 8         | 100   | 0.6107        | 0.827710 | 1.028620         |
| 821 | 64   | 5      | 8         | 100   | 0.6005        | 0.834774 | 1.028323         |
| 822 | 8    | 3      | 9         | 2000  | 0.7455        | 0.708091 | 1.028185         |
| 823 | 16   | 4      | 10        | 500   | 0.6921        | 0.760024 | 1.027930         |
| 824 | 8    | 5      | 2         | 2000  | 0.5776        | 0.847374 | 1.025507         |
| 825 | 64   | 4      | 7         | 100   | 0.7125        | 0.737208 | 1.025247         |
| 826 | 8    | 5      | 9         | 10000 | 0.8168        | 0.619596 | 1.025213         |
| 827 | 32   | 3      | 2         | 100   | 0.598         | 0.832521 | 1.025034         |
| 828 | 32   | 5      | 7         | 1000  | 0.7557        | 0.691659 | 1.024439         |
| 829 | 16   | 5      | 5         | 1000  | 0.7303        | 0.715453 | 1.022356         |
| 830 | 64   | 3      | 1         | 100   | 0.7048        | 0.739856 | 1.021827         |
| 831 | 8    | 3      | 9         | 500   | 0.5674        | 0.848688 | 1.020889         |
| 832 | 32   | 4      | 2         | 500   | 0.7786        | 0.659868 | 1.020610         |

**Supplementary Table 4. Continued.**

| No. | node | layers | replicate | epoch | Test_Accuracy | Test_AUC | Euclidean length |
|-----|------|--------|-----------|-------|---------------|----------|------------------|
| 833 | 16   | 3      | 9         | 2000  | 0.771         | 0.668363 | 1.020368         |
| 834 | 8    | 5      | 4         | 1000  | 0.5573        | 0.854437 | 1.020121         |
| 835 | 8    | 5      | 2         | 20000 | 0.8295        | 0.592849 | 1.019579         |
| 836 | 8    | 5      | 1         | 2000  | 0.5852        | 0.834878 | 1.019549         |
| 837 | 8    | 3      | 1         | 2000  | 0.8193        | 0.601674 | 1.016496         |
| 838 | 16   | 4      | 2         | 100   | 0.5598        | 0.847995 | 1.016106         |
| 839 | 128  | 5      | 7         | 100   | 0.6845        | 0.749076 | 1.014719         |
| 840 | 8    | 4      | 5         | 5000  | 0.8321        | 0.578838 | 1.013629         |
| 841 | 8    | 5      | 10        | 10    | 0.3842        | 0.937772 | 1.013423         |
| 842 | 32   | 5      | 7         | 500   | 0.7354        | 0.696618 | 1.012961         |
| 843 | 128  | 5      | 3         | 10    | 0.5623        | 0.842518 | 1.012925         |
| 844 | 16   | 5      | 9         | 2000  | 0.7837        | 0.641739 | 1.012924         |
| 845 | 128  | 3      | 7         | 10    | 0.5903        | 0.822090 | 1.012070         |
| 846 | 8    | 3      | 1         | 100   | 0.5013        | 0.878627 | 1.011576         |
| 847 | 64   | 5      | 3         | 100   | 0.5598        | 0.841508 | 1.010698         |
| 848 | 16   | 4      | 7         | 500   | 0.5725        | 0.832793 | 1.010594         |
| 849 | 8    | 3      | 10        | 2000  | 0.8448        | 0.551632 | 1.008952         |
| 850 | 32   | 3      | 5         | 100   | 0.6947        | 0.729632 | 1.007458         |
| 851 | 16   | 4      | 4         | 10    | 0.4148        | 0.917144 | 1.006585         |
| 852 | 8    | 5      | 4         | 20000 | 0.8295        | 0.569890 | 1.006402         |
| 853 | 8    | 5      | 5         | 2000  | 0.5852        | 0.816982 | 1.004947         |
| 854 | 128  | 5      | 10        | 100   | 0.6819        | 0.737693 | 1.004579         |
| 855 | 16   | 5      | 1         | 500   | 0.7277        | 0.691698 | 1.003988         |
| 856 | 8    | 4      | 8         | 2000  | 0.7786        | 0.633801 | 1.003953         |
| 857 | 16   | 4      | 9         | 500   | 0.6768        | 0.739273 | 1.002289         |
| 858 | 64   | 4      | 10        | 10    | 0.4377        | 0.901236 | 1.001902         |
| 859 | 16   | 3      | 8         | 500   | 0.7252        | 0.690403 | 1.001285         |
| 860 | 128  | 5      | 6         | 10    | 0.5064        | 0.862207 | 0.999921         |
| 861 | 16   | 5      | 3         | 5000  | 0.8321        | 0.554429 | 0.999891         |
| 862 | 16   | 3      | 5         | 500   | 0.7405        | 0.669114 | 0.998025         |
| 863 | 32   | 5      | 7         | 100   | 0.4122        | 0.908494 | 0.997632         |
| 864 | 128  | 5      | 9         | 100   | 0.6412        | 0.764032 | 0.997438         |
| 865 | 8    | 5      | 7         | 10000 | 0.8219        | 0.562296 | 0.995839         |
| 866 | 8    | 4      | 4         | 1000  | 0.6539        | 0.750766 | 0.995607         |
| 867 | 128  | 3      | 9         | 10    | 0.5471        | 0.829031 | 0.993283         |
| 868 | 16   | 3      | 6         | 500   | 0.7252        | 0.677952 | 0.992741         |
| 869 | 64   | 4      | 6         | 100   | 0.7074        | 0.695951 | 0.992352         |
| 870 | 128  | 5      | 3         | 100   | 0.6336        | 0.762582 | 0.991453         |
| 871 | 16   | 3      | 7         | 500   | 0.5674        | 0.808403 | 0.987653         |
| 872 | 16   | 5      | 9         | 500   | 0.5878        | 0.792922 | 0.987033         |
| 873 | 16   | 3      | 4         | 500   | 0.5852        | 0.792378 | 0.985049         |
| 874 | 16   | 3      | 2         | 500   | 0.6412        | 0.747211 | 0.984613         |
| 875 | 8    | 4      | 2         | 1000  | 0.6794        | 0.712196 | 0.984280         |
| 876 | 16   | 5      | 9         | 1000  | 0.8066        | 0.561952 | 0.983053         |
| 877 | 64   | 5      | 5         | 100   | 0.5802        | 0.793013 | 0.982599         |
| 878 | 64   | 5      | 6         | 100   | 0.6768        | 0.709613 | 0.980616         |
| 879 | 8    | 4      | 6         | 5000  | 0.7532        | 0.627120 | 0.980097         |
| 880 | 8    | 5      | 4         | 5000  | 0.8117        | 0.545222 | 0.977816         |
| 881 | 128  | 4      | 3         | 10    | 0.3969        | 0.893110 | 0.977331         |
| 882 | 16   | 3      | 2         | 10    | 0.4835        | 0.847361 | 0.975598         |
| 883 | 8    | 4      | 5         | 10    | 0.2163        | 0.950871 | 0.975162         |
| 884 | 8    | 3      | 1         | 1000  | 0.7405        | 0.634229 | 0.974980         |

**Supplementary Table 4. Continued.**

| No. | node | layers | replicate | epoch | Test_Accuracy | Test_AUC | Euclidean length |
|-----|------|--------|-----------|-------|---------------|----------|------------------|
| 885 | 8    | 5      | 8         | 500   | 0.5725        | 0.785923 | 0.972333         |
| 886 | 16   | 5      | 7         | 100   | 0.4198        | 0.872761 | 0.968475         |
| 887 | 64   | 5      | 9         | 10    | 0.4122        | 0.875642 | 0.967811         |
| 888 | 16   | 4      | 4         | 1000  | 0.5598        | 0.788416 | 0.966941         |
| 889 | 32   | 5      | 9         | 500   | 0.7023        | 0.661875 | 0.965041         |
| 890 | 32   | 3      | 1         | 100   | 0.5573        | 0.787386 | 0.964655         |
| 891 | 128  | 4      | 6         | 10    | 0.514         | 0.816172 | 0.964538         |
| 892 | 8    | 3      | 9         | 100   | 0.4478        | 0.853622 | 0.963947         |
| 893 | 8    | 3      | 6         | 1000  | 0.5751        | 0.772339 | 0.962937         |
| 894 | 8    | 3      | 2         | 100   | 0.5496        | 0.789659 | 0.962092         |
| 895 | 32   | 3      | 3         | 100   | 0.6107        | 0.743404 | 0.962083         |
| 896 | 16   | 5      | 7         | 500   | 0.5674        | 0.774469 | 0.960076         |
| 897 | 16   | 5      | 10        | 2000  | 0.7048        | 0.651671 | 0.959906         |
| 898 | 8    | 3      | 4         | 2000  | 0.7913        | 0.537019 | 0.956318         |
| 899 | 32   | 5      | 1         | 500   | 0.6794        | 0.672889 | 0.956224         |
| 900 | 32   | 3      | 1         | 10    | 0.4046        | 0.866299 | 0.956125         |
| 901 | 64   | 5      | 9         | 100   | 0.5776        | 0.760147 | 0.954697         |
| 902 | 8    | 5      | 3         | 5000  | 0.687         | 0.662400 | 0.954328         |
| 903 | 8    | 5      | 8         | 10    | 0.4122        | 0.856794 | 0.950792         |
| 904 | 128  | 5      | 8         | 10    | 0.5522        | 0.773880 | 0.950692         |
| 905 | 64   | 5      | 10        | 100   | 0.6285        | 0.712462 | 0.950060         |
| 906 | 64   | 3      | 6         | 100   | 0.6819        | 0.659901 | 0.948924         |
| 907 | 64   | 5      | 7         | 100   | 0.7201        | 0.617285 | 0.948464         |
| 908 | 16   | 4      | 3         | 100   | 0.5725        | 0.755958 | 0.948277         |
| 909 | 16   | 5      | 2         | 500   | 0.598         | 0.735822 | 0.948176         |
| 910 | 8    | 3      | 8         | 500   | 0.5623        | 0.761643 | 0.946721         |
| 911 | 16   | 3      | 1         | 1000  | 0.659         | 0.679558 | 0.946615         |
| 912 | 16   | 4      | 8         | 500   | 0.598         | 0.733556 | 0.946419         |
| 913 | 16   | 5      | 4         | 1000  | 0.5827        | 0.739629 | 0.941589         |
| 914 | 64   | 4      | 8         | 100   | 0.7226        | 0.599946 | 0.939194         |
| 915 | 64   | 5      | 4         | 100   | 0.6336        | 0.692067 | 0.938299         |
| 916 | 8    | 5      | 7         | 100   | 0.4148        | 0.841145 | 0.937861         |
| 917 | 16   | 3      | 4         | 100   | 0.5674        | 0.744285 | 0.935896         |
| 918 | 32   | 4      | 9         | 500   | 0.6921        | 0.629567 | 0.935605         |
| 919 | 64   | 3      | 10        | 100   | 0.7303        | 0.584271 | 0.935259         |
| 920 | 8    | 5      | 8         | 1000  | 0.4885        | 0.796580 | 0.934437         |
| 921 | 8    | 3      | 9         | 1000  | 0.6997        | 0.619253 | 0.934374         |
| 922 | 32   | 4      | 2         | 100   | 0.659         | 0.660360 | 0.932929         |
| 923 | 8    | 5      | 8         | 10000 | 0.8244        | 0.434655 | 0.931966         |
| 924 | 16   | 4      | 5         | 1000  | 0.7226        | 0.587968 | 0.931588         |
| 925 | 32   | 3      | 7         | 100   | 0.7048        | 0.609042 | 0.931491         |
| 926 | 32   | 5      | 8         | 100   | 0.5776        | 0.730532 | 0.931289         |
| 927 | 8    | 4      | 10        | 100   | 0.4122        | 0.833408 | 0.929773         |
| 928 | 16   | 5      | 4         | 500   | 0.5674        | 0.734255 | 0.927941         |
| 929 | 64   | 4      | 1         | 100   | 0.7023        | 0.606252 | 0.927775         |
| 930 | 32   | 3      | 10        | 100   | 0.57          | 0.728823 | 0.925248         |
| 931 | 16   | 3      | 10        | 100   | 0.6209        | 0.682076 | 0.922358         |
| 932 | 64   | 5      | 2         | 100   | 0.6412        | 0.660134 | 0.920279         |
| 933 | 16   | 3      | 10        | 1000  | 0.7226        | 0.569457 | 0.920017         |
| 934 | 128  | 3      | 2         | 10    | 0.5776        | 0.715932 | 0.919881         |
| 935 | 32   | 4      | 6         | 100   | 0.5318        | 0.746473 | 0.916533         |
| 936 | 32   | 4      | 1         | 500   | 0.7354        | 0.545721 | 0.915764         |



**Supplementary Table 4. Continued.**

| No. | node | layers | replicate | epoch | Test_Accuracy | Test_AUC | Euclidean length |
|-----|------|--------|-----------|-------|---------------|----------|------------------|
| 937 | 16   | 4      | 1         | 500   | 0.57          | 0.715693 | 0.914940         |
| 938 | 16   | 3      | 8         | 1000  | 0.6641        | 0.628835 | 0.914583         |
| 939 | 16   | 4      | 8         | 100   | 0.4911        | 0.771064 | 0.914176         |
| 940 | 16   | 4      | 7         | 100   | 0.4071        | 0.816755 | 0.912589         |
| 941 | 16   | 4      | 6         | 500   | 0.6565        | 0.632740 | 0.911785         |
| 942 | 16   | 5      | 2         | 100   | 0.5522        | 0.722083 | 0.909026         |
| 943 | 8    | 5      | 10        | 10000 | 0.5878        | 0.692358 | 0.908223         |
| 944 | 16   | 5      | 5         | 500   | 0.57          | 0.704925 | 0.906543         |
| 945 | 16   | 4      | 7         | 10    | 0.3613        | 0.830727 | 0.905895         |
| 946 | 8    | 4      | 8         | 10000 | 0.8219        | 0.380935 | 0.905887         |
| 947 | 8    | 3      | 5         | 1000  | 0.5751        | 0.698761 | 0.904990         |
| 948 | 64   | 4      | 5         | 10    | 0.3817        | 0.820426 | 0.904872         |
| 949 | 8    | 4      | 10        | 5000  | 0.5802        | 0.694281 | 0.904797         |
| 950 | 8    | 4      | 6         | 10    | 0.2443        | 0.871148 | 0.904755         |
| 951 | 64   | 4      | 9         | 10    | 0.5674        | 0.702892 | 0.903327         |
| 952 | 8    | 4      | 9         | 500   | 0.4427        | 0.787354 | 0.903277         |
| 953 | 8    | 4      | 1         | 1000  | 0.5852        | 0.687152 | 0.902573         |
| 954 | 32   | 5      | 3         | 500   | 0.687         | 0.584238 | 0.901833         |
| 955 | 128  | 3      | 6         | 10    | 0.4529        | 0.778432 | 0.900597         |
| 956 | 128  | 4      | 2         | 10    | 0.626         | 0.643759 | 0.897943         |
| 957 | 8    | 5      | 8         | 2000  | 0.7125        | 0.543526 | 0.896145         |
| 958 | 64   | 3      | 5         | 10    | 0.5318        | 0.720516 | 0.895519         |
| 959 | 16   | 4      | 4         | 100   | 0.4402        | 0.776832 | 0.892886         |
| 960 | 128  | 3      | 1         | 10    | 0.4835        | 0.749736 | 0.892119         |
| 961 | 8    | 4      | 4         | 500   | 0.4606        | 0.761462 | 0.889931         |
| 962 | 8    | 5      | 5         | 1000  | 0.5573        | 0.691102 | 0.887809         |
| 963 | 32   | 3      | 2         | 10    | 0.4351        | 0.773161 | 0.887181         |
| 964 | 8    | 5      | 7         | 500   | 0.7125        | 0.526854 | 0.886133         |
| 965 | 8    | 3      | 5         | 2000  | 0.5751        | 0.673355 | 0.885521         |
| 966 | 16   | 3      | 3         | 500   | 0.6438        | 0.607683 | 0.885300         |
| 967 | 8    | 5      | 10        | 20000 | 0.5878        | 0.657771 | 0.882140         |
| 968 | 16   | 5      | 6         | 500   | 0.6616        | 0.583241 | 0.881978         |
| 969 | 32   | 4      | 9         | 10    | 0.3613        | 0.801125 | 0.878828         |
| 970 | 64   | 4      | 4         | 10    | 0.4148        | 0.774605 | 0.878676         |
| 971 | 8    | 4      | 10        | 2000  | 0.5802        | 0.659033 | 0.878041         |
| 972 | 32   | 5      | 1         | 10    | 0.4377        | 0.760672 | 0.877612         |
| 973 | 32   | 3      | 9         | 100   | 0.631         | 0.609424 | 0.877245         |
| 974 | 8    | 3      | 2         | 10    | 0.2748        | 0.831647 | 0.875872         |
| 975 | 8    | 5      | 2         | 500   | 0.4122        | 0.771459 | 0.874675         |
| 976 | 16   | 5      | 6         | 1000  | 0.7455        | 0.456325 | 0.874073         |
| 977 | 32   | 4      | 3         | 10    | 0.3791        | 0.786758 | 0.873330         |
| 978 | 16   | 5      | 8         | 1000  | 0.6539        | 0.577323 | 0.872289         |
| 979 | 16   | 3      | 9         | 500   | 0.626         | 0.607081 | 0.872022         |
| 980 | 8    | 4      | 6         | 1000  | 0.6972        | 0.523014 | 0.871568         |
| 981 | 8    | 5      | 9         | 2000  | 0.6514        | 0.576566 | 0.869914         |
| 982 | 8    | 5      | 2         | 100   | 0.4198        | 0.760704 | 0.868851         |
| 983 | 8    | 5      | 2         | 10000 | 0.5751        | 0.648797 | 0.866993         |
| 984 | 32   | 4      | 8         | 100   | 0.6387        | 0.586032 | 0.866816         |
| 985 | 8    | 4      | 4         | 100   | 0.4453        | 0.743365 | 0.866536         |
| 986 | 16   | 5      | 2         | 10    | 0.3766        | 0.774223 | 0.860958         |
| 987 | 16   | 3      | 6         | 100   | 0.486         | 0.710014 | 0.860416         |
| 988 | 128  | 5      | 9         | 10    | 0.4402        | 0.736897 | 0.858367         |

**Supplementary Table 4. Continued.**

| No.  | node | layers | replicate | epoch | Test_Accuracy | Test_AUC | Euclidean length |
|------|------|--------|-----------|-------|---------------|----------|------------------|
| 989  | 8    | 4      | 1         | 2000  | 0.6921        | 0.507650 | 0.858319         |
| 990  | 128  | 4      | 9         | 10    | 0.6056        | 0.606737 | 0.857252         |
| 991  | 128  | 4      | 8         | 10    | 0.3969        | 0.759584 | 0.857028         |
| 992  | 32   | 5      | 2         | 10    | 0.173         | 0.838885 | 0.856538         |
| 993  | 8    | 3      | 6         | 10    | 0.257         | 0.816224 | 0.855728         |
| 994  | 16   | 5      | 3         | 500   | 0.6209        | 0.581920 | 0.850969         |
| 995  | 64   | 4      | 6         | 10    | 0.3868        | 0.757486 | 0.850529         |
| 996  | 8    | 5      | 10        | 100   | 0.4122        | 0.742472 | 0.849219         |
| 997  | 128  | 4      | 10        | 10    | 0.4148        | 0.736878 | 0.845605         |
| 998  | 16   | 3      | 5         | 100   | 0.5216        | 0.664763 | 0.844971         |
| 999  | 8    | 5      | 4         | 2000  | 0.5929        | 0.600483 | 0.843866         |
| 1000 | 16   | 3      | 3         | 100   | 0.514         | 0.669224 | 0.843835         |
| 1001 | 16   | 5      | 4         | 100   | 0.5623        | 0.628810 | 0.843554         |
| 1002 | 32   | 5      | 9         | 10    | 0.4402        | 0.718146 | 0.842324         |
| 1003 | 16   | 3      | 10        | 500   | 0.6132        | 0.575115 | 0.840697         |
| 1004 | 8    | 4      | 3         | 1000  | 0.5471        | 0.636547 | 0.839351         |
| 1005 | 16   | 3      | 7         | 10    | 0.5191        | 0.655964 | 0.836513         |
| 1006 | 8    | 5      | 3         | 10    | 0.1858        | 0.815402 | 0.836302         |
| 1007 | 16   | 5      | 7         | 1000  | 0.6081        | 0.573652 | 0.835980         |
| 1008 | 8    | 5      | 9         | 100   | 0.1781        | 0.815985 | 0.835195         |
| 1009 | 16   | 3      | 5         | 10    | 0.4427        | 0.703022 | 0.830796         |
| 1010 | 8    | 4      | 4         | 10    | 0.4122        | 0.719940 | 0.829592         |
| 1011 | 32   | 5      | 3         | 10    | 0.4377        | 0.702763 | 0.827923         |
| 1012 | 8    | 5      | 1         | 500   | 0.4122        | 0.716554 | 0.826655         |
| 1013 | 16   | 5      | 3         | 100   | 0.57          | 0.598133 | 0.826234         |
| 1014 | 16   | 5      | 8         | 100   | 0.514         | 0.646589 | 0.825998         |
| 1015 | 32   | 5      | 6         | 100   | 0.5394        | 0.625300 | 0.825804         |
| 1016 | 16   | 3      | 8         | 100   | 0.5852        | 0.582315 | 0.825560         |
| 1017 | 8    | 4      | 10        | 500   | 0.4122        | 0.710733 | 0.821614         |
| 1018 | 16   | 4      | 6         | 100   | 0.5242        | 0.631548 | 0.820755         |
| 1019 | 8    | 5      | 2         | 1000  | 0.4122        | 0.708402 | 0.819599         |
| 1020 | 64   | 5      | 6         | 10    | 0.4606        | 0.677810 | 0.819499         |
| 1021 | 32   | 5      | 1         | 100   | 0.4936        | 0.651788 | 0.817599         |
| 1022 | 8    | 4      | 6         | 500   | 0.4453        | 0.685314 | 0.817280         |
| 1023 | 64   | 5      | 1         | 100   | 0.5369        | 0.609560 | 0.812296         |
| 1024 | 16   | 5      | 1         | 100   | 0.3155        | 0.748519 | 0.812294         |
| 1025 | 16   | 3      | 9         | 100   | 0.3944        | 0.709606 | 0.811845         |
| 1026 | 64   | 4      | 1         | 10    | 0.3282        | 0.740834 | 0.810277         |
| 1027 | 32   | 5      | 3         | 100   | 0.5725        | 0.571775 | 0.809124         |
| 1028 | 128  | 3      | 8         | 10    | 0.5064        | 0.627476 | 0.806329         |
| 1029 | 128  | 5      | 7         | 10    | 0.3053        | 0.744744 | 0.804893         |
| 1030 | 8    | 3      | 5         | 100   | 0.5165        | 0.616365 | 0.804163         |
| 1031 | 8    | 4      | 10        | 10    | 0.2697        | 0.757428 | 0.804012         |
| 1032 | 16   | 4      | 2         | 10    | 0.4173        | 0.686039 | 0.802987         |
| 1033 | 16   | 5      | 10        | 100   | 0.4326        | 0.676152 | 0.802698         |
| 1034 | 8    | 3      | 4         | 5000  | 0.6489        | 0.470544 | 0.801550         |
| 1035 | 16   | 4      | 6         | 10    | 0.2036        | 0.774851 | 0.801154         |
| 1036 | 8    | 4      | 7         | 500   | 0.5852        | 0.543047 | 0.798347         |
| 1037 | 32   | 4      | 7         | 10    | 0.2468        | 0.758988 | 0.798106         |
| 1038 | 8    | 4      | 2         | 10    | 0.2799        | 0.747315 | 0.798012         |
| 1039 | 8    | 3      | 8         | 10    | 0.3461        | 0.717305 | 0.796437         |
| 1040 | 8    | 4      | 2         | 100   | 0.4122        | 0.679791 | 0.795000         |

**Supplementary Table 4. Continued.**

| No.  | node | layers | replicate | epoch | Test_Accuracy | Test_AUC | Euclidean length |
|------|------|--------|-----------|-------|---------------|----------|------------------|
| 1041 | 8    | 3      | 2         | 500   | 0.4122        | 0.676016 | 0.791774         |
| 1042 | 16   | 4      | 9         | 100   | 0.4148        | 0.672364 | 0.790021         |
| 1043 | 8    | 5      | 6         | 2000  | 0.7023        | 0.358817 | 0.788654         |
| 1044 | 16   | 4      | 7         | 1000  | 0.5802        | 0.533393 | 0.788124         |
| 1045 | 32   | 5      | 4         | 100   | 0.5369        | 0.576469 | 0.787768         |
| 1046 | 8    | 4      | 8         | 100   | 0.4046        | 0.674669 | 0.786689         |
| 1047 | 16   | 4      | 1         | 10    | 0.4148        | 0.668253 | 0.786525         |
| 1048 | 8    | 5      | 6         | 100   | 0.4835        | 0.620004 | 0.786242         |
| 1049 | 16   | 4      | 10        | 100   | 0.5115        | 0.595860 | 0.785291         |
| 1050 | 8    | 4      | 3         | 500   | 0.5471        | 0.559233 | 0.782343         |
| 1051 | 32   | 3      | 8         | 100   | 0.5725        | 0.532668 | 0.781979         |
| 1052 | 16   | 5      | 8         | 500   | 0.6056        | 0.494662 | 0.781947         |
| 1053 | 128  | 5      | 5         | 10    | 0.4097        | 0.664252 | 0.780439         |
| 1054 | 16   | 5      | 5         | 10    | 0.2087        | 0.751063 | 0.779520         |
| 1055 | 16   | 5      | 8         | 10    | 0.3817        | 0.675880 | 0.776214         |
| 1056 | 16   | 5      | 3         | 10    | 0.1679        | 0.757247 | 0.775637         |
| 1057 | 16   | 3      | 7         | 100   | 0.5445        | 0.546472 | 0.771435         |
| 1058 | 32   | 4      | 10        | 100   | 0.5954        | 0.489948 | 0.771071         |
| 1059 | 16   | 4      | 1         | 100   | 0.4122        | 0.651529 | 0.770973         |
| 1060 | 8    | 3      | 2         | 2000  | 0.5725        | 0.507598 | 0.765122         |
| 1061 | 8    | 4      | 7         | 10    | 0.4427        | 0.623649 | 0.764802         |
| 1062 | 8    | 5      | 9         | 10    | 0.2824        | 0.706278 | 0.760644         |
| 1063 | 16   | 3      | 1         | 500   | 0.5547        | 0.517414 | 0.758557         |
| 1064 | 64   | 3      | 7         | 10    | 0.3868        | 0.651361 | 0.757552         |
| 1065 | 64   | 3      | 8         | 10    | 0.4784        | 0.587035 | 0.757283         |
| 1066 | 8    | 4      | 1         | 500   | 0.5522        | 0.513827 | 0.754283         |
| 1067 | 128  | 3      | 3         | 10    | 0.4173        | 0.627269 | 0.753396         |
| 1068 | 16   | 4      | 9         | 10    | 0.2265        | 0.716314 | 0.751271         |
| 1069 | 8    | 5      | 4         | 500   | 0.5318        | 0.530473 | 0.751141         |
| 1070 | 8    | 4      | 5         | 1000  | 0.5344        | 0.526996 | 0.750539         |
| 1071 | 8    | 3      | 9         | 10    | 0.3155        | 0.680807 | 0.750359         |
| 1072 | 32   | 4      | 8         | 10    | 0.4198        | 0.617880 | 0.746999         |
| 1073 | 16   | 3      | 6         | 10    | 0.3511        | 0.656851 | 0.744798         |
| 1074 | 16   | 3      | 10        | 10    | 0.0204        | 0.744440 | 0.744719         |
| 1075 | 128  | 4      | 7         | 10    | 0.4631        | 0.575057 | 0.738344         |
| 1076 | 32   | 4      | 3         | 100   | 0.542         | 0.500767 | 0.737924         |
| 1077 | 8    | 3      | 10        | 100   | 0.3562        | 0.646129 | 0.737808         |
| 1078 | 16   | 5      | 1         | 1000  | 0.5827        | 0.451877 | 0.737382         |
| 1079 | 16   | 5      | 9         | 100   | 0.4148        | 0.608421 | 0.736366         |
| 1080 | 64   | 3      | 4         | 10    | 0.3232        | 0.659299 | 0.734257         |
| 1081 | 64   | 5      | 8         | 10    | 0.4707        | 0.562205 | 0.733235         |
| 1082 | 8    | 5      | 3         | 500   | 0.4122        | 0.606077 | 0.732965         |
| 1083 | 8    | 4      | 8         | 1000  | 0.4402        | 0.585371 | 0.732418         |
| 1084 | 16   | 5      | 1         | 10    | 0.1985        | 0.693718 | 0.721558         |
| 1085 | 32   | 5      | 9         | 100   | 0.4097        | 0.592966 | 0.720738         |
| 1086 | 64   | 5      | 4         | 10    | 0.5344        | 0.474810 | 0.714862         |
| 1087 | 8    | 5      | 10        | 2000  | 0.4122        | 0.580528 | 0.711984         |
| 1088 | 16   | 3      | 8         | 10    | 0.3511        | 0.616585 | 0.709541         |
| 1089 | 32   | 3      | 8         | 10    | 0.2137        | 0.671387 | 0.704576         |
| 1090 | 8    | 3      | 3         | 1000  | 0.5191        | 0.470854 | 0.700834         |
| 1091 | 128  | 5      | 4         | 10    | 0.369         | 0.587857 | 0.694073         |
| 1092 | 32   | 4      | 1         | 100   | 0.6336        | 0.278785 | 0.692221         |

**Supplementary Table 4. Continued.**

| No.  | node | layers | replicate | epoch | Test_Accuracy | Test_AUC | Euclidean length |
|------|------|--------|-----------|-------|---------------|----------|------------------|
| 1093 | 32   | 3      | 9         | 10    | 0.369         | 0.584640 | 0.691350         |
| 1094 | 128  | 3      | 10        | 10    | 0.5089        | 0.467028 | 0.690720         |
| 1095 | 32   | 5      | 10        | 10    | 0.3562        | 0.589910 | 0.689110         |
| 1096 | 8    | 5      | 6         | 10    | 0.2443        | 0.644310 | 0.689070         |
| 1097 | 16   | 3      | 9         | 10    | 0.4097        | 0.550363 | 0.686115         |
| 1098 | 16   | 3      | 4         | 10    | 0.1603        | 0.665909 | 0.684931         |
| 1099 | 128  | 3      | 5         | 10    | 0.4148        | 0.544445 | 0.684456         |
| 1100 | 128  | 5      | 10        | 10    | 0.4097        | 0.541454 | 0.678989         |
| 1101 | 32   | 3      | 4         | 10    | 0.2417        | 0.632901 | 0.677483         |
| 1102 | 32   | 4      | 9         | 100   | 0.486         | 0.470926 | 0.676733         |
| 1103 | 64   | 4      | 2         | 10    | 0.4071        | 0.539952 | 0.676224         |
| 1104 | 128  | 4      | 5         | 10    | 0.4071        | 0.539116 | 0.675557         |
| 1105 | 8    | 4      | 2         | 500   | 0.4122        | 0.535089 | 0.675448         |
| 1106 | 8    | 3      | 3         | 100   | 0.4377        | 0.506549 | 0.669457         |
| 1107 | 8    | 4      | 8         | 500   | 0.5547        | 0.374085 | 0.669053         |
| 1108 | 64   | 5      | 1         | 10    | 0.3511        | 0.566219 | 0.666240         |
| 1109 | 8    | 5      | 5         | 10    | 0.3613        | 0.558391 | 0.665085         |
| 1110 | 16   | 3      | 3         | 10    | 0.3791        | 0.537576 | 0.657803         |
| 1111 | 32   | 4      | 5         | 10    | 0.43          | 0.497556 | 0.657618         |
| 1112 | 32   | 5      | 4         | 10    | 0.2901        | 0.587087 | 0.654850         |
| 1113 | 8    | 4      | 5         | 500   | 0.5649        | 0.329099 | 0.653772         |
| 1114 | 16   | 3      | 2         | 100   | 0.4427        | 0.479705 | 0.652764         |
| 1115 | 8    | 4      | 6         | 2000  | 0.5725        | 0.311093 | 0.651564         |
| 1116 | 8    | 3      | 4         | 100   | 0.4198        | 0.497834 | 0.651207         |
| 1117 | 64   | 3      | 1         | 10    | 0.2545        | 0.597349 | 0.649305         |
| 1118 | 16   | 4      | 5         | 100   | 0.4453        | 0.469967 | 0.647427         |
| 1119 | 128  | 4      | 1         | 10    | 0.4249        | 0.477556 | 0.639218         |
| 1120 | 8    | 4      | 3         | 2000  | 0.5751        | 0.259646 | 0.630996         |
| 1121 | 8    | 3      | 6         | 100   | 0.3613        | 0.516384 | 0.630230         |
| 1122 | 32   | 5      | 6         | 10    | 0.2621        | 0.573141 | 0.630227         |
| 1123 | 8    | 5      | 5         | 500   | 0.4122        | 0.470285 | 0.625361         |
| 1124 | 8    | 3      | 7         | 100   | 0.514         | 0.337257 | 0.614767         |
| 1125 | 8    | 4      | 7         | 100   | 0.4809        | 0.382774 | 0.614638         |
| 1126 | 32   | 5      | 5         | 100   | 0.5318        | 0.303660 | 0.612389         |
| 1127 | 32   | 3      | 3         | 10    | 0.1908        | 0.579020 | 0.609646         |
| 1128 | 8    | 4      | 6         | 100   | 0.3969        | 0.454182 | 0.603168         |
| 1129 | 8    | 4      | 5         | 100   | 0.2977        | 0.516391 | 0.596057         |
| 1130 | 8    | 3      | 7         | 10    | 0.374         | 0.464017 | 0.595977         |
| 1131 | 16   | 4      | 3         | 10    | 0.3766        | 0.461822 | 0.595909         |
| 1132 | 16   | 4      | 8         | 10    | 0.4122        | 0.424936 | 0.592013         |
| 1133 | 64   | 4      | 8         | 10    | 0.3206        | 0.493056 | 0.588123         |
| 1134 | 128  | 5      | 2         | 10    | 0.3028        | 0.498572 | 0.583320         |
| 1135 | 8    | 3      | 1         | 500   | 0.5064        | 0.287551 | 0.582346         |
| 1136 | 8    | 5      | 10        | 500   | 0.4173        | 0.404748 | 0.581344         |
| 1137 | 8    | 4      | 9         | 100   | 0.1603        | 0.555355 | 0.578027         |
| 1138 | 8    | 3      | 8         | 100   | 0.4071        | 0.407138 | 0.575753         |
| 1139 | 32   | 4      | 1         | 10    | 0.1654        | 0.551295 | 0.575572         |
| 1140 | 64   | 4      | 3         | 10    | 0.3639        | 0.443441 | 0.573640         |
| 1141 | 8    | 4      | 3         | 10    | 0.2723        | 0.503318 | 0.572256         |
| 1142 | 8    | 3      | 5         | 10    | 0.3486        | 0.438430 | 0.560127         |
| 1143 | 32   | 4      | 10        | 10    | 0.4173        | 0.368763 | 0.556889         |
| 1144 | 32   | 4      | 4         | 10    | 0.0382        | 0.547864 | 0.549194         |

**Supplementary Table 4. Continued.**

| No.  | node | layers | replicate | epoch | Test_Accuracy | Test_AUC | Euclidean length |
|------|------|--------|-----------|-------|---------------|----------|------------------|
| 1145 | 128  | 5      | 1         | 10    | 0.4097        | 0.359711 | 0.545203         |
| 1146 | 16   | 5      | 10        | 10    | 0.201         | 0.506536 | 0.544959         |
| 1147 | 64   | 4      | 7         | 10    | 0.4885        | 0.220435 | 0.535933         |
| 1148 | 8    | 3      | 10        | 500   | 0.4148        | 0.335897 | 0.533747         |
| 1149 | 8    | 4      | 1         | 100   | 0.4173        | 0.328866 | 0.531312         |
| 1150 | 64   | 5      | 5         | 10    | 0.486         | 0.199496 | 0.525352         |
| 1151 | 64   | 5      | 3         | 10    | 0.4046        | 0.329818 | 0.521997         |
| 1152 | 32   | 4      | 5         | 100   | 0.4682        | 0.228405 | 0.520942         |
| 1153 | 64   | 3      | 6         | 10    | 0.2137        | 0.474454 | 0.520360         |
| 1154 | 16   | 5      | 5         | 100   | 0.3868        | 0.342022 | 0.516327         |
| 1155 | 8    | 4      | 7         | 1000  | 0.4097        | 0.310148 | 0.513854         |
| 1156 | 16   | 5      | 9         | 10    | 0.3282        | 0.391171 | 0.510617         |
| 1157 | 64   | 3      | 9         | 10    | 0.3537        | 0.368083 | 0.510479         |
| 1158 | 32   | 5      | 5         | 10    | 0.4122        | 0.300766 | 0.510264         |
| 1159 | 16   | 5      | 6         | 10    | 0.1654        | 0.480916 | 0.508564         |
| 1160 | 8    | 5      | 8         | 100   | 0.4631        | 0.189137 | 0.500234         |
| 1161 | 32   | 5      | 8         | 10    | 0.2265        | 0.444982 | 0.499311         |
| 1162 | 64   | 5      | 7         | 10    | 0.3588        | 0.340209 | 0.494449         |
| 1163 | 8    | 3      | 10        | 10    | 0.3104        | 0.376875 | 0.488245         |
| 1164 | 32   | 3      | 10        | 10    | 0.2901        | 0.387468 | 0.484034         |
| 1165 | 64   | 3      | 2         | 10    | 0.3333        | 0.347532 | 0.481526         |
| 1166 | 16   | 5      | 4         | 10    | 0.3206        | 0.357218 | 0.479989         |
| 1167 | 8    | 5      | 2         | 10    | 0.0611        | 0.475413 | 0.479323         |
| 1168 | 64   | 5      | 2         | 10    | 0.2901        | 0.379504 | 0.477683         |
| 1169 | 32   | 5      | 7         | 10    | 0.2392        | 0.412337 | 0.476695         |
| 1170 | 32   | 3      | 7         | 10    | 0.3333        | 0.335399 | 0.472844         |
| 1171 | 64   | 3      | 3         | 10    | 0.1679        | 0.441201 | 0.472068         |
| 1172 | 8    | 4      | 8         | 10    | 0.2799        | 0.380067 | 0.472012         |
| 1173 | 64   | 3      | 10        | 10    | 0.4046        | 0.241976 | 0.471438         |
| 1174 | 8    | 5      | 3         | 100   | 0.4097        | 0.216272 | 0.463279         |
| 1175 | 16   | 4      | 5         | 10    | 0.2748        | 0.368387 | 0.459591         |
| 1176 | 8    | 5      | 9         | 500   | 0.4122        | 0.200403 | 0.458334         |
| 1177 | 16   | 5      | 7         | 10    | 0.1628        | 0.428141 | 0.458049         |
| 1178 | 8    | 5      | 4         | 100   | 0.0916        | 0.443117 | 0.452486         |
| 1179 | 8    | 5      | 1         | 100   | 0.4122        | 0.122124 | 0.429911         |
| 1180 | 8    | 5      | 3         | 1000  | 0.4122        | 0.121302 | 0.429678         |
| 1181 | 8    | 5      | 4         | 10    | 0.3969        | 0.139023 | 0.420544         |
| 1182 | 8    | 5      | 7         | 10    | 0.1807        | 0.373236 | 0.414678         |
| 1183 | 8    | 5      | 6         | 500   | 0.4122        | 0.031467 | 0.413399         |
| 1184 | 8    | 5      | 1         | 10    | 0.1654        | 0.371411 | 0.406575         |
| 1185 | 32   | 4      | 2         | 10    | 0.2417        | 0.317749 | 0.399228         |
| 1186 | 32   | 3      | 6         | 10    | 0.3359        | 0.207337 | 0.394737         |
| 1187 | 8    | 4      | 3         | 100   | 0.3562        | 0.155443 | 0.388640         |
| 1188 | 8    | 4      | 9         | 10    | 0.2443        | 0.296486 | 0.384170         |
| 1189 | 8    | 3      | 4         | 10    | 0.1858        | 0.329125 | 0.377948         |
| 1190 | 8    | 3      | 1         | 10    | 0.1756        | 0.331255 | 0.374920         |
| 1191 | 32   | 3      | 5         | 10    | 0.3486        | 0.080026 | 0.357668         |
| 1192 | 32   | 4      | 6         | 10    | 0.2341        | 0.267991 | 0.355840         |
| 1193 | 8    | 3      | 3         | 10    | 0.2163        | 0.280759 | 0.354417         |
| 1194 | 16   | 3      | 1         | 10    | 0.2087        | 0.286315 | 0.354305         |
| 1195 | 128  | 3      | 4         | 10    | 0.3104        | 0.160661 | 0.349514         |
| 1196 | 128  | 4      | 4         | 10    | 0.3282        | 0.112969 | 0.347098         |

**Supplementary Table 4.** Continued.

| <b>No.</b> | <b>node</b> | <b>layers</b> | <b>replicate</b> | <b>epoch</b> | <b>Test_Accuracy</b> | <b>Test_AUC</b> | <b>Euclidean length</b> |
|------------|-------------|---------------|------------------|--------------|----------------------|-----------------|-------------------------|
| 1197       | 64          | 5             | 10               | 10           | 0.2799               | 0.200312        | 0.344193                |
| 1198       | 8           | 4             | 1                | 10           | 0.1654               | 0.221076        | 0.276101                |
| 1199       | 16          | 4             | 10               | 10           | 0.2163               | 0.162060        | 0.270276                |

**Supplementary Table 5.** Models generated by support vector machine for fucosylation classification.

| No. | Seed | Cost | Gamma | Training_Accuracy | Test_Accuracy | Test_AUC | Euclidean length |
|-----|------|------|-------|-------------------|---------------|----------|------------------|
| 1   | 435  | 8.7  | 1     | 100.00            | 0.987277      | 0.998168 | 1.403943         |
| 2   | 435  | 9.2  | 1     | 100.00            | 0.987277      | 0.998168 | 1.403943         |
| 3   | 435  | 8.8  | 1     | 100.00            | 0.987277      | 0.998161 | 1.403938         |
| 4   | 435  | 9.5  | 1     | 100.00            | 0.987277      | 0.998161 | 1.403938         |
| 5   | 435  | 8.6  | 1     | 100.00            | 0.987277      | 0.998155 | 1.403934         |
| 6   | 435  | 8.5  | 1     | 100.00            | 0.987277      | 0.998142 | 1.403924         |
| 7   | 435  | 8.4  | 1     | 99.77             | 0.987277      | 0.998096 | 1.403892         |
| 8   | 435  | 8.2  | 1     | 99.77             | 0.987277      | 0.998090 | 1.403888         |
| 9   | 435  | 8.1  | 1     | 99.77             | 0.987277      | 0.998058 | 1.403865         |
| 10  | 435  | 8    | 1     | 100.00            | 0.987277      | 0.998019 | 1.403837         |
| 11  | 435  | 9.9  | 1     | 100.00            | 0.987277      | 0.997935 | 1.403777         |
| 12  | 649  | 8.4  | 1     | 100.00            | 0.987277      | 0.997889 | 1.403745         |
| 13  | 649  | 8.5  | 1     | 100.00            | 0.987277      | 0.997889 | 1.403745         |
| 14  | 649  | 8.6  | 1     | 100.00            | 0.987277      | 0.997837 | 1.403708         |
| 15  | 649  | 8.2  | 1     | 100.00            | 0.987277      | 0.997831 | 1.403703         |
| 16  | 649  | 8.1  | 1     | 100.00            | 0.987277      | 0.997818 | 1.403694         |
| 17  | 435  | 10.1 | 1     | 100.00            | 0.987277      | 0.997805 | 1.403685         |
| 18  | 649  | 8    | 1     | 100.00            | 0.987277      | 0.997779 | 1.403667         |
| 19  | 435  | 10.2 | 1     | 100.00            | 0.987277      | 0.997753 | 1.403648         |
| 20  | 649  | 9.3  | 1     | 100.00            | 0.987277      | 0.997727 | 1.403630         |
| 21  | 435  | 10.3 | 1     | 100.00            | 0.987277      | 0.997695 | 1.403607         |
| 22  | 649  | 9.4  | 1     | 100.00            | 0.987277      | 0.997676 | 1.403593         |
| 23  | 435  | 8.3  | 1     | 99.77             | 0.987277      | 0.997591 | 1.403533         |
| 24  | 649  | 9.6  | 1     | 100.00            | 0.987277      | 0.997494 | 1.403464         |
| 25  | 435  | 10.6 | 1     | 100.00            | 0.987277      | 0.997443 | 1.403427         |
| 26  | 649  | 9.7  | 1     | 100.00            | 0.987277      | 0.997410 | 1.403404         |
| 27  | 435  | 10.7 | 1     | 100.00            | 0.987277      | 0.997391 | 1.403390         |
| 28  | 435  | 9.8  | 1     | 100.00            | 0.987277      | 0.997384 | 1.403386         |
| 29  | 183  | 8.7  | 1     | 100.00            | 0.987277      | 0.997332 | 1.403349         |
| 30  | 649  | 9.8  | 1     | 100.00            | 0.987277      | 0.997332 | 1.403349         |
| 31  | 183  | 9.8  | 1     | 100.00            | 0.987277      | 0.997294 | 1.403321         |
| 32  | 649  | 9.9  | 1     | 100.00            | 0.987277      | 0.997287 | 1.403317         |
| 33  | 183  | 9    | 1     | 99.77             | 0.987277      | 0.997287 | 1.403317         |
| 34  | 183  | 8.6  | 1     | 99.77             | 0.987277      | 0.997287 | 1.403317         |
| 35  | 435  | 10.8 | 1     | 100.00            | 0.987277      | 0.997281 | 1.403312         |
| 36  | 183  | 9.1  | 1     | 99.77             | 0.987277      | 0.997268 | 1.403303         |
| 37  | 183  | 9.2  | 1     | 99.77             | 0.987277      | 0.997268 | 1.403303         |
| 38  | 183  | 10   | 1     | 100.00            | 0.987277      | 0.997261 | 1.403298         |
| 39  | 183  | 9.3  | 1     | 99.77             | 0.987277      | 0.997255 | 1.403294         |
| 40  | 183  | 9.6  | 1     | 100.00            | 0.987277      | 0.997248 | 1.403289         |
| 41  | 183  | 9.5  | 1     | 100.00            | 0.987277      | 0.997242 | 1.403285         |
| 42  | 435  | 9.4  | 1     | 100.00            | 0.987277      | 0.997235 | 1.403280         |
| 43  | 183  | 10.1 | 1     | 100.00            | 0.987277      | 0.997235 | 1.403280         |
| 44  | 649  | 10   | 1     | 100.00            | 0.987277      | 0.997196 | 1.403252         |
| 45  | 183  | 10.2 | 1     | 100.00            | 0.987277      | 0.997190 | 1.403248         |
| 46  | 183  | 8.5  | 1     | 99.77             | 0.987277      | 0.997190 | 1.403248         |
| 47  | 435  | 10.9 | 1     | 100.00            | 0.987277      | 0.997151 | 1.403220         |
| 48  | 183  | 10.3 | 1     | 100.00            | 0.987277      | 0.997145 | 1.403216         |
| 49  | 183  | 8.4  | 1     | 99.77             | 0.987277      | 0.997138 | 1.403211         |
| 50  | 649  | 10.1 | 1     | 100.00            | 0.987277      | 0.997073 | 1.403165         |
| 51  | 183  | 10.4 | 1     | 100.00            | 0.987277      | 0.997041 | 1.403142         |
| 52  | 183  | 9.9  | 1     | 100.00            | 0.987277      | 0.997022 | 1.403128         |

**Supplementary Table 5.** Continued.

| No. | Seed | Cost | Gamma | Training_Accuracy | Test_Accuracy | Test_AUC | Euclidean length |
|-----|------|------|-------|-------------------|---------------|----------|------------------|
| 53  | 183  | 10.5 | 1     | 100.00            | 0.987277      | 0.996996 | 1.403110         |
| 54  | 649  | 10.2 | 1     | 100.00            | 0.987277      | 0.996996 | 1.403110         |
| 55  | 435  | 11   | 1     | 100.00            | 0.987277      | 0.996976 | 1.403096         |
| 56  | 649  | 10.3 | 1     | 100.00            | 0.987277      | 0.996931 | 1.403064         |
| 57  | 183  | 10.6 | 1     | 100.00            | 0.987277      | 0.996905 | 1.403045         |
| 58  | 59   | 8.4  | 1     | 100.00            | 0.987277      | 0.996847 | 1.403004         |
| 59  | 183  | 8.2  | 1     | 99.77             | 0.987277      | 0.996827 | 1.402990         |
| 60  | 59   | 8.5  | 1     | 100.00            | 0.987277      | 0.996821 | 1.402986         |
| 61  | 649  | 10.5 | 1     | 100.00            | 0.987277      | 0.996776 | 1.402953         |
| 62  | 59   | 8.6  | 1     | 100.00            | 0.987277      | 0.996769 | 1.402949         |
| 63  | 59   | 8.2  | 1     | 100.00            | 0.987277      | 0.996763 | 1.402944         |
| 64  | 59   | 8.9  | 1     | 100.00            | 0.987277      | 0.996743 | 1.402930         |
| 65  | 59   | 9    | 1     | 100.00            | 0.987277      | 0.996737 | 1.402926         |
| 66  | 59   | 9.1  | 1     | 100.00            | 0.987277      | 0.996737 | 1.402926         |
| 67  | 183  | 10.8 | 1     | 100.00            | 0.987277      | 0.996730 | 1.402921         |
| 68  | 59   | 9.2  | 1     | 100.00            | 0.987277      | 0.996685 | 1.402889         |
| 69  | 649  | 10.6 | 1     | 100.00            | 0.987277      | 0.996679 | 1.402884         |
| 70  | 59   | 9.3  | 1     | 100.00            | 0.987277      | 0.996627 | 1.402848         |
| 71  | 183  | 10.9 | 1     | 100.00            | 0.987277      | 0.996627 | 1.402848         |
| 72  | 59   | 8    | 1     | 100.00            | 0.987277      | 0.996568 | 1.402806         |
| 73  | 183  | 8    | 1     | 99.77             | 0.987277      | 0.996568 | 1.402806         |
| 74  | 59   | 9.4  | 1     | 100.00            | 0.987277      | 0.996562 | 1.402802         |
| 75  | 183  | 8.3  | 1     | 99.77             | 0.987277      | 0.996543 | 1.402788         |
| 76  | 183  | 11   | 1     | 100.00            | 0.987277      | 0.996543 | 1.402788         |
| 77  | 183  | 10.7 | 1     | 100.00            | 0.987277      | 0.996510 | 1.402765         |
| 78  | 59   | 9.5  | 1     | 100.00            | 0.987277      | 0.996445 | 1.402719         |
| 79  | 59   | 9.6  | 1     | 100.00            | 0.987277      | 0.996420 | 1.402700         |
| 80  | 649  | 10.8 | 1     | 100.00            | 0.987277      | 0.996368 | 1.402664         |
| 81  | 59   | 9.7  | 1     | 100.00            | 0.987277      | 0.996342 | 1.402645         |
| 82  | 649  | 10.9 | 1     | 100.00            | 0.987277      | 0.996245 | 1.402576         |
| 83  | 59   | 9.8  | 1     | 100.00            | 0.987277      | 0.996238 | 1.402572         |
| 84  | 68   | 9    | 1     | 100.00            | 0.987277      | 0.996232 | 1.402567         |
| 85  | 68   | 8.4  | 1     | 100.00            | 0.987277      | 0.996232 | 1.402567         |
| 86  | 68   | 8.3  | 1     | 99.77             | 0.987277      | 0.996219 | 1.402558         |
| 87  | 68   | 8.5  | 1     | 100.00            | 0.987277      | 0.996212 | 1.402553         |
| 88  | 68   | 8.7  | 1     | 100.00            | 0.987277      | 0.996212 | 1.402553         |
| 89  | 68   | 8.9  | 1     | 100.00            | 0.987277      | 0.996212 | 1.402553         |
| 90  | 68   | 9.1  | 1     | 100.00            | 0.987277      | 0.996212 | 1.402553         |
| 91  | 68   | 8.8  | 1     | 100.00            | 0.987277      | 0.996199 | 1.402544         |
| 92  | 68   | 9.2  | 1     | 100.00            | 0.987277      | 0.996193 | 1.402539         |
| 93  | 352  | 9.4  | 1     | 100.00            | 0.987277      | 0.996173 | 1.402526         |
| 94  | 68   | 9.3  | 1     | 100.00            | 0.987277      | 0.996173 | 1.402526         |
| 95  | 158  | 8.3  | 1     | 100.00            | 0.987277      | 0.996154 | 1.402512         |
| 96  | 352  | 8.5  | 1     | 100.00            | 0.987277      | 0.996154 | 1.402512         |
| 97  | 352  | 9.3  | 1     | 100.00            | 0.987277      | 0.996148 | 1.402507         |
| 98  | 352  | 8.6  | 1     | 100.00            | 0.987277      | 0.996141 | 1.402503         |
| 99  | 59   | 9.9  | 1     | 100.00            | 0.987277      | 0.996141 | 1.402503         |
| 100 | 352  | 8.3  | 1     | 99.77             | 0.987277      | 0.996141 | 1.402503         |
| 101 | 158  | 8.5  | 1     | 100.00            | 0.987277      | 0.996135 | 1.402498         |
| 102 | 352  | 8.7  | 1     | 100.00            | 0.987277      | 0.996135 | 1.402498         |
| 103 | 352  | 8.8  | 1     | 100.00            | 0.987277      | 0.996135 | 1.402498         |
| 104 | 158  | 8.4  | 1     | 100.00            | 0.987277      | 0.996128 | 1.402493         |



**Supplementary Table 5.** Continued.

| No. | Seed | Cost | Gamma | Training_Accuracy | Test_Accuracy | Test_AUC | Euclidean length |
|-----|------|------|-------|-------------------|---------------|----------|------------------|
| 105 | 352  | 9    | 1     | 100.00            | 0.987277      | 0.996122 | 1.402489         |
| 106 | 435  | 9.1  | 1     | 100.00            | 0.987277      | 0.996122 | 1.402489         |
| 107 | 158  | 8.6  | 1     | 100.00            | 0.987277      | 0.996115 | 1.402484         |
| 108 | 649  | 11   | 1     | 100.00            | 0.987277      | 0.996115 | 1.402484         |
| 109 | 352  | 8.9  | 1     | 100.00            | 0.987277      | 0.996109 | 1.402480         |
| 110 | 352  | 9.1  | 1     | 100.00            | 0.987277      | 0.996109 | 1.402480         |
| 111 | 352  | 8.2  | 1     | 99.77             | 0.987277      | 0.996102 | 1.402475         |
| 112 | 158  | 8.2  | 1     | 100.00            | 0.987277      | 0.996089 | 1.402466         |
| 113 | 158  | 8.7  | 1     | 100.00            | 0.987277      | 0.996070 | 1.402452         |
| 114 | 158  | 9.3  | 1     | 100.00            | 0.987277      | 0.996070 | 1.402452         |
| 115 | 352  | 9.5  | 1     | 100.00            | 0.987277      | 0.996063 | 1.402447         |
| 116 | 68   | 9.4  | 1     | 100.00            | 0.987277      | 0.996057 | 1.402443         |
| 117 | 68   | 8.2  | 1     | 99.77             | 0.987277      | 0.996057 | 1.402443         |
| 118 | 158  | 9.2  | 1     | 100.00            | 0.987277      | 0.996044 | 1.402434         |
| 119 | 59   | 10   | 1     | 100.00            | 0.987277      | 0.996044 | 1.402434         |
| 120 | 158  | 8.8  | 1     | 100.00            | 0.987277      | 0.996038 | 1.402429         |
| 121 | 158  | 9    | 1     | 100.00            | 0.987277      | 0.996031 | 1.402424         |
| 122 | 158  | 8.9  | 1     | 100.00            | 0.987277      | 0.996031 | 1.402424         |
| 123 | 158  | 9.1  | 1     | 100.00            | 0.987277      | 0.996018 | 1.402415         |
| 124 | 352  | 8.1  | 1     | 99.77             | 0.987277      | 0.995992 | 1.402397         |
| 125 | 59   | 10.1 | 1     | 100.00            | 0.987277      | 0.995973 | 1.402383         |
| 126 | 158  | 8.1  | 1     | 100.00            | 0.987277      | 0.995966 | 1.402378         |
| 127 | 649  | 10.7 | 1     | 100.00            | 0.987277      | 0.995960 | 1.402374         |
| 128 | 68   | 9.5  | 1     | 100.00            | 0.987277      | 0.995947 | 1.402365         |
| 129 | 352  | 9.8  | 1     | 100.00            | 0.987277      | 0.995927 | 1.402351         |
| 130 | 158  | 8    | 1     | 100.00            | 0.987277      | 0.995915 | 1.402342         |
| 131 | 932  | 8.4  | 1     | 100.00            | 0.987277      | 0.995895 | 1.402328         |
| 132 | 158  | 9.4  | 1     | 100.00            | 0.987277      | 0.995889 | 1.402323         |
| 133 | 932  | 8.3  | 1     | 100.00            | 0.987277      | 0.995876 | 1.402314         |
| 134 | 932  | 8.5  | 1     | 100.00            | 0.987277      | 0.995850 | 1.402296         |
| 135 | 435  | 9.7  | 1     | 100.00            | 0.987277      | 0.995850 | 1.402296         |
| 136 | 649  | 9.1  | 1     | 100.00            | 0.987277      | 0.995850 | 1.402296         |
| 137 | 352  | 8    | 1     | 100.00            | 0.987277      | 0.995843 | 1.402291         |
| 138 | 68   | 9.6  | 1     | 100.00            | 0.987277      | 0.995837 | 1.402287         |
| 139 | 352  | 9.9  | 1     | 100.00            | 0.987277      | 0.995817 | 1.402273         |
| 140 | 352  | 10   | 1     | 100.00            | 0.987277      | 0.995779 | 1.402245         |
| 141 | 158  | 9.5  | 1     | 100.00            | 0.987277      | 0.995766 | 1.402236         |
| 142 | 68   | 9.7  | 1     | 100.00            | 0.987277      | 0.995753 | 1.402227         |
| 143 | 649  | 9.2  | 1     | 100.00            | 0.987277      | 0.995746 | 1.402222         |
| 144 | 352  | 10.1 | 1     | 100.00            | 0.987277      | 0.995733 | 1.402213         |
| 145 | 932  | 8.6  | 1     | 100.00            | 0.987277      | 0.995720 | 1.402204         |
| 146 | 932  | 8.2  | 1     | 100.00            | 0.987277      | 0.995707 | 1.402195         |
| 147 | 932  | 9.1  | 1     | 100.00            | 0.987277      | 0.995688 | 1.402181         |
| 148 | 352  | 10.2 | 1     | 100.00            | 0.987277      | 0.995681 | 1.402176         |
| 149 | 932  | 8.8  | 1     | 100.00            | 0.987277      | 0.995681 | 1.402176         |
| 150 | 961  | 9.1  | 1     | 100.00            | 0.987277      | 0.995675 | 1.402172         |
| 151 | 932  | 9    | 1     | 100.00            | 0.987277      | 0.995675 | 1.402172         |
| 152 | 932  | 9.2  | 1     | 100.00            | 0.987277      | 0.995675 | 1.402172         |
| 153 | 961  | 9    | 1     | 100.00            | 0.987277      | 0.995662 | 1.402162         |
| 154 | 961  | 8.8  | 1     | 100.00            | 0.987277      | 0.995662 | 1.402162         |
| 155 | 961  | 9.2  | 1     | 100.00            | 0.987277      | 0.995662 | 1.402162         |
| 156 | 435  | 9    | 1     | 100.00            | 0.987277      | 0.995662 | 1.402162         |

**Supplementary Table 5. Continued.**

| No. | Seed | Cost | Gamma | Training_Accuracy | Test_Accuracy | Test_AUC | Euclidean length |
|-----|------|------|-------|-------------------|---------------|----------|------------------|
| 157 | 932  | 8.7  | 1     | 100.00            | 0.987277      | 0.995656 | 1.402158         |
| 158 | 435  | 9.3  | 1     | 100.00            | 0.987277      | 0.995656 | 1.402158         |
| 159 | 961  | 8.6  | 1     | 100.00            | 0.987277      | 0.995649 | 1.402153         |
| 160 | 961  | 8.7  | 1     | 100.00            | 0.987277      | 0.995649 | 1.402153         |
| 161 | 961  | 8.5  | 1     | 100.00            | 0.987277      | 0.995630 | 1.402139         |
| 162 | 961  | 8.4  | 1     | 100.00            | 0.987277      | 0.995623 | 1.402135         |
| 163 | 158  | 9.6  | 1     | 100.00            | 0.987277      | 0.995623 | 1.402135         |
| 164 | 435  | 8.9  | 1     | 100.00            | 0.987277      | 0.995623 | 1.402135         |
| 165 | 686  | 8.4  | 1     | 100.00            | 0.987277      | 0.995617 | 1.402130         |
| 166 | 59   | 10.4 | 1     | 100.00            | 0.987277      | 0.995610 | 1.402126         |
| 167 | 352  | 10.3 | 1     | 100.00            | 0.987277      | 0.995584 | 1.402107         |
| 168 | 686  | 8.3  | 1     | 99.77             | 0.987277      | 0.995584 | 1.402107         |
| 169 | 961  | 9.3  | 1     | 100.00            | 0.987277      | 0.995578 | 1.402103         |
| 170 | 435  | 9.6  | 1     | 100.00            | 0.987277      | 0.995571 | 1.402098         |
| 171 | 961  | 8.3  | 1     | 100.00            | 0.987277      | 0.995565 | 1.402093         |
| 172 | 686  | 8.6  | 1     | 100.00            | 0.987277      | 0.995565 | 1.402093         |
| 173 | 435  | 10   | 1     | 100.00            | 0.987277      | 0.995558 | 1.402089         |
| 174 | 961  | 8.2  | 1     | 100.00            | 0.987277      | 0.995545 | 1.402080         |
| 175 | 158  | 9.7  | 1     | 100.00            | 0.987277      | 0.995539 | 1.402075         |
| 176 | 686  | 9    | 1     | 100.00            | 0.987277      | 0.995533 | 1.402070         |
| 177 | 686  | 8.8  | 1     | 100.00            | 0.987277      | 0.995533 | 1.402070         |
| 178 | 686  | 8.7  | 1     | 100.00            | 0.987277      | 0.995526 | 1.402066         |
| 179 | 686  | 8.9  | 1     | 100.00            | 0.987277      | 0.995526 | 1.402066         |
| 180 | 686  | 9.2  | 1     | 100.00            | 0.987277      | 0.995513 | 1.402057         |
| 181 | 961  | 8.1  | 1     | 100.00            | 0.987277      | 0.995507 | 1.402052         |
| 182 | 649  | 9    | 1     | 100.00            | 0.987277      | 0.995507 | 1.402052         |
| 183 | 649  | 8.3  | 1     | 100.00            | 0.987277      | 0.995507 | 1.402052         |
| 184 | 961  | 9.4  | 1     | 100.00            | 0.987277      | 0.995500 | 1.402047         |
| 185 | 68   | 9.9  | 1     | 100.00            | 0.987277      | 0.995500 | 1.402047         |
| 186 | 352  | 10.4 | 1     | 100.00            | 0.987277      | 0.995487 | 1.402038         |
| 187 | 932  | 8.1  | 1     | 100.00            | 0.987277      | 0.995474 | 1.402029         |
| 188 | 686  | 9.3  | 1     | 100.00            | 0.987277      | 0.995474 | 1.402029         |
| 189 | 158  | 9.8  | 1     | 100.00            | 0.987277      | 0.995468 | 1.402024         |
| 190 | 932  | 9.4  | 1     | 100.00            | 0.987277      | 0.995442 | 1.402006         |
| 191 | 158  | 9.9  | 1     | 100.00            | 0.987277      | 0.995422 | 1.401992         |
| 192 | 59   | 10.6 | 1     | 100.00            | 0.987277      | 0.995422 | 1.401992         |
| 193 | 158  | 10   | 1     | 100.00            | 0.987277      | 0.995416 | 1.401988         |
| 194 | 68   | 10   | 1     | 100.00            | 0.987277      | 0.995416 | 1.401988         |
| 195 | 686  | 9.4  | 1     | 100.00            | 0.987277      | 0.995397 | 1.401974         |
| 196 | 158  | 10.1 | 1     | 100.00            | 0.987277      | 0.995384 | 1.401965         |
| 197 | 961  | 8    | 1     | 100.00            | 0.987277      | 0.995364 | 1.401951         |
| 198 | 686  | 8.1  | 1     | 100.00            | 0.987277      | 0.995358 | 1.401946         |
| 199 | 686  | 9.5  | 1     | 100.00            | 0.987277      | 0.995338 | 1.401933         |
| 200 | 961  | 9.5  | 1     | 100.00            | 0.987277      | 0.995319 | 1.401919         |
| 201 | 932  | 9.5  | 1     | 100.00            | 0.987277      | 0.995293 | 1.401900         |
| 202 | 649  | 8.8  | 1     | 100.00            | 0.987277      | 0.995286 | 1.401896         |
| 203 | 686  | 9.6  | 1     | 100.00            | 0.987277      | 0.995280 | 1.401891         |
| 204 | 59   | 10.7 | 1     | 100.00            | 0.987277      | 0.995274 | 1.401887         |
| 205 | 932  | 9.6  | 1     | 100.00            | 0.987277      | 0.995254 | 1.401873         |
| 206 | 158  | 10.2 | 1     | 100.00            | 0.987277      | 0.995241 | 1.401864         |
| 207 | 686  | 9.7  | 1     | 100.00            | 0.987277      | 0.995235 | 1.401859         |
| 208 | 68   | 10.2 | 1     | 100.00            | 0.987277      | 0.995228 | 1.401854         |

**Supplementary Table 5.** Continued.

| No. | Seed | Cost | Gamma | Training_Accuracy | Test_Accuracy | Test_AUC | Euclidean length |
|-----|------|------|-------|-------------------|---------------|----------|------------------|
| 209 | 961  | 9.6  | 1     | 100.00            | 0.987277      | 0.995222 | 1.401850         |
| 210 | 352  | 10.6 | 1     | 100.00            | 0.987277      | 0.995196 | 1.401831         |
| 211 | 183  | 8.9  | 1     | 99.77             | 0.987277      | 0.995176 | 1.401818         |
| 212 | 932  | 9.7  | 1     | 100.00            | 0.987277      | 0.995163 | 1.401808         |
| 213 | 158  | 10.3 | 1     | 100.00            | 0.987277      | 0.995151 | 1.401799         |
| 214 | 932  | 8    | 1     | 100.00            | 0.987277      | 0.995131 | 1.401785         |
| 215 | 932  | 9.8  | 1     | 100.00            | 0.987277      | 0.995125 | 1.401781         |
| 216 | 686  | 9.8  | 1     | 100.00            | 0.987277      | 0.995125 | 1.401781         |
| 217 | 59   | 8.8  | 1     | 100.00            | 0.987277      | 0.995099 | 1.401762         |
| 218 | 961  | 9.8  | 1     | 100.00            | 0.987277      | 0.995092 | 1.401758         |
| 219 | 649  | 9.5  | 1     | 100.00            | 0.987277      | 0.995092 | 1.401758         |
| 220 | 68   | 10.3 | 1     | 100.00            | 0.987277      | 0.995073 | 1.401744         |
| 221 | 59   | 10.8 | 1     | 100.00            | 0.987277      | 0.995066 | 1.401739         |
| 222 | 352  | 10.7 | 1     | 100.00            | 0.987277      | 0.995060 | 1.401735         |
| 223 | 932  | 9.9  | 1     | 100.00            | 0.987277      | 0.995034 | 1.401717         |
| 224 | 158  | 10.4 | 1     | 100.00            | 0.987277      | 0.995034 | 1.401717         |
| 225 | 435  | 10.5 | 1     | 100.00            | 0.987277      | 0.995021 | 1.401707         |
| 226 | 183  | 8.1  | 1     | 99.77             | 0.987277      | 0.995008 | 1.401698         |
| 227 | 686  | 9.9  | 1     | 100.00            | 0.987277      | 0.994982 | 1.401680         |
| 228 | 961  | 9.9  | 1     | 100.00            | 0.987277      | 0.994963 | 1.401666         |
| 229 | 352  | 10.8 | 1     | 100.00            | 0.987277      | 0.994917 | 1.401634         |
| 230 | 158  | 10.5 | 1     | 100.00            | 0.987277      | 0.994917 | 1.401634         |
| 231 | 932  | 10   | 1     | 100.00            | 0.987277      | 0.994904 | 1.401625         |
| 232 | 183  | 8.8  | 1     | 99.77             | 0.987277      | 0.994898 | 1.401620         |
| 233 | 686  | 10   | 1     | 100.00            | 0.987277      | 0.994885 | 1.401611         |
| 234 | 68   | 10.4 | 1     | 100.00            | 0.987277      | 0.994853 | 1.401588         |
| 235 | 961  | 10   | 1     | 100.00            | 0.987277      | 0.994846 | 1.401583         |
| 236 | 59   | 10.9 | 1     | 100.00            | 0.987277      | 0.994846 | 1.401583         |
| 237 | 932  | 10.1 | 1     | 100.00            | 0.987277      | 0.994814 | 1.401560         |
| 238 | 352  | 10.9 | 1     | 100.00            | 0.987277      | 0.994801 | 1.401551         |
| 239 | 686  | 10.1 | 1     | 100.00            | 0.987277      | 0.994801 | 1.401551         |
| 240 | 352  | 10.5 | 1     | 100.00            | 0.987277      | 0.994788 | 1.401542         |
| 241 | 183  | 9.7  | 1     | 100.00            | 0.987277      | 0.994743 | 1.401510         |
| 242 | 686  | 10.3 | 1     | 100.00            | 0.987277      | 0.994717 | 1.401491         |
| 243 | 68   | 10.5 | 1     | 100.00            | 0.987277      | 0.994710 | 1.401487         |
| 244 | 961  | 10.1 | 1     | 100.00            | 0.987277      | 0.994704 | 1.401482         |
| 245 | 158  | 10.6 | 1     | 100.00            | 0.987277      | 0.994704 | 1.401482         |
| 246 | 932  | 10.2 | 1     | 100.00            | 0.987277      | 0.994697 | 1.401478         |
| 247 | 932  | 10.3 | 1     | 100.00            | 0.987277      | 0.994665 | 1.401455         |
| 248 | 59   | 11   | 1     | 100.00            | 0.987277      | 0.994652 | 1.401445         |
| 249 | 352  | 11   | 1     | 100.00            | 0.987277      | 0.994645 | 1.401441         |
| 250 | 686  | 10.4 | 1     | 100.00            | 0.987277      | 0.994620 | 1.401422         |
| 251 | 961  | 10.2 | 1     | 100.00            | 0.987277      | 0.994607 | 1.401413         |
| 252 | 932  | 10.4 | 1     | 100.00            | 0.987277      | 0.994594 | 1.401404         |
| 253 | 435  | 13   | 1     | 100.00            | 0.984733      | 0.997061 | 1.401367         |
| 254 | 68   | 10.6 | 1     | 100.00            | 0.987277      | 0.994490 | 1.401330         |
| 255 | 961  | 10.3 | 1     | 100.00            | 0.987277      | 0.994484 | 1.401326         |
| 256 | 158  | 10.7 | 1     | 100.00            | 0.987277      | 0.994471 | 1.401317         |
| 257 | 686  | 10.5 | 1     | 100.00            | 0.987277      | 0.994471 | 1.401317         |
| 258 | 59   | 8.3  | 1     | 100.00            | 0.987277      | 0.994464 | 1.401312         |
| 259 | 435  | 2    | 1     | 99.54             | 0.984733      | 0.996976 | 1.401307         |
| 260 | 932  | 10.5 | 1     | 100.00            | 0.987277      | 0.994438 | 1.401294         |

**Supplementary Table 5.** Continued.

| No. | Seed | Cost | Gamma | Training_Accuracy | Test_Accuracy | Test_AUC | Euclidean length |
|-----|------|------|-------|-------------------|---------------|----------|------------------|
| 261 | 435  | 15   | 1     | 100.00            | 0.984733      | 0.996912 | 1.401261         |
| 262 | 649  | 10.4 | 1     | 100.00            | 0.987277      | 0.994341 | 1.401225         |
| 263 | 183  | 13   | 1     | 100.00            | 0.984733      | 0.996860 | 1.401224         |
| 264 | 961  | 10.4 | 1     | 100.00            | 0.987277      | 0.994335 | 1.401220         |
| 265 | 68   | 10.7 | 1     | 100.00            | 0.987277      | 0.994335 | 1.401220         |
| 266 | 932  | 10.6 | 1     | 100.00            | 0.987277      | 0.994328 | 1.401216         |
| 267 | 435  | 12   | 1     | 100.00            | 0.984733      | 0.996827 | 1.401201         |
| 268 | 435  | 16   | 1     | 100.00            | 0.984733      | 0.996827 | 1.401201         |
| 269 | 158  | 10.8 | 1     | 100.00            | 0.987277      | 0.994302 | 1.401197         |
| 270 | 59   | 8.7  | 1     | 100.00            | 0.987277      | 0.994276 | 1.401179         |
| 271 | 183  | 9.4  | 1     | 100.00            | 0.987277      | 0.994192 | 1.401119         |
| 272 | 649  | 14   | 1     | 100.00            | 0.984733      | 0.996711 | 1.401118         |
| 273 | 961  | 10.5 | 1     | 100.00            | 0.987277      | 0.994186 | 1.401115         |
| 274 | 59   | 10.2 | 1     | 100.00            | 0.987277      | 0.994173 | 1.401105         |
| 275 | 59   | 8.1  | 1     | 100.00            | 0.987277      | 0.994160 | 1.401096         |
| 276 | 961  | 10.6 | 1     | 100.00            | 0.987277      | 0.994121 | 1.401069         |
| 277 | 68   | 10.8 | 1     | 100.00            | 0.987277      | 0.994121 | 1.401069         |
| 278 | 932  | 10.7 | 1     | 100.00            | 0.987277      | 0.994108 | 1.401059         |
| 279 | 435  | 4    | 1     | 100.00            | 0.984733      | 0.996614 | 1.401049         |
| 280 | 961  | 9.7  | 1     | 100.00            | 0.987277      | 0.994056 | 1.401023         |
| 281 | 961  | 10.7 | 1     | 100.00            | 0.987277      | 0.994011 | 1.400990         |
| 282 | 158  | 10.9 | 1     | 100.00            | 0.987277      | 0.993992 | 1.400977         |
| 283 | 649  | 15   | 1     | 100.00            | 0.984733      | 0.996497 | 1.400966         |
| 284 | 183  | 15   | 1     | 100.00            | 0.984733      | 0.996471 | 1.400947         |
| 285 | 686  | 8.2  | 1     | 99.77             | 0.987277      | 0.993933 | 1.400935         |
| 286 | 68   | 9.8  | 1     | 100.00            | 0.987277      | 0.993875 | 1.400894         |
| 287 | 158  | 11   | 1     | 100.00            | 0.987277      | 0.993862 | 1.400885         |
| 288 | 961  | 10.8 | 1     | 100.00            | 0.987277      | 0.993849 | 1.400876         |
| 289 | 183  | 4    | 1     | 100.00            | 0.984733      | 0.996368 | 1.400874         |
| 290 | 59   | 10.3 | 1     | 100.00            | 0.987277      | 0.993817 | 1.400853         |
| 291 | 649  | 16   | 1     | 100.00            | 0.984733      | 0.996335 | 1.400851         |
| 292 | 183  | 16   | 1     | 100.00            | 0.984733      | 0.996322 | 1.400842         |
| 293 | 649  | 13   | 1     | 100.00            | 0.984733      | 0.996309 | 1.400832         |
| 294 | 68   | 11   | 1     | 100.00            | 0.987277      | 0.993784 | 1.400830         |
| 295 | 68   | 8.6  | 1     | 100.00            | 0.987277      | 0.993707 | 1.400775         |
| 296 | 352  | 9.2  | 1     | 100.00            | 0.987277      | 0.993700 | 1.400770         |
| 297 | 686  | 9.1  | 1     | 100.00            | 0.987277      | 0.993700 | 1.400770         |
| 298 | 961  | 10.9 | 1     | 100.00            | 0.987277      | 0.993674 | 1.400752         |
| 299 | 649  | 12   | 1     | 100.00            | 0.984733      | 0.996186 | 1.400745         |
| 300 | 352  | 8.4  | 1     | 99.77             | 0.987277      | 0.993661 | 1.400742         |
| 301 | 183  | 12   | 1     | 100.00            | 0.984733      | 0.996180 | 1.400740         |
| 302 | 932  | 11   | 1     | 100.00            | 0.987277      | 0.993635 | 1.400724         |
| 303 | 686  | 10.9 | 1     | 100.00            | 0.987277      | 0.993597 | 1.400697         |
| 304 | 961  | 11   | 1     | 100.00            | 0.987277      | 0.993525 | 1.400646         |
| 305 | 686  | 10.2 | 1     | 100.00            | 0.987277      | 0.993499 | 1.400628         |
| 306 | 352  | 9.7  | 1     | 100.00            | 0.987277      | 0.993474 | 1.400609         |
| 307 | 68   | 8    | 1     | 100.00            | 0.987277      | 0.993467 | 1.400605         |
| 308 | 352  | 9.6  | 1     | 100.00            | 0.987277      | 0.993461 | 1.400600         |
| 309 | 183  | 32   | 1     | 100.00            | 0.984733      | 0.995947 | 1.400574         |
| 310 | 932  | 10.9 | 1     | 100.00            | 0.987277      | 0.993389 | 1.400550         |
| 311 | 932  | 8.9  | 1     | 100.00            | 0.987277      | 0.993299 | 1.400485         |
| 312 | 961  | 8.9  | 1     | 100.00            | 0.987277      | 0.993266 | 1.400462         |

**Supplementary Table 5. Continued.**

| No. | Seed | Cost | Gamma | Training_Accuracy | Test_Accuracy | Test_AUC | Euclidean length |
|-----|------|------|-------|-------------------|---------------|----------|------------------|
| 313 | 435  | 10.4 | 1     | 100.00            | 0.987277      | 0.993202 | 1.400416         |
| 314 | 68   | 8.1  | 1     | 100.00            | 0.987277      | 0.993169 | 1.400393         |
| 315 | 59   | 2    | 1     | 99.54             | 0.984733      | 0.995649 | 1.400363         |
| 316 | 686  | 8.5  | 1     | 100.00            | 0.987277      | 0.993111 | 1.400352         |
| 317 | 932  | 9.3  | 1     | 100.00            | 0.987277      | 0.993085 | 1.400334         |
| 318 | 59   | 14   | 1     | 100.00            | 0.984733      | 0.995584 | 1.400317         |
| 319 | 59   | 15   | 1     | 100.00            | 0.984733      | 0.995571 | 1.400307         |
| 320 | 686  | 11   | 1     | 100.00            | 0.987277      | 0.993033 | 1.400297         |
| 321 | 59   | 16   | 1     | 100.00            | 0.984733      | 0.995422 | 1.400202         |
| 322 | 649  | 8.9  | 1     | 100.00            | 0.987277      | 0.992833 | 1.400155         |
| 323 | 68   | 10.1 | 1     | 100.00            | 0.987277      | 0.992807 | 1.400136         |
| 324 | 649  | 32   | 1     | 100.00            | 0.984733      | 0.995306 | 1.400119         |
| 325 | 352  | 2    | 1     | 99.77             | 0.984733      | 0.995261 | 1.400087         |
| 326 | 59   | 13   | 1     | 100.00            | 0.984733      | 0.995254 | 1.400082         |
| 327 | 435  | 32   | 1     | 100.00            | 0.984733      | 0.995248 | 1.400077         |
| 328 | 649  | 8.7  | 1     | 100.00            | 0.987277      | 0.992723 | 1.400077         |
| 329 | 158  | 2    | 1     | 99.54             | 0.984733      | 0.995138 | 1.399999         |
| 330 | 59   | 12   | 1     | 100.00            | 0.984733      | 0.995118 | 1.399985         |
| 331 | 59   | 4    | 1     | 100.00            | 0.984733      | 0.995040 | 1.399930         |
| 332 | 686  | 10.6 | 1     | 100.00            | 0.987277      | 0.992444 | 1.399879         |
| 333 | 932  | 10.8 | 1     | 100.00            | 0.987277      | 0.992282 | 1.399764         |
| 334 | 686  | 10.7 | 1     | 100.00            | 0.987277      | 0.992230 | 1.399728         |
| 335 | 649  | 4    | 1     | 100.00            | 0.984733      | 0.994756 | 1.399728         |
| 336 | 352  | 14   | 1     | 100.00            | 0.984733      | 0.994743 | 1.399718         |
| 337 | 435  | 14   | 1     | 100.00            | 0.984733      | 0.994730 | 1.399709         |
| 338 | 158  | 15   | 1     | 100.00            | 0.984733      | 0.994723 | 1.399705         |
| 339 | 59   | 32   | 1     | 100.00            | 0.984733      | 0.994717 | 1.399700         |
| 340 | 158  | 14   | 1     | 100.00            | 0.984733      | 0.994665 | 1.399663         |
| 341 | 649  | 7    | 1     | 100.00            | 0.984733      | 0.994620 | 1.399631         |
| 342 | 158  | 12   | 1     | 100.00            | 0.984733      | 0.994568 | 1.399594         |
| 343 | 352  | 32   | 1     | 100.00            | 0.984733      | 0.994412 | 1.399484         |
| 344 | 932  | 13   | 1     | 100.00            | 0.984733      | 0.994393 | 1.399470         |
| 345 | 183  | 14   | 1     | 100.00            | 0.984733      | 0.994380 | 1.399461         |
| 346 | 686  | 15   | 1     | 100.00            | 0.984733      | 0.994309 | 1.399410         |
| 347 | 352  | 15   | 1     | 100.00            | 0.984733      | 0.994238 | 1.399360         |
| 348 | 352  | 12   | 1     | 100.00            | 0.984733      | 0.994231 | 1.399355         |
| 349 | 158  | 13   | 1     | 100.00            | 0.984733      | 0.994225 | 1.399350         |
| 350 | 68   | 14   | 1     | 100.00            | 0.984733      | 0.994192 | 1.399327         |
| 351 | 352  | 16   | 1     | 100.00            | 0.984733      | 0.994160 | 1.399304         |
| 352 | 932  | 16   | 1     | 100.00            | 0.987277      | 0.991609 | 1.399287         |
| 353 | 686  | 16   | 1     | 100.00            | 0.984733      | 0.994056 | 1.399231         |
| 354 | 68   | 10.9 | 1     | 100.00            | 0.987277      | 0.991525 | 1.399228         |
| 355 | 961  | 13   | 1     | 100.00            | 0.984733      | 0.993998 | 1.399189         |
| 356 | 686  | 8    | 1     | 100.00            | 0.987277      | 0.991466 | 1.399186         |
| 357 | 686  | 12   | 1     | 100.00            | 0.984733      | 0.993959 | 1.399162         |
| 358 | 932  | 14   | 1     | 100.00            | 0.984733      | 0.993953 | 1.399157         |
| 359 | 961  | 14   | 1     | 100.00            | 0.984733      | 0.993894 | 1.399116         |
| 360 | 183  | 7    | 1     | 100.00            | 0.984733      | 0.993869 | 1.399097         |
| 361 | 352  | 4    | 1     | 100.00            | 0.984733      | 0.993862 | 1.399093         |
| 362 | 158  | 4    | 1     | 100.00            | 0.984733      | 0.993843 | 1.399079         |
| 363 | 686  | 10.8 | 1     | 100.00            | 0.987277      | 0.991285 | 1.399058         |
| 364 | 158  | 16   | 1     | 100.00            | 0.984733      | 0.993739 | 1.399005         |

**Supplementary Table 5.** Continued.

| No. | Seed | Cost  | Gamma | Training_Accuracy | Test_Accuracy | Test_AUC | Euclidean length |
|-----|------|-------|-------|-------------------|---------------|----------|------------------|
| 365 | 183  | 2     | 1     | 99.54             | 0.984733      | 0.993733 | 1.399001         |
| 366 | 435  | 128   | 1     | 100.00            | 0.982188      | 0.996050 | 1.398860         |
| 367 | 435  | 2048  | 1     | 100.00            | 0.982188      | 0.996050 | 1.398860         |
| 368 | 435  | 32768 | 1     | 100.00            | 0.982188      | 0.996050 | 1.398860         |
| 369 | 435  | 512   | 1     | 100.00            | 0.982188      | 0.996050 | 1.398860         |
| 370 | 435  | 8192  | 1     | 100.00            | 0.982188      | 0.996050 | 1.398860         |
| 371 | 435  | 64    | 1     | 100.00            | 0.982188      | 0.996050 | 1.398860         |
| 372 | 68   | 15    | 1     | 100.00            | 0.984733      | 0.993519 | 1.398849         |
| 373 | 649  | 2     | 1     | 99.54             | 0.984733      | 0.993467 | 1.398812         |
| 374 | 68   | 16    | 1     | 100.00            | 0.984733      | 0.993409 | 1.398771         |
| 375 | 961  | 15    | 1     | 100.00            | 0.984733      | 0.993383 | 1.398752         |
| 376 | 961  | 12    | 1     | 100.00            | 0.984733      | 0.993292 | 1.398688         |
| 377 | 435  | 5     | 1     | 100.00            | 0.982188      | 0.995766 | 1.398658         |
| 378 | 183  | 6     | 1     | 100.00            | 0.984733      | 0.993228 | 1.398642         |
| 379 | 686  | 32    | 1     | 100.00            | 0.984733      | 0.993111 | 1.398559         |
| 380 | 932  | 2     | 1     | 99.77             | 0.984733      | 0.993046 | 1.398513         |
| 381 | 961  | 4     | 1     | 100.00            | 0.984733      | 0.992975 | 1.398463         |
| 382 | 59   | 10.5  | 1     | 100.00            | 0.987277      | 0.990430 | 1.398452         |
| 383 | 183  | 128   | 1     | 100.00            | 0.982188      | 0.995429 | 1.398418         |
| 384 | 183  | 2048  | 1     | 100.00            | 0.982188      | 0.995429 | 1.398418         |
| 385 | 183  | 32768 | 1     | 100.00            | 0.982188      | 0.995429 | 1.398418         |
| 386 | 183  | 512   | 1     | 100.00            | 0.982188      | 0.995429 | 1.398418         |
| 387 | 183  | 8192  | 1     | 100.00            | 0.982188      | 0.995429 | 1.398418         |
| 388 | 183  | 64    | 1     | 100.00            | 0.982188      | 0.995429 | 1.398418         |
| 389 | 961  | 32    | 1     | 100.00            | 0.984733      | 0.992839 | 1.398366         |
| 390 | 932  | 12    | 1     | 100.00            | 0.984733      | 0.992807 | 1.398343         |
| 391 | 686  | 13    | 1     | 100.00            | 0.984733      | 0.992787 | 1.398329         |
| 392 | 686  | 2     | 1     | 99.54             | 0.984733      | 0.992625 | 1.398215         |
| 393 | 932  | 4     | 1     | 100.00            | 0.984733      | 0.992606 | 1.398201         |
| 394 | 686  | 7     | 1     | 100.00            | 0.984733      | 0.992554 | 1.398164         |
| 395 | 68   | 4     | 1     | 100.00            | 0.984733      | 0.992515 | 1.398136         |
| 396 | 352  | 13    | 1     | 100.00            | 0.984733      | 0.992431 | 1.398077         |
| 397 | 686  | 14    | 1     | 100.00            | 0.984733      | 0.992379 | 1.398040         |
| 398 | 435  | 7     | 1     | 100.00            | 0.982188      | 0.994620 | 1.397842         |
| 399 | 68   | 12    | 1     | 100.00            | 0.984733      | 0.992043 | 1.397801         |
| 400 | 68   | 2     | 1     | 99.77             | 0.984733      | 0.991971 | 1.397750         |
| 401 | 649  | 5     | 1     | 100.00            | 0.982188      | 0.994458 | 1.397727         |
| 402 | 68   | 13    | 1     | 100.00            | 0.984733      | 0.991894 | 1.397695         |
| 403 | 649  | 6     | 1     | 100.00            | 0.984733      | 0.991887 | 1.397691         |
| 404 | 352  | 7     | 1     | 100.00            | 0.984733      | 0.991829 | 1.397649         |
| 405 | 686  | 4     | 1     | 100.00            | 0.984733      | 0.991823 | 1.397645         |
| 406 | 649  | 128   | 1     | 100.00            | 0.982188      | 0.994231 | 1.397566         |
| 407 | 649  | 2048  | 1     | 100.00            | 0.982188      | 0.994231 | 1.397566         |
| 408 | 649  | 32768 | 1     | 100.00            | 0.982188      | 0.994231 | 1.397566         |
| 409 | 649  | 512   | 1     | 100.00            | 0.982188      | 0.994231 | 1.397566         |
| 410 | 649  | 8192  | 1     | 100.00            | 0.982188      | 0.994231 | 1.397566         |
| 411 | 649  | 64    | 1     | 100.00            | 0.982188      | 0.994231 | 1.397566         |
| 412 | 59   | 5     | 1     | 100.00            | 0.982188      | 0.994212 | 1.397552         |
| 413 | 932  | 128   | 1     | 100.00            | 0.984733      | 0.991648 | 1.397521         |
| 414 | 932  | 2048  | 1     | 100.00            | 0.984733      | 0.991648 | 1.397521         |
| 415 | 932  | 32768 | 1     | 100.00            | 0.984733      | 0.991648 | 1.397521         |
| 416 | 932  | 512   | 1     | 100.00            | 0.984733      | 0.991648 | 1.397521         |

**Supplementary Table 5.** Continued.

| No. | Seed | Cost  | Gamma | Training_Accuracy | Test_Accuracy | Test_AUC | Euclidean length |
|-----|------|-------|-------|-------------------|---------------|----------|------------------|
| 417 | 932  | 8192  | 1     | 100.00            | 0.984733      | 0.991648 | 1.397521         |
| 418 | 932  | 64    | 1     | 100.00            | 0.984733      | 0.991648 | 1.397521         |
| 419 | 59   | 6     | 1     | 100.00            | 0.982188      | 0.994017 | 1.397414         |
| 420 | 932  | 32    | 1     | 100.00            | 0.984733      | 0.991356 | 1.397314         |
| 421 | 59   | 1     | 1     | 99.31             | 0.982188      | 0.993843 | 1.397289         |
| 422 | 961  | 16    | 1     | 100.00            | 0.984733      | 0.991220 | 1.397217         |
| 423 | 183  | 5     | 1     | 100.00            | 0.982188      | 0.993713 | 1.397197         |
| 424 | 686  | 5     | 1     | 100.00            | 0.982188      | 0.993687 | 1.397179         |
| 425 | 158  | 32    | 1     | 100.00            | 0.982188      | 0.993584 | 1.397105         |
| 426 | 435  | 1     | 1     | 99.31             | 0.982188      | 0.993525 | 1.397064         |
| 427 | 932  | 15    | 1     | 100.00            | 0.984733      | 0.990987 | 1.397052         |
| 428 | 435  | 6     | 1     | 100.00            | 0.982188      | 0.993435 | 1.396999         |
| 429 | 68   | 32    | 1     | 100.00            | 0.984733      | 0.990851 | 1.396956         |
| 430 | 158  | 5     | 1     | 100.00            | 0.982188      | 0.993318 | 1.396916         |
| 431 | 686  | 6     | 1     | 100.00            | 0.982188      | 0.993318 | 1.396916         |
| 432 | 158  | 6     | 1     | 100.00            | 0.982188      | 0.993228 | 1.396852         |
| 433 | 68   | 1     | 1     | 99.31             | 0.982188      | 0.993143 | 1.396792         |
| 434 | 59   | 7     | 1     | 100.00            | 0.982188      | 0.993066 | 1.396737         |
| 435 | 59   | 128   | 1     | 100.00            | 0.982188      | 0.992949 | 1.396654         |
| 436 | 59   | 2048  | 1     | 100.00            | 0.982188      | 0.992949 | 1.396654         |
| 437 | 59   | 32768 | 1     | 100.00            | 0.982188      | 0.992949 | 1.396654         |
| 438 | 59   | 512   | 1     | 100.00            | 0.982188      | 0.992949 | 1.396654         |
| 439 | 59   | 8192  | 1     | 100.00            | 0.982188      | 0.992949 | 1.396654         |
| 440 | 59   | 64    | 1     | 100.00            | 0.982188      | 0.992949 | 1.396654         |
| 441 | 158  | 128   | 1     | 100.00            | 0.982188      | 0.992949 | 1.396654         |
| 442 | 158  | 2048  | 1     | 100.00            | 0.982188      | 0.992949 | 1.396654         |
| 443 | 158  | 32768 | 1     | 100.00            | 0.982188      | 0.992949 | 1.396654         |
| 444 | 158  | 512   | 1     | 100.00            | 0.982188      | 0.992949 | 1.396654         |
| 445 | 158  | 8192  | 1     | 100.00            | 0.982188      | 0.992949 | 1.396654         |
| 446 | 158  | 64    | 1     | 100.00            | 0.982188      | 0.992949 | 1.396654         |
| 447 | 352  | 5     | 1     | 100.00            | 0.982188      | 0.992794 | 1.396543         |
| 448 | 961  | 5     | 1     | 100.00            | 0.982188      | 0.992742 | 1.396507         |
| 449 | 158  | 7     | 1     | 100.00            | 0.984733      | 0.990210 | 1.396501         |
| 450 | 961  | 6     | 1     | 100.00            | 0.982188      | 0.992703 | 1.396479         |
| 451 | 961  | 2     | 1     | 99.54             | 0.984733      | 0.990172 | 1.396474         |
| 452 | 68   | 5     | 1     | 100.00            | 0.982188      | 0.992658 | 1.396447         |
| 453 | 352  | 6     | 1     | 100.00            | 0.982188      | 0.992651 | 1.396442         |
| 454 | 932  | 6     | 1     | 100.00            | 0.982188      | 0.992541 | 1.396364         |
| 455 | 961  | 128   | 1     | 100.00            | 0.982188      | 0.992502 | 1.396336         |
| 456 | 961  | 2048  | 1     | 100.00            | 0.982188      | 0.992502 | 1.396336         |
| 457 | 961  | 32768 | 1     | 100.00            | 0.982188      | 0.992502 | 1.396336         |
| 458 | 961  | 512   | 1     | 100.00            | 0.982188      | 0.992502 | 1.396336         |
| 459 | 961  | 8192  | 1     | 100.00            | 0.982188      | 0.992502 | 1.396336         |
| 460 | 961  | 64    | 1     | 100.00            | 0.982188      | 0.992502 | 1.396336         |
| 461 | 932  | 5     | 1     | 100.00            | 0.982188      | 0.992470 | 1.396313         |
| 462 | 932  | 7     | 1     | 100.00            | 0.982188      | 0.992431 | 1.396286         |
| 463 | 183  | 1     | 1     | 99.08             | 0.982188      | 0.991920 | 1.395922         |
| 464 | 68   | 7     | 1     | 100.00            | 0.982188      | 0.991887 | 1.395899         |
| 465 | 686  | 128   | 1     | 100.00            | 0.982188      | 0.991842 | 1.395867         |
| 466 | 686  | 2048  | 1     | 100.00            | 0.982188      | 0.991842 | 1.395867         |
| 467 | 686  | 32768 | 1     | 100.00            | 0.982188      | 0.991842 | 1.395867         |
| 468 | 686  | 512   | 1     | 100.00            | 0.982188      | 0.991842 | 1.395867         |

**Supplementary Table 5.** Continued.

| No. | Seed | Cost  | Gamma | Training_Accuracy | Test_Accuracy | Test_AUC | Euclidean length |
|-----|------|-------|-------|-------------------|---------------|----------|------------------|
| 469 | 686  | 8192  | 1     | 100.00            | 0.982188      | 0.991842 | 1.395867         |
| 470 | 686  | 64    | 1     | 100.00            | 0.982188      | 0.991842 | 1.395867         |
| 471 | 352  | 128   | 1     | 100.00            | 0.982188      | 0.991700 | 1.395766         |
| 472 | 352  | 2048  | 1     | 100.00            | 0.982188      | 0.991700 | 1.395766         |
| 473 | 352  | 32768 | 1     | 100.00            | 0.982188      | 0.991700 | 1.395766         |
| 474 | 352  | 512   | 1     | 100.00            | 0.982188      | 0.991700 | 1.395766         |
| 475 | 352  | 8192  | 1     | 100.00            | 0.982188      | 0.991700 | 1.395766         |
| 476 | 352  | 64    | 1     | 100.00            | 0.982188      | 0.991700 | 1.395766         |
| 477 | 158  | 1     | 1     | 99.31             | 0.979644      | 0.994082 | 1.395672         |
| 478 | 10   | 8.1   | 1     | 100.00            | 0.987277      | 0.986274 | 1.395512         |
| 479 | 10   | 8     | 1     | 100.00            | 0.987277      | 0.986125 | 1.395406         |
| 480 | 2    | 9.6   | 1     | 100.00            | 0.984733      | 0.988048 | 1.394969         |
| 481 | 2    | 9.7   | 1     | 100.00            | 0.984733      | 0.988035 | 1.394959         |
| 482 | 2    | 9.8   | 1     | 100.00            | 0.984733      | 0.987977 | 1.394918         |
| 483 | 9    | 8.3   | 1     | 100.00            | 0.987277      | 0.985426 | 1.394912         |
| 484 | 2    | 8.6   | 1     | 99.77             | 0.984733      | 0.987938 | 1.394891         |
| 485 | 2    | 9.9   | 1     | 100.00            | 0.984733      | 0.987821 | 1.394808         |
| 486 | 2    | 8.5   | 1     | 99.77             | 0.984733      | 0.987802 | 1.394794         |
| 487 | 2    | 9.4   | 1     | 100.00            | 0.984733      | 0.987776 | 1.394776         |
| 488 | 9    | 8.4   | 1     | 100.00            | 0.987277      | 0.985231 | 1.394775         |
| 489 | 9    | 8.2   | 1     | 100.00            | 0.987277      | 0.985199 | 1.394752         |
| 490 | 68   | 128   | 1     | 100.00            | 0.982188      | 0.990139 | 1.394657         |
| 491 | 68   | 2048  | 1     | 100.00            | 0.982188      | 0.990139 | 1.394657         |
| 492 | 68   | 32768 | 1     | 100.00            | 0.982188      | 0.990139 | 1.394657         |
| 493 | 68   | 512   | 1     | 100.00            | 0.982188      | 0.990139 | 1.394657         |
| 494 | 68   | 8192  | 1     | 100.00            | 0.982188      | 0.990139 | 1.394657         |
| 495 | 68   | 64    | 1     | 100.00            | 0.982188      | 0.990139 | 1.394657         |
| 496 | 68   | 6     | 1     | 100.00            | 0.982188      | 0.990139 | 1.394657         |
| 497 | 10   | 9.4   | 1     | 100.00            | 0.987277      | 0.985063 | 1.394656         |
| 498 | 9    | 8.1   | 1     | 100.00            | 0.987277      | 0.984946 | 1.394574         |
| 499 | 649  | 1     | 1     | 99.31             | 0.979644      | 0.992483 | 1.394534         |
| 500 | 2    | 10    | 1     | 100.00            | 0.984733      | 0.987387 | 1.394501         |
| 501 | 2    | 8.8   | 1     | 99.77             | 0.984733      | 0.987342 | 1.394469         |
| 502 | 932  | 1     | 1     | 99.31             | 0.982188      | 0.989796 | 1.394414         |
| 503 | 9    | 8     | 1     | 100.00            | 0.987277      | 0.984707 | 1.394405         |
| 504 | 2    | 10.1  | 1     | 100.00            | 0.984733      | 0.987219 | 1.394382         |
| 505 | 9    | 8.6   | 1     | 100.00            | 0.987277      | 0.984616 | 1.394341         |
| 506 | 352  | 1     | 1     | 99.31             | 0.982188      | 0.989660 | 1.394317         |
| 507 | 961  | 7     | 1     | 100.00            | 0.982188      | 0.989647 | 1.394308         |
| 508 | 2    | 10.2  | 1     | 100.00            | 0.984733      | 0.987109 | 1.394304         |
| 509 | 2    | 10.3  | 1     | 100.00            | 0.984733      | 0.986954 | 1.394194         |
| 510 | 2    | 8.4   | 1     | 99.77             | 0.984733      | 0.986863 | 1.394130         |
| 511 | 2    | 10.4  | 1     | 100.00            | 0.984733      | 0.986837 | 1.394111         |
| 512 | 2    | 9     | 1     | 99.77             | 0.984733      | 0.986824 | 1.394102         |
| 513 | 9    | 8.8   | 1     | 100.00            | 0.987277      | 0.984176 | 1.394030         |
| 514 | 9    | 9.3   | 1     | 100.00            | 0.987277      | 0.984150 | 1.394011         |
| 515 | 2    | 10.5  | 1     | 100.00            | 0.984733      | 0.986682 | 1.394001         |
| 516 | 2    | 8.3   | 1     | 99.77             | 0.984733      | 0.986643 | 1.393974         |
| 517 | 2    | 8.1   | 1     | 99.77             | 0.984733      | 0.986585 | 1.393933         |
| 518 | 2    | 10.6  | 1     | 100.00            | 0.984733      | 0.986552 | 1.393910         |
| 519 | 2    | 8     | 1     | 99.77             | 0.984733      | 0.986513 | 1.393882         |
| 520 | 9    | 9.4   | 1     | 100.00            | 0.987277      | 0.983962 | 1.393879         |



**Supplementary Table 5.** Continued.

| No. | Seed | Cost | Gamma | Training_Accuracy | Test_Accuracy | Test_AUC | Euclidean length |
|-----|------|------|-------|-------------------|---------------|----------|------------------|
| 521 | 2    | 10.7 | 1     | 100.00            | 0.984733      | 0.986403 | 1.393804         |
| 522 | 9    | 9.5  | 1     | 100.00            | 0.987277      | 0.983813 | 1.393774         |
| 523 | 9    | 9.6  | 1     | 100.00            | 0.987277      | 0.983703 | 1.393696         |
| 524 | 2    | 9.3  | 1     | 99.77             | 0.984733      | 0.986209 | 1.393667         |
| 525 | 10   | 8.5  | 1     | 100.00            | 0.987277      | 0.983658 | 1.393664         |
| 526 | 9    | 9.7  | 1     | 100.00            | 0.987277      | 0.983645 | 1.393655         |
| 527 | 10   | 8.8  | 1     | 100.00            | 0.987277      | 0.983639 | 1.393650         |
| 528 | 9    | 9.8  | 1     | 100.00            | 0.987277      | 0.983613 | 1.393632         |
| 529 | 2    | 10.8 | 1     | 100.00            | 0.984733      | 0.986125 | 1.393607         |
| 530 | 6    | 8.4  | 1     | 100.00            | 0.984733      | 0.986125 | 1.393607         |
| 531 | 6    | 8.3  | 1     | 100.00            | 0.984733      | 0.986118 | 1.393603         |
| 532 | 6    | 8.5  | 1     | 100.00            | 0.984733      | 0.986118 | 1.393603         |
| 533 | 686  | 1    | 1     | 99.31             | 0.982188      | 0.988637 | 1.393591         |
| 534 | 10   | 9.6  | 1     | 100.00            | 0.987277      | 0.983535 | 1.393577         |
| 535 | 10   | 9.1  | 1     | 100.00            | 0.987277      | 0.983503 | 1.393554         |
| 536 | 6    | 8.6  | 1     | 100.00            | 0.984733      | 0.986041 | 1.393548         |
| 537 | 961  | 1    | 1     | 99.31             | 0.982188      | 0.988572 | 1.393545         |
| 538 | 2    | 8.9  | 1     | 99.77             | 0.984733      | 0.986034 | 1.393543         |
| 539 | 2    | 10.9 | 1     | 100.00            | 0.984733      | 0.985995 | 1.393516         |
| 540 | 10   | 8.7  | 1     | 100.00            | 0.987277      | 0.983431 | 1.393504         |
| 541 | 6    | 8.7  | 1     | 100.00            | 0.984733      | 0.985969 | 1.393497         |
| 542 | 9    | 10   | 1     | 100.00            | 0.987277      | 0.983406 | 1.393486         |
| 543 | 6    | 9    | 1     | 100.00            | 0.984733      | 0.985944 | 1.393479         |
| 544 | 6    | 8.9  | 1     | 100.00            | 0.984733      | 0.985937 | 1.393474         |
| 545 | 6    | 8.8  | 1     | 100.00            | 0.984733      | 0.985931 | 1.393470         |
| 546 | 6    | 8.2  | 1     | 100.00            | 0.984733      | 0.985905 | 1.393451         |
| 547 | 6    | 9.1  | 1     | 100.00            | 0.984733      | 0.985898 | 1.393447         |
| 548 | 9    | 10.1 | 1     | 100.00            | 0.987277      | 0.983347 | 1.393445         |
| 549 | 9    | 10.2 | 1     | 100.00            | 0.987277      | 0.983321 | 1.393427         |
| 550 | 6    | 9.2  | 1     | 100.00            | 0.984733      | 0.985866 | 1.393424         |
| 551 | 2    | 11   | 1     | 100.00            | 0.984733      | 0.985795 | 1.393374         |
| 552 | 6    | 9.3  | 1     | 100.00            | 0.984733      | 0.985782 | 1.393364         |
| 553 | 2    | 8.7  | 1     | 99.77             | 0.984733      | 0.985749 | 1.393341         |
| 554 | 4    | 8.5  | 1     | 99.77             | 0.987277      | 0.983159 | 1.393312         |
| 555 | 6    | 8.1  | 1     | 100.00            | 0.984733      | 0.985704 | 1.393309         |
| 556 | 9    | 8.9  | 1     | 100.00            | 0.987277      | 0.983114 | 1.393280         |
| 557 | 6    | 9.5  | 1     | 100.00            | 0.984733      | 0.985659 | 1.393277         |
| 558 | 4    | 8.4  | 1     | 99.77             | 0.987277      | 0.983108 | 1.393276         |
| 559 | 2    | 9.1  | 1     | 99.77             | 0.984733      | 0.985600 | 1.393236         |
| 560 | 6    | 9.6  | 1     | 100.00            | 0.984733      | 0.985581 | 1.393222         |
| 561 | 10   | 2    | 1     | 99.54             | 0.984733      | 0.985581 | 1.393222         |
| 562 | 2    | 9.5  | 1     | 100.00            | 0.984733      | 0.985555 | 1.393204         |
| 563 | 6    | 9.7  | 1     | 100.00            | 0.984733      | 0.985536 | 1.393190         |
| 564 | 6    | 9.8  | 1     | 100.00            | 0.984733      | 0.985536 | 1.393190         |
| 565 | 6    | 9.9  | 1     | 100.00            | 0.984733      | 0.985529 | 1.393186         |
| 566 | 2    | 9.2  | 1     | 99.77             | 0.984733      | 0.985516 | 1.393177         |
| 567 | 6    | 10   | 1     | 100.00            | 0.984733      | 0.985471 | 1.393145         |
| 568 | 6    | 8    | 1     | 100.00            | 0.984733      | 0.985452 | 1.393131         |
| 569 | 6    | 10.1 | 1     | 100.00            | 0.984733      | 0.985400 | 1.393094         |
| 570 | 4    | 8.1  | 1     | 99.77             | 0.987277      | 0.982836 | 1.393084         |
| 571 | 4    | 10.9 | 1     | 100.00            | 0.987277      | 0.982810 | 1.393066         |
| 572 | 4    | 9.4  | 1     | 100.00            | 0.987277      | 0.982777 | 1.393043         |

**Supplementary Table 5.** Continued.

| No. | Seed | Cost | Gamma | Training_Accuracy | Test_Accuracy | Test_AUC | Euclidean length |
|-----|------|------|-------|-------------------|---------------|----------|------------------|
| 573 | 4    | 11   | 1     | 100.00            | 0.987277      | 0.982771 | 1.393038         |
| 574 | 10   | 11   | 1     | 100.00            | 0.987277      | 0.982758 | 1.393029         |
| 575 | 10   | 10.4 | 1     | 100.00            | 0.987277      | 0.982758 | 1.393029         |
| 576 | 4    | 8.6  | 1     | 100.00            | 0.987277      | 0.982739 | 1.393015         |
| 577 | 10   | 10.9 | 1     | 100.00            | 0.987277      | 0.982739 | 1.393015         |
| 578 | 4    | 9.5  | 1     | 100.00            | 0.987277      | 0.982726 | 1.393006         |
| 579 | 4    | 10.3 | 1     | 100.00            | 0.987277      | 0.982719 | 1.393002         |
| 580 | 4    | 9.3  | 1     | 100.00            | 0.987277      | 0.982713 | 1.392997         |
| 581 | 10   | 10.8 | 1     | 100.00            | 0.987277      | 0.982706 | 1.392993         |
| 582 | 4    | 10.4 | 1     | 100.00            | 0.987277      | 0.982700 | 1.392988         |
| 583 | 4    | 10.1 | 1     | 100.00            | 0.987277      | 0.982674 | 1.392970         |
| 584 | 4    | 8    | 1     | 99.77             | 0.987277      | 0.982667 | 1.392965         |
| 585 | 4    | 10.2 | 1     | 100.00            | 0.987277      | 0.982661 | 1.392961         |
| 586 | 4    | 9.2  | 1     | 99.77             | 0.987277      | 0.982661 | 1.392961         |
| 587 | 4    | 9.9  | 1     | 100.00            | 0.987277      | 0.982654 | 1.392956         |
| 588 | 4    | 10.5 | 1     | 100.00            | 0.987277      | 0.982648 | 1.392951         |
| 589 | 4    | 8.7  | 1     | 100.00            | 0.987277      | 0.982648 | 1.392951         |
| 590 | 4    | 10.6 | 1     | 100.00            | 0.987277      | 0.982642 | 1.392947         |
| 591 | 4    | 10.7 | 1     | 100.00            | 0.987277      | 0.982629 | 1.392938         |
| 592 | 10   | 8.6  | 1     | 100.00            | 0.987277      | 0.982596 | 1.392915         |
| 593 | 4    | 10.8 | 1     | 100.00            | 0.987277      | 0.982596 | 1.392915         |
| 594 | 4    | 9.8  | 1     | 100.00            | 0.987277      | 0.982583 | 1.392906         |
| 595 | 4    | 9.6  | 1     | 100.00            | 0.987277      | 0.982583 | 1.392906         |
| 596 | 4    | 9.7  | 1     | 100.00            | 0.987277      | 0.982577 | 1.392901         |
| 597 | 4    | 8.8  | 1     | 100.00            | 0.987277      | 0.982538 | 1.392874         |
| 598 | 4    | 8.9  | 1     | 100.00            | 0.987277      | 0.982486 | 1.392837         |
| 599 | 4    | 9.1  | 1     | 99.77             | 0.987277      | 0.982486 | 1.392837         |
| 600 | 9    | 8.5  | 1     | 100.00            | 0.987277      | 0.982486 | 1.392837         |
| 601 | 4    | 9    | 1     | 99.77             | 0.987277      | 0.982467 | 1.392824         |
| 602 | 6    | 10.9 | 1     | 100.00            | 0.984733      | 0.984752 | 1.392636         |
| 603 | 6    | 10.5 | 1     | 100.00            | 0.984733      | 0.984733 | 1.392623         |
| 604 | 9    | 9.9  | 1     | 100.00            | 0.987277      | 0.982149 | 1.392600         |
| 605 | 9    | 9    | 1     | 100.00            | 0.987277      | 0.982130 | 1.392586         |
| 606 | 10   | 4    | 1     | 100.00            | 0.984733      | 0.984662 | 1.392572         |
| 607 | 10   | 8.3  | 1     | 100.00            | 0.987277      | 0.982104 | 1.392568         |
| 608 | 6    | 11   | 1     | 100.00            | 0.984733      | 0.984636 | 1.392554         |
| 609 | 9    | 9.2  | 1     | 100.00            | 0.987277      | 0.981955 | 1.392463         |
| 610 | 9    | 9.1  | 1     | 100.00            | 0.987277      | 0.981858 | 1.392394         |
| 611 | 2    | 13   | 1     | 100.00            | 0.982188      | 0.986908 | 1.392366         |
| 612 | 4    | 10   | 1     | 100.00            | 0.987277      | 0.981800 | 1.392353         |
| 613 | 9    | 2    | 1     | 99.77             | 0.984733      | 0.984215 | 1.392256         |
| 614 | 9    | 8.7  | 1     | 100.00            | 0.987277      | 0.981657 | 1.392253         |
| 615 | 10   | 8.2  | 1     | 100.00            | 0.987277      | 0.981651 | 1.392248         |
| 616 | 6    | 9.4  | 1     | 100.00            | 0.984733      | 0.984131 | 1.392197         |
| 617 | 2    | 8.2  | 1     | 99.77             | 0.984733      | 0.984092 | 1.392169         |
| 618 | 158  | 0.5  | 1     | 99.31             | 0.979644      | 0.989013 | 1.392066         |
| 619 | 9    | 12   | 1     | 100.00            | 0.984733      | 0.983885 | 1.392023         |
| 620 | 9    | 14   | 1     | 100.00            | 0.984733      | 0.983613 | 1.391831         |
| 621 | 10   | 10.5 | 1     | 100.00            | 0.987277      | 0.981003 | 1.391792         |
| 622 | 10   | 10.6 | 1     | 100.00            | 0.987277      | 0.980965 | 1.391764         |
| 623 | 10   | 9.5  | 1     | 100.00            | 0.987277      | 0.980965 | 1.391764         |
| 624 | 9    | 15   | 1     | 100.00            | 0.984733      | 0.983503 | 1.391753         |

**Supplementary Table 5. Continued.**

| No. | Seed | Cost | Gamma | Training_Accuracy | Test_Accuracy | Test_AUC | Euclidean length |
|-----|------|------|-------|-------------------|---------------|----------|------------------|
| 625 | 10   | 9    | 1     | 100.00            | 0.987277      | 0.980893 | 1.391714         |
| 626 | 9    | 11   | 1     | 100.00            | 0.984733      | 0.983386 | 1.391671         |
| 627 | 10   | 10.3 | 1     | 100.00            | 0.987277      | 0.980809 | 1.391655         |
| 628 | 9    | 10.9 | 1     | 100.00            | 0.984733      | 0.983354 | 1.391648         |
| 629 | 9    | 10.8 | 1     | 100.00            | 0.984733      | 0.983315 | 1.391620         |
| 630 | 9    | 10.6 | 1     | 100.00            | 0.984733      | 0.983308 | 1.391616         |
| 631 | 9    | 10.7 | 1     | 100.00            | 0.984733      | 0.983276 | 1.391593         |
| 632 | 9    | 10.4 | 1     | 100.00            | 0.984733      | 0.983244 | 1.391570         |
| 633 | 9    | 10.5 | 1     | 100.00            | 0.984733      | 0.983244 | 1.391570         |
| 634 | 9    | 10.3 | 1     | 100.00            | 0.984733      | 0.983218 | 1.391552         |
| 635 | 4    | 4    | 1     | 100.00            | 0.984733      | 0.983185 | 1.391529         |
| 636 | 2    | 14   | 1     | 100.00            | 0.982188      | 0.985665 | 1.391485         |
| 637 | 6    | 10.6 | 1     | 100.00            | 0.984733      | 0.983075 | 1.391451         |
| 638 | 10   | 10   | 1     | 100.00            | 0.987277      | 0.980518 | 1.391450         |
| 639 | 4    | 8.2  | 1     | 99.77             | 0.987277      | 0.980485 | 1.391427         |
| 640 | 4    | 8.3  | 1     | 99.77             | 0.987277      | 0.980485 | 1.391427         |
| 641 | 4    | 12   | 1     | 100.00            | 0.984733      | 0.983011 | 1.391405         |
| 642 | 10   | 13   | 1     | 100.00            | 0.984733      | 0.982959 | 1.391369         |
| 643 | 6    | 10.3 | 1     | 100.00            | 0.984733      | 0.982939 | 1.391355         |
| 644 | 10   | 12   | 1     | 100.00            | 0.984733      | 0.982926 | 1.391346         |
| 645 | 8    | 8.6  | 1     | 99.77             | 0.984733      | 0.982913 | 1.391337         |
| 646 | 2    | 12   | 1     | 100.00            | 0.982188      | 0.985439 | 1.391324         |
| 647 | 8    | 10.1 | 1     | 100.00            | 0.984733      | 0.982888 | 1.391318         |
| 648 | 8    | 10.4 | 1     | 100.00            | 0.984733      | 0.982855 | 1.391295         |
| 649 | 8    | 10.3 | 1     | 100.00            | 0.984733      | 0.982842 | 1.391286         |
| 650 | 8    | 9.8  | 1     | 99.77             | 0.984733      | 0.982842 | 1.391286         |
| 651 | 8    | 10.2 | 1     | 100.00            | 0.984733      | 0.982836 | 1.391282         |
| 652 | 8    | 10   | 1     | 100.00            | 0.984733      | 0.982829 | 1.391277         |
| 653 | 8    | 8.9  | 1     | 99.77             | 0.984733      | 0.982829 | 1.391277         |
| 654 | 8    | 9.9  | 1     | 100.00            | 0.984733      | 0.982823 | 1.391273         |
| 655 | 8    | 8.8  | 1     | 99.77             | 0.984733      | 0.982823 | 1.391273         |
| 656 | 8    | 10.5 | 1     | 100.00            | 0.984733      | 0.982816 | 1.391268         |
| 657 | 8    | 9.5  | 1     | 99.77             | 0.984733      | 0.982816 | 1.391268         |
| 658 | 8    | 9.6  | 1     | 99.77             | 0.984733      | 0.982816 | 1.391268         |
| 659 | 2    | 2    | 1     | 99.54             | 0.982188      | 0.985354 | 1.391265         |
| 660 | 10   | 14   | 1     | 100.00            | 0.984733      | 0.982797 | 1.391254         |
| 661 | 4    | 13   | 1     | 100.00            | 0.984733      | 0.982797 | 1.391254         |
| 662 | 8    | 8.7  | 1     | 99.77             | 0.984733      | 0.982797 | 1.391254         |
| 663 | 8    | 9.4  | 1     | 99.77             | 0.984733      | 0.982784 | 1.391245         |
| 664 | 6    | 10.2 | 1     | 100.00            | 0.984733      | 0.982777 | 1.391241         |
| 665 | 8    | 9.7  | 1     | 99.77             | 0.984733      | 0.982771 | 1.391236         |
| 666 | 6    | 12   | 1     | 100.00            | 0.982188      | 0.985296 | 1.391223         |
| 667 | 4    | 14   | 1     | 100.00            | 0.984733      | 0.982752 | 1.391222         |
| 668 | 10   | 10.7 | 1     | 100.00            | 0.987277      | 0.980194 | 1.391221         |
| 669 | 8    | 9    | 1     | 99.77             | 0.984733      | 0.982745 | 1.391218         |
| 670 | 8    | 9.3  | 1     | 99.77             | 0.984733      | 0.982719 | 1.391199         |
| 671 | 10   | 9.2  | 1     | 100.00            | 0.987277      | 0.980155 | 1.391194         |
| 672 | 8    | 9.2  | 1     | 99.77             | 0.984733      | 0.982700 | 1.391186         |
| 673 | 8    | 11   | 1     | 100.00            | 0.984733      | 0.982674 | 1.391167         |
| 674 | 8    | 10.9 | 1     | 100.00            | 0.984733      | 0.982661 | 1.391158         |
| 675 | 8    | 9.1  | 1     | 99.77             | 0.984733      | 0.982654 | 1.391154         |
| 676 | 6    | 10.7 | 1     | 100.00            | 0.984733      | 0.982480 | 1.391030         |

**Supplementary Table 5.** Continued.

| No. | Seed | Cost  | Gamma | Training_Accuracy | Test_Accuracy | Test_AUC | Euclidean length |
|-----|------|-------|-------|-------------------|---------------|----------|------------------|
| 677 | 10   | 5     | 1     | 100.00            | 0.982188      | 0.985011 | 1.391022         |
| 678 | 10   | 8.4   | 1     | 100.00            | 0.987277      | 0.979903 | 1.391016         |
| 679 | 10   | 15    | 1     | 100.00            | 0.984733      | 0.982383 | 1.390962         |
| 680 | 6    | 10.4  | 1     | 100.00            | 0.984733      | 0.982331 | 1.390925         |
| 681 | 6    | 10.8  | 1     | 100.00            | 0.984733      | 0.982324 | 1.390920         |
| 682 | 10   | 16    | 1     | 100.00            | 0.984733      | 0.982279 | 1.390888         |
| 683 | 4    | 15    | 1     | 100.00            | 0.984733      | 0.982240 | 1.390861         |
| 684 | 10   | 9.9   | 1     | 100.00            | 0.987277      | 0.979611 | 1.390811         |
| 685 | 4    | 16    | 1     | 100.00            | 0.984733      | 0.982078 | 1.390747         |
| 686 | 10   | 7     | 1     | 100.00            | 0.982188      | 0.984506 | 1.390664         |
| 687 | 6    | 2     | 1     | 99.54             | 0.982188      | 0.984448 | 1.390623         |
| 688 | 6    | 16    | 1     | 100.00            | 0.982188      | 0.984047 | 1.390339         |
| 689 | 6    | 14    | 1     | 100.00            | 0.982188      | 0.984027 | 1.390325         |
| 690 | 4    | 2     | 1     | 99.54             | 0.984733      | 0.981411 | 1.390276         |
| 691 | 2    | 16    | 1     | 100.00            | 0.982188      | 0.983936 | 1.390261         |
| 692 | 2    | 4     | 1     | 100.00            | 0.982188      | 0.983923 | 1.390252         |
| 693 | 10   | 8.9   | 1     | 100.00            | 0.987277      | 0.978737 | 1.390195         |
| 694 | 9    | 13    | 1     | 100.00            | 0.984733      | 0.981249 | 1.390162         |
| 695 | 10   | 9.3   | 1     | 100.00            | 0.987277      | 0.978588 | 1.390091         |
| 696 | 2    | 7     | 1     | 100.00            | 0.982188      | 0.983554 | 1.389990         |
| 697 | 8    | 8.3   | 1     | 99.77             | 0.984733      | 0.980945 | 1.389947         |
| 698 | 10   | 10.1  | 1     | 100.00            | 0.987277      | 0.978362 | 1.389931         |
| 699 | 10   | 10.2  | 1     | 100.00            | 0.987277      | 0.978310 | 1.389895         |
| 700 | 10   | 32    | 1     | 100.00            | 0.984733      | 0.980867 | 1.389892         |
| 701 | 8    | 10.8  | 1     | 100.00            | 0.984733      | 0.980855 | 1.389883         |
| 702 | 2    | 128   | 1     | 100.00            | 0.982188      | 0.983399 | 1.389880         |
| 703 | 2    | 2048  | 1     | 100.00            | 0.982188      | 0.983399 | 1.389880         |
| 704 | 2    | 32768 | 1     | 100.00            | 0.982188      | 0.983399 | 1.389880         |
| 705 | 2    | 512   | 1     | 100.00            | 0.982188      | 0.983399 | 1.389880         |
| 706 | 2    | 8192  | 1     | 100.00            | 0.982188      | 0.983399 | 1.389880         |
| 707 | 2    | 64    | 1     | 100.00            | 0.982188      | 0.983399 | 1.389880         |
| 708 | 8    | 8.4   | 1     | 99.77             | 0.984733      | 0.980809 | 1.389851         |
| 709 | 8    | 10.6  | 1     | 100.00            | 0.984733      | 0.980744 | 1.389805         |
| 710 | 9    | 16    | 1     | 100.00            | 0.984733      | 0.980712 | 1.389782         |
| 711 | 4    | 7     | 1     | 100.00            | 0.984733      | 0.980667 | 1.389750         |
| 712 | 2    | 6     | 1     | 100.00            | 0.982188      | 0.983147 | 1.389702         |
| 713 | 8    | 13    | 1     | 100.00            | 0.982188      | 0.983088 | 1.389661         |
| 714 | 8    | 10.7  | 1     | 100.00            | 0.984733      | 0.980524 | 1.389650         |
| 715 | 8    | 12    | 1     | 100.00            | 0.982188      | 0.983056 | 1.389638         |
| 716 | 435  | 0.5   | 1     | 98.85             | 0.977099      | 0.988028 | 1.389577         |
| 717 | 8    | 8.5   | 1     | 99.77             | 0.984733      | 0.980375 | 1.389545         |
| 718 | 2    | 32    | 1     | 100.00            | 0.982188      | 0.982693 | 1.389381         |
| 719 | 8    | 14    | 1     | 100.00            | 0.982188      | 0.982667 | 1.389363         |
| 720 | 4    | 32    | 1     | 100.00            | 0.984733      | 0.980078 | 1.389335         |
| 721 | 2    | 1     | 1     | 99.31             | 0.979644      | 0.985102 | 1.389290         |
| 722 | 1    | 8     | 1     | 100.00            | 0.982188      | 0.982460 | 1.389216         |
| 723 | 10   | 6     | 1     | 100.00            | 0.982188      | 0.982376 | 1.389157         |
| 724 | 1    | 8.1   | 1     | 99.77             | 0.982188      | 0.982311 | 1.389111         |
| 725 | 1    | 8.5   | 1     | 99.77             | 0.982188      | 0.982214 | 1.389042         |
| 726 | 1    | 8.4   | 1     | 99.77             | 0.982188      | 0.982182 | 1.389019         |
| 727 | 1    | 8.2   | 1     | 99.77             | 0.982188      | 0.982104 | 1.388964         |
| 728 | 9    | 32    | 1     | 100.00            | 0.982188      | 0.982052 | 1.388928         |

**Supplementary Table 5. Continued.**

| No. | Seed | Cost  | Gamma | Training_Accuracy | Test_Accuracy | Test_AUC | Euclidean length |
|-----|------|-------|-------|-------------------|---------------|----------|------------------|
| 729 | 1    | 8.6   | 1     | 100.00            | 0.982188      | 0.982039 | 1.388919         |
| 730 | 2    | 5     | 1     | 100.00            | 0.979644      | 0.984506 | 1.388868         |
| 731 | 1    | 8.7   | 1     | 100.00            | 0.982188      | 0.981955 | 1.388859         |
| 732 | 9    | 4     | 1     | 100.00            | 0.982188      | 0.981903 | 1.388823         |
| 733 | 8    | 8.1   | 1     | 99.77             | 0.984733      | 0.979327 | 1.388805         |
| 734 | 9    | 1     | 1     | 99.31             | 0.982188      | 0.981845 | 1.388781         |
| 735 | 649  | 0.5   | 1     | 99.31             | 0.979644      | 0.984338 | 1.388749         |
| 736 | 8    | 32    | 1     | 100.00            | 0.982188      | 0.981761 | 1.388722         |
| 737 | 8    | 15    | 1     | 100.00            | 0.982188      | 0.981709 | 1.388685         |
| 738 | 9    | 6     | 1     | 100.00            | 0.979644      | 0.984247 | 1.388684         |
| 739 | 352  | 0.5   | 1     | 98.85             | 0.979644      | 0.984234 | 1.388675         |
| 740 | 1    | 8.9   | 1     | 99.77             | 0.982188      | 0.981638 | 1.388635         |
| 741 | 8    | 8     | 1     | 99.77             | 0.984733      | 0.979061 | 1.388618         |
| 742 | 9    | 7     | 1     | 100.00            | 0.979644      | 0.984131 | 1.388602         |
| 743 | 2    | 15    | 1     | 100.00            | 0.982188      | 0.981496 | 1.388534         |
| 744 | 4    | 5     | 1     | 100.00            | 0.982188      | 0.981483 | 1.388525         |
| 745 | 1    | 9     | 1     | 99.77             | 0.982188      | 0.981418 | 1.388479         |
| 746 | 9    | 5     | 1     | 100.00            | 0.979644      | 0.983943 | 1.388469         |
| 747 | 8    | 2     | 1     | 99.54             | 0.982188      | 0.981392 | 1.388461         |
| 748 | 4    | 6     | 1     | 100.00            | 0.982188      | 0.981353 | 1.388434         |
| 749 | 1    | 9.1   | 1     | 99.77             | 0.982188      | 0.981347 | 1.388429         |
| 750 | 1    | 9.2   | 1     | 99.77             | 0.982188      | 0.981308 | 1.388402         |
| 751 | 1    | 9.4   | 1     | 99.77             | 0.982188      | 0.981301 | 1.388397         |
| 752 | 1    | 9.3   | 1     | 99.77             | 0.982188      | 0.981269 | 1.388374         |
| 753 | 1    | 9.5   | 1     | 99.77             | 0.982188      | 0.981217 | 1.388337         |
| 754 | 8    | 128   | 1     | 100.00            | 0.982188      | 0.981165 | 1.388301         |
| 755 | 8    | 2048  | 1     | 100.00            | 0.982188      | 0.981165 | 1.388301         |
| 756 | 8    | 32768 | 1     | 100.00            | 0.982188      | 0.981165 | 1.388301         |
| 757 | 8    | 512   | 1     | 100.00            | 0.982188      | 0.981165 | 1.388301         |
| 758 | 8    | 8192  | 1     | 100.00            | 0.982188      | 0.981165 | 1.388301         |
| 759 | 8    | 64    | 1     | 100.00            | 0.982188      | 0.981165 | 1.388301         |
| 760 | 1    | 9.6   | 1     | 100.00            | 0.982188      | 0.981055 | 1.388223         |
| 761 | 1    | 9.7   | 1     | 100.00            | 0.982188      | 0.980958 | 1.388154         |
| 762 | 1    | 9.8   | 1     | 100.00            | 0.982188      | 0.980783 | 1.388031         |
| 763 | 10   | 1     | 1     | 99.31             | 0.982188      | 0.980706 | 1.387976         |
| 764 | 1    | 9.9   | 1     | 100.00            | 0.982188      | 0.980634 | 1.387926         |
| 765 | 9    | 128   | 1     | 100.00            | 0.982188      | 0.980589 | 1.387894         |
| 766 | 9    | 2048  | 1     | 100.00            | 0.982188      | 0.980589 | 1.387894         |
| 767 | 9    | 32768 | 1     | 100.00            | 0.982188      | 0.980589 | 1.387894         |
| 768 | 9    | 512   | 1     | 100.00            | 0.982188      | 0.980589 | 1.387894         |
| 769 | 9    | 8192  | 1     | 100.00            | 0.982188      | 0.980589 | 1.387894         |
| 770 | 9    | 64    | 1     | 100.00            | 0.982188      | 0.980589 | 1.387894         |
| 771 | 1    | 10    | 1     | 100.00            | 0.982188      | 0.980570 | 1.387880         |
| 772 | 1    | 8.3   | 1     | 99.77             | 0.982188      | 0.980524 | 1.387848         |
| 773 | 1    | 10.1  | 1     | 100.00            | 0.982188      | 0.980388 | 1.387752         |
| 774 | 1    | 10.2  | 1     | 100.00            | 0.982188      | 0.980311 | 1.387697         |
| 775 | 10   | 9.7   | 1     | 100.00            | 0.987277      | 0.975112 | 1.387645         |
| 776 | 6    | 32    | 1     | 100.00            | 0.979644      | 0.982693 | 1.387584         |
| 777 | 10   | 9.8   | 1     | 100.00            | 0.987277      | 0.974989 | 1.387559         |
| 778 | 1    | 10.3  | 1     | 100.00            | 0.982188      | 0.980097 | 1.387546         |
| 779 | 1    | 10.4  | 1     | 100.00            | 0.982188      | 0.980019 | 1.387491         |
| 780 | 5    | 10.6  | 1     | 100.00            | 0.987277      | 0.974807 | 1.387431         |

**Supplementary Table 5. Continued.**

| No. | Seed | Cost  | Gamma | Training_Accuracy | Test_Accuracy | Test_AUC | Euclidean length |
|-----|------|-------|-------|-------------------|---------------|----------|------------------|
| 781 | 1    | 4     | 1     | 100.00            | 0.979644      | 0.982460 | 1.387418         |
| 782 | 1    | 10.5  | 1     | 100.00            | 0.982188      | 0.979916 | 1.387418         |
| 783 | 6    | 13    | 1     | 100.00            | 0.982188      | 0.979896 | 1.387404         |
| 784 | 5    | 10.7  | 1     | 100.00            | 0.987277      | 0.974749 | 1.387390         |
| 785 | 5    | 10.8  | 1     | 100.00            | 0.987277      | 0.974730 | 1.387377         |
| 786 | 8    | 16    | 1     | 100.00            | 0.982188      | 0.979851 | 1.387372         |
| 787 | 5    | 10.9  | 1     | 100.00            | 0.987277      | 0.974710 | 1.387363         |
| 788 | 5    | 11    | 1     | 100.00            | 0.987277      | 0.974691 | 1.387349         |
| 789 | 1    | 10.6  | 1     | 100.00            | 0.982188      | 0.979819 | 1.387349         |
| 790 | 1    | 10.7  | 1     | 100.00            | 0.982188      | 0.979747 | 1.387299         |
| 791 | 5    | 10.5  | 1     | 100.00            | 0.987277      | 0.974594 | 1.387281         |
| 792 | 1    | 10.8  | 1     | 100.00            | 0.982188      | 0.979676 | 1.387249         |
| 793 | 5    | 10.4  | 1     | 100.00            | 0.987277      | 0.974522 | 1.387231         |
| 794 | 1    | 10.9  | 1     | 100.00            | 0.982188      | 0.979637 | 1.387221         |
| 795 | 1    | 11    | 1     | 100.00            | 0.982188      | 0.979585 | 1.387185         |
| 796 | 5    | 10.3  | 1     | 100.00            | 0.987277      | 0.974445 | 1.387177         |
| 797 | 5    | 10.2  | 1     | 100.00            | 0.987277      | 0.974438 | 1.387172         |
| 798 | 5    | 8.4   | 1     | 100.00            | 0.987277      | 0.974406 | 1.387149         |
| 799 | 6    | 15    | 1     | 100.00            | 0.982188      | 0.979469 | 1.387102         |
| 800 | 5    | 8.5   | 1     | 100.00            | 0.987277      | 0.974322 | 1.387090         |
| 801 | 5    | 10.1  | 1     | 100.00            | 0.987277      | 0.974302 | 1.387077         |
| 802 | 5    | 8.3   | 1     | 99.77             | 0.987277      | 0.974276 | 1.387058         |
| 803 | 6    | 128   | 1     | 100.00            | 0.979644      | 0.981890 | 1.387015         |
| 804 | 6    | 2048  | 1     | 100.00            | 0.979644      | 0.981890 | 1.387015         |
| 805 | 6    | 32768 | 1     | 100.00            | 0.979644      | 0.981890 | 1.387015         |
| 806 | 6    | 512   | 1     | 100.00            | 0.979644      | 0.981890 | 1.387015         |
| 807 | 6    | 8192  | 1     | 100.00            | 0.979644      | 0.981890 | 1.387015         |
| 808 | 6    | 64    | 1     | 100.00            | 0.979644      | 0.981890 | 1.387015         |
| 809 | 1    | 8.8   | 1     | 100.00            | 0.982188      | 0.979288 | 1.386974         |
| 810 | 5    | 8.2   | 1     | 99.77             | 0.987277      | 0.974069 | 1.386913         |
| 811 | 1    | 6     | 1     | 100.00            | 0.977099      | 0.984195 | 1.386854         |
| 812 | 5    | 10    | 1     | 100.00            | 0.987277      | 0.973920 | 1.386808         |
| 813 | 5    | 8.7   | 1     | 100.00            | 0.987277      | 0.973875 | 1.386776         |
| 814 | 5    | 8.1   | 1     | 100.00            | 0.987277      | 0.973868 | 1.386772         |
| 815 | 5    | 9.9   | 1     | 100.00            | 0.987277      | 0.973862 | 1.386767         |
| 816 | 5    | 8.6   | 1     | 100.00            | 0.987277      | 0.973849 | 1.386758         |
| 817 | 5    | 9     | 1     | 100.00            | 0.987277      | 0.973836 | 1.386749         |
| 818 | 5    | 8.8   | 1     | 100.00            | 0.987277      | 0.973836 | 1.386749         |
| 819 | 5    | 8.9   | 1     | 100.00            | 0.987277      | 0.973817 | 1.386735         |
| 820 | 5    | 9.8   | 1     | 100.00            | 0.987277      | 0.973817 | 1.386735         |
| 821 | 5    | 9.5   | 1     | 100.00            | 0.987277      | 0.973791 | 1.386717         |
| 822 | 5    | 9.6   | 1     | 100.00            | 0.987277      | 0.973791 | 1.386717         |
| 823 | 5    | 9.7   | 1     | 100.00            | 0.987277      | 0.973791 | 1.386717         |
| 824 | 5    | 9.1   | 1     | 100.00            | 0.987277      | 0.973771 | 1.386704         |
| 825 | 5    | 9.2   | 1     | 100.00            | 0.987277      | 0.973771 | 1.386704         |
| 826 | 1    | 5     | 1     | 100.00            | 0.977099      | 0.983943 | 1.386675         |
| 827 | 183  | 0.5   | 1     | 98.85             | 0.977099      | 0.983930 | 1.386665         |
| 828 | 5    | 9.4   | 1     | 100.00            | 0.987277      | 0.973655 | 1.386622         |
| 829 | 5    | 9.3   | 1     | 100.00            | 0.987277      | 0.973635 | 1.386608         |
| 830 | 5    | 8     | 1     | 100.00            | 0.987277      | 0.973609 | 1.386590         |
| 831 | 8    | 4     | 1     | 100.00            | 0.982188      | 0.978601 | 1.386490         |
| 832 | 4    | 128   | 1     | 100.00            | 0.982188      | 0.978459 | 1.386389         |

**Supplementary Table 5.** Continued.

| No. | Seed | Cost  | Gamma | Training_Accuracy | Test_Accuracy | Test_AUC | Euclidean length |
|-----|------|-------|-------|-------------------|---------------|----------|------------------|
| 833 | 4    | 2048  | 1     | 100.00            | 0.982188      | 0.978459 | 1.386389         |
| 834 | 4    | 32768 | 1     | 100.00            | 0.982188      | 0.978459 | 1.386389         |
| 835 | 4    | 512   | 1     | 100.00            | 0.982188      | 0.978459 | 1.386389         |
| 836 | 4    | 8192  | 1     | 100.00            | 0.982188      | 0.978459 | 1.386389         |
| 837 | 4    | 64    | 1     | 100.00            | 0.982188      | 0.978459 | 1.386389         |
| 838 | 6    | 4     | 1     | 100.00            | 0.982188      | 0.978245 | 1.386239         |
| 839 | 7    | 10.9  | 1     | 100.00            | 0.984733      | 0.975629 | 1.386200         |
| 840 | 7    | 9.8   | 1     | 100.00            | 0.984733      | 0.975494 | 1.386105         |
| 841 | 7    | 10    | 1     | 100.00            | 0.984733      | 0.975481 | 1.386096         |
| 842 | 7    | 9.6   | 1     | 100.00            | 0.984733      | 0.975481 | 1.386096         |
| 843 | 8    | 8.2   | 1     | 99.77             | 0.984733      | 0.975481 | 1.386096         |
| 844 | 7    | 9.5   | 1     | 100.00            | 0.984733      | 0.975461 | 1.386082         |
| 845 | 68   | 0.5   | 1     | 98.85             | 0.977099      | 0.983101 | 1.386078         |
| 846 | 7    | 10.1  | 1     | 100.00            | 0.984733      | 0.975442 | 1.386068         |
| 847 | 7    | 9.9   | 1     | 100.00            | 0.984733      | 0.975442 | 1.386068         |
| 848 | 7    | 10.5  | 1     | 100.00            | 0.984733      | 0.975435 | 1.386064         |
| 849 | 7    | 9.7   | 1     | 100.00            | 0.984733      | 0.975435 | 1.386064         |
| 850 | 7    | 10.3  | 1     | 100.00            | 0.984733      | 0.975435 | 1.386064         |
| 851 | 1    | 1     | 1     | 99.31             | 0.974555      | 0.985594 | 1.386056         |
| 852 | 7    | 10.6  | 1     | 100.00            | 0.984733      | 0.975416 | 1.386050         |
| 853 | 7    | 10.2  | 1     | 100.00            | 0.984733      | 0.975403 | 1.386041         |
| 854 | 7    | 10.4  | 1     | 100.00            | 0.984733      | 0.975403 | 1.386041         |
| 855 | 7    | 10.7  | 1     | 100.00            | 0.984733      | 0.975383 | 1.386027         |
| 856 | 1    | 2     | 1     | 99.54             | 0.979644      | 0.980460 | 1.386002         |
| 857 | 7    | 9.4   | 1     | 100.00            | 0.984733      | 0.975345 | 1.386000         |
| 858 | 7    | 9.3   | 1     | 100.00            | 0.984733      | 0.975280 | 1.385954         |
| 859 | 1    | 7     | 1     | 100.00            | 0.977099      | 0.982875 | 1.385917         |
| 860 | 59   | 0.5   | 1     | 98.85             | 0.977099      | 0.982700 | 1.385793         |
| 861 | 5    | 12    | 1     | 100.00            | 0.984733      | 0.975027 | 1.385777         |
| 862 | 7    | 9.2   | 1     | 100.00            | 0.984733      | 0.975008 | 1.385763         |
| 863 | 10   | 128   | 1     | 100.00            | 0.982188      | 0.977540 | 1.385741         |
| 864 | 10   | 2048  | 1     | 100.00            | 0.982188      | 0.977540 | 1.385741         |
| 865 | 10   | 32768 | 1     | 100.00            | 0.982188      | 0.977540 | 1.385741         |
| 866 | 10   | 512   | 1     | 100.00            | 0.982188      | 0.977540 | 1.385741         |
| 867 | 10   | 8192  | 1     | 100.00            | 0.982188      | 0.977540 | 1.385741         |
| 868 | 10   | 64    | 1     | 100.00            | 0.982188      | 0.977540 | 1.385741         |
| 869 | 7    | 9     | 1     | 100.00            | 0.984733      | 0.974937 | 1.385713         |
| 870 | 7    | 8.7   | 1     | 100.00            | 0.984733      | 0.974937 | 1.385713         |
| 871 | 7    | 9.1   | 1     | 100.00            | 0.984733      | 0.974937 | 1.385713         |
| 872 | 7    | 8.9   | 1     | 100.00            | 0.984733      | 0.974930 | 1.385708         |
| 873 | 7    | 8.8   | 1     | 100.00            | 0.984733      | 0.974917 | 1.385699         |
| 874 | 7    | 8.6   | 1     | 100.00            | 0.984733      | 0.974898 | 1.385686         |
| 875 | 7    | 10.8  | 1     | 100.00            | 0.984733      | 0.974872 | 1.385667         |
| 876 | 7    | 8.5   | 1     | 100.00            | 0.984733      | 0.974794 | 1.385613         |
| 877 | 1    | 13    | 1     | 100.00            | 0.979644      | 0.979844 | 1.385567         |
| 878 | 7    | 8.4   | 1     | 99.77             | 0.984733      | 0.974710 | 1.385554         |
| 879 | 7    | 8.3   | 1     | 99.77             | 0.984733      | 0.974607 | 1.385481         |
| 880 | 7    | 8.2   | 1     | 99.77             | 0.984733      | 0.974483 | 1.385394         |
| 881 | 8    | 7     | 1     | 100.00            | 0.982188      | 0.977041 | 1.385389         |
| 882 | 961  | 0.5   | 1     | 98.85             | 0.977099      | 0.982104 | 1.385371         |
| 883 | 1    | 14    | 1     | 100.00            | 0.979644      | 0.979378 | 1.385238         |
| 884 | 7    | 8.1   | 1     | 99.77             | 0.984733      | 0.974205 | 1.385198         |

**Supplementary Table 5.** Continued.

| No. | Seed | Cost  | Gamma | Training_Accuracy | Test_Accuracy | Test_AUC | Euclidean length |
|-----|------|-------|-------|-------------------|---------------|----------|------------------|
| 885 | 7    | 8     | 1     | 100.00            | 0.984733      | 0.974043 | 1.385084         |
| 886 | 5    | 13    | 1     | 100.00            | 0.984733      | 0.973953 | 1.385021         |
| 887 | 1    | 32    | 1     | 100.00            | 0.979644      | 0.978899 | 1.384899         |
| 888 | 7    | 12    | 1     | 100.00            | 0.982188      | 0.976316 | 1.384878         |
| 889 | 7    | 14    | 1     | 100.00            | 0.982188      | 0.976290 | 1.384859         |
| 890 | 1    | 16    | 1     | 100.00            | 0.979644      | 0.978834 | 1.384853         |
| 891 | 1    | 15    | 1     | 100.00            | 0.979644      | 0.978834 | 1.384853         |
| 892 | 5    | 16    | 1     | 100.00            | 0.984733      | 0.973713 | 1.384852         |
| 893 | 7    | 13    | 1     | 100.00            | 0.982188      | 0.976219 | 1.384809         |
| 894 | 5    | 15    | 1     | 100.00            | 0.984733      | 0.973532 | 1.384725         |
| 895 | 7    | 15    | 1     | 100.00            | 0.982188      | 0.976057 | 1.384695         |
| 896 | 7    | 16    | 1     | 100.00            | 0.982188      | 0.975791 | 1.384508         |
| 897 | 5    | 14    | 1     | 100.00            | 0.984733      | 0.973137 | 1.384447         |
| 898 | 7    | 11    | 1     | 100.00            | 0.984733      | 0.973111 | 1.384429         |
| 899 | 6    | 6     | 1     | 100.00            | 0.979644      | 0.978077 | 1.384318         |
| 900 | 4    | 1     | 1     | 99.31             | 0.979644      | 0.977922 | 1.384208         |
| 901 | 7    | 32    | 1     | 100.00            | 0.982188      | 0.975312 | 1.384170         |
| 902 | 6    | 5     | 1     | 100.00            | 0.979644      | 0.977734 | 1.384076         |
| 903 | 5    | 4     | 1     | 100.00            | 0.984733      | 0.972295 | 1.383856         |
| 904 | 1    | 12    | 1     | 100.00            | 0.979644      | 0.977287 | 1.383760         |
| 905 | 6    | 7     | 1     | 100.00            | 0.979644      | 0.977242 | 1.383728         |
| 906 | 7    | 4     | 1     | 100.00            | 0.982188      | 0.974581 | 1.383655         |
| 907 | 7    | 2     | 1     | 99.54             | 0.982188      | 0.974574 | 1.383650         |
| 908 | 8    | 5     | 1     | 100.00            | 0.979644      | 0.977119 | 1.383641         |
| 909 | 1    | 0.5   | 1     | 99.31             | 0.979644      | 0.976996 | 1.383554         |
| 910 | 2    | 0.5   | 1     | 98.85             | 0.977099      | 0.979126 | 1.383261         |
| 911 | 8    | 6     | 1     | 100.00            | 0.979644      | 0.976322 | 1.383079         |
| 912 | 6    | 1     | 1     | 99.31             | 0.979644      | 0.976258 | 1.383033         |
| 913 | 686  | 0.5   | 1     | 98.85             | 0.977099      | 0.978757 | 1.383000         |
| 914 | 5    | 32    | 1     | 100.00            | 0.984733      | 0.971000 | 1.382946         |
| 915 | 5    | 128   | 1     | 100.00            | 0.984733      | 0.970838 | 1.382832         |
| 916 | 5    | 2048  | 1     | 100.00            | 0.984733      | 0.970838 | 1.382832         |
| 917 | 5    | 32768 | 1     | 100.00            | 0.984733      | 0.970838 | 1.382832         |
| 918 | 5    | 512   | 1     | 100.00            | 0.984733      | 0.970838 | 1.382832         |
| 919 | 5    | 8192  | 1     | 100.00            | 0.984733      | 0.970838 | 1.382832         |
| 920 | 5    | 64    | 1     | 100.00            | 0.984733      | 0.970838 | 1.382832         |
| 921 | 5    | 2     | 1     | 99.54             | 0.984733      | 0.970139 | 1.382342         |
| 922 | 5    | 7     | 1     | 100.00            | 0.984733      | 0.970055 | 1.382283         |
| 923 | 1    | 128   | 1     | 100.00            | 0.977099      | 0.977468 | 1.382088         |
| 924 | 1    | 2048  | 1     | 100.00            | 0.977099      | 0.977468 | 1.382088         |
| 925 | 1    | 32768 | 1     | 100.00            | 0.977099      | 0.977468 | 1.382088         |
| 926 | 1    | 512   | 1     | 100.00            | 0.977099      | 0.977468 | 1.382088         |
| 927 | 1    | 8192  | 1     | 100.00            | 0.977099      | 0.977468 | 1.382088         |
| 928 | 1    | 64    | 1     | 100.00            | 0.977099      | 0.977468 | 1.382088         |
| 929 | 932  | 0.5   | 1     | 98.85             | 0.974555      | 0.979967 | 1.382061         |
| 930 | 7    | 128   | 1     | 100.00            | 0.979644      | 0.974024 | 1.381457         |
| 931 | 7    | 2048  | 1     | 100.00            | 0.979644      | 0.974024 | 1.381457         |
| 932 | 7    | 32768 | 1     | 100.00            | 0.979644      | 0.974024 | 1.381457         |
| 933 | 7    | 512   | 1     | 100.00            | 0.979644      | 0.974024 | 1.381457         |
| 934 | 7    | 8192  | 1     | 100.00            | 0.979644      | 0.974024 | 1.381457         |
| 935 | 7    | 64    | 1     | 100.00            | 0.979644      | 0.974024 | 1.381457         |
| 936 | 10   | 0.5   | 1     | 98.85             | 0.977099      | 0.976348 | 1.381296         |



**Supplementary Table 5.** Continued.

| No. | Seed | Cost   | Gamma | Training_Accuracy | Test_Accuracy | Test_AUC | Euclidean length |
|-----|------|--------|-------|-------------------|---------------|----------|------------------|
| 937 | 5    | 5      | 1     | 100.00            | 0.982188      | 0.970884 | 1.381054         |
| 938 | 5    | 6      | 1     | 100.00            | 0.982188      | 0.970676 | 1.380908         |
| 939 | 7    | 7      | 1     | 100.00            | 0.982188      | 0.970657 | 1.380894         |
| 940 | 8    | 1      | 1     | 99.31             | 0.979644      | 0.972955 | 1.380704         |
| 941 | 7    | 5      | 1     | 100.00            | 0.979644      | 0.972800 | 1.380595         |
| 942 | 9    | 0.5    | 1     | 98.85             | 0.977099      | 0.973402 | 1.379215         |
| 943 | 7    | 6      | 1     | 100.00            | 0.979644      | 0.970832 | 1.379209         |
| 944 | 59   | 0.125  | 1     | 97.46             | 0.959288      | 0.990003 | 1.378528         |
| 945 | 5    | 1      | 1     | 99.31             | 0.982188      | 0.964791 | 1.376777         |
| 946 | 7    | 1      | 1     | 99.31             | 0.979644      | 0.966876 | 1.376427         |
| 947 | 4    | 0.5    | 1     | 98.85             | 0.974555      | 0.971932 | 1.376376         |
| 948 | 686  | 0.125  | 1     | 97.46             | 0.959288      | 0.986876 | 1.376284         |
| 949 | 932  | 0.125  | 1     | 97.46             | 0.959288      | 0.986442 | 1.375973         |
| 950 | 649  | 0.125  | 1     | 97.46             | 0.956743      | 0.988825 | 1.375911         |
| 951 | 7    | 0.5    | 1     | 98.85             | 0.977099      | 0.967497 | 1.375054         |
| 952 | 158  | 0.125  | 1     | 97.69             | 0.956743      | 0.985846 | 1.373772         |
| 953 | 649  | 0.0313 | 1     | 96.54             | 0.949109      | 0.992897 | 1.373555         |
| 954 | 435  | 0.125  | 1     | 97.69             | 0.956743      | 0.985497 | 1.373521         |
| 955 | 9    | 0.125  | 1     | 97.46             | 0.956743      | 0.984338 | 1.372690         |
| 956 | 961  | 0.125  | 1     | 97.46             | 0.956743      | 0.982674 | 1.371497         |
| 957 | 352  | 0.125  | 1     | 97.46             | 0.956743      | 0.982318 | 1.371242         |
| 958 | 59   | 0.0313 | 1     | 96.54             | 0.949109      | 0.989634 | 1.371198         |
| 959 | 68   | 0.125  | 1     | 97.69             | 0.951654      | 0.987135 | 1.371160         |
| 960 | 183  | 0.125  | 1     | 97.23             | 0.956743      | 0.982065 | 1.371061         |
| 961 | 3    | 11     | 1     | 100.00            | 0.984733      | 0.951142 | 1.369077         |
| 962 | 932  | 0.0313 | 1     | 96.54             | 0.949109      | 0.986649 | 1.369045         |
| 963 | 3    | 10.4   | 1     | 100.00            | 0.984733      | 0.950599 | 1.368699         |
| 964 | 5    | 0.5    | 1     | 98.85             | 0.979644      | 0.955688 | 1.368591         |
| 965 | 3    | 10.3   | 1     | 100.00            | 0.984733      | 0.950437 | 1.368586         |
| 966 | 961  | 0.0313 | 1     | 96.54             | 0.949109      | 0.985989 | 1.368570         |
| 967 | 3    | 10.2   | 1     | 100.00            | 0.984733      | 0.950359 | 1.368532         |
| 968 | 3    | 10.1   | 1     | 100.00            | 0.984733      | 0.950236 | 1.368447         |
| 969 | 3    | 10     | 1     | 100.00            | 0.984733      | 0.950145 | 1.368384         |
| 970 | 3    | 9.9    | 1     | 100.00            | 0.984733      | 0.950042 | 1.368312         |
| 971 | 3    | 9.8    | 1     | 100.00            | 0.984733      | 0.949886 | 1.368204         |
| 972 | 3    | 9.7    | 1     | 100.00            | 0.984733      | 0.949750 | 1.368110         |
| 973 | 3    | 9.6    | 1     | 100.00            | 0.984733      | 0.949601 | 1.368006         |
| 974 | 68   | 0.0313 | 1     | 96.54             | 0.949109      | 0.985134 | 1.367954         |
| 975 | 3    | 9.5    | 1     | 100.00            | 0.984733      | 0.949485 | 1.367926         |
| 976 | 435  | 0.0313 | 1     | 96.54             | 0.949109      | 0.985044 | 1.367889         |
| 977 | 3    | 9.4    | 1     | 100.00            | 0.984733      | 0.949343 | 1.367827         |
| 978 | 3    | 12     | 1     | 100.00            | 0.982188      | 0.951952 | 1.367811         |
| 979 | 3    | 13     | 1     | 100.00            | 0.982188      | 0.951848 | 1.367739         |
| 980 | 3    | 9.3    | 1     | 100.00            | 0.984733      | 0.949116 | 1.367669         |
| 981 | 3    | 8.7    | 1     | 100.00            | 0.984733      | 0.949025 | 1.367607         |
| 982 | 3    | 8.8    | 1     | 100.00            | 0.984733      | 0.949019 | 1.367602         |
| 983 | 8    | 0.5    | 1     | 98.85             | 0.977099      | 0.956872 | 1.367599         |
| 984 | 3    | 8.5    | 1     | 100.00            | 0.984733      | 0.948993 | 1.367584         |
| 985 | 3    | 8.6    | 1     | 100.00            | 0.984733      | 0.948986 | 1.367580         |
| 986 | 1    | 0.125  | 1     | 97.69             | 0.956743      | 0.977196 | 1.367578         |
| 987 | 3    | 8.9    | 1     | 100.00            | 0.984733      | 0.948967 | 1.367566         |
| 988 | 3    | 9.2    | 1     | 100.00            | 0.984733      | 0.948941 | 1.367548         |

**Supplementary Table 5. Continued.**

| No.  | Seed | Cost   | Gamma | Training_Accuracy | Test_Accuracy | Test_AUC | Euclidean length |
|------|------|--------|-------|-------------------|---------------|----------|------------------|
| 989  | 3    | 9      | 1     | 100.00            | 0.984733      | 0.948935 | 1.367544         |
| 990  | 3    | 9.1    | 1     | 100.00            | 0.984733      | 0.948863 | 1.367494         |
| 991  | 3    | 8.4    | 1     | 100.00            | 0.984733      | 0.948863 | 1.367494         |
| 992  | 3    | 8.3    | 1     | 100.00            | 0.984733      | 0.948799 | 1.367449         |
| 993  | 3    | 14     | 1     | 100.00            | 0.982188      | 0.951272 | 1.367338         |
| 994  | 3    | 10.9   | 1     | 100.00            | 0.984733      | 0.948514 | 1.367252         |
| 995  | 3    | 10.8   | 1     | 100.00            | 0.984733      | 0.948423 | 1.367189         |
| 996  | 3    | 8.1    | 1     | 100.00            | 0.984733      | 0.948365 | 1.367148         |
| 997  | 3    | 10.7   | 1     | 100.00            | 0.984733      | 0.948287 | 1.367094         |
| 998  | 3    | 8      | 1     | 100.00            | 0.984733      | 0.948274 | 1.367085         |
| 999  | 3    | 10.6   | 1     | 100.00            | 0.984733      | 0.948235 | 1.367059         |
| 1000 | 3    | 10.5   | 1     | 100.00            | 0.984733      | 0.948203 | 1.367036         |
| 1001 | 3    | 15     | 1     | 100.00            | 0.982188      | 0.950838 | 1.367036         |
| 1002 | 158  | 0.0313 | 1     | 96.77             | 0.949109      | 0.983593 | 1.366845         |
| 1003 | 3    | 16     | 1     | 100.00            | 0.982188      | 0.950378 | 1.366716         |
| 1004 | 6    | 0.125  | 1     | 97.69             | 0.956743      | 0.975429 | 1.366316         |
| 1005 | 3    | 8.2    | 1     | 100.00            | 0.984733      | 0.947089 | 1.366264         |
| 1006 | 9    | 0.0313 | 1     | 96.54             | 0.949109      | 0.982441 | 1.366016         |
| 1007 | 352  | 0.0313 | 1     | 96.54             | 0.949109      | 0.982085 | 1.365760         |
| 1008 | 3    | 32     | 1     | 100.00            | 0.982188      | 0.948067 | 1.365110         |
| 1009 | 3    | 4      | 1     | 100.00            | 0.982188      | 0.947918 | 1.365006         |
| 1010 | 3    | 2      | 1     | 99.77             | 0.982188      | 0.947193 | 1.364503         |
| 1011 | 1    | 0.0313 | 1     | 96.54             | 0.949109      | 0.979793 | 1.364112         |
| 1012 | 3    | 5      | 1     | 100.00            | 0.979644      | 0.948617 | 1.363663         |
| 1013 | 3    | 128    | 1     | 100.00            | 0.979644      | 0.947297 | 1.362745         |
| 1014 | 3    | 2048   | 1     | 100.00            | 0.979644      | 0.947297 | 1.362745         |
| 1015 | 3    | 32768  | 1     | 100.00            | 0.979644      | 0.947297 | 1.362745         |
| 1016 | 3    | 512    | 1     | 100.00            | 0.979644      | 0.947297 | 1.362745         |
| 1017 | 3    | 8192   | 1     | 100.00            | 0.979644      | 0.947297 | 1.362745         |
| 1018 | 3    | 64     | 1     | 100.00            | 0.979644      | 0.947297 | 1.362745         |
| 1019 | 3    | 6      | 1     | 100.00            | 0.979644      | 0.946597 | 1.362259         |
| 1020 | 6    | 0.0313 | 1     | 96.54             | 0.949109      | 0.976406 | 1.361682         |
| 1021 | 3    | 7      | 1     | 100.00            | 0.979644      | 0.945574 | 1.361548         |
| 1022 | 686  | 0.0313 | 1     | 96.54             | 0.949109      | 0.976115 | 1.361473         |
| 1023 | 6    | 0.5    | 1     | 98.85             | 0.974555      | 0.949750 | 1.360802         |
| 1024 | 183  | 0.0313 | 1     | 96.54             | 0.949109      | 0.972755 | 1.359066         |
| 1025 | 2    | 0.0313 | 1     | 96.54             | 0.949109      | 0.968902 | 1.356311         |
| 1026 | 10   | 0.125  | 1     | 97.69             | 0.954198      | 0.963263 | 1.355865         |
| 1027 | 2    | 0.125  | 1     | 97.69             | 0.954198      | 0.963133 | 1.355773         |
| 1028 | 4    | 0.0313 | 1     | 96.54             | 0.949109      | 0.966079 | 1.354296         |
| 1029 | 4    | 0.125  | 1     | 97.69             | 0.951654      | 0.963515 | 1.354255         |
| 1030 | 3    | 1      | 1     | 99.31             | 0.979644      | 0.932839 | 1.352734         |
| 1031 | 8    | 0.125  | 1     | 97.69             | 0.959288      | 0.951570 | 1.351191         |
| 1032 | 3    | 0.5    | 1     | 99.08             | 0.977099      | 0.922253 | 1.343604         |
| 1033 | 8    | 0.0313 | 1     | 96.54             | 0.949109      | 0.948222 | 1.341616         |
| 1034 | 5    | 0.125  | 1     | 97.69             | 0.959288      | 0.937326 | 1.341198         |
| 1035 | 10   | 0.0313 | 1     | 96.77             | 0.949109      | 0.942959 | 1.337901         |
| 1036 | 5    | 0.0313 | 1     | 96.77             | 0.946565      | 0.942751 | 1.335951         |
| 1037 | 7    | 0.125  | 1     | 97.46             | 0.959288      | 0.928857 | 1.335293         |
| 1038 | 7    | 0.0313 | 1     | 96.77             | 0.949109      | 0.938899 | 1.335043         |
| 1039 | 3    | 0.125  | 1     | 97.46             | 0.956743      | 0.846843 | 1.277693         |
| 1040 | 3    | 0.0313 | 1     | 96.77             | 0.949109      | 0.821359 | 1.255165         |

**Supplementary Table 6.** Glycopeptide spectrum matches of alpha-1-acid glycoprotein and immunoglobulin gamma, and their Classification as training set for machine learning.

| No. | Experiment | CID Scan No. | N-glycoproteins             | N-glycopeptides | Manual Classification | SVM            |         |        | DNN            |        |        |
|-----|------------|--------------|-----------------------------|-----------------|-----------------------|----------------|---------|--------|----------------|--------|--------|
|     |            |              |                             |                 |                       | Classification | Pscore  | FDR    | Classification | Pscore | FDR    |
| 1   | AGP exp_2  | 2144         | Alpha-1-acid glycoprotein 1 | ENGTISR_4_4_0_1 | None                  | None           | 2.0470  | 0.0000 | None           | 7.2812 | 0.0000 |
| 2   | AGP exp_1  | 2066         | Alpha-1-acid glycoprotein 1 | ENGTISR_4_4_0_1 | None                  | None           | 3.1075  | 0.0000 | None           | 7.3278 | 0.0000 |
| 3   | AGP exp_2  | 3657         | Alpha-1-acid glycoprotein 1 | ENGTISR_5_4_0_2 | None                  | None           | 3.7596  | 0.0000 | None           | 7.2751 | 0.0000 |
| 4   | AGP exp_2  | 3691         | Alpha-1-acid glycoprotein 1 | ENGTISR_5_4_0_2 | None                  | None           | 2.9977  | 0.0000 | None           | 7.2835 | 0.0000 |
| 5   | AGP exp_1  | 3850         | Alpha-1-acid glycoprotein 1 | ENGTISR_5_4_0_2 | None                  | None           | 3.4573  | 0.0000 | None           | 7.2803 | 0.0000 |
| 6   | AGP exp_1  | 2127         | Alpha-1-acid glycoprotein 1 | ENGTISR_6_5_0_1 | None                  | None           | 2.8861  | 0.0000 | None           | 7.3128 | 0.0000 |
| 7   | AGP exp_1  | 2266         | Alpha-1-acid glycoprotein 1 | ENGTISR_6_5_0_1 | None                  | None           | 2.2163  | 0.0000 | None           | 7.2881 | 0.0000 |
| 8   | AGP exp_1  | 2368         | Alpha-1-acid glycoprotein 1 | ENGTISR_6_5_0_1 | None                  | None           | 3.0071  | 0.0000 | None           | 7.2944 | 0.0000 |
| 9   | AGP exp_2  | 2404         | Alpha-1-acid glycoprotein 1 | ENGTISR_6_5_0_1 | None                  | None           | 2.0328  | 0.0000 | None           | 7.2386 | 0.0000 |
| 10  | AGP exp_2  | 2273         | Alpha-1-acid glycoprotein 1 | ENGTISR_6_5_0_1 | None                  | None           | 2.5824  | 0.0000 | None           | 7.2568 | 0.0000 |
| 11  | AGP exp_2  | 2122         | Alpha-1-acid glycoprotein 1 | ENGTISR_6_5_0_1 | None                  | None           | 2.7635  | 0.0000 | None           | 7.2543 | 0.0000 |
| 12  | AGP exp_2  | 3604         | Alpha-1-acid glycoprotein 1 | ENGTISR_6_5_0_2 | None                  | None           | 2.9080  | 0.0000 | None           | 7.2693 | 0.0000 |
| 13  | AGP exp_1  | 4033         | Alpha-1-acid glycoprotein 1 | ENGTISR_6_5_0_2 | None                  | None           | 2.7842  | 0.0000 | None           | 7.2731 | 0.0000 |
| 14  | AGP exp_2  | 3938         | Alpha-1-acid glycoprotein 1 | ENGTISR_6_5_0_2 | None                  | None           | 3.0706  | 0.0000 | None           | 7.3049 | 0.0000 |
| 15  | AGP exp_1  | 3756         | Alpha-1-acid glycoprotein 1 | ENGTISR_6_5_0_2 | None                  | None           | 2.8261  | 0.0000 | None           | 7.3042 | 0.0000 |
| 16  | AGP exp_2  | 3776         | Alpha-1-acid glycoprotein 1 | ENGTISR_6_5_0_2 | None                  | None           | 2.4268  | 0.0000 | None           | 7.0517 | 0.0000 |
| 17  | AGP exp_1  | 4838         | Alpha-1-acid glycoprotein 1 | ENGTISR_6_5_0_3 | None                  | None           | 2.5843  | 0.0000 | None           | 7.1635 | 0.0000 |
| 18  | AGP exp_1  | 4749         | Alpha-1-acid glycoprotein 1 | ENGTISR_6_5_0_3 | None                  | None           | 1.8795  | 0.0000 | None           | 7.2669 | 0.0000 |
| 19  | AGP exp_2  | 6210         | Alpha-1-acid glycoprotein 1 | ENGTISR_6_5_0_3 | None                  | None           | 2.2721  | 0.0000 | None           | 7.2579 | 0.0000 |
| 20  | AGP exp_1  | 5085         | Alpha-1-acid glycoprotein 1 | ENGTISR_6_5_0_3 | None                  | None           | 2.2833  | 0.0000 | None           | 7.2721 | 0.0000 |
| 21  | AGP exp_2  | 2248         | Alpha-1-acid glycoprotein 1 | ENGTISR_6_5_1_1 | Outer                 | Outer          | 4.0481  | 0.0000 | Outer          | 6.7230 | 0.0000 |
| 22  | AGP exp_1  | 2178         | Alpha-1-acid glycoprotein 1 | ENGTISR_6_5_1_1 | Outer                 | Outer          | 3.0794  | 0.0000 | Outer          | 6.7378 | 0.0000 |
| 23  | AGP exp_1  | 2305         | Alpha-1-acid glycoprotein 1 | ENGTISR_6_5_1_1 | Outer                 | Outer          | 2.1624  | 0.0000 | Outer          | 6.5095 | 0.0000 |
| 24  | AGP exp_1  | 2013         | Alpha-1-acid glycoprotein 1 | ENGTISR_6_5_1_1 | Outer                 | Outer          | 13.5106 | 0.0000 | Outer          | 6.7122 | 0.0000 |
| 25  | AGP exp_1  | 3643         | Alpha-1-acid glycoprotein 1 | ENGTISR_6_5_1_2 | Outer                 | Outer          | 4.1116  | 0.0000 | Outer          | 6.5520 | 0.0000 |
| 26  | AGP exp_1  | 3953         | Alpha-1-acid glycoprotein 1 | ENGTISR_6_5_1_2 | Outer                 | Outer          | 1.3418  | 0.0025 | Outer          | 6.0368 | 0.0073 |
| 27  | AGP exp_2  | 3502         | Alpha-1-acid glycoprotein 1 | ENGTISR_6_5_1_2 | Outer                 | Outer          | 3.9507  | 0.0000 | Outer          | 6.7428 | 0.0000 |
| 28  | AGP exp_2  | 3805         | Alpha-1-acid glycoprotein 1 | ENGTISR_6_5_1_2 | Outer                 | Outer          | 5.0611  | 0.0000 | Outer          | 6.7192 | 0.0000 |
| 29  | AGP exp_2  | 4775         | Alpha-1-acid glycoprotein 1 | ENGTISR_6_5_1_3 | Outer                 | Outer          | 3.5884  | 0.0000 | Outer          | 6.1466 | 0.0050 |

**Supplementary Table 6. Continued.**

| No. | Experiment | CID Scan No. | N-glycoproteins             | N-glycopeptides | Manual Classification | SVM            |        |        | DNN            |        |        |
|-----|------------|--------------|-----------------------------|-----------------|-----------------------|----------------|--------|--------|----------------|--------|--------|
|     |            |              |                             |                 |                       | Classification | Pscore | FDR    | Classification | Pscore | FDR    |
| 30  | AGP exp_1  | 4665         | Alpha-1-acid glycoprotein 1 | ENGTISR_6_5_1_3 | Outer                 | Outer          | 2.8247 | 0.0000 | Outer          | 6.5837 | 0.0000 |
| 31  | AGP exp_36 | 9466         | Alpha-1-acid glycoprotein 1 | ENGTISR_6_5_2_3 | Dual                  | Dual           | 1.9269 | 0.0000 | Dual           | 6.2293 | 0.0052 |
| 32  | AGP exp_21 | 10181        | Alpha-1-acid glycoprotein 1 | ENGTISR_6_5_2_3 | Dual                  | Dual           | 1.3228 | 0.0025 | Dual           | 6.1682 | 0.0050 |
| 33  | AGP exp_26 | 7877         | Alpha-1-acid glycoprotein 1 | ENGTISR_6_5_2_3 | Dual                  | Dual           | 2.3879 | 0.0000 | Dual           | 6.1675 | 0.0050 |
| 34  | AGP exp_19 | 9470         | Alpha-1-acid glycoprotein 1 | ENGTISR_6_5_2_3 | Dual                  | Dual           | 5.0930 | 0.0000 | Dual           | 6.2594 | 0.0054 |
| 35  | AGP exp_7  | 8661         | Alpha-1-acid glycoprotein 1 | ENGTISR_6_5_2_3 | Dual                  | Dual           | 3.8206 | 0.0000 | Dual           | 6.2088 | 0.0052 |
| 36  | AGP exp_22 | 10476        | Alpha-1-acid glycoprotein 1 | ENGTISR_6_5_2_3 | Dual                  | Dual           | 4.9179 | 0.0000 | Dual           | 6.2208 | 0.0052 |
| 37  | AGP exp_28 | 13182        | Alpha-1-acid glycoprotein 1 | ENGTISR_6_5_2_3 | Dual                  | Dual           | 2.2269 | 0.0000 | Dual           | 6.1942 | 0.0051 |
| 38  | AGP exp_33 | 9926         | Alpha-1-acid glycoprotein 1 | ENGTISR_6_5_2_3 | Dual                  | Dual           | 1.5123 | 0.0025 | Dual           | 6.1821 | 0.0051 |
| 39  | AGP exp_17 | 9707         | Alpha-1-acid glycoprotein 1 | ENGTISR_6_5_2_3 | Dual                  | Dual           | 1.1031 | 0.0072 | Dual           | 6.1809 | 0.0051 |
| 40  | AGP exp_15 | 9678         | Alpha-1-acid glycoprotein 1 | ENGTISR_6_5_2_3 | Dual                  | Dual           | 4.0010 | 0.0000 | Dual           | 6.1835 | 0.0051 |
| 41  | AGP exp_16 | 9689         | Alpha-1-acid glycoprotein 1 | ENGTISR_6_5_2_3 | Dual                  | Dual           | 6.0129 | 0.0000 | Dual           | 6.2612 | 0.0054 |
| 42  | AGP exp_32 | 9793         | Alpha-1-acid glycoprotein 1 | ENGTISR_6_5_2_3 | Dual                  | Dual           | 5.4069 | 0.0000 | Dual           | 6.2588 | 0.0053 |
| 43  | AGP exp_23 | 10331        | Alpha-1-acid glycoprotein 1 | ENGTISR_6_5_2_3 | Dual                  | Dual           | 0.9816 | 0.0071 | Dual           | 5.5412 | 0.0094 |
| 44  | AGP exp_27 | 6869         | Alpha-1-acid glycoprotein 1 | ENGTISR_6_5_2_3 | Dual                  | Dual           | 1.3186 | 0.0025 | Dual           | 6.0767 | 0.0049 |
| 45  | AGP exp_31 | 10109        | Alpha-1-acid glycoprotein 1 | ENGTISR_6_5_2_3 | Dual                  | Dual           | 5.3473 | 0.0000 | Dual           | 6.3721 | 0.0056 |
| 46  | AGP exp_11 | 11998        | Alpha-1-acid glycoprotein 1 | ENGTISR_6_5_2_3 | Dual                  | Dual           | 2.9560 | 0.0000 | Dual           | 6.0967 | 0.0049 |
| 47  | AGP exp_1  | 4751         | Alpha-1-acid glycoprotein 1 | ENGTISR_6_5_2_3 | Outer                 | Outer          | 2.0323 | 0.0000 | Outer          | 6.3802 | 0.0056 |
| 48  | AGP exp_8  | 8629         | Alpha-1-acid glycoprotein 1 | ENGTISR_6_5_2_3 | Dual                  | Dual           | 2.1533 | 0.0000 | Dual           | 6.1632 | 0.0050 |
| 49  | AGP exp_28 | 8034         | Alpha-1-acid glycoprotein 1 | ENGTISR_6_5_2_3 | Dual                  | Dual           | 4.3588 | 0.0000 | Dual           | 6.2081 | 0.0052 |
| 50  | AGP exp_10 | 10883        | Alpha-1-acid glycoprotein 1 | ENGTISR_6_5_2_3 | Dual                  | Dual           | 2.9806 | 0.0000 | Dual           | 6.1987 | 0.0051 |
| 51  | AGP exp_23 | 10629        | Alpha-1-acid glycoprotein 1 | ENGTISR_6_5_2_3 | Dual                  | Dual           | 3.6935 | 0.0000 | Dual           | 6.1959 | 0.0051 |
| 52  | AGP exp_33 | 10185        | Alpha-1-acid glycoprotein 1 | ENGTISR_6_5_2_3 | Dual                  | Dual           | 5.8750 | 0.0000 | Dual           | 6.2033 | 0.0052 |
| 53  | AGP exp_14 | 12458        | Alpha-1-acid glycoprotein 1 | ENGTISR_6_5_2_3 | Dual                  | Dual           | 1.7488 | 0.0000 | Dual           | 5.7592 | 0.0095 |
| 54  | AGP exp_34 | 9940         | Alpha-1-acid glycoprotein 1 | ENGTISR_6_5_2_3 | Dual                  | Dual           | 4.1570 | 0.0000 | Dual           | 6.4062 | 0.0057 |
| 55  | AGP exp_18 | 10302        | Alpha-1-acid glycoprotein 1 | ENGTISR_6_5_2_3 | Dual                  | Dual           | 9.0683 | 0.0000 | Dual           | 6.3362 | 0.0055 |
| 56  | AGP exp_13 | 12345        | Alpha-1-acid glycoprotein 1 | ENGTISR_6_5_2_3 | Dual                  | Dual           | 5.5343 | 0.0000 | Dual           | 6.2574 | 0.0053 |
| 57  | AGP exp_2  | 4761         | Alpha-1-acid glycoprotein 1 | ENGTISR_6_5_2_3 | Dual                  | Dual           | 0.1396 | 0.3864 | Dual           | 5.7051 | 0.0095 |
| 58  | AGP exp_2  | 4640         | Alpha-1-acid glycoprotein 1 | ENGTISR_7_6_0_3 | None                  | None           | 1.8454 | 0.0000 | None           | 7.2318 | 0.0000 |
| 59  | AGP exp_2  | 2168         | Alpha-1-acid glycoprotein 1 | ENGTISR_7_6_1_1 | Outer                 | Outer          | 5.4799 | 0.0000 | Outer          | 6.7090 | 0.0000 |

**Supplementary Table 6. Continued.**

| No. | Experiment | CID Scan No. | N-glycoproteins             | N-glycopeptides           | Manual Classification | SVM            |        |        | DNN            |        |        |
|-----|------------|--------------|-----------------------------|---------------------------|-----------------------|----------------|--------|--------|----------------|--------|--------|
|     |            |              |                             |                           |                       | Classification | Pscore | FDR    | Classification | Pscore | FDR    |
| 60  | AGP exp_1  | 3674         | Alpha-1-acid glycoprotein 1 | ENGTISR_7_6_1_2           | Outer                 | Outer          | 1.3460 | 0.0025 | Outer          | 6.6105 | 0.0000 |
| 61  | AGP exp_2  | 3280         | Alpha-1-acid glycoprotein 1 | ENGTISR_7_6_1_2           | Outer                 | Outer          | 2.4372 | 0.0000 | Outer          | 6.5841 | 0.0000 |
| 62  | AGP exp_2  | 3574         | Alpha-1-acid glycoprotein 1 | ENGTISR_7_6_1_2           | Outer                 | Outer          | 1.4963 | 0.0025 | Outer          | 6.6847 | 0.0000 |
| 63  | AGP exp_2  | 2931         | Alpha-1-acid glycoprotein 1 | ENGTISR_7_6_1_2           | Outer                 | Outer          | 1.9377 | 0.0000 | Outer          | 6.6938 | 0.0000 |
| 64  | AGP exp_1  | 3385         | Alpha-1-acid glycoprotein 1 | ENGTISR_7_6_1_2           | Outer                 | Outer          | 1.6900 | 0.0026 | Outer          | 6.6799 | 0.0000 |
| 65  | AGP exp_1  | 2790         | Alpha-1-acid glycoprotein 1 | ENGTISR_7_6_1_2           | Outer                 | Outer          | 2.3127 | 0.0000 | Outer          | 6.6600 | 0.0000 |
| 66  | AGP exp_2  | 3895         | Alpha-1-acid glycoprotein 1 | ENGTISR_7_6_1_2           | Outer                 | Outer          | 0.7086 | 0.0164 | Outer          | 5.1068 | 0.0093 |
| 67  | AGP exp_1  | 4688         | Alpha-1-acid glycoprotein 1 | ENGTISR_7_6_1_3           | Outer                 | Outer          | 4.0170 | 0.0000 | Outer          | 6.7324 | 0.0000 |
| 68  | AGP exp_2  | 4696         | Alpha-1-acid glycoprotein 1 | ENGTISR_7_6_1_3           | Outer                 | Outer          | 3.2365 | 0.0000 | Outer          | 6.6803 | 0.0000 |
| 69  | AGP exp_1  | 6102         | Alpha-1-acid glycoprotein 1 | ENGTISR_7_6_1_4           | Outer                 | Outer          | 2.5417 | 0.0000 | Outer          | 6.6418 | 0.0000 |
| 70  | AGP exp_2  | 6114         | Alpha-1-acid glycoprotein 1 | ENGTISR_7_6_1_4           | Outer                 | Outer          | 2.5641 | 0.0000 | Outer          | 6.6417 | 0.0000 |
| 71  | AGP exp_1  | 5897         | Alpha-1-acid glycoprotein 1 | ENGTISR_7_6_2_4           | Outer                 | Outer          | 1.1749 | 0.0024 | Outer          | 6.5885 | 0.0000 |
| 72  | AGP exp_2  | 18684        | Alpha-1-acid glycoprotein 1 | LVPVPITNATLDQITGK_4_4_0_1 | None                  | None           | 1.8483 | 0.0000 | None           | 7.2146 | 0.0000 |
| 73  | AGP exp_2  | 18849        | Alpha-1-acid glycoprotein 1 | LVPVPITNATLDQITGK_5_4_0_1 | None                  | None           | 2.6591 | 0.0000 | None           | 7.3596 | 0.0000 |
| 74  | AGP exp_2  | 18402        | Alpha-1-acid glycoprotein 1 | LVPVPITNATLDQITGK_5_4_0_1 | None                  | None           | 3.9177 | 0.0000 | None           | 7.3569 | 0.0000 |
| 75  | AGP exp_1  | 18035        | Alpha-1-acid glycoprotein 1 | LVPVPITNATLDQITGK_5_4_0_1 | None                  | None           | 4.2533 | 0.0000 | None           | 7.3603 | 0.0000 |
| 76  | AGP exp_1  | 21226        | Alpha-1-acid glycoprotein 1 | LVPVPITNATLDQITGK_5_4_0_2 | None                  | None           | 3.1145 | 0.0000 | None           | 7.2940 | 0.0000 |
| 77  | AGP exp_2  | 21895        | Alpha-1-acid glycoprotein 1 | LVPVPITNATLDQITGK_5_4_0_2 | None                  | None           | 3.2008 | 0.0000 | None           | 7.3046 | 0.0000 |
| 78  | AGP exp_1  | 20953        | Alpha-1-acid glycoprotein 1 | LVPVPITNATLDQITGK_5_4_0_2 | None                  | None           | 3.3266 | 0.0000 | None           | 7.3103 | 0.0000 |
| 79  | AGP exp_2  | 22177        | Alpha-1-acid glycoprotein 1 | LVPVPITNATLDQITGK_5_4_0_2 | None                  | None           | 3.2260 | 0.0000 | None           | 7.3008 | 0.0000 |
| 80  | AGP exp_2  | 22181        | Alpha-1-acid glycoprotein 1 | LVPVPITNATLDQITGK_5_4_0_2 | None                  | None           | 5.5229 | 0.0000 | None           | 7.3553 | 0.0000 |
| 81  | AGP exp_1  | 21228        | Alpha-1-acid glycoprotein 1 | LVPVPITNATLDQITGK_5_4_0_2 | None                  | None           | 4.6708 | 0.0000 | None           | 7.3462 | 0.0000 |
| 82  | AGP exp_1  | 17744        | Alpha-1-acid glycoprotein 1 | LVPVPITNATLDQITGK_6_5_0_1 | None                  | None           | 3.4811 | 0.0000 | None           | 7.3720 | 0.0000 |
| 83  | AGP exp_2  | 18417        | Alpha-1-acid glycoprotein 1 | LVPVPITNATLDQITGK_6_5_0_1 | None                  | None           | 3.3644 | 0.0000 | None           | 7.3362 | 0.0000 |
| 84  | AGP exp_2  | 21663        | Alpha-1-acid glycoprotein 1 | LVPVPITNATLDQITGK_6_5_0_2 | None                  | None           | 4.0110 | 0.0000 | None           | 7.3160 | 0.0000 |
| 85  | AGP exp_2  | 21947        | Alpha-1-acid glycoprotein 1 | LVPVPITNATLDQITGK_6_5_0_2 | None                  | None           | 4.3897 | 0.0000 | None           | 7.3289 | 0.0000 |
| 86  | AGP exp_2  | 24574        | Alpha-1-acid glycoprotein 1 | LVPVPITNATLDQITGK_6_5_0_2 | None                  | None           | 3.6076 | 0.0000 | None           | 7.2904 | 0.0000 |
| 87  | AGP exp_1  | 21160        | Alpha-1-acid glycoprotein 1 | LVPVPITNATLDQITGK_6_5_0_2 | None                  | None           | 4.0035 | 0.0000 | None           | 7.3200 | 0.0000 |
| 88  | AGP exp_1  | 20785        | Alpha-1-acid glycoprotein 1 | LVPVPITNATLDQITGK_6_5_0_2 | None                  | None           | 3.7407 | 0.0000 | None           | 7.3255 | 0.0000 |
| 89  | AGP exp_1  | 23576        | Alpha-1-acid glycoprotein 1 | LVPVPITNATLDQITGK_6_5_0_2 | None                  | None           | 4.1506 | 0.0000 | None           | 7.3409 | 0.0000 |

**Supplementary Table 6. Continued.**

| No. | Experiment | CID Scan No. | N-glycoproteins               | N-glycopeptides           | Manual Classification | SVM            |        |        | DNN            |        |        |
|-----|------------|--------------|-------------------------------|---------------------------|-----------------------|----------------|--------|--------|----------------|--------|--------|
|     |            |              |                               |                           |                       | Classification | Pscore | FDR    | Classification | Pscore | FDR    |
| 90  | AGP exp_2  | 22166        | Alpha-1-acid glycoprotein 1   | LVPVPITNATLDQITGK_6_5_0_2 | None                  | None           | 3.7752 | 0.0000 | None           | 7.3175 | 0.0000 |
| 91  | AGP exp_2  | 24680        | Alpha-1-acid glycoprotein 1   | LVPVPITNATLDQITGK_6_5_0_3 | None                  | None           | 2.5918 | 0.0000 | None           | 7.2926 | 0.0000 |
| 92  | AGP exp_1  | 23647        | Alpha-1-acid glycoprotein 1   | LVPVPITNATLDQITGK_6_5_0_3 | None                  | None           | 3.4706 | 0.0000 | None           | 7.2899 | 0.0000 |
| 93  | AGP exp_1  | 23454        | Alpha-1-acid glycoprotein 1   | LVPVPITNATLDQITGK_6_5_0_3 | None                  | None           | 2.5721 | 0.0000 | None           | 7.2978 | 0.0000 |
| 94  | AGP exp_2  | 24316        | Alpha-1-acid glycoprotein 1   | LVPVPITNATLDQITGK_6_5_0_3 | None                  | None           | 3.1380 | 0.0000 | None           | 7.2778 | 0.0000 |
| 95  | AGP exp_1  | 23791        | Alpha-1-acid glycoprotein 1   | LVPVPITNATLDQITGK_6_5_0_3 | None                  | None           | 3.7673 | 0.0000 | None           | 7.3056 | 0.0000 |
| 96  | AGP exp_1  | 23496        | Alpha-1-acid glycoprotein 1   | LVPVPITNATLDQITGK_6_5_0_3 | None                  | None           | 3.3549 | 0.0000 | None           | 7.2883 | 0.0000 |
| 97  | AGP exp_2  | 24786        | Alpha-1-acid glycoprotein 1   | LVPVPITNATLDQITGK_6_5_0_3 | None                  | None           | 3.1663 | 0.0000 | None           | 7.2927 | 0.0000 |
| 98  | AGP exp_2  | 18341        | Alpha-1-acid glycoprotein 1   | LVPVPITNATLDQITGK_6_5_1_1 | Outer                 | Outer          | 5.8363 | 0.0000 | Outer          | 6.3910 | 0.0057 |
| 99  | AGP exp_1  | 17678        | Alpha-1-acid glycoprotein 1   | LVPVPITNATLDQITGK_6_5_1_1 | Outer                 | Outer          | 5.4367 | 0.0000 | Outer          | 6.3813 | 0.0056 |
| 100 | AGP exp_2  | 18352        | Alpha-1-acid glycoprotein 1   | LVPVPITNATLDQITGK_6_5_1_1 | Outer                 | Outer          | 4.8966 | 0.0000 | Outer          | 6.7355 | 0.0000 |
| 101 | AGP exp_1  | 20837        | Alpha-1-acid glycoprotein 1   | LVPVPITNATLDQITGK_6_5_1_2 | Outer                 | Outer          | 2.8410 | 0.0000 | Outer          | 6.5235 | 0.0000 |
| 102 | AGP exp_2  | 21492        | Alpha-1-acid glycoprotein 1   | LVPVPITNATLDQITGK_6_5_1_2 | Outer                 | Outer          | 3.2634 | 0.0000 | Outer          | 6.5292 | 0.0000 |
| 103 | AGP exp_2  | 21811        | Alpha-1-acid glycoprotein 1   | LVPVPITNATLDQITGK_6_5_1_2 | Outer                 | Outer          | 2.4676 | 0.0000 | Outer          | 6.3861 | 0.0057 |
| 104 | AGP exp_2  | 21715        | Alpha-1-acid glycoprotein 1   | LVPVPITNATLDQITGK_6_5_1_2 | Outer                 | Outer          | 4.3874 | 0.0000 | Outer          | 6.7393 | 0.0000 |
| 105 | AGP exp_1  | 20848        | Alpha-1-acid glycoprotein 1   | LVPVPITNATLDQITGK_6_5_1_2 | Outer                 | Outer          | 4.7882 | 0.0000 | Outer          | 6.7437 | 0.0000 |
| 106 | AGP exp_1  | 20524        | Alpha-1-acid glycoprotein 1   | LVPVPITNATLDQITGK_6_5_1_2 | Outer                 | Outer          | 1.6454 | 0.0026 | Outer          | 6.6811 | 0.0000 |
| 107 | AGP exp_1  | 23819        | Alpha-1-acid glycoprotein 1   | LVPVPITNATLDQITGK_6_5_1_3 | Outer                 | Outer          | 3.0126 | 0.0000 | Outer          | 6.5005 | 0.0000 |
| 108 | AGP exp_2  | 24491        | Alpha-1-acid glycoprotein 1   | LVPVPITNATLDQITGK_6_5_1_3 | Outer                 | Outer          | 2.7684 | 0.0000 | Outer          | 6.5397 | 0.0000 |
| 109 | AGP exp_2  | 24741        | Alpha-1-acid glycoprotein 1   | LVPVPITNATLDQITGK_6_5_1_3 | Outer                 | Outer          | 3.2342 | 0.0000 | Outer          | 6.5530 | 0.0000 |
| 110 | AGP exp_1  | 23564        | Alpha-1-acid glycoprotein 1   | LVPVPITNATLDQITGK_6_5_1_3 | Outer                 | Outer          | 3.3524 | 0.0000 | Outer          | 6.4351 | 0.0029 |
| 111 | AGP exp_1  | 23449        | Alpha-1-acid glycoprotein 1   | LVPVPITNATLDQITGK_6_5_1_3 | Outer                 | Outer          | 3.3853 | 0.0000 | Outer          | 6.7019 | 0.0000 |
| 112 | AGP exp_2  | 24453        | Alpha-1-acid glycoprotein 1   | LVPVPITNATLDQITGK_6_5_1_3 | Outer                 | Outer          | 5.3948 | 0.0000 | Outer          | 6.7122 | 0.0000 |
| 113 | AGP exp_2  | 24527        | Alpha-1-acid glycoprotein 1   | LVPVPITNATLDQITGK_6_5_1_3 | Outer                 | Outer          | 1.5981 | 0.0026 | Outer          | 6.6040 | 0.0000 |
| 114 | AGP exp_1  | 23649        | Alpha-1-acid glycoprotein 1   | LVPVPITNATLDQITGK_6_5_1_3 | Outer                 | Outer          | 1.5529 | 0.0026 | Outer          | 6.6571 | 0.0000 |
| 115 | AGP exp_2  | 24762        | Alpha-1-acid glycoprotein 1   | LVPVPITNATLDQITGK_6_5_1_3 | Outer                 | Outer          | 3.4135 | 0.0000 | Outer          | 6.6667 | 0.0000 |
| 116 | AGP exp_17 | 35459        | Alpha-1-acid glycoprotein 1   | LVPVPITNATLDQITGK_6_5_2_2 | Dual                  | Dual           | 3.0017 | 0.0000 | Dual           | 6.1046 | 0.0049 |
| 117 | AGP exp_9  | 29920        | Alpha-1-acid glycoprotein 1   | LVPVPITNATLDQITGK_6_5_2_3 | Dual                  | Dual           | 1.5618 | 0.0026 | Dual           | 6.3977 | 0.0057 |
| 118 | AGP exp_1  | 1604         | Alpha-1-acid glycoprotein 1,2 | NEEYNK_4_3_0_0            | None                  | None           | 4.2351 | 0.0000 | None           | 7.3523 | 0.0000 |
| 119 | AGP exp_2  | 1620         | Alpha-1-acid glycoprotein 1,2 | NEEYNK_4_3_0_0            | None                  | None           | 3.2300 | 0.0000 | None           | 7.2806 | 0.0000 |

**Supplementary Table 6. Continued.**

| No. | Experiment | CID Scan No. | N-glycoproteins               | N-glycopeptides | Manual Classification | SVM            |        |        | DNN            |        |        |
|-----|------------|--------------|-------------------------------|-----------------|-----------------------|----------------|--------|--------|----------------|--------|--------|
|     |            |              |                               |                 |                       | Classification | Pscore | FDR    | Classification | Pscore | FDR    |
| 120 | AGP exp_2  | 1459         | Alpha-1-acid glycoprotein 1,2 | NEEYNK_4_3_0_1  | None                  | None           | 5.6724 | 0.0000 | None           | 7.3759 | 0.0000 |
| 121 | AGP exp_2  | 1456         | Alpha-1-acid glycoprotein 1,2 | NEEYNK_4_3_0_1  | None                  | None           | 5.0169 | 0.0000 | None           | 7.3970 | 0.0000 |
| 122 | AGP exp_2  | 1955         | Alpha-1-acid glycoprotein 1,2 | NEEYNK_4_3_0_1  | None                  | None           | 3.9518 | 0.0000 | None           | 7.2801 | 0.0000 |
| 123 | AGP exp_1  | 1707         | Alpha-1-acid glycoprotein 1,2 | NEEYNK_4_3_0_1  | None                  | None           | 3.2298 | 0.0000 | None           | 7.2738 | 0.0000 |
| 124 | AGP exp_1  | 1461         | Alpha-1-acid glycoprotein 1,2 | NEEYNK_4_3_0_1  | None                  | None           | 5.6291 | 0.0000 | None           | 7.3745 | 0.0000 |
| 125 | AGP exp_2  | 1582         | Alpha-1-acid glycoprotein 1,2 | NEEYNK_4_4_0_1  | None                  | None           | 3.4439 | 0.0000 | None           | 7.3800 | 0.0000 |
| 126 | AGP exp_2  | 1774         | Alpha-1-acid glycoprotein 1,2 | NEEYNK_4_4_0_1  | None                  | None           | 3.4937 | 0.0000 | None           | 7.1492 | 0.0000 |
| 127 | AGP exp_1  | 1730         | Alpha-1-acid glycoprotein 1,2 | NEEYNK_4_4_0_1  | None                  | None           | 3.2545 | 0.0000 | None           | 7.2449 | 0.0000 |
| 128 | AGP exp_1  | 1571         | Alpha-1-acid glycoprotein 1,2 | NEEYNK_4_4_0_1  | None                  | None           | 2.6851 | 0.0000 | None           | 7.3220 | 0.0000 |
| 129 | AGP exp_1  | 1598         | Alpha-1-acid glycoprotein 1,2 | NEEYNK_4_4_0_1  | None                  | None           | 4.2406 | 0.0000 | None           | 7.3174 | 0.0000 |
| 130 | AGP exp_1  | 1432         | Alpha-1-acid glycoprotein 1,2 | NEEYNK_5_4_0_0  | None                  | None           | 2.3909 | 0.0000 | None           | 7.3094 | 0.0000 |
| 131 | AGP exp_2  | 1404         | Alpha-1-acid glycoprotein 1,2 | NEEYNK_5_4_0_0  | None                  | None           | 3.4515 | 0.0000 | None           | 7.3720 | 0.0000 |
| 132 | AGP exp_2  | 1622         | Alpha-1-acid glycoprotein 1,2 | NEEYNK_5_4_0_0  | None                  | None           | 2.8494 | 0.0000 | None           | 7.1948 | 0.0000 |
| 133 | AGP exp_2  | 1871         | Alpha-1-acid glycoprotein 1,2 | NEEYNK_5_4_0_0  | None                  | None           | 3.5384 | 0.0000 | None           | 7.2341 | 0.0000 |
| 134 | AGP exp_2  | 1963         | Alpha-1-acid glycoprotein 1,2 | NEEYNK_5_4_0_1  | None                  | None           | 2.8572 | 0.0000 | None           | 7.2915 | 0.0000 |
| 135 | AGP exp_2  | 1960         | Alpha-1-acid glycoprotein 1,2 | NEEYNK_5_4_0_1  | None                  | None           | 3.0855 | 0.0000 | None           | 6.9043 | 0.0000 |
| 136 | AGP exp_2  | 1776         | Alpha-1-acid glycoprotein 1,2 | NEEYNK_5_4_0_1  | None                  | None           | 2.8441 | 0.0000 | None           | 7.3158 | 0.0000 |
| 137 | AGP exp_2  | 1772         | Alpha-1-acid glycoprotein 1,2 | NEEYNK_5_4_0_1  | None                  | None           | 3.3945 | 0.0000 | None           | 7.1079 | 0.0000 |
| 138 | AGP exp_1  | 1942         | Alpha-1-acid glycoprotein 1,2 | NEEYNK_5_4_0_1  | None                  | None           | 2.8477 | 0.0000 | None           | 7.2931 | 0.0000 |
| 139 | AGP exp_1  | 1717         | Alpha-1-acid glycoprotein 1,2 | NEEYNK_5_4_0_1  | None                  | None           | 2.9489 | 0.0000 | None           | 7.0823 | 0.0000 |
| 140 | AGP exp_2  | 2848         | Alpha-1-acid glycoprotein 1,2 | NEEYNK_5_4_0_1  | None                  | None           | 3.5696 | 0.0000 | None           | 6.9572 | 0.0000 |
| 141 | AGP exp_1  | 2822         | Alpha-1-acid glycoprotein 1,2 | NEEYNK_5_4_0_1  | None                  | None           | 3.0057 | 0.0000 | None           | 6.9574 | 0.0000 |
| 142 | AGP exp_1  | 1937         | Alpha-1-acid glycoprotein 1,2 | NEEYNK_5_4_0_1  | None                  | None           | 3.3968 | 0.0000 | None           | 6.8089 | 0.0000 |
| 143 | AGP exp_1  | 2122         | Alpha-1-acid glycoprotein 1,2 | NEEYNK_5_4_0_1  | None                  | None           | 3.3132 | 0.0000 | None           | 6.7731 | 0.0000 |
| 144 | AGP exp_2  | 2130         | Alpha-1-acid glycoprotein 1,2 | NEEYNK_5_4_0_1  | None                  | None           | 3.6642 | 0.0000 | None           | 7.1684 | 0.0000 |
| 145 | AGP exp_2  | 2280         | Alpha-1-acid glycoprotein 1,2 | NEEYNK_5_4_0_1  | None                  | None           | 2.6934 | 0.0000 | None           | 7.2098 | 0.0000 |
| 146 | AGP exp_1  | 2709         | Alpha-1-acid glycoprotein 1,2 | NEEYNK_5_4_0_2  | None                  | None           | 4.2379 | 0.0000 | None           | 7.3236 | 0.0000 |
| 147 | AGP exp_2  | 3443         | Alpha-1-acid glycoprotein 1,2 | NEEYNK_5_4_0_2  | None                  | None           | 2.9149 | 0.0000 | None           | 7.2817 | 0.0000 |
| 148 | AGP exp_2  | 2710         | Alpha-1-acid glycoprotein 1,2 | NEEYNK_5_4_0_2  | None                  | None           | 4.1254 | 0.0000 | None           | 7.3173 | 0.0000 |
| 149 | AGP exp_1  | 3310         | Alpha-1-acid glycoprotein 1,2 | NEEYNK_5_4_0_2  | None                  | None           | 2.8892 | 0.0000 | None           | 7.2775 | 0.0000 |

**Supplementary Table 6. Continued.**

| No. | Experiment | CID Scan No. | N-glycoproteins               | N-glycopeptides | Manual Classification | SVM            |        |        | DNN            |        |        |
|-----|------------|--------------|-------------------------------|-----------------|-----------------------|----------------|--------|--------|----------------|--------|--------|
|     |            |              |                               |                 |                       | Classification | Pscore | FDR    | Classification | Pscore | FDR    |
| 150 | AGP exp_2  | 2806         | Alpha-1-acid glycoprotein 1,2 | NEEYNK_5_4_0_2  | None                  | None           | 4.0969 | 0.0000 | None           | 7.3172 | 0.0000 |
| 151 | AGP exp_1  | 3042         | Alpha-1-acid glycoprotein 1,2 | NEEYNK_5_4_0_2  | None                  | None           | 3.6173 | 0.0000 | None           | 7.3096 | 0.0000 |
| 152 | AGP exp_2  | 3146         | Alpha-1-acid glycoprotein 1,2 | NEEYNK_5_4_0_2  | None                  | None           | 3.8253 | 0.0000 | None           | 7.3070 | 0.0000 |
| 153 | AGP exp_2  | 2545         | Alpha-1-acid glycoprotein 1,2 | NEEYNK_5_4_0_2  | None                  | None           | 2.9264 | 0.0000 | None           | 7.1620 | 0.0000 |
| 154 | AGP exp_2  | 3159         | Alpha-1-acid glycoprotein 1,2 | NEEYNK_5_4_0_2  | None                  | None           | 3.1025 | 0.0000 | None           | 7.2279 | 0.0000 |
| 155 | AGP exp_2  | 2710         | Alpha-1-acid glycoprotein 1,2 | NEEYNK_5_4_0_2  | None                  | None           | 4.1254 | 0.0000 | None           | 7.3173 | 0.0000 |
| 156 | AGP exp_1  | 3115         | Alpha-1-acid glycoprotein 1,2 | NEEYNK_5_4_0_2  | None                  | None           | 3.3099 | 0.0000 | None           | 7.1882 | 0.0000 |
| 157 | AGP exp_2  | 4501         | Alpha-1-acid glycoprotein 1,2 | NEEYNK_5_4_0_2  | None                  | None           | 3.8572 | 0.0000 | None           | 7.2877 | 0.0000 |
| 158 | AGP exp_2  | 3738         | Alpha-1-acid glycoprotein 1,2 | NEEYNK_5_4_0_2  | None                  | None           | 2.4811 | 0.0000 | None           | 7.2780 | 0.0000 |
| 159 | AGP exp_2  | 3470         | Alpha-1-acid glycoprotein 1,2 | NEEYNK_5_4_0_2  | None                  | None           | 3.3912 | 0.0000 | None           | 7.2123 | 0.0000 |
| 160 | AGP exp_1  | 3387         | Alpha-1-acid glycoprotein 1,2 | NEEYNK_5_4_0_2  | None                  | None           | 3.2015 | 0.0000 | None           | 7.3429 | 0.0000 |
| 161 | AGP exp_2  | 3794         | Alpha-1-acid glycoprotein 1,2 | NEEYNK_5_4_0_2  | None                  | None           | 2.0508 | 0.0000 | None           | 6.9221 | 0.0000 |
| 162 | AGP exp_1  | 2977         | Alpha-1-acid glycoprotein 1,2 | NEEYNK_5_4_1_2  | Core                  | Core           | 0.5235 | 0.0490 | Core           | 6.6365 | 0.0000 |
| 163 | AGP exp_2  | 3119         | Alpha-1-acid glycoprotein 1,2 | NEEYNK_5_4_1_2  | Core                  | Core           | 1.4007 | 0.0025 | Core           | 6.6247 | 0.0000 |
| 164 | AGP exp_1  | 2420         | Alpha-1-acid glycoprotein 1,2 | NEEYNK_5_4_1_2  | Outer                 | Outer          | 3.6095 | 0.0000 | Outer          | 6.6868 | 0.0000 |
| 165 | AGP exp_2  | 2514         | Alpha-1-acid glycoprotein 1,2 | NEEYNK_5_4_1_2  | Outer                 | Outer          | 3.1255 | 0.0000 | Outer          | 6.6266 | 0.0000 |
| 166 | AGP exp_1  | 2651         | Alpha-1-acid glycoprotein 1,2 | NEEYNK_5_4_1_2  | Outer                 | Outer          | 1.2365 | 0.0024 | Outer          | 6.3561 | 0.0055 |
| 167 | AGP exp_2  | 2787         | Alpha-1-acid glycoprotein 1,2 | NEEYNK_5_4_1_2  | Outer                 | Outer          | 4.1798 | 0.0000 | Outer          | 6.6467 | 0.0000 |
| 168 | AGP exp_17 | 4351         | Alpha-1-acid glycoprotein 1,2 | NEEYNK_5_4_2_2  | Dual                  | Dual           | 3.5701 | 0.0000 | Dual           | 6.2850 | 0.0054 |
| 169 | AGP exp_8  | 4179         | Alpha-1-acid glycoprotein 1,2 | NEEYNK_5_4_2_2  | Dual                  | Dual           | 0.6683 | 0.0209 | Dual           | 4.6692 | 0.0092 |
| 170 | AGP exp_30 | 4733         | Alpha-1-acid glycoprotein 1,2 | NEEYNK_5_4_2_2  | Dual                  | Dual           | 1.8525 | 0.0000 | Dual           | 6.0131 | 0.0073 |
| 171 | AGP exp_20 | 4457         | Alpha-1-acid glycoprotein 1,2 | NEEYNK_5_4_2_2  | Dual                  | Dual           | 4.3552 | 0.0000 | Dual           | 6.3825 | 0.0056 |
| 172 | AGP exp_11 | 4971         | Alpha-1-acid glycoprotein 1,2 | NEEYNK_5_4_2_2  | Dual                  | Dual           | 0.1564 | 0.3745 | Dual           | 5.1266 | 0.0093 |
| 173 | AGP exp_13 | 4698         | Alpha-1-acid glycoprotein 1,2 | NEEYNK_5_4_2_2  | Dual                  | Dual           | 3.2402 | 0.0000 | Dual           | 6.3492 | 0.0055 |
| 174 | AGP exp_18 | 4497         | Alpha-1-acid glycoprotein 1,2 | NEEYNK_5_4_2_2  | Dual                  | Dual           | 1.0323 | 0.0072 | Dual           | 5.2996 | 0.0094 |
| 175 | AGP exp_21 | 4556         | Alpha-1-acid glycoprotein 1,2 | NEEYNK_5_4_2_2  | Dual                  | Dual           | 2.1135 | 0.0000 | Dual           | 5.9782 | 0.0097 |
| 176 | AGP exp_1  | 3630         | Alpha-1-acid glycoprotein 1,2 | NEEYNK_5_5_0_2  | None                  | None           | 3.2616 | 0.0000 | None           | 7.2910 | 0.0000 |
| 177 | AGP exp_2  | 2140         | Alpha-1-acid glycoprotein 1,2 | NEEYNK_6_5_0_1  | None                  | None           | 2.3822 | 0.0000 | None           | 7.2510 | 0.0000 |
| 178 | AGP exp_2  | 1970         | Alpha-1-acid glycoprotein 1,2 | NEEYNK_6_5_0_1  | None                  | None           | 2.2476 | 0.0000 | None           | 7.2888 | 0.0000 |
| 179 | AGP exp_1  | 1919         | Alpha-1-acid glycoprotein 1,2 | NEEYNK_6_5_0_1  | None                  | None           | 2.6671 | 0.0000 | None           | 7.2675 | 0.0000 |



**Supplementary Table 6. Continued.**

| No. | Experiment | CID Scan No. | N-glycoproteins               | N-glycopeptides | Manual Classification | SVM            |        |        | DNN            |        |        |
|-----|------------|--------------|-------------------------------|-----------------|-----------------------|----------------|--------|--------|----------------|--------|--------|
|     |            |              |                               |                 |                       | Classification | Pscore | FDR    | Classification | Pscore | FDR    |
| 180 | AGP exp_2  | 2289         | Alpha-1-acid glycoprotein 1,2 | NEEYNK_6_5_0_1  | None                  | None           | 2.4219 | 0.0000 | None           | 7.2676 | 0.0000 |
| 181 | AGP exp_1  | 2100         | Alpha-1-acid glycoprotein 1,2 | NEEYNK_6_5_0_1  | None                  | None           | 2.0142 | 0.0000 | None           | 7.2580 | 0.0000 |
| 182 | AGP exp_1  | 2242         | Alpha-1-acid glycoprotein 1,2 | NEEYNK_6_5_0_1  | None                  | None           | 2.2420 | 0.0000 | None           | 7.2394 | 0.0000 |
| 183 | AGP exp_2  | 1967         | Alpha-1-acid glycoprotein 1,2 | NEEYNK_6_5_0_1  | None                  | None           | 2.5911 | 0.0000 | None           | 7.3018 | 0.0000 |
| 184 | AGP exp_2  | 2204         | Alpha-1-acid glycoprotein 1,2 | NEEYNK_6_5_0_1  | None                  | None           | 2.9485 | 0.0000 | None           | 6.7648 | 0.0000 |
| 185 | AGP exp_1  | 2159         | Alpha-1-acid glycoprotein 1,2 | NEEYNK_6_5_0_1  | None                  | None           | 2.4474 | 0.0000 | None           | 7.0754 | 0.0000 |
| 186 | AGP exp_1  | 1703         | Alpha-1-acid glycoprotein 1,2 | NEEYNK_6_5_0_1  | None                  | None           | 1.6353 | 0.0026 | None           | 7.2540 | 0.0000 |
| 187 | AGP exp_2  | 3251         | Alpha-1-acid glycoprotein 1,2 | NEEYNK_6_5_0_2  | None                  | None           | 2.4609 | 0.0000 | None           | 7.3114 | 0.0000 |
| 188 | AGP exp_1  | 3403         | Alpha-1-acid glycoprotein 1,2 | NEEYNK_6_5_0_2  | None                  | None           | 2.6248 | 0.0000 | None           | 7.3026 | 0.0000 |
| 189 | AGP exp_2  | 3713         | Alpha-1-acid glycoprotein 1,2 | NEEYNK_6_5_0_2  | None                  | None           | 2.6156 | 0.0000 | None           | 7.1986 | 0.0000 |
| 190 | AGP exp_2  | 3572         | Alpha-1-acid glycoprotein 1,2 | NEEYNK_6_5_0_2  | None                  | None           | 3.0547 | 0.0000 | None           | 7.3050 | 0.0000 |
| 191 | AGP exp_1  | 3672         | Alpha-1-acid glycoprotein 1,2 | NEEYNK_6_5_0_2  | None                  | None           | 2.7065 | 0.0000 | None           | 7.2660 | 0.0000 |
| 192 | AGP exp_1  | 3157         | Alpha-1-acid glycoprotein 1,2 | NEEYNK_6_5_0_2  | None                  | None           | 2.6331 | 0.0000 | None           | 7.2571 | 0.0000 |
| 193 | AGP exp_1  | 2840         | Alpha-1-acid glycoprotein 1,2 | NEEYNK_6_5_0_2  | None                  | None           | 2.8122 | 0.0000 | None           | 7.2990 | 0.0000 |
| 194 | AGP exp_2  | 3880         | Alpha-1-acid glycoprotein 1,2 | NEEYNK_6_5_0_2  | None                  | None           | 2.9622 | 0.0000 | None           | 7.2881 | 0.0000 |
| 195 | AGP exp_2  | 2944         | Alpha-1-acid glycoprotein 1,2 | NEEYNK_6_5_0_2  | None                  | None           | 1.7460 | 0.0000 | None           | 7.2835 | 0.0000 |
| 196 | AGP exp_2  | 3063         | Alpha-1-acid glycoprotein 1,2 | NEEYNK_6_5_0_2  | None                  | None           | 2.6836 | 0.0000 | None           | 7.1618 | 0.0000 |
| 197 | AGP exp_1  | 3976         | Alpha-1-acid glycoprotein 1,2 | NEEYNK_6_5_0_2  | None                  | None           | 1.8375 | 0.0000 | None           | 7.2805 | 0.0000 |
| 198 | AGP exp_2  | 4584         | Alpha-1-acid glycoprotein 1,2 | NEEYNK_6_5_0_3  | None                  | None           | 3.2134 | 0.0000 | None           | 7.2638 | 0.0000 |
| 199 | AGP exp_1  | 4491         | Alpha-1-acid glycoprotein 1,2 | NEEYNK_6_5_0_3  | None                  | None           | 3.4492 | 0.0000 | None           | 7.2909 | 0.0000 |
| 200 | AGP exp_2  | 2086         | Alpha-1-acid glycoprotein 1,2 | NEEYNK_6_5_1_1  | Outer                 | Outer          | 4.1093 | 0.0000 | Outer          | 6.6479 | 0.0000 |
| 201 | AGP exp_1  | 2075         | Alpha-1-acid glycoprotein 1,2 | NEEYNK_6_5_1_1  | Outer                 | Outer          | 1.7502 | 0.0000 | Outer          | 6.5879 | 0.0000 |
| 202 | AGP exp_1  | 1898         | Alpha-1-acid glycoprotein 1,2 | NEEYNK_6_5_1_1  | Outer                 | Outer          | 1.2386 | 0.0024 | Outer          | 6.7095 | 0.0000 |
| 203 | AGP exp_1  | 1677         | Alpha-1-acid glycoprotein 1,2 | NEEYNK_6_5_1_1  | Outer                 | Outer          | 1.4947 | 0.0025 | Outer          | 6.6653 | 0.0000 |
| 204 | AGP exp_2  | 1705         | Alpha-1-acid glycoprotein 1,2 | NEEYNK_6_5_1_1  | Outer                 | Outer          | 3.5599 | 0.0000 | Outer          | 6.7359 | 0.0000 |
| 205 | AGP exp_1  | 2780         | Alpha-1-acid glycoprotein 1,2 | NEEYNK_6_5_1_2  | Outer                 | Outer          | 4.3569 | 0.0000 | Outer          | 6.6430 | 0.0000 |
| 206 | AGP exp_1  | 2462         | Alpha-1-acid glycoprotein 1,2 | NEEYNK_6_5_1_2  | Outer                 | Outer          | 5.6047 | 0.0000 | Outer          | 6.7593 | 0.0000 |
| 207 | AGP exp_1  | 3578         | Alpha-1-acid glycoprotein 1,2 | NEEYNK_6_5_1_2  | Outer                 | Outer          | 1.3193 | 0.0025 | Outer          | 5.8283 | 0.0095 |
| 208 | AGP exp_2  | 2852         | Alpha-1-acid glycoprotein 1,2 | NEEYNK_6_5_1_2  | Outer                 | Outer          | 4.5574 | 0.0000 | Outer          | 6.6507 | 0.0000 |
| 209 | AGP exp_2  | 3164         | Alpha-1-acid glycoprotein 1,2 | NEEYNK_6_5_1_2  | Outer                 | Outer          | 2.7809 | 0.0000 | Outer          | 6.5040 | 0.0000 |

**Supplementary Table 6. Continued.**

| No. | Experiment | CID Scan No. | N-glycoproteins               | N-glycopeptides | Manual Classification | SVM            |        |        | DNN            |        |        |
|-----|------------|--------------|-------------------------------|-----------------|-----------------------|----------------|--------|--------|----------------|--------|--------|
|     |            |              |                               |                 |                       | Classification | Pscore | FDR    | Classification | Pscore | FDR    |
| 210 | AGP exp_1  | 3070         | Alpha-1-acid glycoprotein 1,2 | NEEYNK_6_5_1_2  | Outer                 | Outer          | 3.8469 | 0.0000 | Outer          | 6.6099 | 0.0000 |
| 211 | AGP exp_2  | 3788         | Alpha-1-acid glycoprotein 1,2 | NEEYNK_6_5_1_2  | Outer                 | Outer          | 3.1346 | 0.0000 | Outer          | 6.6529 | 0.0000 |
| 212 | AGP exp_1  | 4387         | Alpha-1-acid glycoprotein 1,2 | NEEYNK_6_5_1_3  | Outer                 | Outer          | 3.3251 | 0.0000 | Outer          | 6.4006 | 0.0057 |
| 213 | AGP exp_2  | 4474         | Alpha-1-acid glycoprotein 1,2 | NEEYNK_6_5_1_3  | Outer                 | Outer          | 3.4935 | 0.0000 | Outer          | 6.3556 | 0.0055 |
| 214 | AGP exp_22 | 3991         | Alpha-1-acid glycoprotein 1,2 | NEEYNK_6_5_2_2  | Dual                  | Dual           | 0.7552 | 0.0142 | Dual           | 5.6358 | 0.0094 |
| 215 | AGP exp_29 | 3654         | Alpha-1-acid glycoprotein 1,2 | NEEYNK_6_5_2_2  | Dual                  | Dual           | 2.0181 | 0.0000 | Dual           | 5.9476 | 0.0096 |
| 216 | AGP exp_24 | 4318         | Alpha-1-acid glycoprotein 1,2 | NEEYNK_6_5_2_2  | Dual                  | Dual           | 6.3717 | 0.0000 | Dual           | 6.2480 | 0.0053 |
| 217 | AGP exp_36 | 5124         | Alpha-1-acid glycoprotein 1,2 | NEEYNK_6_5_2_2  | Dual                  | Dual           | 0.0211 | 0.4802 | Dual           | 4.7695 | 0.0092 |
| 218 | AGP exp_8  | 3879         | Alpha-1-acid glycoprotein 1,2 | NEEYNK_6_5_2_2  | Dual                  | Dual           | 1.4193 | 0.0025 | Dual           | 6.0455 | 0.0073 |
| 219 | AGP exp_25 | 4570         | Alpha-1-acid glycoprotein 1,2 | NEEYNK_6_5_2_2  | Dual                  | Dual           | 2.8460 | 0.0000 | Dual           | 6.2216 | 0.0052 |
| 220 | AGP exp_31 | 5184         | Alpha-1-acid glycoprotein 1,2 | NEEYNK_6_5_2_2  | Dual                  | Dual           | 2.5829 | 0.0000 | Dual           | 6.1243 | 0.0050 |
| 221 | AGP exp_31 | 8937         | Alpha-1-acid glycoprotein 1,2 | NEEYNK_6_5_2_3  | Dual                  | Dual           | 4.8289 | 0.0000 | Dual           | 6.3255 | 0.0055 |
| 222 | AGP exp_7  | 7429         | Alpha-1-acid glycoprotein 1,2 | NEEYNK_6_5_2_3  | Dual                  | Dual           | 3.8068 | 0.0000 | Dual           | 6.3737 | 0.0056 |
| 223 | AGP exp_35 | 7860         | Alpha-1-acid glycoprotein 1,2 | NEEYNK_6_5_2_3  | Dual                  | Dual           | 3.3430 | 0.0000 | Dual           | 6.3824 | 0.0056 |
| 224 | AGP exp_6  | 5921         | Alpha-1-acid glycoprotein 1,2 | NEEYNK_6_5_2_3  | Dual                  | Dual           | 2.0065 | 0.0000 | Dual           | 6.4092 | 0.0029 |
| 225 | AGP exp_18 | 8454         | Alpha-1-acid glycoprotein 1,2 | NEEYNK_6_5_2_3  | Dual                  | Dual           | 3.4738 | 0.0000 | Dual           | 6.3692 | 0.0055 |
| 226 | AGP exp_1  | 4426         | Alpha-1-acid glycoprotein 1,2 | NEEYNK_6_5_2_3  | Dual                  | Dual           | 2.0307 | 0.0000 | Dual           | 5.9214 | 0.0096 |
| 227 | AGP exp_29 | 6967         | Alpha-1-acid glycoprotein 1,2 | NEEYNK_6_5_2_3  | Dual                  | Dual           | 5.0605 | 0.0000 | Dual           | 6.2548 | 0.0053 |
| 228 | AGP exp_30 | 8720         | Alpha-1-acid glycoprotein 1,2 | NEEYNK_6_5_2_3  | Dual                  | Dual           | 4.1497 | 0.0000 | Dual           | 6.3737 | 0.0056 |
| 229 | AGP exp_28 | 6963         | Alpha-1-acid glycoprotein 1,2 | NEEYNK_6_5_2_3  | Dual                  | Dual           | 4.6777 | 0.0000 | Dual           | 6.1839 | 0.0051 |
| 230 | AGP exp_15 | 8293         | Alpha-1-acid glycoprotein 1,2 | NEEYNK_6_5_2_3  | Dual                  | Dual           | 4.3158 | 0.0000 | Dual           | 6.2889 | 0.0054 |
| 231 | AGP exp_8  | 7529         | Alpha-1-acid glycoprotein 1,2 | NEEYNK_6_5_2_3  | Dual                  | Dual           | 3.7841 | 0.0000 | Dual           | 6.2623 | 0.0054 |
| 232 | AGP exp_33 | 8943         | Alpha-1-acid glycoprotein 1,2 | NEEYNK_6_5_2_3  | Dual                  | Dual           | 3.5011 | 0.0000 | Dual           | 6.2562 | 0.0053 |
| 233 | AGP exp_25 | 8807         | Alpha-1-acid glycoprotein 1,2 | NEEYNK_6_5_2_3  | Dual                  | Dual           | 3.3800 | 0.0000 | Dual           | 5.9661 | 0.0096 |
| 234 | AGP exp_2  | 4447         | Alpha-1-acid glycoprotein 1,2 | NEEYNK_6_5_2_3  | Dual                  | Dual           | 0.7530 | 0.0141 | Dual           | 4.9629 | 0.0093 |
| 235 | AGP exp_25 | 8651         | Alpha-1-acid glycoprotein 1,2 | NEEYNK_6_5_2_3  | Dual                  | Dual           | 2.7699 | 0.0000 | Dual           | 6.0421 | 0.0073 |
| 236 | AGP exp_13 | 9766         | Alpha-1-acid glycoprotein 1,2 | NEEYNK_6_5_2_3  | Dual                  | Dual           | 1.8164 | 0.0000 | Dual           | 6.1662 | 0.0050 |
| 237 | AGP exp_12 | 9919         | Alpha-1-acid glycoprotein 1,2 | NEEYNK_6_5_2_3  | Dual                  | Dual           | 1.2907 | 0.0025 | Dual           | 6.2717 | 0.0054 |
| 238 | AGP exp_14 | 9944         | Alpha-1-acid glycoprotein 1,2 | NEEYNK_6_5_2_3  | Dual                  | Dual           | 0.6076 | 0.0320 | Dual           | 4.6344 | 0.0092 |
| 239 | AGP exp_1  | 4393         | Alpha-1-acid glycoprotein 1,2 | NEEYNK_6_5_3_1  | Outer                 | Outer          | 3.8706 | 0.0000 | Outer          | 6.6333 | 0.0000 |

**Supplementary Table 6. Continued.**

| No. | Experiment | CID Scan No. | N-glycoproteins               | N-glycopeptides           | Manual Classification | SVM            |        |        | DNN            |        |        |
|-----|------------|--------------|-------------------------------|---------------------------|-----------------------|----------------|--------|--------|----------------|--------|--------|
|     |            |              |                               |                           |                       | Classification | Pscore | FDR    | Classification | Pscore | FDR    |
| 240 | AGP exp_1  | 25092        | Alpha-1-acid glycoprotein 1,2 | SVQEIQATFFYFTPKNK_6_5_0_3 | None                  | None           | 2.2758 | 0.0000 | None           | 7.2026 | 0.0000 |
| 241 | AGP exp_1  | 2081         | Alpha-1-acid glycoprotein 2   | ENGTVSR_5_4_0_2           | None                  | None           | 2.8546 | 0.0000 | None           | 7.2778 | 0.0000 |
| 242 | AGP exp_2  | 1631         | Alpha-1-acid glycoprotein 2   | ENGTVSR_6_5_0_1           | None                  | None           | 2.4291 | 0.0000 | None           | 7.2559 | 0.0000 |
| 243 | AGP exp_1  | 2325         | Alpha-1-acid glycoprotein 2   | ENGTVSR_6_5_0_2           | None                  | None           | 2.8573 | 0.0000 | None           | 7.3181 | 0.0000 |
| 244 | AGP exp_2  | 2363         | Alpha-1-acid glycoprotein 2   | ENGTVSR_6_5_0_2           | None                  | None           | 2.0666 | 0.0000 | None           | 7.3137 | 0.0000 |
| 245 | AGP exp_1  | 2200         | Alpha-1-acid glycoprotein 2   | ENGTVSR_6_5_0_2           | None                  | None           | 2.3083 | 0.0000 | None           | 7.2911 | 0.0000 |
| 246 | AGP exp_1  | 2417         | Alpha-1-acid glycoprotein 2   | ENGTVSR_6_5_0_2           | None                  | None           | 2.0692 | 0.0000 | None           | 7.2970 | 0.0000 |
| 247 | AGP exp_2  | 4012         | Alpha-1-acid glycoprotein 2   | ENGTVSR_6_5_0_3           | None                  | None           | 2.8613 | 0.0000 | None           | 7.2828 | 0.0000 |
| 248 | AGP exp_1  | 3871         | Alpha-1-acid glycoprotein 2   | ENGTVSR_6_5_0_3           | None                  | None           | 3.2116 | 0.0000 | None           | 7.3028 | 0.0000 |
| 249 | AGP exp_1  | 4149         | Alpha-1-acid glycoprotein 2   | ENGTVSR_6_5_0_3           | None                  | None           | 3.2606 | 0.0000 | None           | 7.2736 | 0.0000 |
| 250 | AGP exp_2  | 1588         | Alpha-1-acid glycoprotein 2   | ENGTVSR_6_5_1_1           | Outer                 | Outer          | 4.9649 | 0.0000 | Outer          | 6.7484 | 0.0000 |
| 251 | AGP exp_2  | 2426         | Alpha-1-acid glycoprotein 2   | ENGTVSR_6_5_1_2           | Outer                 | Outer          | 4.4813 | 0.0000 | Outer          | 6.6727 | 0.0000 |
| 252 | AGP exp_1  | 2302         | Alpha-1-acid glycoprotein 2   | ENGTVSR_6_5_1_2           | Outer                 | Outer          | 3.3411 | 0.0000 | Outer          | 6.7594 | 0.0000 |
| 253 | AGP exp_2  | 3847         | Alpha-1-acid glycoprotein 2   | ENGTVSR_6_5_1_3           | Outer                 | Outer          | 2.8171 | 0.0000 | Outer          | 6.2946 | 0.0054 |
| 254 | AGP exp_1  | 3758         | Alpha-1-acid glycoprotein 2   | ENGTVSR_6_5_1_3           | Outer                 | Outer          | 1.6581 | 0.0026 | Outer          | 5.1196 | 0.0093 |
| 255 | AGP exp_1  | 4042         | Alpha-1-acid glycoprotein 2   | ENGTVSR_6_5_1_3           | Outer                 | Outer          | 4.8734 | 0.0000 | Outer          | 6.6466 | 0.0000 |
| 256 | AGP exp_25 | 6954         | Alpha-1-acid glycoprotein 2   | ENGTVSR_6_5_2_3           | Dual                  | Dual           | 1.9626 | 0.0000 | Dual           | 6.1322 | 0.0050 |
| 257 | AGP exp_23 | 7051         | Alpha-1-acid glycoprotein 2   | ENGTVSR_6_5_2_3           | Dual                  | Dual           | 4.2177 | 0.0000 | Dual           | 6.2530 | 0.0053 |
| 258 | AGP exp_30 | 7102         | Alpha-1-acid glycoprotein 2   | ENGTVSR_6_5_2_3           | Dual                  | Dual           | 4.4136 | 0.0000 | Dual           | 6.1742 | 0.0050 |
| 259 | AGP exp_24 | 6629         | Alpha-1-acid glycoprotein 2   | ENGTVSR_6_5_2_3           | Dual                  | Dual           | 4.0885 | 0.0000 | Dual           | 6.2147 | 0.0052 |
| 260 | AGP exp_20 | 6653         | Alpha-1-acid glycoprotein 2   | ENGTVSR_6_5_2_3           | Dual                  | Dual           | 1.2355 | 0.0024 | Dual           | 5.8424 | 0.0095 |
| 261 | AGP exp_12 | 7628         | Alpha-1-acid glycoprotein 2   | ENGTVSR_6_5_2_3           | Dual                  | Dual           | 2.4547 | 0.0000 | Dual           | 5.8802 | 0.0096 |
| 262 | AGP exp_5  | 6180         | Alpha-1-acid glycoprotein 2   | ENGTVSR_6_5_2_3           | Dual                  | Dual           | 4.4363 | 0.0000 | Dual           | 6.2476 | 0.0053 |
| 263 | AGP exp_2  | 1493         | Alpha-1-acid glycoprotein 2   | ENGTVSR_7_6_1_1           | Outer                 | Outer          | 5.6467 | 0.0000 | Outer          | 6.6722 | 0.0000 |
| 264 | AGP exp_1  | 2034         | Alpha-1-acid glycoprotein 2   | ENGTVSR_7_6_1_2           | Outer                 | Outer          | 2.7196 | 0.0000 | Outer          | 6.6521 | 0.0000 |
| 265 | AGP exp_2  | 2068         | Alpha-1-acid glycoprotein 2   | ENGTVSR_7_6_1_2           | Outer                 | Outer          | 2.4661 | 0.0000 | Outer          | 6.6813 | 0.0000 |
| 266 | AGP exp_1  | 2173         | Alpha-1-acid glycoprotein 2   | ENGTVSR_7_6_1_2           | Outer                 | Outer          | 1.7041 | 0.0026 | Outer          | 6.6402 | 0.0000 |
| 267 | AGP exp_2  | 5011         | Alpha-1-acid glycoprotein 2   | ENGTVSR_7_6_1_4           | Outer                 | Outer          | 2.3367 | 0.0000 | Outer          | 6.6089 | 0.0000 |
| 268 | AGP exp_1  | 5112         | Alpha-1-acid glycoprotein 2   | ENGTVSR_7_6_1_4           | Outer                 | Outer          | 2.0611 | 0.0000 | Outer          | 6.5772 | 0.0000 |
| 269 | AGP exp_1  | 14653        | Alpha-1-acid glycoprotein 2   | LVPVPITNATLDR_3_3_0_0     | None                  | None           | 2.8141 | 0.0000 | None           | 7.1632 | 0.0000 |

**Supplementary Table 6. Continued.**

| No. | Experiment | CID Scan No. | N-glycoproteins             | N-glycopeptides       | Manual Classification | SVM            |        |        | DNN            |        |        |
|-----|------------|--------------|-----------------------------|-----------------------|-----------------------|----------------|--------|--------|----------------|--------|--------|
|     |            |              |                             |                       |                       | Classification | Pscore | FDR    | Classification | Pscore | FDR    |
| 270 | AGP exp_2  | 15353        | Alpha-1-acid glycoprotein 2 | LVPVPITNATLDR_3_3_0_0 | None                  | None           | 3.1758 | 0.0000 | None           | 7.2984 | 0.0000 |
| 271 | AGP exp_2  | 15433        | Alpha-1-acid glycoprotein 2 | LVPVPITNATLDR_3_3_0_0 | None                  | None           | 3.2431 | 0.0000 | None           | 7.3042 | 0.0000 |
| 272 | AGP exp_1  | 14732        | Alpha-1-acid glycoprotein 2 | LVPVPITNATLDR_3_3_0_0 | None                  | None           | 3.0890 | 0.0000 | None           | 7.2646 | 0.0000 |
| 273 | AGP exp_2  | 12253        | Alpha-1-acid glycoprotein 2 | LVPVPITNATLDR_4_4_0_1 | None                  | None           | 2.9274 | 0.0000 | None           | 7.3197 | 0.0000 |
| 274 | AGP exp_1  | 14693        | Alpha-1-acid glycoprotein 2 | LVPVPITNATLDR_5_4_0_1 | None                  | None           | 2.4356 | 0.0000 | None           | 7.0137 | 0.0000 |
| 275 | AGP exp_2  | 15498        | Alpha-1-acid glycoprotein 2 | LVPVPITNATLDR_5_4_0_1 | None                  | None           | 2.7406 | 0.0000 | None           | 7.0088 | 0.0000 |
| 276 | AGP exp_2  | 15349        | Alpha-1-acid glycoprotein 2 | LVPVPITNATLDR_5_4_0_1 | None                  | None           | 4.0226 | 0.0000 | None           | 7.3444 | 0.0000 |
| 277 | AGP exp_2  | 12062        | Alpha-1-acid glycoprotein 2 | LVPVPITNATLDR_5_4_0_1 | None                  | None           | 5.1439 | 0.0000 | None           | 7.3488 | 0.0000 |
| 278 | AGP exp_1  | 15375        | Alpha-1-acid glycoprotein 2 | LVPVPITNATLDR_5_4_0_2 | None                  | None           | 2.3111 | 0.0000 | None           | 7.2810 | 0.0000 |
| 279 | AGP exp_2  | 15598        | Alpha-1-acid glycoprotein 2 | LVPVPITNATLDR_5_4_0_2 | None                  | None           | 2.3080 | 0.0000 | None           | 6.8756 | 0.0000 |
| 280 | AGP exp_1  | 15027        | Alpha-1-acid glycoprotein 2 | LVPVPITNATLDR_5_4_0_2 | None                  | None           | 4.2682 | 0.0000 | None           | 7.3362 | 0.0000 |
| 281 | AGP exp_1  | 15062        | Alpha-1-acid glycoprotein 2 | LVPVPITNATLDR_5_4_1_2 | Outer                 | Outer          | 1.0300 | 0.0072 | Outer          | 5.6798 | 0.0095 |
| 282 | AGP exp_2  | 15539        | Alpha-1-acid glycoprotein 2 | LVPVPITNATLDR_5_4_1_2 | Outer                 | Outer          | 1.2773 | 0.0025 | Outer          | 6.2349 | 0.0052 |
| 283 | AGP exp_2  | 12153        | Alpha-1-acid glycoprotein 2 | LVPVPITNATLDR_5_5_0_1 | None                  | None           | 3.0663 | 0.0000 | None           | 7.3126 | 0.0000 |
| 284 | AGP exp_1  | 11548        | Alpha-1-acid glycoprotein 2 | LVPVPITNATLDR_5_5_0_1 | None                  | None           | 2.0510 | 0.0000 | None           | 7.3090 | 0.0000 |
| 285 | AGP exp_1  | 11847        | Alpha-1-acid glycoprotein 2 | LVPVPITNATLDR_5_5_0_1 | None                  | None           | 3.9229 | 0.0000 | None           | 7.3714 | 0.0000 |
| 286 | AGP exp_2  | 15705        | Alpha-1-acid glycoprotein 2 | LVPVPITNATLDR_5_5_0_2 | None                  | None           | 2.0980 | 0.0000 | None           | 7.2744 | 0.0000 |
| 287 | AGP exp_2  | 12110        | Alpha-1-acid glycoprotein 2 | LVPVPITNATLDR_6_5_0_1 | None                  | None           | 1.8582 | 0.0000 | None           | 7.2348 | 0.0000 |
| 288 | AGP exp_2  | 11937        | Alpha-1-acid glycoprotein 2 | LVPVPITNATLDR_6_5_0_1 | None                  | None           | 3.3524 | 0.0000 | None           | 7.3352 | 0.0000 |
| 289 | AGP exp_1  | 11608        | Alpha-1-acid glycoprotein 2 | LVPVPITNATLDR_6_5_0_1 | None                  | None           | 3.3947 | 0.0000 | None           | 7.3270 | 0.0000 |
| 290 | AGP exp_1  | 14686        | Alpha-1-acid glycoprotein 2 | LVPVPITNATLDR_6_5_0_2 | None                  | None           | 2.2535 | 0.0000 | None           | 6.9449 | 0.0000 |
| 291 | AGP exp_1  | 14947        | Alpha-1-acid glycoprotein 2 | LVPVPITNATLDR_6_5_0_2 | None                  | None           | 3.2958 | 0.0000 | None           | 7.3256 | 0.0000 |
| 292 | AGP exp_2  | 15460        | Alpha-1-acid glycoprotein 2 | LVPVPITNATLDR_6_5_0_2 | None                  | None           | 3.0793 | 0.0000 | None           | 7.3191 | 0.0000 |
| 293 | AGP exp_1  | 14571        | Alpha-1-acid glycoprotein 2 | LVPVPITNATLDR_6_5_0_2 | None                  | None           | 3.2652 | 0.0000 | None           | 7.3131 | 0.0000 |
| 294 | AGP exp_2  | 15123        | Alpha-1-acid glycoprotein 2 | LVPVPITNATLDR_6_5_0_2 | None                  | None           | 3.3663 | 0.0000 | None           | 7.3204 | 0.0000 |
| 295 | AGP exp_1  | 18288        | Alpha-1-acid glycoprotein 2 | LVPVPITNATLDR_6_5_0_3 | None                  | None           | 1.9117 | 0.0000 | None           | 7.2676 | 0.0000 |
| 296 | AGP exp_1  | 18623        | Alpha-1-acid glycoprotein 2 | LVPVPITNATLDR_6_5_0_3 | None                  | None           | 1.8812 | 0.0000 | None           | 7.2664 | 0.0000 |
| 297 | AGP exp_2  | 19281        | Alpha-1-acid glycoprotein 2 | LVPVPITNATLDR_6_5_0_3 | None                  | None           | 1.8445 | 0.0000 | None           | 7.2595 | 0.0000 |
| 298 | AGP exp_2  | 19603        | Alpha-1-acid glycoprotein 2 | LVPVPITNATLDR_6_5_0_3 | None                  | None           | 2.4175 | 0.0000 | None           | 7.2384 | 0.0000 |
| 299 | AGP exp_2  | 18920        | Alpha-1-acid glycoprotein 2 | LVPVPITNATLDR_6_5_0_3 | None                  | None           | 2.5186 | 0.0000 | None           | 7.2647 | 0.0000 |

**Supplementary Table 6. Continued.**

| No. | Experiment | CID Scan No. | N-glycoproteins             | N-glycopeptides       | Manual Classification | SVM            |         |        | DNN            |        |        |
|-----|------------|--------------|-----------------------------|-----------------------|-----------------------|----------------|---------|--------|----------------|--------|--------|
|     |            |              |                             |                       |                       | Classification | Pscore  | FDR    | Classification | Pscore | FDR    |
| 300 | AGP exp_2  | 11797        | Alpha-1-acid glycoprotein 2 | LVPVPITNATLDR_6_5_1_1 | Outer                 | Outer          | 3.5085  | 0.0000 | Outer          | 6.6678 | 0.0000 |
| 301 | AGP exp_1  | 11413        | Alpha-1-acid glycoprotein 2 | LVPVPITNATLDR_6_5_1_1 | Outer                 | Outer          | 12.1950 | 0.0000 | Outer          | 6.6418 | 0.0000 |
| 302 | AGP exp_1  | 14674        | Alpha-1-acid glycoprotein 2 | LVPVPITNATLDR_6_5_1_2 | Outer                 | Outer          | 1.9970  | 0.0000 | Outer          | 6.3895 | 0.0057 |
| 303 | AGP exp_2  | 15241        | Alpha-1-acid glycoprotein 2 | LVPVPITNATLDR_6_5_1_2 | Outer                 | Outer          | 1.3472  | 0.0025 | Outer          | 6.5181 | 0.0000 |
| 304 | AGP exp_1  | 15014        | Alpha-1-acid glycoprotein 2 | LVPVPITNATLDR_6_5_1_2 | Outer                 | Outer          | 1.8188  | 0.0000 | Outer          | 6.5939 | 0.0000 |
| 305 | AGP exp_2  | 15562        | Alpha-1-acid glycoprotein 2 | LVPVPITNATLDR_6_5_1_2 | Outer                 | Outer          | 2.6626  | 0.0000 | Outer          | 6.5781 | 0.0000 |
| 306 | AGP exp_2  | 14877        | Alpha-1-acid glycoprotein 2 | LVPVPITNATLDR_6_5_1_2 | Outer                 | Outer          | 2.7646  | 0.0000 | Outer          | 6.5441 | 0.0000 |
| 307 | AGP exp_1  | 14782        | Alpha-1-acid glycoprotein 2 | LVPVPITNATLDR_6_5_1_2 | Outer                 | Outer          | 3.3641  | 0.0000 | Outer          | 6.7559 | 0.0000 |
| 308 | AGP exp_2  | 15289        | Alpha-1-acid glycoprotein 2 | LVPVPITNATLDR_6_5_1_2 | Outer                 | Outer          | 4.7531  | 0.0000 | Outer          | 6.7752 | 0.0000 |
| 309 | AGP exp_1  | 14434        | Alpha-1-acid glycoprotein 2 | LVPVPITNATLDR_6_5_1_2 | Outer                 | Outer          | 2.9615  | 0.0000 | Outer          | 6.7741 | 0.0000 |
| 310 | AGP exp_1  | 14441        | Alpha-1-acid glycoprotein 2 | LVPVPITNATLDR_6_5_1_2 | Outer                 | Outer          | 1.2021  | 0.0024 | Outer          | 6.6818 | 0.0000 |
| 311 | AGP exp_1  | 18433        | Alpha-1-acid glycoprotein 2 | LVPVPITNATLDR_6_5_1_3 | Outer                 | Outer          | 1.5179  | 0.0025 | Outer          | 6.4650 | 0.0029 |
| 312 | AGP exp_1  | 18550        | Alpha-1-acid glycoprotein 2 | LVPVPITNATLDR_6_5_1_3 | Outer                 | Outer          | 1.8265  | 0.0000 | Outer          | 6.5966 | 0.0000 |
| 313 | AGP exp_2  | 19176        | Alpha-1-acid glycoprotein 2 | LVPVPITNATLDR_6_5_1_3 | Outer                 | Outer          | 2.1231  | 0.0000 | Outer          | 6.6538 | 0.0000 |
| 314 | IgG exp_4  | 5355         | Ig gamma-1 chain C region   | EEQYNSTYR_3_3_0_0     | None                  | None           | 3.7077  | 0.0000 | None           | 7.3127 | 0.0000 |
| 315 | IgG exp_3  | 4184         | Ig gamma-1 chain C region   | EEQYNSTYR_3_3_1_0     | Core                  | Core           | 3.9487  | 0.0000 | Core           | 6.6559 | 0.0000 |
| 316 | IgG exp_1  | 3022         | Ig gamma-1 chain C region   | EEQYNSTYR_3_3_1_0     | Core                  | Core           | 4.5255  | 0.0000 | Core           | 6.6590 | 0.0000 |
| 317 | IgG exp_4  | 5322         | Ig gamma-1 chain C region   | EEQYNSTYR_3_3_1_0     | Core                  | Core           | 5.0640  | 0.0000 | Core           | 6.6557 | 0.0000 |
| 318 | IgG exp_2  | 3021         | Ig gamma-1 chain C region   | EEQYNSTYR_3_3_1_0     | Core                  | Core           | 7.4522  | 0.0000 | Core           | 6.6333 | 0.0000 |
| 319 | IgG exp_4  | 5328         | Ig gamma-1 chain C region   | EEQYNSTYR_3_4_0_0     | None                  | None           | 2.8121  | 0.0000 | None           | 7.0449 | 0.0000 |
| 320 | IgG exp_3  | 4222         | Ig gamma-1 chain C region   | EEQYNSTYR_3_4_0_0     | None                  | None           | 2.8009  | 0.0000 | None           | 7.0744 | 0.0000 |
| 321 | IgG exp_1  | 3126         | Ig gamma-1 chain C region   | EEQYNSTYR_3_4_0_0     | None                  | None           | 2.9567  | 0.0000 | None           | 7.1448 | 0.0000 |
| 322 | IgG exp_3  | 4091         | Ig gamma-1 chain C region   | EEQYNSTYR_3_4_1_0     | Core                  | Core           | 7.7764  | 0.0000 | Core           | 6.6151 | 0.0000 |
| 323 | IgG exp_3  | 4405         | Ig gamma-1 chain C region   | EEQYNSTYR_3_4_1_0     | Core                  | Core           | 6.1788  | 0.0000 | Core           | 6.6493 | 0.0000 |
| 324 | IgG exp_4  | 5187         | Ig gamma-1 chain C region   | EEQYNSTYR_3_4_1_0     | Core                  | Core           | 5.6524  | 0.0000 | Core           | 6.6412 | 0.0000 |
| 325 | IgG exp_2  | 2997         | Ig gamma-1 chain C region   | EEQYNSTYR_3_4_1_0     | Core                  | Core           | 5.2609  | 0.0000 | Core           | 6.6554 | 0.0000 |
| 326 | IgG exp_1  | 2937         | Ig gamma-1 chain C region   | EEQYNSTYR_3_4_1_0     | Core                  | Core           | 7.7189  | 0.0000 | Core           | 6.6168 | 0.0000 |
| 327 | IgG exp_4  | 5471         | Ig gamma-1 chain C region   | EEQYNSTYR_3_5_0_0     | None                  | None           | 2.0324  | 0.0000 | None           | 7.1991 | 0.0000 |
| 328 | IgG exp_3  | 4720         | Ig gamma-1 chain C region   | EEQYNSTYR_3_5_1_0     | Core                  | Core           | 4.5235  | 0.0000 | Core           | 6.6477 | 0.0000 |
| 329 | IgG exp_4  | 5432         | Ig gamma-1 chain C region   | EEQYNSTYR_3_5_1_0     | Core                  | Core           | 3.7578  | 0.0000 | Core           | 6.6413 | 0.0000 |

**Supplementary Table 6. Continued.**

| No. | Experiment | CID Scan No. | N-glycoproteins           | N-glycopeptides   | Manual Classification | SVM            |        |        | DNN            |        |        |
|-----|------------|--------------|---------------------------|-------------------|-----------------------|----------------|--------|--------|----------------|--------|--------|
|     |            |              |                           |                   |                       | Classification | Pscore | FDR    | Classification | Pscore | FDR    |
| 330 | IgG exp_1  | 3153         | Ig gamma-1 chain C region | EEQYNSTYR_3_5_1_0 | Core                  | Core           | 4.0484 | 0.0000 | Core           | 6.6485 | 0.0000 |
| 331 | IgG exp_1  | 3010         | Ig gamma-1 chain C region | EEQYNSTYR_4_3_1_0 | Core                  | Core           | 5.4014 | 0.0000 | Core           | 6.6302 | 0.0000 |
| 332 | IgG exp_4  | 5305         | Ig gamma-1 chain C region | EEQYNSTYR_4_3_1_0 | Core                  | Core           | 5.2028 | 0.0000 | Core           | 6.6253 | 0.0000 |
| 333 | IgG exp_3  | 4168         | Ig gamma-1 chain C region | EEQYNSTYR_4_3_1_0 | Core                  | Core           | 5.6900 | 0.0000 | Core           | 6.6232 | 0.0000 |
| 334 | IgG exp_3  | 4197         | Ig gamma-1 chain C region | EEQYNSTYR_4_4_0_0 | None                  | None           | 2.8871 | 0.0000 | None           | 7.0474 | 0.0000 |
| 335 | IgG exp_1  | 3062         | Ig gamma-1 chain C region | EEQYNSTYR_4_4_0_0 | None                  | None           | 2.8884 | 0.0000 | None           | 7.0485 | 0.0000 |
| 336 | IgG exp_4  | 5318         | Ig gamma-1 chain C region | EEQYNSTYR_4_4_0_0 | None                  | None           | 2.9020 | 0.0000 | None           | 7.0795 | 0.0000 |
| 337 | IgG exp_4  | 5181         | Ig gamma-1 chain C region | EEQYNSTYR_4_4_1_0 | Core                  | Core           | 6.4000 | 0.0000 | Core           | 6.5806 | 0.0000 |
| 338 | IgG exp_2  | 3046         | Ig gamma-1 chain C region | EEQYNSTYR_4_4_1_0 | Core                  | Core           | 5.4592 | 0.0000 | Core           | 6.5810 | 0.0000 |
| 339 | IgG exp_3  | 4407         | Ig gamma-1 chain C region | EEQYNSTYR_4_4_1_0 | Core                  | Core           | 5.3591 | 0.0000 | Core           | 6.5805 | 0.0000 |
| 340 | IgG exp_1  | 2894         | Ig gamma-1 chain C region | EEQYNSTYR_4_4_1_0 | Core                  | Core           | 4.6903 | 0.0000 | Core           | 6.5777 | 0.0000 |
| 341 | IgG exp_3  | 4075         | Ig gamma-1 chain C region | EEQYNSTYR_4_4_1_0 | Core                  | Core           | 4.3514 | 0.0000 | Core           | 6.5770 | 0.0000 |
| 342 | IgG exp_1  | 3281         | Ig gamma-1 chain C region | EEQYNSTYR_4_4_1_0 | Core                  | Core           | 5.9190 | 0.0000 | Core           | 6.5792 | 0.0000 |
| 343 | IgG exp_2  | 6163         | Ig gamma-1 chain C region | EEQYNSTYR_4_4_1_0 | Core                  | Core           | 4.9212 | 0.0000 | Core           | 6.5763 | 0.0000 |
| 344 | IgG exp_3  | 5170         | Ig gamma-1 chain C region | EEQYNSTYR_4_4_1_1 | Core                  | Core           | 3.5161 | 0.0000 | Core           | 6.6463 | 0.0000 |
| 345 | IgG exp_4  | 6142         | Ig gamma-1 chain C region | EEQYNSTYR_4_4_1_1 | Core                  | Core           | 4.7292 | 0.0000 | Core           | 6.6240 | 0.0000 |
| 346 | IgG exp_1  | 3787         | Ig gamma-1 chain C region | EEQYNSTYR_4_4_1_1 | Core                  | Core           | 0.5229 | 0.0489 | Core           | 6.6619 | 0.0000 |
| 347 | IgG exp_3  | 5195         | Ig gamma-1 chain C region | EEQYNSTYR_4_4_1_1 | Core                  | Core           | 0.5350 | 0.0470 | Core           | 4.7157 | 0.0092 |
| 348 | IgG exp_1  | 3774         | Ig gamma-1 chain C region | EEQYNSTYR_4_4_1_1 | Core                  | Core           | 1.2600 | 0.0025 | Core           | 5.4845 | 0.0094 |
| 349 | IgG exp_4  | 6150         | Ig gamma-1 chain C region | EEQYNSTYR_4_4_1_1 | Core                  | Core           | 0.4984 | 0.0551 | Core           | 4.9766 | 0.0093 |
| 350 | IgG exp_2  | 3220         | Ig gamma-1 chain C region | EEQYNSTYR_4_4_1_1 | Core                  | Core           | 1.5491 | 0.0026 | Core           | 6.6452 | 0.0000 |
| 351 | IgG exp_2  | 3226         | Ig gamma-1 chain C region | EEQYNSTYR_4_4_1_1 | Core                  | Core           | 0.4865 | 0.0611 | Core           | 4.6234 | 0.0092 |
| 352 | IgG exp_1  | 3099         | Ig gamma-1 chain C region | EEQYNSTYR_4_5_1_0 | Core                  | Core           | 4.0869 | 0.0000 | Core           | 6.6167 | 0.0000 |
| 353 | IgG exp_4  | 5428         | Ig gamma-1 chain C region | EEQYNSTYR_4_5_1_0 | Core                  | Core           | 4.1221 | 0.0000 | Core           | 6.6121 | 0.0000 |
| 354 | IgG exp_3  | 4716         | Ig gamma-1 chain C region | EEQYNSTYR_4_5_1_0 | Core                  | Core           | 4.5403 | 0.0000 | Core           | 6.6071 | 0.0000 |
| 355 | IgG exp_2  | 3050         | Ig gamma-1 chain C region | EEQYNSTYR_4_5_1_0 | Core                  | Core           | 4.4673 | 0.0000 | Core           | 6.6155 | 0.0000 |
| 356 | IgG exp_4  | 5299         | Ig gamma-1 chain C region | EEQYNSTYR_5_4_0_0 | None                  | None           | 2.8925 | 0.0000 | None           | 7.1176 | 0.0000 |
| 357 | IgG exp_3  | 4199         | Ig gamma-1 chain C region | EEQYNSTYR_5_4_0_0 | None                  | None           | 3.0345 | 0.0000 | None           | 7.1074 | 0.0000 |
| 358 | IgG exp_3  | 5257         | Ig gamma-1 chain C region | EEQYNSTYR_5_4_0_1 | None                  | None           | 3.0639 | 0.0000 | None           | 6.7920 | 0.0000 |
| 359 | IgG exp_1  | 2875         | Ig gamma-1 chain C region | EEQYNSTYR_5_4_1_0 | Core                  | Core           | 3.6575 | 0.0000 | Core           | 6.6001 | 0.0000 |

**Supplementary Table 6. Continued.**

| No. | Experiment | CID Scan No. | N-glycoproteins           | N-glycopeptides   | Manual Classification | SVM            |        |        | DNN            |        |        |
|-----|------------|--------------|---------------------------|-------------------|-----------------------|----------------|--------|--------|----------------|--------|--------|
|     |            |              |                           |                   |                       | Classification | Pscore | FDR    | Classification | Pscore | FDR    |
| 360 | IgG exp_3  | 4085         | Ig gamma-1 chain C region | EEQYNSTYR_5_4_1_0 | Core                  | Core           | 4.6563 | 0.0000 | Core           | 6.6238 | 0.0000 |
| 361 | IgG exp_2  | 3003         | Ig gamma-1 chain C region | EEQYNSTYR_5_4_1_0 | Core                  | Core           | 6.0711 | 0.0000 | Core           | 6.6119 | 0.0000 |
| 362 | IgG exp_4  | 5179         | Ig gamma-1 chain C region | EEQYNSTYR_5_4_1_0 | Core                  | Core           | 3.1548 | 0.0000 | Core           | 6.5952 | 0.0000 |
| 363 | IgG exp_3  | 4413         | Ig gamma-1 chain C region | EEQYNSTYR_5_4_1_0 | Core                  | Core           | 4.9735 | 0.0000 | Core           | 6.5987 | 0.0000 |
| 364 | IgG exp_3  | 5108         | Ig gamma-1 chain C region | EEQYNSTYR_5_4_1_1 | Core                  | Core           | 1.6957 | 0.0026 | Core           | 6.6331 | 0.0000 |
| 365 | IgG exp_1  | 3671         | Ig gamma-1 chain C region | EEQYNSTYR_5_4_1_1 | Core                  | Core           | 1.3581 | 0.0025 | Core           | 6.6370 | 0.0000 |
| 366 | IgG exp_4  | 6105         | Ig gamma-1 chain C region | EEQYNSTYR_5_4_1_1 | Core                  | Core           | 1.5359 | 0.0026 | Core           | 6.6482 | 0.0000 |
| 367 | IgG exp_3  | 5110         | Ig gamma-1 chain C region | EEQYNSTYR_5_4_1_1 | Core                  | Core           | 2.7950 | 0.0000 | Core           | 6.6114 | 0.0000 |
| 368 | IgG exp_4  | 6109         | Ig gamma-1 chain C region | EEQYNSTYR_5_4_1_1 | Core                  | Core           | 3.2414 | 0.0000 | Core           | 6.6038 | 0.0000 |
| 369 | IgG exp_1  | 3693         | Ig gamma-1 chain C region | EEQYNSTYR_5_4_1_1 | Core                  | Core           | 2.7924 | 0.0000 | Core           | 6.6111 | 0.0000 |
| 370 | IgG exp_2  | 3216         | Ig gamma-1 chain C region | EEQYNSTYR_5_4_1_1 | Core                  | Core           | 3.2340 | 0.0000 | Core           | 6.6097 | 0.0000 |
| 371 | IgG exp_4  | 5450         | Ig gamma-1 chain C region | EEQYNSTYR_5_5_1_0 | Core                  | Core           | 4.7366 | 0.0000 | Core           | 6.5987 | 0.0000 |
| 372 | IgG exp_4  | 7185         | Ig gamma-2 chain C region | EEQFNSTFR_3_3_1_0 | Core                  | Core           | 5.5548 | 0.0000 | Core           | 6.6491 | 0.0000 |
| 373 | IgG exp_1  | 4437         | Ig gamma-2 chain C region | EEQFNSTFR_3_3_1_0 | Core                  | Core           | 5.2706 | 0.0000 | Core           | 6.6520 | 0.0000 |
| 374 | IgG exp_3  | 5741         | Ig gamma-2 chain C region | EEQFNSTFR_3_3_1_0 | Core                  | Core           | 2.9842 | 0.0000 | Core           | 6.6553 | 0.0000 |
| 375 | IgG exp_2  | 3508         | Ig gamma-2 chain C region | EEQFNSTFR_3_3_1_0 | Core                  | Core           | 4.1857 | 0.0000 | Core           | 6.6644 | 0.0000 |
| 376 | IgG exp_3  | 5816         | Ig gamma-2 chain C region | EEQFNSTFR_3_4_0_0 | None                  | None           | 2.8990 | 0.0000 | None           | 7.0613 | 0.0000 |
| 377 | IgG exp_4  | 7313         | Ig gamma-2 chain C region | EEQFNSTFR_3_4_0_0 | None                  | None           | 3.2226 | 0.0000 | None           | 7.1981 | 0.0000 |
| 378 | IgG exp_1  | 4557         | Ig gamma-2 chain C region | EEQFNSTFR_3_4_0_0 | None                  | None           | 3.1040 | 0.0000 | None           | 7.1548 | 0.0000 |
| 379 | IgG exp_1  | 5662         | Ig gamma-2 chain C region | EEQFNSTFR_3_4_1_0 | Core                  | Core           | 8.3928 | 0.0000 | Core           | 6.6252 | 0.0000 |
| 380 | IgG exp_2  | 3469         | Ig gamma-2 chain C region | EEQFNSTFR_3_4_1_0 | Core                  | Core           | 4.1895 | 0.0000 | Core           | 6.6601 | 0.0000 |
| 381 | IgG exp_3  | 5721         | Ig gamma-2 chain C region | EEQFNSTFR_3_4_1_0 | Core                  | Core           | 4.2076 | 0.0000 | Core           | 6.6614 | 0.0000 |
| 382 | IgG exp_4  | 7480         | Ig gamma-2 chain C region | EEQFNSTFR_3_4_1_0 | Core                  | Core           | 5.0854 | 0.0000 | Core           | 6.6548 | 0.0000 |
| 383 | IgG exp_1  | 4661         | Ig gamma-2 chain C region | EEQFNSTFR_3_4_1_0 | Core                  | Core           | 6.2986 | 0.0000 | Core           | 6.6430 | 0.0000 |
| 384 | IgG exp_3  | 6073         | Ig gamma-2 chain C region | EEQFNSTFR_3_4_1_0 | Core                  | Core           | 5.1286 | 0.0000 | Core           | 6.6588 | 0.0000 |
| 385 | IgG exp_4  | 6975         | Ig gamma-2 chain C region | EEQFNSTFR_3_4_1_0 | Core                  | Core           | 6.5437 | 0.0000 | Core           | 6.6334 | 0.0000 |
| 386 | IgG exp_1  | 4325         | Ig gamma-2 chain C region | EEQFNSTFR_3_4_1_0 | Core                  | Core           | 7.2769 | 0.0000 | Core           | 6.6297 | 0.0000 |
| 387 | IgG exp_2  | 4229         | Ig gamma-2 chain C region | EEQFNSTFR_3_4_1_0 | Core                  | Core           | 6.5823 | 0.0000 | Core           | 6.6247 | 0.0000 |
| 388 | IgG exp_2  | 3496         | Ig gamma-2 chain C region | EEQFNSTFR_3_5_1_0 | Core                  | Core           | 1.0991 | 0.0072 | Core           | 6.6928 | 0.0000 |
| 389 | IgG exp_2  | 3498         | Ig gamma-2 chain C region | EEQFNSTFR_3_5_1_0 | Core                  | Core           | 4.1640 | 0.0000 | Core           | 6.6467 | 0.0000 |

**Supplementary Table 6. Continued.**

| No. | Experiment | CID Scan No. | N-glycoproteins           | N-glycopeptides   | Manual Classification | SVM            |        |        | DNN            |        |        |
|-----|------------|--------------|---------------------------|-------------------|-----------------------|----------------|--------|--------|----------------|--------|--------|
|     |            |              |                           |                   |                       | Classification | Pscore | FDR    | Classification | Pscore | FDR    |
| 390 | IgG exp_4  | 7309         | Ig gamma-2 chain C region | EEQFNSTFR_3_5_1_0 | Core                  | Core           | 4.1690 | 0.0000 | Core           | 6.6473 | 0.0000 |
| 391 | IgG exp_3  | 5766         | Ig gamma-2 chain C region | EEQFNSTFR_3_5_1_0 | Core                  | Core           | 4.7030 | 0.0000 | Core           | 6.6473 | 0.0000 |
| 392 | IgG exp_1  | 4520         | Ig gamma-2 chain C region | EEQFNSTFR_3_5_1_0 | Core                  | Core           | 4.9268 | 0.0000 | Core           | 6.6401 | 0.0000 |
| 393 | IgG exp_4  | 7220         | Ig gamma-2 chain C region | EEQFNSTFR_4_3_1_0 | Core                  | Core           | 6.2717 | 0.0000 | Core           | 6.6299 | 0.0000 |
| 394 | IgG exp_4  | 7274         | Ig gamma-2 chain C region | EEQFNSTFR_4_4_0_0 | None                  | None           | 3.1146 | 0.0000 | None           | 7.1818 | 0.0000 |
| 395 | IgG exp_4  | 7270         | Ig gamma-2 chain C region | EEQFNSTFR_4_4_1_0 | Core                  | Core           | 6.8546 | 0.0000 | Core           | 6.6455 | 0.0000 |
| 396 | IgG exp_1  | 4427         | Ig gamma-2 chain C region | EEQFNSTFR_4_4_1_0 | Core                  | Core           | 6.5740 | 0.0000 | Core           | 6.6357 | 0.0000 |
| 397 | IgG exp_3  | 5694         | Ig gamma-2 chain C region | EEQFNSTFR_4_4_1_0 | Core                  | Core           | 7.2496 | 0.0000 | Core           | 6.6314 | 0.0000 |
| 398 | IgG exp_2  | 3467         | Ig gamma-2 chain C region | EEQFNSTFR_4_4_1_0 | Core                  | Core           | 9.6498 | 0.0000 | Core           | 6.6084 | 0.0000 |
| 399 | IgG exp_4  | 6926         | Ig gamma-2 chain C region | EEQFNSTFR_4_4_1_0 | Core                  | Core           | 5.3678 | 0.0000 | Core           | 6.6516 | 0.0000 |
| 400 | IgG exp_3  | 5692         | Ig gamma-2 chain C region | EEQFNSTFR_4_4_1_0 | Core                  | Core           | 4.0269 | 0.0000 | Core           | 6.6355 | 0.0000 |
| 401 | IgG exp_2  | 6486         | Ig gamma-2 chain C region | EEQFNSTFR_4_4_1_0 | Core                  | Core           | 5.1259 | 0.0000 | Core           | 6.6406 | 0.0000 |
| 402 | IgG exp_4  | 7268         | Ig gamma-2 chain C region | EEQFNSTFR_4_4_1_0 | Core                  | Core           | 4.5408 | 0.0000 | Core           | 6.6387 | 0.0000 |
| 403 | IgG exp_2  | 3400         | Ig gamma-2 chain C region | EEQFNSTFR_4_4_1_0 | Core                  | Core           | 5.0786 | 0.0000 | Core           | 6.6001 | 0.0000 |
| 404 | IgG exp_1  | 4717         | Ig gamma-2 chain C region | EEQFNSTFR_4_4_1_0 | Core                  | Core           | 4.1692 | 0.0000 | Core           | 6.6185 | 0.0000 |
| 405 | IgG exp_1  | 5111         | Ig gamma-2 chain C region | EEQFNSTFR_4_4_1_0 | Core                  | Core           | 5.5301 | 0.0000 | Core           | 6.6205 | 0.0000 |
| 406 | IgG exp_4  | 7620         | Ig gamma-2 chain C region | EEQFNSTFR_4_4_1_0 | Core                  | Core           | 7.6380 | 0.0000 | Core           | 6.6235 | 0.0000 |
| 407 | IgG exp_1  | 6085         | Ig gamma-2 chain C region | EEQFNSTFR_4_4_1_1 | Core                  | Core           | 0.7474 | 0.0141 | Core           | 6.6521 | 0.0000 |
| 408 | IgG exp_2  | 5075         | Ig gamma-2 chain C region | EEQFNSTFR_4_4_1_1 | Core                  | Core           | 0.5730 | 0.0407 | Core           | 6.6548 | 0.0000 |
| 409 | IgG exp_2  | 4772         | Ig gamma-2 chain C region | EEQFNSTFR_4_4_1_1 | Core                  | Core           | 3.6419 | 0.0000 | Core           | 6.6271 | 0.0000 |
| 410 | IgG exp_1  | 6083         | Ig gamma-2 chain C region | EEQFNSTFR_4_4_1_1 | Core                  | Core           | 4.3657 | 0.0000 | Core           | 6.6317 | 0.0000 |
| 411 | IgG exp_2  | 4745         | Ig gamma-2 chain C region | EEQFNSTFR_4_4_1_1 | Core                  | Core           | 1.6088 | 0.0026 | Core           | 6.6470 | 0.0000 |
| 412 | IgG exp_2  | 5110         | Ig gamma-2 chain C region | EEQFNSTFR_4_4_1_1 | Core                  | Core           | 4.6818 | 0.0000 | Core           | 6.6237 | 0.0000 |
| 413 | IgG exp_4  | 8721         | Ig gamma-2 chain C region | EEQFNSTFR_4_4_1_1 | Core                  | Core           | 7.0346 | 0.0000 | Core           | 6.6196 | 0.0000 |
| 414 | IgG exp_1  | 4464         | Ig gamma-2 chain C region | EEQFNSTFR_4_5_1_0 | Core                  | Core           | 4.0754 | 0.0000 | Core           | 6.6154 | 0.0000 |
| 415 | IgG exp_3  | 5743         | Ig gamma-2 chain C region | EEQFNSTFR_4_5_1_0 | Core                  | Core           | 4.1857 | 0.0000 | Core           | 6.6216 | 0.0000 |
| 416 | IgG exp_4  | 7257         | Ig gamma-2 chain C region | EEQFNSTFR_4_5_1_0 | Core                  | Core           | 4.3272 | 0.0000 | Core           | 6.6188 | 0.0000 |
| 417 | IgG exp_2  | 3512         | Ig gamma-2 chain C region | EEQFNSTFR_4_5_1_0 | Core                  | Core           | 5.8263 | 0.0000 | Core           | 6.6018 | 0.0000 |
| 418 | IgG exp_4  | 7236         | Ig gamma-2 chain C region | EEQFNSTFR_5_4_0_0 | None                  | None           | 2.0259 | 0.0000 | None           | 6.2031 | 0.0051 |
| 419 | IgG exp_4  | 7214         | Ig gamma-2 chain C region | EEQFNSTFR_5_4_1_0 | Core                  | Core           | 3.7300 | 0.0000 | Core           | 6.6069 | 0.0000 |



**Supplementary Table 6. Continued.**

| No. | Experiment | CID Scan No. | N-glycoproteins           | N-glycopeptides   | Manual Classification | SVM            |        |        | DNN            |        |        |
|-----|------------|--------------|---------------------------|-------------------|-----------------------|----------------|--------|--------|----------------|--------|--------|
|     |            |              |                           |                   |                       | Classification | Pscore | FDR    | Classification | Pscore | FDR    |
| 420 | IgG exp_3  | 5671         | Ig gamma-2 chain C region | EEQFNSTFR_5_4_1_0 | Core                  | Core           | 3.6328 | 0.0000 | Core           | 6.6183 | 0.0000 |
| 421 | IgG exp_1  | 4373         | Ig gamma-2 chain C region | EEQFNSTFR_5_4_1_0 | Core                  | Core           | 3.7166 | 0.0000 | Core           | 6.6099 | 0.0000 |
| 422 | IgG exp_2  | 3436         | Ig gamma-2 chain C region | EEQFNSTFR_5_4_1_0 | Core                  | Core           | 3.4724 | 0.0000 | Core           | 6.6099 | 0.0000 |
| 423 | IgG exp_4  | 8669         | Ig gamma-2 chain C region | EEQFNSTFR_5_4_1_1 | Core                  | Core           | 2.1532 | 0.0000 | Core           | 6.5920 | 0.0000 |
| 424 | IgG exp_1  | 5940         | Ig gamma-2 chain C region | EEQFNSTFR_5_4_1_1 | Core                  | Core           | 2.6620 | 0.0000 | Core           | 6.6081 | 0.0000 |
| 425 | IgG exp_2  | 4872         | Ig gamma-2 chain C region | EEQFNSTFR_5_4_1_1 | Core                  | Core           | 2.6045 | 0.0000 | Core           | 6.6063 | 0.0000 |
| 426 | IgG exp_2  | 4542         | Ig gamma-2 chain C region | EEQFNSTFR_5_4_1_1 | Core                  | Core           | 4.5137 | 0.0000 | Core           | 6.5936 | 0.0000 |
| 427 | IgG exp_1  | 4447         | Ig gamma-2 chain C region | EEQFNSTFR_5_5_1_0 | Core                  | Core           | 0.5484 | 0.0428 | Core           | 6.4698 | 0.0029 |
| 428 | IgG exp_1  | 4468         | Ig gamma-2 chain C region | EEQFNSTFR_5_5_1_0 | Core                  | Core           | 3.0054 | 0.0000 | Core           | 6.5932 | 0.0000 |
| 429 | IgG exp_3  | 5122         | Ig gamma-3 chain C region | EEQYNSTFR_4_4_1_0 | Core                  | Core           | 7.1024 | 0.0000 | Core           | 6.6233 | 0.0000 |
| 430 | IgG exp_3  | 5130         | Ig gamma-4 chain C region | EEQFNSTYR_3_4_1_0 | Core                  | Core           | 6.9948 | 0.0000 | Core           | 6.6366 | 0.0000 |
| 431 | IgG exp_1  | 3739         | Ig gamma-4 chain C region | EEQFNSTYR_3_4_1_0 | Core                  | Core           | 6.1291 | 0.0000 | Core           | 6.6352 | 0.0000 |
| 432 | IgG exp_4  | 6100         | Ig gamma-4 chain C region | EEQFNSTYR_3_4_1_0 | Core                  | Core           | 6.2809 | 0.0000 | Core           | 6.6387 | 0.0000 |
| 433 | IgG exp_1  | 3712         | Ig gamma-4 chain C region | EEQFNSTYR_4_4_1_0 | Core                  | Core           | 4.8934 | 0.0000 | Core           | 6.6247 | 0.0000 |

**Supplementary Table 7.** Glycopeptide spectrum matches of alpha-1-acid glycoprotein and immunoglobulin gamma, and their Classification as test set for machine learning.

| No. | Experiment | CID Scan No. | N-glycoproteins             | N-glycopeptides | Manual Classification | SVM            |        |        | DNN            |        |        |
|-----|------------|--------------|-----------------------------|-----------------|-----------------------|----------------|--------|--------|----------------|--------|--------|
|     |            |              |                             |                 |                       | Classification | Pscore | FDR    | Classification | Pscore | FDR    |
| 1   | AGP file 3 | 2234         | Alpha-1-acid glycoprotein 1 | ENGTISR_4_4_0_1 | None                  | None           | 3.0467 | 0.0000 | None           | 7.3061 | 0.0000 |
| 2   | AGP file 4 | 2128         | Alpha-1-acid glycoprotein 1 | ENGTISR_4_4_0_1 | None                  | None           | 2.4178 | 0.0000 | None           | 7.3251 | 0.0000 |
| 3   | AGP file 3 | 3807         | Alpha-1-acid glycoprotein 1 | ENGTISR_5_4_0_2 | None                  | None           | 2.7201 | 0.0000 | None           | 7.2825 | 0.0000 |
| 4   | AGP file 4 | 3700         | Alpha-1-acid glycoprotein 1 | ENGTISR_5_4_0_2 | None                  | None           | 2.9733 | 0.0000 | None           | 7.3085 | 0.0000 |
| 5   | AGP file 3 | 3870         | Alpha-1-acid glycoprotein 1 | ENGTISR_5_4_0_2 | None                  | None           | 3.0426 | 0.0000 | None           | 7.2961 | 0.0000 |
| 6   | AGP file 4 | 2230         | Alpha-1-acid glycoprotein 1 | ENGTISR_6_5_0_1 | None                  | None           | 2.8115 | 0.0000 | None           | 7.3019 | 0.0000 |
| 7   | AGP file 3 | 2593         | Alpha-1-acid glycoprotein 1 | ENGTISR_6_5_0_1 | None                  | None           | 2.4356 | 0.0000 | None           | 7.2806 | 0.0000 |
| 8   | AGP file 4 | 2506         | Alpha-1-acid glycoprotein 1 | ENGTISR_6_5_0_1 | None                  | None           | 2.5268 | 0.0000 | None           | 7.2704 | 0.0000 |
| 9   | AGP file 3 | 3937         | Alpha-1-acid glycoprotein 1 | ENGTISR_6_5_0_2 | None                  | None           | 2.6265 | 0.0000 | None           | 7.3227 | 0.0000 |
| 10  | AGP file 3 | 4259         | Alpha-1-acid glycoprotein 1 | ENGTISR_6_5_0_2 | None                  | None           | 2.9017 | 0.0000 | None           | 7.2774 | 0.0000 |
| 11  | AGP file 4 | 3951         | Alpha-1-acid glycoprotein 1 | ENGTISR_6_5_0_2 | None                  | None           | 2.7598 | 0.0000 | None           | 7.3073 | 0.0000 |
| 12  | AGP file 3 | 4070         | Alpha-1-acid glycoprotein 1 | ENGTISR_6_5_0_2 | None                  | None           | 2.5286 | 0.0000 | None           | 7.2450 | 0.0000 |
| 13  | AGP file 4 | 4267         | Alpha-1-acid glycoprotein 1 | ENGTISR_6_5_0_2 | None                  | None           | 3.3441 | 0.0000 | None           | 7.2863 | 0.0000 |
| 14  | AGP file 4 | 4825         | Alpha-1-acid glycoprotein 1 | ENGTISR_6_5_0_2 | None                  | None           | 2.5367 | 0.0000 | None           | 7.1166 | 0.0000 |
| 15  | AGP file 3 | 5053         | Alpha-1-acid glycoprotein 1 | ENGTISR_6_5_0_2 | None                  | None           | 2.5936 | 0.0000 | None           | 7.2821 | 0.0000 |
| 16  | AGP file 4 | 4869         | Alpha-1-acid glycoprotein 1 | ENGTISR_6_5_0_3 | None                  | None           | 2.1295 | 0.0000 | None           | 7.2775 | 0.0000 |
| 17  | AGP file 4 | 4888         | Alpha-1-acid glycoprotein 1 | ENGTISR_6_5_0_3 | None                  | None           | 2.8992 | 0.0000 | None           | 7.3139 | 0.0000 |
| 18  | AGP file 3 | 5086         | Alpha-1-acid glycoprotein 1 | ENGTISR_6_5_0_3 | None                  | None           | 2.5595 | 0.0000 | None           | 7.1643 | 0.0000 |
| 19  | AGP file 4 | 6322         | Alpha-1-acid glycoprotein 1 | ENGTISR_6_5_0_3 | None                  | None           | 0.1959 | 0.0884 | None           | 3.0169 | 0.0051 |
| 20  | AGP file 4 | 2442         | Alpha-1-acid glycoprotein 1 | ENGTISR_6_5_1_1 | Outer                 | Outer          | 5.9903 | 0.0000 | Outer          | 6.6445 | 0.0000 |
| 21  | AGP file 3 | 2567         | Alpha-1-acid glycoprotein 1 | ENGTISR_6_5_1_1 | Outer                 | Outer          | 6.2204 | 0.0000 | Outer          | 6.7155 | 0.0000 |
| 22  | AGP file 4 | 2098         | Alpha-1-acid glycoprotein 1 | ENGTISR_6_5_1_1 | Outer                 | Outer          | 6.2685 | 0.0000 | Outer          | 6.7712 | 0.0000 |
| 23  | AGP file 3 | 2250         | Alpha-1-acid glycoprotein 1 | ENGTISR_6_5_1_1 | Outer                 | Outer          | 2.7425 | 0.0000 | Outer          | 6.7528 | 0.0000 |
| 24  | AGP file 3 | 3715         | Alpha-1-acid glycoprotein 1 | ENGTISR_6_5_1_2 | Outer                 | Outer          | 4.9264 | 0.0000 | Outer          | 6.7546 | 0.0000 |
| 25  | AGP file 4 | 3820         | Alpha-1-acid glycoprotein 1 | ENGTISR_6_5_1_2 | Outer                 | Outer          | 4.1306 | 0.0000 | Outer          | 6.5384 | 0.0000 |
| 26  | AGP file 3 | 4074         | Alpha-1-acid glycoprotein 1 | ENGTISR_6_5_1_2 | Outer                 | Outer          | 4.3785 | 0.0000 | Outer          | 6.7160 | 0.0000 |
| 27  | AGP file 4 | 4161         | Alpha-1-acid glycoprotein 1 | ENGTISR_6_5_1_2 | Outer                 | Outer          | 0.3033 | 0.0051 | Outer          | 5.1012 | 0.0052 |
| 28  | AGP file 3 | 5005         | Alpha-1-acid glycoprotein 1 | ENGTISR_6_5_1_3 | Outer                 | Outer          | 3.4244 | 0.0000 | Outer          | 6.2040 | 0.0029 |
| 29  | AGP file 4 | 4831         | Alpha-1-acid glycoprotein 1 | ENGTISR_6_5_1_3 | Outer                 | Outer          | 4.4536 | 0.0000 | Outer          | 6.4357 | 0.0000 |

Supplementary Table 7. Continued.

| No. | Experiment  | CID Scan No. | N-glycoproteins             | N-glycopeptides           | Manual Classification | SVM            |        |        | DNN            |        |        |
|-----|-------------|--------------|-----------------------------|---------------------------|-----------------------|----------------|--------|--------|----------------|--------|--------|
|     |             |              |                             |                           |                       | Classification | Pscore | FDR    | Classification | Pscore | FDR    |
| 30  | AGP file 64 | 5698         | Alpha-1-acid glycoprotein 1 | ENGTISR_6_5_2_2           | Dual                  | Outer          | 1.4080 | 0.0000 | Outer          | 6.2084 | 0.0029 |
| 31  | AGP file 55 | 7912         | Alpha-1-acid glycoprotein 1 | ENGTISR_6_5_2_3           | Dual                  | Dual           | 1.1845 | 0.0000 | Dual           | 6.1175 | 0.0028 |
| 32  | AGP file 60 | 10024        | Alpha-1-acid glycoprotein 1 | ENGTISR_6_5_2_3           | Dual                  | Dual           | 2.3703 | 0.0000 | Dual           | 6.4193 | 0.0000 |
| 33  | AGP file 61 | 9868         | Alpha-1-acid glycoprotein 1 | ENGTISR_6_5_2_3           | Dual                  | Dual           | 4.3160 | 0.0000 | Dual           | 6.2311 | 0.0030 |
| 34  | AGP file 59 | 9853         | Alpha-1-acid glycoprotein 1 | ENGTISR_6_5_2_3           | Dual                  | Dual           | 4.1207 | 0.0000 | Dual           | 6.2378 | 0.0030 |
| 35  | AGP file 58 | 7974         | Alpha-1-acid glycoprotein 1 | ENGTISR_6_5_2_3           | Dual                  | Dual           | 5.6080 | 0.0000 | Dual           | 6.2328 | 0.0030 |
| 36  | AGP file 47 | 9866         | Alpha-1-acid glycoprotein 1 | ENGTISR_6_5_2_3           | Dual                  | Dual           | 2.3730 | 0.0000 | Dual           | 6.0583 | 0.0028 |
| 37  | AGP file 53 | 10186        | Alpha-1-acid glycoprotein 1 | ENGTISR_6_5_2_3           | Dual                  | Dual           | 1.3466 | 0.0000 | Dual           | 5.9687 | 0.0027 |
| 38  | AGP file 46 | 9990         | Alpha-1-acid glycoprotein 1 | ENGTISR_6_5_2_3           | Dual                  | Dual           | 3.5775 | 0.0000 | Dual           | 6.1747 | 0.0029 |
| 39  | AGP file 56 | 8077         | Alpha-1-acid glycoprotein 1 | ENGTISR_6_5_2_3           | Dual                  | Dual           | 1.0872 | 0.0000 | Dual           | 6.1637 | 0.0028 |
| 40  | AGP file 44 | 9968         | Alpha-1-acid glycoprotein 1 | ENGTISR_6_5_2_3           | Dual                  | Dual           | 3.9733 | 0.0000 | Dual           | 5.9764 | 0.0027 |
| 41  | AGP file 45 | 10035        | Alpha-1-acid glycoprotein 1 | ENGTISR_6_5_2_3           | Dual                  | Dual           | 5.6217 | 0.0000 | Dual           | 6.3302 | 0.0031 |
| 42  | AGP file 50 | 10759        | Alpha-1-acid glycoprotein 1 | ENGTISR_6_5_2_3           | Dual                  | Dual           | 0.3745 | 0.0000 | Dual           | 6.3270 | 0.0031 |
| 43  | AGP file 3  | 5059         | Alpha-1-acid glycoprotein 1 | ENGTISR_6_5_2_3           | Outer                 | Outer          | 1.7562 | 0.0000 | Outer          | 6.4962 | 0.0000 |
| 44  | AGP file 3  | 2283         | Alpha-1-acid glycoprotein 1 | ENGTISR_7_6_1_1           | Outer                 | Outer          | 4.6853 | 0.0000 | Outer          | 6.2870 | 0.0031 |
| 45  | AGP file 4  | 3157         | Alpha-1-acid glycoprotein 1 | ENGTISR_7_6_1_2           | Outer                 | Outer          | 3.0277 | 0.0000 | Outer          | 6.5702 | 0.0000 |
| 46  | AGP file 4  | 3437         | Alpha-1-acid glycoprotein 1 | ENGTISR_7_6_1_2           | Outer                 | Outer          | 1.5913 | 0.0000 | Outer          | 6.6547 | 0.0000 |
| 47  | AGP file 3  | 3935         | Alpha-1-acid glycoprotein 1 | ENGTISR_7_6_1_2           | Outer                 | Outer          | 1.3361 | 0.0000 | Outer          | 6.6560 | 0.0000 |
| 48  | AGP file 3  | 3613         | Alpha-1-acid glycoprotein 1 | ENGTISR_7_6_1_2           | Outer                 | Outer          | 2.1938 | 0.0000 | Outer          | 6.6650 | 0.0000 |
| 49  | AGP file 4  | 3719         | Alpha-1-acid glycoprotein 1 | ENGTISR_7_6_1_2           | Outer                 | Outer          | 1.5483 | 0.0000 | Outer          | 6.6272 | 0.0000 |
| 50  | AGP file 3  | 3281         | Alpha-1-acid glycoprotein 1 | ENGTISR_7_6_1_2           | Outer                 | Outer          | 3.1976 | 0.0000 | Outer          | 6.5742 | 0.0000 |
| 51  | AGP file 3  | 4937         | Alpha-1-acid glycoprotein 1 | ENGTISR_7_6_1_3           | Outer                 | Outer          | 3.1320 | 0.0000 | Outer          | 6.6870 | 0.0000 |
| 52  | AGP file 3  | 6409         | Alpha-1-acid glycoprotein 1 | ENGTISR_7_6_1_4           | Outer                 | Outer          | 2.1598 | 0.0000 | Outer          | 6.6092 | 0.0000 |
| 53  | AGP file 4  | 6024         | Alpha-1-acid glycoprotein 1 | ENGTISR_7_6_1_4           | Outer                 | Outer          | 2.6743 | 0.0000 | Outer          | 6.6412 | 0.0000 |
| 54  | AGP file 3  | 6155         | Alpha-1-acid glycoprotein 1 | ENGTISR_7_6_2_4           | Outer                 | Outer          | 0.4656 | 0.0000 | Outer          | 6.4080 | 0.0000 |
| 55  | AGP file 4  | 21712        | Alpha-1-acid glycoprotein 1 | LVPVPITNATLDQITGK_5_4_0_2 | None                  | None           | 2.9336 | 0.0000 | None           | 7.3032 | 0.0000 |
| 56  | AGP file 3  | 22375        | Alpha-1-acid glycoprotein 1 | LVPVPITNATLDQITGK_5_4_0_2 | None                  | None           | 3.4870 | 0.0000 | None           | 7.3069 | 0.0000 |
| 57  | AGP file 4  | 22014        | Alpha-1-acid glycoprotein 1 | LVPVPITNATLDQITGK_5_4_0_2 | None                  | None           | 3.6594 | 0.0000 | None           | 7.3052 | 0.0000 |
| 58  | AGP file 4  | 21900        | Alpha-1-acid glycoprotein 1 | LVPVPITNATLDQITGK_5_4_0_2 | None                  | None           | 5.1908 | 0.0000 | None           | 7.3476 | 0.0000 |
| 59  | AGP file 3  | 21916        | Alpha-1-acid glycoprotein 1 | LVPVPITNATLDQITGK_5_4_0_2 | None                  | None           | 5.3898 | 0.0000 | None           | 7.3534 | 0.0000 |

**Supplementary Table 7. Continued.**

| No. | Experiment | CID Scan No. | N-glycoproteins             | N-glycopeptides           | Manual Classification | SVM            |        |        | DNN            |        |        |
|-----|------------|--------------|-----------------------------|---------------------------|-----------------------|----------------|--------|--------|----------------|--------|--------|
|     |            |              |                             |                           |                       | Classification | Pscore | FDR    | Classification | Pscore | FDR    |
| 60  | AGP file 3 | 22208        | Alpha-1-acid glycoprotein 1 | LVPVPITNATLDQITGK_5_4_0_2 | None                  | None           | 4.5843 | 0.0000 | None           | 7.3348 | 0.0000 |
| 61  | AGP file 4 | 17971        | Alpha-1-acid glycoprotein 1 | LVPVPITNATLDQITGK_6_5_0_1 | None                  | None           | 2.8148 | 0.0000 | None           | 7.1189 | 0.0000 |
| 62  | AGP file 4 | 18169        | Alpha-1-acid glycoprotein 1 | LVPVPITNATLDQITGK_6_5_0_1 | None                  | None           | 3.6583 | 0.0000 | None           | 7.3692 | 0.0000 |
| 63  | AGP file 3 | 18255        | Alpha-1-acid glycoprotein 1 | LVPVPITNATLDQITGK_6_5_0_1 | None                  | None           | 3.5472 | 0.0000 | None           | 7.3410 | 0.0000 |
| 64  | AGP file 3 | 18568        | Alpha-1-acid glycoprotein 1 | LVPVPITNATLDQITGK_6_5_0_1 | None                  | None           | 3.4470 | 0.0000 | None           | 7.3730 | 0.0000 |
| 65  | AGP file 3 | 21756        | Alpha-1-acid glycoprotein 1 | LVPVPITNATLDQITGK_6_5_0_2 | None                  | None           | 4.0106 | 0.0000 | None           | 7.3154 | 0.0000 |
| 66  | AGP file 3 | 21804        | Alpha-1-acid glycoprotein 1 | LVPVPITNATLDQITGK_6_5_0_2 | None                  | None           | 3.7254 | 0.0000 | None           | 7.3276 | 0.0000 |
| 67  | AGP file 3 | 21566        | Alpha-1-acid glycoprotein 1 | LVPVPITNATLDQITGK_6_5_0_2 | None                  | None           | 3.8454 | 0.0000 | None           | 7.3202 | 0.0000 |
| 68  | AGP file 4 | 21554        | Alpha-1-acid glycoprotein 1 | LVPVPITNATLDQITGK_6_5_0_2 | None                  | None           | 3.5502 | 0.0000 | None           | 7.3127 | 0.0000 |
| 69  | AGP file 3 | 22024        | Alpha-1-acid glycoprotein 1 | LVPVPITNATLDQITGK_6_5_0_2 | None                  | None           | 4.2481 | 0.0000 | None           | 7.3183 | 0.0000 |
| 70  | AGP file 4 | 21868        | Alpha-1-acid glycoprotein 1 | LVPVPITNATLDQITGK_6_5_0_2 | None                  | None           | 2.3372 | 0.0000 | None           | 7.3019 | 0.0000 |
| 71  | AGP file 4 | 24860        | Alpha-1-acid glycoprotein 1 | LVPVPITNATLDQITGK_6_5_0_3 | None                  | None           | 2.4052 | 0.0000 | None           | 7.2948 | 0.0000 |
| 72  | AGP file 3 | 25815        | Alpha-1-acid glycoprotein 1 | LVPVPITNATLDQITGK_6_5_0_3 | None                  | None           | 2.6202 | 0.0000 | None           | 7.2883 | 0.0000 |
| 73  | AGP file 3 | 25633        | Alpha-1-acid glycoprotein 1 | LVPVPITNATLDQITGK_6_5_0_3 | None                  | None           | 2.4872 | 0.0000 | None           | 7.2762 | 0.0000 |
| 74  | AGP file 3 | 25301        | Alpha-1-acid glycoprotein 1 | LVPVPITNATLDQITGK_6_5_0_3 | None                  | None           | 3.3390 | 0.0000 | None           | 7.2864 | 0.0000 |
| 75  | AGP file 3 | 25591        | Alpha-1-acid glycoprotein 1 | LVPVPITNATLDQITGK_6_5_0_3 | None                  | None           | 3.2909 | 0.0000 | None           | 7.2888 | 0.0000 |
| 76  | AGP file 4 | 24579        | Alpha-1-acid glycoprotein 1 | LVPVPITNATLDQITGK_6_5_0_3 | None                  | None           | 1.9914 | 0.0000 | None           | 7.2870 | 0.0000 |
| 77  | AGP file 4 | 24847        | Alpha-1-acid glycoprotein 1 | LVPVPITNATLDQITGK_6_5_0_3 | None                  | None           | 3.1487 | 0.0000 | None           | 7.2823 | 0.0000 |
| 78  | AGP file 4 | 25276        | Alpha-1-acid glycoprotein 1 | LVPVPITNATLDQITGK_6_5_0_3 | None                  | None           | 3.5334 | 0.0000 | None           | 7.2993 | 0.0000 |
| 79  | AGP file 4 | 25139        | Alpha-1-acid glycoprotein 1 | LVPVPITNATLDQITGK_6_5_0_3 | None                  | None           | 3.4774 | 0.0000 | None           | 7.2766 | 0.0000 |
| 80  | AGP file 3 | 25817        | Alpha-1-acid glycoprotein 1 | LVPVPITNATLDQITGK_6_5_0_3 | None                  | None           | 2.8529 | 0.0000 | None           | 7.2858 | 0.0000 |
| 81  | AGP file 4 | 18062        | Alpha-1-acid glycoprotein 1 | LVPVPITNATLDQITGK_6_5_1_1 | Outer                 | Outer          | 5.0517 | 0.0000 | Outer          | 5.9627 | 0.0027 |
| 82  | AGP file 3 | 18440        | Alpha-1-acid glycoprotein 1 | LVPVPITNATLDQITGK_6_5_1_1 | Outer                 | Outer          | 5.6793 | 0.0000 | Outer          | 6.3831 | 0.0000 |
| 83  | AGP file 4 | 18128        | Alpha-1-acid glycoprotein 1 | LVPVPITNATLDQITGK_6_5_1_1 | Outer                 | Outer          | 1.5347 | 0.0000 | Outer          | 6.5834 | 0.0000 |
| 84  | AGP file 4 | 21470        | Alpha-1-acid glycoprotein 1 | LVPVPITNATLDQITGK_6_5_1_2 | Outer                 | Outer          | 2.5356 | 0.0000 | Outer          | 6.3935 | 0.0000 |
| 85  | AGP file 3 | 21715        | Alpha-1-acid glycoprotein 1 | LVPVPITNATLDQITGK_6_5_1_2 | Outer                 | Outer          | 3.5811 | 0.0000 | Outer          | 6.1429 | 0.0028 |
| 86  | AGP file 3 | 22028        | Alpha-1-acid glycoprotein 1 | LVPVPITNATLDQITGK_6_5_1_2 | Outer                 | Outer          | 2.6749 | 0.0000 | Outer          | 6.0400 | 0.0028 |
| 87  | AGP file 4 | 21473        | Alpha-1-acid glycoprotein 1 | LVPVPITNATLDQITGK_6_5_1_2 | Outer                 | Outer          | 3.5554 | 0.0000 | Outer          | 6.6331 | 0.0000 |
| 88  | AGP file 3 | 21787        | Alpha-1-acid glycoprotein 1 | LVPVPITNATLDQITGK_6_5_1_2 | Outer                 | Outer          | 4.0335 | 0.0000 | Outer          | 6.7353 | 0.0000 |
| 89  | AGP file 4 | 24923        | Alpha-1-acid glycoprotein 1 | LVPVPITNATLDQITGK_6_5_1_3 | Outer                 | Outer          | 3.1163 | 0.0000 | Outer          | 6.5155 | 0.0000 |

Supplementary Table 7. Continued.

| No. | Experiment  | CID Scan No. | N-glycoproteins               | N-glycopeptides           | Manual Classification | SVM            |        |        | DNN            |        |        |
|-----|-------------|--------------|-------------------------------|---------------------------|-----------------------|----------------|--------|--------|----------------|--------|--------|
|     |             |              |                               |                           |                       | Classification | Pscore | FDR    | Classification | Pscore | FDR    |
| 90  | AGP file 4  | 25175        | Alpha-1-acid glycoprotein 1   | LVPVPITNATLDQITGK_6_5_1_3 | Outer                 | Outer          | 3.9031 | 0.0000 | Outer          | 6.5903 | 0.0000 |
| 91  | AGP file 3  | 25409        | Alpha-1-acid glycoprotein 1   | LVPVPITNATLDQITGK_6_5_1_3 | Outer                 | Outer          | 3.4040 | 0.0000 | Outer          | 6.4387 | 0.0000 |
| 92  | AGP file 3  | 25437        | Alpha-1-acid glycoprotein 1   | LVPVPITNATLDQITGK_6_5_1_3 | Outer                 | Outer          | 3.3240 | 0.0000 | Outer          | 6.6816 | 0.0000 |
| 93  | AGP file 3  | 25420        | Alpha-1-acid glycoprotein 1   | LVPVPITNATLDQITGK_6_5_1_3 | Outer                 | Outer          | 2.9512 | 0.0000 | Outer          | 6.4908 | 0.0000 |
| 94  | AGP file 3  | 25702        | Alpha-1-acid glycoprotein 1   | LVPVPITNATLDQITGK_6_5_1_3 | Outer                 | Outer          | 3.7735 | 0.0000 | Outer          | 6.6600 | 0.0000 |
| 95  | AGP file 3  | 25364        | Alpha-1-acid glycoprotein 1   | LVPVPITNATLDQITGK_6_5_1_3 | Outer                 | Outer          | 3.3483 | 0.0000 | Outer          | 6.6917 | 0.0000 |
| 96  | AGP file 3  | 25708        | Alpha-1-acid glycoprotein 1   | LVPVPITNATLDQITGK_6_5_1_3 | Outer                 | Outer          | 4.5064 | 0.0000 | Outer          | 6.6642 | 0.0000 |
| 97  | AGP file 4  | 24925        | Alpha-1-acid glycoprotein 1   | LVPVPITNATLDQITGK_6_5_1_3 | Outer                 | Outer          | 2.4385 | 0.0000 | Outer          | 6.7011 | 0.0000 |
| 98  | AGP file 4  | 25177        | Alpha-1-acid glycoprotein 1   | LVPVPITNATLDQITGK_6_5_1_3 | Outer                 | Outer          | 1.4135 | 0.0000 | Outer          | 6.6906 | 0.0000 |
| 99  | AGP file 44 | 35503        | Alpha-1-acid glycoprotein 1   | LVPVPITNATLDQITGK_6_5_2_2 | Dual                  | Dual           | 8.3284 | 0.0000 | Dual           | 6.2756 | 0.0030 |
| 100 | AGP file 37 | 29857        | Alpha-1-acid glycoprotein 1   | LVPVPITNATLDQITGK_6_5_2_3 | Dual                  | Dual           | 1.0825 | 0.0000 | Dual           | 3.3308 | 0.0051 |
| 101 | AGP file 62 | 32062        | Alpha-1-acid glycoprotein 1   | LVPVPITNATLDQITGK_6_5_2_3 | Dual                  | Dual           | 0.3593 | 0.0000 | Dual           | 3.6388 | 0.0052 |
| 102 | AGP file 56 | 29837        | Alpha-1-acid glycoprotein 1   | LVPVPITNATLDQITGK_6_5_2_3 | Dual                  | Dual           | 2.1372 | 0.0000 | Dual           | 6.2624 | 0.0030 |
| 103 | AGP file 55 | 27103        | Alpha-1-acid glycoprotein 1   | LVPVPITNATLDQITGK_6_5_2_3 | Dual                  | Dual           | 1.2700 | 0.0000 | Dual           | 6.3782 | 0.0000 |
| 104 | AGP file 4  | 1589         | Alpha-1-acid glycoprotein 1,2 | NEEYNK_4_3_0_0            | None                  | None           | 3.8889 | 0.0000 | None           | 7.3601 | 0.0000 |
| 105 | AGP file 3  | 1567         | Alpha-1-acid glycoprotein 1,2 | NEEYNK_4_3_0_0            | None                  | None           | 3.1356 | 0.0000 | None           | 7.3649 | 0.0000 |
| 106 | AGP file 4  | 1966         | Alpha-1-acid glycoprotein 1,2 | NEEYNK_4_3_0_1            | None                  | None           | 4.0073 | 0.0000 | None           | 7.3133 | 0.0000 |
| 107 | AGP file 3  | 1408         | Alpha-1-acid glycoprotein 1,2 | NEEYNK_4_3_0_1            | None                  | None           | 5.1945 | 0.0000 | None           | 7.3855 | 0.0000 |
| 108 | AGP file 3  | 1944         | Alpha-1-acid glycoprotein 1,2 | NEEYNK_4_3_0_1            | None                  | None           | 4.1547 | 0.0000 | None           | 7.2720 | 0.0000 |
| 109 | AGP file 4  | 1425         | Alpha-1-acid glycoprotein 1,2 | NEEYNK_4_3_0_1            | None                  | None           | 4.4489 | 0.0000 | None           | 7.3593 | 0.0000 |
| 110 | AGP file 4  | 1549         | Alpha-1-acid glycoprotein 1,2 | NEEYNK_4_4_0_1            | None                  | None           | 2.9046 | 0.0000 | None           | 7.3338 | 0.0000 |
| 111 | AGP file 4  | 1798         | Alpha-1-acid glycoprotein 1,2 | NEEYNK_4_4_0_1            | None                  | None           | 3.3192 | 0.0000 | None           | 7.2531 | 0.0000 |
| 112 | AGP file 3  | 1787         | Alpha-1-acid glycoprotein 1,2 | NEEYNK_4_4_0_1            | None                  | None           | 3.5788 | 0.0000 | None           | 7.1761 | 0.0000 |
| 113 | AGP file 3  | 1532         | Alpha-1-acid glycoprotein 1,2 | NEEYNK_4_4_0_1            | None                  | None           | 3.3344 | 0.0000 | None           | 7.3729 | 0.0000 |
| 114 | AGP file 3  | 2054         | Alpha-1-acid glycoprotein 1,2 | NEEYNK_4_4_0_1            | None                  | None           | 2.6593 | 0.0000 | None           | 7.2982 | 0.0000 |
| 115 | AGP file 3  | 1357         | Alpha-1-acid glycoprotein 1,2 | NEEYNK_5_4_0_0            | None                  | None           | 2.9281 | 0.0000 | None           | 7.3516 | 0.0000 |
| 116 | AGP file 4  | 1370         | Alpha-1-acid glycoprotein 1,2 | NEEYNK_5_4_0_0            | None                  | None           | 2.9743 | 0.0000 | None           | 7.2163 | 0.0000 |
| 117 | AGP file 3  | 1780         | Alpha-1-acid glycoprotein 1,2 | NEEYNK_5_4_0_1            | None                  | None           | 2.9095 | 0.0000 | None           | 7.3006 | 0.0000 |
| 118 | AGP file 3  | 2771         | Alpha-1-acid glycoprotein 1,2 | NEEYNK_5_4_0_1            | None                  | None           | 2.9453 | 0.0000 | None           | 7.2723 | 0.0000 |
| 119 | AGP file 4  | 1807         | Alpha-1-acid glycoprotein 1,2 | NEEYNK_5_4_0_1            | None                  | None           | 2.9420 | 0.0000 | None           | 7.3169 | 0.0000 |

**Supplementary Table 7. Continued.**

| No. | Experiment | CID Scan No. | N-glycoproteins               | N-glycopeptides | Manual Classification | SVM            |        |        | DNN            |        |        |
|-----|------------|--------------|-------------------------------|-----------------|-----------------------|----------------|--------|--------|----------------|--------|--------|
|     |            |              |                               |                 |                       | Classification | Pscore | FDR    | Classification | Pscore | FDR    |
| 120 | AGP file 3 | 2047         | Alpha-1-acid glycoprotein 1,2 | NEEYNK_5_4_0_1  | None                  | None           | 3.3450 | 0.0000 | None           | 6.9150 | 0.0000 |
| 121 | AGP file 4 | 1800         | Alpha-1-acid glycoprotein 1,2 | NEEYNK_5_4_0_1  | None                  | None           | 3.1833 | 0.0000 | None           | 7.2323 | 0.0000 |
| 122 | AGP file 4 | 1551         | Alpha-1-acid glycoprotein 1,2 | NEEYNK_5_4_0_1  | None                  | None           | 2.8781 | 0.0000 | None           | 7.2625 | 0.0000 |
| 123 | AGP file 3 | 1778         | Alpha-1-acid glycoprotein 1,2 | NEEYNK_5_4_0_1  | None                  | None           | 3.3179 | 0.0000 | None           | 7.0321 | 0.0000 |
| 124 | AGP file 4 | 1546         | Alpha-1-acid glycoprotein 1,2 | NEEYNK_5_4_0_1  | None                  | None           | 2.7323 | 0.0000 | None           | 7.1779 | 0.0000 |
| 125 | AGP file 3 | 2936         | Alpha-1-acid glycoprotein 1,2 | NEEYNK_5_4_0_1  | None                  | None           | 3.4094 | 0.0000 | None           | 6.7885 | 0.0000 |
| 126 | AGP file 4 | 2035         | Alpha-1-acid glycoprotein 1,2 | NEEYNK_5_4_0_1  | None                  | None           | 3.3737 | 0.0000 | None           | 7.0132 | 0.0000 |
| 127 | AGP file 3 | 3261         | Alpha-1-acid glycoprotein 1,2 | NEEYNK_5_4_0_1  | None                  | None           | 4.7644 | 0.0000 | None           | 7.2561 | 0.0000 |
| 128 | AGP file 3 | 2261         | Alpha-1-acid glycoprotein 1,2 | NEEYNK_5_4_0_1  | None                  | None           | 3.9032 | 0.0000 | None           | 7.2478 | 0.0000 |
| 129 | AGP file 4 | 2401         | Alpha-1-acid glycoprotein 1,2 | NEEYNK_5_4_0_1  | None                  | None           | 3.8444 | 0.0000 | None           | 6.2108 | 0.0029 |
| 130 | AGP file 4 | 2242         | Alpha-1-acid glycoprotein 1,2 | NEEYNK_5_4_0_1  | None                  | None           | 3.2281 | 0.0000 | None           | 6.9503 | 0.0000 |
| 131 | AGP file 3 | 2809         | Alpha-1-acid glycoprotein 1,2 | NEEYNK_5_4_0_2  | None                  | None           | 3.7883 | 0.0000 | None           | 7.3050 | 0.0000 |
| 132 | AGP file 3 | 3521         | Alpha-1-acid glycoprotein 1,2 | NEEYNK_5_4_0_2  | None                  | None           | 3.7091 | 0.0000 | None           | 7.3047 | 0.0000 |
| 133 | AGP file 3 | 3173         | Alpha-1-acid glycoprotein 1,2 | NEEYNK_5_4_0_2  | None                  | None           | 3.6805 | 0.0000 | None           | 7.3044 | 0.0000 |
| 134 | AGP file 4 | 2755         | Alpha-1-acid glycoprotein 1,2 | NEEYNK_5_4_0_2  | None                  | None           | 3.9612 | 0.0000 | None           | 7.3143 | 0.0000 |
| 135 | AGP file 4 | 3183         | Alpha-1-acid glycoprotein 1,2 | NEEYNK_5_4_0_2  | None                  | None           | 2.9492 | 0.0000 | None           | 7.0072 | 0.0000 |
| 136 | AGP file 4 | 3580         | Alpha-1-acid glycoprotein 1,2 | NEEYNK_5_4_0_2  | None                  | None           | 3.1298 | 0.0000 | None           | 7.2836 | 0.0000 |
| 137 | AGP file 3 | 2809         | Alpha-1-acid glycoprotein 1,2 | NEEYNK_5_4_0_2  | None                  | None           | 3.7883 | 0.0000 | None           | 7.3050 | 0.0000 |
| 138 | AGP file 4 | 3294         | Alpha-1-acid glycoprotein 1,2 | NEEYNK_5_4_0_2  | None                  | None           | 3.1089 | 0.0000 | None           | 7.2996 | 0.0000 |
| 139 | AGP file 3 | 3360         | Alpha-1-acid glycoprotein 1,2 | NEEYNK_5_4_0_2  | None                  | None           | 3.2683 | 0.0000 | None           | 7.1904 | 0.0000 |
| 140 | AGP file 3 | 3834         | Alpha-1-acid glycoprotein 1,2 | NEEYNK_5_4_0_2  | None                  | None           | 2.7164 | 0.0000 | None           | 7.2705 | 0.0000 |
| 141 | AGP file 4 | 2755         | Alpha-1-acid glycoprotein 1,2 | NEEYNK_5_4_0_2  | None                  | None           | 3.9612 | 0.0000 | None           | 7.3143 | 0.0000 |
| 142 | AGP file 3 | 2718         | Alpha-1-acid glycoprotein 1,2 | NEEYNK_5_4_0_2  | None                  | None           | 3.2516 | 0.0000 | None           | 7.2745 | 0.0000 |
| 143 | AGP file 3 | 4731         | Alpha-1-acid glycoprotein 1,2 | NEEYNK_5_4_0_2  | None                  | None           | 2.8649 | 0.0000 | None           | 7.2210 | 0.0000 |
| 144 | AGP file 4 | 3485         | Alpha-1-acid glycoprotein 1,2 | NEEYNK_5_4_0_2  | None                  | None           | 3.4185 | 0.0000 | None           | 7.1781 | 0.0000 |
| 145 | AGP file 3 | 3685         | Alpha-1-acid glycoprotein 1,2 | NEEYNK_5_4_0_2  | None                  | None           | 3.3264 | 0.0000 | None           | 7.0648 | 0.0000 |
| 146 | AGP file 4 | 1715         | Alpha-1-acid glycoprotein 1,2 | NEEYNK_5_4_1_1  | Outer                 | None           | 1.3966 | 0.0000 | None           | 1.3406 | 0.0175 |
| 147 | AGP file 4 | 3137         | Alpha-1-acid glycoprotein 1,2 | NEEYNK_5_4_1_2  | Core                  | Core           | 4.4033 | 0.0000 | Core           | 6.6263 | 0.0000 |
| 148 | AGP file 4 | 2595         | Alpha-1-acid glycoprotein 1,2 | NEEYNK_5_4_1_2  | Outer                 | Outer          | 1.6209 | 0.0000 | Outer          | 6.6598 | 0.0000 |
| 149 | AGP file 3 | 2931         | Alpha-1-acid glycoprotein 1,2 | NEEYNK_5_4_1_2  | Outer                 | Outer          | 0.4039 | 0.0000 | Outer          | 6.1848 | 0.0029 |

**Supplementary Table 7. Continued.**

| No. | Experiment  | CID Scan No. | N-glycoproteins               | N-glycopeptides | Manual Classification | SVM            |        |        | DNN            |        |        |
|-----|-------------|--------------|-------------------------------|-----------------|-----------------------|----------------|--------|--------|----------------|--------|--------|
|     |             |              |                               |                 |                       | Classification | Pscore | FDR    | Classification | Pscore | FDR    |
| 150 | AGP file 3  | 2675         | Alpha-1-acid glycoprotein 1,2 | NEEYNK_5_4_1_2  | Outer                 | Outer          | 1.6463 | 0.0000 | Outer          | 6.4449 | 0.0000 |
| 151 | AGP file 4  | 2845         | Alpha-1-acid glycoprotein 1,2 | NEEYNK_5_4_1_2  | Outer                 | Outer          | 4.1967 | 0.0000 | Outer          | 6.6196 | 0.0000 |
| 152 | AGP file 52 | 4342         | Alpha-1-acid glycoprotein 1,2 | NEEYNK_5_4_2_2  | Dual                  | Dual           | 1.3905 | 0.0000 | Dual           | 5.4731 | 0.0026 |
| 153 | AGP file 44 | 4264         | Alpha-1-acid glycoprotein 1,2 | NEEYNK_5_4_2_2  | Dual                  | Dual           | 1.2887 | 0.0000 | Dual           | 5.5900 | 0.0027 |
| 154 | AGP file 41 | 4857         | Alpha-1-acid glycoprotein 1,2 | NEEYNK_5_4_2_2  | Dual                  | Dual           | 2.2529 | 0.0000 | Dual           | 5.7397 | 0.0027 |
| 155 | AGP file 39 | 4131         | Alpha-1-acid glycoprotein 1,2 | NEEYNK_5_4_2_2  | Dual                  | Dual           | 0.0547 | 0.3259 | Dual           | 5.9998 | 0.0028 |
| 156 | AGP file 43 | 4783         | Alpha-1-acid glycoprotein 1,2 | NEEYNK_5_4_2_2  | Dual                  | Dual           | 0.2861 | 0.0102 | Dual           | 3.5318 | 0.0051 |
| 157 | AGP file 3  | 3997         | Alpha-1-acid glycoprotein 1,2 | NEEYNK_5_5_0_2  | None                  | None           | 3.2606 | 0.0000 | None           | 7.2693 | 0.0000 |
| 158 | AGP file 3  | 2276         | Alpha-1-acid glycoprotein 1,2 | NEEYNK_6_5_0_1  | None                  | None           | 2.2554 | 0.0000 | None           | 7.2937 | 0.0000 |
| 159 | AGP file 3  | 2471         | Alpha-1-acid glycoprotein 1,2 | NEEYNK_6_5_0_1  | None                  | None           | 2.5510 | 0.0000 | None           | 7.2387 | 0.0000 |
| 160 | AGP file 4  | 2266         | Alpha-1-acid glycoprotein 1,2 | NEEYNK_6_5_0_1  | None                  | None           | 3.2710 | 0.0000 | None           | 6.3965 | 0.0000 |
| 161 | AGP file 4  | 2383         | Alpha-1-acid glycoprotein 1,2 | NEEYNK_6_5_0_1  | None                  | None           | 2.4129 | 0.0000 | None           | 7.2537 | 0.0000 |
| 162 | AGP file 4  | 1770         | Alpha-1-acid glycoprotein 1,2 | NEEYNK_6_5_0_1  | None                  | None           | 2.7529 | 0.0000 | None           | 7.2872 | 0.0000 |
| 163 | AGP file 4  | 2226         | Alpha-1-acid glycoprotein 1,2 | NEEYNK_6_5_0_1  | None                  | None           | 2.1225 | 0.0000 | None           | 7.2615 | 0.0000 |
| 164 | AGP file 3  | 2071         | Alpha-1-acid glycoprotein 1,2 | NEEYNK_6_5_0_1  | None                  | None           | 2.5933 | 0.0000 | None           | 7.2871 | 0.0000 |
| 165 | AGP file 4  | 1845         | Alpha-1-acid glycoprotein 1,2 | NEEYNK_6_5_0_1  | None                  | None           | 2.5258 | 0.0000 | None           | 7.2210 | 0.0000 |
| 166 | AGP file 3  | 3763         | Alpha-1-acid glycoprotein 1,2 | NEEYNK_6_5_0_2  | None                  | None           | 3.0407 | 0.0000 | None           | 7.3083 | 0.0000 |
| 167 | AGP file 4  | 3530         | Alpha-1-acid glycoprotein 1,2 | NEEYNK_6_5_0_2  | None                  | None           | 2.5250 | 0.0000 | None           | 7.3051 | 0.0000 |
| 168 | AGP file 4  | 3235         | Alpha-1-acid glycoprotein 1,2 | NEEYNK_6_5_0_2  | None                  | None           | 2.7107 | 0.0000 | None           | 7.3021 | 0.0000 |
| 169 | AGP file 4  | 3849         | Alpha-1-acid glycoprotein 1,2 | NEEYNK_6_5_0_2  | None                  | None           | 2.9380 | 0.0000 | None           | 7.3021 | 0.0000 |
| 170 | AGP file 3  | 3214         | Alpha-1-acid glycoprotein 1,2 | NEEYNK_6_5_0_2  | None                  | None           | 2.5093 | 0.0000 | None           | 7.1399 | 0.0000 |
| 171 | AGP file 4  | 3732         | Alpha-1-acid glycoprotein 1,2 | NEEYNK_6_5_0_2  | None                  | None           | 2.3501 | 0.0000 | None           | 7.3153 | 0.0000 |
| 172 | AGP file 3  | 4095         | Alpha-1-acid glycoprotein 1,2 | NEEYNK_6_5_0_2  | None                  | None           | 2.9665 | 0.0000 | None           | 7.3124 | 0.0000 |
| 173 | AGP file 3  | 3129         | Alpha-1-acid glycoprotein 1,2 | NEEYNK_6_5_0_2  | None                  | None           | 2.7745 | 0.0000 | None           | 7.2555 | 0.0000 |
| 174 | AGP file 4  | 2979         | Alpha-1-acid glycoprotein 1,2 | NEEYNK_6_5_0_2  | None                  | None           | 1.8342 | 0.0000 | None           | 7.2779 | 0.0000 |
| 175 | AGP file 3  | 4779         | Alpha-1-acid glycoprotein 1,2 | NEEYNK_6_5_0_3  | None                  | None           | 3.0547 | 0.0000 | None           | 7.2993 | 0.0000 |
| 176 | AGP file 4  | 4617         | Alpha-1-acid glycoprotein 1,2 | NEEYNK_6_5_0_3  | None                  | None           | 3.5054 | 0.0000 | None           | 7.2919 | 0.0000 |
| 177 | AGP file 4  | 1713         | Alpha-1-acid glycoprotein 1,2 | NEEYNK_6_5_1_1  | Outer                 | Outer          | 6.1907 | 0.0000 | Outer          | 6.7612 | 0.0000 |
| 178 | AGP file 4  | 2002         | Alpha-1-acid glycoprotein 1,2 | NEEYNK_6_5_1_1  | Outer                 | Outer          | 4.5189 | 0.0000 | Outer          | 6.7365 | 0.0000 |
| 179 | AGP file 4  | 2181         | Alpha-1-acid glycoprotein 1,2 | NEEYNK_6_5_1_1  | Outer                 | Outer          | 4.4960 | 0.0000 | Outer          | 6.4344 | 0.0000 |

**Supplementary Table 7. Continued.**

| No. | Experiment  | CID Scan No. | N-glycoproteins               | N-glycopeptides | Manual Classification | SVM            |         |        | DNN            |        |        |
|-----|-------------|--------------|-------------------------------|-----------------|-----------------------|----------------|---------|--------|----------------|--------|--------|
|     |             |              |                               |                 |                       | Classification | Pscore  | FDR    | Classification | Pscore | FDR    |
| 180 | AGP file 3  | 2008         | Alpha-1-acid glycoprotein 1,2 | NEEYNK_6_5_1_1  | Outer                 | Outer          | 0.9040  | 0.0000 | Outer          | 6.6846 | 0.0000 |
| 181 | AGP file 3  | 2237         | Alpha-1-acid glycoprotein 1,2 | NEEYNK_6_5_1_1  | Outer                 | Outer          | 3.9857  | 0.0000 | Outer          | 6.4647 | 0.0000 |
| 182 | AGP file 3  | 3683         | Alpha-1-acid glycoprotein 1,2 | NEEYNK_6_5_1_2  | Outer                 | Dual           | 0.6520  | 0.0000 | Outer          | 2.3465 | 0.0076 |
| 183 | AGP file 3  | 3041         | Alpha-1-acid glycoprotein 1,2 | NEEYNK_6_5_1_2  | Outer                 | Outer          | 3.8267  | 0.0000 | Outer          | 6.6291 | 0.0000 |
| 184 | AGP file 4  | 3217         | Alpha-1-acid glycoprotein 1,2 | NEEYNK_6_5_1_2  | Outer                 | Outer          | 5.6858  | 0.0000 | Outer          | 6.7108 | 0.0000 |
| 185 | AGP file 4  | 2939         | Alpha-1-acid glycoprotein 1,2 | NEEYNK_6_5_1_2  | Outer                 | Outer          | 4.1689  | 0.0000 | Outer          | 6.5592 | 0.0000 |
| 186 | AGP file 3  | 3362         | Alpha-1-acid glycoprotein 1,2 | NEEYNK_6_5_1_2  | Outer                 | Outer          | 5.9786  | 0.0000 | Outer          | 6.6195 | 0.0000 |
| 187 | AGP file 4  | 2632         | Alpha-1-acid glycoprotein 1,2 | NEEYNK_6_5_1_2  | Outer                 | Outer          | 3.0519  | 0.0000 | Outer          | 6.5383 | 0.0000 |
| 188 | AGP file 4  | 3797         | Alpha-1-acid glycoprotein 1,2 | NEEYNK_6_5_1_2  | Outer                 | Outer          | 0.9666  | 0.0000 | Outer          | 5.9290 | 0.0027 |
| 189 | AGP file 3  | 3991         | Alpha-1-acid glycoprotein 1,2 | NEEYNK_6_5_1_2  | Outer                 | Outer          | 1.5652  | 0.0000 | Outer          | 5.5592 | 0.0027 |
| 190 | AGP file 4  | 3217         | Alpha-1-acid glycoprotein 1,2 | NEEYNK_6_5_1_2  | Outer                 | Outer          | 5.6858  | 0.0000 | Outer          | 6.7108 | 0.0000 |
| 191 | AGP file 3  | 4752         | Alpha-1-acid glycoprotein 1,2 | NEEYNK_6_5_1_3  | Outer                 | Outer          | 4.3485  | 0.0000 | Outer          | 6.5729 | 0.0000 |
| 192 | AGP file 4  | 4522         | Alpha-1-acid glycoprotein 1,2 | NEEYNK_6_5_1_3  | Outer                 | Outer          | 4.5515  | 0.0000 | Outer          | 6.5690 | 0.0000 |
| 193 | AGP file 56 | 3737         | Alpha-1-acid glycoprotein 1,2 | NEEYNK_6_5_2_2  | Dual                  | Dual           | 3.2943  | 0.0000 | Dual           | 6.1443 | 0.0028 |
| 194 | AGP file 52 | 3977         | Alpha-1-acid glycoprotein 1,2 | NEEYNK_6_5_2_2  | Dual                  | Dual           | 1.5624  | 0.0000 | Dual           | 6.1574 | 0.0028 |
| 195 | AGP file 59 | 4713         | Alpha-1-acid glycoprotein 1,2 | NEEYNK_6_5_2_2  | Dual                  | Dual           | 2.1139  | 0.0000 | Dual           | 6.2334 | 0.0030 |
| 196 | AGP file 57 | 3653         | Alpha-1-acid glycoprotein 1,2 | NEEYNK_6_5_2_2  | Dual                  | Dual           | 0.2827  | 0.0102 | Dual           | 5.0696 | 0.0052 |
| 197 | AGP file 63 | 4604         | Alpha-1-acid glycoprotein 1,2 | NEEYNK_6_5_2_2  | Dual                  | Dual           | 1.2872  | 0.0000 | Dual           | 5.3452 | 0.0026 |
| 198 | AGP file 39 | 3850         | Alpha-1-acid glycoprotein 1,2 | NEEYNK_6_5_2_2  | Dual                  | Outer          | 1.4422  | 0.0000 | Outer          | 5.5338 | 0.0026 |
| 199 | AGP file 57 | 4027         | Alpha-1-acid glycoprotein 1,2 | NEEYNK_6_5_2_2  | Dual                  | Dual           | 1.9759  | 0.0000 | Dual           | 6.2951 | 0.0031 |
| 200 | AGP file 67 | 4537         | Alpha-1-acid glycoprotein 1,2 | NEEYNK_6_5_2_2  | Dual                  | Dual           | 2.1094  | 0.0000 | Dual           | 5.9658 | 0.0027 |
| 201 | AGP file 39 | 4070         | Alpha-1-acid glycoprotein 1,2 | NEEYNK_6_5_2_2  | Dual                  | Dual           | 3.2718  | 0.0000 | Dual           | 6.3547 | 0.0032 |
| 202 | AGP file 3  | 2752         | Alpha-1-acid glycoprotein 1,2 | NEEYNK_6_5_2_2  | Outer                 | Outer          | 17.1242 | 0.0000 | Outer          | 6.6901 | 0.0000 |
| 203 | AGP file 61 | 4770         | Alpha-1-acid glycoprotein 1,2 | NEEYNK_6_5_2_2  | Dual                  | Dual           | 0.1961  | 0.0886 | Dual           | 2.8183 | 0.0051 |
| 204 | AGP file 66 | 4787         | Alpha-1-acid glycoprotein 1,2 | NEEYNK_6_5_2_2  | Dual                  | Dual           | 5.2580  | 0.0000 | Dual           | 6.1772 | 0.0029 |
| 205 | AGP file 62 | 4696         | Alpha-1-acid glycoprotein 1,2 | NEEYNK_6_5_2_2  | Dual                  | Dual           | 0.7411  | 0.0000 | Dual           | 5.7755 | 0.0027 |
| 206 | AGP file 53 | 4926         | Alpha-1-acid glycoprotein 1,2 | NEEYNK_6_5_2_2  | Dual                  | Dual           | 2.6902  | 0.0000 | Dual           | 5.9886 | 0.0027 |
| 207 | AGP file 43 | 5415         | Alpha-1-acid glycoprotein 1,2 | NEEYNK_6_5_2_2  | Dual                  | Dual           | 3.0408  | 0.0000 | Dual           | 6.0660 | 0.0028 |
| 208 | AGP file 64 | 4658         | Alpha-1-acid glycoprotein 1,2 | NEEYNK_6_5_2_2  | Dual                  | Dual           | 0.5906  | 0.0000 | Dual           | 6.2158 | 0.0029 |
| 209 | AGP file 40 | 5550         | Alpha-1-acid glycoprotein 1,2 | NEEYNK_6_5_2_2  | Dual                  | Dual           | 1.2843  | 0.0000 | Dual           | 5.3341 | 0.0026 |



Supplementary Table 7. Continued.

| No. | Experiment  | CID Scan No. | N-glycoproteins               | N-glycopeptides          | Manual Classification | SVM            |        |        | DNN            |        |        |
|-----|-------------|--------------|-------------------------------|--------------------------|-----------------------|----------------|--------|--------|----------------|--------|--------|
|     |             |              |                               |                          |                       | Classification | Pscore | FDR    | Classification | Pscore | FDR    |
| 210 | AGP file 51 | 5048         | Alpha-1-acid glycoprotein 1,2 | NEEYNK_6_5_2_2           | Dual                  | Dual           | 2.8658 | 0.0000 | Dual           | 6.2137 | 0.0029 |
| 211 | AGP file 64 | 4328         | Alpha-1-acid glycoprotein 1,2 | NEEYNK_6_5_2_2           | Dual                  | Outer          | 0.7245 | 0.0000 | Outer          | 5.5072 | 0.0026 |
| 212 | AGP file 67 | 4877         | Alpha-1-acid glycoprotein 1,2 | NEEYNK_6_5_2_2           | Dual                  | Dual           | 0.4370 | 0.0000 | Dual           | 4.8946 | 0.0052 |
| 213 | AGP file 43 | 9686         | Alpha-1-acid glycoprotein 1,2 | NEEYNK_6_5_2_3           | Dual                  | Dual           | 3.9169 | 0.0000 | Dual           | 6.1789 | 0.0029 |
| 214 | AGP file 39 | 7457         | Alpha-1-acid glycoprotein 1,2 | NEEYNK_6_5_2_3           | Dual                  | Dual           | 4.5920 | 0.0000 | Dual           | 6.3316 | 0.0031 |
| 215 | AGP file 42 | 9515         | Alpha-1-acid glycoprotein 1,2 | NEEYNK_6_5_2_3           | Dual                  | Dual           | 2.4794 | 0.0000 | Dual           | 5.9232 | 0.0027 |
| 216 | AGP file 67 | 8738         | Alpha-1-acid glycoprotein 1,2 | NEEYNK_6_5_2_3           | Dual                  | Dual           | 2.8096 | 0.0000 | Dual           | 6.3243 | 0.0031 |
| 217 | AGP file 63 | 8633         | Alpha-1-acid glycoprotein 1,2 | NEEYNK_6_5_2_3           | Dual                  | Dual           | 4.2796 | 0.0000 | Dual           | 6.2741 | 0.0030 |
| 218 | AGP file 55 | 3882         | Alpha-1-acid glycoprotein 1,2 | NEEYNK_6_5_2_3           | Dual                  | Dual           | 1.1139 | 0.0000 | Dual           | 6.4533 | 0.0000 |
| 219 | AGP file 52 | 8385         | Alpha-1-acid glycoprotein 1,2 | NEEYNK_6_5_2_3           | Dual                  | Dual           | 3.3425 | 0.0000 | Dual           | 6.3779 | 0.0000 |
| 220 | AGP file 47 | 8445         | Alpha-1-acid glycoprotein 1,2 | NEEYNK_6_5_2_3           | Dual                  | Dual           | 2.7107 | 0.0000 | Dual           | 5.9312 | 0.0027 |
| 221 | AGP file 59 | 8687         | Alpha-1-acid glycoprotein 1,2 | NEEYNK_6_5_2_3           | Dual                  | Dual           | 3.8803 | 0.0000 | Dual           | 6.3678 | 0.0032 |
| 222 | AGP file 44 | 8217         | Alpha-1-acid glycoprotein 1,2 | NEEYNK_6_5_2_3           | Dual                  | Dual           | 4.3774 | 0.0000 | Dual           | 6.2607 | 0.0030 |
| 223 | AGP file 49 | 8858         | Alpha-1-acid glycoprotein 1,2 | NEEYNK_6_5_2_3           | Dual                  | Dual           | 3.9697 | 0.0000 | Dual           | 6.2862 | 0.0031 |
| 224 | AGP file 54 | 3918         | Alpha-1-acid glycoprotein 1,2 | NEEYNK_6_5_2_3           | Dual                  | Dual           | 1.0613 | 0.0000 | Dual           | 6.2511 | 0.0030 |
| 225 | AGP file 4  | 4619         | Alpha-1-acid glycoprotein 1,2 | NEEYNK_6_5_2_3           | Dual                  | Dual           | 2.5267 | 0.0000 | Dual           | 6.3950 | 0.0000 |
| 226 | AGP file 40 | 10122        | Alpha-1-acid glycoprotein 1,2 | NEEYNK_6_5_2_3           | Dual                  | Dual           | 2.0131 | 0.0000 | Dual           | 6.3470 | 0.0031 |
| 227 | AGP file 36 | 5905         | Alpha-1-acid glycoprotein 1,2 | NEEYNK_6_5_2_3           | Dual                  | Dual           | 1.8280 | 0.0000 | Dual           | 5.6140 | 0.0027 |
| 228 | AGP file 3  | 4679         | Alpha-1-acid glycoprotein 1,2 | NEEYNK_6_5_3_1           | Outer                 | Outer          | 3.3886 | 0.0000 | Outer          | 6.7341 | 0.0000 |
| 229 | AGP file 3  | 5953         | Alpha-1-acid glycoprotein 1,2 | NEEYNK_6_5_3_2           | Outer                 | Outer          | 2.1363 | 0.0000 | Outer          | 6.5969 | 0.0000 |
| 230 | AGP file 4  | 26479        | Alpha-1-acid glycoprotein 1,2 | SVQEIQATFFYFTPnk_6_5_0_3 | None                  | None           | 3.3360 | 0.0000 | None           | 7.2719 | 0.0000 |
| 231 | AGP file 4  | 26406        | Alpha-1-acid glycoprotein 1,2 | SVQEIQATFFYFTPnk_7_6_0_3 | None                  | None           | 1.2425 | 0.0000 | None           | 7.2109 | 0.0000 |
| 232 | AGP file 4  | 1622         | Alpha-1-acid glycoprotein 2   | ENGTVSR_6_5_0_1          | None                  | None           | 2.3894 | 0.0000 | None           | 7.2547 | 0.0000 |
| 233 | AGP file 4  | 2301         | Alpha-1-acid glycoprotein 2   | ENGTVSR_6_5_0_2          | None                  | None           | 2.1038 | 0.0000 | None           | 7.3095 | 0.0000 |
| 234 | AGP file 3  | 2540         | Alpha-1-acid glycoprotein 2   | ENGTVSR_6_5_0_2          | None                  | None           | 1.7445 | 0.0000 | None           | 7.2618 | 0.0000 |
| 235 | AGP file 4  | 2449         | Alpha-1-acid glycoprotein 2   | ENGTVSR_6_5_0_2          | None                  | None           | 2.2651 | 0.0000 | None           | 7.3060 | 0.0000 |
| 236 | AGP file 3  | 2385         | Alpha-1-acid glycoprotein 2   | ENGTVSR_6_5_0_2          | None                  | None           | 2.6120 | 0.0000 | None           | 7.3099 | 0.0000 |
| 237 | AGP file 4  | 2552         | Alpha-1-acid glycoprotein 2   | ENGTVSR_6_5_0_2          | None                  | None           | 1.9858 | 0.0000 | None           | 7.2659 | 0.0000 |
| 238 | AGP file 3  | 2645         | Alpha-1-acid glycoprotein 2   | ENGTVSR_6_5_0_2          | None                  | None           | 2.4494 | 0.0000 | None           | 7.2877 | 0.0000 |
| 239 | AGP file 4  | 4068         | Alpha-1-acid glycoprotein 2   | ENGTVSR_6_5_0_3          | None                  | None           | 3.2961 | 0.0000 | None           | 7.3107 | 0.0000 |

Supplementary Table 7. Continued.

| No. | Experiment  | CID Scan No. | N-glycoproteins             | N-glycopeptides       | Manual Classification | SVM            |        |        | DNN            |        |        |
|-----|-------------|--------------|-----------------------------|-----------------------|-----------------------|----------------|--------|--------|----------------|--------|--------|
|     |             |              |                             |                       |                       | Classification | Pscore | FDR    | Classification | Pscore | FDR    |
| 240 | AGP file 3  | 4183         | Alpha-1-acid glycoprotein 2 | ENGTVSR_6_5_0_3       | None                  | None           | 2.6842 | 0.0000 | None           | 7.2793 | 0.0000 |
| 241 | AGP file 3  | 1431         | Alpha-1-acid glycoprotein 2 | ENGTVSR_6_5_1_1       | Outer                 | Outer          | 6.5564 | 0.0000 | Outer          | 6.7363 | 0.0000 |
| 242 | AGP file 4  | 1462         | Alpha-1-acid glycoprotein 2 | ENGTVSR_6_5_1_1       | Outer                 | Outer          | 5.5166 | 0.0000 | Outer          | 6.7343 | 0.0000 |
| 243 | AGP file 4  | 1575         | Alpha-1-acid glycoprotein 2 | ENGTVSR_6_5_1_1       | Outer                 | Outer          | 3.0600 | 0.0000 | Outer          | 6.7162 | 0.0000 |
| 244 | AGP file 3  | 2599         | Alpha-1-acid glycoprotein 2 | ENGTVSR_6_5_1_2       | Outer                 | Outer          | 5.4778 | 0.0000 | Outer          | 6.6836 | 0.0000 |
| 245 | AGP file 4  | 2306         | Alpha-1-acid glycoprotein 2 | ENGTVSR_6_5_1_2       | Outer                 | Outer          | 3.7565 | 0.0000 | Outer          | 6.5951 | 0.0000 |
| 246 | AGP file 4  | 3953         | Alpha-1-acid glycoprotein 2 | ENGTVSR_6_5_1_3       | Outer                 | Outer          | 3.4446 | 0.0000 | Outer          | 6.3575 | 0.0032 |
| 247 | AGP file 3  | 4068         | Alpha-1-acid glycoprotein 2 | ENGTVSR_6_5_1_3       | Outer                 | Outer          | 4.3726 | 0.0000 | Outer          | 6.2901 | 0.0031 |
| 248 | AGP file 48 | 6765         | Alpha-1-acid glycoprotein 2 | ENGTVSR_6_5_2_3       | Dual                  | Dual           | 0.7436 | 0.0000 | Dual           | 6.1510 | 0.0028 |
| 249 | AGP file 38 | 5961         | Alpha-1-acid glycoprotein 2 | ENGTVSR_6_5_2_3       | Dual                  | Dual           | 3.4739 | 0.0000 | Dual           | 6.2120 | 0.0029 |
| 250 | AGP file 64 | 7029         | Alpha-1-acid glycoprotein 2 | ENGTVSR_6_5_2_3       | Dual                  | Dual           | 1.5873 | 0.0000 | Dual           | 6.1374 | 0.0028 |
| 251 | AGP file 65 | 7205         | Alpha-1-acid glycoprotein 2 | ENGTVSR_6_5_2_3       | Dual                  | Dual           | 4.5793 | 0.0000 | Dual           | 6.2339 | 0.0030 |
| 252 | AGP file 62 | 7085         | Alpha-1-acid glycoprotein 2 | ENGTVSR_6_5_2_3       | Dual                  | Dual           | 2.3704 | 0.0000 | Dual           | 6.1440 | 0.0028 |
| 253 | AGP file 58 | 5844         | Alpha-1-acid glycoprotein 2 | ENGTVSR_6_5_2_3       | Dual                  | Dual           | 5.3608 | 0.0000 | Dual           | 6.2566 | 0.0030 |
| 254 | AGP file 66 | 7163         | Alpha-1-acid glycoprotein 2 | ENGTVSR_6_5_2_3       | Dual                  | Dual           | 3.3098 | 0.0000 | Dual           | 6.1781 | 0.0029 |
| 255 | AGP file 56 | 6001         | Alpha-1-acid glycoprotein 2 | ENGTVSR_6_5_2_3       | Dual                  | Dual           | 2.3885 | 0.0000 | Dual           | 6.2141 | 0.0029 |
| 256 | AGP file 4  | 1946         | Alpha-1-acid glycoprotein 2 | ENGTVSR_7_6_1_2       | Outer                 | Outer          | 2.3693 | 0.0000 | Outer          | 6.6734 | 0.0000 |
| 257 | AGP file 3  | 2390         | Alpha-1-acid glycoprotein 2 | ENGTVSR_7_6_1_2       | Outer                 | Outer          | 1.8039 | 0.0000 | Outer          | 6.5793 | 0.0000 |
| 258 | AGP file 3  | 2203         | Alpha-1-acid glycoprotein 2 | ENGTVSR_7_6_1_2       | Outer                 | Outer          | 2.0649 | 0.0000 | Outer          | 6.6283 | 0.0000 |
| 259 | AGP file 3  | 1953         | Alpha-1-acid glycoprotein 2 | ENGTVSR_7_6_1_2       | Outer                 | Outer          | 2.6110 | 0.0000 | Outer          | 6.6300 | 0.0000 |
| 260 | AGP file 4  | 2136         | Alpha-1-acid glycoprotein 2 | ENGTVSR_7_6_1_2       | Outer                 | Outer          | 2.6532 | 0.0000 | Outer          | 6.6867 | 0.0000 |
| 261 | AGP file 4  | 2157         | Alpha-1-acid glycoprotein 2 | ENGTVSR_7_6_1_2       | Outer                 | Outer          | 2.8483 | 0.0000 | Outer          | 6.7205 | 0.0000 |
| 262 | AGP file 3  | 5210         | Alpha-1-acid glycoprotein 2 | ENGTVSR_7_6_1_4       | Outer                 | Outer          | 2.7106 | 0.0000 | Outer          | 6.6235 | 0.0000 |
| 263 | AGP file 4  | 5084         | Alpha-1-acid glycoprotein 2 | ENGTVSR_7_6_1_4       | Outer                 | Outer          | 2.3235 | 0.0000 | Outer          | 6.6066 | 0.0000 |
| 264 | AGP file 4  | 15084        | Alpha-1-acid glycoprotein 2 | LVPVPITNATLDR_3_3_0_0 | None                  | None           | 3.2397 | 0.0000 | None           | 7.2872 | 0.0000 |
| 265 | AGP file 3  | 12281        | Alpha-1-acid glycoprotein 2 | LVPVPITNATLDR_3_3_0_0 | None                  | None           | 2.9565 | 0.0000 | None           | 7.2969 | 0.0000 |
| 266 | AGP file 3  | 12722        | Alpha-1-acid glycoprotein 2 | LVPVPITNATLDR_4_4_0_1 | None                  | None           | 3.4652 | 0.0000 | None           | 7.3167 | 0.0000 |
| 267 | AGP file 3  | 12725        | Alpha-1-acid glycoprotein 2 | LVPVPITNATLDR_4_4_0_1 | None                  | None           | 3.3591 | 0.0000 | None           | 7.3215 | 0.0000 |
| 268 | AGP file 3  | 15340        | Alpha-1-acid glycoprotein 2 | LVPVPITNATLDR_5_4_0_1 | None                  | None           | 2.4824 | 0.0000 | None           | 6.6993 | 0.0000 |
| 269 | AGP file 3  | 12615        | Alpha-1-acid glycoprotein 2 | LVPVPITNATLDR_5_4_0_1 | None                  | None           | 3.6730 | 0.0000 | None           | 7.3405 | 0.0000 |

Supplementary Table 7. Continued.

| No. | Experiment | CID Scan No. | N-glycoproteins             | N-glycopeptides       | Manual Classification | SVM            |        |        | DNN            |        |        |
|-----|------------|--------------|-----------------------------|-----------------------|-----------------------|----------------|--------|--------|----------------|--------|--------|
|     |            |              |                             |                       |                       | Classification | Pscore | FDR    | Classification | Pscore | FDR    |
| 270 | AGP file 4 | 14992        | Alpha-1-acid glycoprotein 2 | LVPVPITNATLDR_5_4_0_1 | None                  | None           | 1.8815 | 0.0000 | None           | 6.8777 | 0.0000 |
| 271 | AGP file 3 | 12307        | Alpha-1-acid glycoprotein 2 | LVPVPITNATLDR_5_4_0_1 | None                  | None           | 4.6543 | 0.0000 | None           | 7.3496 | 0.0000 |
| 272 | AGP file 4 | 15488        | Alpha-1-acid glycoprotein 2 | LVPVPITNATLDR_5_4_0_2 | None                  | None           | 2.3718 | 0.0000 | None           | 6.8485 | 0.0000 |
| 273 | AGP file 3 | 16069        | Alpha-1-acid glycoprotein 2 | LVPVPITNATLDR_5_4_0_2 | None                  | None           | 2.1285 | 0.0000 | None           | 7.2758 | 0.0000 |
| 274 | AGP file 3 | 15799        | Alpha-1-acid glycoprotein 2 | LVPVPITNATLDR_5_4_0_2 | None                  | None           | 4.2162 | 0.0000 | None           | 7.3316 | 0.0000 |
| 275 | AGP file 3 | 19503        | Alpha-1-acid glycoprotein 2 | LVPVPITNATLDR_5_4_0_2 | None                  | None           | 3.5128 | 0.0000 | None           | 7.3288 | 0.0000 |
| 276 | AGP file 3 | 15678        | Alpha-1-acid glycoprotein 2 | LVPVPITNATLDR_5_4_0_2 | None                  | None           | 4.8412 | 0.0000 | None           | 7.3308 | 0.0000 |
| 277 | AGP file 4 | 15381        | Alpha-1-acid glycoprotein 2 | LVPVPITNATLDR_5_4_0_2 | None                  | None           | 3.2342 | 0.0000 | None           | 7.3377 | 0.0000 |
| 278 | AGP file 3 | 15761        | Alpha-1-acid glycoprotein 2 | LVPVPITNATLDR_5_4_1_2 | Outer                 | Outer          | 5.2943 | 0.0000 | Outer          | 6.5132 | 0.0000 |
| 279 | AGP file 4 | 15367        | Alpha-1-acid glycoprotein 2 | LVPVPITNATLDR_5_4_1_2 | Outer                 | Outer          | 0.4139 | 0.0000 | Outer          | 0.6254 | 0.1400 |
| 280 | AGP file 3 | 12326        | Alpha-1-acid glycoprotein 2 | LVPVPITNATLDR_5_5_0_1 | None                  | None           | 2.5684 | 0.0000 | None           | 7.2962 | 0.0000 |
| 281 | AGP file 4 | 12020        | Alpha-1-acid glycoprotein 2 | LVPVPITNATLDR_5_5_0_1 | None                  | None           | 3.4912 | 0.0000 | None           | 7.3346 | 0.0000 |
| 282 | AGP file 3 | 15537        | Alpha-1-acid glycoprotein 2 | LVPVPITNATLDR_5_5_1_2 | Outer                 | Outer          | 1.8246 | 0.0000 | Outer          | 6.3530 | 0.0031 |
| 283 | AGP file 4 | 11892        | Alpha-1-acid glycoprotein 2 | LVPVPITNATLDR_6_5_0_1 | None                  | None           | 1.8049 | 0.0000 | None           | 7.2333 | 0.0000 |
| 284 | AGP file 3 | 12405        | Alpha-1-acid glycoprotein 2 | LVPVPITNATLDR_6_5_0_1 | None                  | None           | 1.7203 | 0.0000 | None           | 7.2270 | 0.0000 |
| 285 | AGP file 4 | 11843        | Alpha-1-acid glycoprotein 2 | LVPVPITNATLDR_6_5_0_1 | None                  | None           | 3.2816 | 0.0000 | None           | 7.3450 | 0.0000 |
| 286 | AGP file 3 | 12246        | Alpha-1-acid glycoprotein 2 | LVPVPITNATLDR_6_5_0_1 | None                  | None           | 3.9422 | 0.0000 | None           | 7.3634 | 0.0000 |
| 287 | AGP file 3 | 11939        | Alpha-1-acid glycoprotein 2 | LVPVPITNATLDR_6_5_0_1 | None                  | None           | 2.0940 | 0.0000 | None           | 7.2859 | 0.0000 |
| 288 | AGP file 3 | 15635        | Alpha-1-acid glycoprotein 2 | LVPVPITNATLDR_6_5_0_2 | None                  | None           | 3.3185 | 0.0000 | None           | 7.3311 | 0.0000 |
| 289 | AGP file 3 | 15529        | Alpha-1-acid glycoprotein 2 | LVPVPITNATLDR_6_5_0_2 | None                  | None           | 3.2763 | 0.0000 | None           | 7.3157 | 0.0000 |
| 290 | AGP file 4 | 15283        | Alpha-1-acid glycoprotein 2 | LVPVPITNATLDR_6_5_0_2 | None                  | None           | 3.3841 | 0.0000 | None           | 7.3210 | 0.0000 |
| 291 | AGP file 4 | 14929        | Alpha-1-acid glycoprotein 2 | LVPVPITNATLDR_6_5_0_2 | None                  | None           | 2.7933 | 0.0000 | None           | 7.3116 | 0.0000 |
| 292 | AGP file 4 | 15591        | Alpha-1-acid glycoprotein 2 | LVPVPITNATLDR_6_5_0_2 | None                  | None           | 2.9066 | 0.0000 | None           | 7.3189 | 0.0000 |
| 293 | AGP file 4 | 19268        | Alpha-1-acid glycoprotein 2 | LVPVPITNATLDR_6_5_0_3 | None                  | None           | 2.4622 | 0.0000 | None           | 7.2574 | 0.0000 |
| 294 | AGP file 4 | 19155        | Alpha-1-acid glycoprotein 2 | LVPVPITNATLDR_6_5_0_3 | None                  | None           | 1.8549 | 0.0000 | None           | 7.2686 | 0.0000 |
| 295 | AGP file 3 | 19311        | Alpha-1-acid glycoprotein 2 | LVPVPITNATLDR_6_5_0_3 | None                  | None           | 2.4471 | 0.0000 | None           | 7.2639 | 0.0000 |
| 296 | AGP file 4 | 18825        | Alpha-1-acid glycoprotein 2 | LVPVPITNATLDR_6_5_0_3 | None                  | None           | 1.8912 | 0.0000 | None           | 7.2658 | 0.0000 |
| 297 | AGP file 3 | 19438        | Alpha-1-acid glycoprotein 2 | LVPVPITNATLDR_6_5_0_3 | None                  | None           | 2.1768 | 0.0000 | None           | 6.9320 | 0.0000 |
| 298 | AGP file 4 | 11669        | Alpha-1-acid glycoprotein 2 | LVPVPITNATLDR_6_5_1_1 | Outer                 | Outer          | 5.4979 | 0.0000 | Outer          | 6.6080 | 0.0000 |
| 299 | AGP file 4 | 15088        | Alpha-1-acid glycoprotein 2 | LVPVPITNATLDR_6_5_1_1 | Outer                 | Outer          | 5.2104 | 0.0000 | Outer          | 6.5993 | 0.0000 |

**Supplementary Table 7. Continued.**

| No. | Experiment | CID Scan No. | N-glycoproteins             | N-glycopeptides       | Manual Classification | SVM            |        |        | DNN            |        |        |
|-----|------------|--------------|-----------------------------|-----------------------|-----------------------|----------------|--------|--------|----------------|--------|--------|
|     |            |              |                             |                       |                       | Classification | Pscore | FDR    | Classification | Pscore | FDR    |
| 300 | AGP file 3 | 12104        | Alpha-1-acid glycoprotein 2 | LVPVPITNATLDR_6_5_1_1 | Outer                 | Outer          | 1.2624 | 0.0000 | Outer          | 6.6393 | 0.0000 |
| 301 | AGP file 4 | 11993        | Alpha-1-acid glycoprotein 2 | LVPVPITNATLDR_6_5_1_1 | Outer                 | Outer          | 3.5070 | 0.0000 | Outer          | 6.6379 | 0.0000 |
| 302 | AGP file 3 | 15640        | Alpha-1-acid glycoprotein 2 | LVPVPITNATLDR_6_5_1_2 | Outer                 | Outer          | 1.6334 | 0.0000 | Outer          | 6.5857 | 0.0000 |
| 303 | AGP file 4 | 15128        | Alpha-1-acid glycoprotein 2 | LVPVPITNATLDR_6_5_1_2 | Outer                 | Outer          | 1.8161 | 0.0000 | Outer          | 6.0759 | 0.0028 |
| 304 | AGP file 4 | 15447        | Alpha-1-acid glycoprotein 2 | LVPVPITNATLDR_6_5_1_2 | Outer                 | Outer          | 2.8797 | 0.0000 | Outer          | 6.5377 | 0.0000 |
| 305 | AGP file 4 | 14800        | Alpha-1-acid glycoprotein 2 | LVPVPITNATLDR_6_5_1_2 | Outer                 | Outer          | 2.5847 | 0.0000 | Outer          | 6.4523 | 0.0000 |
| 306 | AGP file 3 | 15285        | Alpha-1-acid glycoprotein 2 | LVPVPITNATLDR_6_5_1_2 | Outer                 | Outer          | 3.2798 | 0.0000 | Outer          | 6.7226 | 0.0000 |
| 307 | AGP file 4 | 15172        | Alpha-1-acid glycoprotein 2 | LVPVPITNATLDR_6_5_1_2 | Outer                 | Outer          | 4.0865 | 0.0000 | Outer          | 6.7255 | 0.0000 |
| 308 | AGP file 4 | 14833        | Alpha-1-acid glycoprotein 2 | LVPVPITNATLDR_6_5_1_2 | Outer                 | Outer          | 0.6018 | 0.0000 | Outer          | 5.9044 | 0.0027 |
| 309 | AGP file 4 | 19281        | Alpha-1-acid glycoprotein 2 | LVPVPITNATLDR_6_5_1_3 | Outer                 | Outer          | 1.8958 | 0.0000 | Outer          | 6.5224 | 0.0000 |
| 310 | AGP file 3 | 19654        | Alpha-1-acid glycoprotein 2 | LVPVPITNATLDR_6_5_1_3 | Outer                 | Outer          | 1.5765 | 0.0000 | Outer          | 6.5194 | 0.0000 |
| 311 | AGP file 3 | 19081        | Alpha-1-acid glycoprotein 2 | LVPVPITNATLDR_6_5_1_3 | Outer                 | Outer          | 1.3989 | 0.0000 | Outer          | 6.5649 | 0.0000 |
| 312 | IgG file 7 | 6000         | Ig gamma-1 chain C region   | EEQYNSTYR_3_3_0_0     | None                  | None           | 3.6412 | 0.0000 | None           | 7.3113 | 0.0000 |
| 313 | IgG file 7 | 6058         | Ig gamma-1 chain C region   | EEQYNSTYR_3_3_1_0     | Core                  | Core           | 7.2860 | 0.0000 | Core           | 6.6321 | 0.0000 |
| 314 | IgG file 7 | 6726         | Ig gamma-1 chain C region   | EEQYNSTYR_3_3_1_0     | Core                  | Core           | 7.2997 | 0.0000 | Core           | 6.6249 | 0.0000 |
| 315 | IgG file 7 | 6394         | Ig gamma-1 chain C region   | EEQYNSTYR_3_3_1_0     | Core                  | Core           | 6.3952 | 0.0000 | Core           | 6.6356 | 0.0000 |
| 316 | IgG file 7 | 7005         | Ig gamma-1 chain C region   | EEQYNSTYR_3_3_1_0     | Core                  | Core           | 6.2576 | 0.0000 | Core           | 6.6426 | 0.0000 |
| 317 | IgG file 6 | 4370         | Ig gamma-1 chain C region   | EEQYNSTYR_3_3_1_0     | Core                  | Core           | 5.3599 | 0.0000 | Core           | 6.6353 | 0.0000 |
| 318 | IgG file 7 | 6311         | Ig gamma-1 chain C region   | EEQYNSTYR_3_4_0_0     | None                  | None           | 3.1927 | 0.0000 | None           | 7.1958 | 0.0000 |
| 319 | IgG file 7 | 6631         | Ig gamma-1 chain C region   | EEQYNSTYR_3_4_0_0     | None                  | None           | 3.2644 | 0.0000 | None           | 7.2262 | 0.0000 |
| 320 | IgG file 7 | 5973         | Ig gamma-1 chain C region   | EEQYNSTYR_3_4_0_0     | None                  | None           | 3.1210 | 0.0000 | None           | 7.1706 | 0.0000 |
| 321 | IgG file 6 | 4399         | Ig gamma-1 chain C region   | EEQYNSTYR_3_4_0_0     | None                  | None           | 2.6992 | 0.0000 | None           | 7.1853 | 0.0000 |
| 322 | IgG file 7 | 7845         | Ig gamma-1 chain C region   | EEQYNSTYR_3_4_1_0     | Core                  | Core           | 2.6563 | 0.0000 | Core           | 6.6483 | 0.0000 |
| 323 | IgG file 7 | 5295         | Ig gamma-1 chain C region   | EEQYNSTYR_3_4_1_0     | Core                  | Core           | 8.8647 | 0.0000 | Core           | 6.6145 | 0.0000 |
| 324 | IgG file 7 | 6085         | Ig gamma-1 chain C region   | EEQYNSTYR_3_4_1_0     | Core                  | Core           | 4.6632 | 0.0000 | Core           | 6.6572 | 0.0000 |
| 325 | IgG file 7 | 6421         | Ig gamma-1 chain C region   | EEQYNSTYR_3_4_1_0     | Core                  | Core           | 4.8603 | 0.0000 | Core           | 6.6559 | 0.0000 |
| 326 | IgG file 7 | 6739         | Ig gamma-1 chain C region   | EEQYNSTYR_3_4_1_0     | Core                  | Core           | 4.9418 | 0.0000 | Core           | 6.6550 | 0.0000 |
| 327 | IgG file 7 | 7490         | Ig gamma-1 chain C region   | EEQYNSTYR_3_4_1_0     | Core                  | Core           | 7.7733 | 0.0000 | Core           | 6.6148 | 0.0000 |
| 328 | IgG file 7 | 7021         | Ig gamma-1 chain C region   | EEQYNSTYR_3_4_1_0     | Core                  | Core           | 5.3999 | 0.0000 | Core           | 6.6528 | 0.0000 |
| 329 | IgG file 5 | 3033         | Ig gamma-1 chain C region   | EEQYNSTYR_3_4_1_0     | Core                  | Core           | 4.9462 | 0.0000 | Core           | 6.6571 | 0.0000 |

**Supplementary Table 7. Continued.**

| No. | Experiment | CID Scan No. | N-glycoproteins           | N-glycopeptides   | Manual Classification | SVM            |        |        | DNN            |        |        |
|-----|------------|--------------|---------------------------|-------------------|-----------------------|----------------|--------|--------|----------------|--------|--------|
|     |            |              |                           |                   |                       | Classification | Pscore | FDR    | Classification | Pscore | FDR    |
| 330 | IgG file 7 | 5764         | Ig gamma-1 chain C region | EEQYNSTYR_3_4_1_0 | Core                  | Core           | 5.9973 | 0.0000 | Core           | 6.6264 | 0.0000 |
| 331 | IgG file 7 | 7667         | Ig gamma-1 chain C region | EEQYNSTYR_3_4_1_0 | Core                  | Core           | 5.6636 | 0.0000 | Core           | 6.6374 | 0.0000 |
| 332 | IgG file 7 | 7268         | Ig gamma-1 chain C region | EEQYNSTYR_3_4_1_0 | Core                  | Core           | 9.2273 | 0.0000 | Core           | 6.6165 | 0.0000 |
| 333 | IgG file 7 | 8322         | Ig gamma-1 chain C region | EEQYNSTYR_3_4_1_0 | Core                  | Core           | 6.2623 | 0.0000 | Core           | 6.6217 | 0.0000 |
| 334 | IgG file 7 | 7954         | Ig gamma-1 chain C region | EEQYNSTYR_3_5_0_0 | None                  | None           | 1.9710 | 0.0000 | None           | 7.2589 | 0.0000 |
| 335 | IgG file 7 | 8666         | Ig gamma-1 chain C region | EEQYNSTYR_3_5_1_0 | Core                  | Core           | 4.4717 | 0.0000 | Core           | 6.6355 | 0.0000 |
| 336 | IgG file 6 | 4420         | Ig gamma-1 chain C region | EEQYNSTYR_3_5_1_0 | Core                  | Core           | 4.1869 | 0.0000 | Core           | 6.6615 | 0.0000 |
| 337 | IgG file 7 | 8314         | Ig gamma-1 chain C region | EEQYNSTYR_3_5_1_0 | Core                  | Core           | 3.9949 | 0.0000 | Core           | 6.6395 | 0.0000 |
| 338 | IgG file 7 | 6199         | Ig gamma-1 chain C region | EEQYNSTYR_4_3_1_0 | Core                  | Core           | 5.9024 | 0.0000 | Core           | 6.6097 | 0.0000 |
| 339 | IgG file 7 | 6537         | Ig gamma-1 chain C region | EEQYNSTYR_4_3_1_0 | Core                  | Core           | 6.4891 | 0.0000 | Core           | 6.6036 | 0.0000 |
| 340 | IgG file 6 | 4360         | Ig gamma-1 chain C region | EEQYNSTYR_4_4_0_0 | None                  | None           | 3.1797 | 0.0000 | None           | 7.0988 | 0.0000 |
| 341 | IgG file 7 | 5761         | Ig gamma-1 chain C region | EEQYNSTYR_4_4_0_0 | None                  | None           | 3.2073 | 0.0000 | None           | 7.1274 | 0.0000 |
| 342 | IgG file 7 | 6089         | Ig gamma-1 chain C region | EEQYNSTYR_4_4_0_0 | None                  | None           | 3.1204 | 0.0000 | None           | 7.0755 | 0.0000 |
| 343 | IgG file 7 | 6427         | Ig gamma-1 chain C region | EEQYNSTYR_4_4_0_0 | None                  | None           | 2.9278 | 0.0000 | None           | 6.8487 | 0.0000 |
| 344 | IgG file 6 | 4341         | Ig gamma-1 chain C region | EEQYNSTYR_4_4_1_0 | Core                  | Core           | 7.4169 | 0.0000 | Core           | 6.6368 | 0.0000 |
| 345 | IgG file 7 | 5171         | Ig gamma-1 chain C region | EEQYNSTYR_4_4_1_0 | Core                  | Core           | 1.2775 | 0.0000 | Core           | 6.5712 | 0.0000 |
| 346 | IgG file 7 | 5650         | Ig gamma-1 chain C region | EEQYNSTYR_4_4_1_0 | Core                  | Core           | 5.3142 | 0.0000 | Core           | 6.5710 | 0.0000 |
| 347 | IgG file 7 | 6917         | Ig gamma-1 chain C region | EEQYNSTYR_4_4_1_0 | Core                  | Core           | 5.3699 | 0.0000 | Core           | 6.5822 | 0.0000 |
| 348 | IgG file 7 | 5940         | Ig gamma-1 chain C region | EEQYNSTYR_4_4_1_0 | Core                  | Core           | 3.5219 | 0.0000 | Core           | 6.5807 | 0.0000 |
| 349 | IgG file 7 | 8525         | Ig gamma-1 chain C region | EEQYNSTYR_4_4_1_0 | Core                  | Core           | 1.5077 | 0.0000 | Core           | 6.5787 | 0.0000 |
| 350 | IgG file 7 | 6616         | Ig gamma-1 chain C region | EEQYNSTYR_4_4_1_0 | Core                  | Core           | 5.2990 | 0.0000 | Core           | 6.5818 | 0.0000 |
| 351 | IgG file 7 | 7164         | Ig gamma-1 chain C region | EEQYNSTYR_4_4_1_0 | Core                  | Core           | 5.8877 | 0.0000 | Core           | 6.5805 | 0.0000 |
| 352 | IgG file 7 | 6278         | Ig gamma-1 chain C region | EEQYNSTYR_4_4_1_0 | Core                  | Core           | 4.5810 | 0.0000 | Core           | 6.5806 | 0.0000 |
| 353 | IgG file 5 | 3064         | Ig gamma-1 chain C region | EEQYNSTYR_4_4_1_0 | Core                  | Core           | 3.1976 | 0.0000 | Core           | 6.5808 | 0.0000 |
| 354 | IgG file 7 | 7396         | Ig gamma-1 chain C region | EEQYNSTYR_4_4_1_0 | Core                  | Core           | 6.2345 | 0.0000 | Core           | 6.5788 | 0.0000 |
| 355 | IgG file 6 | 4339         | Ig gamma-1 chain C region | EEQYNSTYR_4_4_1_0 | Core                  | Core           | 4.9840 | 0.0000 | Core           | 6.5810 | 0.0000 |
| 356 | IgG file 7 | 9802         | Ig gamma-1 chain C region | EEQYNSTYR_4_4_1_1 | Core                  | Core           | 2.9034 | 0.0000 | Core           | 6.6325 | 0.0000 |
| 357 | IgG file 7 | 9812         | Ig gamma-1 chain C region | EEQYNSTYR_4_4_1_1 | Core                  | Core           | 2.0546 | 0.0000 | Core           | 5.3545 | 0.0026 |
| 358 | IgG file 6 | 4424         | Ig gamma-1 chain C region | EEQYNSTYR_4_5_1_0 | Core                  | Core           | 5.3954 | 0.0000 | Core           | 6.6065 | 0.0000 |
| 359 | IgG file 7 | 8461         | Ig gamma-1 chain C region | EEQYNSTYR_4_5_1_0 | Core                  | Core           | 4.2298 | 0.0000 | Core           | 6.6149 | 0.0000 |

Supplementary Table 7. Continued.

| No. | Experiment | CID Scan No. | N-glycoproteins           | N-glycopeptides   | Manual Classification | SVM            |        |        | DNN            |        |        |
|-----|------------|--------------|---------------------------|-------------------|-----------------------|----------------|--------|--------|----------------|--------|--------|
|     |            |              |                           |                   |                       | Classification | Pscore | FDR    | Classification | Pscore | FDR    |
| 360 | IgG file 7 | 5975         | Ig gamma-1 chain C region | EEQYNSTYR_5_4_0_0 | None                  | None           | 2.7983 | 0.0000 | None           | 6.7457 | 0.0000 |
| 361 | IgG file 5 | 3029         | Ig gamma-1 chain C region | EEQYNSTYR_5_4_1_0 | Core                  | Core           | 4.9060 | 0.0000 | Core           | 6.6062 | 0.0000 |
| 362 | IgG file 7 | 6087         | Ig gamma-1 chain C region | EEQYNSTYR_5_4_1_0 | Core                  | Core           | 3.3486 | 0.0000 | Core           | 6.6131 | 0.0000 |
| 363 | IgG file 7 | 6423         | Ig gamma-1 chain C region | EEQYNSTYR_5_4_1_0 | Core                  | Core           | 3.7240 | 0.0000 | Core           | 6.6136 | 0.0000 |
| 364 | IgG file 7 | 6741         | Ig gamma-1 chain C region | EEQYNSTYR_5_4_1_0 | Core                  | Core           | 3.7266 | 0.0000 | Core           | 6.6135 | 0.0000 |
| 365 | IgG file 7 | 9750         | Ig gamma-1 chain C region | EEQYNSTYR_5_4_1_1 | Core                  | Core           | 1.1998 | 0.0000 | Core           | 6.6489 | 0.0000 |
| 366 | IgG file 6 | 4859         | Ig gamma-1 chain C region | EEQYNSTYR_5_4_1_1 | Core                  | Core           | 3.6351 | 0.0000 | Core           | 6.6036 | 0.0000 |
| 367 | IgG file 7 | 9769         | Ig gamma-1 chain C region | EEQYNSTYR_5_4_1_1 | Core                  | Core           | 2.6271 | 0.0000 | Core           | 6.6036 | 0.0000 |
| 368 | IgG file 7 | 10599        | Ig gamma-2 chain C region | EEQFNSTFR_3_3_1_0 | Core                  | Core           | 4.1634 | 0.0000 | Core           | 6.6630 | 0.0000 |
| 369 | IgG file 7 | 10686        | Ig gamma-2 chain C region | EEQFNSTFR_3_4_0_0 | None                  | None           | 2.9952 | 0.0000 | None           | 7.1198 | 0.0000 |
| 370 | IgG file 5 | 3427         | Ig gamma-2 chain C region | EEQFNSTFR_3_4_1_0 | Core                  | Core           | 6.5825 | 0.0000 | Core           | 6.6391 | 0.0000 |
| 371 | IgG file 7 | 10461        | Ig gamma-2 chain C region | EEQFNSTFR_3_4_1_0 | Core                  | Core           | 4.8434 | 0.0000 | Core           | 6.6577 | 0.0000 |
| 372 | IgG file 7 | 10811        | Ig gamma-2 chain C region | EEQFNSTFR_3_4_1_0 | Core                  | Core           | 5.3358 | 0.0000 | Core           | 6.6482 | 0.0000 |
| 373 | IgG file 7 | 10689        | Ig gamma-2 chain C region | EEQFNSTFR_3_5_1_0 | Core                  | Core           | 0.2593 | 0.0176 | Core           | 6.6569 | 0.0000 |
| 374 | IgG file 7 | 10691        | Ig gamma-2 chain C region | EEQFNSTFR_3_5_1_0 | Core                  | Core           | 4.8757 | 0.0000 | Core           | 6.6418 | 0.0000 |
| 375 | IgG file 5 | 3453         | Ig gamma-2 chain C region | EEQFNSTFR_3_5_1_0 | Core                  | Core           | 5.9495 | 0.0000 | Core           | 6.6219 | 0.0000 |
| 376 | IgG file 7 | 10581        | Ig gamma-2 chain C region | EEQFNSTFR_4_3_1_0 | Core                  | Core           | 5.7542 | 0.0000 | Core           | 6.6301 | 0.0000 |
| 377 | IgG file 7 | 10655        | Ig gamma-2 chain C region | EEQFNSTFR_4_4_0_0 | None                  | None           | 3.0965 | 0.0000 | None           | 7.1944 | 0.0000 |
| 378 | IgG file 5 | 3408         | Ig gamma-2 chain C region | EEQFNSTFR_4_4_1_0 | Core                  | Core           | 5.4044 | 0.0000 | Core           | 6.6409 | 0.0000 |
| 379 | IgG file 7 | 10720        | Ig gamma-2 chain C region | EEQFNSTFR_4_4_1_0 | Core                  | Core           | 3.8331 | 0.0000 | Core           | 6.6409 | 0.0000 |
| 380 | IgG file 6 | 6063         | Ig gamma-2 chain C region | EEQFNSTFR_4_4_1_0 | Core                  | Core           | 6.8782 | 0.0000 | Core           | 6.6053 | 0.0000 |
| 381 | IgG file 7 | 10382        | Ig gamma-2 chain C region | EEQFNSTFR_4_4_1_0 | Core                  | Core           | 4.8075 | 0.0000 | Core           | 6.6129 | 0.0000 |
| 382 | IgG file 6 | 5157         | Ig gamma-2 chain C region | EEQFNSTFR_4_4_1_0 | Core                  | Core           | 7.8828 | 0.0000 | Core           | 6.6250 | 0.0000 |
| 383 | IgG file 7 | 10722        | Ig gamma-2 chain C region | EEQFNSTFR_4_4_1_0 | Core                  | Core           | 7.1532 | 0.0000 | Core           | 6.6384 | 0.0000 |
| 384 | IgG file 7 | 12133        | Ig gamma-2 chain C region | EEQFNSTFR_4_4_1_1 | Core                  | Core           | 0.9195 | 0.0000 | Core           | 6.6716 | 0.0000 |
| 385 | IgG file 5 | 3739         | Ig gamma-2 chain C region | EEQFNSTFR_4_4_1_1 | Core                  | Core           | 4.8480 | 0.0000 | Core           | 6.6248 | 0.0000 |
| 386 | IgG file 7 | 12154        | Ig gamma-2 chain C region | EEQFNSTFR_4_4_1_1 | Core                  | Core           | 4.8266 | 0.0000 | Core           | 6.6319 | 0.0000 |
| 387 | IgG file 5 | 3735         | Ig gamma-2 chain C region | EEQFNSTFR_4_4_1_1 | Core                  | Core           | 0.8882 | 0.0000 | Core           | 6.6437 | 0.0000 |
| 388 | IgG file 7 | 10653        | Ig gamma-2 chain C region | EEQFNSTFR_4_5_1_0 | Core                  | Core           | 4.1761 | 0.0000 | Core           | 6.6167 | 0.0000 |
| 389 | IgG file 5 | 3400         | Ig gamma-2 chain C region | EEQFNSTFR_5_4_1_0 | Core                  | Core           | 3.1527 | 0.0000 | Core           | 6.6149 | 0.0000 |

**Supplementary Table 7.** Continued.

| No. | Experiment | CID Scan No. | N-glycoproteins           | N-glycopeptides   | Manual Classification | SVM            |        |        | DNN            |        |        |
|-----|------------|--------------|---------------------------|-------------------|-----------------------|----------------|--------|--------|----------------|--------|--------|
|     |            |              |                           |                   |                       | Classification | Pscore | FDR    | Classification | Pscore | FDR    |
| 390 | IgG file 7 | 10548        | Ig gamma-2 chain C region | EEQFNSTFR_5_4_1_0 | Core                  | Core           | 3.6594 | 0.0000 | Core           | 6.6115 | 0.0000 |
| 391 | IgG file 7 | 12088        | Ig gamma-2 chain C region | EEQFNSTFR_5_4_1_1 | Core                  | Core           | 2.7501 | 0.0000 | Core           | 6.5970 | 0.0000 |
| 392 | IgG file 7 | 9711         | Ig gamma-4 chain C region | EEQFNSTYR_3_4_1_0 | Core                  | Core           | 5.9052 | 0.0000 | Core           | 6.6478 | 0.0000 |
| 393 | IgG file 7 | 9698         | Ig gamma-4 chain C region | EEQFNSTYR_4_4_1_0 | Core                  | Core           | 6.5022 | 0.0000 | Core           | 6.6204 | 0.0000 |

**Supplementary Table 8.** Glycopeptide spectrum matches of human plasma proteins and their Classification as unknown set for machine learning.

| No. | Experiment         | CID Scan No. | N-glycoproteins             | N-glycopeptides       | SVM            |        |        | DNN            |        |        | Manual Classification |
|-----|--------------------|--------------|-----------------------------|-----------------------|----------------|--------|--------|----------------|--------|--------|-----------------------|
|     |                    |              |                             |                       | Classification | Pscore | FDR    | Classification | Pscore | FDR    |                       |
| 1   | Human Plasma exp_1 | 18962        | Afamin                      | DIENFNSTQK_5_4_0_2    | None           | 3.2012 | 0.0000 | None           | 7.3120 | 0.0000 | None                  |
| 2   | Human Plasma exp_1 | 18960        | Afamin                      | DIENFNSTQK_5_4_0_2    | None           | 3.5642 | 0.0000 | None           | 7.2777 | 0.0000 | None                  |
| 3   | Human Plasma exp_1 | 18914        | Afamin                      | DIENFNSTQK_5_4_0_2    | None           | 1.9651 | 0.0000 | None           | 6.8079 | 0.0000 | None                  |
| 4   | Human Plasma exp_2 | 19315        | Afamin                      | DIENFNSTQK_5_4_0_2    | None           | 3.3896 | 0.0000 | None           | 7.3153 | 0.0000 | None                  |
| 5   | Human Plasma exp_2 | 19360        | Afamin                      | DIENFNSTQK_5_4_0_2    | None           | 3.4571 | 0.0000 | None           | 7.2888 | 0.0000 | None                  |
| 6   | Human Plasma exp_2 | 19306        | Afamin                      | DIENFNSTQK_5_4_0_2    | None           | 2.5595 | 0.0000 | None           | 6.7730 | 0.0000 | None                  |
| 7   | Human Plasma exp_3 | 18842        | Afamin                      | DIENFNSTQK_5_4_0_2    | None           | 3.5056 | 0.0000 | None           | 7.3175 | 0.0000 | None                  |
| 8   | Human Plasma exp_4 | 19406        | Afamin                      | DIENFNSTQK_5_4_0_2    | None           | 4.0013 | 0.0000 | None           | 7.3251 | 0.0000 | None                  |
| 9   | Human Plasma exp_4 | 19448        | Afamin                      | DIENFNSTQK_5_4_0_2    | None           | 3.1897 | 0.0000 | None           | 7.2668 | 0.0000 | None                  |
| 10  | Human Plasma exp_5 | 19011        | Afamin                      | DIENFNSTQK_5_4_0_2    | None           | 3.7351 | 0.0000 | None           | 7.3198 | 0.0000 | None                  |
| 11  | Human Plasma exp_5 | 19135        | Afamin                      | DIENFNSTQK_5_4_0_2    | None           | 2.6304 | 0.0000 | None           | 7.2599 | 0.0000 | None                  |
| 12  | Human Plasma exp_5 | 18647        | Afamin                      | DIENFNSTQK_5_4_1_2    | Dual           | 0.1881 | 0.1810 | Core           | 6.3430 | 0.0032 | Core                  |
| 13  | Human Plasma exp_3 | 8213         | Afamin                      | FNETTEK_5_4_0_2       | None           | 3.0869 | 0.0000 | None           | 7.2829 | 0.0000 | None                  |
| 14  | Human Plasma exp_5 | 7958         | Afamin                      | FNETTEK_5_4_0_2       | None           | 3.0948 | 0.0000 | None           | 7.2578 | 0.0000 | None                  |
| 15  | Human Plasma exp_5 | 12730        | Afamin                      | FNETTEK_6_5_0_3       | None           | 2.3051 | 0.0000 | None           | 7.2603 | 0.0000 | None                  |
| 16  | Human Plasma exp_1 | 1509         | Afamin                      | HNFSHCCSK_5_4_0_2     | None           | 3.3609 | 0.0000 | None           | 7.3389 | 0.0000 | None                  |
| 17  | Human Plasma exp_2 | 1548         | Afamin                      | HNFSHCCSK_5_4_0_2     | None           | 3.2901 | 0.0000 | None           | 7.3373 | 0.0000 | None                  |
| 18  | Human Plasma exp_4 | 1590         | Afamin                      | HNFSHCCSK_5_4_0_2     | None           | 2.2217 | 0.0000 | None           | 7.3754 | 0.0000 | None                  |
| 19  | Human Plasma exp_5 | 1488         | Afamin                      | HNFSHCCSK_5_4_0_2     | None           | 3.3968 | 0.0000 | None           | 7.3404 | 0.0000 | None                  |
| 20  | Human Plasma exp_5 | 1492         | Afamin                      | HNFSHCCSK_5_4_0_2     | None           | 2.1302 | 0.0000 | None           | 7.3795 | 0.0000 | None                  |
| 21  | Human Plasma exp_1 | 13729        | Afamin                      | NCCNTENPPGCYR_5_4_0_2 | None           | 3.5782 | 0.0000 | None           | 7.3416 | 0.0000 | None                  |
| 22  | Human Plasma exp_1 | 13720        | Afamin                      | NCCNTENPPGCYR_5_4_0_2 | None           | 1.5136 | 0.0000 | None           | 7.2859 | 0.0000 | None                  |
| 23  | Human Plasma exp_4 | 13975        | Afamin                      | NCCNTENPPGCYR_5_4_0_2 | None           | 4.1851 | 0.0000 | None           | 7.3504 | 0.0000 | None                  |
| 24  | Human Plasma exp_4 | 13811        | Afamin                      | NCCNTENPPGCYR_5_4_0_2 | None           | 2.4856 | 0.0000 | None           | 7.2729 | 0.0000 | None                  |
| 25  | Human Plasma exp_1 | 5154         | Alpha-1-acid glycoprotein 1 | ENGTISR_5_4_0_2       | None           | 2.6100 | 0.0000 | None           | 7.2676 | 0.0000 | None                  |
| 26  | Human Plasma exp_2 | 5244         | Alpha-1-acid glycoprotein 1 | ENGTISR_5_4_0_2       | None           | 2.7767 | 0.0000 | None           | 7.2817 | 0.0000 | None                  |
| 27  | Human Plasma exp_3 | 5199         | Alpha-1-acid glycoprotein 1 | ENGTISR_5_4_0_2       | None           | 3.6014 | 0.0000 | None           | 7.2918 | 0.0000 | None                  |
| 28  | Human Plasma exp_4 | 5332         | Alpha-1-acid glycoprotein 1 | ENGTISR_5_4_0_2       | None           | 3.4008 | 0.0000 | None           | 7.2785 | 0.0000 | None                  |
| 29  | Human Plasma exp_5 | 5195         | Alpha-1-acid glycoprotein 1 | ENGTISR_5_4_0_2       | None           | 3.0890 | 0.0000 | None           | 7.2765 | 0.0000 | None                  |
| 30  | Human Plasma exp_1 | 5094         | Alpha-1-acid glycoprotein 1 | ENGTISR_5_4_1_2       | Outer          | 1.0780 | 0.0000 | Outer          | 6.6303 | 0.0000 | Outer                 |



**Supplementary Table 8. Continued.**

| No. | Experiment         | CID Scan No. | N-glycoproteins             | N-glycopeptides           | SVM            |        |        | DNN            |        |        | Manual Classification |
|-----|--------------------|--------------|-----------------------------|---------------------------|----------------|--------|--------|----------------|--------|--------|-----------------------|
|     |                    |              |                             |                           | Classification | Pscore | FDR    | Classification | Pscore | FDR    |                       |
| 31  | Human Plasma exp_2 | 5202         | Alpha-1-acid glycoprotein 1 | ENGTISR_5_4_1_2           | Outer          | 4.0159 | 0.0000 | Outer          | 6.7188 | 0.0000 | Outer                 |
| 32  | Human Plasma exp_5 | 5163         | Alpha-1-acid glycoprotein 1 | ENGTISR_5_4_1_2           | Outer          | 0.2813 | 0.0858 | Outer          | 4.2881 | 0.0061 | Outer                 |
| 33  | Human Plasma exp_2 | 9286         | Alpha-1-acid glycoprotein 1 | ENGTISR_6_5_0_3           | None           | 1.1873 | 0.0000 | None           | 7.2128 | 0.0000 | None                  |
| 34  | Human Plasma exp_3 | 9084         | Alpha-1-acid glycoprotein 1 | ENGTISR_6_5_0_3           | None           | 2.2484 | 0.0000 | None           | 7.2825 | 0.0000 | None                  |
| 35  | Human Plasma exp_4 | 9253         | Alpha-1-acid glycoprotein 1 | ENGTISR_6_5_0_3           | None           | 2.1273 | 0.0000 | None           | 7.2272 | 0.0000 | None                  |
| 36  | Human Plasma exp_1 | 9587         | Alpha-1-acid glycoprotein 1 | ENGTISR_6_5_1_3           | Outer          | 1.2482 | 0.0000 | Outer          | 6.5134 | 0.0017 | Outer                 |
| 37  | Human Plasma exp_2 | 8919         | Alpha-1-acid glycoprotein 1 | ENGTISR_6_5_1_3           | Outer          | 2.7763 | 0.0000 | Outer          | 6.6696 | 0.0000 | Outer                 |
| 38  | Human Plasma exp_3 | 8894         | Alpha-1-acid glycoprotein 1 | ENGTISR_6_5_1_3           | Outer          | 3.3595 | 0.0000 | Outer          | 6.6970 | 0.0000 | Outer                 |
| 39  | Human Plasma exp_3 | 9871         | Alpha-1-acid glycoprotein 1 | ENGTISR_6_5_1_3           | Outer          | 2.0662 | 0.0000 | Outer          | 5.6884 | 0.0031 | Outer                 |
| 40  | Human Plasma exp_4 | 8976         | Alpha-1-acid glycoprotein 1 | ENGTISR_6_5_1_3           | Outer          | 3.2726 | 0.0000 | Outer          | 6.6990 | 0.0000 | Outer                 |
| 41  | Human Plasma exp_4 | 9141         | Alpha-1-acid glycoprotein 1 | ENGTISR_6_5_1_3           | Outer          | 4.3364 | 0.0000 | Outer          | 6.4326 | 0.0033 | Outer                 |
| 42  | Human Plasma exp_5 | 8869         | Alpha-1-acid glycoprotein 1 | ENGTISR_6_5_1_3           | Outer          | 2.8203 | 0.0000 | Outer          | 6.6410 | 0.0000 | Outer                 |
| 43  | Human Plasma exp_5 | 9219         | Alpha-1-acid glycoprotein 1 | ENGTISR_6_5_1_3           | Outer          | 2.9746 | 0.0000 | Outer          | 6.4676 | 0.0033 | Outer                 |
| 44  | Human Plasma exp_3 | 14454        | Alpha-1-acid glycoprotein 1 | ENGTISR_7_6_1_4           | Outer          | 1.4333 | 0.0000 | Outer          | 6.4557 | 0.0033 | Outer                 |
| 45  | Human Plasma exp_4 | 13885        | Alpha-1-acid glycoprotein 1 | ENGTISR_7_6_1_4           | Outer          | 2.0714 | 0.0000 | Outer          | 6.6534 | 0.0000 | Outer                 |
| 46  | Human Plasma exp_5 | 14875        | Alpha-1-acid glycoprotein 1 | ENGTISR_7_6_1_4           | Outer          | 2.3154 | 0.0000 | Outer          | 6.6387 | 0.0000 | Outer                 |
| 47  | Human Plasma exp_2 | 13822        | Alpha-1-acid glycoprotein 1 | ENGTISR_7_6_2_4           | Outer          | 0.2657 | 0.0921 | Outer          | 1.9847 | 0.0177 | Outer                 |
| 48  | Human Plasma exp_3 | 14493        | Alpha-1-acid glycoprotein 1 | ENGTISR_7_6_2_4           | Dual           | 0.1916 | 0.1771 | Outer          | 5.2620 | 0.0031 | Outer                 |
| 49  | Human Plasma exp_4 | 14741        | Alpha-1-acid glycoprotein 1 | ENGTISR_7_6_2_4           | Outer          | 0.1713 | 0.2027 | Outer          | 5.8597 | 0.0031 | Outer                 |
| 50  | Human Plasma exp_5 | 13807        | Alpha-1-acid glycoprotein 1 | ENGTISR_7_6_2_4           | Outer          | 0.1136 | 0.2801 | Outer          | 1.4068 | 0.0249 | Outer                 |
| 51  | Human Plasma exp_5 | 14153        | Alpha-1-acid glycoprotein 1 | ENGTISR_7_6_3_4           | Outer          | 0.1204 | 0.2733 | Outer          | 0.2167 | 0.3628 | Outer                 |
| 52  | Human Plasma exp_2 | 30047        | Alpha-1-acid glycoprotein 1 | LVPVPITNATLDQITGK_5_4_0_1 | None           | 3.0847 | 0.0000 | None           | 7.3419 | 0.0000 | None                  |
| 53  | Human Plasma exp_3 | 29500        | Alpha-1-acid glycoprotein 1 | LVPVPITNATLDQITGK_5_4_0_1 | None           | 3.4294 | 0.0000 | None           | 7.3580 | 0.0000 | None                  |
| 54  | Human Plasma exp_4 | 29784        | Alpha-1-acid glycoprotein 1 | LVPVPITNATLDQITGK_5_4_0_1 | None           | 3.5042 | 0.0000 | None           | 7.3278 | 0.0000 | None                  |
| 55  | Human Plasma exp_4 | 31478        | Alpha-1-acid glycoprotein 1 | LVPVPITNATLDQITGK_5_4_0_2 | None           | 4.5559 | 0.0000 | None           | 7.3381 | 0.0000 | None                  |
| 56  | Human Plasma exp_1 | 32456        | Alpha-1-acid glycoprotein 1 | LVPVPITNATLDQITGK_6_5_0_3 | None           | 2.1446 | 0.0000 | None           | 7.2666 | 0.0000 | None                  |
| 57  | Human Plasma exp_4 | 33045        | Alpha-1-acid glycoprotein 1 | LVPVPITNATLDQITGK_6_5_0_3 | None           | 2.7519 | 0.0000 | None           | 7.2864 | 0.0000 | None                  |
| 58  | Human Plasma exp_1 | 30786        | Alpha-1-acid glycoprotein 1 | LVPVPITNATLDQITGK_6_5_1_2 | Outer          | 4.9940 | 0.0000 | Outer          | 6.6917 | 0.0000 | Outer                 |
| 59  | Human Plasma exp_4 | 31353        | Alpha-1-acid glycoprotein 1 | LVPVPITNATLDQITGK_6_5_1_2 | Outer          | 2.5814 | 0.0000 | Outer          | 6.7524 | 0.0000 | Outer                 |
| 60  | Human Plasma exp_4 | 32977        | Alpha-1-acid glycoprotein 1 | LVPVPITNATLDQITGK_6_5_1_3 | Outer          | 4.2956 | 0.0000 | Outer          | 6.5843 | 0.0017 | Outer                 |

**Supplementary Table 8. Continued.**

| No. | Experiment         | CID Scan No. | N-glycoproteins               | N-glycopeptides         | SVM            |        |        | DNN            |        |        | Manual Classification |
|-----|--------------------|--------------|-------------------------------|-------------------------|----------------|--------|--------|----------------|--------|--------|-----------------------|
|     |                    |              |                               |                         | Classification | Pscore | FDR    | Classification | Pscore | FDR    |                       |
| 61  | Human Plasma exp_2 | 27598        | Alpha-1-acid glycoprotein 1   | QDQCIYNTTYLNVQR_5_4_0_2 | None           | 2.9614 | 0.0000 | None           | 7.2824 | 0.0000 | None                  |
| 62  | Human Plasma exp_3 | 27020        | Alpha-1-acid glycoprotein 1   | QDQCIYNTTYLNVQR_5_4_0_2 | None           | 3.1501 | 0.0000 | None           | 7.3254 | 0.0000 | None                  |
| 63  | Human Plasma exp_1 | 29130        | Alpha-1-acid glycoprotein 1   | QDQCIYNTTYLNVQR_6_5_0_3 | None           | 2.0247 | 0.0000 | None           | 7.2639 | 0.0000 | None                  |
| 64  | Human Plasma exp_2 | 29848        | Alpha-1-acid glycoprotein 1   | QDQCIYNTTYLNVQR_6_5_0_3 | None           | 1.6573 | 0.0000 | None           | 7.2715 | 0.0000 | None                  |
| 65  | Human Plasma exp_4 | 29531        | Alpha-1-acid glycoprotein 1   | QDQCIYNTTYLNVQR_6_5_1_3 | Outer          | 0.6920 | 0.0032 | Outer          | 5.7018 | 0.0031 | Outer                 |
| 66  | Human Plasma exp_1 | 4603         | Alpha-1-acid glycoprotein 1,2 | NEEYNK_5_4_0_2          | None           | 3.7823 | 0.0000 | None           | 7.3031 | 0.0000 | None                  |
| 67  | Human Plasma exp_2 | 4672         | Alpha-1-acid glycoprotein 1,2 | NEEYNK_5_4_0_2          | None           | 3.4410 | 0.0000 | None           | 7.2947 | 0.0000 | None                  |
| 68  | Human Plasma exp_3 | 4633         | Alpha-1-acid glycoprotein 1,2 | NEEYNK_5_4_0_2          | None           | 3.6109 | 0.0000 | None           | 7.2805 | 0.0000 | None                  |
| 69  | Human Plasma exp_4 | 4752         | Alpha-1-acid glycoprotein 1,2 | NEEYNK_5_4_0_2          | None           | 3.4622 | 0.0000 | None           | 7.2965 | 0.0000 | None                  |
| 70  | Human Plasma exp_5 | 4319         | Alpha-1-acid glycoprotein 1,2 | NEEYNK_5_4_0_2          | None           | 3.0577 | 0.0000 | None           | 7.2091 | 0.0000 | None                  |
| 71  | Human Plasma exp_1 | 4396         | Alpha-1-acid glycoprotein 1,2 | NEEYNK_5_4_1_2          | Core           | 3.4686 | 0.0000 | Core           | 6.6267 | 0.0000 | Core                  |
| 72  | Human Plasma exp_2 | 4457         | Alpha-1-acid glycoprotein 1,2 | NEEYNK_5_4_1_2          | Core           | 2.9747 | 0.0000 | Core           | 6.6269 | 0.0000 | Core                  |
| 73  | Human Plasma exp_3 | 4410         | Alpha-1-acid glycoprotein 1,2 | NEEYNK_5_4_1_2          | Core           | 2.8859 | 0.0000 | Core           | 6.6165 | 0.0000 | Core                  |
| 74  | Human Plasma exp_4 | 4528         | Alpha-1-acid glycoprotein 1,2 | NEEYNK_5_4_1_2          | Core           | 2.9694 | 0.0000 | Core           | 6.6094 | 0.0019 | Core                  |
| 75  | Human Plasma exp_5 | 4414         | Alpha-1-acid glycoprotein 1,2 | NEEYNK_5_4_1_2          | Core           | 2.6675 | 0.0000 | Core           | 6.6103 | 0.0019 | Core                  |
| 76  | Human Plasma exp_2 | 4828         | Alpha-1-acid glycoprotein 1,2 | NEEYNK_6_5_0_2          | None           | 1.5338 | 0.0000 | None           | 7.2905 | 0.0000 | None                  |
| 77  | Human Plasma exp_4 | 4472         | Alpha-1-acid glycoprotein 1,2 | NEEYNK_6_5_0_2          | None           | 2.9817 | 0.0000 | None           | 7.2938 | 0.0000 | None                  |
| 78  | Human Plasma exp_1 | 8272         | Alpha-1-acid glycoprotein 1,2 | NEEYNK_6_5_0_3          | None           | 1.8533 | 0.0000 | None           | 7.2729 | 0.0000 | None                  |
| 79  | Human Plasma exp_3 | 7818         | Alpha-1-acid glycoprotein 1,2 | NEEYNK_6_5_0_3          | None           | 1.2373 | 0.0000 | None           | 7.2477 | 0.0000 | None                  |
| 80  | Human Plasma exp_2 | 4012         | Alpha-1-acid glycoprotein 1,2 | NEEYNK_6_5_1_2          | Outer          | 0.5440 | 0.0292 | Outer          | 5.5776 | 0.0031 | Outer                 |
| 81  | Human Plasma exp_4 | 4103         | Alpha-1-acid glycoprotein 1,2 | NEEYNK_6_5_1_2          | Outer          | 2.2726 | 0.0000 | Outer          | 6.6604 | 0.0000 | Outer                 |
| 82  | Human Plasma exp_5 | 3982         | Alpha-1-acid glycoprotein 1,2 | NEEYNK_6_5_1_2          | Outer          | 1.2642 | 0.0000 | Outer          | 6.4002 | 0.0033 | Outer                 |
| 83  | Human Plasma exp_1 | 7468         | Alpha-1-acid glycoprotein 1,2 | NEEYNK_6_5_1_3          | Outer          | 3.1711 | 0.0000 | Outer          | 6.4142 | 0.0033 | Outer                 |
| 84  | Human Plasma exp_2 | 7865         | Alpha-1-acid glycoprotein 1,2 | NEEYNK_6_5_1_3          | Outer          | 2.2443 | 0.0000 | Outer          | 6.6509 | 0.0000 | Outer                 |
| 85  | Human Plasma exp_2 | 7608         | Alpha-1-acid glycoprotein 1,2 | NEEYNK_6_5_1_3          | Outer          | 2.9128 | 0.0000 | Outer          | 6.2643 | 0.0032 | Outer                 |
| 86  | Human Plasma exp_3 | 8517         | Alpha-1-acid glycoprotein 1,2 | NEEYNK_6_5_1_3          | Outer          | 3.5965 | 0.0000 | Outer          | 6.4410 | 0.0033 | Outer                 |
| 87  | Human Plasma exp_4 | 7652         | Alpha-1-acid glycoprotein 1,2 | NEEYNK_6_5_1_3          | Outer          | 3.5117 | 0.0000 | Outer          | 6.3945 | 0.0033 | Outer                 |
| 88  | Human Plasma exp_5 | 7660         | Alpha-1-acid glycoprotein 1,2 | NEEYNK_6_5_1_3          | Outer          | 1.8211 | 0.0000 | Outer          | 6.6535 | 0.0000 | Outer                 |
| 89  | Human Plasma exp_5 | 7574         | Alpha-1-acid glycoprotein 1,2 | NEEYNK_6_5_1_3          | Outer          | 3.0580 | 0.0000 | Outer          | 6.4663 | 0.0033 | Outer                 |
| 90  | Human Plasma exp_1 | 7814         | Alpha-1-acid glycoprotein 1,2 | NEEYNK_6_5_2_3          | Dual           | 2.7445 | 0.0000 | Dual           | 6.3752 | 0.0033 | Dual                  |

**Supplementary Table 8. Continued.**

| No. | Experiment         | CID Scan No. | N-glycoproteins               | N-glycopeptides       | SVM            |        |        | DNN            |        |        | Manual Classification |
|-----|--------------------|--------------|-------------------------------|-----------------------|----------------|--------|--------|----------------|--------|--------|-----------------------|
|     |                    |              |                               |                       | Classification | Pscore | FDR    | Classification | Pscore | FDR    |                       |
| 91  | Human Plasma exp_2 | 7938         | Alpha-1-acid glycoprotein 1,2 | NEEYNK_6_5_2_3        | Dual           | 2.1661 | 0.0000 | Dual           | 6.4334 | 0.0033 | Dual                  |
| 92  | Human Plasma exp_4 | 7944         | Alpha-1-acid glycoprotein 1,2 | NEEYNK_6_5_2_3        | Dual           | 4.4708 | 0.0000 | Dual           | 6.2846 | 0.0032 | Dual                  |
| 93  | Human Plasma exp_2 | 3426         | Alpha-1-acid glycoprotein 2   | ENGTVSR_5_4_0_2       | None           | 1.8731 | 0.0000 | None           | 7.2709 | 0.0000 | None                  |
| 94  | Human Plasma exp_3 | 3353         | Alpha-1-acid glycoprotein 2   | ENGTVSR_5_4_0_2       | None           | 2.4586 | 0.0000 | None           | 7.2860 | 0.0000 | None                  |
| 95  | Human Plasma exp_4 | 3468         | Alpha-1-acid glycoprotein 2   | ENGTVSR_5_4_0_2       | None           | 1.8381 | 0.0000 | None           | 7.2730 | 0.0000 | None                  |
| 96  | Human Plasma exp_1 | 3108         | Alpha-1-acid glycoprotein 2   | ENGTVSR_6_5_0_2       | None           | 1.4949 | 0.0000 | None           | 7.2846 | 0.0000 | None                  |
| 97  | Human Plasma exp_4 | 3240         | Alpha-1-acid glycoprotein 2   | ENGTVSR_6_5_0_2       | None           | 1.4893 | 0.0000 | None           | 7.2857 | 0.0000 | None                  |
| 98  | Human Plasma exp_1 | 6030         | Alpha-1-acid glycoprotein 2   | ENGTVSR_6_5_0_3       | None           | 1.7183 | 0.0000 | None           | 7.2491 | 0.0000 | None                  |
| 99  | Human Plasma exp_4 | 6123         | Alpha-1-acid glycoprotein 2   | ENGTVSR_6_5_0_3       | None           | 1.5883 | 0.0000 | None           | 7.2492 | 0.0000 | None                  |
| 100 | Human Plasma exp_1 | 6005         | Alpha-1-acid glycoprotein 2   | ENGTVSR_6_5_1_3       | Outer          | 4.0699 | 0.0000 | Outer          | 6.6372 | 0.0000 | Outer                 |
| 101 | Human Plasma exp_2 | 6119         | Alpha-1-acid glycoprotein 2   | ENGTVSR_6_5_1_3       | Outer          | 4.2219 | 0.0000 | Outer          | 6.2132 | 0.0032 | Outer                 |
| 102 | Human Plasma exp_3 | 6041         | Alpha-1-acid glycoprotein 2   | ENGTVSR_6_5_1_3       | Outer          | 2.3959 | 0.0000 | Outer          | 6.6709 | 0.0000 | Outer                 |
| 103 | Human Plasma exp_5 | 6036         | Alpha-1-acid glycoprotein 2   | ENGTVSR_6_5_1_3       | Outer          | 3.1376 | 0.0000 | Outer          | 6.6910 | 0.0000 | Outer                 |
| 104 | Human Plasma exp_5 | 6055         | Alpha-1-acid glycoprotein 2   | ENGTVSR_6_5_1_3       | Outer          | 3.4194 | 0.0000 | Outer          | 6.0137 | 0.0032 | Outer                 |
| 105 | Human Plasma exp_5 | 5964         | Alpha-1-acid glycoprotein 2   | ENGTVSR_6_5_2_3       | Dual           | 2.0031 | 0.0000 | Dual           | 5.6464 | 0.0031 | Outer                 |
| 106 | Human Plasma exp_1 | 10095        | Alpha-1-acid glycoprotein 2   | ENGTVSR_7_6_1_4       | Outer          | 2.2149 | 0.0000 | Outer          | 6.5984 | 0.0018 | Outer                 |
| 107 | Human Plasma exp_5 | 10345        | Alpha-1-acid glycoprotein 2   | ENGTVSR_7_6_1_4       | Outer          | 2.0400 | 0.0000 | Outer          | 6.6172 | 0.0000 | Outer                 |
| 108 | Human Plasma exp_2 | 10867        | Alpha-1-acid glycoprotein 2   | ENGTVSR_7_6_2_4       | Dual           | 0.0397 | 0.3927 | Outer          | 5.4306 | 0.0031 | Outer                 |
| 109 | Human Plasma exp_3 | 10390        | Alpha-1-acid glycoprotein 2   | ENGTVSR_7_6_2_4       | Outer          | 1.0236 | 0.0000 | Outer          | 6.5064 | 0.0017 | Outer                 |
| 110 | Human Plasma exp_5 | 10745        | Alpha-1-acid glycoprotein 2   | ENGTVSR_7_6_2_4       | Dual           | 0.1233 | 0.2704 | Outer          | 4.9290 | 0.0031 | Outer                 |
| 111 | Human Plasma exp_2 | 10369        | Alpha-1-acid glycoprotein 2   | ENGTVSR_7_6_3_4       | Outer          | 0.4145 | 0.0505 | Outer          | 0.6781 | 0.1379 | Outer                 |
| 112 | Human Plasma exp_3 | 10349        | Alpha-1-acid glycoprotein 2   | ENGTVSR_7_6_3_4       | Dual           | 0.2023 | 0.1637 | Outer          | 3.5855 | 0.0091 | Outer                 |
| 113 | Human Plasma exp_4 | 10452        | Alpha-1-acid glycoprotein 2   | ENGTVSR_7_6_3_4       | Dual           | 0.0229 | 0.4259 | Outer          | 4.2648 | 0.0061 | Outer                 |
| 114 | Human Plasma exp_1 | 10219        | Alpha-1-acid glycoprotein 2   | ENGTVSR_8_7_0_4       | None           | 1.8071 | 0.0000 | None           | 7.2047 | 0.0000 | None                  |
| 115 | Human Plasma exp_2 | 28637        | Alpha-1-acid glycoprotein 2   | LVPVPITNATLDR_5_4_0_2 | None           | 3.3886 | 0.0000 | None           | 7.3154 | 0.0000 | None                  |
| 116 | Human Plasma exp_3 | 28111        | Alpha-1-acid glycoprotein 2   | LVPVPITNATLDR_5_4_0_2 | None           | 3.8520 | 0.0000 | None           | 7.3295 | 0.0000 | None                  |
| 117 | Human Plasma exp_4 | 28654        | Alpha-1-acid glycoprotein 2   | LVPVPITNATLDR_5_4_0_2 | None           | 3.8197 | 0.0000 | None           | 7.3231 | 0.0000 | None                  |
| 118 | Human Plasma exp_5 | 27615        | Alpha-1-acid glycoprotein 2   | LVPVPITNATLDR_5_4_0_2 | None           | 2.5115 | 0.0000 | None           | 7.3119 | 0.0000 | None                  |
| 119 | Human Plasma exp_1 | 27586        | Alpha-1-acid glycoprotein 2   | LVPVPITNATLDR_6_5_0_2 | None           | 3.3957 | 0.0000 | None           | 7.2902 | 0.0000 | None                  |
| 120 | Human Plasma exp_3 | 27708        | Alpha-1-acid glycoprotein 2   | LVPVPITNATLDR_6_5_0_2 | None           | 2.1748 | 0.0000 | None           | 7.2918 | 0.0000 | None                  |

**Supplementary Table 8. Continued.**

| No. | Experiment         | CID Scan No. | N-glycoproteins             | N-glycopeptides          | SVM            |        |        | DNN            |        |        | Manual Classification |
|-----|--------------------|--------------|-----------------------------|--------------------------|----------------|--------|--------|----------------|--------|--------|-----------------------|
|     |                    |              |                             |                          | Classification | Pscore | FDR    | Classification | Pscore | FDR    |                       |
| 121 | Human Plasma exp_5 | 27392        | Alpha-1-acid glycoprotein 2 | LVPVPITNATLDR_6_5_0_2    | None           | 2.5468 | 0.0000 | None           | 7.3023 | 0.0000 | None                  |
| 122 | Human Plasma exp_4 | 30813        | Alpha-1-acid glycoprotein 2 | LVPVPITNATLDR_6_5_0_3    | None           | 1.5010 | 0.0000 | None           | 7.2462 | 0.0000 | None                  |
| 123 | Human Plasma exp_4 | 30545        | Alpha-1-acid glycoprotein 2 | LVPVPITNATLDR_6_5_0_3    | None           | 2.1682 | 0.0000 | None           | 7.2592 | 0.0000 | None                  |
| 124 | Human Plasma exp_2 | 30889        | Alpha-1-acid glycoprotein 2 | LVPVPITNATLDR_6_5_1_3    | Outer          | 1.4401 | 0.0000 | Outer          | 6.5431 | 0.0017 | Outer                 |
| 125 | Human Plasma exp_4 | 30616        | Alpha-1-acid glycoprotein 2 | LVPVPITNATLDR_6_5_1_3    | Outer          | 2.7019 | 0.0000 | Outer          | 6.6066 | 0.0019 | Outer                 |
| 126 | Human Plasma exp_4 | 30328        | Alpha-1-acid glycoprotein 2 | LVPVPITNATLDR_7_6_0_3    | None           | 1.7674 | 0.0000 | None           | 7.1983 | 0.0000 | None                  |
| 127 | Human Plasma exp_4 | 29256        | Alpha-1-acid glycoprotein 2 | QNQCFYNSSYLNVQR_6_5_0_3  | None           | 1.8630 | 0.0000 | None           | 7.2671 | 0.0000 | None                  |
| 128 | Human Plasma exp_5 | 28394        | Alpha-1-acid glycoprotein 2 | QNQCFYNSSYLNVQR_6_5_0_3  | None           | 2.0980 | 0.0000 | None           | 7.2619 | 0.0000 | None                  |
| 129 | Human Plasma exp_1 | 2023         | Alpha-1-antichymotrypsin    | NGTR_6_5_0_3             | None           | 2.1701 | 0.0000 | None           | 7.2800 | 0.0000 | None                  |
| 130 | Human Plasma exp_2 | 2300         | Alpha-1-antichymotrypsin    | NGTR_6_5_0_3             | None           | 1.7819 | 0.0000 | None           | 7.2571 | 0.0000 | None                  |
| 131 | Human Plasma exp_3 | 2083         | Alpha-1-antichymotrypsin    | NGTR_6_5_0_3             | None           | 3.1810 | 0.0000 | None           | 7.2910 | 0.0000 | None                  |
| 132 | Human Plasma exp_4 | 2176         | Alpha-1-antichymotrypsin    | NGTR_6_5_0_3             | None           | 3.5288 | 0.0000 | None           | 7.2991 | 0.0000 | None                  |
| 133 | Human Plasma exp_5 | 2213         | Alpha-1-antichymotrypsin    | NGTR_6_5_0_3             | None           | 1.9565 | 0.0000 | None           | 7.2732 | 0.0000 | None                  |
| 134 | Human Plasma exp_1 | 2172         | Alpha-1-antichymotrypsin    | NGTR_6_5_1_3             | Core           | 0.3715 | 0.0544 | Core           | 5.2192 | 0.0031 | Core                  |
| 135 | Human Plasma exp_2 | 2280         | Alpha-1-antichymotrypsin    | NGTR_6_5_1_3             | Core           | 1.6833 | 0.0000 | Core           | 6.5975 | 0.0018 | Core                  |
| 136 | Human Plasma exp_4 | 2297         | Alpha-1-antichymotrypsin    | NGTR_6_5_1_3             | Core           | 0.8467 | 0.0000 | Core           | 6.6110 | 0.0019 | Core                  |
| 137 | Human Plasma exp_1 | 32504        | Alpha-1-antitrypsin         | YLGNATAIFFLPDEGK_5_4_0_2 | None           | 3.4142 | 0.0000 | None           | 7.3311 | 0.0000 | None                  |
| 138 | Human Plasma exp_2 | 33340        | Alpha-1-antitrypsin         | YLGNATAIFFLPDEGK_5_4_0_2 | None           | 3.8759 | 0.0000 | None           | 7.3234 | 0.0000 | None                  |
| 139 | Human Plasma exp_3 | 32826        | Alpha-1-antitrypsin         | YLGNATAIFFLPDEGK_5_4_0_2 | None           | 2.7554 | 0.0000 | None           | 7.3117 | 0.0000 | None                  |
| 140 | Human Plasma exp_4 | 33074        | Alpha-1-antitrypsin         | YLGNATAIFFLPDEGK_5_4_0_2 | None           | 3.2063 | 0.0000 | None           | 7.3284 | 0.0000 | None                  |
| 141 | Human Plasma exp_5 | 32099        | Alpha-1-antitrypsin         | YLGNATAIFFLPDEGK_5_4_0_2 | None           | 3.0559 | 0.0000 | None           | 7.3269 | 0.0000 | None                  |
| 142 | Human Plasma exp_1 | 28824        | Alpha-2-HS-glycoprotein     | VCQDCPLLAPLNDR_5_4_0_2   | None           | 3.6994 | 0.0000 | None           | 7.3186 | 0.0000 | None                  |
| 143 | Human Plasma exp_4 | 29566        | Alpha-2-HS-glycoprotein     | VCQDCPLLAPLNDR_5_4_0_2   | None           | 3.5413 | 0.0000 | None           | 7.3124 | 0.0000 | None                  |
| 144 | Human Plasma exp_5 | 28442        | Alpha-2-HS-glycoprotein     | VCQDCPLLAPLNDR_5_4_0_2   | None           | 4.7553 | 0.0000 | None           | 7.3411 | 0.0000 | None                  |
| 145 | Human Plasma exp_5 | 28352        | Alpha-2-HS-glycoprotein     | VCQDCPLLAPLNDR_5_4_1_2   | Core           | 1.7844 | 0.0000 | Core           | 5.8803 | 0.0031 | Core                  |
| 146 | Human Plasma exp_4 | 31529        | Alpha-2-HS-glycoprotein     | VCQDCPLLAPLNDR_6_5_1_3   | Outer          | 1.4924 | 0.0000 | Outer          | 6.3196 | 0.0032 | Outer                 |
| 147 | Human Plasma exp_5 | 30597        | Alpha-2-HS-glycoprotein     | VCQDCPLLAPLNDR_6_5_1_3   | Outer          | 3.5771 | 0.0000 | Outer          | 6.6235 | 0.0000 | Outer                 |
| 148 | Human Plasma exp_5 | 28906        | Aminopeptidase N            | VPVTLALNNTFLIEER_4_4_0_1 | None           | 4.8943 | 0.0000 | None           | 7.3673 | 0.0000 | None                  |
| 149 | Human Plasma exp_1 | 1530         | Angiotensinogen             | NCTSR_5_4_0_2            | None           | 2.8845 | 0.0000 | None           | 7.2868 | 0.0000 | None                  |
| 150 | Human Plasma exp_2 | 1557         | Angiotensinogen             | NCTSR_5_4_0_2            | None           | 3.3498 | 0.0000 | None           | 7.2893 | 0.0000 | None                  |

**Supplementary Table 8. Continued.**

| No. | Experiment         | CID Scan No. | N-glycoproteins       | N-glycopeptides                | SVM            |        |        | DNN            |        |        | Manual Classification |
|-----|--------------------|--------------|-----------------------|--------------------------------|----------------|--------|--------|----------------|--------|--------|-----------------------|
|     |                    |              |                       |                                | Classification | Pscore | FDR    | Classification | Pscore | FDR    |                       |
| 151 | Human Plasma exp_3 | 1544         | Angiotensinogen       | NCTSR_5_4_0_2                  | None           | 3.3851 | 0.0000 | None           | 7.2904 | 0.0000 | None                  |
| 152 | Human Plasma exp_4 | 1592         | Angiotensinogen       | NCTSR_5_4_0_2                  | None           | 3.5201 | 0.0000 | None           | 7.2919 | 0.0000 | None                  |
| 153 | Human Plasma exp_5 | 1511         | Angiotensinogen       | NCTSR_5_4_0_2                  | None           | 3.0779 | 0.0000 | None           | 7.2852 | 0.0000 | None                  |
| 154 | Human Plasma exp_1 | 3219         | Angiotensinogen       | NCTSR_6_5_0_3                  | None           | 2.0576 | 0.0000 | None           | 7.2765 | 0.0000 | None                  |
| 155 | Human Plasma exp_2 | 3309         | Angiotensinogen       | NCTSR_6_5_0_3                  | None           | 1.5216 | 0.0000 | None           | 7.2497 | 0.0000 | None                  |
| 156 | Human Plasma exp_5 | 3239         | Angiotensinogen       | NCTSR_6_5_0_3                  | None           | 2.0113 | 0.0000 | None           | 7.2742 | 0.0000 | None                  |
| 157 | Human Plasma exp_1 | 25028        | Apolipoprotein C-IV   | ELLETVVNR_5_4_0_2              | None           | 1.8419 | 0.0000 | None           | 7.2561 | 0.0000 | None                  |
| 158 | Human Plasma exp_5 | 24778        | Apolipoprotein C-IV   | ELLETVVNR_5_4_0_2              | None           | 1.8519 | 0.0000 | None           | 7.2626 | 0.0000 | None                  |
| 159 | Human Plasma exp_5 | 24718        | Apolipoprotein D      | ADGTVNQIEGEATPVNLTEPAK_5_4_0_1 | None           | 3.0953 | 0.0000 | None           | 7.2788 | 0.0000 | None                  |
| 160 | Human Plasma exp_2 | 25293        | Apolipoprotein D      | ADGTVNQIEGEATPVNLTEPAK_5_4_1_1 | Core           | 7.5475 | 0.0000 | Core           | 6.6285 | 0.0000 | Core                  |
| 161 | Human Plasma exp_3 | 24804        | Apolipoprotein D      | ADGTVNQIEGEATPVNLTEPAK_5_4_1_1 | Core           | 5.5294 | 0.0000 | Core           | 6.6056 | 0.0019 | Core                  |
| 162 | Human Plasma exp_4 | 25277        | Apolipoprotein D      | ADGTVNQIEGEATPVNLTEPAK_5_4_1_1 | Core           | 8.0918 | 0.0000 | Core           | 6.6219 | 0.0000 | Core                  |
| 163 | Human Plasma exp_2 | 27855        | Apolipoprotein D      | ADGTVNQIEGEATPVNLTEPAK_5_4_1_2 | Core           | 3.2671 | 0.0000 | Core           | 6.4372 | 0.0033 | Core                  |
| 164 | Human Plasma exp_3 | 24430        | Beta-2-glycoprotein 1 | LGNWSAMPSCCK_5_4_0_2           | None           | 2.8114 | 0.0000 | None           | 7.3218 | 0.0000 | None                  |
| 165 | Human Plasma exp_4 | 24919        | Beta-2-glycoprotein 1 | LGNWSAMPSCCK_5_4_0_2           | None           | 4.3671 | 0.0000 | None           | 7.3283 | 0.0000 | None                  |
| 166 | Human Plasma exp_2 | 15673        | Beta-2-glycoprotein 1 | VYKPSAGNNSLYR_4_3_0_1          | None           | 3.8002 | 0.0000 | None           | 7.3542 | 0.0000 | None                  |
| 167 | Human Plasma exp_4 | 18459        | Beta-2-glycoprotein 1 | VYKPSAGNNSLYR_6_5_1_3          | Outer          | 3.3453 | 0.0000 | Outer          | 6.6889 | 0.0000 | Outer                 |
| 168 | Human Plasma exp_5 | 22408        | Biotinidase           | FNDTEVLQR_5_4_0_2              | None           | 3.4949 | 0.0000 | None           | 7.2809 | 0.0000 | None                  |
| 169 | Human Plasma exp_1 | 24313        | Biotinidase           | NPVGLIGAENATGETDPSHSK_6_5_0_3  | None           | 2.3039 | 0.0000 | None           | 7.2770 | 0.0000 | None                  |
| 170 | Human Plasma exp_3 | 30160        | Ceruloplasmin         | AGLQAFFQVQECNK_5_4_0_2         | None           | 3.2117 | 0.0000 | None           | 7.2717 | 0.0000 | None                  |
| 171 | Human Plasma exp_4 | 30413        | Ceruloplasmin         | AGLQAFFQVQECNK_5_4_0_2         | None           | 2.8177 | 0.0000 | None           | 7.3220 | 0.0000 | None                  |
| 172 | Human Plasma exp_3 | 20507        | Ceruloplasmin         | EHEGAIYPDNTTDFQR_4_3_0_1       | None           | 3.7743 | 0.0000 | None           | 7.3481 | 0.0000 | None                  |
| 173 | Human Plasma exp_3 | 20296        | Ceruloplasmin         | EHEGAIYPDNTTDFQR_4_3_1_1       | Core           | 8.7971 | 0.0000 | Core           | 2.7220 | 0.0163 | Core                  |
| 174 | Human Plasma exp_2 | 21574        | Ceruloplasmin         | ELHHLQEQNVSN AFLDK_5_4_0_2     | None           | 4.0604 | 0.0000 | None           | 7.3424 | 0.0000 | None                  |
| 175 | Human Plasma exp_2 | 21244        | Ceruloplasmin         | ELHHLQEQNVSN AFLDK_5_4_1_2     | Core           | 8.7677 | 0.0000 | Core           | 6.2263 | 0.0032 | Core                  |
| 176 | Human Plasma exp_1 | 29132        | Ceruloplasmin         | ENLTAPGSDSAVF FEQG TTR_5_4_0_2 | None           | 4.4363 | 0.0000 | None           | 7.3476 | 0.0000 | None                  |
| 177 | Human Plasma exp_2 | 29871        | Ceruloplasmin         | ENLTAPGSDSAVF FEQG TTR_5_4_0_2 | None           | 2.9752 | 0.0000 | None           | 7.3049 | 0.0000 | None                  |
| 178 | Human Plasma exp_3 | 29403        | Ceruloplasmin         | ENLTAPGSDSAVF FEQG TTR_5_4_0_2 | None           | 4.2624 | 0.0000 | None           | 7.3152 | 0.0000 | None                  |
| 179 | Human Plasma exp_4 | 29625        | Ceruloplasmin         | ENLTAPGSDSAVF FEQG TTR_5_4_0_2 | None           | 4.7734 | 0.0000 | None           | 7.3550 | 0.0000 | None                  |
| 180 | Human Plasma exp_5 | 28716        | Ceruloplasmin         | ENLTAPGSDSAVF FEQG TTR_5_4_0_2 | None           | 3.6370 | 0.0000 | None           | 7.3408 | 0.0000 | None                  |

Supplementary Table 8. Continued.

| No. | Experiment         | CID Scan No. | N-glycoproteins        | N-glycopeptides        | SVM            |        |        | DNN            |        |        | Manual Classification |
|-----|--------------------|--------------|------------------------|------------------------|----------------|--------|--------|----------------|--------|--------|-----------------------|
|     |                    |              |                        |                        | Classification | Pscore | FDR    | Classification | Pscore | FDR    |                       |
| 181 | Human Plasma exp_1 | 11457        | Cholinesterase         | DNNSIITR_5_4_0_1       | None           | 3.2609 | 0.0000 | None           | 7.3146 | 0.0000 | None                  |
| 182 | Human Plasma exp_2 | 11650        | Cholinesterase         | DNNSIITR_5_4_0_1       | None           | 3.1470 | 0.0000 | None           | 7.3214 | 0.0000 | None                  |
| 183 | Human Plasma exp_5 | 11547        | Cholinesterase         | DNNSIITR_5_4_0_1       | None           | 2.6129 | 0.0000 | None           | 7.2863 | 0.0000 | None                  |
| 184 | Human Plasma exp_5 | 15800        | Cholinesterase         | DNNSIITR_5_4_0_2       | None           | 3.1510 | 0.0000 | None           | 7.2977 | 0.0000 | None                  |
| 185 | Human Plasma exp_1 | 4485         | Cholinesterase         | DNYTK_5_4_0_2          | None           | 3.0058 | 0.0000 | None           | 7.2998 | 0.0000 | None                  |
| 186 | Human Plasma exp_2 | 4550         | Cholinesterase         | DNYTK_5_4_0_2          | None           | 2.9621 | 0.0000 | None           | 7.2817 | 0.0000 | None                  |
| 187 | Human Plasma exp_3 | 4501         | Cholinesterase         | DNYTK_5_4_0_2          | None           | 2.9822 | 0.0000 | None           | 7.2804 | 0.0000 | None                  |
| 188 | Human Plasma exp_4 | 4632         | Cholinesterase         | DNYTK_5_4_0_2          | None           | 3.3595 | 0.0000 | None           | 7.2994 | 0.0000 | None                  |
| 189 | Human Plasma exp_5 | 4514         | Cholinesterase         | DNYTK_5_4_0_2          | None           | 2.7796 | 0.0000 | None           | 7.2757 | 0.0000 | None                  |
| 190 | Human Plasma exp_2 | 17003        | Cholinesterase         | ENETEIIK_5_4_0_2       | None           | 1.9921 | 0.0000 | None           | 7.2773 | 0.0000 | None                  |
| 191 | Human Plasma exp_5 | 16747        | Cholinesterase         | ENETEIIK_5_4_0_2       | None           | 1.7928 | 0.0000 | None           | 7.2619 | 0.0000 | None                  |
| 192 | Human Plasma exp_1 | 12515        | Clusterin              | EDALNETR_5_4_0_2       | None           | 2.7477 | 0.0000 | None           | 7.2419 | 0.0000 | None                  |
| 193 | Human Plasma exp_1 | 16327        | Clusterin              | EDALNETR_6_5_0_3       | None           | 1.7832 | 0.0000 | None           | 7.2571 | 0.0000 | None                  |
| 194 | Human Plasma exp_3 | 16379        | Clusterin              | EDALNETR_6_5_1_3       | Outer          | 1.6930 | 0.0000 | Outer          | 6.5883 | 0.0017 | Outer                 |
| 195 | Human Plasma exp_4 | 16705        | Clusterin              | EDALNETR_6_5_1_3       | Outer          | 3.3589 | 0.0000 | Outer          | 6.2351 | 0.0032 | Outer                 |
| 196 | Human Plasma exp_5 | 16430        | Clusterin              | EDALNETR_6_5_1_3       | Outer          | 3.1122 | 0.0000 | Outer          | 6.0156 | 0.0032 | Outer                 |
| 197 | Human Plasma exp_5 | 5173         | Clusterin              | HNSTGCLR_6_5_0_3       | None           | 1.4568 | 0.0000 | None           | 7.2249 | 0.0000 | None                  |
| 198 | Human Plasma exp_5 | 5336         | Clusterin              | HNSTGCLR_6_5_0_3       | None           | 1.6106 | 0.0000 | None           | 7.2516 | 0.0000 | None                  |
| 199 | Human Plasma exp_1 | 27042        | Clusterin              | LANLTQGEDQYYLR_5_4_0_2 | None           | 2.9981 | 0.0000 | None           | 7.3454 | 0.0000 | None                  |
| 200 | Human Plasma exp_2 | 27735        | Clusterin              | LANLTQGEDQYYLR_5_4_0_2 | None           | 2.3422 | 0.0000 | None           | 7.3571 | 0.0000 | None                  |
| 201 | Human Plasma exp_3 | 27148        | Clusterin              | LANLTQGEDQYYLR_5_4_0_2 | None           | 0.3022 | 0.0781 | None           | 7.2948 | 0.0000 | None                  |
| 202 | Human Plasma exp_4 | 27518        | Clusterin              | LANLTQGEDQYYLR_5_4_0_2 | None           | 4.1626 | 0.0000 | None           | 7.3395 | 0.0000 | None                  |
| 203 | Human Plasma exp_5 | 26765        | Clusterin              | LANLTQGEDQYYLR_5_4_0_2 | None           | 2.9670 | 0.0000 | None           | 7.3495 | 0.0000 | None                  |
| 204 | Human Plasma exp_2 | 29998        | Clusterin              | LANLTQGEDQYYLR_6_5_1_3 | Outer          | 0.7453 | 0.0016 | Outer          | 6.3233 | 0.0032 | Outer                 |
| 205 | Human Plasma exp_3 | 29473        | Clusterin              | LANLTQGEDQYYLR_6_5_1_3 | Outer          | 0.4081 | 0.0504 | Outer          | 4.3986 | 0.0061 | Outer                 |
| 206 | Human Plasma exp_4 | 29768        | Clusterin              | LANLTQGEDQYYLR_6_5_1_3 | Outer          | 0.4068 | 0.0504 | Outer          | 5.9993 | 0.0032 | Outer                 |
| 207 | Human Plasma exp_1 | 14322        | Coagulation factor XII | NHSCEPCQLAVR_5_4_0_2   | None           | 4.1165 | 0.0000 | None           | 7.3454 | 0.0000 | None                  |
| 208 | Human Plasma exp_1 | 14340        | Coagulation factor XII | NHSCEPCQLAVR_5_4_0_2   | None           | 1.7752 | 0.0000 | None           | 7.2780 | 0.0000 | None                  |
| 209 | Human Plasma exp_2 | 14554        | Coagulation factor XII | NHSCEPCQLAVR_5_4_0_2   | None           | 3.7035 | 0.0000 | None           | 7.3380 | 0.0000 | None                  |
| 210 | Human Plasma exp_2 | 14620        | Coagulation factor XII | NHSCEPCQLAVR_5_4_0_2   | None           | 2.7719 | 0.0000 | None           | 7.3079 | 0.0000 | None                  |

**Supplementary Table 8. Continued.**

| No. | Experiment         | CID Scan No. | N-glycoproteins                       | N-glycopeptides             | SVM            |        |        | DNN            |        |        | Manual Classification |
|-----|--------------------|--------------|---------------------------------------|-----------------------------|----------------|--------|--------|----------------|--------|--------|-----------------------|
|     |                    |              |                                       |                             | Classification | Pscore | FDR    | Classification | Pscore | FDR    |                       |
| 211 | Human Plasma exp_3 | 14357        | Coagulation factor XII                | NHSCEPCQLAVR_5_4_0_2        | None           | 4.1423 | 0.0000 | None           | 7.3422 | 0.0000 | None                  |
| 212 | Human Plasma exp_3 | 14322        | Coagulation factor XII                | NHSCEPCQLAVR_5_4_0_2        | None           | 2.8655 | 0.0000 | None           | 7.3255 | 0.0000 | None                  |
| 213 | Human Plasma exp_4 | 14648        | Coagulation factor XII                | NHSCEPCQLAVR_5_4_0_2        | None           | 4.2596 | 0.0000 | None           | 7.3497 | 0.0000 | None                  |
| 214 | Human Plasma exp_4 | 14646        | Coagulation factor XII                | NHSCEPCQLAVR_5_4_0_2        | None           | 2.8339 | 0.0000 | None           | 7.3062 | 0.0000 | None                  |
| 215 | Human Plasma exp_5 | 14392        | Coagulation factor XII                | NHSCEPCQLAVR_5_4_0_2        | None           | 4.1920 | 0.0000 | None           | 7.3476 | 0.0000 | None                  |
| 216 | Human Plasma exp_2 | 3044         | Coagulation factor XII                | NVTAEQAR_5_4_0_1            | None           | 1.0246 | 0.0000 | None           | 6.9818 | 0.0000 | None                  |
| 217 | Human Plasma exp_3 | 2946         | Coagulation factor XII                | NVTAEQAR_5_4_0_1            | None           | 2.3616 | 0.0000 | None           | 7.2610 | 0.0000 | None                  |
| 218 | Human Plasma exp_1 | 5719         | Coagulation factor XII                | NVTAEQAR_5_4_0_2            | None           | 2.9777 | 0.0000 | None           | 7.2797 | 0.0000 | None                  |
| 219 | Human Plasma exp_2 | 5855         | Coagulation factor XII                | NVTAEQAR_5_4_0_2            | None           | 3.8079 | 0.0000 | None           | 7.2976 | 0.0000 | None                  |
| 220 | Human Plasma exp_3 | 5778         | Coagulation factor XII                | NVTAEQAR_5_4_0_2            | None           | 2.6945 | 0.0000 | None           | 7.2779 | 0.0000 | None                  |
| 221 | Human Plasma exp_5 | 5807         | Coagulation factor XII                | NVTAEQAR_5_4_0_2            | None           | 3.4142 | 0.0000 | None           | 7.2902 | 0.0000 | None                  |
| 222 | Human Plasma exp_5 | 10110        | Coagulation factor XII                | NVTAEQAR_6_5_0_3            | None           | 3.0024 | 0.0000 | None           | 7.2864 | 0.0000 | None                  |
| 223 | Human Plasma exp_1 | 16554        | Complement component C7               | NYTLTGR_5_4_1_2             | Core           | 3.4255 | 0.0000 | Core           | 6.6167 | 0.0000 | Core                  |
| 224 | Human Plasma exp_2 | 16861        | Complement component C7               | NYTLTGR_5_4_1_2             | None           | 1.1283 | 0.0000 | Core           | 4.3467 | 0.0061 | Core                  |
| 225 | Human Plasma exp_3 | 16589        | Complement component C7               | NYTLTGR_5_4_1_2             | Core           | 3.7914 | 0.0000 | Core           | 6.6281 | 0.0000 | Core                  |
| 226 | Human Plasma exp_4 | 16975        | Complement component C7               | NYTLTGR_5_4_1_2             | Core           | 2.9364 | 0.0000 | Core           | 6.6340 | 0.0000 | Core                  |
| 227 | Human Plasma exp_5 | 16666        | Complement component C7               | NYTLTGR_5_4_1_2             | Core           | 2.9851 | 0.0000 | Core           | 6.6275 | 0.0000 | Core                  |
| 228 | Human Plasma exp_1 | 19516        | Complement component C8 alpha chain   | GGSSGWSGGLAQNR_5_4_0_2      | None           | 2.7582 | 0.0000 | None           | 7.3216 | 0.0000 | None                  |
| 229 | Human Plasma exp_3 | 19270        | Complement component C8 alpha chain   | GGSSGWSGGLAQNR_5_4_0_2      | None           | 4.1223 | 0.0000 | None           | 7.3397 | 0.0000 | None                  |
| 230 | Human Plasma exp_5 | 19483        | Complement component C8 alpha chain   | GGSSGWSGGLAQNR_5_4_0_2      | None           | 3.2089 | 0.0000 | None           | 7.3071 | 0.0000 | None                  |
| 231 | Human Plasma exp_1 | 2149         | Complement component C8 beta chain    | NVTEK_4_3_0_1               | None           | 5.0553 | 0.0000 | None           | 7.3556 | 0.0000 | None                  |
| 232 | Human Plasma exp_4 | 2309         | Complement component C8 beta chain    | NVTEK_4_3_0_1               | None           | 5.0829 | 0.0000 | None           | 7.3541 | 0.0000 | None                  |
| 233 | Human Plasma exp_5 | 2192         | Complement component C8 beta chain    | NVTEK_4_3_0_1               | None           | 4.3068 | 0.0000 | None           | 7.3506 | 0.0000 | None                  |
| 234 | Human Plasma exp_1 | 2116         | Complement component C8 beta chain    | NVTEK_5_4_0_2               | None           | 3.6839 | 0.0000 | None           | 7.3055 | 0.0000 | None                  |
| 235 | Human Plasma exp_1 | 2128         | Complement component C8 beta chain    | NVTEK_5_4_0_2               | None           | 2.1066 | 0.0000 | None           | 7.2684 | 0.0000 | None                  |
| 236 | Human Plasma exp_2 | 2272         | Complement component C8 beta chain    | NVTEK_5_4_0_2               | None           | 3.4882 | 0.0000 | None           | 7.2908 | 0.0000 | None                  |
| 237 | Human Plasma exp_3 | 2162         | Complement component C8 beta chain    | NVTEK_5_4_0_2               | None           | 3.5181 | 0.0000 | None           | 7.3007 | 0.0000 | None                  |
| 238 | Human Plasma exp_4 | 2273         | Complement component C8 beta chain    | NVTEK_5_4_0_2               | None           | 3.2711 | 0.0000 | None           | 7.2797 | 0.0000 | None                  |
| 239 | Human Plasma exp_5 | 2287         | Complement component C8 beta chain    | NVTEK_5_4_0_2               | None           | 3.0059 | 0.0000 | None           | 7.2811 | 0.0000 | None                  |
| 240 | Human Plasma exp_1 | 21593        | Complement factor H-related protein 3 | FVQGNSTEVACHPGYGLPK_5_4_0_2 | None           | 1.8257 | 0.0000 | None           | 7.2742 | 0.0000 | None                  |

Supplementary Table 8. Continued.

| No. | Experiment         | CID Scan No. | N-glycoproteins                        | N-glycopeptides                  | SVM            |        |        | DNN            |        |        | Manual Classification |
|-----|--------------------|--------------|----------------------------------------|----------------------------------|----------------|--------|--------|----------------|--------|--------|-----------------------|
|     |                    |              |                                        |                                  | Classification | Pscore | FDR    | Classification | Pscore | FDR    |                       |
| 241 | Human Plasma exp_4 | 21901        | Complement factor H-related protein 3  | FVQGNSTEVACHPGYGLPK_5_4_0_2      | None           | 3.7161 | 0.0000 | None           | 7.3144 | 0.0000 | None                  |
| 242 | Human Plasma exp_3 | 15012        | Complement factor I                    | FLNNGTCTAEGK_5_4_0_2             | None           | 3.6104 | 0.0000 | None           | 7.3159 | 0.0000 | None                  |
| 243 | Human Plasma exp_5 | 15048        | Complement factor I                    | FLNNGTCTAEGK_5_4_0_2             | None           | 3.5364 | 0.0000 | None           | 7.3163 | 0.0000 | None                  |
| 244 | Human Plasma exp_4 | 3395         | Complement factor I                    | NGTAVCATNR_5_4_0_1               | None           | 3.2423 | 0.0000 | None           | 7.3147 | 0.0000 | None                  |
| 245 | Human Plasma exp_1 | 6679         | Complement factor I                    | NGTAVCATNR_5_4_0_2               | None           | 3.4563 | 0.0000 | None           | 7.3072 | 0.0000 | None                  |
| 246 | Human Plasma exp_2 | 6669         | Complement factor I                    | NGTAVCATNR_5_4_0_2               | None           | 2.1825 | 0.0000 | None           | 7.2836 | 0.0000 | None                  |
| 247 | Human Plasma exp_3 | 6787         | Complement factor I                    | NGTAVCATNR_5_4_0_2               | None           | 3.7318 | 0.0000 | None           | 7.2941 | 0.0000 | None                  |
| 248 | Human Plasma exp_4 | 6836         | Complement factor I                    | NGTAVCATNR_5_4_0_2               | None           | 3.6998 | 0.0000 | None           | 7.3039 | 0.0000 | None                  |
| 249 | Human Plasma exp_5 | 6774         | Complement factor I                    | NGTAVCATNR_5_4_0_2               | None           | 3.7777 | 0.0000 | None           | 7.3150 | 0.0000 | None                  |
| 250 | Human Plasma exp_4 | 17592        | Desmocollin-2                          | ANYTILK_5_4_0_1                  | None           | 3.1139 | 0.0000 | None           | 7.2956 | 0.0000 | None                  |
| 251 | Human Plasma exp_2 | 22615        | Desmocollin-2                          | ANYTILK_5_4_0_2                  | None           | 2.9822 | 0.0000 | None           | 7.2869 | 0.0000 | None                  |
| 252 | Human Plasma exp_4 | 22567        | Desmocollin-2                          | ANYTILK_5_4_0_2                  | None           | 3.2712 | 0.0000 | None           | 7.2967 | 0.0000 | None                  |
| 253 | Human Plasma exp_3 | 24871        | Endoplasmic reticulum aminopeptidase 2 | DLEITNATLQSEEDSR_4_3_0_1         | None           | 3.7219 | 0.0000 | None           | 7.3417 | 0.0000 | None                  |
| 254 | Human Plasma exp_4 | 25603        | Endoplasmic reticulum aminopeptidase 2 | DLEITNATLQSEEDSR_5_4_0_2         | None           | 4.2527 | 0.0000 | None           | 7.3329 | 0.0000 | None                  |
| 255 | Human Plasma exp_1 | 24701        | Fetuin-B                               | VLYLAAYNCTLRPVSK_5_4_0_1         | None           | 2.7634 | 0.0000 | None           | 7.3379 | 0.0000 | None                  |
| 256 | Human Plasma exp_1 | 22837        | Ficolin-3                              | VELEDFNGNR_5_4_1_2               | Outer          | 0.1021 | 0.3018 | None           | 5.0225 | 0.0031 | Core                  |
| 257 | Human Plasma exp_4 | 23285        | Ficolin-3                              | VELEDFNGNR_5_4_1_2               | None           | 0.4181 | 0.0493 | Core           | 6.6229 | 0.0000 | Core                  |
| 258 | Human Plasma exp_2 | 29232        | Haptoglobin                            | MVSHHNLTTGATLINEQWLLTTAK_5_4_0_2 | None           | 2.8451 | 0.0000 | None           | 7.3110 | 0.0000 | None                  |
| 259 | Human Plasma exp_1 | 27749        | Haptoglobin                            | VVLHPNYSQVDIGLIK_4_3_0_1         | None           | 3.7935 | 0.0000 | None           | 7.3491 | 0.0000 | None                  |
| 260 | Human Plasma exp_2 | 28444        | Haptoglobin                            | VVLHPNYSQVDIGLIK_4_3_0_1         | None           | 3.7801 | 0.0000 | None           | 7.3500 | 0.0000 | None                  |
| 261 | Human Plasma exp_2 | 26631        | Haptoglobin                            | VVLHPNYSQVDIGLIK_5_4_0_1         | None           | 3.2542 | 0.0000 | None           | 7.3545 | 0.0000 | None                  |
| 262 | Human Plasma exp_4 | 26593        | Haptoglobin                            | VVLHPNYSQVDIGLIK_5_4_0_1         | None           | 3.6057 | 0.0000 | None           | 7.3650 | 0.0000 | None                  |
| 263 | Human Plasma exp_1 | 27827        | Haptoglobin                            | VVLHPNYSQVDIGLIK_5_4_0_2         | None           | 3.0086 | 0.0000 | None           | 7.3337 | 0.0000 | None                  |
| 264 | Human Plasma exp_1 | 27945        | Haptoglobin                            | VVLHPNYSQVDIGLIK_5_4_0_2         | None           | 4.8218 | 0.0000 | None           | 7.3528 | 0.0000 | None                  |
| 265 | Human Plasma exp_2 | 28700        | Haptoglobin                            | VVLHPNYSQVDIGLIK_5_4_0_2         | None           | 4.6641 | 0.0000 | None           | 7.3392 | 0.0000 | None                  |
| 266 | Human Plasma exp_4 | 28201        | Haptoglobin                            | VVLHPNYSQVDIGLIK_5_4_0_2         | None           | 2.4168 | 0.0000 | None           | 7.3266 | 0.0000 | None                  |
| 267 | Human Plasma exp_4 | 28408        | Haptoglobin                            | VVLHPNYSQVDIGLIK_5_4_0_2         | None           | 4.4743 | 0.0000 | None           | 7.3416 | 0.0000 | None                  |
| 268 | Human Plasma exp_5 | 27613        | Haptoglobin                            | VVLHPNYSQVDIGLIK_5_4_0_2         | None           | 4.6410 | 0.0000 | None           | 7.3416 | 0.0000 | None                  |
| 269 | Human Plasma exp_4 | 26569        | Haptoglobin                            | VVLHPNYSQVDIGLIK_6_4_0_1         | None           | 3.2955 | 0.0000 | None           | 7.3210 | 0.0000 | None                  |
| 270 | Human Plasma exp_1 | 27654        | Haptoglobin                            | VVLHPNYSQVDIGLIK_6_5_0_2         | None           | 1.8866 | 0.0000 | None           | 7.2905 | 0.0000 | None                  |



**Supplementary Table 8. Continued.**

| No. | Experiment         | CID Scan No. | N-glycoproteins    | N-glycopeptides          | SVM            |        |        | DNN            |        |        | Manual Classification |
|-----|--------------------|--------------|--------------------|--------------------------|----------------|--------|--------|----------------|--------|--------|-----------------------|
|     |                    |              |                    |                          | Classification | Pscore | FDR    | Classification | Pscore | FDR    |                       |
| 271 | Human Plasma exp_4 | 30252        | Haptoglobin        | VVLHPNYSQVDIGLIK_6_5_0_3 | None           | 2.0617 | 0.0000 | None           | 7.2724 | 0.0000 | None                  |
| 272 | Human Plasma exp_5 | 29222        | Haptoglobin        | VVLHPNYSQVDIGLIK_6_5_0_3 | None           | 3.0873 | 0.0000 | None           | 7.2948 | 0.0000 | None                  |
| 273 | Human Plasma exp_4 | 30058        | Haptoglobin        | VVLHPNYSQVDIGLIK_6_5_1_3 | Outer          | 0.8116 | 0.0016 | Outer          | 2.8606 | 0.0164 | Outer                 |
| 274 | Human Plasma exp_2 | 30831        | Hemopexin          | ALPQPQNVTSLLGCTH_4_3_0_1 | None           | 3.6990 | 0.0000 | None           | 7.3329 | 0.0000 | None                  |
| 275 | Human Plasma exp_3 | 30305        | Hemopexin          | ALPQPQNVTSLLGCTH_4_3_0_1 | None           | 3.6300 | 0.0000 | None           | 7.3374 | 0.0000 | None                  |
| 276 | Human Plasma exp_1 | 30204        | Hemopexin          | ALPQPQNVTSLLGCTH_5_4_0_2 | None           | 3.5207 | 0.0000 | None           | 7.3224 | 0.0000 | None                  |
| 277 | Human Plasma exp_2 | 30901        | Hemopexin          | ALPQPQNVTSLLGCTH_5_4_0_2 | None           | 4.7268 | 0.0000 | None           | 7.3673 | 0.0000 | None                  |
| 278 | Human Plasma exp_3 | 30491        | Hemopexin          | ALPQPQNVTSLLGCTH_5_4_0_2 | None           | 3.9039 | 0.0000 | None           | 7.3212 | 0.0000 | None                  |
| 279 | Human Plasma exp_4 | 30501        | Hemopexin          | ALPQPQNVTSLLGCTH_5_4_0_2 | None           | 2.7571 | 0.0000 | None           | 7.3178 | 0.0000 | None                  |
| 280 | Human Plasma exp_5 | 29783        | Hemopexin          | ALPQPQNVTSLLGCTH_5_4_0_2 | None           | 3.4125 | 0.0000 | None           | 7.3345 | 0.0000 | None                  |
| 281 | Human Plasma exp_1 | 22530        | Hemopexin          | SWPAVGNCSSALR_5_4_0_1    | None           | 2.8997 | 0.0000 | None           | 7.2872 | 0.0000 | None                  |
| 282 | Human Plasma exp_1 | 25393        | Hemopexin          | SWPAVGNCSSALR_5_4_0_2    | None           | 4.3824 | 0.0000 | None           | 7.3332 | 0.0000 | None                  |
| 283 | Human Plasma exp_2 | 25885        | Hemopexin          | SWPAVGNCSSALR_5_4_0_2    | None           | 3.6904 | 0.0000 | None           | 7.3214 | 0.0000 | None                  |
| 284 | Human Plasma exp_3 | 25563        | Hemopexin          | SWPAVGNCSSALR_5_4_0_2    | None           | 4.0522 | 0.0000 | None           | 7.3332 | 0.0000 | None                  |
| 285 | Human Plasma exp_4 | 25835        | Hemopexin          | SWPAVGNCSSALR_5_4_0_2    | None           | 4.2874 | 0.0000 | None           | 7.3423 | 0.0000 | None                  |
| 286 | Human Plasma exp_5 | 25332        | Hemopexin          | SWPAVGNCSSALR_5_4_0_2    | None           | 2.3141 | 0.0000 | None           | 7.2926 | 0.0000 | None                  |
| 287 | Human Plasma exp_2 | 25764        | Hemopexin          | SWPAVGNCSSALR_5_4_1_2    | Core           | 7.4996 | 0.0000 | Core           | 6.5995 | 0.0018 | Core                  |
| 288 | Human Plasma exp_4 | 25753        | Hemopexin          | SWPAVGNCSSALR_5_4_1_2    | Core           | 6.6415 | 0.0000 | Core           | 6.6146 | 0.0020 | Core                  |
| 289 | Human Plasma exp_5 | 24981        | Hemopexin          | SWPAVGNCSSALR_5_4_1_2    | Core           | 3.6350 | 0.0000 | Core           | 6.6365 | 0.0000 | Core                  |
| 290 | Human Plasma exp_3 | 25158        | Hemopexin          | SWPAVGNCSSALR_6_5_0_2    | None           | 2.4778 | 0.0000 | None           | 7.2993 | 0.0000 | None                  |
| 291 | Human Plasma exp_4 | 28467        | Hemopexin          | SWPAVGNCSSALR_6_5_1_3    | Outer          | 0.9650 | 0.0000 | Outer          | 6.1299 | 0.0032 | Outer                 |
| 292 | Human Plasma exp_1 | 15042        | Heparin cofactor 2 | DFVNASSK_5_4_0_2         | None           | 3.6296 | 0.0000 | None           | 7.3065 | 0.0000 | None                  |
| 293 | Human Plasma exp_1 | 15007        | Heparin cofactor 2 | DFVNASSK_5_4_0_2         | None           | 2.4679 | 0.0000 | None           | 7.2658 | 0.0000 | None                  |
| 294 | Human Plasma exp_2 | 15333        | Heparin cofactor 2 | DFVNASSK_5_4_0_2         | None           | 3.7051 | 0.0000 | None           | 7.3070 | 0.0000 | None                  |
| 295 | Human Plasma exp_3 | 15064        | Heparin cofactor 2 | DFVNASSK_5_4_0_2         | None           | 3.5426 | 0.0000 | None           | 7.2882 | 0.0000 | None                  |
| 296 | Human Plasma exp_4 | 15380        | Heparin cofactor 2 | DFVNASSK_5_4_0_2         | None           | 3.6534 | 0.0000 | None           | 7.3045 | 0.0000 | None                  |
| 297 | Human Plasma exp_4 | 15384        | Heparin cofactor 2 | DFVNASSK_5_4_0_2         | None           | 3.0723 | 0.0000 | None           | 7.2999 | 0.0000 | None                  |
| 298 | Human Plasma exp_5 | 15145        | Heparin cofactor 2 | DFVNASSK_5_4_0_2         | None           | 3.6155 | 0.0000 | None           | 7.3107 | 0.0000 | None                  |
| 299 | Human Plasma exp_1 | 20220        | Heparin cofactor 2 | DFVNASSK_6_5_0_3         | None           | 2.5196 | 0.0000 | None           | 7.2760 | 0.0000 | None                  |
| 300 | Human Plasma exp_2 | 20659        | Heparin cofactor 2 | DFVNASSK_6_5_0_3         | None           | 1.9824 | 0.0000 | None           | 7.2614 | 0.0000 | None                  |

Supplementary Table 8. Continued.

| No. | Experiment         | CID Scan No. | N-glycoproteins                       | N-glycopeptides             | SVM            |        |        | DNN            |        |        | Manual Classification |
|-----|--------------------|--------------|---------------------------------------|-----------------------------|----------------|--------|--------|----------------|--------|--------|-----------------------|
|     |                    |              |                                       |                             | Classification | Pscore | FDR    | Classification | Pscore | FDR    |                       |
| 301 | Human Plasma exp_3 | 20040        | Heparin cofactor 2                    | DFVNASSK_6_5_0_3            | None           | 1.8391 | 0.0000 | None           | 7.2531 | 0.0000 | None                  |
| 302 | Human Plasma exp_4 | 20540        | Heparin cofactor 2                    | DFVNASSK_6_5_0_3            | None           | 2.4249 | 0.0000 | None           | 7.2727 | 0.0000 | None                  |
| 303 | Human Plasma exp_5 | 20269        | Heparin cofactor 2                    | DFVNASSK_6_5_0_3            | None           | 1.9257 | 0.0000 | None           | 7.2552 | 0.0000 | None                  |
| 304 | Human Plasma exp_1 | 29227        | Heparin cofactor 2                    | NLSMPLLPADPHK_5_4_0_2       | None           | 3.0472 | 0.0000 | None           | 7.3321 | 0.0000 | None                  |
| 305 | Human Plasma exp_2 | 29952        | Heparin cofactor 2                    | NLSMPLLPADPHK_5_4_0_2       | None           | 3.8160 | 0.0000 | None           | 7.3332 | 0.0000 | None                  |
| 306 | Human Plasma exp_4 | 29698        | Heparin cofactor 2                    | NLSMPLLPADPHK_5_4_0_2       | None           | 4.0721 | 0.0000 | None           | 7.3386 | 0.0000 | None                  |
| 307 | Human Plasma exp_5 | 28803        | Heparin cofactor 2                    | NLSMPLLPADPHK_5_4_0_2       | None           | 3.7659 | 0.0000 | None           | 7.3314 | 0.0000 | None                  |
| 308 | Human Plasma exp_3 | 2935         | Heparin cofactor 2                    | SMTNR_4_3_0_1               | None           | 2.9830 | 0.0000 | None           | 7.3285 | 0.0000 | None                  |
| 309 | Human Plasma exp_2 | 3065         | Heparin cofactor 2                    | SMTNR_5_4_0_2               | None           | 3.3049 | 0.0000 | None           | 7.3017 | 0.0000 | None                  |
| 310 | Human Plasma exp_3 | 2996         | Heparin cofactor 2                    | SMTNR_5_4_0_2               | None           | 3.0791 | 0.0000 | None           | 7.2837 | 0.0000 | None                  |
| 311 | Human Plasma exp_4 | 3050         | Heparin cofactor 2                    | SMTNR_5_4_0_2               | None           | 3.2189 | 0.0000 | None           | 7.3017 | 0.0000 | None                  |
| 312 | Human Plasma exp_5 | 3015         | Heparin cofactor 2                    | SMTNR_5_4_0_2               | None           | 2.6526 | 0.0000 | None           | 7.2781 | 0.0000 | None                  |
| 313 | Human Plasma exp_4 | 24610        | Hepatocyte growth factor activator    | DSVSVVLGQHFFNR_5_4_0_2      | None           | 2.5483 | 0.0000 | None           | 7.3049 | 0.0000 | None                  |
| 314 | Human Plasma exp_2 | 12959        | Hepatocyte growth factor-like protein | GTANTTTAGVPCQR_5_4_0_2      | None           | 3.4340 | 0.0000 | None           | 7.2964 | 0.0000 | None                  |
| 315 | Human Plasma exp_5 | 12805        | Hepatocyte growth factor-like protein | GTANTTTAGVPCQR_5_4_0_2      | None           | 2.5424 | 0.0000 | None           | 7.3135 | 0.0000 | None                  |
| 316 | Human Plasma exp_1 | 26936        | Histidine-rich glycoprotein           | VIDFNCTTSSVSSALANTK_5_4_0_1 | None           | 3.1621 | 0.0000 | None           | 7.3606 | 0.0000 | None                  |
| 317 | Human Plasma exp_2 | 27613        | Histidine-rich glycoprotein           | VIDFNCTTSSVSSALANTK_5_4_0_1 | None           | 3.5137 | 0.0000 | None           | 7.3534 | 0.0000 | None                  |
| 318 | Human Plasma exp_3 | 27037        | Histidine-rich glycoprotein           | VIDFNCTTSSVSSALANTK_5_4_0_1 | None           | 3.8993 | 0.0000 | None           | 7.3563 | 0.0000 | None                  |
| 319 | Human Plasma exp_4 | 27387        | Histidine-rich glycoprotein           | VIDFNCTTSSVSSALANTK_5_4_0_1 | None           | 5.6899 | 0.0000 | None           | 7.3581 | 0.0000 | None                  |
| 320 | Human Plasma exp_5 | 26632        | Histidine-rich glycoprotein           | VIDFNCTTSSVSSALANTK_5_4_0_1 | None           | 4.0033 | 0.0000 | None           | 7.3486 | 0.0000 | None                  |
| 321 | Human Plasma exp_5 | 26637        | Histidine-rich glycoprotein           | VIDFNCTTSSVSSALANTK_5_4_0_1 | None           | 3.5932 | 0.0000 | None           | 7.3097 | 0.0000 | None                  |
| 322 | Human Plasma exp_1 | 28732        | Histidine-rich glycoprotein           | VIDFNCTTSSVSSALANTK_5_4_0_2 | None           | 3.9004 | 0.0000 | None           | 7.3436 | 0.0000 | None                  |
| 323 | Human Plasma exp_2 | 29468        | Histidine-rich glycoprotein           | VIDFNCTTSSVSSALANTK_5_4_0_2 | None           | 2.5156 | 0.0000 | None           | 7.3033 | 0.0000 | None                  |
| 324 | Human Plasma exp_3 | 28937        | Histidine-rich glycoprotein           | VIDFNCTTSSVSSALANTK_5_4_0_2 | None           | 3.1945 | 0.0000 | None           | 7.3245 | 0.0000 | None                  |
| 325 | Human Plasma exp_4 | 29242        | Histidine-rich glycoprotein           | VIDFNCTTSSVSSALANTK_5_4_0_2 | None           | 4.4665 | 0.0000 | None           | 7.3492 | 0.0000 | None                  |
| 326 | Human Plasma exp_5 | 28374        | Histidine-rich glycoprotein           | VIDFNCTTSSVSSALANTK_5_4_0_2 | None           | 2.9516 | 0.0000 | None           | 7.3047 | 0.0000 | None                  |
| 327 | Human Plasma exp_5 | 17358        | ICOS ligand                           | LFNVTPQDEQK_5_5_1_1         | Core           | 2.9715 | 0.0000 | None           | 6.7795 | 0.0000 | Core                  |
| 328 | Human Plasma exp_1 | 20768        | ICOS ligand                           | LFNVTPQDEQK_5_5_1_2         | Core           | 0.7874 | 0.0016 | None           | 6.7247 | 0.0000 | Core                  |
| 329 | Human Plasma exp_4 | 21096        | ICOS ligand                           | LFNVTPQDEQK_5_5_1_2         | Core           | 0.9385 | 0.0000 | None           | 7.0710 | 0.0000 | Core                  |
| 330 | Human Plasma exp_4 | 21041        | ICOS ligand                           | LFNVTPQDEQK_5_5_1_2         | None           | 0.1318 | 0.2609 | None           | 7.1801 | 0.0000 | Core                  |

**Supplementary Table 8. Continued.**

| No. | Experiment         | CID Scan No. | N-glycoproteins           | N-glycopeptides   | SVM            |         |        | DNN            |        |        | Manual Classification |
|-----|--------------------|--------------|---------------------------|-------------------|----------------|---------|--------|----------------|--------|--------|-----------------------|
|     |                    |              |                           |                   | Classification | Pscore  | FDR    | Classification | Pscore | FDR    |                       |
| 331 | Human Plasma exp_1 | 15025        | Ig alpha-2 chain C region | TPLTANITK_5_4_1_1 | Core           | 0.1638  | 0.2117 | Core           | 6.6684 | 0.0000 | Core                  |
| 332 | Human Plasma exp_2 | 15335        | Ig alpha-2 chain C region | TPLTANITK_5_4_1_1 | Core           | 0.0527  | 0.3690 | Core           | 6.6914 | 0.0000 | Core                  |
| 333 | Human Plasma exp_3 | 14878        | Ig alpha-2 chain C region | TPLTANITK_5_4_1_1 | Core           | 6.8810  | 0.0000 | Core           | 6.5681 | 0.0017 | Core                  |
| 334 | Human Plasma exp_4 | 15175        | Ig alpha-2 chain C region | TPLTANITK_5_4_1_1 | Core           | 12.0797 | 0.0000 | Core           | 6.5603 | 0.0017 | Core                  |
| 335 | Human Plasma exp_3 | 18898        | Ig alpha-2 chain C region | TPLTANITK_5_4_1_2 | Core           | 10.5653 | 0.0000 | Core           | 6.5557 | 0.0017 | Core                  |
| 336 | Human Plasma exp_3 | 15007        | Ig alpha-2 chain C region | TPLTANITK_5_5_1_1 | None           | 1.8911  | 0.0000 | None           | 7.1459 | 0.0000 | Core                  |
| 337 | Human Plasma exp_3 | 14995        | Ig alpha-2 chain C region | TPLTANITK_5_5_1_1 | Core           | 2.7258  | 0.0000 | Core           | 6.5886 | 0.0017 | Core                  |
| 338 | Human Plasma exp_4 | 15325        | Ig alpha-2 chain C region | TPLTANITK_5_5_1_1 | None           | 1.9013  | 0.0000 | None           | 7.1110 | 0.0000 | Core                  |
| 339 | Human Plasma exp_4 | 15315        | Ig alpha-2 chain C region | TPLTANITK_5_5_1_1 | Core           | 2.0224  | 0.0000 | Core           | 6.5885 | 0.0017 | Core                  |
| 340 | Human Plasma exp_3 | 18979        | Ig alpha-2 chain C region | TPLTANITK_5_5_1_2 | None           | 1.8801  | 0.0000 | None           | 7.2415 | 0.0000 | Core                  |
| 341 | Human Plasma exp_1 | 5651         | Ig gamma-1 chain C region | EEQYNSTYR_3_3_0_0 | None           | 3.4156  | 0.0000 | None           | 7.2130 | 0.0000 | None                  |
| 342 | Human Plasma exp_2 | 5984         | Ig gamma-1 chain C region | EEQYNSTYR_3_3_0_0 | None           | 3.7591  | 0.0000 | None           | 7.2332 | 0.0000 | None                  |
| 343 | Human Plasma exp_3 | 5945         | Ig gamma-1 chain C region | EEQYNSTYR_3_3_0_0 | None           | 3.4839  | 0.0000 | None           | 7.0972 | 0.0000 | None                  |
| 344 | Human Plasma exp_4 | 5801         | Ig gamma-1 chain C region | EEQYNSTYR_3_3_0_0 | None           | 3.4264  | 0.0000 | None           | 7.2468 | 0.0000 | None                  |
| 345 | Human Plasma exp_5 | 5913         | Ig gamma-1 chain C region | EEQYNSTYR_3_3_0_0 | None           | 3.6218  | 0.0000 | None           | 7.1855 | 0.0000 | None                  |
| 346 | Human Plasma exp_1 | 4903         | Ig gamma-1 chain C region | EEQYNSTYR_3_3_1_0 | Core           | 8.0122  | 0.0000 | Core           | 6.6149 | 0.0020 | Core                  |
| 347 | Human Plasma exp_2 | 5416         | Ig gamma-1 chain C region | EEQYNSTYR_3_3_1_0 | Core           | 6.6961  | 0.0000 | Core           | 6.6283 | 0.0000 | Core                  |
| 348 | Human Plasma exp_3 | 5245         | Ig gamma-1 chain C region | EEQYNSTYR_3_3_1_0 | Core           | 6.5144  | 0.0000 | Core           | 6.5816 | 0.0017 | Core                  |
| 349 | Human Plasma exp_4 | 5932         | Ig gamma-1 chain C region | EEQYNSTYR_3_3_1_0 | Core           | 8.0587  | 0.0000 | Core           | 6.6199 | 0.0000 | Core                  |
| 350 | Human Plasma exp_1 | 5791         | Ig gamma-1 chain C region | EEQYNSTYR_3_4_0_0 | None           | 3.3375  | 0.0000 | None           | 7.1780 | 0.0000 | None                  |
| 351 | Human Plasma exp_2 | 5966         | Ig gamma-1 chain C region | EEQYNSTYR_3_4_0_0 | None           | 3.3858  | 0.0000 | None           | 7.2389 | 0.0000 | None                  |
| 352 | Human Plasma exp_4 | 5765         | Ig gamma-1 chain C region | EEQYNSTYR_3_4_0_0 | None           | 3.1882  | 0.0000 | None           | 7.1970 | 0.0000 | None                  |
| 353 | Human Plasma exp_1 | 5706         | Ig gamma-1 chain C region | EEQYNSTYR_3_4_1_0 | Core           | 5.0007  | 0.0000 | Core           | 6.6548 | 0.0000 | Core                  |
| 354 | Human Plasma exp_2 | 5595         | Ig gamma-1 chain C region | EEQYNSTYR_3_4_1_0 | Core           | 7.3394  | 0.0000 | Core           | 6.6336 | 0.0000 | Core                  |
| 355 | Human Plasma exp_3 | 5880         | Ig gamma-1 chain C region | EEQYNSTYR_3_4_1_0 | Core           | 4.9492  | 0.0000 | Core           | 6.6568 | 0.0000 | Core                  |
| 356 | Human Plasma exp_4 | 6195         | Ig gamma-1 chain C region | EEQYNSTYR_3_4_1_0 | Core           | 3.7498  | 0.0000 | Core           | 6.6216 | 0.0000 | Core                  |
| 357 | Human Plasma exp_5 | 5784         | Ig gamma-1 chain C region | EEQYNSTYR_3_4_1_0 | Core           | 5.1326  | 0.0000 | Core           | 6.6539 | 0.0000 | Core                  |
| 358 | Human Plasma exp_1 | 5580         | Ig gamma-1 chain C region | EEQYNSTYR_4_3_0_0 | None           | 3.2110  | 0.0000 | None           | 7.1457 | 0.0000 | None                  |
| 359 | Human Plasma exp_2 | 5693         | Ig gamma-1 chain C region | EEQYNSTYR_4_3_0_0 | None           | 3.3073  | 0.0000 | None           | 7.0872 | 0.0000 | None                  |
| 360 | Human Plasma exp_3 | 5646         | Ig gamma-1 chain C region | EEQYNSTYR_4_3_0_0 | None           | 3.2310  | 0.0000 | None           | 7.1279 | 0.0000 | None                  |

**Supplementary Table 8. Continued.**

| No. | Experiment         | CID Scan No. | N-glycoproteins           | N-glycopeptides   | SVM            |        |        | DNN            |        |        | Manual Classification |
|-----|--------------------|--------------|---------------------------|-------------------|----------------|--------|--------|----------------|--------|--------|-----------------------|
|     |                    |              |                           |                   | Classification | Pscore | FDR    | Classification | Pscore | FDR    |                       |
| 361 | Human Plasma exp_4 | 5772         | Ig gamma-1 chain C region | EEQYNSTYR_4_3_0_0 | None           | 3.1364 | 0.0000 | None           | 7.0841 | 0.0000 | None                  |
| 362 | Human Plasma exp_5 | 5618         | Ig gamma-1 chain C region | EEQYNSTYR_4_3_0_0 | None           | 2.7984 | 0.0000 | None           | 7.0039 | 0.0000 | None                  |
| 363 | Human Plasma exp_1 | 5687         | Ig gamma-1 chain C region | EEQYNSTYR_4_3_1_0 | Core           | 7.1028 | 0.0000 | Core           | 6.6086 | 0.0019 | Core                  |
| 364 | Human Plasma exp_2 | 5992         | Ig gamma-1 chain C region | EEQYNSTYR_4_3_1_0 | Core           | 4.8045 | 0.0000 | Core           | 6.6135 | 0.0020 | Core                  |
| 365 | Human Plasma exp_3 | 5972         | Ig gamma-1 chain C region | EEQYNSTYR_4_3_1_0 | Core           | 5.9932 | 0.0000 | Core           | 6.5996 | 0.0018 | Core                  |
| 366 | Human Plasma exp_5 | 5753         | Ig gamma-1 chain C region | EEQYNSTYR_4_3_1_0 | Core           | 5.7770 | 0.0000 | Core           | 6.6114 | 0.0020 | Core                  |
| 367 | Human Plasma exp_1 | 9068         | Ig gamma-1 chain C region | EEQYNSTYR_4_3_1_1 | Core           | 2.1047 | 0.0000 | Core           | 6.6468 | 0.0000 | Core                  |
| 368 | Human Plasma exp_2 | 9215         | Ig gamma-1 chain C region | EEQYNSTYR_4_3_1_1 | Core           | 4.7062 | 0.0000 | Core           | 6.5955 | 0.0018 | Core                  |
| 369 | Human Plasma exp_3 | 9230         | Ig gamma-1 chain C region | EEQYNSTYR_4_3_1_1 | None           | 0.7896 | 0.0016 | Core           | 6.6504 | 0.0000 | Core                  |
| 370 | Human Plasma exp_3 | 8948         | Ig gamma-1 chain C region | EEQYNSTYR_4_3_1_1 | Core           | 5.3945 | 0.0000 | Core           | 6.6117 | 0.0020 | Core                  |
| 371 | Human Plasma exp_4 | 9278         | Ig gamma-1 chain C region | EEQYNSTYR_4_3_1_1 | Core           | 4.9594 | 0.0000 | Core           | 6.5996 | 0.0018 | Core                  |
| 372 | Human Plasma exp_5 | 9233         | Ig gamma-1 chain C region | EEQYNSTYR_4_3_1_1 | None           | 1.0723 | 0.0000 | None           | 7.2606 | 0.0000 | Core                  |
| 373 | Human Plasma exp_5 | 9174         | Ig gamma-1 chain C region | EEQYNSTYR_4_3_1_1 | Core           | 6.2737 | 0.0000 | Core           | 6.6148 | 0.0020 | Core                  |
| 374 | Human Plasma exp_3 | 5448         | Ig gamma-1 chain C region | EEQYNSTYR_4_4_0_0 | None           | 3.0554 | 0.0000 | None           | 6.9059 | 0.0000 | None                  |
| 375 | Human Plasma exp_5 | 5420         | Ig gamma-1 chain C region | EEQYNSTYR_4_4_0_0 | None           | 2.7446 | 0.0000 | None           | 6.9433 | 0.0000 | None                  |
| 376 | Human Plasma exp_1 | 5611         | Ig gamma-1 chain C region | EEQYNSTYR_4_4_1_0 | Core           | 6.8716 | 0.0000 | Core           | 6.6426 | 0.0000 | Core                  |
| 377 | Human Plasma exp_1 | 4872         | Ig gamma-1 chain C region | EEQYNSTYR_4_4_1_0 | Core           | 4.1214 | 0.0000 | Core           | 6.5761 | 0.0017 | Core                  |
| 378 | Human Plasma exp_2 | 6129         | Ig gamma-1 chain C region | EEQYNSTYR_4_4_1_0 | Core           | 4.9041 | 0.0000 | Core           | 6.5755 | 0.0017 | Core                  |
| 379 | Human Plasma exp_3 | 5899         | Ig gamma-1 chain C region | EEQYNSTYR_4_4_1_0 | Core           | 6.6111 | 0.0000 | Core           | 6.6480 | 0.0000 | Core                  |
| 380 | Human Plasma exp_3 | 4946         | Ig gamma-1 chain C region | EEQYNSTYR_4_4_1_0 | Core           | 4.2492 | 0.0000 | Core           | 6.5741 | 0.0017 | Core                  |
| 381 | Human Plasma exp_4 | 6207         | Ig gamma-1 chain C region | EEQYNSTYR_4_4_1_0 | Core           | 2.3068 | 0.0000 | Core           | 6.5738 | 0.0017 | Core                  |
| 382 | Human Plasma exp_5 | 5715         | Ig gamma-1 chain C region | EEQYNSTYR_4_4_1_0 | Core           | 6.4614 | 0.0000 | Core           | 6.6510 | 0.0000 | Core                  |
| 383 | Human Plasma exp_1 | 9178         | Ig gamma-1 chain C region | EEQYNSTYR_4_4_1_1 | Core           | 3.6092 | 0.0000 | Core           | 6.6278 | 0.0000 | Core                  |
| 384 | Human Plasma exp_1 | 9252         | Ig gamma-1 chain C region | EEQYNSTYR_4_4_1_1 | Core           | 2.1850 | 0.0000 | Core           | 3.9980 | 0.0091 | Core                  |
| 385 | Human Plasma exp_2 | 9369         | Ig gamma-1 chain C region | EEQYNSTYR_4_4_1_1 | Core           | 4.3809 | 0.0000 | Core           | 6.6225 | 0.0000 | Core                  |
| 386 | Human Plasma exp_3 | 9342         | Ig gamma-1 chain C region | EEQYNSTYR_4_4_1_1 | Core           | 5.4695 | 0.0000 | Core           | 6.6172 | 0.0000 | Core                  |
| 387 | Human Plasma exp_3 | 9412         | Ig gamma-1 chain C region | EEQYNSTYR_4_4_1_1 | None           | 1.0254 | 0.0000 | None           | 6.3530 | 0.0033 | Core                  |
| 388 | Human Plasma exp_4 | 9262         | Ig gamma-1 chain C region | EEQYNSTYR_4_4_1_1 | None           | 2.2294 | 0.0000 | None           | 6.7849 | 0.0000 | Core                  |
| 389 | Human Plasma exp_5 | 9379         | Ig gamma-1 chain C region | EEQYNSTYR_4_4_1_1 | Core           | 1.6085 | 0.0000 | Core           | 4.7335 | 0.0046 | Core                  |
| 390 | Human Plasma exp_2 | 6300         | Ig gamma-1 chain C region | EEQYNSTYR_4_5_1_0 | Core           | 3.7609 | 0.0000 | Core           | 6.5902 | 0.0017 | Core                  |

**Supplementary Table 8. Continued.**

| No. | Experiment         | CID Scan No. | N-glycoproteins           | N-glycopeptides   | SVM            |        |        | DNN            |        |        | Manual Classification |
|-----|--------------------|--------------|---------------------------|-------------------|----------------|--------|--------|----------------|--------|--------|-----------------------|
|     |                    |              |                           |                   | Classification | Pscore | FDR    | Classification | Pscore | FDR    |                       |
| 391 | Human Plasma exp_4 | 6672         | Ig gamma-1 chain C region | EEQYNSTYR_4_5_1_0 | Core           | 4.1492 | 0.0000 | Core           | 6.6017 | 0.0018 | Core                  |
| 392 | Human Plasma exp_5 | 6286         | Ig gamma-1 chain C region | EEQYNSTYR_4_5_1_0 | Core           | 3.4656 | 0.0000 | Core           | 6.6053 | 0.0019 | Core                  |
| 393 | Human Plasma exp_1 | 8778         | Ig gamma-1 chain C region | EEQYNSTYR_5_3_1_1 | Core           | 0.3065 | 0.0769 | Core           | 6.1964 | 0.0032 | Core                  |
| 394 | Human Plasma exp_2 | 8934         | Ig gamma-1 chain C region | EEQYNSTYR_5_3_1_1 | None           | 0.2469 | 0.1081 | Core           | 2.7110 | 0.0163 | Core                  |
| 395 | Human Plasma exp_3 | 8958         | Ig gamma-1 chain C region | EEQYNSTYR_5_3_1_1 | None           | 0.0821 | 0.3262 | Core           | 6.7505 | 0.0000 | Core                  |
| 396 | Human Plasma exp_2 | 5454         | Ig gamma-1 chain C region | EEQYNSTYR_5_4_0_0 | None           | 2.8121 | 0.0000 | None           | 6.9588 | 0.0000 | None                  |
| 397 | Human Plasma exp_1 | 9244         | Ig gamma-1 chain C region | EEQYNSTYR_5_4_0_1 | None           | 2.5362 | 0.0000 | None           | 6.8520 | 0.0000 | None                  |
| 398 | Human Plasma exp_3 | 9198         | Ig gamma-1 chain C region | EEQYNSTYR_5_4_0_1 | None           | 2.9776 | 0.0000 | None           | 6.8466 | 0.0000 | None                  |
| 399 | Human Plasma exp_1 | 5809         | Ig gamma-1 chain C region | EEQYNSTYR_5_4_1_0 | Core           | 3.9837 | 0.0000 | Core           | 6.5966 | 0.0018 | Core                  |
| 400 | Human Plasma exp_2 | 5741         | Ig gamma-1 chain C region | EEQYNSTYR_5_4_1_0 | Core           | 4.0015 | 0.0000 | Core           | 6.6046 | 0.0018 | Core                  |
| 401 | Human Plasma exp_4 | 5782         | Ig gamma-1 chain C region | EEQYNSTYR_5_4_1_0 | Core           | 3.9563 | 0.0000 | Core           | 6.6050 | 0.0019 | Core                  |
| 402 | Human Plasma exp_1 | 8799         | Ig gamma-1 chain C region | EEQYNSTYR_5_4_1_1 | Core           | 2.3825 | 0.0000 | Core           | 6.5951 | 0.0018 | Core                  |
| 403 | Human Plasma exp_2 | 9326         | Ig gamma-1 chain C region | EEQYNSTYR_5_4_1_1 | Core           | 2.8790 | 0.0000 | Core           | 6.5984 | 0.0018 | Core                  |
| 404 | Human Plasma exp_3 | 9160         | Ig gamma-1 chain C region | EEQYNSTYR_5_4_1_1 | None           | 1.3434 | 0.0000 | Core           | 0.4912 | 0.2429 | Core                  |
| 405 | Human Plasma exp_3 | 9256         | Ig gamma-1 chain C region | EEQYNSTYR_5_4_1_1 | Core           | 5.0919 | 0.0000 | Core           | 6.6004 | 0.0018 | Core                  |
| 406 | Human Plasma exp_4 | 9273         | Ig gamma-1 chain C region | EEQYNSTYR_5_4_1_1 | Core           | 2.7898 | 0.0000 | Core           | 6.7004 | 0.0000 | Core                  |
| 407 | Human Plasma exp_4 | 8887         | Ig gamma-1 chain C region | EEQYNSTYR_5_4_1_1 | None           | 1.1256 | 0.0000 | None           | 7.0443 | 0.0000 | Core                  |
| 408 | Human Plasma exp_4 | 9393         | Ig gamma-1 chain C region | EEQYNSTYR_5_4_1_1 | Core           | 3.1149 | 0.0000 | Core           | 6.5933 | 0.0018 | Core                  |
| 409 | Human Plasma exp_5 | 9296         | Ig gamma-1 chain C region | EEQYNSTYR_5_4_1_1 | Core           | 5.6482 | 0.0000 | Core           | 6.5956 | 0.0018 | Core                  |
| 410 | Human Plasma exp_1 | 12580        | Ig gamma-1 chain C region | EEQYNSTYR_5_4_1_2 | None           | 0.6358 | 0.0126 | Core           | 2.2296 | 0.0177 | Core                  |
| 411 | Human Plasma exp_2 | 13332        | Ig gamma-1 chain C region | EEQYNSTYR_5_4_1_2 | None           | 0.3947 | 0.0517 | Core           | 6.5049 | 0.0033 | Core                  |
| 412 | Human Plasma exp_1 | 5106         | Ig gamma-1 chain C region | EEQYNSTYR_5_4_2_0 | Outer          | 2.8284 | 0.0000 | Dual           | 3.0856 | 0.0135 | Dual                  |
| 413 | Human Plasma exp_5 | 5153         | Ig gamma-1 chain C region | EEQYNSTYR_5_4_2_0 | Outer          | 4.6493 | 0.0000 | Outer          | 2.9382 | 0.0149 | Dual                  |
| 414 | Human Plasma exp_2 | 8733         | Ig gamma-1 chain C region | EEQYNSTYR_5_4_2_1 | Dual           | 3.1380 | 0.0000 | Dual           | 6.1025 | 0.0032 | Dual                  |
| 415 | Human Plasma exp_3 | 8719         | Ig gamma-1 chain C region | EEQYNSTYR_5_4_2_1 | Dual           | 6.2931 | 0.0000 | Dual           | 6.4383 | 0.0033 | Dual                  |
| 416 | Human Plasma exp_5 | 8692         | Ig gamma-1 chain C region | EEQYNSTYR_5_4_2_1 | Dual           | 0.4636 | 0.0423 | Dual           | 5.4829 | 0.0031 | Dual                  |
| 417 | Human Plasma exp_4 | 6478         | Ig gamma-1 chain C region | EEQYNSTYR_5_5_1_0 | Core           | 4.2032 | 0.0000 | Core           | 6.5967 | 0.0018 | Core                  |
| 418 | Human Plasma exp_4 | 13165        | Ig gamma-1 chain C region | EEQYNSTYR_5_5_1_2 | None           | 0.0650 | 0.3496 | None           | 3.9769 | 0.0091 | Core                  |
| 419 | Human Plasma exp_1 | 13538        | Ig gamma-2 chain C region | EEQFNSTFR_3_3_0_0 | None           | 3.0048 | 0.0000 | None           | 6.9517 | 0.0000 | None                  |
| 420 | Human Plasma exp_2 | 13787        | Ig gamma-2 chain C region | EEQFNSTFR_3_3_0_0 | None           | 3.1988 | 0.0000 | None           | 7.0375 | 0.0000 | None                  |

**Supplementary Table 8. Continued.**

| No. | Experiment         | CID Scan No. | N-glycoproteins           | N-glycopeptides   | SVM            |         |        | DNN            |        |        | Manual Classification |
|-----|--------------------|--------------|---------------------------|-------------------|----------------|---------|--------|----------------|--------|--------|-----------------------|
|     |                    |              |                           |                   | Classification | Pscore  | FDR    | Classification | Pscore | FDR    |                       |
| 421 | Human Plasma exp_5 | 13409        | Ig gamma-2 chain C region | EEQFNSTFR_3_3_0_0 | None           | 3.6436  | 0.0000 | None           | 7.3220 | 0.0000 | None                  |
| 422 | Human Plasma exp_1 | 13210        | Ig gamma-2 chain C region | EEQFNSTFR_3_3_1_0 | Core           | 4.7546  | 0.0000 | Core           | 6.6179 | 0.0000 | Core                  |
| 423 | Human Plasma exp_2 | 13462        | Ig gamma-2 chain C region | EEQFNSTFR_3_3_1_0 | Core           | 4.9152  | 0.0000 | Core           | 6.6095 | 0.0019 | Core                  |
| 424 | Human Plasma exp_3 | 13359        | Ig gamma-2 chain C region | EEQFNSTFR_3_3_1_0 | Core           | 2.1707  | 0.0000 | Core           | 6.6492 | 0.0000 | Core                  |
| 425 | Human Plasma exp_4 | 13471        | Ig gamma-2 chain C region | EEQFNSTFR_3_3_1_0 | Core           | 3.2842  | 0.0000 | Core           | 6.6313 | 0.0000 | Core                  |
| 426 | Human Plasma exp_5 | 13258        | Ig gamma-2 chain C region | EEQFNSTFR_3_3_1_0 | Core           | 4.2329  | 0.0000 | Core           | 6.6252 | 0.0000 | Core                  |
| 427 | Human Plasma exp_1 | 13593        | Ig gamma-2 chain C region | EEQFNSTFR_3_4_0_0 | None           | 3.1602  | 0.0000 | None           | 7.1567 | 0.0000 | None                  |
| 428 | Human Plasma exp_4 | 13856        | Ig gamma-2 chain C region | EEQFNSTFR_3_4_0_0 | None           | 3.1877  | 0.0000 | None           | 7.1454 | 0.0000 | None                  |
| 429 | Human Plasma exp_1 | 13683        | Ig gamma-2 chain C region | EEQFNSTFR_3_4_1_0 | Core           | 5.1659  | 0.0000 | Core           | 6.6519 | 0.0000 | Core                  |
| 430 | Human Plasma exp_2 | 13906        | Ig gamma-2 chain C region | EEQFNSTFR_3_4_1_0 | Core           | 5.2147  | 0.0000 | Core           | 6.6555 | 0.0000 | Core                  |
| 431 | Human Plasma exp_3 | 13833        | Ig gamma-2 chain C region | EEQFNSTFR_3_4_1_0 | Core           | 5.1621  | 0.0000 | Core           | 6.6555 | 0.0000 | Core                  |
| 432 | Human Plasma exp_4 | 13958        | Ig gamma-2 chain C region | EEQFNSTFR_3_4_1_0 | Core           | 4.8508  | 0.0000 | Core           | 6.6503 | 0.0000 | Core                  |
| 433 | Human Plasma exp_5 | 13749        | Ig gamma-2 chain C region | EEQFNSTFR_3_4_1_0 | Core           | 5.0638  | 0.0000 | Core           | 6.6515 | 0.0000 | Core                  |
| 434 | Human Plasma exp_1 | 13385        | Ig gamma-2 chain C region | EEQFNSTFR_4_3_1_0 | Core           | 6.3169  | 0.0000 | Core           | 6.6022 | 0.0018 | Core                  |
| 435 | Human Plasma exp_2 | 13626        | Ig gamma-2 chain C region | EEQFNSTFR_4_3_1_0 | Core           | 6.0165  | 0.0000 | Core           | 6.6163 | 0.0020 | Core                  |
| 436 | Human Plasma exp_3 | 13544        | Ig gamma-2 chain C region | EEQFNSTFR_4_3_1_0 | Core           | 6.1760  | 0.0000 | Core           | 6.6166 | 0.0000 | Core                  |
| 437 | Human Plasma exp_4 | 13469        | Ig gamma-2 chain C region | EEQFNSTFR_4_3_1_0 | Core           | 6.0051  | 0.0000 | Core           | 6.6198 | 0.0000 | Core                  |
| 438 | Human Plasma exp_5 | 13638        | Ig gamma-2 chain C region | EEQFNSTFR_4_3_1_0 | Core           | 13.5979 | 0.0000 | Core           | 6.6837 | 0.0000 | Core                  |
| 439 | Human Plasma exp_5 | 13457        | Ig gamma-2 chain C region | EEQFNSTFR_4_3_1_0 | Core           | 6.7197  | 0.0000 | Core           | 6.6081 | 0.0019 | Core                  |
| 440 | Human Plasma exp_1 | 17150        | Ig gamma-2 chain C region | EEQFNSTFR_4_3_1_1 | None           | 1.8163  | 0.0000 | Core           | 3.9414 | 0.0091 | Core                  |
| 441 | Human Plasma exp_1 | 16769        | Ig gamma-2 chain C region | EEQFNSTFR_4_3_1_1 | Core           | 2.6239  | 0.0000 | Core           | 6.6388 | 0.0000 | Core                  |
| 442 | Human Plasma exp_2 | 17497        | Ig gamma-2 chain C region | EEQFNSTFR_4_3_1_1 | Core           | 0.6535  | 0.0110 | Core           | 6.6215 | 0.0000 | Core                  |
| 443 | Human Plasma exp_3 | 17150        | Ig gamma-2 chain C region | EEQFNSTFR_4_3_1_1 | Core           | 0.4164  | 0.0506 | Core           | 6.6189 | 0.0000 | Core                  |
| 444 | Human Plasma exp_3 | 17088        | Ig gamma-2 chain C region | EEQFNSTFR_4_3_1_1 | Core           | 5.5236  | 0.0000 | Core           | 6.6335 | 0.0000 | Core                  |
| 445 | Human Plasma exp_4 | 17558        | Ig gamma-2 chain C region | EEQFNSTFR_4_3_1_1 | Core           | 0.5167  | 0.0351 | Core           | 6.6084 | 0.0019 | Core                  |
| 446 | Human Plasma exp_5 | 17204        | Ig gamma-2 chain C region | EEQFNSTFR_4_3_1_1 | Core           | 0.2103  | 0.1541 | Core           | 6.6358 | 0.0000 | Core                  |
| 447 | Human Plasma exp_5 | 16818        | Ig gamma-2 chain C region | EEQFNSTFR_4_3_1_1 | Core           | 4.4763  | 0.0000 | Core           | 6.6335 | 0.0000 | Core                  |
| 448 | Human Plasma exp_1 | 13687        | Ig gamma-2 chain C region | EEQFNSTFR_4_4_1_0 | Core           | 4.6841  | 0.0000 | Core           | 6.6739 | 0.0000 | Core                  |
| 449 | Human Plasma exp_1 | 12634        | Ig gamma-2 chain C region | EEQFNSTFR_4_4_1_0 | Core           | 8.9651  | 0.0000 | Core           | 6.6064 | 0.0019 | Core                  |
| 450 | Human Plasma exp_2 | 13908        | Ig gamma-2 chain C region | EEQFNSTFR_4_4_1_0 | Core           | 5.6975  | 0.0000 | Core           | 6.6624 | 0.0000 | Core                  |

**Supplementary Table 8. Continued.**

| No. | Experiment         | CID Scan No. | N-glycoproteins           | N-glycopeptides   | SVM            |        |        | DNN            |        |        | Manual Classification |
|-----|--------------------|--------------|---------------------------|-------------------|----------------|--------|--------|----------------|--------|--------|-----------------------|
|     |                    |              |                           |                   | Classification | Pscore | FDR    | Classification | Pscore | FDR    |                       |
| 451 | Human Plasma exp_2 | 12874        | Ig gamma-2 chain C region | EEQFNSTFR_4_4_1_0 | Core           | 6.7537 | 0.0000 | Core           | 6.6097 | 0.0019 | Core                  |
| 452 | Human Plasma exp_3 | 13706        | Ig gamma-2 chain C region | EEQFNSTFR_4_4_1_0 | Core           | 4.5580 | 0.0000 | Core           | 6.6352 | 0.0000 | Core                  |
| 453 | Human Plasma exp_4 | 13734        | Ig gamma-2 chain C region | EEQFNSTFR_4_4_1_0 | Core           | 7.1685 | 0.0000 | Core           | 6.6389 | 0.0000 | Core                  |
| 454 | Human Plasma exp_4 | 13504        | Ig gamma-2 chain C region | EEQFNSTFR_4_4_1_0 | Core           | 4.0307 | 0.0000 | Core           | 6.6186 | 0.0000 | Core                  |
| 455 | Human Plasma exp_5 | 13532        | Ig gamma-2 chain C region | EEQFNSTFR_4_4_1_0 | Core           | 7.0027 | 0.0000 | Core           | 6.6408 | 0.0000 | Core                  |
| 456 | Human Plasma exp_5 | 12719        | Ig gamma-2 chain C region | EEQFNSTFR_4_4_1_0 | Core           | 5.3680 | 0.0000 | Core           | 6.5998 | 0.0018 | Core                  |
| 457 | Human Plasma exp_1 | 16956        | Ig gamma-2 chain C region | EEQFNSTFR_4_4_1_1 | Core           | 4.5200 | 0.0000 | Core           | 6.6132 | 0.0020 | Core                  |
| 458 | Human Plasma exp_2 | 17547        | Ig gamma-2 chain C region | EEQFNSTFR_4_4_1_1 | Core           | 1.9544 | 0.0000 | Core           | 6.6423 | 0.0000 | Core                  |
| 459 | Human Plasma exp_2 | 17308        | Ig gamma-2 chain C region | EEQFNSTFR_4_4_1_1 | Core           | 5.9855 | 0.0000 | Core           | 6.6070 | 0.0019 | Core                  |
| 460 | Human Plasma exp_3 | 16967        | Ig gamma-2 chain C region | EEQFNSTFR_4_4_1_1 | Core           | 1.2720 | 0.0000 | Core           | 6.6421 | 0.0000 | Core                  |
| 461 | Human Plasma exp_3 | 16948        | Ig gamma-2 chain C region | EEQFNSTFR_4_4_1_1 | Core           | 4.7128 | 0.0000 | Core           | 6.5954 | 0.0018 | Core                  |
| 462 | Human Plasma exp_4 | 17600        | Ig gamma-2 chain C region | EEQFNSTFR_4_4_1_1 | Core           | 1.8563 | 0.0000 | Core           | 6.6586 | 0.0000 | Core                  |
| 463 | Human Plasma exp_4 | 17369        | Ig gamma-2 chain C region | EEQFNSTFR_4_4_1_1 | Core           | 4.3264 | 0.0000 | Core           | 6.5999 | 0.0018 | Core                  |
| 464 | Human Plasma exp_5 | 17237        | Ig gamma-2 chain C region | EEQFNSTFR_4_4_1_1 | Core           | 1.3790 | 0.0000 | Core           | 6.6643 | 0.0000 | Core                  |
| 465 | Human Plasma exp_5 | 17009        | Ig gamma-2 chain C region | EEQFNSTFR_4_4_1_1 | Core           | 2.5205 | 0.0000 | Core           | 6.6503 | 0.0000 | Core                  |
| 466 | Human Plasma exp_1 | 13534        | Ig gamma-2 chain C region | EEQFNSTFR_4_5_1_0 | Core           | 4.4742 | 0.0000 | Core           | 6.6070 | 0.0019 | Core                  |
| 467 | Human Plasma exp_2 | 13785        | Ig gamma-2 chain C region | EEQFNSTFR_4_5_1_0 | Core           | 5.1598 | 0.0000 | Core           | 6.5954 | 0.0018 | Core                  |
| 468 | Human Plasma exp_3 | 13927        | Ig gamma-2 chain C region | EEQFNSTFR_4_5_1_0 | Core           | 2.9484 | 0.0000 | Core           | 6.6329 | 0.0000 | Core                  |
| 469 | Human Plasma exp_4 | 13820        | Ig gamma-2 chain C region | EEQFNSTFR_4_5_1_0 | Core           | 4.8675 | 0.0000 | Core           | 6.5985 | 0.0018 | Core                  |
| 470 | Human Plasma exp_2 | 17259        | Ig gamma-2 chain C region | EEQFNSTFR_5_3_1_1 | None           | 0.3094 | 0.0770 | Core           | 5.0246 | 0.0031 | Core                  |
| 471 | Human Plasma exp_1 | 13328        | Ig gamma-2 chain C region | EEQFNSTFR_5_4_1_0 | Core           | 3.6278 | 0.0000 | Core           | 6.6133 | 0.0020 | Core                  |
| 472 | Human Plasma exp_3 | 16763        | Ig gamma-2 chain C region | EEQFNSTFR_5_4_1_0 | Core           | 4.6708 | 0.0000 | Core           | 6.6184 | 0.0000 | Core                  |
| 473 | Human Plasma exp_4 | 13629        | Ig gamma-2 chain C region | EEQFNSTFR_5_4_1_0 | Core           | 6.3000 | 0.0000 | Core           | 6.6066 | 0.0019 | Core                  |
| 474 | Human Plasma exp_1 | 16783        | Ig gamma-2 chain C region | EEQFNSTFR_5_4_1_1 | Core           | 1.1225 | 0.0000 | Core           | 6.2242 | 0.0032 | Core                  |
| 475 | Human Plasma exp_1 | 16698        | Ig gamma-2 chain C region | EEQFNSTFR_5_4_1_1 | Core           | 3.3061 | 0.0000 | Core           | 6.6065 | 0.0019 | Core                  |
| 476 | Human Plasma exp_2 | 17088        | Ig gamma-2 chain C region | EEQFNSTFR_5_4_1_1 | Core           | 3.2694 | 0.0000 | Core           | 6.6741 | 0.0000 | Core                  |
| 477 | Human Plasma exp_2 | 17254        | Ig gamma-2 chain C region | EEQFNSTFR_5_4_1_1 | Core           | 3.5326 | 0.0000 | Core           | 6.5920 | 0.0018 | Core                  |
| 478 | Human Plasma exp_3 | 16737        | Ig gamma-2 chain C region | EEQFNSTFR_5_4_1_1 | Core           | 3.7273 | 0.0000 | Core           | 6.6746 | 0.0000 | Core                  |
| 479 | Human Plasma exp_3 | 16686        | Ig gamma-2 chain C region | EEQFNSTFR_5_4_1_1 | Core           | 3.7306 | 0.0000 | Core           | 6.6066 | 0.0019 | Core                  |
| 480 | Human Plasma exp_4 | 17316        | Ig gamma-2 chain C region | EEQFNSTFR_5_4_1_1 | Core           | 2.0361 | 0.0000 | Core           | 6.5920 | 0.0018 | Core                  |

**Supplementary Table 8. Continued.**

| No. | Experiment         | CID Scan No. | N-glycoproteins           | N-glycopeptides   | SVM            |        |        | DNN            |        |        | Manual Classification |
|-----|--------------------|--------------|---------------------------|-------------------|----------------|--------|--------|----------------|--------|--------|-----------------------|
|     |                    |              |                           |                   | Classification | Pscore | FDR    | Classification | Pscore | FDR    |                       |
| 481 | Human Plasma exp_5 | 16770        | Ig gamma-2 chain C region | EEQFNSTFR_5_4_1_1 | Core           | 5.1806 | 0.0000 | Core           | 6.6784 | 0.0000 | Core                  |
| 482 | Human Plasma exp_5 | 16729        | Ig gamma-2 chain C region | EEQFNSTFR_5_4_1_1 | Core           | 3.6012 | 0.0000 | Core           | 6.5930 | 0.0018 | Core                  |
| 483 | Human Plasma exp_5 | 20908        | Ig gamma-2 chain C region | EEQFNSTFR_5_4_1_2 | None           | 0.3124 | 0.0758 | Core           | 6.5782 | 0.0017 | Core                  |
| 484 | Human Plasma exp_4 | 16931        | Ig gamma-2 chain C region | EEQFNSTFR_5_4_2_1 | Dual           | 4.3606 | 0.0000 | Dual           | 6.3007 | 0.0032 | Dual                  |
| 485 | Human Plasma exp_5 | 16592        | Ig gamma-2 chain C region | EEQFNSTFR_5_4_2_1 | Dual           | 3.1942 | 0.0000 | Dual           | 5.8693 | 0.0031 | Dual                  |
| 486 | Human Plasma exp_3 | 13658        | Ig gamma-2 chain C region | EEQFNSTFR_5_5_1_0 | Core           | 3.5743 | 0.0000 | Core           | 6.5922 | 0.0018 | Core                  |
| 487 | Human Plasma exp_1 | 16809        | Ig gamma-2 chain C region | EEQFNSTFR_6_3_1_1 | Core           | 2.1606 | 0.0000 | Core           | 6.6419 | 0.0000 | Core                  |
| 488 | Human Plasma exp_4 | 17195        | Ig gamma-2 chain C region | EEQFNSTFR_6_3_1_1 | None           | 0.8976 | 0.0000 | Core           | 6.6071 | 0.0019 | Core                  |
| 489 | Human Plasma exp_5 | 16894        | Ig gamma-2 chain C region | EEQFNSTFR_6_3_1_1 | Core           | 3.0612 | 0.0000 | Core           | 6.6362 | 0.0000 | Core                  |
| 490 | Human Plasma exp_1 | 10127        | Ig gamma-3 chain C region | EEQYNSTFR_3_4_1_0 | Core           | 8.4747 | 0.0000 | Core           | 6.6135 | 0.0020 | Core                  |
| 491 | Human Plasma exp_3 | 9906         | Ig gamma-3 chain C region | EEQYNSTFR_3_4_1_0 | Core           | 7.8947 | 0.0000 | Core           | 6.6200 | 0.0000 | Core                  |
| 492 | Human Plasma exp_4 | 10030        | Ig gamma-3 chain C region | EEQYNSTFR_3_4_1_0 | Core           | 7.6343 | 0.0000 | Core           | 6.6250 | 0.0000 | Core                  |
| 493 | Human Plasma exp_5 | 10292        | Ig gamma-3 chain C region | EEQYNSTFR_3_4_1_0 | Core           | 4.7886 | 0.0000 | Core           | 6.6087 | 0.0019 | Core                  |
| 494 | Human Plasma exp_1 | 9543         | Ig gamma-3 chain C region | EEQYNSTFR_4_3_1_0 | Core           | 5.8376 | 0.0000 | Core           | 6.6179 | 0.0000 | Core                  |
| 495 | Human Plasma exp_3 | 9595         | Ig gamma-3 chain C region | EEQYNSTFR_4_3_1_0 | Core           | 6.6713 | 0.0000 | Core           | 6.6113 | 0.0019 | Core                  |
| 496 | Human Plasma exp_5 | 9665         | Ig gamma-3 chain C region | EEQYNSTFR_4_3_1_0 | Core           | 6.4945 | 0.0000 | Core           | 6.6217 | 0.0000 | Core                  |
| 497 | Human Plasma exp_1 | 9505         | Ig gamma-3 chain C region | EEQYNSTFR_5_4_1_0 | Core           | 4.1667 | 0.0000 | Core           | 6.6082 | 0.0019 | Core                  |
| 498 | Human Plasma exp_2 | 9825         | Ig gamma-3 chain C region | EEQYNSTFR_5_4_1_0 | Core           | 4.6673 | 0.0000 | Core           | 6.6021 | 0.0018 | Core                  |
| 499 | Human Plasma exp_3 | 9490         | Ig gamma-3 chain C region | EEQYNSTFR_5_4_1_0 | Core           | 5.0442 | 0.0000 | Core           | 6.5920 | 0.0017 | Core                  |
| 500 | Human Plasma exp_5 | 9610         | Ig gamma-3 chain C region | EEQYNSTFR_5_4_1_0 | Core           | 3.2460 | 0.0000 | Core           | 6.6018 | 0.0018 | Core                  |
| 501 | Human Plasma exp_1 | 12957        | Ig gamma-3 chain C region | EEQYNSTFR_5_4_1_1 | Core           | 5.5918 | 0.0000 | Core           | 6.6081 | 0.0019 | Core                  |
| 502 | Human Plasma exp_2 | 13111        | Ig gamma-3 chain C region | EEQYNSTFR_5_4_1_1 | Core           | 5.0474 | 0.0000 | Core           | 6.6796 | 0.0000 | Core                  |
| 503 | Human Plasma exp_2 | 12990        | Ig gamma-3 chain C region | EEQYNSTFR_5_4_1_1 | Core           | 4.3601 | 0.0000 | Core           | 6.6071 | 0.0019 | Core                  |
| 504 | Human Plasma exp_3 | 12972        | Ig gamma-3 chain C region | EEQYNSTFR_5_4_1_1 | Core           | 3.7825 | 0.0000 | Core           | 6.6895 | 0.0000 | Core                  |
| 505 | Human Plasma exp_4 | 13137        | Ig gamma-3 chain C region | EEQYNSTFR_5_4_1_1 | Core           | 5.6060 | 0.0000 | Core           | 6.6780 | 0.0000 | Core                  |
| 506 | Human Plasma exp_5 | 12944        | Ig gamma-3 chain C region | EEQYNSTFR_5_4_1_1 | Core           | 4.3100 | 0.0000 | Core           | 6.6860 | 0.0000 | Core                  |
| 507 | Human Plasma exp_4 | 16943        | Ig gamma-3 chain C region | EEQYNSTFR_5_4_1_2 | None           | 0.3417 | 0.0652 | Core           | 5.6595 | 0.0031 | Core                  |
| 508 | Human Plasma exp_5 | 16636        | Ig gamma-3 chain C region | EEQYNSTFR_5_4_1_2 | None           | 0.5090 | 0.0351 | Core           | 6.2862 | 0.0032 | Core                  |
| 509 | Human Plasma exp_1 | 9753         | Ig gamma-4 chain C region | EEQFNSTYR_3_3_1_0 | Core           | 6.0099 | 0.0000 | Core           | 6.6458 | 0.0000 | Core                  |
| 510 | Human Plasma exp_2 | 9935         | Ig gamma-4 chain C region | EEQFNSTYR_3_3_1_0 | Core           | 8.4231 | 0.0000 | Core           | 6.6235 | 0.0000 | Core                  |



**Supplementary Table 8. Continued.**

| No. | Experiment         | CID Scan No. | N-glycoproteins           | N-glycopeptides              | SVM            |         |        | DNN            |        |        | Manual Classification |
|-----|--------------------|--------------|---------------------------|------------------------------|----------------|---------|--------|----------------|--------|--------|-----------------------|
|     |                    |              |                           |                              | Classification | Pscore  | FDR    | Classification | Pscore | FDR    |                       |
| 511 | Human Plasma exp_3 | 9928         | Ig gamma-4 chain C region | EEQFNSTYR_3_3_1_0            | Core           | 9.2761  | 0.0000 | Core           | 6.6130 | 0.0020 | Core                  |
| 512 | Human Plasma exp_4 | 9975         | Ig gamma-4 chain C region | EEQFNSTYR_3_3_1_0            | Core           | 7.8092  | 0.0000 | Core           | 6.6252 | 0.0000 | Core                  |
| 513 | Human Plasma exp_5 | 9897         | Ig gamma-4 chain C region | EEQFNSTYR_3_3_1_0            | Core           | 7.4211  | 0.0000 | Core           | 6.6218 | 0.0000 | Core                  |
| 514 | Human Plasma exp_1 | 9787         | Ig gamma-4 chain C region | EEQFNSTYR_3_4_1_0            | Core           | 7.3600  | 0.0000 | Core           | 6.6303 | 0.0000 | Core                  |
| 515 | Human Plasma exp_2 | 9981         | Ig gamma-4 chain C region | EEQFNSTYR_3_4_1_0            | Core           | 7.7668  | 0.0000 | Core           | 6.6318 | 0.0000 | Core                  |
| 516 | Human Plasma exp_3 | 10070        | Ig gamma-4 chain C region | EEQFNSTYR_3_4_1_0            | Core           | 6.8669  | 0.0000 | Core           | 6.6375 | 0.0000 | Core                  |
| 517 | Human Plasma exp_4 | 10210        | Ig gamma-4 chain C region | EEQFNSTYR_3_4_1_0            | Core           | 7.2553  | 0.0000 | Core           | 6.6249 | 0.0000 | Core                  |
| 518 | Human Plasma exp_5 | 10108        | Ig gamma-4 chain C region | EEQFNSTYR_3_4_1_0            | Core           | 6.5452  | 0.0000 | Core           | 6.6354 | 0.0000 | Core                  |
| 519 | Human Plasma exp_1 | 10485        | Ig gamma-4 chain C region | EEQFNSTYR_3_5_1_0            | Core           | 4.5552  | 0.0000 | Core           | 6.6306 | 0.0000 | Core                  |
| 520 | Human Plasma exp_2 | 10657        | Ig gamma-4 chain C region | EEQFNSTYR_3_5_1_0            | Core           | 6.3047  | 0.0000 | Core           | 6.6080 | 0.0019 | Core                  |
| 521 | Human Plasma exp_3 | 10465        | Ig gamma-4 chain C region | EEQFNSTYR_3_5_1_0            | Core           | 2.9527  | 0.0000 | Core           | 6.6069 | 0.0019 | Core                  |
| 522 | Human Plasma exp_4 | 10746        | Ig gamma-4 chain C region | EEQFNSTYR_3_5_1_0            | Core           | 4.3696  | 0.0000 | Core           | 6.6271 | 0.0000 | Core                  |
| 523 | Human Plasma exp_5 | 10601        | Ig gamma-4 chain C region | EEQFNSTYR_3_5_1_0            | Core           | 4.7886  | 0.0000 | Core           | 6.6239 | 0.0000 | Core                  |
| 524 | Human Plasma exp_2 | 9717         | Ig gamma-4 chain C region | EEQFNSTYR_4_3_1_0            | Core           | 7.8329  | 0.0000 | Core           | 6.6065 | 0.0019 | Core                  |
| 525 | Human Plasma exp_3 | 9741         | Ig gamma-4 chain C region | EEQFNSTYR_4_3_1_0            | Core           | 6.5584  | 0.0000 | Core           | 6.6131 | 0.0020 | Core                  |
| 526 | Human Plasma exp_4 | 9922         | Ig gamma-4 chain C region | EEQFNSTYR_4_3_1_0            | Core           | 7.1598  | 0.0000 | Core           | 6.5981 | 0.0018 | Core                  |
| 527 | Human Plasma exp_1 | 9840         | Ig gamma-4 chain C region | EEQFNSTYR_4_4_1_0            | Core           | 5.9481  | 0.0000 | Core           | 6.6603 | 0.0000 | Core                  |
| 528 | Human Plasma exp_2 | 10037        | Ig gamma-4 chain C region | EEQFNSTYR_4_4_1_0            | Core           | 6.3414  | 0.0000 | Core           | 6.6536 | 0.0000 | Core                  |
| 529 | Human Plasma exp_2 | 10245        | Ig gamma-4 chain C region | EEQFNSTYR_4_4_1_0            | Core           | 4.7664  | 0.0000 | Core           | 6.6129 | 0.0020 | Core                  |
| 530 | Human Plasma exp_5 | 9987         | Ig gamma-4 chain C region | EEQFNSTYR_4_4_1_0            | Core           | 6.3592  | 0.0000 | Core           | 6.6535 | 0.0000 | Core                  |
| 531 | Human Plasma exp_5 | 10006        | Ig gamma-4 chain C region | EEQFNSTYR_4_4_1_0            | Core           | 6.2104  | 0.0000 | Core           | 6.6237 | 0.0000 | Core                  |
| 532 | Human Plasma exp_1 | 12976        | Ig gamma-4 chain C region | EEQFNSTYR_4_4_1_1            | Dual           | 0.0183  | 0.4394 | Core           | 6.1199 | 0.0032 | Core                  |
| 533 | Human Plasma exp_1 | 13030        | Ig gamma-4 chain C region | EEQFNSTYR_4_4_1_1            | Core           | 3.2510  | 0.0000 | Core           | 6.6132 | 0.0020 | Core                  |
| 534 | Human Plasma exp_2 | 13233        | Ig gamma-4 chain C region | EEQFNSTYR_4_4_1_1            | Core           | 0.1700  | 0.2044 | Core           | 6.3913 | 0.0033 | Core                  |
| 535 | Human Plasma exp_3 | 13138        | Ig gamma-4 chain C region | EEQFNSTYR_4_4_1_1            | Core           | 0.3498  | 0.0599 | Core           | 6.5442 | 0.0017 | Core                  |
| 536 | Human Plasma exp_4 | 13288        | Ig gamma-4 chain C region | EEQFNSTYR_4_4_1_1            | Core           | 0.5918  | 0.0202 | Core           | 6.6036 | 0.0018 | Core                  |
| 537 | Human Plasma exp_5 | 13088        | Ig gamma-4 chain C region | EEQFNSTYR_4_4_1_1            | Core           | 0.6181  | 0.0172 | Core           | 6.6383 | 0.0000 | Core                  |
| 538 | Human Plasma exp_2 | 10542        | Ig gamma-4 chain C region | EEQFNSTYR_4_5_1_0            | Core           | 4.0764  | 0.0000 | Core           | 6.5866 | 0.0017 | Core                  |
| 539 | Human Plasma exp_3 | 9633         | Ig gamma-4 chain C region | EEQFNSTYR_5_4_1_0            | Core           | 3.3659  | 0.0000 | Core           | 6.6032 | 0.0018 | Core                  |
| 540 | Human Plasma exp_2 | 26482        | Ig mu chain C region      | GLTFQQNASSMCVPDQDAIR_5_4_1_1 | Core           | 13.7754 | 0.0000 | Core           | 6.5742 | 0.0017 | Core                  |

Supplementary Table 8. Continued.

| No. | Experiment         | CID Scan No. | N-glycoproteins        | N-glycopeptides     | SVM            |         |        | DNN            |        |        | Manual Classification |
|-----|--------------------|--------------|------------------------|---------------------|----------------|---------|--------|----------------|--------|--------|-----------------------|
|     |                    |              |                        |                     | Classification | Pscore  | FDR    | Classification | Pscore | FDR    |                       |
| 541 | Human Plasma exp_1 | 2772         | Ig mu chain C region   | NNSDISSTR_4_3_0_1   | None           | 3.4908  | 0.0000 | None           | 7.3423 | 0.0000 | None                  |
| 542 | Human Plasma exp_2 | 2942         | Ig mu chain C region   | NNSDISSTR_4_3_0_1   | None           | 4.2925  | 0.0000 | None           | 7.3530 | 0.0000 | None                  |
| 543 | Human Plasma exp_3 | 2842         | Ig mu chain C region   | NNSDISSTR_4_3_0_1   | None           | 4.4543  | 0.0000 | None           | 7.3405 | 0.0000 | None                  |
| 544 | Human Plasma exp_4 | 2928         | Ig mu chain C region   | NNSDISSTR_4_3_0_1   | None           | 4.2013  | 0.0000 | None           | 7.3185 | 0.0000 | None                  |
| 545 | Human Plasma exp_5 | 2834         | Ig mu chain C region   | NNSDISSTR_4_3_0_1   | None           | 3.8757  | 0.0000 | None           | 7.3264 | 0.0000 | None                  |
| 546 | Human Plasma exp_1 | 3001         | Ig mu chain C region   | NNSDISSTR_4_3_1_1   | Core           | 13.4360 | 0.0000 | Core           | 6.5714 | 0.0017 | Core                  |
| 547 | Human Plasma exp_1 | 2681         | Ig mu chain C region   | NNSDISSTR_5_3_0_1   | None           | 4.9312  | 0.0000 | None           | 7.3220 | 0.0000 | None                  |
| 548 | Human Plasma exp_2 | 2834         | Ig mu chain C region   | NNSDISSTR_5_3_0_1   | None           | 4.7134  | 0.0000 | None           | 7.3460 | 0.0000 | None                  |
| 549 | Human Plasma exp_3 | 2746         | Ig mu chain C region   | NNSDISSTR_5_3_0_1   | None           | 4.7942  | 0.0000 | None           | 7.3476 | 0.0000 | None                  |
| 550 | Human Plasma exp_4 | 2838         | Ig mu chain C region   | NNSDISSTR_5_3_0_1   | None           | 4.3101  | 0.0000 | None           | 7.3457 | 0.0000 | None                  |
| 551 | Human Plasma exp_5 | 2750         | Ig mu chain C region   | NNSDISSTR_5_3_0_1   | None           | 4.8750  | 0.0000 | None           | 7.3441 | 0.0000 | None                  |
| 552 | Human Plasma exp_4 | 3061         | Ig mu chain C region   | NNSDISSTR_5_3_1_1   | Core           | 4.8327  | 0.0000 | Core           | 6.6260 | 0.0000 | Core                  |
| 553 | Human Plasma exp_2 | 3007         | Ig mu chain C region   | NNSDISSTR_5_4_0_1   | None           | 3.2789  | 0.0000 | None           | 7.3278 | 0.0000 | None                  |
| 554 | Human Plasma exp_2 | 3177         | Ig mu chain C region   | NNSDISSTR_5_4_1_1   | Core           | 0.0358  | 0.4011 | Core           | 3.4152 | 0.0090 | Core                  |
| 555 | Human Plasma exp_2 | 3207         | Ig mu chain C region   | NNSDISSTR_5_4_1_1   | Core           | 4.0804  | 0.0000 | Core           | 6.5884 | 0.0017 | Core                  |
| 556 | Human Plasma exp_5 | 5962         | Ig mu chain C region   | NNSDISSTR_5_4_1_2   | None           | 0.4298  | 0.0451 | None           | 1.2319 | 0.0291 | Core                  |
| 557 | Human Plasma exp_4 | 3362         | Ig mu chain C region   | NNSDISSTR_5_5_0_1   | None           | 1.5317  | 0.0000 | None           | 7.2869 | 0.0000 | None                  |
| 558 | Human Plasma exp_5 | 3507         | Ig mu chain C region   | NNSDISSTR_5_5_1_1   | Core           | 3.4116  | 0.0000 | Core           | 6.6223 | 0.0000 | Core                  |
| 559 | Human Plasma exp_1 | 2571         | Ig mu chain C region   | NNSDISSTR_6_3_0_1   | None           | 3.4304  | 0.0000 | None           | 7.2828 | 0.0000 | None                  |
| 560 | Human Plasma exp_2 | 2777         | Ig mu chain C region   | NNSDISSTR_6_3_0_1   | None           | 2.4112  | 0.0000 | None           | 7.2906 | 0.0000 | None                  |
| 561 | Human Plasma exp_3 | 3033         | Ig mu chain C region   | NNSDISSTR_6_3_1_1   | Core           | 3.7292  | 0.0000 | Core           | 6.6263 | 0.0000 | Core                  |
| 562 | Human Plasma exp_4 | 3113         | Ig mu chain C region   | NNSDISSTR_6_3_1_1   | Core           | 4.3286  | 0.0000 | Core           | 6.6198 | 0.0000 | Core                  |
| 563 | Human Plasma exp_1 | 19134        | Immunoglobulin J chain | ENISDPTSPLR_5_3_1_1 | Core           | 4.3286  | 0.0000 | Core           | 6.5838 | 0.0017 | Core                  |
| 564 | Human Plasma exp_3 | 18908        | Immunoglobulin J chain | ENISDPTSPLR_5_3_1_1 | Core           | 7.5450  | 0.0000 | Core           | 6.5698 | 0.0017 | Core                  |
| 565 | Human Plasma exp_4 | 19585        | Immunoglobulin J chain | ENISDPTSPLR_5_3_1_1 | Core           | 4.5194  | 0.0000 | Core           | 6.6243 | 0.0000 | Core                  |
| 566 | Human Plasma exp_5 | 19137        | Immunoglobulin J chain | ENISDPTSPLR_5_3_1_1 | Core           | 3.7508  | 0.0000 | Core           | 6.6637 | 0.0000 | Core                  |
| 567 | Human Plasma exp_2 | 19127        | Immunoglobulin J chain | ENISDPTSPLR_5_4_0_1 | None           | 4.0765  | 0.0000 | None           | 7.3081 | 0.0000 | None                  |
| 568 | Human Plasma exp_1 | 22460        | Immunoglobulin J chain | ENISDPTSPLR_5_4_0_2 | None           | 4.2345  | 0.0000 | None           | 7.3386 | 0.0000 | None                  |
| 569 | Human Plasma exp_1 | 22442        | Immunoglobulin J chain | ENISDPTSPLR_5_4_0_2 | None           | 2.6698  | 0.0000 | None           | 7.1184 | 0.0000 | None                  |
| 570 | Human Plasma exp_2 | 22909        | Immunoglobulin J chain | ENISDPTSPLR_5_4_0_2 | None           | 3.2914  | 0.0000 | None           | 7.3375 | 0.0000 | None                  |

**Supplementary Table 8. Continued.**

| No. | Experiment         | CID Scan No. | N-glycoproteins                                                        | N-glycopeptides        | SVM            |        |        | DNN            |        |        | Manual Classification |
|-----|--------------------|--------------|------------------------------------------------------------------------|------------------------|----------------|--------|--------|----------------|--------|--------|-----------------------|
|     |                    |              |                                                                        |                        | Classification | Pscore | FDR    | Classification | Pscore | FDR    |                       |
| 571 | Human Plasma exp_2 | 22784        | Immunoglobulin J chain                                                 | ENISDPTSPLR_5_4_0_2    | None           | 3.1929 | 0.0000 | None           | 7.2658 | 0.0000 | None                  |
| 572 | Human Plasma exp_3 | 22200        | Immunoglobulin J chain                                                 | ENISDPTSPLR_5_4_0_2    | None           | 4.1926 | 0.0000 | None           | 7.3363 | 0.0000 | None                  |
| 573 | Human Plasma exp_4 | 22776        | Immunoglobulin J chain                                                 | ENISDPTSPLR_5_4_0_2    | None           | 3.7719 | 0.0000 | None           | 7.3260 | 0.0000 | None                  |
| 574 | Human Plasma exp_2 | 15804        | Insulin-like growth factor-binding protein 3                           | GLCVNASAVSR_5_4_0_2    | None           | 2.8293 | 0.0000 | None           | 7.2672 | 0.0000 | None                  |
| 575 | Human Plasma exp_3 | 15524        | Insulin-like growth factor-binding protein 3                           | GLCVNASAVSR_5_4_0_2    | None           | 2.1626 | 0.0000 | None           | 7.2766 | 0.0000 | None                  |
| 576 | Human Plasma exp_2 | 3512         | Insulin-like growth factor-binding protein complex acid labile subunit | NNSLR_4_3_0_1          | None           | 4.4783 | 0.0000 | None           | 7.3596 | 0.0000 | None                  |
| 577 | Human Plasma exp_1 | 3342         | Insulin-like growth factor-binding protein complex acid labile subunit | NNSLR_5_4_0_2          | None           | 2.5670 | 0.0000 | None           | 7.2784 | 0.0000 | None                  |
| 578 | Human Plasma exp_2 | 3432         | Insulin-like growth factor-binding protein complex acid labile subunit | NNSLR_5_4_0_2          | None           | 2.5059 | 0.0000 | None           | 7.2838 | 0.0000 | None                  |
| 579 | Human Plasma exp_3 | 3351         | Insulin-like growth factor-binding protein complex acid labile subunit | NNSLR_5_4_0_2          | None           | 2.9909 | 0.0000 | None           | 7.2786 | 0.0000 | None                  |
| 580 | Human Plasma exp_4 | 3663         | Insulin-like growth factor-binding protein complex acid labile subunit | NNSLR_5_4_0_2          | None           | 2.4086 | 0.0000 | None           | 7.2654 | 0.0000 | None                  |
| 581 | Human Plasma exp_5 | 3367         | Insulin-like growth factor-binding protein complex acid labile subunit | NNSLR_5_4_0_2          | None           | 3.4008 | 0.0000 | None           | 7.2933 | 0.0000 | None                  |
| 582 | Human Plasma exp_2 | 8788         | Inter-alpha-trypsin inhibitor heavy chain H3                           | ENLTAR_5_4_0_2         | None           | 1.6195 | 0.0000 | None           | 7.2561 | 0.0000 | None                  |
| 583 | Human Plasma exp_1 | 13583        | Inter-alpha-trypsin inhibitor heavy chain H3                           | ENLTAR_6_5_0_3         | None           | 1.7366 | 0.0000 | None           | 7.2567 | 0.0000 | None                  |
| 584 | Human Plasma exp_3 | 13750        | Inter-alpha-trypsin inhibitor heavy chain H3                           | ENLTAR_6_5_0_3         | None           | 2.3873 | 0.0000 | None           | 7.2504 | 0.0000 | None                  |
| 585 | Human Plasma exp_4 | 13946        | Inter-alpha-trypsin inhibitor heavy chain H3                           | ENLTAR_6_5_0_3         | None           | 2.4775 | 0.0000 | None           | 7.2855 | 0.0000 | None                  |
| 586 | Human Plasma exp_1 | 22574        | Kininogen-1                                                            | ITYSIVQTNCCK_5_4_0_2   | None           | 2.8799 | 0.0000 | None           | 7.2908 | 0.0000 | None                  |
| 587 | Human Plasma exp_2 | 22988        | Kininogen-1                                                            | ITYSIVQTNCCK_5_4_0_2   | None           | 3.8698 | 0.0000 | None           | 7.3166 | 0.0000 | None                  |
| 588 | Human Plasma exp_3 | 22407        | Kininogen-1                                                            | ITYSIVQTNCCK_5_4_0_2   | None           | 3.8098 | 0.0000 | None           | 7.3247 | 0.0000 | None                  |
| 589 | Human Plasma exp_4 | 22942        | Kininogen-1                                                            | ITYSIVQTNCCK_5_4_0_2   | None           | 3.9370 | 0.0000 | None           | 7.3183 | 0.0000 | None                  |
| 590 | Human Plasma exp_5 | 22388        | Kininogen-1                                                            | ITYSIVQTNCCK_5_4_0_2   | None           | 3.2379 | 0.0000 | None           | 7.2974 | 0.0000 | None                  |
| 591 | Human Plasma exp_1 | 22471        | Kininogen-1                                                            | ITYSIVQTNCCK_5_4_1_2   | None           | 1.8137 | 0.0000 | None           | 6.9649 | 0.0000 | Core                  |
| 592 | Human Plasma exp_2 | 26235        | Kininogen-1                                                            | ITYSIVQTNCCK_6_5_1_3   | Outer          | 3.1875 | 0.0000 | Outer          | 6.6558 | 0.0000 | Outer                 |
| 593 | Human Plasma exp_4 | 26128        | Kininogen-1                                                            | ITYSIVQTNCCK_6_5_1_3   | Outer          | 2.2362 | 0.0000 | Outer          | 6.6095 | 0.0019 | Outer                 |
| 594 | Human Plasma exp_5 | 25355        | Kininogen-1                                                            | ITYSIVQTNCCK_6_5_1_3   | Outer          | 2.9445 | 0.0000 | Outer          | 6.6014 | 0.0018 | Outer                 |
| 595 | Human Plasma exp_3 | 26586        | Kininogen-1                                                            | LNAENNATFYFK_5_4_0_2   | None           | 4.3082 | 0.0000 | None           | 7.3276 | 0.0000 | None                  |
| 596 | Human Plasma exp_3 | 29339        | Kininogen-1                                                            | LNAENNATFYFK_6_5_1_3   | Outer          | 0.4257 | 0.0479 | Outer          | 3.0904 | 0.0135 | Outer                 |
| 597 | Human Plasma exp_2 | 25878        | Kininogen-1                                                            | YNSQNSNNQFVLYR_5_4_0_2 | None           | 2.9909 | 0.0000 | None           | 7.3209 | 0.0000 | None                  |
| 598 | Human Plasma exp_4 | 25851        | Kininogen-1                                                            | YNSQNSNNQFVLYR_5_4_0_2 | None           | 3.5936 | 0.0000 | None           | 7.3364 | 0.0000 | None                  |
| 599 | Human Plasma exp_5 | 25165        | Kininogen-1                                                            | YNSQNSNNQFVLYR_5_4_0_2 | None           | 2.8651 | 0.0000 | None           | 7.3159 | 0.0000 | None                  |

**Supplementary Table 8. Continued.**

| No. | Experiment         | CID Scan No. | N-glycoproteins                            | N-glycopeptides      | SVM            |        |        | DNN            |        |        | Manual Classification |
|-----|--------------------|--------------|--------------------------------------------|----------------------|----------------|--------|--------|----------------|--------|--------|-----------------------|
|     |                    |              |                                            |                      | Classification | Pscore | FDR    | Classification | Pscore | FDR    |                       |
| 600 | Human Plasma exp_4 | 25837        | L-selectin                                 | DNYTDLVAIQNK_5_4_0_2 | None           | 2.6932 | 0.0000 | None           | 7.1606 | 0.0000 | None                  |
| 601 | Human Plasma exp_1 | 12687        | Phosphatidylcholine-sterol acyltransferase | VVYNR_6_5_0_3        | None           | 2.4783 | 0.0000 | None           | 7.2607 | 0.0000 | None                  |
| 602 | Human Plasma exp_2 | 12915        | Phosphatidylcholine-sterol acyltransferase | VVYNR_6_5_0_3        | None           | 1.6152 | 0.0000 | None           | 7.2464 | 0.0000 | None                  |
| 603 | Human Plasma exp_4 | 12966        | Phosphatidylcholine-sterol acyltransferase | VVYNR_6_5_0_3        | None           | 1.6391 | 0.0000 | None           | 7.2510 | 0.0000 | None                  |
| 604 | Human Plasma exp_5 | 12785        | Phosphatidylcholine-sterol acyltransferase | VVYNR_6_5_0_3        | None           | 1.8889 | 0.0000 | None           | 7.2682 | 0.0000 | Core                  |
| 605 | Human Plasma exp_1 | 23404        | Phospholipid transfer protein              | NWSLPNR_5_4_1_2      | None           | 1.4838 | 0.0000 | Core           | 2.2533 | 0.0178 | Core                  |
| 606 | Human Plasma exp_5 | 23324        | Phospholipid transfer protein              | NWSLPNR_5_4_1_2      | Core           | 1.8892 | 0.0000 | Core           | 6.6405 | 0.0000 | None                  |
| 607 | Human Plasma exp_2 | 20184        | Plasma kallikrein                          | GVNFNVSK_5_4_0_2     | None           | 3.2067 | 0.0000 | None           | 7.2899 | 0.0000 | None                  |
| 608 | Human Plasma exp_5 | 19816        | Plasma kallikrein                          | GVNFNVSK_5_4_0_2     | None           | 2.8883 | 0.0000 | None           | 7.2793 | 0.0000 | None                  |
| 609 | Human Plasma exp_1 | 4851         | Plasma serine protease inhibitor           | NLSCR_5_4_0_2        | None           | 1.9411 | 0.0000 | None           | 7.2768 | 0.0000 | None                  |
| 610 | Human Plasma exp_2 | 4939         | Plasma serine protease inhibitor           | NLSCR_5_4_0_2        | None           | 3.0582 | 0.0000 | None           | 7.2839 | 0.0000 | None                  |
| 611 | Human Plasma exp_4 | 5038         | Plasma serine protease inhibitor           | NLSCR_5_4_0_2        | None           | 2.7445 | 0.0000 | None           | 7.2840 | 0.0000 | None                  |
| 612 | Human Plasma exp_5 | 4877         | Plasma serine protease inhibitor           | NLSCR_5_4_0_2        | None           | 2.5400 | 0.0000 | None           | 7.2744 | 0.0000 | None                  |
| 613 | Human Plasma exp_3 | 5241         | Prothrombin                                | GHVNITR_4_3_0_1      | None           | 3.6308 | 0.0000 | None           | 7.3439 | 0.0000 | None                  |
| 614 | Human Plasma exp_4 | 5405         | Prothrombin                                | GHVNITR_4_3_0_1      | None           | 4.0221 | 0.0000 | None           | 7.3744 | 0.0000 | None                  |
| 615 | Human Plasma exp_5 | 5223         | Prothrombin                                | GHVNITR_4_3_0_1      | None           | 3.6401 | 0.0000 | None           | 7.3589 | 0.0000 | Outer                 |
| 616 | Human Plasma exp_1 | 5324         | Prothrombin                                | GHVNITR_5_4_1_2      | Outer          | 1.4871 | 0.0000 | Outer          | 6.6284 | 0.0000 | Outer                 |
| 617 | Human Plasma exp_4 | 5480         | Prothrombin                                | GHVNITR_5_4_1_2      | Outer          | 1.9911 | 0.0000 | Outer          | 6.7178 | 0.0000 | None                  |
| 618 | Human Plasma exp_2 | 27844        | Prothrombin                                | NFTENDLLVR_5_4_0_2   | None           | 3.3435 | 0.0000 | None           | 7.2945 | 0.0000 | None                  |
| 619 | Human Plasma exp_2 | 27820        | Prothrombin                                | NFTENDLLVR_5_4_0_2   | None           | 2.5963 | 0.0000 | None           | 7.2613 | 0.0000 | None                  |
| 620 | Human Plasma exp_3 | 27242        | Prothrombin                                | NFTENDLLVR_5_4_0_2   | None           | 3.7428 | 0.0000 | None           | 7.3136 | 0.0000 | None                  |
| 621 | Human Plasma exp_3 | 27228        | Prothrombin                                | NFTENDLLVR_5_4_0_2   | None           | 2.0922 | 0.0000 | None           | 7.2763 | 0.0000 | None                  |
| 622 | Human Plasma exp_4 | 27606        | Prothrombin                                | NFTENDLLVR_5_4_0_2   | None           | 2.5762 | 0.0000 | None           | 7.3128 | 0.0000 | None                  |
| 623 | Human Plasma exp_1 | 28401        | Serotransferrin                            | CGLVPVLAENYK_4_3_0_1 | None           | 3.5444 | 0.0000 | None           | 7.3396 | 0.0000 | None                  |
| 624 | Human Plasma exp_2 | 29120        | Serotransferrin                            | CGLVPVLAENYK_4_3_0_1 | None           | 4.0713 | 0.0000 | None           | 7.3507 | 0.0000 | None                  |
| 625 | Human Plasma exp_3 | 28600        | Serotransferrin                            | CGLVPVLAENYK_4_3_0_1 | None           | 4.8354 | 0.0000 | None           | 7.3531 | 0.0000 | None                  |
| 626 | Human Plasma exp_4 | 28899        | Serotransferrin                            | CGLVPVLAENYK_4_3_0_1 | None           | 4.5369 | 0.0000 | None           | 7.3598 | 0.0000 | None                  |
| 627 | Human Plasma exp_5 | 28083        | Serotransferrin                            | CGLVPVLAENYK_4_3_0_1 | None           | 4.5316 | 0.0000 | None           | 7.3399 | 0.0000 | None                  |
| 628 | Human Plasma exp_4 | 26451        | Serotransferrin                            | CGLVPVLAENYK_5_4_0_1 | None           | 3.2585 | 0.0000 | None           | 7.3400 | 0.0000 | None                  |
| 629 | Human Plasma exp_1 | 28364        | Serotransferrin                            | CGLVPVLAENYK_5_4_0_2 | None           | 3.5721 | 0.0000 | None           | 7.3129 | 0.0000 | None                  |

**Supplementary Table 8. Continued.**

| No. | Experiment         | CID Scan No. | N-glycoproteins               | N-glycopeptides          | SVM            |        |        | DNN            |        |        | Manual Classification |
|-----|--------------------|--------------|-------------------------------|--------------------------|----------------|--------|--------|----------------|--------|--------|-----------------------|
|     |                    |              |                               |                          | Classification | Pscore | FDR    | Classification | Pscore | FDR    |                       |
| 630 | Human Plasma exp_2 | 29354        | Serotransferrin               | CGLVPVLAENYNK_5_4_0_2    | None           | 2.5703 | 0.0000 | None           | 7.3122 | 0.0000 | None                  |
| 631 | Human Plasma exp_3 | 28548        | Serotransferrin               | CGLVPVLAENYNK_5_4_0_2    | None           | 2.6902 | 0.0000 | None           | 7.3142 | 0.0000 | None                  |
| 632 | Human Plasma exp_4 | 29121        | Serotransferrin               | CGLVPVLAENYNK_5_4_0_2    | None           | 5.2484 | 0.0000 | None           | 7.3515 | 0.0000 | None                  |
| 633 | Human Plasma exp_5 | 28179        | Serotransferrin               | CGLVPVLAENYNK_5_4_0_2    | None           | 3.9919 | 0.0000 | None           | 7.3309 | 0.0000 | None                  |
| 634 | Human Plasma exp_3 | 23286        | Sex hormone-binding globulin  | LDVDQALNR_5_4_0_2        | None           | 3.5697 | 0.0000 | None           | 7.2500 | 0.0000 | None                  |
| 635 | Human Plasma exp_4 | 13511        | Thyroxine-binding globulin    | VTACHSSQP NATLYK_5_4_0_2 | None           | 3.1572 | 0.0000 | None           | 7.3381 | 0.0000 | None                  |
| 636 | Human Plasma exp_1 | 17101        | Vitamin K-dependent protein C | EVFVHPNYSK_5_4_0_2       | None           | 2.6825 | 0.0000 | None           | 7.3180 | 0.0000 | None                  |
| 637 | Human Plasma exp_2 | 17448        | Vitamin K-dependent protein C | EVFVHPNYSK_5_4_0_2       | None           | 2.7484 | 0.0000 | None           | 7.3264 | 0.0000 | None                  |
| 638 | Human Plasma exp_1 | 24845        | Vitronectin                   | NGSLFAFR_4_3_0_1         | None           | 2.5421 | 0.0000 | None           | 7.3370 | 0.0000 | None                  |
| 639 | Human Plasma exp_2 | 25338        | Vitronectin                   | NGSLFAFR_4_3_0_1         | None           | 1.9818 | 0.0000 | None           | 7.3264 | 0.0000 | None                  |
| 640 | Human Plasma exp_3 | 24827        | Vitronectin                   | NGSLFAFR_4_3_0_1         | None           | 2.6588 | 0.0000 | None           | 7.2981 | 0.0000 | None                  |
| 641 | Human Plasma exp_4 | 25323        | Vitronectin                   | NGSLFAFR_4_3_0_1         | None           | 2.0830 | 0.0000 | None           | 7.2396 | 0.0000 | None                  |
| 642 | Human Plasma exp_5 | 24584        | Vitronectin                   | NGSLFAFR_4_3_0_1         | None           | 2.1565 | 0.0000 | None           | 7.2654 | 0.0000 | None                  |
| 643 | Human Plasma exp_1 | 24613        | Vitronectin                   | NGSLFAFR_5_3_0_1         | None           | 4.0558 | 0.0000 | None           | 7.3083 | 0.0000 | None                  |
| 644 | Human Plasma exp_2 | 25113        | Vitronectin                   | NGSLFAFR_5_3_0_1         | None           | 3.7665 | 0.0000 | None           | 7.3156 | 0.0000 | None                  |
| 645 | Human Plasma exp_3 | 24606        | Vitronectin                   | NGSLFAFR_5_3_0_1         | None           | 3.5422 | 0.0000 | None           | 7.3236 | 0.0000 | None                  |
| 646 | Human Plasma exp_4 | 25094        | Vitronectin                   | NGSLFAFR_5_3_0_1         | None           | 3.1928 | 0.0000 | None           | 7.2811 | 0.0000 | None                  |
| 647 | Human Plasma exp_5 | 24407        | Vitronectin                   | NGSLFAFR_5_3_0_1         | None           | 3.8690 | 0.0000 | None           | 7.3346 | 0.0000 | None                  |
| 648 | Human Plasma exp_1 | 24402        | Vitronectin                   | NGSLFAFR_5_4_0_1         | None           | 3.0336 | 0.0000 | None           | 7.3021 | 0.0000 | None                  |
| 649 | Human Plasma exp_3 | 24438        | Vitronectin                   | NGSLFAFR_5_4_0_1         | None           | 2.9695 | 0.0000 | None           | 7.3077 | 0.0000 | None                  |
| 650 | Human Plasma exp_4 | 25041        | Vitronectin                   | NGSLFAFR_5_4_0_1         | None           | 2.6744 | 0.0000 | None           | 7.3030 | 0.0000 | None                  |
| 651 | Human Plasma exp_5 | 24199        | Vitronectin                   | NGSLFAFR_5_4_0_1         | None           | 3.0028 | 0.0000 | None           | 7.3141 | 0.0000 | None                  |
| 652 | Human Plasma exp_1 | 27909        | Vitronectin                   | NGSLFAFR_5_4_0_2         | None           | 3.5620 | 0.0000 | None           | 7.2972 | 0.0000 | None                  |
| 653 | Human Plasma exp_1 | 27933        | Vitronectin                   | NGSLFAFR_5_4_0_2         | None           | 2.5089 | 0.0000 | None           | 7.1448 | 0.0000 | None                  |
| 654 | Human Plasma exp_2 | 28613        | Vitronectin                   | NGSLFAFR_5_4_0_2         | None           | 3.5303 | 0.0000 | None           | 7.2960 | 0.0000 | None                  |
| 655 | Human Plasma exp_5 | 27590        | Vitronectin                   | NGSLFAFR_5_4_0_2         | None           | 3.6605 | 0.0000 | None           | 7.3029 | 0.0000 | Outer                 |
| 656 | Human Plasma exp_4 | 28463        | Vitronectin                   | NGSLFAFR_5_4_1_2         | Outer          | 2.7883 | 0.0000 | Outer          | 6.4685 | 0.0033 | None                  |
| 657 | Human Plasma exp_1 | 24437        | Vitronectin                   | NGSLFAFR_6_3_0_1         | None           | 2.8867 | 0.0000 | None           | 7.2914 | 0.0000 | None                  |
| 658 | Human Plasma exp_2 | 24915        | Vitronectin                   | NGSLFAFR_6_3_0_1         | None           | 3.5730 | 0.0000 | None           | 7.2854 | 0.0000 | None                  |
| 659 | Human Plasma exp_3 | 24459        | Vitronectin                   | NGSLFAFR_6_3_0_1         | None           | 3.3064 | 0.0000 | None           | 7.2795 | 0.0000 | None                  |

**Supplementary Table 8.** Continued.

| No. | Experiment         | CID Scan No. | N-glycoproteins           | N-glycopeptides                 | SVM            |        |        | DNN            |        |        | Manual Classification |
|-----|--------------------|--------------|---------------------------|---------------------------------|----------------|--------|--------|----------------|--------|--------|-----------------------|
|     |                    |              |                           |                                 | Classification | Pscore | FDR    | Classification | Pscore | FDR    |                       |
| 660 | Human Plasma exp_4 | 24929        | Vitronectin               | NGSLFAFR_6_3_0_1                | None           | 2.8869 | 0.0000 | None           | 7.2845 | 0.0000 | None                  |
| 661 | Human Plasma exp_5 | 24229        | Vitronectin               | NGSLFAFR_6_3_0_1                | None           | 3.0447 | 0.0000 | None           | 7.2841 | 0.0000 | Outer                 |
| 662 | Human Plasma exp_2 | 31304        | Vitronectin               | NGSLFAFR_6_5_1_3                | Outer          | 3.7531 | 0.0000 | Outer          | 6.4679 | 0.0033 | Outer                 |
| 663 | Human Plasma exp_3 | 30798        | Vitronectin               | NGSLFAFR_6_5_1_3                | Outer          | 5.2272 | 0.0000 | Outer          | 6.4406 | 0.0033 | Outer                 |
| 664 | Human Plasma exp_4 | 31068        | Vitronectin               | NGSLFAFR_6_5_1_3                | Outer          | 4.2202 | 0.0000 | Outer          | 6.2742 | 0.0032 | None                  |
| 665 | Human Plasma exp_3 | 21145        | Vitronectin               | NNATVHEQVGGPSLTSDLQAQSK_5_4_0_2 | None           | 3.7693 | 0.0000 | None           | 7.3536 | 0.0000 | None                  |
| 666 | Human Plasma exp_4 | 21736        | Vitronectin               | NNATVHEQVGGPSLTSDLQAQSK_5_4_0_2 | None           | 3.6739 | 0.0000 | None           | 7.3496 | 0.0000 | None                  |
| 667 | Human Plasma exp_1 | 16030        | Zinc-alpha-2-glycoprotein | FGCEIENNR_5_4_0_2               | None           | 1.3881 | 0.0000 | None           | 7.2177 | 0.0000 | None                  |
| 668 | Human Plasma exp_2 | 16224        | Zinc-alpha-2-glycoprotein | FGCEIENNR_5_4_0_2               | None           | 4.0204 | 0.0000 | None           | 7.3263 | 0.0000 | None                  |
| 669 | Human Plasma exp_3 | 15877        | Zinc-alpha-2-glycoprotein | FGCEIENNR_5_4_0_2               | None           | 3.2344 | 0.0000 | None           | 7.3103 | 0.0000 | None                  |
| 670 | Human Plasma exp_4 | 16245        | Zinc-alpha-2-glycoprotein | FGCEIENNR_5_4_0_2               | None           | 3.4918 | 0.0000 | None           | 7.3125 | 0.0000 | None                  |
| 671 | Human Plasma exp_5 | 15970        | Zinc-alpha-2-glycoprotein | FGCEIENNR_5_4_0_2               | None           | 3.3247 | 0.0000 | None           | 7.3049 | 0.0000 | None                  |

**Supplementary Table 9.** N-glycopeptide having both core and outer type fucosylation in human plasma.

| No. | N-glycoproteins               | N-site | N-glycoproteins         | Classification | Reference |
|-----|-------------------------------|--------|-------------------------|----------------|-----------|
| 1   | Alpha-1-acid glycoprotein 1,2 | 56     | NEEYNK_5_4_1_2          | Core           | New       |
| 2   | Alpha-1-acid glycoprotein 1,2 | 56     | NEEYNK_6_5_1_2          | Outer          | New       |
| 3   | Alpha-1-acid glycoprotein 1,2 | 56     | NEEYNK_6_5_1_3          | Outer          | New       |
| 4   | Alpha-1-acid glycoprotein 1,2 | 56     | NEEYNK_6_5_2_3          | Dual           | New       |
| 5   | Alpha-2-HS-glycoprotein       | 156    | VCQDCPLLAPLNDTR_5_4_1_2 | Core           | [1]*      |
| 6   | Alpha-2-HS-glycoprotein       | 156    | VCQDCPLLAPLNDTR_6_5_1_3 | Outer          | New       |
| 7   | Hemopexin                     | 187    | SWPAVGNCSALR_5_4_1_2    | Core           | [2]*      |
| 8   | Hemopexin                     | 187    | SWPAVGNCSALR_6_5_1_3    | Outer          | [2]*,[3]* |

[1] Hägglund, P.; Matthiesen, R.; Elortza, F.; Højrup, P.; Roepstorff, P.; Jensen, O. N.; Bunkenborg, J. J. *Proteome Res.* 2007, 6, 3021-3031.

[2] Benicky, J.; Sanda, M.; Pompach, P.; Wu, J.; Goldman R. *Anal Chem.* 2014, 86, 10716-10723.

[3] Pompach, P.; Ashline, D. J.; Brnakova, Z.; Benicky, J.; Sanda, M.; Goldman, R. *J Proteome Res.* 2014, 13, 5561-5569.

**Supplementary Table 10.** Total fucosylated N-glycopeptides of proteins in human plasma commonly classified by SVM and DNN. A total of 46 fucosylated N-glycopeptides were validated previously (with references), while 36 were newly found.

| No. | Glycoproteins                 | N-site | N-glycopeptides                | Manual | Classification | References |
|-----|-------------------------------|--------|--------------------------------|--------|----------------|------------|
| 1   | Alpha-1-acid glycoprotein 1   | 103    | ENGTISR_5_4_1_2                | Outer  | Outer          | New        |
| 2   | Alpha-1-acid glycoprotein 1   | 103    | ENGTISR_6_5_1_3                | Outer  | Outer          | New        |
| 3   | Alpha-1-acid glycoprotein 1   | 103    | ENGTISR_7_6_1_4                | Outer  | Outer          | New        |
| 4   | Alpha-1-acid glycoprotein 1   | 103    | ENGTISR_7_6_2_4                | Outer  | Outer          | New        |
| 5   | Alpha-1-acid glycoprotein 1   | 33     | LVPVPITNATLDQITGK_6_5_1_2      | Outer  | Outer          | New        |
| 6   | Alpha-1-acid glycoprotein 1   | 33     | LVPVPITNATLDQITGK_6_5_1_3      | Outer  | Outer          | New        |
| 7   | Alpha-1-acid glycoprotein 1   | 93     | QDQCIYNTTYLNVQR_6_5_1_3        | Outer  | Outer          | New        |
| 8   | Alpha-1-acid glycoprotein 1,2 | 56     | NEEYNK_5_4_1_2                 | Core   | Core           | New        |
| 9   | Alpha-1-acid glycoprotein 1,2 | 56     | NEEYNK_6_5_1_2                 | Outer  | Outer          | New        |
| 10  | Alpha-1-acid glycoprotein 1,2 | 56     | NEEYNK_6_5_1_3                 | Outer  | Outer          | New        |
| 11  | Alpha-1-acid glycoprotein 1,2 | 56     | NEEYNK_6_5_2_3                 | Dual   | Dual           | New        |
| 12  | Alpha-1-acid glycoprotein 2   | 103    | ENGTVSR_6_5_1_3                | Outer  | Outer          | New        |
| 13  | Alpha-1-acid glycoprotein 2   | 103    | ENGTVSR_6_5_2_3                | Outer  | Dual           | New        |
| 14  | Alpha-1-acid glycoprotein 2   | 103    | ENGTVSR_7_6_1_4                | Outer  | Outer          | New        |
| 15  | Alpha-1-acid glycoprotein 2   | 103    | ENGTVSR_7_6_2_4                | Outer  | Outer          | New        |
| 16  | Alpha-1-acid glycoprotein 2   | 33     | LVPVPITNATLDR_6_5_1_3          | Outer  | Outer          | New        |
| 17  | Alpha-1-antichymotrypsin      | 186    | NGTR_6_5_1_3                   | Core   | Core           | New        |
| 18  | Alpha-2-HS-glycoprotein       | 156    | VCQDCPLLAPLNDTR_5_4_1_2        | Core   | Core           | [46]       |
| 19  | Alpha-2-HS-glycoprotein       | 156    | VCQDCPLLAPLNDTR_6_5_1_3        | Outer  | Outer          | New        |
| 20  | Apolipoprotein D              | 98     | ADGTVNQIEGEATPVNLTEPAK_5_4_1_1 | Core   | Core           | New        |
| 21  | Apolipoprotein D              | 98     | ADGTVNQIEGEATPVNLTEPAK_5_4_1_2 | Core   | Core           | New        |
| 22  | Beta-2-glycoprotein 1         | 162    | VYKPSAGNSLYR_6_5_1_3           | Outer  | Outer          | New        |
| 23  | Ceruloplasmin                 | 138    | EHEGAIYPDNTTDFQR_4_3_1_1       | Core   | Core           | [46]       |
| 24  | Ceruloplasmin                 | 762    | ELHHLQEQNVSNAFLDK_5_4_1_2      | Core   | Core           | [46]       |
| 25  | Clusterin                     | 86     | EDALNETR_6_5_1_3               | Outer  | Outer          | New        |
| 26  | Clusterin                     | 374    | LANLTQGEDQYYLR_6_5_1_3         | Outer  | Outer          | New        |
| 27  | Complement component C7       | 754    | NYTLTGR_5_4_1_2                | Core   | Core           | New        |
| 28  | Haptoglobin                   | 241    | VVLHPNYSQVDIGLIK_6_5_1_3       | Outer  | Outer          | [23],[49]  |
| 29  | Hemopexin                     | 187    | SWPAVGNCSSALR_5_4_1_2          | Core   | Core           | [47]       |
| 30  | Hemopexin                     | 187    | SWPAVGNCSSALR_6_5_1_3          | Outer  | Outer          | [23],[47]  |



**Supplementary Table 10.** Continued.

| No. | Glycoproteins             | N-site | N-glycopeptides   | Manual | Classification | References |
|-----|---------------------------|--------|-------------------|--------|----------------|------------|
| 31  | Ig alpha-2 chain C region | 205    | TPLTANITK_5_4_1_1 | Core   | Core           | [46]       |
| 32  | Ig alpha-2 chain C region | 205    | TPLTANITK_5_4_1_2 | Core   | Core           | [46]       |
| 33  | Ig alpha-2 chain C region | 205    | TPLTANITK_5_5_1_1 | Core   | Core           | [46]       |
| 34  | Ig gamma-1 chain C region | 180    | EEQYNSTYR_3_3_1_0 | Core   | Core           | [46]       |
| 35  | Ig gamma-1 chain C region | 180    | EEQYNSTYR_3_4_1_0 | Core   | Core           | [46]       |
| 36  | Ig gamma-1 chain C region | 180    | EEQYNSTYR_4_3_1_0 | Core   | Core           | [46]       |
| 37  | Ig gamma-1 chain C region | 180    | EEQYNSTYR_4_3_1_1 | Core   | Core           | [46]       |
| 38  | Ig gamma-1 chain C region | 180    | EEQYNSTYR_4_4_1_0 | Core   | Core           | [46]       |
| 39  | Ig gamma-1 chain C region | 180    | EEQYNSTYR_4_4_1_1 | Core   | Core           | [46]       |
| 40  | Ig gamma-1 chain C region | 180    | EEQYNSTYR_4_5_1_0 | Core   | Core           | [46]       |
| 41  | Ig gamma-1 chain C region | 180    | EEQYNSTYR_5_3_1_1 | Core   | Core           | [46]       |
| 42  | Ig gamma-1 chain C region | 180    | EEQYNSTYR_5_4_1_0 | Core   | Core           | [46]       |
| 43  | Ig gamma-1 chain C region | 180    | EEQYNSTYR_5_4_1_1 | Core   | Core           | [46]       |
| 44  | Ig gamma-1 chain C region | 180    | EEQYNSTYR_5_4_2_0 | Dual   | Outer          | New        |
| 45  | Ig gamma-1 chain C region | 180    | EEQYNSTYR_5_4_2_1 | Dual   | Dual           | New        |
| 46  | Ig gamma-1 chain C region | 180    | EEQYNSTYR_5_5_1_0 | Core   | Core           | [46]       |
| 47  | Ig gamma-2 chain C region | 176    | EEQFNSTFR_3_3_1_0 | Core   | Core           | [46]       |
| 48  | Ig gamma-2 chain C region | 176    | EEQFNSTFR_3_4_1_0 | Core   | Core           | [46]       |
| 49  | Ig gamma-2 chain C region | 176    | EEQFNSTFR_4_3_1_0 | Core   | Core           | [46]       |
| 50  | Ig gamma-2 chain C region | 176    | EEQFNSTFR_4_3_1_1 | Core   | Core           | [46]       |
| 51  | Ig gamma-2 chain C region | 176    | EEQFNSTFR_4_4_1_0 | Core   | Core           | [46]       |
| 52  | Ig gamma-2 chain C region | 176    | EEQFNSTFR_4_4_1_1 | Core   | Core           | [46]       |
| 53  | Ig gamma-2 chain C region | 176    | EEQFNSTFR_4_5_1_0 | Core   | Core           | [46]       |
| 54  | Ig gamma-2 chain C region | 176    | EEQFNSTFR_5_4_1_0 | Core   | Core           | [46]       |
| 55  | Ig gamma-2 chain C region | 176    | EEQFNSTFR_5_4_1_1 | Core   | Core           | [46]       |
| 56  | Ig gamma-2 chain C region | 176    | EEQFNSTFR_5_4_2_1 | Dual   | Dual           | New        |
| 57  | Ig gamma-2 chain C region | 176    | EEQFNSTFR_5_5_1_0 | Core   | Core           | [46]       |
| 58  | Ig gamma-2 chain C region | 176    | EEQFNSTFR_6_3_1_1 | Core   | Core           | [46]       |
| 59  | Ig gamma-3 chain C region | 227    | EEQYNSTFR_3_4_1_0 | Core   | Core           | New        |
| 60  | Ig gamma-3 chain C region | 227    | EEQYNSTFR_4_3_1_0 | Core   | Core           | New        |

**Supplementary Table 10.** Continued.

| No. | Glycoproteins                 | N-site | N-glycopeptides               | Manual | Classification | References |
|-----|-------------------------------|--------|-------------------------------|--------|----------------|------------|
| 61  | Ig gamma-3 chain C region     | 227    | EEQYNSTFR_5_4_1_0             | Core   | Core           | New        |
| 62  | Ig gamma-3 chain C region     | 227    | EEQYNSTFR_5_4_1_1             | Core   | Core           | New        |
| 63  | Ig gamma-4 chain C region     | 177    | EEQFNSTYR_3_3_1_0             | Core   | Core           | [46]       |
| 64  | Ig gamma-4 chain C region     | 177    | EEQFNSTYR_3_4_1_0             | Core   | Core           | [46]       |
| 65  | Ig gamma-4 chain C region     | 177    | EEQFNSTYR_3_5_1_0             | Core   | Core           | [46]       |
| 66  | Ig gamma-4 chain C region     | 177    | EEQFNSTYR_4_3_1_0             | Core   | Core           | [46]       |
| 67  | Ig gamma-4 chain C region     | 177    | EEQFNSTYR_4_4_1_0             | Core   | Core           | [46]       |
| 68  | Ig gamma-4 chain C region     | 177    | EEQFNSTYR_4_4_1_1             | Core   | Core           | [46]       |
| 69  | Ig gamma-4 chain C region     | 177    | EEQFNSTYR_4_5_1_0             | Core   | Core           | [46]       |
| 70  | Ig gamma-4 chain C region     | 177    | EEQFNSTYR_5_4_1_0             | Core   | Core           | [46]       |
| 71  | Ig mu chain C region          | 209    | GLTFQQNASSMCVPDQDTAIR_5_4_1_1 | Core   | Core           | [46]       |
| 72  | Ig mu chain C region          | 46     | NNSDISSTR_4_3_1_1             | Core   | Core           | [46]       |
| 73  | Ig mu chain C region          | 46     | NNSDISSTR_5_3_1_1             | Core   | Core           | [46]       |
| 74  | Ig mu chain C region          | 46     | NNSDISSTR_5_4_1_1             | Core   | Core           | [46]       |
| 75  | Ig mu chain C region          | 46     | NNSDISSTR_5_5_1_1             | Core   | Core           | [46]       |
| 76  | Ig mu chain C region          | 46     | NNSDISSTR_6_3_1_1             | Core   | Core           | [46]       |
| 77  | Immunoglobulin J chain        | 71     | ENISDPTSPLR_5_3_1_1           | Core   | Core           | New        |
| 78  | Kininogen-1                   | 205    | ITYSIVQTNCSK_6_5_1_3          | Outer  | Outer          | [23]       |
| 79  | Phospholipid transfer protein | 245    | NWSLPNR_5_4_1_2               | Core   | Core           | New        |
| 80  | Prothrombin                   | 121    | GHVNITR_5_4_1_2               | Outer  | Outer          | New        |
| 81  | Vitronectin                   | 169    | NGSLFAFR_5_4_1_2              | Outer  | Outer          | New        |
| 82  | Vitronectin                   | 169    | NGSLFAFR_6_5_1_3              | Outer  | Outer          | New        |

## Supplementary Figures

**Supplementary Figure 1.** Representative CID MS/MS spectra of N-glycopeptides of (A) EEQYNSTYR<sub>4\_4\_1\_0</sub> from an IgG standard and (B) NEEYNK<sub>6\_5\_1\_3</sub> from an AGP standard, which were classified as core and outer fucosylated N-glycopeptides, respectively. Green circles = mannose; yellow circles = galactose; blue squares = N-acetylglucosamine; red triangles = fucose; pink diamonds = N-acetylneuraminic acid; red arrow = fucosylation diagnostic ions; red box = fragmented ions pairs with or without fucose.





# Training set no. 2, Experiment: AGP exp\_1

ENGTISR(=PEP)\_4\_4\_0\_1, m/z:1264.51(2+), RT:16.60, Y-score:73.88

HCD Scan:2067



CID Scan:2066



### Training set no. 3, Experiment: AGP exp\_2

ENGTISR(=PEP)\_5\_4\_0\_2, m/z:994.40(3+), RT:20.63, Y-score:93.52

HCD Scan:3658



CID Scan:3657



# Training set no. 4, Experiment: AGP exp\_2

ENGTISR(=PEP)\_5\_4\_0\_2, m/z:1491.09(2+), RT:20.70, Y-score:87.78



# Training set no. 5, Experiment: AGP exp\_1

ENGTISR(=PEP)\_5\_4\_0\_2, m/z:994.39(3+), RT:20.92, Y-score:85.60





# Training set no. 6, Experiment: AGP exp\_1

ENGTISR(=PEP)\_6\_5\_0\_1, m/z:1019.07(3+), RT:16.83, Y-score:95.51



# Training set no. 7, Experiment: AGP exp\_1

ENGTISR(=PEP)\_6\_5\_0\_1, m/z:1019.07(3+), RT:17.35, Y-score:94.17



# Training set no. 8, Experiment: AGP exp\_1

ENGTISR(=PEP)\_6\_5\_0\_1, m/z:1019.07(3+), RT:17.86, Y-score:91.18



# Training set no. 9, Experiment: AGP exp\_2

ENGTISR(=PEP)\_6\_5\_0\_1, m/z:1019.07(3+), RT:17.88, Y-score:91.15



# Training set no. 10, Experiment: AGP exp\_2

ENGTISR(=PEP)\_6\_5\_0\_1, m/z:1019.07(3+), RT:17.37, Y-score:89.60



# Training set no. 11, Experiment: AGP exp\_2

ENGTISR(=PEP)\_6\_5\_0\_1, m/z:1019.07(3+), RT:16.85, Y-score:81.54



Training set no. 12, Experiment: AGP exp\_2

ENGTISR(=PEP)\_6\_5\_0\_2, m/z:1116.10(3+), RT:20.54, Y-score:94.27



Training set no. 13, Experiment: AGP exp\_1

ENGTISR(=PEP)\_6\_5\_0\_2, m/z:1116.11(3+), RT:21.26, Y-score:92.76





# Training set no. 14, Experiment: AGP exp\_2

ENGTISR(=PEP)\_6\_5\_0\_2, m/z:1116.11(3+), RT:21.15, Y-score:92.75



# Training set no. 15, Experiment: AGP exp\_1

ENGTISR(=PEP)\_6\_5\_0\_2, m/z:1115.77(3+), RT:20.75, Y-score:92.72



# Training set no. 16, Experiment: AGP exp\_2

ENGTISR(=PEP)\_6\_5\_0\_2, m/z:1673.65(2+), RT:20.86, Y-score:86.80



Training set no. 17, Experiment: AGP exp\_1

ENGTISR(=PEP)\_6\_5\_0\_3, m/z:1819.20(2+), RT:22.74, Y-score:92.35

HCD Scan:4839



CID Scan:4838



# Training set no. 18, Experiment: AGP exp\_1

ENGTISR(=PEP)\_6\_5\_0\_3, m/z:1213.14(3+), RT:22.59, Y-score:91.20



# Training set no. 19, Experiment: AGP exp\_2

ENGTISR(=PEP)\_6\_5\_0\_3, m/z:1213.14(3+), RT:25.16, Y-score:89.01

HCD Scan:6211



CID Scan:6210



Training set no. 20, Experiment: AGP exp\_1

ENGTISR(=PEP)\_6\_5\_0\_3, m/z:1213.14(3+), RT:23.17, Y-score:86.99

HCD Scan:5086



CID Scan:5085



# Training set no. 21, Experiment: AGP exp\_2

ENGTISR(=PEP)\_6\_5\_1\_1, m/z:1067.76(3+), RT:17.30, Y-score:89.41

HCD Scan:2249



CID Scan:2248





# Training set no. 22, Experiment: AGP exp\_1

ENGTISR(=PEP)\_6\_5\_1\_1, m/z:1067.76(3+), RT:17.02, Y-score:87.41

HCD Scan:2179



CID Scan:2178



Training set no. 23, Experiment: AGP exp\_1

ENGTISR(=PEP)\_6\_5\_1\_1, m/z:1067.76(3+), RT:17.53, Y-score:85.23



Training set no. 24, Experiment: AGP exp\_1

ENGTISR(=PEP)\_6\_5\_1\_1, m/z:1067.76(3+), RT:16.47, Y-score:80.85



# Training set no. 25, Experiment: AGP exp\_1

ENGTISR(=PEP)\_6\_5\_1\_2, m/z:1164.79(3+), RT:20.55, Y-score:87.82

HCD Scan:3644



CID Scan:3643



Training set no. 26, Experiment: AGP exp\_1

ENGTISR(=PEP)\_6\_5\_1\_2, m/z:1164.79(3+), RT:21.11, Y-score:84.03





Training set no. 28, Experiment: AGP exp\_2

ENGTISR(=PEP)\_6\_5\_1\_2, m/z:1164.79(3+), RT:20.91, Y-score:78.07



# Training set no. 29, Experiment: AGP exp\_2

ENGTISR(=PEP)\_6\_5\_1\_3, m/z:1261.82(3+), RT:22.65, Y-score:89.99





Training set no. 30, Experiment: AGP exp\_1

ENGTISR(=PEP)\_6\_5\_1\_3, m/z:1261.83(3+), RT:22.44, Y-score:86.94



# Training set no. 31, Experiment: AGP exp\_45

ENGTISR(=PEP)\_6\_5\_2\_3, m/z:1310.51(3+), RT:34.94, Y-score:97.54

HCD Scan:9463



CID Scan:9466



Training set no. 32, Experiment: AGP exp\_23

ENGTISR(=PEP)\_6\_5\_2\_3, m/z:1310.51(3+), RT:34.35, Y-score:91.68

HCD Scan:10180



CID Scan:10181



# Training set no. 33, Experiment: AGP exp\_29

ENGTISR(=PEP)\_6\_5\_2\_3, m/z:1310.51(3+), RT:39.89, Y-score:90.73

HCD Scan:7875



CID Scan:7877





Training set no. 35, Experiment: AGP exp\_8

ENGTISR(=PEP)\_6\_5\_2\_3, m/z:1310.51(3+), RT:33.86, Y-score:89.55

HCD Scan:8659



CID Scan:8661



# Training set no. 36, Experiment: AGP exp\_25

ENGTISR(=PEP)\_6\_5\_2\_3, m/z:1310.51(3+), RT:34.67, Y-score:89.42

HCD Scan:10473



CID Scan:10476



Training set no. 37, Experiment: AGP exp\_33

ENGTISR(=PEP)\_6\_5\_2\_3, m/z:1310.51(3+), RT:45.79, Y-score:89.05

HCD Scan:13177



CID Scan:13182





Training set no. 38, Experiment: AGP exp\_42

ENGTISR(=PEP)\_6\_5\_2\_3, m/z:1310.51(3+), RT:33.79, Y-score:88.83

HCD Scan:9924



CID Scan:9926



Training set no. 39, Experiment: AGP exp\_19

ENGTISR(=PEP)\_6\_5\_2\_3, m/z:1310.51(3+), RT:33.89, Y-score:88.44

HCD Scan:9705



CID Scan:9707



# Training set no. 40, Experiment: AGP exp\_17

ENGTISR(=PEP)\_6\_5\_2\_3, m/z:1310.51(3+), RT:33.79, Y-score:88.11

HCD Scan:9676



CID Scan:9678



# Training set no. 41, Experiment: AGP exp\_18

ENGTISR(=PEP)\_6\_5\_2\_3, m/z:1310.51(3+), RT:34.02, Y-score:88.02

HCD Scan:9687



CID Scan:9689



# Training set no. 42, Experiment: AGP exp\_38

ENGTISR(=PEP)\_6\_5\_2\_3, m/z:1310.51(3+), RT:33.70, Y-score:87.56

HCD Scan:9791



CID Scan:9793



Training set no. 43, Experiment: AGP exp\_26

ENGTISR(=PEP)\_6\_5\_2\_3, m/z:1310.51(3+), RT:34.55, Y-score:87.48

HCD Scan:10324



CID Scan:10331



# Training set no. 44, Experiment: AGP exp\_31

ENGTISR(=PEP)\_6\_5\_2\_3, m/z:1310.51(3+), RT:38.59, Y-score:87.16

HCD Scan:6867



CID Scan:6869



Training set no. 45, Experiment: AGP exp\_37

ENGTISR(=PEP)\_6\_5\_2\_3, m/z:1310.51(3+), RT:34.08, Y-score:86.98

HCD Scan:10107



CID Scan:10109





**Training set no. 46, Experiment: AGP exp\_13**

ENGTISR(=PEP)\_6\_5\_2\_3, m/z:1310.51(3+), RT:41.77, Y-score:86.46

HCD Scan:11996



CID Scan:11998



# Training set no. 47, Experiment: AGP exp\_1

ENGTISR(=PEP)\_6\_5\_2\_3, m/z:1310.51(3+), RT:22.60, Y-score:85.85



# Training set no. 48, Experiment: AGP exp\_9

ENGTISR(=PEP)\_6\_5\_2\_3, m/z:1310.51(3+), RT:33.70, Y-score:85.38

HCD Scan:8626



CID Scan:8629



Training set no. 49, Experiment: AGP exp\_33

ENGTISR(=PEP)\_6\_5\_2\_3, m/z:1310.51(3+), RT:34.41, Y-score:84.88

HCD Scan:8029



CID Scan:8034



# Training set no. 50, Experiment: AGP exp\_12

ENGTISR(=PEP)\_6\_5\_2\_3, m/z:1310.84(3+), RT:41.85, Y-score:84.53

HCD Scan:10876



CID Scan:10883



Training set no. 51, Experiment: AGP exp\_26

ENGTISR(=PEP)\_6\_5\_2\_3, m/z:1310.51(3+), RT:35.24, Y-score:84.35



Training set no. 52, Experiment: AGP exp\_42

ENGTISR(=PEP)\_6\_5\_2\_3, m/z:1310.51(3+), RT:34.39, Y-score:82.69



Training set no. 53, Experiment: AGP exp\_16

ENGTISR(=PEP)\_6\_5\_2\_3, m/z:1310.51(3+), RT:43.35, Y-score:82.25





Training set no. 54, Experiment: AGP exp\_43

ENGTISR(=PEP)\_6\_5\_2\_3, m/z:1310.51(3+), RT:34.11, Y-score:81.88



Training set no. 55, Experiment: AGP exp\_20

ENGTISR(=PEP)\_6\_5\_2\_3, m/z:1310.51(3+), RT:34.65, Y-score:81.72

HCD Scan:10300



CID Scan:10302



# Training set no. 56, Experiment: AGP exp\_15

ENGTISR(=PEP)\_6\_5\_2\_3, m/z:1310.51(3+), RT:43.44, Y-score:80.20

CID Scan:12340



CID Scan:12345



# Training set no. 57, Experiment: AGP exp\_2

ENGTISR(=PEP)\_6\_5\_2\_3, m/z:1310.51(3+), RT:22.62, Y-score:78.59



Training set no. 58, Experiment: AGP exp\_2

ENGTISR(=PEP)\_7\_6\_0\_3, m/z:1001.39(4+), RT:22.41, Y-score:70.19

HCD Scan:4641



CID Scan:4640



Training set no. 59, Experiment: AGP exp\_2

ENGTISR(=PEP)\_7\_6\_1\_1, m/z:1189.47(3+), RT:17.02, Y-score:92.33



# Training set no. 60, Experiment: AGP exp\_1

ENGTISR(=PEP)\_7\_6\_1\_2, m/z:1286.50(3+), RT:20.60, Y-score:94.32



Training set no. 61, Experiment: AGP exp\_2

ENGTISR(=PEP)\_7\_6\_1\_2, m/z:1286.51(3+), RT:19.93, Y-score:92.18





# Training set no. 62, Experiment: AGP exp\_2

ENGTISR(=PEP)\_7\_6\_1\_2, m/z:1286.50(3+), RT:20.49, Y-score:91.14



Training set no. 63, Experiment: AGP exp\_2

ENGTISR(=PEP)\_7\_6\_1\_2, m/z:1286.50(3+), RT:19.31, Y-score:90.96



Training set no. 64, Experiment: AGP exp\_1

ENGTISR(=PEP)\_7\_6\_1\_2, m/z:1286.50(3+), RT:20.01, Y-score:89.83

HCD Scan:3386



CID Scan:3385



# Training set no. 65, Experiment: AGP exp\_1

ENGTISR(=PEP)\_7\_6\_1\_2, m/z:1286.50(3+), RT:18.88, Y-score:89.39

HCD Scan:2791



CID Scan:2790



Training set no. 66, Experiment: AGP exp\_2

ENGTISR(=PEP)\_7\_6\_1\_2, m/z:1286.50(3+), RT:21.07, Y-score:84.98



# Training set no. 67, Experiment: AGP exp\_1

ENGTISR(=PEP)\_7\_6\_1\_3, m/z:1037.90(4+), RT:22.48, Y-score:87.39



Training set no. 68, Experiment: AGP exp\_2

ENGTISR(=PEP)\_7\_6\_1\_3, m/z:1037.90(4+), RT:22.51, Y-score:85.60



Training set no. 69, Experiment: AGP exp\_1

ENGTISR(=PEP)\_7\_6\_1\_4, m/z:1110.68(4+), RT:24.93, Y-score:86.37

HCD Scan:6103



CID Scan:6102





Training set no. 70, Experiment: AGP exp\_2

ENGTISR(=PEP)\_7\_6\_1\_4, m/z:1110.68(4+), RT:24.99, Y-score:83.30

HCD Scan:6115



CID Scan:6114



# Training set no. 71, Experiment: AGP exp\_1

ENGTISR(=PEP)\_7\_6\_2\_4, m/z:1147.19(4+), RT:24.59, Y-score:82.24



Training set no. 72, Experiment: AGP exp\_2

LVPVPITNATLDQITGK(=PEP)\_4\_4\_0\_1, m/z:1177.89(3+), RT:49.25, Y-score:79.33



# Training set no. 73, Experiment: AGP exp\_2

LVPVPITNATLDQITGK(=PEP)\_5\_4\_0\_1, m/z:1231.91(3+), RT:49.55, Y-score:86.40



Training set no. 74, Experiment: AGP exp\_2

LVPVPITNATLDQITGK(=PEP)\_5\_4\_0\_1, m/z:924.18(4+), RT:48.74, Y-score:74.67



# Training set no. 75, Experiment: AGP exp\_1

LVPVPITNATLDQITGK(=PEP)\_5\_4\_0\_1, m/z:924.18(4+), RT:49.14, Y-score:73.45



# Training set no. 76, Experiment: AGP exp\_1

LVPVPITNATLDQITGK(=PEP)\_5\_4\_0\_2, m/z:1328.94(3+), RT:55.54, Y-score:91.12



Training set no. 77, Experiment: AGP exp\_2

LVPVPITNATLDQITGK(=PEP)\_5\_4\_0\_2, m/z:1328.94(3+), RT:55.11, Y-score:88.66





Training set no. 78, Experiment: AGP exp\_1

LVPVPITNATLDQITGK(=PEP)\_5\_4\_0\_2, m/z:1329.28(3+), RT:54.99, Y-score:88.19



Training set no. 79, Experiment: AGP exp\_2

LVPVPITNATLDQITGK(=PEP)\_5\_4\_0\_2, m/z:1328.94(3+), RT:55.63, Y-score:88.15



Training set no. 80, Experiment: AGP exp\_2

LVPVPITNATLDQITGK(=PEP)\_5\_4\_0\_2, m/z:996.96(4+), RT:55.64, Y-score:83.43



Training set no. 81, Experiment: AGP exp\_1

LVPVPITNATLDQITGK(=PEP)\_5\_4\_0\_2, m/z:996.96(4+), RT:55.55, Y-score:82.20



Training set no. 82, Experiment: AGP exp\_1

LVPVPITNATLDQITGK(=PEP)\_6\_5\_0\_1, m/z:1015.46(4+), RT:48.59, Y-score:87.42



Training set no. 83, Experiment: AGP exp\_2

LVPVPITNATLDQITGK(=PEP)\_6\_5\_0\_1, m/z:1015.46(4+), RT:48.77, Y-score:86.99



Training set no. 84, Experiment: AGP exp\_2

LVPVPITNATLDQITGK(=PEP)\_6\_5\_0\_2, m/z:1450.65(3+), RT:54.68, Y-score:89.40



Training set no. 85, Experiment: AGP exp\_2

LVPVPITNATLDQITGK(=PEP)\_6\_5\_0\_2, m/z:1450.65(3+), RT:55.22, Y-score:88.41





**Training set no. 86, Experiment: AGP exp\_2**

LVPVPITNATLDQITGK(=PEP)\_6\_5\_0\_2, m/z:1088.24(4+), RT:62.56, Y-score:86.86



Training set no. 87, Experiment: AGP exp\_1

LVPVPITNATLDQITGK(=PEP)\_6\_5\_0\_2, m/z:1088.24(4+), RT:55.40, Y-score:84.31



Training set no. 88, Experiment: AGP exp\_1

LVPVPITNATLDQITGK(=PEP)\_6\_5\_0\_2, m/z:1088.24(4+), RT:54.70, Y-score:84.29



Training set no. 89, Experiment: AGP exp\_1

LVPVPITNATLDQITGK(=PEP)\_6\_5\_0\_2, m/z:1088.24(4+), RT:62.30, Y-score:84.17



Training set no. 90, Experiment: AGP exp\_2

LVPVPITNATLDQITGK(=PEP)\_6\_5\_0\_2, m/z:1088.24(4+), RT:55.61, Y-score:82.40



Training set no. 91, Experiment: AGP exp\_2

LVPVPITNATLDQITGK(=PEP)\_6\_5\_0\_3, m/z:1547.69(3+), RT:62.75, Y-score:88.74



# Training set no. 92, Experiment: AGP exp\_1

LVPVPITNATLDQITGK(=PEP)\_6\_5\_0\_3, m/z:1160.55(4+), RT:62.43, Y-score:87.90



Training set no. 93, Experiment: AGP exp\_1

LVPVPITNATLDQITGK(=PEP)\_6\_5\_0\_3, m/z:1547.69(3+), RT:62.07, Y-score:87.11





Training set no. 94, Experiment: AGP exp\_2

LVPVPITNATLDQITGK(=PEP)\_6\_5\_0\_3, m/z:1160.76(4+), RT:62.05, Y-score:86.06



# Training set no. 95, Experiment: AGP exp\_1

LVPVPITNATLDQITGK(=PEP)\_6\_5\_0\_3, m/z:1161.01(4+), RT:62.70, Y-score:85.71



Training set no. 96, Experiment: AGP exp\_1

LVPVPITNATLDQITGK(=PEP)\_6\_5\_0\_3, m/z:1161.03(4+), RT:62.15, Y-score:84.03



Training set no. 97, Experiment: AGP exp\_2

LVPVPITNATLDQITGK(=PEP)\_6\_5\_0\_3, m/z:1161.01(4+), RT:63.11, Y-score:83.17



Training set no. 98, Experiment: AGP exp\_2

LVPVPITNATLDQITGK(=PEP)\_6\_5\_1\_1, m/z:1402.30(3+), RT:48.63, Y-score:87.75



Training set no. 99, Experiment: AGP exp\_1

LVPVPITNATLDQITGK(=PEP)\_6\_5\_1\_1, m/z:1402.30(3+), RT:48.47, Y-score:87.52



# Training set no. 100, Experiment: AGP exp\_2

LVPVPITNATLDQITGK(=PEP)\_6\_5\_1\_1, m/z:1051.98(4+), RT:48.65, Y-score:74.96



Training set no. 101, Experiment: AGP exp\_1

LVPVPITNATLDQITGK(=PEP)\_6\_5\_1\_2, m/z:1499.34(3+), RT:54.78, Y-score:89.06





# Training set no. 102, Experiment: AGP exp\_2

LVPVPITNATLDQITGK(=PEP)\_6\_5\_1\_2, m/z:1499.33(3+), RT:54.39, Y-score:88.72



Training set no. 103, Experiment: AGP exp\_2

LVPVPITNATLDQITGK(=PEP)\_6\_5\_1\_2, m/z:1499.33(3+), RT:54.94, Y-score:86.57



Training set no. 104, Experiment: AGP exp\_2

LVPVPITNATLDQITGK(=PEP)\_6\_5\_1\_2, m/z:1124.76(4+), RT:54.77, Y-score:83.39



Training set no. 105, Experiment: AGP exp\_1

LVPVPITNATLDQITGK(=PEP)\_6\_5\_1\_2, m/z:1124.75(4+), RT:54.81, Y-score:83.10



Training set no. 106, Experiment: AGP exp\_1

LVPVPITNATLDQITGK(=PEP)\_6\_5\_1\_2, m/z:1124.75(4+), RT:54.23, Y-score:77.73



Training set no. 107, Experiment: AGP exp\_1

LVPVPITNATLDQITGK(=PEP)\_6\_5\_1\_3, m/z:1596.37(3+), RT:62.80, Y-score:87.90



Training set no. 108, Experiment: AGP exp\_2

LVPVPITNATLDQITGK(=PEP)\_6\_5\_1\_3, m/z:1596.37(3+), RT:62.39, Y-score:87.08



Training set no. 109, Experiment: AGP exp\_2

LVPVPITNATLDQITGK(=PEP)\_6\_5\_1\_3, m/z:1596.37(3+), RT:62.91, Y-score:86.57





Training set no. 110, Experiment: AGP exp\_1

LVPVPITNATLDQITGK(=PEP)\_6\_5\_1\_3, m/z:1596.37(3+), RT:62.28, Y-score:85.27



# Training set no. 111, Experiment: AGP exp\_1

LVPVPITNATLDQITGK(=PEP)\_6\_5\_1\_3, m/z:1198.28(4+), RT:62.05, Y-score:85.05





Training set no. 113, Experiment: AGP exp\_2

LVPVPITNATLDQITGK(=PEP)\_6\_5\_1\_3, m/z:1197.53(4+), RT:62.47, Y-score:83.39





Training set no. 115, Experiment: AGP exp\_2

LVPVPITNATLDQITGK(=PEP)\_6\_5\_1\_3, m/z:1197.53(4+), RT:62.98, Y-score:79.11



Training set no. 116, Experiment: AGP exp\_19

LVPVPITNATLDQITGK(=PEP)\_6\_5\_2\_2, m/z:1548.02(3+), RT:96.52, Y-score:87.84

HCD Scan:35456



CID Scan:35459



Training set no. 117, Experiment: AGP exp\_11

LVPVPITNATLDQITGK(=PEP)\_6\_5\_2\_3, m/z:1234.04(4+), RT:82.88, Y-score:79.26

HCD Scan:29918



CID Scan:29920





# Training set no. 118, Experiment: AGP exp\_1

NEEYNK(=PEP)\_4\_3\_0\_0, m/z:1027.40(2+), RT:15.42, Y-score:88.87



Training set no. 119, Experiment: AGP exp\_2

NEEYNK(=PEP)\_4\_3\_0\_0, m/z:1027.40(2+), RT:15.47, Y-score:87.20



# Training set no. 120, Experiment: AGP exp\_2

NEEYNK(=PEP)\_4\_3\_0\_1, m/z:1172.95(2+), RT:14.72, Y-score:92.61



# Training set no. 121, Experiment: AGP exp\_2

NEEYNK(=PEP)\_4\_3\_0\_1, m/z:1172.95(2+), RT:14.71, Y-score:90.59







# Training set no. 124, Experiment: AGP exp\_1

NEEYNK(=PEP)\_4\_3\_0\_1, m/z:1172.95(2+), RT:14.59, Y-score:88.43



# Training set no. 125, Experiment: AGP exp\_2

NEEYNK(=PEP)\_4\_4\_0\_1, m/z:1274.49(2+), RT:15.37, Y-score:93.76





# Training set no. 126, Experiment: AGP exp\_2

NEEYNK(=PEP)\_4\_4\_0\_1, m/z:1274.49(2+), RT:15.88, Y-score:93.73



# Training set no. 127, Experiment: AGP exp\_1

NEEYNK(=PEP)\_4\_4\_0\_1, m/z:1274.49(2+), RT:15.82, Y-score:91.92



# Training set no. 128, Experiment: AGP exp\_1

NEEYNK(=PEP)\_4\_4\_0\_1, m/z:1274.49(2+), RT:15.31, Y-score:91.35

HCD Scan:1572



CID Scan:1571



# Training set no. 129, Experiment: AGP exp\_1

NEEYNK(=PEP)\_4\_4\_0\_1, m/z:850.00(3+), RT:15.39, Y-score:85.10



# Training set no. 130, Experiment: AGP exp\_1

NEEYNK(=PEP)\_5\_4\_0\_0, m/z:1209.97(2+), RT:14.42, Y-score:93.60

HCD Scan:1433



CID Scan:1432



# Training set no. 131, Experiment: AGP exp\_2

NEEYNK(=PEP)\_5\_4\_0\_0, m/z:1209.97(2+), RT:14.41, Y-score:89.37



# Training set no. 132, Experiment: AGP exp\_2

NEEYNK(=PEP)\_5\_4\_0\_0, m/z:1209.97(2+), RT:15.48, Y-score:88.16



Training set no. 133, Experiment: AGP exp\_2

NEEYNK(=PEP)\_5\_4\_0\_0, m/z:1209.97(2+), RT:16.07, Y-score:83.04

HCD Scan:1872



CID Scan:1871





Training set no. 134, Experiment: AGP exp\_2

NEEYNK(=PEP)\_5\_4\_0\_1, m/z:904.02(3+), RT:16.39, Y-score:94.18



# Training set no. 135, Experiment: AGP exp\_2

NEEYNK(=PEP)\_5\_4\_0\_1, m/z:1355.52(2+), RT:16.38, Y-score:93.62



Training set no. 136, Experiment: AGP exp\_2

NEEYNK(=PEP)\_5\_4\_0\_1, m/z:904.02(3+), RT:15.88, Y-score:92.93



# Training set no. 137, Experiment: AGP exp\_2

NEEYNK(=PEP)\_5\_4\_0\_1, m/z:1356.02(2+), RT:15.88, Y-score:92.65



# Training set no. 138, Experiment: AGP exp\_1

NEEYNK(=PEP)\_5\_4\_0\_1, m/z:904.02(3+), RT:16.31, Y-score:92.64



# Training set no. 139, Experiment: AGP exp\_1

NEEYNK(=PEP)\_5\_4\_0\_1, m/z:1356.02(2+), RT:15.79, Y-score:92.62



# Training set no. 140, Experiment: AGP exp\_2

NEEYNK(=PEP)\_5\_4\_0\_1, m/z:1355.52(2+), RT:19.17, Y-score:92.38



# Training set no. 141, Experiment: AGP exp\_1

NEEYNK(=PEP)\_5\_4\_0\_1, m/z:1355.52(2+), RT:18.94, Y-score:90.87





Training set no. 142, Experiment: AGP exp\_1

NEEYNK(=PEP)\_5\_4\_0\_1, m/z:1355.02(2+), RT:16.30, Y-score:90.49



Training set no. 143, Experiment: AGP exp\_1

NEEYNK(=PEP)\_5\_4\_0\_1, m/z:1355.52(2+), RT:16.81, Y-score:82.69

HCD Scan:2123



CID Scan:2122



# Training set no. 144, Experiment: AGP exp\_2

NEEYNK(=PEP)\_5\_4\_0\_1, m/z:1355.52(2+), RT:16.90, Y-score:76.74



Training set no. 145, Experiment: AGP exp\_2

NEEYNK(=PEP)\_5\_4\_0\_1, m/z:1356.02(2+), RT:17.40, Y-score:74.66

HCD Scan:2281



CID Scan:2280



# Training set no. 146, Experiment: AGP exp\_1

NEEYNK(=PEP)\_5\_4\_0\_2, m/z:1001.05(3+), RT:18.74, Y-score:94.31



Training set no. 147, Experiment: AGP exp\_2

NEEYNK(=PEP)\_5\_4\_0\_2, m/z:1001.05(3+), RT:20.24, Y-score:93.99





Training set no. 149, Experiment: AGP exp\_1

NEEYNK(=PEP)\_5\_4\_0\_2, m/z:1001.05(3+), RT:19.84, Y-score:93.35







Training set no. 151, Experiment: AGP exp\_1

NEEYNK(=PEP)\_5\_4\_0\_2, m/z:1001.05(3+), RT:19.33, Y-score:93.20

HCD Scan:3043



# Training set no. 152, Experiment: AGP exp\_2

NEEYNK(=PEP)\_5\_4\_0\_2, m/z:1001.05(3+), RT:19.69, Y-score:93.11



Training set no. 153, Experiment: AGP exp\_2

NEEYNK(=PEP)\_5\_4\_0\_2, m/z:1501.57(2+), RT:18.61, Y-score:92.44

HCD Scan:2546



CID Scan:2545



# Training set no. 154, Experiment: AGP exp\_2

NEEYNK(=PEP)\_5\_4\_0\_2, m/z:1501.57(2+), RT:19.72, Y-score:91.44



Training set no. 155, Experiment: AGP exp\_2

NEEYNK(=PEP)\_5\_4\_0\_2, m/z:1001.05(3+), RT:18.93, Y-score:93.85



Training set no. 156, Experiment: AGP exp\_1

NEEYNK(=PEP)\_5\_4\_0\_2, m/z:1501.57(2+), RT:19.46, Y-score:89.31



**Training set no. 157, Experiment: AGP exp\_2**

NEEYNK(=PEP)\_5\_4\_0\_2, m/z:1501.57(2+), RT:22.17, Y-score:86.21





Training set no. 158, Experiment: AGP exp\_2

NEEYNK(=PEP)\_5\_4\_0\_2, m/z:1001.05(3+), RT:20.79, Y-score:82.86

HCD Scan:3739



CID Scan:3738



Training set no. 159, Experiment: AGP exp\_2

NEEYNK(=PEP)\_5\_4\_0\_2, m/z:1501.06(2+), RT:20.29, Y-score:82.07



# Training set no. 160, Experiment: AGP exp\_1

NEEYNK(=PEP)\_5\_4\_0\_2, m/z:1501.57(2+), RT:20.01, Y-score:80.64

HCD Scan:3388



CID Scan:3387



# Training set no. 161, Experiment: AGP exp\_2

NEEYNK(=PEP)\_5\_4\_0\_2, m/z:1501.07(2+), RT:20.89, Y-score:68.11

HCD Scan:3795



CID Scan:3794



# Training set no. 162, Experiment: AGP exp\_1

NEEYNK(=PEP)\_5\_4\_1\_2, m/z:1049.73(3+), RT:19.21, Y-score:93.39



# Training set no. 163, Experiment: AGP exp\_2

NEEYNK(=PEP)\_5\_4\_1\_2, m/z:1049.73(3+), RT:19.65, Y-score:91.41



# Training set no. 164, Experiment: AGP exp\_1

NEEYNK(=PEP)\_5\_4\_1\_2, m/z:1049.73(3+), RT:18.12, Y-score:87.40

HCD Scan:2421



CID Scan:2420



Training set no. 165, Experiment: AGP exp\_2

NEEYNK(=PEP)\_5\_4\_1\_2, m/z:1049.73(3+), RT:18.46, Y-score:84.28





# Training set no. 166, Experiment: AGP exp\_1

NEEYNK(=PEP)\_5\_4\_1\_2, m/z:1049.73(3+), RT:18.64, Y-score:74.53



# Training set no. 167, Experiment: AGP exp\_2

NEEYNK(=PEP)\_5\_4\_1\_2, m/z:1049.73(3+), RT:19.06, Y-score:71.02



# Training set no. 168, Experiment: AGP exp\_19

NEEYNK(=PEP)\_5\_4\_2\_2, m/z:1098.42(3+), RT:21.11, Y-score:90.34

HCD Scan:4348



CID Scan:4351



# Training set no. 169, Experiment: AGP exp\_9

NEEYNK(=PEP)\_5\_4\_2\_2, m/z:1098.42(3+), RT:21.04, Y-score:84.28



# Training set no. 170, Experiment: AGP exp\_36

NEEYNK(=PEP)\_5\_4\_2\_2, m/z:1098.42(3+), RT:21.69, Y-score:81.81



Training set no. 171, Experiment: AGP exp\_22

NEEYNK(=PEP)\_5\_4\_2\_2, m/z:1098.42(3+), RT:21.05, Y-score:81.35

HCD Scan:4450



CID Scan:4457



# Training set no. 172, Experiment: AGP exp\_13

NEEYNK(=PEP)\_5\_4\_2\_2, m/z:1098.42(3+), RT:23.43, Y-score:79.60

### HCD Scan:4968



### CID Scan:4971



Training set no. 173, Experiment: AGP exp\_15

NEEYNK(=PEP)\_5\_4\_2\_2, m/z:1098.42(3+), RT:23.37, Y-score:77.97

HCD Scan:4696





Training set no. 174, Experiment: AGP exp\_20

NEEYNK(=PEP)\_5\_4\_2\_2, m/z:1098.42(3+), RT:21.02, Y-score:77.21



Training set no. 175, Experiment: AGP exp\_23

NEEYNK(=PEP)\_5\_4\_2\_2, m/z:1098.42(3+), RT:21.11, Y-score:76.23



Training set no. 176, Experiment: AGP exp\_1

NEEYNK(=PEP)\_5\_5\_0\_2, m/z:1068.74(3+), RT:20.53, Y-score:85.04



Training set no. 177, Experiment: AGP exp\_2

NEEYNK(=PEP)\_6\_5\_0\_1, m/z:1025.73(3+), RT:16.92, Y-score:94.32



# Training set no. 178, Experiment: AGP exp\_2

NEEYNK(=PEP)\_6\_5\_0\_1, m/z:1025.73(3+), RT:16.41, Y-score:92.41



# Training set no. 179, Experiment: AGP exp\_1

NEEYNK(=PEP)\_6\_5\_0\_1, m/z:1025.73(3+), RT:16.25, Y-score:91.91



**Training set no. 180, Experiment: AGP exp\_2**

NEEYNK(=PEP)\_6\_5\_0\_1, m/z:1025.73(3+), RT:17.43, Y-score:91.57



# Training set no. 181, Experiment: AGP exp\_1

NEEYNK(=PEP)\_6\_5\_0\_1, m/z:1025.73(3+), RT:16.76, Y-score:91.19





# Training set no. 182, Experiment: AGP exp\_1

NEEYNK(=PEP)\_6\_5\_0\_1, m/z:1025.73(3+), RT:17.27, Y-score:90.41



# Training set no. 183, Experiment: AGP exp\_2

NEEYNK(=PEP)\_6\_5\_0\_1, m/z:1025.73(3+), RT:16.40, Y-score:89.88

HCD Scan:1968



CID Scan:1967



# Training set no. 184, Experiment: AGP exp\_2

NEEYNK(=PEP)\_6\_5\_0\_1, m/z:1538.09(2+), RT:17.14, Y-score:89.47



Training set no. 185, Experiment: AGP exp\_1

NEEYNK(=PEP)\_6\_5\_0\_1, m/z:1538.08(2+), RT:16.93, Y-score:89.07

HCD Scan:2160



CID Scan:2159



# Training set no. 186, Experiment: AGP exp\_1

NEEYNK(=PEP)\_6\_5\_0\_1, m/z:1025.73(3+), RT:15.74, Y-score:88.55



# Training set no. 187, Experiment: AGP exp\_2

NEEYNK(=PEP)\_6\_5\_0\_2, m/z:1122.76(3+), RT:19.88, Y-score:92.97



Training set no. 188, Experiment: AGP exp\_1

NEEYNK(=PEP)\_6\_5\_0\_2, m/z:1122.76(3+), RT:20.05, Y-score:92.96

HCD Scan:3404



CID Scan:3403



Training set no. 189, Experiment: AGP exp\_2

NEEYNK(=PEP)\_6\_5\_0\_2, m/z:1683.63(2+), RT:20.75, Y-score:92.76





# Training set no. 190, Experiment: AGP exp\_2

NEEYNK(=PEP)\_6\_5\_0\_2, m/z:1122.76(3+), RT:20.49, Y-score:91.93



Training set no. 191, Experiment: AGP exp\_1

NEEYNK(=PEP)\_6\_5\_0\_2, m/z:1122.42(3+), RT:20.60, Y-score:91.61



# Training set no. 192, Experiment: AGP exp\_1

NEEYNK(=PEP)\_6\_5\_0\_2, m/z:1122.76(3+), RT:19.53, Y-score:91.50



# Training set no. 193, Experiment: AGP exp\_1

NEEYNK(=PEP)\_6\_5\_0\_2, m/z:1122.76(3+), RT:18.97, Y-score:90.60



# Training set no. 194, Experiment: AGP exp\_2

NEEYNK(=PEP)\_6\_5\_0\_2, m/z:1122.76(3+), RT:21.04, Y-score:89.69

HCD Scan:3881



Training set no. 195, Experiment: AGP exp\_2

NEEYNK(=PEP)\_6\_5\_0\_2, m/z:1122.76(3+), RT:19.33, Y-score:87.23



# Training set no. 196, Experiment: AGP exp\_2

NEEYNK(=PEP)\_6\_5\_0\_2, m/z:1683.63(2+), RT:19.54, Y-score:83.36



Training set no. 197, Experiment: AGP exp\_1

NEEYNK(=PEP)\_6\_5\_0\_2, m/z:1123.09(3+), RT:21.15, Y-score:74.21





Training set no. 198, Experiment: AGP exp\_2

NEEYNK(=PEP)\_6\_5\_0\_3, m/z:1219.79(3+), RT:22.31, Y-score:91.73



# Training set no. 199, Experiment: AGP exp\_1

NEEYNK(=PEP)\_6\_5\_0\_3, m/z:1219.45(3+), RT:22.14, Y-score:90.80

HCD Scan:4492



CID Scan:4491



Training set no. 200, Experiment: AGP exp\_2

NEEYNK(=PEP)\_6\_5\_1\_1, m/z:1074.41(3+), RT:16.70, Y-score:92.33



Training set no. 201, Experiment: AGP exp\_1

NEEYNK(=PEP)\_6\_5\_1\_1, m/z:1074.41(3+), RT:16.66, Y-score:91.74



# Training set no. 202, Experiment: AGP exp\_1

NEEYNK(=PEP)\_6\_5\_1\_1, m/z:1074.41(3+), RT:16.15, Y-score:91.19

HCD Scan:1899



CID Scan:1898



# Training set no. 203, Experiment: AGP exp\_1

NEEYNK(=PEP)\_6\_5\_1\_1, m/z:1074.41(3+), RT:15.62, Y-score:89.57



# Training set no. 204, Experiment: AGP exp\_2

NEEYNK(=PEP)\_6\_5\_1\_1, m/z:1074.41(3+), RT:15.66, Y-score:82.33







# Training set no. 206, Experiment: AGP exp\_1

NEEYNK(=PEP)\_6\_5\_1\_2, m/z:1171.44(3+), RT:18.27, Y-score:90.85



Training set no. 207, Experiment: AGP exp\_1

NEEYNK(=PEP)\_6\_5\_1\_2, m/z:1171.44(3+), RT:20.43, Y-score:90.42



# Training set no. 208, Experiment: AGP exp\_2

NEEYNK(=PEP)\_6\_5\_1\_2, m/z:1171.44(3+), RT:19.17, Y-score:89.26



Training set no. 209, Experiment: AGP exp\_2

NEEYNK(=PEP)\_6\_5\_1\_2, m/z:1171.44(3+), RT:19.73, Y-score:88.71





# Training set no. 211, Experiment: AGP exp\_2

NEEYNK(=PEP)\_6\_5\_1\_2, m/z:1171.44(3+), RT:20.88, Y-score:83.44



# Training set no. 212, Experiment: AGP exp\_1

NEEYNK(=PEP)\_6\_5\_1\_3, m/z:1268.14(3+), RT:21.96, Y-score:90.35



Training set no. 213, Experiment: AGP exp\_2

NEEYNK(=PEP)\_6\_5\_1\_3, m/z:1268.14(3+), RT:22.12, Y-score:90.05





Training set no. 214, Experiment: AGP exp\_25

NEEYNK(=PEP)\_6\_5\_2\_2, m/z:1220.46(3+), RT:19.35, Y-score:92.74

HCD Scan:3986



CID Scan:3991



Training set no. 215, Experiment: AGP exp\_34

NEEYNK(=PEP)\_6\_5\_2\_2, m/z:1220.13(3+), RT:24.16, Y-score:89.71

HCD Scan:3652



CID Scan:3654



Training set no. 216, Experiment: AGP exp\_27

NEEYNK(=PEP)\_6\_5\_2\_2, m/z:1220.13(3+), RT:21.42, Y-score:89.13

HCD Scan:4316



CID Scan:4318



Training set no. 217, Experiment: AGP exp\_45

NEEYNK(=PEP)\_6\_5\_2\_2, m/z:1220.13(3+), RT:24.41, Y-score:88.34



Training set no. 218, Experiment: AGP exp\_9

NEEYNK(=PEP)\_6\_5\_2\_2, m/z:1220.13(3+), RT:20.16, Y-score:85.19



Training set no. 219, Experiment: AGP exp\_28

NEEYNK(=PEP)\_6\_5\_2\_2, m/z:1220.13(3+), RT:21.43, Y-score:85.04



# Training set no. 220, Experiment: AGP exp\_37

NEEYNK(=PEP)\_6\_5\_2\_2, m/z:1220.13(3+), RT:22.54, Y-score:80.84



# Training set no. 221, Experiment: AGP exp\_37

NEEYNK(=PEP)\_6\_5\_2\_3, m/z:1317.16(3+), RT:31.40, Y-score:90.91

HCD Scan:8935



CID Scan:8937





Training set no. 222, Experiment: AGP exp\_8

NEEYNK(=PEP)\_6\_5\_2\_3, m/z:1317.16(3+), RT:30.43, Y-score:90.60

HCD Scan:7427



CID Scan:7429





Training set no. 224, Experiment: AGP exp\_7

NEEYNK(=PEP)\_6\_5\_2\_3, m/z:1317.16(3+), RT:29.52, Y-score:90.20

HCD Scan:5918



CID Scan:5921



Training set no. 225, Experiment: AGP exp\_20

NEEYNK(=PEP)\_6\_5\_2\_3, m/z:1317.16(3+), RT:30.45, Y-score:90.09

HCD Scan:8452



CID Scan:8454





Training set no. 227, Experiment: AGP exp\_34

NEEYNK(=PEP)\_6\_5\_2\_3, m/z:1317.16(3+), RT:31.93, Y-score:89.33

HCD Scan:6965



CID Scan:6967



Training set no. 228, Experiment: AGP exp\_36

NEEYNK(=PEP)\_6\_5\_2\_3, m/z:1317.16(3+), RT:31.10, Y-score:89.11

HCD Scan:8718



CID Scan:8720



Training set no. 229, Experiment: AGP exp\_33

NEEYNK(=PEP)\_6\_5\_2\_3, m/z:1317.16(3+), RT:31.97, Y-score:89.04

HCD Scan:6960



CID Scan:6963





Training set no. 230, Experiment: AGP exp\_17

NEEYNK(=PEP)\_6\_5\_2\_3, m/z:1317.16(3+), RT:30.62, Y-score:88.98

HCD Scan:8291



CID Scan:8293



# Training set no. 231, Experiment: AGP exp\_9

NEEYNK(=PEP)\_6\_5\_2\_3, m/z:1317.16(3+), RT:30.62, Y-score:87.76

HCD Scan:7527



CID Scan:7529



Training set no. 232, Experiment: AGP exp\_42

NEEYNK(=PEP)\_6\_5\_2\_3, m/z:1317.16(3+), RT:31.55, Y-score:87.62

HCD Scan:8941



CID Scan:8943



Training set no. 233, Experiment: AGP exp\_28

NEEYNK(=PEP)\_6\_5\_2\_3, m/z:1317.16(3+), RT:31.66, Y-score:86.70

HCD Scan:8805



CID Scan:8807



# Training set no. 234, Experiment: AGP exp\_2

NEEYNK(=PEP)\_6\_5\_2\_3, m/z:1317.16(3+), RT:22.07, Y-score:86.24



Training set no. 235, Experiment: AGP exp\_28

NEEYNK(=PEP)\_6\_5\_2\_3, m/z:1315.77(3+), RT:31.30, Y-score:83.60

HCD Scan:8648



CID Scan:8651



Training set no. 236, Experiment: AGP exp\_15

NEEYNK(=PEP)\_6\_5\_2\_3, m/z:1317.16(3+), RT:37.28, Y-score:75.86

HCD Scan:9764



CID Scan:9766



# Training set no. 237, Experiment: AGP exp\_14

NEEYNK(=PEP)\_6\_5\_2\_3, m/z:1317.16(3+), RT:37.37, Y-score:75.15

HCD Scan:9917



CID Scan:9919





# Training set no. 238, Experiment: AGP exp\_16

NEEYNK(=PEP)\_6\_5\_2\_3, m/z:1317.16(3+), RT:37.30, Y-score:67.70



Training set no. 239, Experiment: AGP exp\_1

NEEYNK(=PEP)\_6\_5\_3\_1, m/z:1171.77(3+), RT:21.97, Y-score:86.97



Training set no. 240, Experiment: AGP exp\_1

SVQEIQATFFYFTPKN(=PEP)\_6\_5\_0\_3, m/z:1594.33(3+), RT:70.25, Y-score:77.47



# Training set no. 241, Experiment: AGP exp\_1

ENGTVSR(=PEP)\_5\_4\_0\_2, m/z:989.72(3+), RT:16.68, Y-score:72.93



# Training set no. 242, Experiment: AGP exp\_2

ENGTVSR(=PEP)\_6\_5\_0\_1, m/z:1014.40(3+), RT:15.50, Y-score:87.13



# Training set no. 243, Experiment: AGP exp\_1

ENGTVSR(=PEP)\_6\_5\_0\_2, m/z:1111.43(3+), RT:17.60, Y-score:94.58



Training set no. 244, Experiment: AGP exp\_2

ENGTVSR(=PEP)\_6\_5\_0\_2, m/z:1111.43(3+), RT:17.69, Y-score:93.49



Training set no. 245, Experiment: AGP exp\_1

ENGTVSR(=PEP)\_6\_5\_0\_2, m/z:1111.10(3+), RT:17.09, Y-score:92.03





# Training set no. 246, Experiment: AGP exp\_1

ENGTVSR(=PEP)\_6\_5\_0\_2, m/z:1111.09(3+), RT:18.11, Y-score:90.98

HCD Scan:2418



CID Scan:2417



Training set no. 247, Experiment: AGP exp\_2

ENGTVSR(=PEP)\_6\_5\_0\_3, m/z:1208.46(3+), RT:21.29, Y-score:90.22



Training set no. 248, Experiment: AGP exp\_1

ENGTVSR(=PEP)\_6\_5\_0\_3, m/z:1208.13(3+), RT:20.96, Y-score:90.16

HCD Scan:3872



CID Scan:3871



**Training set no. 249, Experiment: AGP exp\_1**

ENGTVSR(=PEP)\_6\_5\_0\_3, m/z:1208.47(3+), RT:21.49, Y-score:86.19

HCD Scan:4150



CID Scan:4149



Training set no. 250, Experiment: AGP exp\_2

ENGTVSR(=PEP)\_6\_5\_1\_1, m/z:1063.09(3+), RT:15.39, Y-score:82.15



# Training set no. 251, Experiment: AGP exp\_2

ENGTVSR(=PEP)\_6\_5\_1\_2, m/z:1159.79(3+), RT:18.00, Y-score:89.09



# Training set no. 252, Experiment: AGP exp\_1

ENGTVSR(=PEP)\_6\_5\_1\_2, m/z:1160.12(3+), RT:17.52, Y-score:82.00



Training set no. 253, Experiment: AGP exp\_2

ENGTVSR(=PEP)\_6\_5\_1\_3, m/z:1257.15(3+), RT:20.99, Y-score:89.77





# Training set no. 254, Experiment: AGP exp\_1

ENGTVSR(=PEP)\_6\_5\_1\_3, m/z:1257.15(3+), RT:20.76, Y-score:88.80



# Training set no. 255, Experiment: AGP exp\_1

ENGTVSR(=PEP)\_6\_5\_1\_3, m/z:1256.82(3+), RT:21.28, Y-score:78.08

HCD Scan:4043



CID Scan:4042



Training set no. 256, Experiment: AGP exp\_28

ENGTVSR(=PEP)\_6\_5\_2\_3, m/z:1305.84(3+), RT:26.94, Y-score:92.58

HCD Scan:6949



CID Scan:6954



Training set no. 257, Experiment: AGP exp\_26

ENGTVSR(=PEP)\_6\_5\_2\_3, m/z:1305.84(3+), RT:26.76, Y-score:91.79

HCD Scan:7044



CID Scan:7051



Training set no. 258, Experiment: AGP exp\_36

ENGTVSR(=PEP)\_6\_5\_2\_3, m/z:1305.84(3+), RT:27.16, Y-score:91.27

HCD Scan:7095



CID Scan:7102



Training set no. 259, Experiment: AGP exp\_27

ENGTVSR(=PEP)\_6\_5\_2\_3, m/z:1305.84(3+), RT:26.80, Y-score:88.57

HCD Scan:6627



CID Scan:6629



Training set no. 260, Experiment: AGP exp\_22

ENGTVSR(=PEP)\_6\_5\_2\_3, m/z:1305.84(3+), RT:26.19, Y-score:87.72

HCD Scan:6651



CID Scan:6653



# Training set no. 261, Experiment: AGP exp\_14

ENGTVSR(=PEP)\_6\_5\_2\_3, m/z:1305.84(3+), RT:30.01, Y-score:83.96

HCD Scan:7627



CID Scan:7628





Training set no. 262, Experiment: AGP exp\_5

ENGTVSR(=PEP)\_6\_5\_2\_3, m/z:1305.84(3+), RT:28.86, Y-score:83.01



# Training set no. 263, Experiment: AGP exp\_2

ENGTVSR(=PEP)\_7\_6\_1\_1, m/z:1184.80(3+), RT:14.90, Y-score:89.96



# Training set no. 264, Experiment: AGP exp\_1

ENGTVSR(=PEP)\_7\_6\_1\_2, m/z:1281.83(3+), RT:16.51, Y-score:91.29



Training set no. 265, Experiment: AGP exp\_2

ENGTVSR(=PEP)\_7\_6\_1\_2, m/z:1281.83(3+), RT:16.67, Y-score:90.75



Training set no. 266, Experiment: AGP exp\_1

ENGTVSR(=PEP)\_7\_6\_1\_2, m/z:1281.83(3+), RT:17.01, Y-score:89.66



Training set no. 267, Experiment: AGP exp\_2

ENGTVSR(=PEP)\_7\_6\_1\_4, m/z:1107.17(4+), RT:23.06, Y-score:82.44



**Training set no. 268, Experiment: AGP exp\_1**

ENGTVSR(=PEP)\_7\_6\_1\_4, m/z:1106.92(4+), RT:23.22, Y-score:80.37

HCD Scan:5113



CID Scan:5112



Training set no. 269, Experiment: AGP exp\_1

LVPVPITNATLDR(=PEP)\_3\_3\_0\_0, m/z:1252.61(2+), RT:42.40, Y-score:76.61





Training set no. 270, Experiment: AGP exp\_2

LVPVPITNATLDR(=PEP)\_3\_3\_0\_0, m/z:1252.11(2+), RT:42.85, Y-score:76.39



# Training set no. 271, Experiment: AGP exp\_2

LVPVPITNATLDR(=PEP)\_3\_3\_0\_0, m/z:1252.61(2+), RT:42.99, Y-score:75.33



# Training set no. 272, Experiment: AGP exp\_1

LVPVPITNATLDR(=PEP)\_3\_3\_0\_0, m/z:1252.61(2+), RT:42.54, Y-score:74.82



# Training set no. 273, Experiment: AGP exp\_2

LVPVPITNATLDR(=PEP)\_4\_4\_0\_1, m/z:1054.16(3+), RT:37.23, Y-score:80.74



# Training set no. 274, Experiment: AGP exp\_1

LVPVPITNATLDR(=PEP)\_5\_4\_0\_1, m/z:1661.75(2+), RT:42.47, Y-score:86.58



Training set no. 275, Experiment: AGP exp\_2

LVPVPITNATLDR(=PEP)\_5\_4\_0\_1, m/z:1661.75(2+), RT:43.11, Y-score:84.27



# Training set no. 276, Experiment: AGP exp\_2

LVPVPITNATLDR(=PEP)\_5\_4\_0\_1, m/z:1108.17(3+), RT:42.84, Y-score:79.52

HCD Scan:15350



CID Scan:15349



Training set no. 277, Experiment: AGP exp\_2

LVPVPITNATLDR(=PEP)\_5\_4\_0\_1, m/z:831.38(4+), RT:36.89, Y-score:76.90





Training set no. 278, Experiment: AGP exp\_1

LVPVPITNATLDR(=PEP)\_5\_4\_0\_2, m/z:1205.20(3+), RT:43.68, Y-score:91.18



Training set no. 279, Experiment: AGP exp\_2

LVPVPITNATLDR(=PEP)\_5\_4\_0\_2, m/z:1807.30(2+), RT:43.28, Y-score:87.32



# Training set no. 280, Experiment: AGP exp\_1

LVPVPITNATLDR(=PEP)\_5\_4\_0\_2, m/z:904.16(4+), RT:43.06, Y-score:81.61



# Training set no. 281, Experiment: AGP exp\_1

LVPVPITNATLDR(=PEP)\_5\_4\_1\_2, m/z:1253.89(3+), RT:43.12, Y-score:77.44



# Training set no. 282, Experiment: AGP exp\_2

LVPVPITNATLDR(=PEP)\_5\_4\_1\_2, m/z:1253.89(3+), RT:43.18, Y-score:74.07



Training set no. 283, Experiment: AGP exp\_2

LVPVPITNATLDR(=PEP)\_5\_5\_0\_1, m/z:1175.86(3+), RT:37.06, Y-score:87.48

HCD Scan:12154



CID Scan:12153



# Training set no. 284, Experiment: AGP exp\_1

LVPVPITNATLDR(=PEP)\_5\_5\_0\_1, m/z:1175.86(3+), RT:36.44, Y-score:86.42



Training set no. 285, Experiment: AGP exp\_1

LVPVPITNATLDR(=PEP)\_5\_5\_0\_1, m/z:1175.86(3+), RT:36.98, Y-score:86.13





# Training set no. 286, Experiment: AGP exp\_2

LVPVPITNATLDR(=PEP)\_5\_5\_0\_2, m/z:1272.89(3+), RT:43.47, Y-score:88.83



# Training set no. 287, Experiment: AGP exp\_2

LVPVPITNATLDR(=PEP)\_6\_5\_0\_1, m/z:1229.54(3+), RT:36.98, Y-score:91.79





Training set no. 289, Experiment: AGP exp\_1

LVPVPITNATLDR(=PEP)\_6\_5\_0\_1, m/z:922.66(4+), RT:36.55, Y-score:87.64



# Training set no. 290, Experiment: AGP exp\_1

LVPVPITNATLDR(=PEP)\_6\_5\_0\_2, m/z:1989.86(2+), RT:42.46, Y-score:94.83



Training set no. 291, Experiment: AGP exp\_1

LVPVPITNATLDR(=PEP)\_6\_5\_0\_2, m/z:995.44(4+), RT:42.92, Y-score:86.69



Training set no. 292, Experiment: AGP exp\_2

LVPVPITNATLDR(=PEP)\_6\_5\_0\_2, m/z:995.44(4+), RT:43.04, Y-score:85.93



Training set no. 293, Experiment: AGP exp\_1

LVPVPITNATLDR(=PEP)\_6\_5\_0\_2, m/z:995.44(4+), RT:42.26, Y-score:84.58





# Training set no. 294, Experiment: AGP exp\_2

LVPVPITNATLDR(=PEP)\_6\_5\_0\_2, m/z:995.44(4+), RT:42.46, Y-score:83.04



Training set no. 295, Experiment: AGP exp\_1

LVPVPITNATLDR(=PEP)\_6\_5\_0\_3, m/z:1068.21(4+), RT:49.64, Y-score:84.82

HCD Scan:18289



CID Scan:18288



# Training set no. 296, Experiment: AGP exp\_1

LVPVPITNATLDR(=PEP)\_6\_5\_0\_3, m/z:1068.22(4+), RT:50.22, Y-score:84.54

HCD Scan:18624



CID Scan:18623



Training set no. 297, Experiment: AGP exp\_2

LVPVPITNATLDR(=PEP)\_6\_5\_0\_3, m/z:1068.21(4+), RT:50.33, Y-score:84.38



Training set no. 298, Experiment: AGP exp\_2

LVPVPITNATLDR(=PEP)\_6\_5\_0\_3, m/z:1068.21(4+), RT:50.89, Y-score:84.17



# Training set no. 299, Experiment: AGP exp\_2

LVPVPITNATLDR(=PEP)\_6\_5\_0\_3, m/z:1067.96(4+), RT:49.67, Y-score:84.11





Training set no. 301, Experiment: AGP exp\_1

LVPVPITNATLDR(=PEP)\_6\_5\_1\_1, m/z:1278.57(3+), RT:36.17, Y-score:89.33





Training set no. 302, Experiment: AGP exp\_1

LVPVPITNATLDR(=PEP)\_6\_5\_1\_2, m/z:1375.60(3+), RT:42.44, Y-score:90.84



Training set no. 303, Experiment: AGP exp\_2

LVPVPITNATLDR(=PEP)\_6\_5\_1\_2, m/z:1375.60(3+), RT:42.66, Y-score:90.41



Training set no. 304, Experiment: AGP exp\_1

LVPVPITNATLDR(=PEP)\_6\_5\_1\_2, m/z:1375.93(3+), RT:43.03, Y-score:90.37



Training set no. 305, Experiment: AGP exp\_2

LVPVPITNATLDR(=PEP)\_6\_5\_1\_2, m/z:1375.60(3+), RT:43.22, Y-score:89.66



Training set no. 306, Experiment: AGP exp\_2

LVPVPITNATLDR(=PEP)\_6\_5\_1\_2, m/z:1375.60(3+), RT:42.03, Y-score:85.14



# Training set no. 307, Experiment: AGP exp\_1

LVPVPITNATLDR(=PEP)\_6\_5\_1\_2, m/z:1031.95(4+), RT:42.63, Y-score:82.43

HCD Scan:14783



CID Scan:14782



Training set no. 308, Experiment: AGP exp\_2

LVPVPITNATLDR(=PEP)\_6\_5\_1\_2, m/z:1031.95(4+), RT:42.74, Y-score:79.16



Training set no. 309, Experiment: AGP exp\_1

LVPVPITNATLDR(=PEP)\_6\_5\_1\_2, m/z:1031.95(4+), RT:42.02, Y-score:67.80





# Training set no. 310, Experiment: AGP exp\_1

LVPVPITNATLDR(=PEP)\_6\_5\_1\_2, m/z:1031.95(4+), RT:42.03, Y-score:67.45

HCD Scan:14442



CID Scan:14441



Training set no. 311, Experiment: AGP exp\_1

LVPVPITNATLDR(=PEP)\_6\_5\_1\_3, m/z:1472.63(3+), RT:49.89, Y-score:89.54



Training set no. 312, Experiment: AGP exp\_1

LVPVPITNATLDR(=PEP)\_6\_5\_1\_3, m/z:1104.73(4+), RT:50.10, Y-score:78.63



# Training set no. 313, Experiment: AGP exp\_2

LVPVPITNATLDR(=PEP)\_6\_5\_1\_3, m/z:1104.72(4+), RT:50.14, Y-score:77.19



# Training set no. 314, Experiment: IgG exp\_4

EEQYNSTYR(=PEP)\_3\_3\_0\_0, m/z:1142.96(2+), RT:21.05, Y-score:84.41



Training set no. 315, Experiment: IgG exp\_3

EEQYNSTYR(=PEP)\_3\_3\_1\_0, m/z:1215.98(2+), RT:23.25, Y-score:88.67



Training set no. 316, Experiment: IgG exp\_1

EEQYNSTYR(=PEP)\_3\_3\_1\_0, m/z:1215.99(2+), RT:22.10, Y-score:88.30







Training set no. 318, Experiment: IgG exp\_2

EEQYNSTYR(=PEP)\_3\_3\_1\_0, m/z:1215.99(2+), RT:23.79, Y-score:84.67



# Training set no. 319, Experiment: IgG exp\_4

EEQYNSTYR(=PEP)\_3\_4\_0\_0, m/z:1244.50(2+), RT:21.01, Y-score:88.76

HCD Scan:5329



CID Scan:5328



# Training set no. 320, Experiment: IgG exp\_3

EEQYNSTYR(=PEP)\_3\_4\_0\_0, m/z:1244.49(2+), RT:23.32, Y-score:87.76

HCD Scan:4223



CID Scan:4222



# Training set no. 321, Experiment: IgG exp\_1

EEQYNSTYR(=PEP)\_3\_4\_0\_0, m/z:1244.50(2+), RT:22.28, Y-score:86.45

HCD Scan:3127



CID Scan:3126



# Training set no. 322, Experiment: IgG exp\_3

EEQYNSTYR(=PEP)\_3\_4\_1\_0, m/z:1317.53(2+), RT:23.09, Y-score:89.03

HCD Scan:4092



CID Scan:4091





Training set no. 324, Experiment: IgG exp\_4

EEQYNSTYR(=PEP)\_3\_4\_1\_0, m/z:1317.52(2+), RT:20.76, Y-score:88.44

HCD Scan:5188



CID Scan:5187



Training set no. 325, Experiment: IgG exp\_2

EEQYNSTYR(=PEP)\_3\_4\_1\_0, m/z:1317.53(2+), RT:23.75, Y-score:88.34

HCD Scan:2998



CID Scan:2997





Training set no. 326, Experiment: IgG exp\_1

EEQYNSTYR(=PEP)\_3\_4\_1\_0, m/z:1317.53(2+), RT:21.95, Y-score:83.86

HCD Scan:2938



CID Scan:2937









# Training set no. 330, Experiment: IgG exp\_1

EEQYNSTYR(=PEP)\_3\_5\_1\_0, m/z:1419.07(2+), RT:22.32, Y-score:81.08

HCD Scan:3154



CID Scan:3153



Training set no. 331, Experiment: IgG exp\_1

EEQYNSTYR(=PEP)\_4\_3\_1\_0, m/z:1297.02(2+), RT:22.08, Y-score:88.70



Training set no. 332, Experiment: IgG exp\_4

EEQYNSTYR(=PEP)\_4\_3\_1\_0, m/z:1297.01(2+), RT:20.96, Y-score:88.06



Training set no. 333, Experiment: IgG exp\_3

EEQYNSTYR(=PEP)\_4\_3\_1\_0, m/z:1297.01(2+), RT:23.23, Y-score:87.86





# Training set no. 334, Experiment: IgG exp\_3

EEQYNSTYR(=PEP)\_4\_4\_0\_0, m/z:1325.52(2+), RT:23.28, Y-score:87.85



# Training set no. 335, Experiment: IgG exp\_1

EEQYNSTYR(=PEP)\_4\_4\_0\_0, m/z:1325.53(2+), RT:22.17, Y-score:87.84





Training set no. 337, Experiment: IgG exp\_4

EEQYNSTYR(=PEP)\_4\_4\_1\_0, m/z:1398.55(2+), RT:20.75, Y-score:85.18



Training set no. 338, Experiment: IgG exp\_2

EEQYNSTYR(=PEP)\_4\_4\_1\_0, m/z:1398.56(2+), RT:23.83, Y-score:84.36



Training set no. 339, Experiment: IgG exp\_3

EEQYNSTYR(=PEP)\_4\_4\_1\_0, m/z:1398.55(2+), RT:23.64, Y-score:84.35



Training set no. 340, Experiment: IgG exp\_1

EEQYNSTYR(=PEP)\_4\_4\_1\_0, m/z:1398.55(2+), RT:21.88, Y-score:84.25



Training set no. 341, Experiment: IgG exp\_3

EEQYNSTYR(=PEP)\_4\_4\_1\_0, m/z:1398.55(2+), RT:23.07, Y-score:84.18





# Training set no. 342, Experiment: IgG exp\_1

EEQYNSTYR(=PEP)\_4\_4\_1\_0, m/z:1398.55(2+), RT:22.54, Y-score:83.56



### Training set no. 343, Experiment: IgG exp\_2

EEQYNSTYR(=PEP)\_4\_4\_1\_0, m/z:1398.55(2+), RT:29.13, Y-score:78.74



Training set no. 344, Experiment: IgG exp\_3

EEQYNSTYR(=PEP)\_4\_4\_1\_1, m/z:1029.74(3+), RT:25.42, Y-score:94.45

HCD Scan:5171



CID Scan:5170



Training set no. 345, Experiment: IgG exp\_4

EEQYNSTYR(=PEP)\_4\_4\_1\_1, m/z:1029.74(3+), RT:22.38, Y-score:92.54

HCD Scan:6143



CID Scan:6142



Training set no. 346, Experiment: IgG exp\_1

EEQYNSTYR(=PEP)\_4\_4\_1\_1, m/z:1029.74(3+), RT:23.40, Y-score:89.33

HCD Scan:3788



CID Scan:3787



Training set no. 347, Experiment: IgG exp\_3

EEQYNSTYR(=PEP)\_4\_4\_1\_1, m/z:1544.10(2+), RT:25.46, Y-score:84.75

HCD Scan:5196



CID Scan:5195



Training set no. 348, Experiment: IgG exp\_1

EEQYNSTYR(=PEP)\_4\_4\_1\_1, m/z:1544.10(2+), RT:23.38, Y-score:82.19

HCD Scan:3775



CID Scan:3774



Training set no. 349, Experiment: IgG exp\_4

EEQYNSTYR(=PEP)\_4\_4\_1\_1, m/z:1544.10(2+), RT:22.39, Y-score:82.11

HCD Scan:6151



CID Scan:6150





Training set no. 350, Experiment: IgG exp\_2

EEQYNSTYR(=PEP)\_4\_4\_1\_1, m/z:1029.74(3+), RT:24.13, Y-score:71.94



# Training set no. 351, Experiment: IgG exp\_2

EEQYNSTYR(=PEP)\_4\_4\_1\_1, m/z:1544.10(2+), RT:24.14, Y-score:67.77

HCD Scan:3227



CID Scan:3226



# Training set no. 352, Experiment: IgG exp\_1

EEQYNSTYR(=PEP)\_4\_5\_1\_0, m/z:1500.09(2+), RT:22.23, Y-score:83.51



Training set no. 353, Experiment: IgG exp\_4

EEQYNSTYR(=PEP)\_4\_5\_1\_0, m/z:1500.09(2+), RT:21.18, Y-score:83.47



Training set no. 354, Experiment: IgG exp\_3

EEQYNSTYR(=PEP)\_4\_5\_1\_0, m/z:1500.09(2+), RT:24.63, Y-score:82.93



Training set no. 355, Experiment: IgG exp\_2

EEQYNSTYR(=PEP)\_4\_5\_1\_0, m/z:1500.10(2+), RT:23.84, Y-score:75.90



Training set no. 356, Experiment: IgG exp\_4

EEQYNSTYR(=PEP)\_5\_4\_0\_0, m/z:1406.55(2+), RT:20.95, Y-score:87.59



Training set no. 357, Experiment: IgG exp\_3

EEQYNSTYR(=PEP)\_5\_4\_0\_0, m/z:1407.05(2+), RT:23.28, Y-score:85.12





Training set no. 358, Experiment: IgG exp\_3

EEQYNSTYR(=PEP)\_5\_4\_0\_1, m/z:1552.10(2+), RT:25.57, Y-score:88.12



Training set no. 359, Experiment: IgG exp\_1

EEQYNSTYR(=PEP)\_5\_4\_1\_0, m/z:1479.58(2+), RT:21.85, Y-score:89.62



Training set no. 360, Experiment: IgG exp\_3

EEQYNSTYR(=PEP)\_5\_4\_1\_0, m/z:1479.58(2+), RT:23.08, Y-score:88.56



Training set no. 361, Experiment: IgG exp\_2

EEQYNSTYR(=PEP)\_5\_4\_1\_0, m/z:1480.08(2+), RT:23.76, Y-score:85.29



Training set no. 362, Experiment: IgG exp\_4

EEQYNSTYR(=PEP)\_5\_4\_1\_0, m/z:1479.58(2+), RT:20.75, Y-score:83.96



Training set no. 363, Experiment: IgG exp\_3

EEQYNSTYR(=PEP)\_5\_4\_1\_0, m/z:1479.58(2+), RT:23.64, Y-score:83.27



# Training set no. 364, Experiment: IgG exp\_3

EEQYNSTYR(=PEP)\_5\_4\_1\_1, m/z:1083.76(3+), RT:25.31, Y-score:92.47



Training set no. 365, Experiment: IgG exp\_1

EEQYNSTYR(=PEP)\_5\_4\_1\_1, m/z:1083.76(3+), RT:23.20, Y-score:92.23





# Training set no. 366, Experiment: IgG exp\_4

EEQYNSTYR(=PEP)\_5\_4\_1\_1, m/z:1083.75(3+), RT:22.32, Y-score:92.15



Training set no. 367, Experiment: IgG exp\_3

EEQYNSTYR(=PEP)\_5\_4\_1\_1, m/z:1625.13(2+), RT:25.32, Y-score:89.58



Training set no. 368, Experiment: IgG exp\_4

EEQYNSTYR(=PEP)\_5\_4\_1\_1, m/z:1625.13(2+), RT:22.32, Y-score:89.36



# Training set no. 369, Experiment: IgG exp\_1

EEQYNSTYR(=PEP)\_5\_4\_1\_1, m/z:1625.13(2+), RT:23.24, Y-score:88.89



Training set no. 370, Experiment: IgG exp\_2

EEQYNSTYR(=PEP)\_5\_4\_1\_1, m/z:1625.13(2+), RT:24.12, Y-score:83.96



Training set no. 371, Experiment: IgG exp\_4

EEQYNSTYR(=PEP)\_5\_5\_1\_0, m/z:1581.12(2+), RT:21.21, Y-score:77.48



Training set no. 372, Experiment: IgG exp\_4

EEQFNSTFR(=PEP)\_3\_3\_1\_0, m/z:1199.99(2+), RT:24.16, Y-score:89.03



Training set no. 373, Experiment: IgG exp\_1

EEQFNSTFR(=PEP)\_3\_3\_1\_0, m/z:1199.99(2+), RT:24.51, Y-score:88.12





Training set no. 374, Experiment: IgG exp\_3

EEQFNSTFR(=PEP)\_3\_3\_1\_0, m/z:1199.99(2+), RT:26.39, Y-score:87.48

HCD Scan:5742



CID Scan:5741



Training set no. 375, Experiment: IgG exp\_2

EEQFNSTFR(=PEP)\_3\_3\_1\_0, m/z:1199.99(2+), RT:24.62, Y-score:86.83



**Training set no. 376, Experiment: IgG exp\_3**

EEQFNSTFR(=PEP)\_3\_4\_0\_0, m/z:1228.50(2+), RT:26.52, Y-score:87.50

HCD Scan:5817



CID Scan:5816



# Training set no. 377, Experiment: IgG exp\_4

EEQFNSTFR(=PEP)\_3\_4\_0\_0, m/z:1228.51(2+), RT:24.37, Y-score:87.47

HCD Scan:7314



CID Scan:7313



# Training set no. 378, Experiment: IgG exp\_1

EEQFNSTFR(=PEP)\_3\_4\_0\_0, m/z:1228.50(2+), RT:24.71, Y-score:85.68

HCD Scan:4558



CID Scan:4557





# Training set no. 380, Experiment: IgG exp\_2

EEQFNSTFR(=PEP)\_3\_4\_1\_0, m/z:1301.53(2+), RT:24.56, Y-score:88.91

HCD Scan:3470



CID Scan:3469



Training set no. 381, Experiment: IgG exp\_3

EEQFNSTFR(=PEP)\_3\_4\_1\_0, m/z:1301.53(2+), RT:26.35, Y-score:88.70

HCD Scan:5722



CID Scan:5721





# Training set no. 382, Experiment: IgG exp\_4

EEQFNSTFR(=PEP)\_3\_4\_1\_0, m/z:1301.53(2+), RT:24.66, Y-score:88.33

HCD Scan:7481



CID Scan:7480



Training set no. 383, Experiment: IgG exp\_1

EEQFNSTFR(=PEP)\_3\_4\_1\_0, m/z:1301.53(2+), RT:24.89, Y-score:88.27

HCD Scan:4662



CID Scan:4661



Training set no. 384, Experiment: IgG exp\_3

EEQFNSTFR(=PEP)\_3\_4\_1\_0, m/z:1301.53(2+), RT:26.95, Y-score:88.21

HCD Scan:6074



CID Scan:6073



Training set no. 385, Experiment: IgG exp\_4

EEQFNSTFR(=PEP)\_3\_4\_1\_0, m/z:1301.53(2+), RT:23.80, Y-score:86.50

HCD Scan:6976



CID Scan:6975







# Training set no. 388, Experiment: IgG exp\_2

EEQFNSTFR(=PEP)\_3\_5\_1\_0, m/z:935.72(3+), RT:24.60, Y-score:86.22

HCD Scan:3497



CID Scan:3496









Training set no. 391, Experiment: IgG exp\_3

EEQFNSTFR(=PEP)\_3\_5\_1\_0, m/z:1403.07(2+), RT:26.43, Y-score:82.82

HCD Scan:5767



CID Scan:5766



# Training set no. 392, Experiment: IgG exp\_1

EEQFNSTFR(=PEP)\_3\_5\_1\_0, m/z:1403.07(2+), RT:24.65, Y-score:82.82

HCD Scan:4521



CID Scan:4520



Training set no. 393, Experiment: IgG exp\_4

EEQFNSTFR(=PEP)\_4\_3\_1\_0, m/z:1281.02(2+), RT:24.22, Y-score:86.96



Training set no. 394, Experiment: IgG exp\_4

EEQFNSTFR(=PEP)\_4\_4\_0\_0, m/z:1309.53(2+), RT:24.31, Y-score:86.42



Training set no. 395, Experiment: IgG exp\_4

EEQFNSTFR(=PEP)\_4\_4\_1\_0, m/z:922.04(3+), RT:24.30, Y-score:98.03



Training set no. 396, Experiment: IgG exp\_1

EEQFNSTFR(=PEP)\_4\_4\_1\_0, m/z:922.04(3+), RT:24.49, Y-score:97.76



Training set no. 397, Experiment: IgG exp\_3

EEQFNSTFR(=PEP)\_4\_4\_1\_0, m/z:922.04(3+), RT:26.31, Y-score:97.00





# Training set no. 398, Experiment: IgG exp\_2

EEQFNSTFR(=PEP)\_4\_4\_1\_0, m/z:922.04(3+), RT:24.55, Y-score:95.10



Training set no. 399, Experiment: IgG exp\_4

EEQFNSTFR(=PEP)\_4\_4\_1\_0, m/z:1382.56(2+), RT:23.72, Y-score:90.21



Training set no. 400, Experiment: IgG exp\_3

EEQFNSTFR(=PEP)\_4\_4\_1\_0, m/z:1382.55(2+), RT:26.30, Y-score:88.76



Training set no. 401, Experiment: IgG exp\_2

EEQFNSTFR(=PEP)\_4\_4\_1\_0, m/z:1382.56(2+), RT:29.67, Y-score:88.69



Training set no. 402, Experiment: IgG exp\_4

EEQFNSTFR(=PEP)\_4\_4\_1\_0, m/z:1382.56(2+), RT:24.30, Y-score:88.69



Training set no. 403, Experiment: IgG exp\_2

EEQFNSTFR(=PEP)\_4\_4\_1\_0, m/z:1382.56(2+), RT:24.43, Y-score:87.65



Training set no. 404, Experiment: IgG exp\_1

EEQFNSTFR(=PEP)\_4\_4\_1\_0, m/z:1382.56(2+), RT:24.98, Y-score:86.20



Training set no. 405, Experiment: IgG exp\_1

EEQFNSTFR(=PEP)\_4\_4\_1\_0, m/z:1382.56(2+), RT:25.65, Y-score:82.48





Training set no. 406, Experiment: IgG exp\_4

EEQFNSTFR(=PEP)\_4\_4\_1\_0, m/z:1382.56(2+), RT:24.90, Y-score:78.21



Training set no. 407, Experiment: IgG exp\_1

EEQFNSTFR(=PEP)\_4\_4\_1\_1, m/z:1019.07(3+), RT:27.29, Y-score:92.94

HCD Scan:6086



CID Scan:6085



Training set no. 408, Experiment: IgG exp\_2

EEQFNSTFR(=PEP)\_4\_4\_1\_1, m/z:1019.07(3+), RT:27.29, Y-score:92.34

HCD Scan:5076



CID Scan:5075



# Training set no. 409, Experiment: IgG exp\_2

EEQFNSTFR(=PEP)\_4\_4\_1\_1, m/z:1528.61(2+), RT:26.77, Y-score:88.90

HCD Scan:4773



CID Scan:4772



# Training set no. 410, Experiment: IgG exp\_1

EEQFNSTFR(=PEP)\_4\_4\_1\_1, m/z:1528.11(2+), RT:27.29, Y-score:88.89

HCD Scan:6084



CID Scan:6083



**Training set no. 411, Experiment: IgG exp\_2**

EEQFNSTFR(=PEP)\_4\_4\_1\_1, m/z:1019.07(3+), RT:26.72, Y-score:84.96

HCD Scan:4746



CID Scan:4745



# Training set no. 412, Experiment: IgG exp\_2

EEQFNSTFR(=PEP)\_4\_4\_1\_1, m/z:1528.11(2+), RT:27.35, Y-score:80.44

HCD Scan:5111



CID Scan:5110



Training set no. 413, Experiment: IgG exp\_4

EEQFNSTFR(=PEP)\_4\_4\_1\_1, m/z:1528.10(2+), RT:26.76, Y-score:77.33

HCD Scan:8722



CID Scan:8721





Training set no. 414, Experiment: IgG exp\_1

EEQFNSTFR(=PEP)\_4\_5\_1\_0, m/z:1484.10(2+), RT:24.56, Y-score:83.28



# Training set no. 415, Experiment: IgG exp\_3

EEQFNSTFR(=PEP)\_4\_5\_1\_0, m/z:1484.10(2+), RT:26.39, Y-score:83.16



# Training set no. 416, Experiment: IgG exp\_4

EEQFNSTFR(=PEP)\_4\_5\_1\_0, m/z:1484.10(2+), RT:24.28, Y-score:82.93



Training set no. 417, Experiment: IgG exp\_2

EEQFNSTFR(=PEP)\_4\_5\_1\_0, m/z:1484.10(2+), RT:24.63, Y-score:80.79



# Training set no. 418, Experiment: IgG exp\_4

EEQFNSTFR(=PEP)\_5\_4\_0\_0, m/z:1390.56(2+), RT:24.24, Y-score:63.21



Training set no. 419, Experiment: IgG exp\_4

EEQFNSTFR(=PEP)\_5\_4\_1\_0, m/z:1463.59(2+), RT:24.21, Y-score:89.50



Training set no. 420, Experiment: IgG exp\_3

EEQFNSTFR(=PEP)\_5\_4\_1\_0, m/z:1463.58(2+), RT:26.27, Y-score:88.68



Training set no. 421, Experiment: IgG exp\_1

EEQFNSTFR(=PEP)\_5\_4\_1\_0, m/z:1463.59(2+), RT:24.40, Y-score:88.21





Training set no. 422, Experiment: IgG exp\_2

EEQFNSTFR(=PEP)\_5\_4\_1\_0, m/z:1463.58(2+), RT:24.50, Y-score:88.14



Training set no. 423, Experiment: IgG exp\_4

EEQFNSTFR(=PEP)\_5\_4\_1\_1, m/z:1609.13(2+), RT:26.67, Y-score:92.37



Training set no. 424, Experiment: IgG exp\_1

EEQFNSTFR(=PEP)\_5\_4\_1\_1, m/z:1609.13(2+), RT:27.05, Y-score:90.76





# Training set no. 426, Experiment: IgG exp\_2

EEQFNSTFR(=PEP)\_5\_4\_1\_1, m/z:1609.14(2+), RT:26.38, Y-score:89.27



Training set no. 427, Experiment: IgG exp\_1

EEQFNSTFR(=PEP)\_5\_5\_1\_0, m/z:1043.75(3+), RT:24.52, Y-score:95.34



Training set no. 428, Experiment: IgG exp\_1

EEQFNSTFR(=PEP)\_5\_5\_1\_0, m/z:1565.13(2+), RT:24.56, Y-score:69.35



Training set no. 429, Experiment: IgG exp\_3

EEQYNSTFR(=PEP)\_4\_4\_1\_0, m/z:1390.56(2+), RT:25.33, Y-score:88.90





Training set no. 430, Experiment: IgG exp\_3

EEQFNSTYR(=PEP)\_3\_4\_1\_0, m/z:1309.53(2+), RT:25.35, Y-score:89.31

HCD Scan:5131



CID Scan:5130



Training set no. 431, Experiment: IgG exp\_1

EEQFNSTYR(=PEP)\_3\_4\_1\_0, m/z:1309.53(2+), RT:23.32, Y-score:88.19

HCD Scan:3740



CID Scan:3739





Training set no. 433, Experiment: IgG exp\_1

EEQFNSTYR(=PEP)\_4\_4\_1\_0, m/z:1390.56(2+), RT:23.27, Y-score:87.86



**Supplementary Figure 3.** MS/MS spectra of N-glycopeptides identified from alpha-1-acid glycoprotein and immunoglobulin gamma for test set.

**Test set no. 1, Experiment: AGP exp\_3**

ENGTISR(=PEP)\_4\_4\_0\_1, m/z:1264.51(2+), RT:16.69, Y-score:82.52

HCD Scan:2235



CID Scan:2234



# Test set no. 2, Experiment: AGP exp\_4

ENGTISR(=PEP)\_4\_4\_0\_1, m/z:1264.51(2+), RT:16.65, Y-score:80.40



Test set no. 3, Experiment: AGP exp\_3

ENGTISR(=PEP)\_5\_4\_0\_2, m/z:994.39(3+), RT:20.45, Y-score:89.73



# Test set no. 4, Experiment: AGP exp\_4

ENGTISR(=PEP)\_5\_4\_0\_2, m/z:1491.08(2+), RT:20.51, Y-score:85.93

HCD Scan:3701



CID Scan:3700





# Test set no. 5, Experiment: AGP exp\_3

ENGTISR(=PEP)\_5\_4\_0\_2, m/z:1491.08(2+), RT:20.56, Y-score:84.43

HCD Scan:3871



CID Scan:3870



Test set no. 6, Experiment: AGP exp\_4

ENGTISR(=PEP)\_6\_5\_0\_1, m/z:1019.07(3+), RT:16.87, Y-score:93.74



**Test set no. 7, Experiment: AGP exp\_3**

ENGTISR(=PEP)\_6\_5\_0\_1, m/z:1019.07(3+), RT:17.88, Y-score:93.50



# Test set no. 8, Experiment: AGP exp\_4

ENGTISR(=PEP)\_6\_5\_0\_1, m/z:1019.07(3+), RT:17.89, Y-score:91.98



Test set no. 9, Experiment: AGP exp\_3

ENGTISR(=PEP)\_6\_5\_0\_2, m/z:1116.10(3+), RT:20.68, Y-score:94.68



Test set no. 10, Experiment: AGP exp\_3

ENGTISR(=PEP)\_6\_5\_0\_2, m/z:1116.11(3+), RT:21.26, Y-score:93.80



# Test set no. 11, Experiment: AGP exp\_4

ENGTISR(=PEP)\_6\_5\_0\_2, m/z:1116.11(3+), RT:20.96, Y-score:91.96

### HCD Scan:3952



### CID Scan:3951



# Test set no. 12, Experiment: AGP exp\_3

ENGTISR(=PEP)\_6\_5\_0\_2, m/z:1673.65(2+), RT:20.91, Y-score:88.57

HCD Scan:4071



CID Scan:4070





**Test set no. 13, Experiment: AGP exp\_4**

ENGTISR(=PEP)\_6\_5\_0\_2, m/z:1116.11(3+), RT:21.52, Y-score:87.21



Test set no. 14, Experiment: AGP exp\_4

ENGTISR(=PEP)\_6\_5\_0\_2, m/z:1673.65(2+), RT:22.51, Y-score:83.42

HCD Scan:4826



CID Scan:4825



Test set no. 15, Experiment: AGP exp\_3

ENGTISR(=PEP)\_6\_5\_0\_2, m/z:1116.10(3+), RT:22.67, Y-score:81.87



Test set no. 16, Experiment: AGP exp\_4

ENGTISR(=PEP)\_6\_5\_0\_3, m/z:1213.14(3+), RT:22.59, Y-score:90.71



Test set no. 17, Experiment: AGP exp\_4

ENGTISR(=PEP)\_6\_5\_0\_3, m/z:1819.21(2+), RT:22.62, Y-score:88.99



**Test set no. 18, Experiment: AGP exp\_3**

ENGTISR(=PEP)\_6\_5\_0\_3, m/z:1819.71(2+), RT:22.73, Y-score:86.30



# Test set no. 19, Experiment: AGP exp\_4

ENGTISR(=PEP)\_6\_5\_0\_3, m/z:1213.14(3+), RT:25.16, Y-score:84.00

HCD Scan:6323



CID Scan:6322



Test set no. 20, Experiment: AGP exp\_4

ENGTISR(=PEP)\_6\_5\_1\_1, m/z:1067.76(3+), RT:17.59, Y-score:88.39

HCD Scan:2443



CID Scan:2442





# Test set no. 21, Experiment: AGP exp\_3

ENGTISR(=PEP)\_6\_5\_1\_1, m/z:1067.76(3+), RT:17.76, Y-score:84.30

HCD Scan:2568



CID Scan:2567



# Test set no. 22, Experiment: AGP exp\_4

ENGTISR(=PEP)\_6\_5\_1\_1, m/z:1067.76(3+), RT:16.54, Y-score:82.65

### HCD Scan:2099



### CID Scan:2098



Test set no. 23, Experiment: AGP exp\_3

ENGTISR(=PEP)\_6\_5\_1\_1, m/z:1067.76(3+), RT:16.76, Y-score:81.67



# Test set no. 24, Experiment: AGP exp\_3

ENGTISR(=PEP)\_6\_5\_1\_2, m/z:1164.79(3+), RT:20.28, Y-score:89.90

### HCD Scan:3716



### CID Scan:3715



Test set no. 25, Experiment: AGP exp\_4

ENGTISR(=PEP)\_6\_5\_1\_2, m/z:1164.79(3+), RT:20.73, Y-score:87.01



Test set no. 26, Experiment: AGP exp\_3

ENGTISR(=PEP)\_6\_5\_1\_2, m/z:1164.79(3+), RT:20.92, Y-score:83.95



Test set no. 27, Experiment: AGP exp\_4

ENGTISR(=PEP)\_6\_5\_1\_2, m/z:1164.79(3+), RT:21.33, Y-score:70.96



Test set no. 28, Experiment: AGP exp\_3

ENGTISR(=PEP)\_6\_5\_1\_3, m/z:1261.83(3+), RT:22.59, Y-score:92.48





Test set no. 29, Experiment: AGP exp\_4

ENGTISR(=PEP)\_6\_5\_1\_3, m/z:1261.82(3+), RT:22.52, Y-score:91.50



Test set no. 30, Experiment: AGP exp\_40

ENGTISR(=PEP)\_6\_5\_2\_2, m/z:1213.48(3+), RT:24.00, Y-score:81.52



Test set no. 31, Experiment: AGP exp\_30

ENGTISR(=PEP)\_6\_5\_2\_3, m/z:1310.51(3+), RT:39.94, Y-score:91.71

HCD Scan:7910



CID Scan:7912



Test set no. 32, Experiment: AGP exp\_36

ENGTISR(=PEP)\_6\_5\_2\_3, m/z:1310.51(3+), RT:34.06, Y-score:90.54

HCD Scan:10021



CID Scan:10024



Test set no. 33, Experiment: AGP exp\_37

ENGTISR(=PEP)\_6\_5\_2\_3, m/z:1310.51(3+), RT:33.53, Y-score:90.23

HCD Scan:9865



CID Scan:9868



Test set no. 34, Experiment: AGP exp\_35

ENGTISR(=PEP)\_6\_5\_2\_3, m/z:1310.51(3+), RT:33.60, Y-score:89.94

HCD Scan:9848



CID Scan:9853



Test set no. 35, Experiment: AGP exp\_34

ENGTISR(=PEP)\_6\_5\_2\_3, m/z:1310.51(2+), RT:34.27, Y-score:89.04

HCD Scan:7971



CID Scan:7974



Test set no. 36, Experiment: AGP exp\_22

ENGTISR(=PEP)\_6\_5\_2\_3, m/z:1310.51(3+), RT:33.93, Y-score:88.45

HCD Scan:9863



CID Scan:9866





Test set no. 37, Experiment: AGP exp\_28

ENGTISR(=PEP)\_6\_5\_2\_3, m/z:1310.51(3+), RT:34.79, Y-score:87.89

HCD Scan:10184



CID Scan:10186



Test set no. 38, Experiment: AGP exp\_20

ENGTISR(=PEP)\_6\_5\_2\_3, m/z:1310.51(3+), RT:33.96, Y-score:87.69

HCD Scan:9985



CID Scan:9990



Test set no. 39, Experiment: AGP exp\_32

ENGTISR(=PEP)\_6\_5\_2\_3, m/z:1310.51(3+), RT:34.19, Y-score:87.52

HCD Scan:8075



CID Scan:8077



Test set no. 40, Experiment: AGP exp\_18

ENGTISR(=PEP)\_6\_5\_2\_3, m/z:1310.51(3+), RT:34.64, Y-score:84.64

HCD Scan:9961



CID Scan:9968



# Test set no. 41, Experiment: AGP exp\_19

ENGTISR(=PEP)\_6\_5\_2\_3, m/z:1310.51(3+), RT:34.65, Y-score:83.75



Test set no. 42, Experiment: AGP exp\_25

ENGTISR(=PEP)\_6\_5\_2\_3, m/z:1310.51(3+), RT:35.34, Y-score:82.00

CID Scan:10757



CID Scan:10759



Test set no. 43, Experiment: AGP exp\_3

ENGTISR(=PEP)\_6\_5\_2\_3, m/z:1310.51(3+), RT:22.68, Y-score:81.15

HCD Scan:5060



CID Scan:5059



# Test set no. 44, Experiment: AGP exp\_3

ENGTISR(=PEP)\_7\_6\_1\_1, m/z:1189.47(3+), RT:16.86, Y-score:85.17

HCD Scan:2284



CID Scan:2283





Test set no. 45, Experiment: AGP exp\_4

ENGTISR(=PEP)\_7\_6\_1\_2, m/z:1286.50(3+), RT:19.44, Y-score:94.32



Test set no. 46, Experiment: AGP exp\_4

ENGTISR(=PEP)\_7\_6\_1\_2, m/z:1286.50(3+), RT:20.00, Y-score:93.76



Test set no. 47, Experiment: AGP exp\_3

ENGTISR(=PEP)\_7\_6\_1\_2, m/z:1286.50(3+), RT:20.68, Y-score:93.74



Test set no. 48, Experiment: AGP exp\_3

ENGTISR(=PEP)\_7\_6\_1\_2, m/z:1286.51(3+), RT:20.09, Y-score:93.32



Test set no. 49, Experiment: AGP exp\_4

ENGTISR(=PEP)\_7\_6\_1\_2, m/z:1286.50(3+), RT:20.55, Y-score:88.08



Test set no. 50, Experiment: AGP exp\_3

ENGTISR(=PEP)\_7\_6\_1\_2, m/z:1286.50(3+), RT:19.50, Y-score:87.78



Test set no. 51, Experiment: AGP exp\_3

ENGTISR(=PEP)\_7\_6\_1\_3, m/z:1037.90(4+), RT:22.47, Y-score:86.25



Test set no. 52, Experiment: AGP exp\_3

ENGTISR(=PEP)\_7\_6\_1\_4, m/z:1110.68(4+), RT:25.04, Y-score:86.75





Test set no. 53, Experiment: AGP exp\_4

ENGTISR(=PEP)\_7\_6\_1\_4, m/z:1110.68(4+), RT:24.64, Y-score:84.51



Test set no. 54, Experiment: AGP exp\_3

ENGTISR(=PEP)\_7\_6\_2\_4, m/z:1147.19(4+), RT:24.60, Y-score:79.62



Test set no. 55, Experiment: AGP exp\_4

LVPVPITNATLDQITGK(=PEP)\_5\_4\_0\_2, m/z:1328.61(3+), RT:55.29, Y-score:90.23



# Test set no. 56, Experiment: AGP exp\_3

LVPVPITNATLDQITGK(=PEP)\_5\_4\_0\_2, m/z:1328.94(3+), RT:56.01, Y-score:89.57



Test set no. 57, Experiment: AGP exp\_4

LVPVPITNATLDQITGK(=PEP)\_5\_4\_0\_2, m/z:1328.94(3+), RT:55.85, Y-score:88.18



Test set no. 58, Experiment: AGP exp\_4

LVPVPITNATLDQITGK(=PEP)\_5\_4\_0\_2, m/z:996.95(4+), RT:55.63, Y-score:84.21



Test set no. 59, Experiment: AGP exp\_3

LVPVPITNATLDQITGK(=PEP)\_5\_4\_0\_2, m/z:996.96(4+), RT:55.16, Y-score:76.37



Test set no. 60, Experiment: AGP exp\_3

LVPVPITNATLDQITGK(=PEP)\_5\_4\_0\_2, m/z:996.96(4+), RT:55.69, Y-score:75.24





Test set no. 61, Experiment: AGP exp\_4

LVPVPITNATLDQITGK(=PEP)\_6\_5\_0\_1, m/z:1353.62(3+), RT:48.25, Y-score:89.89



# Test set no. 62, Experiment: AGP exp\_4

LVPVPITNATLDQITGK(=PEP)\_6\_5\_0\_1, m/z:1015.46(4+), RT:48.64, Y-score:88.95



Test set no. 63, Experiment: AGP exp\_3

LVPVPITNATLDQITGK(=PEP)\_6\_5\_0\_1, m/z:1015.46(4+), RT:48.24, Y-score:88.64



**Test set no. 64, Experiment: AGP exp\_3**

LVPVPITNATLDQITGK(=PEP)\_6\_5\_0\_1, m/z:1015.46(4+), RT:48.80, Y-score:88.43



Test set no. 65, Experiment: AGP exp\_3

LVPVPITNATLDQITGK(=PEP)\_6\_5\_0\_2, m/z:1450.65(3+), RT:54.88, Y-score:89.21



Test set no. 66, Experiment: AGP exp\_3

LVPVPITNATLDQITGK(=PEP)\_6\_5\_0\_2, m/z:1087.99(4+), RT:54.96, Y-score:87.26



Test set no. 67, Experiment: AGP exp\_3

LVPVPITNATLDQITGK(=PEP)\_6\_5\_0\_2, m/z:1088.24(4+), RT:54.55, Y-score:85.86



**Test set no. 68, Experiment: AGP exp\_4**

LVPVPITNATLDQITGK(=PEP)\_6\_5\_0\_2, m/z:1088.24(4+), RT:55.00, Y-score:85.07





Test set no. 69, Experiment: AGP exp\_3

LVPVPITNATLDQITGK(=PEP)\_6\_5\_0\_2, m/z:1088.24(4+), RT:55.36, Y-score:84.21



Test set no. 70, Experiment: AGP exp\_4

LVPVPITNATLDQITGK(=PEP)\_6\_5\_0\_2, m/z:1088.24(4+), RT:55.57, Y-score:81.01



Test set no. 71, Experiment: AGP exp\_4

LVPVPITNATLDQITGK(=PEP)\_6\_5\_0\_3, m/z:1547.68(3+), RT:62.33, Y-score:86.39



**Test set no. 72, Experiment: AGP exp\_3**

LVPVPITNATLDQITGK(=PEP)\_6\_5\_0\_3, m/z:1547.68(3+), RT:63.37, Y-score:85.37



**Test set no. 73, Experiment: AGP exp\_3**

LVPVPITNATLDQITGK(=PEP)\_6\_5\_0\_3, m/z:1160.77(4+), RT:62.84, Y-score:85.17



Test set no. 74, Experiment: AGP exp\_3

LVPVPITNATLDQITGK(=PEP)\_6\_5\_0\_3, m/z:1160.76(4+), RT:62.24, Y-score:84.25



Test set no. 75, Experiment: AGP exp\_3

LVPVPITNATLDQITGK(=PEP)\_6\_5\_0\_3, m/z:1162.01(4+), RT:62.76, Y-score:84.14



Test set no. 76, Experiment: AGP exp\_4

LVPVPITNATLDQITGK(=PEP)\_6\_5\_0\_3, m/z:1547.69(3+), RT:61.80, Y-score:83.56





Test set no. 77, Experiment: AGP exp\_4

LVPVPITNATLDQITGK(=PEP)\_6\_5\_0\_3, m/z:1160.76(4+), RT:62.31, Y-score:83.23



Test set no. 78, Experiment: AGP exp\_4

LVPVPITNATLDQITGK(=PEP)\_6\_5\_0\_3, m/z:1160.77(4+), RT:63.37, Y-score:82.16



Test set no. 79, Experiment: AGP exp\_4

LVPVPITNATLDQITGK(=PEP)\_6\_5\_0\_3, m/z:1161.01(4+), RT:62.85, Y-score:81.71



Test set no. 80, Experiment: AGP exp\_3

LVPVPITNATLDQITGK(=PEP)\_6\_5\_0\_3, m/z:1160.76(4+), RT:63.38, Y-score:81.71



**Test set no. 81, Experiment: AGP exp\_4**

LVPVPITNATLDQITGK(=PEP)\_6\_5\_1\_1, m/z:1402.30(3+), RT:48.44, Y-score:89.15



Test set no. 82, Experiment: AGP exp\_3

LVPVPITNATLDQITGK(=PEP)\_6\_5\_1\_1, m/z:1402.30(3+), RT:48.57, Y-score:88.92



Test set no. 83, Experiment: AGP exp\_4

LVPVPITNATLDQITGK(=PEP)\_6\_5\_1\_1, m/z:1051.98(4+), RT:48.56, Y-score:82.99



Test set no. 84, Experiment: AGP exp\_4

LVPVPITNATLDQITGK(=PEP)\_6\_5\_1\_2, m/z:1499.34(3+), RT:54.84, Y-score:89.97





Test set no. 85, Experiment: AGP exp\_3

LVPVPITNATLDQITGK(=PEP)\_6\_5\_1\_2, m/z:1499.34(3+), RT:54.80, Y-score:87.16



Test set no. 86, Experiment: AGP exp\_3

LVPVPITNATLDQITGK(=PEP)\_6\_5\_1\_2, m/z:1499.34(3+), RT:55.37, Y-score:85.68



Test set no. 87, Experiment: AGP exp\_4

LVPVPITNATLDQITGK(=PEP)\_6\_5\_1\_2, m/z:1124.75(4+), RT:54.85, Y-score:83.90



Test set no. 88, Experiment: AGP exp\_3

LVPVPITNATLDQITGK(=PEP)\_6\_5\_1\_2, m/z:1124.75(4+), RT:54.93, Y-score:81.10



Test set no. 89, Experiment: AGP exp\_4

LVPVPITNATLDQITGK(=PEP)\_6\_5\_1\_3, m/z:1596.36(3+), RT:62.44, Y-score:88.44



Test set no. 90, Experiment: AGP exp\_4

LVPVPITNATLDQITGK(=PEP)\_6\_5\_1\_3, m/z:1596.37(3+), RT:62.97, Y-score:87.65



**Test set no. 91, Experiment: AGP exp\_3**

LVPVPITNATLDQITGK(=PEP)\_6\_5\_1\_3, m/z:1596.38(3+), RT:62.44, Y-score:87.59



Test set no. 92, Experiment: AGP exp\_3

LVPVPITNATLDQITGK(=PEP)\_6\_5\_1\_3, m/z:1197.53(4+), RT:62.49, Y-score:87.29





Test set no. 93, Experiment: AGP exp\_3

LVPVPITNATLDQITGK(=PEP)\_6\_5\_1\_3, m/z:1596.38(3+), RT:62.46, Y-score:85.62



**Test set no. 94, Experiment: AGP exp\_3**

LVPVPITNATLDQITGK(=PEP)\_6\_5\_1\_3, m/z:1596.37(3+), RT:62.99, Y-score:85.57



Test set no. 95, Experiment: AGP exp\_3

LVPVPITNATLDQITGK(=PEP)\_6\_5\_1\_3, m/z:1197.53(4+), RT:62.35, Y-score:84.46



Test set no. 96, Experiment: AGP exp\_3

LVPVPITNATLDQITGK(=PEP)\_6\_5\_1\_3, m/z:1197.53(4+), RT:63.01, Y-score:83.38



Test set no. 97, Experiment: AGP exp\_4

LVPVPITNATLDQITGK(=PEP)\_6\_5\_1\_3, m/z:1197.53(4+), RT:62.45, Y-score:83.32



**Test set no. 98, Experiment: AGP exp\_4**

LVPVPITNATLDQITGK(=PEP)\_6\_5\_1\_3, m/z:1197.53(4+), RT:62.97, Y-score:81.14



Test set no. 99, Experiment: AGP exp\_18

LVPVPITNATLDQITGK(=PEP)\_6\_5\_2\_2, m/z:1548.02(3+), RT:96.58, Y-score:87.09

HCD Scan:35500



CID Scan:35503



**Test set no. 100, Experiment: AGP exp\_7**

LVPVPITNATLDQITGK(=PEP)\_6\_5\_2\_3, m/z:1234.04(4+), RT:83.42, Y-score:84.50

HCD Scan:29852



CID Scan:29857





**Test set no. 101, Experiment: AGP exp\_38**

LVPVPITNATLDQITGK(=PEP)\_6\_5\_2\_3, m/z:1234.04(4+), RT:83.98, Y-score:80.43

HCD Scan:32055



CID Scan:32062



**Test set no. 102, Experiment: AGP exp\_32**

LVPVPITNATLDQITGK(=PEP)\_6\_5\_2\_3, m/z:1234.04(4+), RT:82.70, Y-score:79.77

HCD Scan:29830



CID Scan:29837



Test set no. 103, Experiment: AGP exp\_30

LVPVPITNATLDQITGK(=PEP)\_6\_5\_2\_3, m/z:1234.04(4+), RT:83.14, Y-score:77.05

HCD Scan:27101



CID Scan:27103



Test set no. 104, Experiment: AGP exp\_4

NEEYNK(=PEP)\_4\_3\_0\_0, m/z:1027.40(2+), RT:15.47, Y-score:90.11



Test set no. 105, Experiment: AGP exp\_3

NEEYNK(=PEP)\_4\_3\_0\_0, m/z:1027.40(2+), RT:15.37, Y-score:82.07



Test set no. 106, Experiment: AGP exp\_4

NEEYNK(=PEP)\_4\_3\_0\_1, m/z:1172.95(2+), RT:16.18, Y-score:94.93

HCD Scan:1967



CID Scan:1966



Test set no. 107, Experiment: AGP exp\_3

NEEYNK(=PEP)\_4\_3\_0\_1, m/z:1172.95(2+), RT:14.57, Y-score:92.52



**Test set no. 108, Experiment: AGP exp\_3**

NEEYNK(=PEP)\_4\_3\_0\_1, m/z:1172.95(2+), RT:16.07, Y-score:92.34





# Test set no. 109, Experiment: AGP exp\_4

NEEYNK(=PEP)\_4\_3\_0\_1, m/z:1172.95(2+), RT:14.69, Y-score:81.86

HCD Scan:1426



CID Scan:1425



Test set no. 110, Experiment: AGP exp\_4

NEEYNK(=PEP)\_4\_4\_0\_1, m/z:1274.49(2+), RT:15.36, Y-score:93.63



**Test set no. 111, Experiment: AGP exp\_4**

NEEYNK(=PEP)\_4\_4\_0\_1, m/z:1274.49(2+), RT:15.86, Y-score:92.80



Test set no. 112, Experiment: AGP exp\_3

NEEYNK(=PEP)\_4\_4\_0\_1, m/z:1274.49(2+), RT:15.78, Y-score:92.41



Test set no. 113, Experiment: AGP exp\_3

NEEYNK(=PEP)\_4\_4\_0\_1, m/z:1274.49(2+), RT:15.26, Y-score:91.55

HCD Scan:1533



CID Scan:1532



Test set no. 114, Experiment: AGP exp\_3

NEEYNK(=PEP)\_4\_4\_0\_1, m/z:1274.49(2+), RT:16.30, Y-score:78.61



Test set no. 115, Experiment: AGP exp\_3

NEEYNK(=PEP)\_5\_4\_0\_0, m/z:1209.97(2+), RT:14.28, Y-score:95.20



Test set no. 116, Experiment: AGP exp\_4

NEEYNK(=PEP)\_5\_4\_0\_0, m/z:1209.97(2+), RT:14.28, Y-score:91.28





**Test set no. 117, Experiment: AGP exp\_3**

NEEYNK(=PEP)\_5\_4\_0\_1, m/z:904.02(3+), RT:15.77, Y-score:94.05



Test set no. 118, Experiment: AGP exp\_3

NEEYNK(=PEP)\_5\_4\_0\_1, m/z:904.02(3+), RT:18.59, Y-score:93.75



**Test set no. 119, Experiment: AGP exp\_4**

NEEYNK(=PEP)\_5\_4\_0\_1, m/z:904.02(3+), RT:15.88, Y-score:93.58



Test set no. 120, Experiment: AGP exp\_3

NEEYNK(=PEP)\_5\_4\_0\_1, m/z:1356.02(2+), RT:16.28, Y-score:92.85



Test set no. 121, Experiment: AGP exp\_4

NEEYNK(=PEP)\_5\_4\_0\_1, m/z:1356.02(2+), RT:15.86, Y-score:92.81



Test set no. 122, Experiment: AGP exp\_4

NEEYNK(=PEP)\_5\_4\_0\_1, m/z:904.02(3+), RT:15.36, Y-score:91.96



Test set no. 123, Experiment: AGP exp\_3

NEEYNK(=PEP)\_5\_4\_0\_1, m/z:1356.02(2+), RT:15.76, Y-score:91.42



Test set no. 124, Experiment: AGP exp\_4

NEEYNK(=PEP)\_5\_4\_0\_1, m/z:1355.52(2+), RT:15.35, Y-score:90.82





Test set no. 125, Experiment: AGP exp\_3

NEEYNK(=PEP)\_5\_4\_0\_1, m/z:1355.52(2+), RT:18.88, Y-score:90.56



Test set no. 126, Experiment: AGP exp\_4

NEEYNK(=PEP)\_5\_4\_0\_1, m/z:1355.52(2+), RT:16.37, Y-score:89.85



Test set no. 127, Experiment: AGP exp\_3

NEEYNK(=PEP)\_5\_4\_0\_1, m/z:1356.02(2+), RT:19.46, Y-score:85.23



Test set no. 128, Experiment: AGP exp\_3

NEEYNK(=PEP)\_5\_4\_0\_1, m/z:1355.52(2+), RT:16.80, Y-score:81.99



Test set no. 129, Experiment: AGP exp\_4

NEEYNK(=PEP)\_5\_4\_0\_1, m/z:1355.52(2+), RT:17.41, Y-score:80.39



**Test set no. 130, Experiment: AGP exp\_4**

NEEYNK(=PEP)\_5\_4\_0\_1, m/z:1355.52(2+), RT:16.90, Y-score:79.62





Test set no. 132, Experiment: AGP exp\_3

NEEYNK(=PEP)\_5\_4\_0\_2, m/z:1001.05(3+), RT:19.92, Y-score:93.75

HCD Scan:3522



CID Scan:3521





**Test set no. 133, Experiment: AGP exp\_3**

NEEYNK(=PEP)\_5\_4\_0\_2, m/z:1001.05(3+), RT:19.29, Y-score:93.55

HCD Scan:3174



CID Scan:3173



# Test set no. 134, Experiment: AGP exp\_4

NEEYNK(=PEP)\_5\_4\_0\_2, m/z:1002.05(3+), RT:18.70, Y-score:90.39

### HCD Scan:2752



### CID Scan:2755



# Test set no. 135, Experiment: AGP exp\_4

NEEYNK(=PEP)\_5\_4\_0\_2, m/z:1501.07(2+), RT:19.51, Y-score:93.05



Test set no. 136, Experiment: AGP exp\_4

NEEYNK(=PEP)\_5\_4\_0\_2, m/z:1001.05(3+), RT:20.27, Y-score:92.51

HCD Scan:3581



CID Scan:3580



Test set no. 137, Experiment: AGP exp\_3

NEEYNK(=PEP)\_5\_4\_0\_2, m/z:1001.05(3+), RT:18.65, Y-score:93.91



Test set no. 138, Experiment: AGP exp\_4

NEEYNK(=PEP)\_5\_4\_0\_2, m/z:1001.05(3+), RT:19.73, Y-score:90.99



Test set no. 139, Experiment: AGP exp\_3

NEEYNK(=PEP)\_5\_4\_0\_2, m/z:1501.06(2+), RT:19.64, Y-score:90.93



Test set no. 140, Experiment: AGP exp\_3

NEEYNK(=PEP)\_5\_4\_0\_2, m/z:1001.05(3+), RT:20.50, Y-score:90.81





Test set no. 141, Experiment: AGP exp\_4

NEEYNK(=PEP)\_5\_4\_0\_2, m/z:1001.05(3+), RT:18.71, Y-score:93.40

HCD Scan:2756



CID Scan:2755



Test set no. 142, Experiment: AGP exp\_3

NEEYNK(=PEP)\_5\_4\_0\_2, m/z:1501.57(2+), RT:18.45, Y-score:87.43



Test set no. 143, Experiment: AGP exp\_3

NEEYNK(=PEP)\_5\_4\_0\_2, m/z:1501.57(2+), RT:22.12, Y-score:87.17



Test set no. 144, Experiment: AGP exp\_4

NEEYNK(=PEP)\_5\_4\_0\_2, m/z:1500.56(2+), RT:20.08, Y-score:84.35

HCD Scan:3486



CID Scan:3485



**Test set no. 145, Experiment: AGP exp\_3**

NEEYNK(=PEP)\_5\_4\_0\_2, m/z:1501.07(2+), RT:20.23, Y-score:81.72



**Test set no. 146, Experiment: AGP exp\_4**

NEEYNK(=PEP)\_5\_4\_1\_1, m/z:1428.54(2+), RT:15.70, Y-score:86.66



Test set no. 147, Experiment: AGP exp\_4

NEEYNK(=PEP)\_5\_4\_1\_2, m/z:1049.73(3+), RT:19.38, Y-score:89.96

HCD Scan:3138



CID Scan:3137



Test set no. 148, Experiment: AGP exp\_4

NEEYNK(=PEP)\_5\_4\_1\_2, m/z:1049.73(3+), RT:18.31, Y-score:83.45





Test set no. 149, Experiment: AGP exp\_3

NEEYNK(=PEP)\_5\_4\_1\_2, m/z:1049.73(3+), RT:18.87, Y-score:82.44



Test set no. 150, Experiment: AGP exp\_3

NEEYNK(=PEP)\_5\_4\_1\_2, m/z:1049.73(3+), RT:18.30, Y-score:82.09

HCD Scan:2676



CID Scan:2675



Test set no. 151, Experiment: AGP exp\_4

NEEYNK(=PEP)\_5\_4\_1\_2, m/z:1049.73(3+), RT:18.87, Y-score:72.79



# Test set no. 152, Experiment: AGP exp\_27

NEEYNK(=PEP)\_5\_4\_2\_2, m/z:1098.42(3+), RT:21.48, Y-score:88.07

HCD Scan:4340



CID Scan:4342



Test set no. 153, Experiment: AGP exp\_18

NEEYNK(=PEP)\_5\_4\_2\_2, m/z:1098.42(3+), RT:21.13, Y-score:87.57



Test set no. 154, Experiment: AGP exp\_14

NEEYNK(=PEP)\_5\_4\_2\_2, m/z:1098.42(3+), RT:23.44, Y-score:83.32



Test set no. 155, Experiment: AGP exp\_10

NEEYNK(=PEP)\_5\_4\_2\_2, m/z:1098.42(3+), RT:21.04, Y-score:81.81



Test set no. 156, Experiment: AGP exp\_16

NEEYNK(=PEP)\_5\_4\_2\_2, m/z:1098.42(3+), RT:23.20, Y-score:75.62





# Test set no. 157, Experiment: AGP exp\_3

NEEYNK(=PEP)\_5\_5\_0\_2, m/z:1068.74(3+), RT:20.78, Y-score:78.50

### HCD Scan:3998



### CID Scan:3997



Test set no. 158, Experiment: AGP exp\_3

NEEYNK(=PEP)\_6\_5\_0\_1, m/z:1025.73(3+), RT:16.84, Y-score:91.85



# Test set no. 159, Experiment: AGP exp\_3

NEEYNK(=PEP)\_6\_5\_0\_1, m/z:1025.73(3+), RT:17.37, Y-score:91.26



# Test set no. 160, Experiment: AGP exp\_4

NEEYNK(=PEP)\_6\_5\_0\_1, m/z:1538.08(2+), RT:16.98, Y-score:91.02

HCD Scan:2267



CID Scan:2266



Test set no. 161, Experiment: AGP exp\_4

NEEYNK(=PEP)\_6\_5\_0\_1, m/z:1025.73(3+), RT:17.37, Y-score:90.67

HCD Scan:2384



CID Scan:2383



Test set no. 162, Experiment: AGP exp\_4

NEEYNK(=PEP)\_6\_5\_0\_1, m/z:1025.73(3+), RT:15.81, Y-score:89.50



Test set no. 163, Experiment: AGP exp\_4

NEEYNK(=PEP)\_6\_5\_0\_1, m/z:1025.73(3+), RT:16.86, Y-score:89.28



Test set no. 164, Experiment: AGP exp\_3

NEEYNK(=PEP)\_6\_5\_0\_1, m/z:1025.73(3+), RT:16.33, Y-score:89.15





Test set no. 165, Experiment: AGP exp\_4

NEEYNK(=PEP)\_6\_5\_0\_1, m/z:1538.09(2+), RT:15.95, Y-score:77.68



Test set no. 166, Experiment: AGP exp\_3

NEEYNK(=PEP)\_6\_5\_0\_2, m/z:1122.76(3+), RT:20.37, Y-score:93.54



**Test set no. 167, Experiment: AGP exp\_4**

NEEYNK(=PEP)\_6\_5\_0\_2, m/z:1122.76(3+), RT:20.17, Y-score:92.54



Test set no. 168, Experiment: AGP exp\_4

NEEYNK(=PEP)\_6\_5\_0\_2, m/z:1122.76(3+), RT:19.61, Y-score:92.37



Test set no. 169, Experiment: AGP exp\_4

NEEYNK(=PEP)\_6\_5\_0\_2, m/z:1122.76(3+), RT:20.78, Y-score:91.69





Test set no. 171, Experiment: AGP exp\_4

NEEYNK(=PEP)\_6\_5\_0\_2, m/z:1683.63(2+), RT:20.57, Y-score:90.65

HCD Scan:3733



CID Scan:3732



Test set no. 172, Experiment: AGP exp\_3

NEEYNK(=PEP)\_6\_5\_0\_2, m/z:1122.76(3+), RT:20.96, Y-score:90.13









Test set no. 175, Experiment: AGP exp\_3

NEEYNK(=PEP)\_6\_5\_0\_3, m/z:1219.79(3+), RT:22.20, Y-score:90.67



Test set no. 176, Experiment: AGP exp\_4

NEEYNK(=PEP)\_6\_5\_0\_3, m/z:1219.45(3+), RT:22.15, Y-score:89.54



Test set no. 177, Experiment: AGP exp\_4

NEEYNK(=PEP)\_6\_5\_1\_1, m/z:1074.41(3+), RT:15.70, Y-score:95.87



Test set no. 178, Experiment: AGP exp\_4

NEEYNK(=PEP)\_6\_5\_1\_1, m/z:1074.41(3+), RT:16.24, Y-score:91.34



Test set no. 179, Experiment: AGP exp\_4

NEEYNK(=PEP)\_6\_5\_1\_1, m/z:1074.41(3+), RT:16.76, Y-score:91.27



# Test set no. 180, Experiment: AGP exp\_3

NEEYNK(=PEP)\_6\_5\_1\_1, m/z:1074.41(3+), RT:16.19, Y-score:90.37





Test set no. 181, Experiment: AGP exp\_3

NEEYNK(=PEP)\_6\_5\_1\_1, m/z:1074.41(3+), RT:16.70, Y-score:90.11



Test set no. 182, Experiment: AGP exp\_3

NEEYNK(=PEP)\_6\_5\_1\_2, m/z:1171.45(3+), RT:20.22, Y-score:92.00





Test set no. 184, Experiment: AGP exp\_4

NEEYNK(=PEP)\_6\_5\_1\_2, m/z:1173.05(3+), RT:19.55, Y-score:85.71





Test set no. 186, Experiment: AGP exp\_3

NEEYNK(=PEP)\_6\_5\_1\_2, m/z:1171.44(3+), RT:19.64, Y-score:88.72



Test set no. 187, Experiment: AGP exp\_4

NEEYNK(=PEP)\_6\_5\_1\_2, m/z:1171.44(3+), RT:18.46, Y-score:87.16



Test set no. 188, Experiment: AGP exp\_4

NEEYNK(=PEP)\_6\_5\_1\_2, m/z:1171.44(3+), RT:20.69, Y-score:87.14

HCD Scan:3798



CID Scan:3797





Test set no. 189, Experiment: AGP exp\_3

NEEYNK(=PEP)\_6\_5\_1\_2, m/z:1171.44(3+), RT:20.77, Y-score:86.01



Test set no. 190, Experiment: AGP exp\_4

NEEYNK(=PEP)\_6\_5\_1\_2, m/z:1171.44(3+), RT:19.58, Y-score:90.29



Test set no. 191, Experiment: AGP exp\_3

NEEYNK(=PEP)\_6\_5\_1\_3, m/z:1269.15(3+), RT:22.15, Y-score:90.39



Test set no. 192, Experiment: AGP exp\_4

NEEYNK(=PEP)\_6\_5\_1\_3, m/z:1268.14(3+), RT:21.98, Y-score:89.74



Test set no. 193, Experiment: AGP exp\_32

NEEYNK(=PEP)\_6\_5\_2\_2, m/z:1220.13(3+), RT:24.16, Y-score:93.20



Test set no. 194, Experiment: AGP exp\_27

NEEYNK(=PEP)\_6\_5\_2\_2, m/z:1220.13(3+), RT:20.64, Y-score:91.98



Test set no. 195, Experiment: AGP exp\_35

NEEYNK(=PEP)\_6\_5\_2\_2, m/z:1220.13(3+), RT:21.54, Y-score:91.08



Test set no. 196, Experiment: AGP exp\_33

NEEYNK(=PEP)\_6\_5\_2\_2, m/z:1219.79(3+), RT:24.19, Y-score:89.35





Test set no. 197, Experiment: AGP exp\_39

NEEYNK(=PEP)\_6\_5\_2\_2, m/z:1220.13(3+), RT:21.74, Y-score:88.15





# Test set no. 199, Experiment: AGP exp\_33

NEEYNK(=PEP)\_6\_5\_2\_2, m/z:1220.13(3+), RT:25.05, Y-score:87.27

HCD Scan:4022



CID Scan:4027



Test set no. 200, Experiment: AGP exp\_43

NEEYNK(=PEP)\_6\_5\_2\_2, m/z:1220.13(3+), RT:21.56, Y-score:86.87



**Test set no. 201, Experiment: AGP exp\_10**

NEEYNK(=PEP)\_6\_5\_2\_2, m/z:1220.13(3+), RT:20.88, Y-score:86.27

HCD Scan:4068



CID Scan:4070



Test set no. 202, Experiment: AGP exp\_3

NEEYNK(=PEP)\_6\_5\_2\_2, m/z:1220.13(3+), RT:18.54, Y-score:85.95



Test set no. 203, Experiment: AGP exp\_37

NEEYNK(=PEP)\_6\_5\_2\_2, m/z:1220.13(3+), RT:21.58, Y-score:85.28



Test set no. 204, Experiment: AGP exp\_42

NEEYNK(=PEP)\_6\_5\_2\_2, m/z:1220.13(3+), RT:21.86, Y-score:85.11





Test set no. 205, Experiment: AGP exp\_38

NEEYNK(=PEP)\_6\_5\_2\_2, m/z:1220.13(3+), RT:21.79, Y-score:85.00



Test set no. 206, Experiment: AGP exp\_28

NEEYNK(=PEP)\_6\_5\_2\_2, m/z:1220.13(3+), RT:22.26, Y-score:82.85



Test set no. 207, Experiment: AGP exp\_16

NEEYNK(=PEP)\_5\_4\_2\_2, m/z:1220.13(3+), RT:24.66, Y-score:82.53



Test set no. 208, Experiment: AGP exp\_40

NEEYNK(=PEP)\_6\_5\_2\_2, m/z:1220.13(3+), RT:21.58, Y-score:81.75





Test set no. 210, Experiment: AGP exp\_26

NEEYNK(=PEP)\_6\_5\_2\_2, m/z:1220.13(3+), RT:22.08, Y-score:77.31

HCD Scan:5046



CID Scan:5048



Test set no. 211, Experiment: AGP exp\_40

NEEYNK(=PEP)\_6\_5\_2\_2, m/z:1219.08(3+), RT:20.81, Y-score:76.17



**Test set no. 212, Experiment: AGP exp\_43**

NEEYNK(=PEP)\_6\_5\_2\_2, m/z:1220.13(3+), RT:22.36, Y-score:73.12





Test set no. 213, Experiment: AGP exp\_16

NEEYNK(=PEP)\_6\_5\_2\_3, m/z:1317.16(3+), RT:36.71, Y-score:90.81

HCD Scan:9684



CID Scan:9686



Test set no. 214, Experiment: AGP exp\_10

NEEYNK(=PEP)\_6\_5\_2\_3, m/z:1317.16(3+), RT:30.49, Y-score:90.67

HCD Scan:7455



CID Scan:7457



Test set no. 215, Experiment: AGP exp\_15

NEEYNK(=PEP)\_6\_5\_2\_3, m/z:1317.16(3+), RT:36.71, Y-score:90.49

HCD Scan:9512



CID Scan:9515



Test set no. 216, Experiment: AGP exp\_43

NEEYNK(=PEP)\_6\_5\_2\_3, m/z:1317.16(3+), RT:31.35, Y-score:89.42

HCD Scan:8736



CID Scan:8738



Test set no. 217, Experiment: AGP exp\_39

NEEYNK(=PEP)\_6\_5\_2\_3, m/z:1317.16(3+), RT:31.22, Y-score:89.24

HCD Scan:8631



CID Scan:8633



Test set no. 218, Experiment: AGP exp\_30

NEEYNK(=PEP)\_6\_5\_2\_3, m/z:1317.16(3+), RT:30.94, Y-score:89.11

HCD Scan:3879



CID Scan:3882



Test set no. 219, Experiment: AGP exp\_27

NEEYNK(=PEP)\_6\_5\_2\_3, m/z:1317.16(3+), RT:31.27, Y-score:89.05

HCD Scan:8384



CID Scan:8385



Test set no. 220, Experiment: AGP exp\_22

NEEYNK(=PEP)\_6\_5\_2\_3, m/z:1317.49(3+), RT:30.64, Y-score:88.89

HCD Scan:8440



CID Scan:8445





Test set no. 221, Experiment: AGP exp\_35

NEEYNK(=PEP)\_6\_5\_2\_3, m/z:1317.16(3+), RT:30.96, Y-score:88.80

HCD Scan:8685



CID Scan:8687



Test set no. 222, Experiment: AGP exp\_18

NEEYNK(=PEP)\_6\_5\_2\_3, m/z:1317.16(3+), RT:30.66, Y-score:88.43

HCD Scan:8215



CID Scan:8217



Test set no. 223, Experiment: AGP exp\_24

NEEYNK(=PEP)\_6\_5\_2\_3, m/z:1317.16(3+), RT:31.31, Y-score:87.79

HCD Scan:8856



CID Scan:8858



Test set no. 224, Experiment: AGP exp\_29

NEEYNK(=PEP)\_6\_5\_2\_3, m/z:1317.16(3+), RT:31.03, Y-score:84.28

HCD Scan:3915



CID Scan:3918



Test set no. 225, Experiment: AGP exp\_4

NEEYNK(=PEP)\_6\_5\_2\_3, m/z:1317.16(3+), RT:22.15, Y-score:83.07



**Test set no. 226, Experiment: AGP exp\_13**

NEEYNK(=PEP)\_6\_5\_2\_3, m/z:1317.16(3+), RT:37.27, Y-score:81.14

HCD Scan:10120



CID Scan:10122



Test set no. 227, Experiment: AGP exp\_6

NEEYNK(=PEP)\_6\_5\_2\_3, m/z:1317.16(3+), RT:29.70, Y-score:79.57

HCD Scan:5902



CID Scan:5905







Test set no. 229, Experiment: AGP exp\_3

NEEYNK(=PEP)\_6\_5\_3\_2, m/z:1268.80(3+), RT:24.25, Y-score:75.95

HCD Scan:5954



# Test set no. 230, Experiment: AGP exp\_4

SVQEIQATFFYFTPKN(=PEP)\_6\_5\_0\_3, m/z:1196.00(4+), RT:70.33, Y-score:75.03

HCD Scan:26480



CID Scan:26479



Test set no. 231, Experiment: AGP exp\_4

SVQEIQATFFYFTPKN(=PEP)\_7\_6\_0\_3, m/z:1287.28(4+), RT:69.97, Y-score:80.12



Test set no. 232, Experiment: AGP exp\_4

ENGTVSR(=PEP)\_6\_5\_0\_1, m/z:1014.40(3+), RT:15.54, Y-score:83.38



Test set no. 233, Experiment: AGP exp\_4

ENGTVSR(=PEP)\_6\_5\_0\_2, m/z:1111.43(3+), RT:17.10, Y-score:97.82

HCD Scan:2302



CID Scan:2301



# Test set no. 234, Experiment: AGP exp\_3

ENGTVSR(=PEP)\_6\_5\_0\_2, m/z:1111.43(3+), RT:17.61, Y-score:93.82



Test set no. 235, Experiment: AGP exp\_4

ENGTVSR(=PEP)\_6\_5\_0\_2, m/z:1111.43(3+), RT:17.61, Y-score:93.77



Test set no. 236, Experiment: AGP exp\_3

ENGTVSR(=PEP)\_6\_5\_0\_2, m/z:1111.43(3+), RT:17.11, Y-score:93.03





Test set no. 237, Experiment: AGP exp\_4

ENGTVSR(=PEP)\_6\_5\_0\_2, m/z:1111.43(3+), RT:18.12, Y-score:92.28



Test set no. 238, Experiment: AGP exp\_3

ENGTVSR(=PEP)\_6\_5\_0\_2, m/z:1111.10(3+), RT:18.12, Y-score:89.95



Test set no. 239, Experiment: AGP exp\_4

ENGTVSR(=PEP)\_6\_5\_0\_3, m/z:1208.47(3+), RT:21.16, Y-score:90.79

HCD Scan:4069



CID Scan:4068



# Test set no. 240, Experiment: AGP exp\_3

ENGTVSR(=PEP)\_6\_5\_0\_3, m/z:1208.46(3+), RT:21.12, Y-score:90.31

HCD Scan:4184



CID Scan:4183



# Test set no. 241, Experiment: AGP exp\_3

ENGTVSR(=PEP)\_6\_5\_1\_1, m/z:1063.09(3+), RT:14.71, Y-score:89.50



# Test set no. 242, Experiment: AGP exp\_4

ENGTVSR(=PEP)\_6\_5\_1\_1, m/z:1063.09(3+), RT:14.90, Y-score:87.34



Test set no. 243, Experiment: AGP exp\_4

ENGTVSR(=PEP)\_6\_5\_1\_1, m/z:1063.09(3+), RT:15.44, Y-score:87.27

HCD Scan:1576



CID Scan:1575



Test set no. 244, Experiment: AGP exp\_3

ENGTVSR(=PEP)\_6\_5\_1\_2, m/z:1160.12(3+), RT:17.90, Y-score:96.69





Test set no. 245, Experiment: AGP exp\_4

ENGTVSR(=PEP)\_6\_5\_1\_2, m/z:1160.12(3+), RT:17.11, Y-score:94.38



Test set no. 246, Experiment: AGP exp\_4

ENGTVSR(=PEP)\_6\_5\_1\_3, m/z:1257.15(3+), RT:20.96, Y-score:89.66



Test set no. 247, Experiment: AGP exp\_3

ENGTVSR(=PEP)\_6\_5\_1\_3, m/z:1257.15(3+), RT:20.91, Y-score:87.38

HCD Scan:4069



CID Scan:4068



Test set no. 248, Experiment: AGP exp\_23

ENGTVSR(=PEP)\_6\_5\_2\_3, m/z:1305.84(3+), RT:26.25, Y-score:92.73

HCD Scan:6763



CID Scan:6765



Test set no. 249, Experiment: AGP exp\_9

ENGTVSR(=PEP)\_6\_5\_2\_3, m/z:1305.84(3+), RT:26.05, Y-score:91.34

HCD Scan:5960



CID Scan:5961



Test set no. 250, Experiment: AGP exp\_40

ENGTVSR(=PEP)\_6\_5\_2\_3, m/z:1305.84(3+), RT:27.08, Y-score:90.16

HCD Scan:7027



CID Scan:7029



Test set no. 251, Experiment: AGP exp\_41

ENGTVSR(=PEP)\_6\_5\_2\_3, m/z:1305.84(3+), RT:27.39, Y-score:90.06

HCD Scan:7203



CID Scan:7205



Test set no. 252, Experiment: AGP exp\_38

ENGTVSR(=PEP)\_6\_5\_2\_3, m/z:1305.84(3+), RT:27.33, Y-score:89.69

HCD Scan:7083



CID Scan:7085





Test set no. 253, Experiment: AGP exp\_34

ENGTVSR(=PEP)\_6\_5\_2\_3, m/z:1305.84(3+), RT:29.30, Y-score:89.04

HCD Scan:5842



CID Scan:5844



Test set no. 254, Experiment: AGP exp\_42

ENGTVSR(=PEP)\_6\_5\_2\_3, m/z:1305.84(3+), RT:27.42, Y-score:86.50

HCD Scan:7161



CID Scan:7163



Test set no. 255, Experiment: AGP exp\_32

ENGTVSR(=PEP)\_6\_5\_2\_3, m/z:1305.84(3+), RT:29.43, Y-score:84.01

HCD Scan:5998



CID Scan:6001



Test set no. 256, Experiment: AGP exp\_4

ENGTVSR(=PEP)\_7\_6\_1\_2, m/z:1281.83(3+), RT:16.14, Y-score:93.60



Test set no. 257, Experiment: AGP exp\_3

ENGTVSR(=PEP)\_7\_6\_1\_2, m/z:1281.83(3+), RT:17.12, Y-score:93.26





Test set no. 259, Experiment: AGP exp\_3

ENGTVSR(=PEP)\_7\_6\_1\_2, m/z:1281.83(3+), RT:16.09, Y-score:90.66



Test set no. 260, Experiment: AGP exp\_4

ENGTVSR(=PEP)\_7\_6\_1\_2, m/z:1281.83(3+), RT:16.67, Y-score:90.25





Test set no. 261, Experiment: AGP exp\_4

ENGTVSR(=PEP)\_7\_6\_1\_2, m/z:1281.83(3+), RT:16.70, Y-score:90.13



Test set no. 262, Experiment: AGP exp\_3

ENGTVSR(=PEP)\_7\_6\_1\_4, m/z:1107.17(4+), RT:22.96, Y-score:85.23



Test set no. 263, Experiment: AGP exp\_4

ENGTVSR(=PEP)\_7\_6\_1\_4, m/z:1107.17(4+), RT:22.97, Y-score:84.56



Test set no. 264, Experiment: AGP exp\_4

LVPVPITNATLDR(=PEP)\_3\_3\_0\_0, m/z:1252.61(2+), RT:42.59, Y-score:77.72



Test set no. 265, Experiment: AGP exp\_3

LVPVPITNATLDR(=PEP)\_3\_3\_0\_0, m/z:1252.61(2+), RT:36.81, Y-score:75.09



Test set no. 266, Experiment: AGP exp\_3

LVPVPITNATLDR(=PEP)\_4\_4\_0\_1, m/z:1054.15(3+), RT:37.68, Y-score:86.66



Test set no. 267, Experiment: AGP exp\_3

LVPVPITNATLDR(=PEP)\_4\_4\_0\_1, m/z:1054.15(3+), RT:37.69, Y-score:82.65



Test set no. 268, Experiment: AGP exp\_3

LVPVPITNATLDR(=PEP)\_5\_4\_0\_1, m/z:1661.76(2+), RT:42.55, Y-score:90.50





# Test set no. 269, Experiment: AGP exp\_3

LVPVPITNATLDR(=PEP)\_5\_4\_0\_1, m/z:1108.17(3+), RT:37.45, Y-score:89.92



Test set no. 270, Experiment: AGP exp\_4

LVPVPITNATLDR(=PEP)\_5\_4\_0\_1, m/z:1662.25(2+), RT:42.43, Y-score:83.98



Test set no. 271, Experiment: AGP exp\_3

LVPVPITNATLDR(=PEP)\_5\_4\_0\_1, m/z:831.38(4+), RT:36.85, Y-score:73.42



Test set no. 272, Experiment: AGP exp\_4

LVPVPITNATLDR(=PEP)\_5\_4\_0\_2, m/z:1807.29(2+), RT:43.31, Y-score:91.37



# Test set no. 273, Experiment: AGP exp\_3

LVPVPITNATLDR(=PEP)\_5\_4\_0\_2, m/z:1205.21(3+), RT:43.84, Y-score:90.91



Test set no. 274, Experiment: AGP exp\_3

LVPVPITNATLDR(=PEP)\_5\_4\_0\_2, m/z:904.15(4+), RT:43.35, Y-score:82.53



Test set no. 275, Experiment: AGP exp\_3

LVPVPITNATLDR(=PEP)\_5\_4\_0\_2, m/z:1205.20(3+), RT:50.47, Y-score:81.27



# Test set no. 276, Experiment: AGP exp\_3

LVPVPITNATLDR(=PEP)\_5\_4\_0\_2, m/z:904.16(4+), RT:43.14, Y-score:79.64





Test set no. 277, Experiment: AGP exp\_4

LVPVPITNATLDR(=PEP)\_5\_4\_0\_2, m/z:904.16(4+), RT:43.11, Y-score:76.80



Test set no. 278, Experiment: AGP exp\_3

LVPVPITNATLDR(=PEP)\_5\_4\_1\_2, m/z:1253.89(3+), RT:43.29, Y-score:77.75



Test set no. 279, Experiment: AGP exp\_4

LVPVPITNATLDR(=PEP)\_5\_4\_1\_2, m/z:1253.89(3+), RT:43.09, Y-score:69.07



# Test set no. 280, Experiment: AGP exp\_3

LVPVPITNATLDR(=PEP)\_5\_5\_0\_1, m/z:1175.87(3+), RT:36.89, Y-score:91.34



**Test set no. 281, Experiment: AGP exp\_4**

LVPVPITNATLDR(=PEP)\_5\_5\_0\_1, m/z:1175.87(3+), RT:36.93, Y-score:88.20











Test set no. 285, Experiment: AGP exp\_4

LVPVPITNATLDR(=PEP)\_6\_5\_0\_1, m/z:922.67(4+), RT:36.62, Y-score:87.86



Test set no. 286, Experiment: AGP exp\_3

LVPVPITNATLDR(=PEP)\_6\_5\_0\_1, m/z:922.67(4+), RT:36.75, Y-score:86.94



Test set no. 287, Experiment: AGP exp\_3

LVPVPITNATLDR(=PEP)\_6\_5\_0\_1, m/z:922.67(4+), RT:36.19, Y-score:78.76



Test set no. 288, Experiment: AGP exp\_3

LVPVPITNATLDR(=PEP)\_6\_5\_0\_2, m/z:995.45(4+), RT:43.06, Y-score:87.48



Test set no. 289, Experiment: AGP exp\_3

LVPVPITNATLDR(=PEP)\_6\_5\_0\_2, m/z:995.44(4+), RT:42.88, Y-score:86.99



Test set no. 290, Experiment: AGP exp\_4

LVPVPITNATLDR(=PEP)\_6\_5\_0\_2, m/z:995.45(4+), RT:42.94, Y-score:84.35



Test set no. 291, Experiment: AGP exp\_4

LVPVPITNATLDR(=PEP)\_6\_5\_0\_2, m/z:995.44(4+), RT:42.32, Y-score:84.20



Test set no. 292, Experiment: AGP exp\_4

LVPVPITNATLDR(=PEP)\_6\_5\_0\_2, m/z:995.44(4+), RT:43.49, Y-score:79.17

HCD Scan:15592



CID Scan:15591





Test set no. 293, Experiment: AGP exp\_4

LVPVPITNATLDR(=PEP)\_6\_5\_0\_3, m/z:1068.21(4+), RT:50.62, Y-score:83.08



**Test set no. 294, Experiment: AGP exp\_4**

LVPVPITNATLDR(=PEP)\_6\_5\_0\_3, m/z:1068.21(4+), RT:50.42, Y-score:82.02

HCD Scan:19156



CID Scan:19155



Test set no. 295, Experiment: AGP exp\_3

LVPVPITNATLDR(=PEP)\_6\_5\_0\_3, m/z:1067.96(4+), RT:50.14, Y-score:81.90



Test set no. 296, Experiment: AGP exp\_4

LVPVPITNATLDR(=PEP)\_6\_5\_0\_3, m/z:1068.21(4+), RT:49.85, Y-score:80.98



Test set no. 297, Experiment: AGP exp\_3

LVPVPITNATLDR(=PEP)\_6\_5\_0\_3, m/z:2135.41(2+), RT:50.36, Y-score:80.70





Test set no. 299, Experiment: AGP exp\_4

LVPVPITNATLDR(=PEP)\_6\_5\_1\_1, m/z:1278.57(3+), RT:42.59, Y-score:87.55



Test set no. 300, Experiment: AGP exp\_3

LVPVPITNATLDR(=PEP)\_6\_5\_1\_1, m/z:1278.57(3+), RT:36.49, Y-score:85.55





# Test set no. 301, Experiment: AGP exp\_4

LVPVPITNATLDR(=PEP)\_6\_5\_1\_1, m/z:1278.57(3+), RT:36.88, Y-score:80.40



Test set no. 302, Experiment: AGP exp\_3

LVPVPITNATLDR(=PEP)\_6\_5\_1\_2, m/z:1375.60(3+), RT:43.07, Y-score:92.55



Test set no. 303, Experiment: AGP exp\_4

LVPVPITNATLDR(=PEP)\_6\_5\_1\_2, m/z:1375.60(3+), RT:42.67, Y-score:90.15



Test set no. 304, Experiment: AGP exp\_4

LVPVPITNATLDR(=PEP)\_6\_5\_1\_2, m/z:1375.60(3+), RT:43.23, Y-score:90.01



Test set no. 305, Experiment: AGP exp\_4

LVPVPITNATLDR(=PEP)\_6\_5\_1\_2, m/z:1375.60(3+), RT:42.10, Y-score:89.19



Test set no. 306, Experiment: AGP exp\_3

LVPVPITNATLDR(=PEP)\_6\_5\_1\_2, m/z:1031.95(4+), RT:42.45, Y-score:85.43



# Test set no. 307, Experiment: AGP exp\_4

LVPVPITNATLDR(=PEP)\_6\_5\_1\_2, m/z:1031.95(4+), RT:42.74, Y-score:80.44



Test set no. 308, Experiment: AGP exp\_4

LVPVPITNATLDR(=PEP)\_6\_5\_1\_2, m/z:1031.95(4+), RT:42.16, Y-score:75.73





Test set no. 309, Experiment: AGP exp\_4

LVPVPITNATLDR(=PEP)\_6\_5\_1\_3, m/z:1472.63(3+), RT:50.64, Y-score:86.92



Test set no. 310, Experiment: AGP exp\_3

LVPVPITNATLDR(=PEP)\_6\_5\_1\_3, m/z:1472.63(3+), RT:50.74, Y-score:85.82



Test set no. 311, Experiment: AGP exp\_3

LVPVPITNATLDR(=PEP)\_6\_5\_1\_3, m/z:1104.73(4+), RT:49.74, Y-score:77.70

HCD Scan:19082



CID Scan:19081



Test set no. 312, Experiment: IgG exp\_7

EEQYNSTYR(=PEP)\_3\_3\_0\_0, m/z:1142.96(2+), RT:15.65, Y-score:85.81



Test set no. 313, Experiment: IgG exp\_7

EEQYNSTYR(=PEP)\_3\_3\_1\_0, m/z:1215.99(2+), RT:15.75, Y-score:89.01



Test set no. 314, Experiment: IgG exp\_7

EEQYNSTYR(=PEP)\_3\_3\_1\_0, m/z:1215.99(2+), RT:16.89, Y-score:87.59



Test set no. 315, Experiment: IgG exp\_7

EEQYNSTYR(=PEP)\_3\_3\_1\_0, m/z:1215.99(2+), RT:16.32, Y-score:87.51



Test set no. 316, Experiment: IgG exp\_7

EEQYNSTYR(=PEP)\_3\_3\_1\_0, m/z:1215.99(2+), RT:17.40, Y-score:85.23







Test set no. 318, Experiment: IgG exp\_7

EEQYNSTYR(=PEP)\_3\_4\_0\_0, m/z:1244.50(2+), RT:16.18, Y-score:87.19

HCD Scan:6312



CID Scan:6311



Test set no. 319, Experiment: IgG exp\_7

EEQYNSTYR(=PEP)\_3\_4\_0\_0, m/z:1244.50(2+), RT:16.72, Y-score:86.96

HCD Scan:6632



CID Scan:6631





Test set no. 321, Experiment: IgG exp\_6

EEQYNSTYR(=PEP)\_3\_4\_0\_0, m/z:1244.50(2+), RT:24.37, Y-score:84.47

HCD Scan:4400



CID Scan:4399



Test set no. 322, Experiment: IgG exp\_7

EEQYNSTYR(=PEP)\_3\_4\_1\_0, m/z:1317.53(2+), RT:19.49, Y-score:90.24

HCD Scan:7846



CID Scan:7845



Test set no. 323, Experiment: IgG exp\_7

EEQYNSTYR(=PEP)\_3\_4\_1\_0, m/z:1317.53(2+), RT:14.20, Y-score:89.94

HCD Scan:5296



CID Scan:5295







Test set no. 325, Experiment: IgG exp\_7

EEQYNSTYR(=PEP)\_3\_4\_1\_0, m/z:1317.53(2+), RT:16.36, Y-score:89.19

HCD Scan:6422



CID Scan:6421



Test set no. 326, Experiment: IgG exp\_7

EEQYNSTYR(=PEP)\_3\_4\_1\_0, m/z:1317.53(2+), RT:16.91, Y-score:89.02

HCD Scan:6740



CID Scan:6739



Test set no. 327, Experiment: IgG exp\_7

EEQYNSTYR(=PEP)\_3\_4\_1\_0, m/z:1317.53(2+), RT:18.47, Y-score:88.41

HCD Scan:7491



CID Scan:7490



# Test set no. 328, Experiment: IgG exp\_7

EEQYNSTYR(=PEP)\_3\_4\_1\_0, m/z:1317.53(2+), RT:17.44, Y-score:88.36

HCD Scan:7022



CID Scan:7021



Test set no. 329, Experiment: IgG exp\_5

EEQYNSTYR(=PEP)\_3\_4\_1\_0, m/z:1317.53(2+), RT:24.55, Y-score:88.36

HCD Scan:3034



CID Scan:3033



**Test set no. 330, Experiment: IgG exp\_7**

EEQYNSTYR(=PEP)\_3\_4\_1\_0, m/z:1317.53(2+), RT:15.24, Y-score:86.83

HCD Scan:5765



CID Scan:5764



Test set no. 331, Experiment: IgG exp\_7

EEQYNSTYR(=PEP)\_3\_4\_1\_0, m/z:1317.53(2+), RT:18.98, Y-score:85.46

HCD Scan:7668



CID Scan:7667



Test set no. 332, Experiment: IgG exp\_7

EEQYNSTYR(=PEP)\_3\_4\_1\_0, m/z:1317.53(2+), RT:17.96, Y-score:85.21

HCD Scan:7269



CID Scan:7268





# Test set no. 333, Experiment: IgG exp\_7

EEQYNSTYR(=PEP)\_3\_4\_1\_0, m/z:1318.03(2+), RT:20.56, Y-score:79.75

HCD Scan:8323



CID Scan:8322



Test set no. 334, Experiment: IgG exp\_7

EEQYNSTYR(=PEP)\_3\_5\_0\_0, m/z:1346.04(2+), RT:19.75, Y-score:78.22

HCD Scan:7955



CID Scan:7954







Test set no. 337, Experiment: IgG exp\_7

EEQYNSTYR(=PEP)\_3\_5\_1\_0, m/z:1419.07(2+), RT:20.54, Y-score:82.13

HCD Scan:8315



CID Scan:8314



Test set no. 338, Experiment: IgG exp\_7

EEQYNSTYR(=PEP)\_4\_3\_1\_0, m/z:1297.02(2+), RT:15.99, Y-score:88.45



Test set no. 339, Experiment: IgG exp\_7

EEQYNSTYR(=PEP)\_4\_3\_1\_0, m/z:1297.02(2+), RT:16.56, Y-score:88.43



Test set no. 340, Experiment: IgG exp\_6

EEQYNSTYR(=PEP)\_4\_4\_0\_0, m/z:1325.52(2+), RT:24.31, Y-score:88.10





Test set no. 341, Experiment: IgG exp\_7

EEQYNSTYR(=PEP)\_4\_4\_0\_0, m/z:1325.52(2+), RT:15.23, Y-score:87.35



Test set no. 342, Experiment: IgG exp\_7

EEQYNSTYR(=PEP)\_4\_4\_0\_0, m/z:1325.53(2+), RT:15.80, Y-score:86.55



# Test set no. 343, Experiment: IgG exp\_7

EEQYNSTYR(=PEP)\_4\_4\_0\_0, m/z:1325.53(2+), RT:16.37, Y-score:77.92





Test set no. 345, Experiment: IgG exp\_7

EEQYNSTYR(=PEP)\_4\_4\_1\_0, m/z:1398.56(2+), RT:13.95, Y-score:87.33



**Test set no. 346, Experiment: IgG exp\_7**

EEQYNSTYR(=PEP)\_4\_4\_1\_0, m/z:1398.55(2+), RT:15.00, Y-score:85.04



Test set no. 347, Experiment: IgG exp\_7

EEQYNSTYR(=PEP)\_4\_4\_1\_0, m/z:1398.55(2+), RT:17.23, Y-score:84.62



Test set no. 348, Experiment: IgG exp\_7

EEQYNSTYR(=PEP)\_4\_4\_1\_0, m/z:1398.55(2+), RT:15.55, Y-score:84.19





Test set no. 349, Experiment: IgG exp\_7

EEQYNSTYR(=PEP)\_4\_4\_1\_0, m/z:1398.56(2+), RT:20.90, Y-score:83.78



Test set no. 350, Experiment: IgG exp\_7

EEQYNSTYR(=PEP)\_4\_4\_1\_0, m/z:1398.56(2+), RT:16.69, Y-score:83.16



Test set no. 351, Experiment: IgG exp\_7

EEQYNSTYR(=PEP)\_4\_4\_1\_0, m/z:1398.55(2+), RT:17.75, Y-score:83.13



Test set no. 352, Experiment: IgG exp\_7

EEQYNSTYR(=PEP)\_4\_4\_1\_0, m/z:1398.55(2+), RT:16.12, Y-score:83.11



**Test set no. 353, Experiment: IgG exp\_5**

EEQYNSTYR(=PEP)\_4\_4\_1\_0, m/z:1398.55(2+), RT:24.60, Y-score:83.05





Test set no. 355, Experiment: IgG exp\_6

EEQYNSTYR(=PEP)\_4\_4\_1\_0, m/z:1398.55(2+), RT:24.27, Y-score:80.35



# Test set no. 356, Experiment: IgG exp\_7

EEQYNSTYR(=PEP)\_4\_4\_1\_1, m/z:1029.74(3+), RT:23.08, Y-score:94.22

HCD Scan:9803



CID Scan:9802





Test set no. 357, Experiment: IgG exp\_7

EEQYNSTYR(=PEP)\_4\_4\_1\_1, m/z:1544.10(2+), RT:23.10, Y-score:81.13

HCD Scan:9813



CID Scan:9812



Test set no. 358, Experiment: IgG exp\_6

EEQYNSTYR(=PEP)\_4\_5\_1\_0, m/z:1500.09(2+), RT:24.42, Y-score:84.27



**Test set no. 359, Experiment: IgG exp\_7**

EEQYNSTYR(=PEP)\_4\_5\_1\_0, m/z:1500.09(2+), RT:20.79, Y-score:84.07



Test set no. 360, Experiment: IgG exp\_7

EEQYNSTYR(=PEP)\_5\_4\_0\_0, m/z:1406.55(2+), RT:15.61, Y-score:70.72



Test set no. 361, Experiment: IgG exp\_5

EEQYNSTYR(=PEP)\_5\_4\_1\_0, m/z:1480.08(2+), RT:24.54, Y-score:89.15



Test set no. 362, Experiment: IgG exp\_7

EEQYNSTYR(=PEP)\_5\_4\_1\_0, m/z:1479.58(2+), RT:15.80, Y-score:88.78



Test set no. 363, Experiment: IgG exp\_7

EEQYNSTYR(=PEP)\_5\_4\_1\_0, m/z:1479.58(2+), RT:16.37, Y-score:88.32



Test set no. 364, Experiment: IgG exp\_7

EEQYNSTYR(=PEP)\_5\_4\_1\_0, m/z:1479.58(2+), RT:16.92, Y-score:85.98





Test set no. 365, Experiment: IgG exp\_7

EEQYNSTYR(=PEP)\_5\_4\_1\_1, m/z:1083.75(3+), RT:22.99, Y-score:92.27



Test set no. 366, Experiment: IgG exp\_6

EEQYNSTYR(=PEP)\_5\_4\_1\_1, m/z:1625.13(2+), RT:25.16, Y-score:90.11



Test set no. 367, Experiment: IgG exp\_7

EEQYNSTYR(=PEP)\_5\_4\_1\_1, m/z:1625.13(2+), RT:23.03, Y-score:89.34



Test set no. 368, Experiment: IgG exp\_7

EEQFNSTFR(=PEP)\_3\_3\_1\_0, m/z:1199.99(2+), RT:24.42, Y-score:88.61



Test set no. 369, Experiment: IgG exp\_7

EEQFNSTFR(=PEP)\_3\_4\_0\_0, m/z:1228.50(2+), RT:24.57, Y-score:88.48

HCD Scan:10687



CID Scan:10686



**Test set no. 370, Experiment: IgG exp\_5**

EEQFNSTFR(=PEP)\_3\_4\_1\_0, m/z:1301.53(2+), RT:25.22, Y-score:88.79

HCD Scan:3428



CID Scan:3427



Test set no. 371, Experiment: IgG exp\_7

EEQFNSTFR(=PEP)\_3\_4\_1\_0, m/z:1301.53(2+), RT:24.20, Y-score:87.41

HCD Scan:10462



CID Scan:10461



Test set no. 372, Experiment: IgG exp\_7

EEQFNSTFR(=PEP)\_3\_4\_1\_0, m/z:1301.53(2+), RT:24.78, Y-score:86.66

HCD Scan:10812



CID Scan:10811









**Test set no. 375, Experiment: IgG exp\_5**

EEQFNSTFR(=PEP)\_3\_5\_1\_0, m/z:1403.07(2+), RT:25.26, Y-score:78.99

HCD Scan:3454



CID Scan:3453



Test set no. 376, Experiment: IgG exp\_7

EEQFNSTFR(=PEP)\_4\_3\_1\_0, m/z:1281.02(2+), RT:24.40, Y-score:86.44



Test set no. 377, Experiment: IgG exp\_7

EEQFNSTFR(=PEP)\_4\_4\_0\_0, m/z:1309.53(2+), RT:24.52, Y-score:87.13



Test set no. 378, Experiment: IgG exp\_5

EEQFNSTFR(=PEP)\_4\_4\_1\_0, m/z:1382.56(2+), RT:25.18, Y-score:88.34



Test set no. 379, Experiment: IgG exp\_7

EEQFNSTFR(=PEP)\_4\_4\_1\_0, m/z:1382.56(2+), RT:24.63, Y-score:88.07



Test set no. 380, Experiment: IgG exp\_6

EEQFNSTFR(=PEP)\_4\_4\_1\_0, m/z:1382.56(2+), RT:27.22, Y-score:86.18





Test set no. 381, Experiment: IgG exp\_7

EEQFNSTFR(=PEP)\_4\_4\_1\_0, m/z:1382.56(2+), RT:24.06, Y-score:82.80



# Test set no. 382, Experiment: IgG exp\_6

EEQFNSTFR(=PEP)\_4\_4\_1\_0, m/z:1382.56(2+), RT:25.67, Y-score:81.80



Test set no. 383, Experiment: IgG exp\_7

EEQFNSTFR(=PEP)\_4\_4\_1\_0, m/z:922.04(3+), RT:24.63, Y-score:78.50



Test set no. 384, Experiment: IgG exp\_7

EEQFNSTFR(=PEP)\_4\_4\_1\_1, m/z:1019.07(3+), RT:27.01, Y-score:93.54

HCD Scan:12134



CID Scan:12133



Test set no. 385, Experiment: IgG exp\_5

EEQFNSTFR(=PEP)\_4\_4\_1\_1, m/z:1528.10(2+), RT:25.73, Y-score:87.20

HCD Scan:3740



CID Scan:3739



Test set no. 386, Experiment: IgG exp\_7

EEQFNSTFR(=PEP)\_4\_4\_1\_1, m/z:1528.11(2+), RT:27.05, Y-score:86.45

HCD Scan:12155



CID Scan:12154



Test set no. 387, Experiment: IgG exp\_5

EEQFNSTFR(=PEP)\_4\_4\_1\_1, m/z:1019.07(3+), RT:25.73, Y-score:48.89

HCD Scan:3736



CID Scan:3735



Test set no. 388, Experiment: IgG exp\_7

EEQFNSTFR(=PEP)\_4\_5\_1\_0, m/z:1484.10(2+), RT:24.52, Y-score:84.03





Test set no. 389, Experiment: IgG exp\_5

EEQFNSTFR(=PEP)\_5\_4\_1\_0, m/z:1463.58(2+), RT:25.17, Y-score:88.75



Test set no. 390, Experiment: IgG exp\_7

EEQFNSTFR(=PEP)\_5\_4\_1\_0, m/z:1463.59(2+), RT:24.34, Y-score:88.58



Test set no. 391, Experiment: IgG exp\_7

EEQFNSTFR(=PEP)\_5\_4\_1\_1, m/z:1609.13(2+), RT:26.94, Y-score:87.82



Test set no. 392, Experiment: IgG exp\_7

EEQFNSTYR(=PEP)\_3\_4\_1\_0, m/z:1309.53(2+), RT:22.93, Y-score:88.63

HCD Scan:9712



CID Scan:9711



Test set no. 393, Experiment: IgG exp\_7

EEQFNSTYR(=PEP)\_4\_4\_1\_0, m/z:1390.56(2+), RT:22.91, Y-score:87.07



Unknown set no. 1, Gzrgtko gpv<J wo cp'Ræuo c'gzra3

DIENFNSTQK(=PEP)\_5\_4\_0\_2, m/z:850.84(4+), RT:65.95, Y-score:90.02

HCD Scan:18958



CID Scan:18962



# Unknown set no. 2, Gzrgtko gpw'J wo cp'Rcuo c'gzra3

DIENFNSTQK(=PEP)\_5\_4\_0\_2, m/z:1134.12(3+), RT:65.95, Y-score:93.70

HCD Scan:18957



CID Scan:18960



### Unknown set no. 3, Gzrgtko gpv<J wo cp'Rrcuo c'gzra3

DIENFNSTQK(=PEP)\_5\_4\_0\_2, m/z:1700.67(2+), RT:65.84, Y-score:100.00

HCD Scan:18911



CID Scan:18914





# Unknown set no. 4, Gzrgtko gpv<J wo cp'Rcuo c'gzra4

DIENFNSTQK(=PEP)\_5\_4\_0\_2, m/z:850.84(4+), RT:66.02, Y-score:93.14



# Unknown set no. 5, Gzrgtko gpv<J wo cp'Rtuo c'gzra4

DIENFNSTQK(=PEP)\_5\_4\_0\_2, m/z:1134.12(3+), RT:66.14, Y-score:93.04

HCD Scan:19357



CID Scan:19360



# Unknown set no. 6, Gzrgtko gpv'J wo cp'Rucuo c'gzra4

DIENFNSTQK(=PEP)\_5\_4\_0\_2, m/z:1700.67(2+), RT:66.00, Y-score:83.01



Unknown set no. 7, Gzrgtko gpwJ wo cp'Rxcuo c'gzra5

DIENFNSTQK(=PEP)\_5\_4\_0\_2, m/z:850.84(4+), RT:66.06, Y-score:91.82



# Unknown set no. 8, Gzrgtko gpv'J wo cp'Rrcuo c'gzra4

DIENFNSTQK(=PEP)\_5\_4\_0\_2, m/z:850.84(4+), RT:66.17, Y-score:94.82



Unknown set no. 9, Gzrgtko gpv<J wo cp'Rrcuo c'gzra4

DIENFNSTQK(=PEP)\_5\_4\_0\_2, m/z:1134.12(3+), RT:66.27, Y-score:91.86



Unknown set no. 10, Gzrgtko gpv<J wo cp'Rreuo c'gzra5

DIENFNSTQK(=PEP)\_5\_4\_0\_2, m/z:850.84(4+), RT:65.98, Y-score:91.44

HCD Scan:19009



CID Scan:19011



# Unknown set no. 11, Gzrgtko gpv<J wo cp'Rcuo c'gzra5

DIENFNSTQK(=PEP)\_5\_4\_0\_2, m/z:1134.12(3+), RT:66.30, Y-score:95.82

### HCD Scan:19132



### CID Scan:19135





# Unknown set no. 12, Gzr gtlk gpvJ wo cp'Rruo c'gzra5

DIENFNSTQK(=PEP)\_5\_4\_1\_2, m/z:1182.80(3+), RT:65.12, Y-score:85.59

HCD Scan:18644



CID Scan:18647



# Unknown set no. 13, Gzrgtko gpvJ wo cp'Rcuo c'gzra5

FNETTEK(=PEP)\_5\_4\_0\_2, m/z:1025.07(3+), RT:34.33, Y-score:90.92

HCD Scan:8211



CID Scan:8213



# Unknown set no. 14, Gzrgtko gpv<J wo cp'Rucuo c'gzra5

FNETTEK(=PEP)\_5\_4\_0\_2, m/z:1025.07(3+), RT:33.86, Y-score:94.91



Unknown set no. 15, Gzrgtko gpvJ wo cp'Rcuo c'gzra5

FNETTEK(=PEP)\_6\_5\_0\_3, m/z:1243.81(3+), RT:50.10, Y-score:91.68

HCD Scan:12728



CID Scan:12730



# Unknown set no. 16, Gzrgtko gpv'J wo cp'Ræuo c'gzra3

HNFSHCCSK(=PEP)\_5\_4\_0\_2, m/z:846.07(4+), RT:11.77, Y-score:86.79





# Unknown set no. 18, Gzrgtko gpv<J wo cp'Rucuo c'gzra4

HNFSHCCSK(=PEP)\_5\_4\_0\_2, m/z:1127.75(3+), RT:11.95, Y-score:83.63



Unknown set no. 19, Gzrgtko gpv<J wo cp'Rncuo c'gzra5

HNSHCCSK(=PEP)\_5\_4\_0\_2, m/z:846.07(4+), RT:11.75, Y-score:86.94





Unknown set no. 20, Gzrgtko gpv<J wo cp'Rncuo c'gzra5

HNFSHCCSK(=PEP)\_5\_4\_0\_2, m/z:1127.75(3+), RT:11.76, Y-score:83.41



Unknown set no. 21, Gzrgtko gpvJ wo cp'Rcuo c'gzra3

NCCNTENPPGCYR(=PEP)\_5\_4\_0\_2, m/z:962.36(4+), RT:52.44, Y-score:87.99



Unknown set no. 22, Gzrgtko gpv<J wo cp'Rruo c'gzra3

NCCNTENPPGCYR(=PEP)\_5\_4\_0\_2, m/z:1282.80(3+), RT:52.43, Y-score:86.86

HCD Scan:13717



CID Scan:13720



# Unknown set no. 23, Gzrgtko gpv<J wo cp'Rruo c'gzra4

NCCNTENPPGCYR(=PEP)\_5\_4\_0\_2, m/z:962.36(4+), RT:52.56, Y-score:89.45



# Unknown set no. 24, Gzrgtko gpv<J wo cp'Rtuo c'gza4

NCCNTENPPGCYR(=PEP)\_5\_4\_0\_2, m/z:1282.80(3+), RT:52.17, Y-score:87.52

HCD Scan:13806



CID Scan:13811



# Unknown set no. 25, Gzrgtko gpv<J wo cp'Rtuo c'gzra3

ENGTISR(=PEP)\_5\_4\_0\_2, m/z:994.40(3+), RT:23.98, Y-score:92.32

### HCD Scan:5151



### CID Scan:5154



Unknown set no. 26, Gzrgtko gpw<J wo cp'Rcuo c'gzra4

ENGTISR(=PEP)\_5\_4\_0\_2, m/z:994.40(3+), RT:24.14, Y-score:94.32

HCD Scan:5242



CID Scan:5244



# Unknown set no. 27, Gzrgtko gpv<J wo cp'Rruo c'gzra5

ENGTISR(=PEP)\_5\_4\_0\_2, m/z:994.40(3+), RT:24.34, Y-score:91.46





Unknown set no. 28, Gzr gtlk gpw<J wo cp'Rruo c'gzra6

ENGTISR(=PEP)\_5\_4\_0\_2, m/z:994.40(3+), RT:24.43, Y-score:94.44

CID Scan:5330



CID Scan:5332



Unknown set no. 29, Gzr gklo gpw<J wo cp'Rrcuo c'gzra5

ENGTISR(=PEP)\_5\_4\_0\_2, m/z:994.40(3+), RT:24.41, Y-score:91.08

CID Scan:5194



CID Scan:5195



Unknown set no. 30, Gzrgtko gpv<J wo cp'Rncuo c'gzra3

ENGTISR(=PEP)\_5\_4\_1\_2, m/z:1043.08(3+), RT:23.77, Y-score:80.88



# Unknown set no. 31, Gzrgtko gpv'J wo cp'Rncuo c'gzra4

ENGTISR(=PEP)\_5\_4\_1\_2, m/z:1043.08(3+), RT:24.01, Y-score:79.50

CID Scan:5201



CID Scan:5202



# Unknown set no. 32, Gzrgtko gpv<J wo cp'Rcuo c'gzra5

ENGTISR(=PEP)\_5\_4\_1\_2, m/z:1043.08(3+), RT:24.30, Y-score:76.49





Unknown set no. 34, Gzr gtlk gpvJ wo cp'Rcuo c'gza5

ENGTISR(=PEP)\_6\_5\_0\_3, m/z:1213.13(3+), RT:38.05, Y-score:90.09



Unknown set no. 35, Gzr gtlk gpvJ wo cp'Rtuo c'gzra6

ENGTISR(=PEP)\_6\_5\_0\_3, m/z:910.11(4+), RT:38.29, Y-score:90.80





# Unknown set no. 36, Gzrgtko gpv<J wo cp'Rtuo c'gzra3

ENGTISR(=PEP)\_6\_5\_1\_3, m/z:1261.82(3+), RT:39.41, Y-score:93.76

HCD Scan:9585



CID Scan:9587



Unknown set no. 37, Gzr gklo gpvJ wo cp'Rcuo c'gzra4

ENGTISR(=PEP)\_6\_5\_1\_3, m/z:946.62(4+), RT:37.31, Y-score:91.74

HCD Scan:8915



CID Scan:8919



# Unknown set no. 38, Gzrgtko gpvJ wo cp'Rtuo c'gzra5

ENGTISR(=PEP)\_6\_5\_1\_3, m/z:946.62(4+), RT:37.60, Y-score:87.50

HCD Scan:8891



CID Scan:8894



Unknown set no. 39, Gzrgtko gpvJ wo cp'Rtuo c'gza5

ENGTISR(=PEP)\_6\_5\_1\_3, m/z:1261.82(3+), RT:40.36, Y-score:95.92



Unknown set no. 40, Gzr gtlk gpvJ wo cp'Rcuo c'gzra6

ENGTISR(=PEP)\_6\_5\_1\_3, m/z:946.62(4+), RT:37.65, Y-score:87.88

HCD Scan:8973



CID Scan:8976



Unknown set no. 41, Gzrgtko gwKJ wo cp'Rcuo c'gzra6

ENGTISR(=PEP)\_6\_5\_1\_3, m/z:1261.82(3+), RT:38.03, Y-score:91.02

HCD Scan:9137



CID Scan:9141



Unknown set no. 42, Gzr gtlk gpv<J wo cp'Rcuo c'gzra5

ENGTISR(=PEP)\_6\_5\_1\_3, m/z:946.62(4+), RT:37.69, Y-score:87.98

HCD Scan:8868



CID Scan:8869



# Unknown set no. 43, Gzrgtko gpv<J wo cp'Rruo c'gzra5

ENGTISR(=PEP)\_6\_5\_1\_3, m/z:1261.82(3+), RT:38.51, Y-score:94.37

HCD Scan:9216



CID Scan:9219





Unknown set no. 44, Gzrgtko gpvJ wo cp'Rruo c'gza5

ENGTISR(=PEP)\_7\_6\_1\_4, m/z:1110.67(4+), RT:54.11, Y-score:90.77

HCD Scan:14450



CID Scan:14454



# Unknown set no. 45, Gzrgtko gpvJ wo cp'Rcuo c'gzra6

ENGTISR(=PEP)\_7\_6\_1\_4, m/z:1110.67(4+), RT:52.35, Y-score:88.44

CID Scan:13881



CID Scan:13885



Unknown set no. 46, Gzrgtko gpv<J wo cp'Rtuo c'gzra5

ENGTISR(=PEP)\_7\_6\_1\_4, m/z:1110.68(4+), RT:55.45, Y-score:85.90

HCD Scan:14873



CID Scan:14875



Unknown set no. 47, Gzrgtko gpvJ wo cp'Rcuo c'g'zra4

ENGTISR(=PEP)\_7\_6\_2\_4, m/z:1147.19(4+), RT:52.13, Y-score:83.94

HCD Scan:13818



CID Scan:13822



# Unknown set no. 48, Gzr gtko gpv<J wo cp'Rcuo c'gzra5

ENGTISR(=PEP)\_7\_6\_2\_4, m/z:1147.19(4+), RT:54.23, Y-score:84.92

HCD Scan:14491



CID Scan:14493





Unknown set no. 50, Gzr gtlk gpv<J wo cp'Rtuo c'gzra5

ENGTISR(=PEP)\_7\_6\_2\_4, m/z:1147.19(4+), RT:52.73, Y-score:88.21

HCD Scan:13802



CID Scan:13807



# Unknown set no. 51, Gzrgtko gpvJ wo cp'Rcuo c'gzra5

ENGTISR(=PEP)\_7\_6\_3\_4, m/z:1183.70(4+), RT:53.56, Y-score:83.95

HCD Scan:14150



CID Scan:14153





# Unknown set no. 52, Gzrgtko gpv<J wo cp'Rrcuo c'gzra4

LVPVPITNATLDQITGK(=PEP)\_5\_4\_0\_1, m/z:924.18(4+), RT:104.20, Y-score:78.46

CID Scan:30043



CID Scan:30047



Unknown set no. 53, Gzrgtko gpv<J wo cp'Rtuo c'gzra5

LVPVPITNATLDQITGK(=PEP)\_5\_4\_0\_1, m/z:924.18(4+), RT:104.16, Y-score:86.58



# Unknown set no. 54, Gzrgtko gpv<J wo cp'Rtuo c'gzra6

LVPVPITNATLDQITGK(=PEP)\_5\_4\_0\_1, m/z:924.18(4+), RT:104.31, Y-score:72.83



# Unknown set no. 55, Gzrgtko gpv<J wo cp'Rtuo c'gza6

LVPVPITNATLDQITGK(=PEP)\_5\_4\_0\_2, m/z:996.96(4+), RT:115.23, Y-score:76.10

CID Scan:31476



CID Scan:31478



# Unknown set no. 56 Gzrgtko gpv<J wo cp'Ræuo c'gzra3

LVPVPITNATLDQITGK(=PEP)\_6\_5\_0\_3, m/z:1161.01(4+), RT:127.59, Y-score:79.92



Unknown set no. 57, Gzrgtko gpv<J wo cp'Rrcuo c'gzra6

LVPVPITNATLDQITGK(=PEP)\_6\_5\_0\_3, m/z:1161.01(4+), RT:127.99, Y-score:84.12

HCD Scan:33044



CID Scan:33045



# Unknown set no. 58, Gzrgtko gpvJ wo cp'Rcuo c'gza3

LVPVPITNATLDQITGK(=PEP)\_6\_5\_1\_2, m/z:1124.75(4+), RT:113.97, Y-score:77.81



Unknown set no. 59, Gzrgtko gpv<J wo cp'Rncuo c'g'zra6

LVPVPITNATLDQITGK(=PEP)\_6\_5\_1\_2, m/z:1124.75(4+), RT:114.28, Y-score:82.03





# Unknown set no. 60, Gzrgtko gpvJ wo cp'Rcuo c'gza6

LVPVPITNATLDQITGK(=PEP)\_6\_5\_1\_3, m/z:1197.53(4+), RT:127.44, Y-score:74.27

HCD Scan:32976



CID Scan:32977



# Unknown set no. 61, Gzrgtko gpv<J wo cp'Rruo c'gzra4

QDQCIYNTTYLNVQR(=PEP)\_5\_4\_0\_2, m/z:1030.92(4+), RT:92.35, Y-score:78.08

HCD Scan:27597



CID Scan:27598



Unknown set no. 62, Gzrgtko gpv<J wo cp'Rrcuo c'gzra5

QDQCIYNTTYLNVQR(=PEP)\_5\_4\_0\_2, m/z:1030.92(4+), RT:92.41, Y-score:89.85



Unknown set no. 63, Gzrgtk gpv<J wo cp'Ræuo c'gzra3

QDQCIYNTTYLNVQR(=PEP)\_6\_5\_0\_3, m/z:1194.98(4+), RT:103.12, Y-score:78.52

CID Scan:29127



CID Scan:29130



Unknown set no. 64, Gzr gtlō gpvJ wo cp'Rtuo c'gza4

QDQCIYNTTYLNVQR(=PEP)\_6\_5\_0\_3, m/z:1194.98(4+), RT:103.23, Y-score:81.67



Unknown set no. 65, Gzrgtko gpv<J wo cp'Rruo c'gzra6

QDQCIYNTTYLNVQR(=PEP)\_6\_5\_1\_3, m/z:1231.50(4+), RT:103.03, Y-score:78.76

HCD Scan:29530



CID Scan:29531



# Unknown set no. 66, Gzr gklo gpv'J wo cp'Rruo c'gzra3

NEEYNK(=PEP)\_5\_4\_0\_2, m/z:1001.05(3+), RT:21.87, Y-score:93.92

HCD Scan:4600



CID Scan:4603



# Unknown set no. 67, Gzrgtko gpv<J wo cp'Rcuo c'gzra4

NEEYNK(=PEP)\_5\_4\_0\_2, m/z:1001.05(3+), RT:21.98, Y-score:94.15

HCD Scan:4671



CID Scan:4672





Unknown set no. 68, Gzrgtko gpvJ wo cp'Rtuo c'gzra5

NEEYNK(=PEP)\_5\_4\_0\_2, m/z:1001.05(3+), RT:22.18, Y-score:94.41

CID Scan:4632



CID Scan:4633



Unknown set no. 69, Gzrgtko gpvJ wo cp'Rcuo c'gzra6

NEEYNK(=PEP)\_5\_4\_0\_2, m/z:1001.05(3+), RT:22.24, Y-score:93.23

HCD Scan:4751



CID Scan:4752



Unknown set no. 70, Gzr gtko gpv<J wo cp'Rcuo c'gzra5

NEEYNK(=PEP)\_5\_4\_0\_2, m/z:1501.06(2+), RT:20.95, Y-score:79.37



Unknown set no. 71, Gzrgtko gpv<J wo cp'Rruo c'gzra3

NEEYNK(=PEP)\_5\_4\_1\_2, m/z:1049.73(3+), RT:21.00, Y-score:92.71



Unknown set no. 72, Gzrgtko gpv<J wo cp'Rncuo c'gzra4

NEEYNK(=PEP)\_5\_4\_1\_2, m/z:1049.73(3+), RT:21.09, Y-score:94.57

HCD Scan:4456



CID Scan:4457



Unknown set no. 73, Gzrgtko gpv<J wo cp'Rcuo c'gzra5

NEEYNK(=PEP)\_5\_4\_1\_2, m/z:1049.73(3+), RT:21.24, Y-score:94.14



# Unknown set no. 74, Gzr gtlk gpv<J wo cp'Rucuo c'gzra6

NEEYNK(=PEP)\_5\_4\_1\_2, m/z:1049.73(3+), RT:21.33, Y-score:93.63

HCD Scan:4526



CID Scan:4528



Unknown set no. 75, Gzrgtko gpvJ wo cp'Rruo c'gzra5

NEEYNK(=PEP)\_5\_4\_1\_2, m/z:1049.73(3+), RT:21.29, Y-score:94.45





Unknown set no. 76, Gzrgtko gpv<J wo cp'Rruo c'gzra4

NEEYNK(=PEP)\_6\_5\_0\_2, m/z:1122.76(3+), RT:22.60, Y-score:96.59

HCD Scan:4825



CID Scan:4828



Unknown set no. 77, Gzrgtko gpv<J wo cp'Rncuo c'gzra6

NEEYNK(=PEP)\_6\_5\_0\_2, m/z:1122.76(3+), RT:21.12, Y-score:93.31



Unknown set no. 78, Gzrgtko gpv<J wo cp'Rruo c'gzra3

NEEYNK(=PEP)\_6\_5\_0\_3, m/z:1219.79(3+), RT:34.55, Y-score:95.39



Unknown set no. 79, Gzrgtk gpv<J wo cp'Rncuo c'gzra5

NEEYNK(=PEP)\_6\_5\_0\_3, m/z:1219.79(3+), RT:33.16, Y-score:95.89



# Unknown set no. 80, Gzrgtko gpv<J wo cp'Rcuo c'gzra4

NEEYNK(=PEP)\_6\_5\_1\_2, m/z:1171.44(3+), RT:19.64, Y-score:94.69

HCD Scan:4011



CID Scan:4012



# Unknown set no. 81, Gzrgtko gpv<J wo cp'Rruo c'gzra6

NEEYNK(=PEP)\_6\_5\_1\_2, m/z:1171.44(3+), RT:19.99, Y-score:93.44

HCD Scan:4102



CID Scan:4103



# Unknown set no. 82, Gzr gtlk gpv<J wo cp'Rtuo c'gzra5

NEEYNK(=PEP)\_6\_5\_1\_2, m/z:1171.44(3+), RT:19.93, Y-score:89.95

### HCD Scan:3981



### CID Scan:3982



# Unknown set no. 83, Gzrgtko gpv<J wo cp'Rruo c'gzra3

NEEYNK(=PEP)\_6\_5\_1\_3, m/z:1268.47(3+), RT:31.97, Y-score:91.75

HCD Scan:7467



CID Scan:7468





Unknown set no. 84, Gzrgtko gpv<J wo cp'Rruo c'gzra4

NEEYNK(=PEP)\_6\_5\_1\_3, m/z:951.61(4+), RT:32.93, Y-score:88.53

HCD Scan:7864



CID Scan:7865



Unknown set no. 85, Gzrgtk gpv<J wo cp'Rruo c'gzra4

NEEYNK(=PEP)\_6\_5\_1\_3, m/z:1268.48(3+), RT:32.13, Y-score:95.70

HCD Scan:7606



CID Scan:7608



# Unknown set no. 86, Gzrgtko gpv<J wo cp'Rruo c'gzra5

NEEYNK(=PEP)\_6\_5\_1\_3, m/z:1268.47(3+), RT:35.79, Y-score:93.94

HCD Scan:8516



CID Scan:8517



Unknown set no. 87, Gzrgtko gpv<J wo cp'Rcuo c'gzra6

NEEYNK(=PEP)\_6\_5\_1\_3, m/z:1268.48(3+), RT:32.52, Y-score:93.22

HCD Scan:7649



CID Scan:7652



# Unknown set no. 88, Gzrgtko gpv<J wo cp'Rncuo c'gzra5

NEEYNK(=PEP)\_6\_5\_1\_3, m/z:951.61(4+), RT:32.85, Y-score:84.48

HCD Scan:7656



CID Scan:7660



Unknown set no. 89, Gzrgtko gpv<J wo cp'Rruo c'gzra5

NEEYNK(=PEP)\_6\_5\_1\_3, m/z:1268.48(3+), RT:32.52, Y-score:97.35

HCD Scan:7573



CID Scan:7574



Unknown set no. 90, Gzr gklo gpvJ wo cp'Rruo c'gzra3

NEEYNK(=PEP)\_6\_5\_2\_3, m/z:1317.16(3+), RT:33.20, Y-score:92.38

HCD Scan:7811



CID Scan:7814



# Unknown set no. 91, Gzrgtko gpv<J wo cp'Rrcuo c'gzra4

NEEYNK(=PEP)\_6\_5\_2\_3, m/z:1317.16(3+), RT:33.27, Y-score:92.83

HCD Scan:7937



CID Scan:7938





# Unknown set no. 92, Gzrgtkb gpv<J wo cp'Rruo c'gzra6

NEEYNK(=PEP)\_6\_5\_2\_3, m/z:1317.16(3+), RT:33.51, Y-score:91.80

HCD Scan:7943



CID Scan:7944



Unknown set no. 93, Gzrgtko gpv<J wo cp'Rcuo c'gzra4

ENGTVSR(=PEP)\_5\_4\_0\_2, m/z:989.72(3+), RT:17.88, Y-score:97.26



# Unknown set no. 94, Gzrgtko gpvJ wo cp'Rruo c'gzra5

ENGTVSR(=PEP)\_5\_4\_0\_2, m/z:989.72(3+), RT:18.04, Y-score:95.10

HCD Scan:3350



CID Scan:3353



Unknown set no. 95, Gzrgtko gpv<J wo cp'Rruo c'gzra4

ENGTVSR(=PEP)\_5\_4\_0\_2, m/z:989.72(3+), RT:18.10, Y-score:93.53



# Unknown set no. 96, Gzrgtko gpvJ wo cp'Rcuo c'gzra3

ENGTVSR(=PEP)\_6\_5\_0\_2, m/z:1111.43(3+), RT:16.97, Y-score:93.70

HCD Scan:3103



CID Scan:3108



# Unknown set no. 97, Gzrgtko gpv<J wo cp'Rcuo c'gzra4

ENGTVSR(=PEP)\_6\_5\_0\_2, m/z:1111.43(3+), RT:17.40, Y-score:92.27

HCD Scan:3236



CID Scan:3240



Unknown set no. 98, Gzrgtko gpy<J wo cp'Rkuo c'gzra3

ENGTVSR(=PEP)\_6\_5\_0\_3, m/z:1208.46(3+), RT:26.26, Y-score:91.85

HCD Scan:6028



CID Scan:6030



# Unknown set no. 99, Gzr gklo gpvJ wo cp'Rcuo c'gzra4

ENGTVSR(=PEP)\_6\_5\_0\_3, m/z:1208.47(3+), RT:26.57, Y-score:100.00

CID Scan:6122



CID Scan:6123





# Unknown set no. 100, Gzrgtko gpvJ wo cp'Rcuo c'gzra3

ENGTVSR(=PEP)\_6\_5\_1\_3, m/z:1257.15(3+), RT:26.16, Y-score:89.53

HCD Scan:6004



CID Scan:6005



# Unknown set no. 101, Gzrgtko gpvJ wo cp'Rtuo c'gzra4

ENGTVSR(=PEP)\_6\_5\_1\_3, m/z:1257.15(3+), RT:26.34, Y-score:88.80

### HCD Scan:6118



### CID Scan:6119



# Unknown set no. 102, Gzr gtlk gpvJ wo cp'Rtuo c'gzra5

ENGTVSR(=PEP)\_6\_5\_1\_3, m/z:943.12(4+), RT:26.42, Y-score:90.27

HCD Scan:6037



CID Scan:6041





# Unknown set no. 104, Gzrgtko gpvJ wo cp'Rcuo c'gzra5

ENGTVSR(=PEP)\_6\_5\_1\_3, m/z:1257.15(3+), RT:26.51, Y-score:89.54

HCD Scan:6052



CID Scan:6055



# Unknown set no. 105, Gzrgtko gvwJ wo cp'Rcuo c'gzra5

ENGTVSR(=PEP)\_6\_5\_2\_3, m/z:1305.84(3+), RT:26.28, Y-score:83.59

HCD Scan:5961



CID Scan:5964



# Unknown set no. 106, Gzrgtko gpw'J wo cp'Rucuo c'gzra3

ENGTVSR(=PEP)\_7\_6\_1\_4, m/z:1107.17(4+), RT:40.97, Y-score:87.76

HCD Scan:10093



CID Scan:10095



# Unknown set no. 107, Gzrgtko gwvJ wo cp'Rucuo c'gzra5

ENGTVSR(=PEP)\_7\_6\_1\_4, m/z:1107.17(4+), RT:41.89, Y-score:89.07

HCD Scan:10342



CID Scan:10345





Unknown set no. 108, Gzrgtko gpv<J wo cp'Rtuo c'gzra4

ENGTVSR(=PEP)\_7\_6\_2\_4, m/z:1143.69(4+), RT:42.95, Y-score:84.88

HCD Scan:10864



CID Scan:10867



# Unknown set no. 109, Gzrgtko gpv<J wo cp'Rrcuo c'gzra5

ENGTVSR(=PEP)\_7\_6\_2\_4, m/z:1143.68(4+), RT:41.91, Y-score:82.64

HCD Scan:10389



CID Scan:10390



Unknown set no. 110, Gzrgtko gpv<J wo cp'Rncuo c'gzra5

ENGTVSR(=PEP)\_7\_6\_2\_4, m/z:1143.69(4+), RT:43.10, Y-score:84.65

HCD Scan:10743



CID Scan:10745



Unknown set no. 111, Gzrgtko gpwJ wo cp'Rcuo c'gzra4

ENGTVSR(=PEP)\_7\_6\_3\_4, m/z:1180.20(4+), RT:41.40, Y-score:83.96

HCD Scan:10365



CID Scan:10369



Unknown set no. 112, Gzrgtko gpwJ wo cp'Rcuo c'gzra5

ENGTVSR(=PEP)\_7\_6\_3\_4, m/z:1180.20(4+), RT:41.80, Y-score:87.51

HCD Scan:10347



CID Scan:10349



# Unknown set no. 113, Gzrgtko gpv<J wo cp'Rreuo c'gzra4

ENGTVSR(=PEP)\_7\_6\_3\_4, m/z:1180.20(4+), RT:41.75, Y-score:85.19

HCD Scan:10449



CID Scan:10452



Unknown set no. 114, Gzrgtko gpv<J wo cp'Ræuo c'gzra3

ENGTVSR(=PEP)\_8\_7\_0\_4, m/z:1161.94(4+), RT:41.40, Y-score:81.98



# Unknown set no. 115, Gzrgtko gpvJ wo cp'Rcuo c'gzra4

LVPVPITNATLDR(=PEP)\_5\_4\_0\_2, m/z:904.15(4+), RT:97.60, Y-score:81.80





Unknown set no. 116, Gzrgtk gpv<J wo cp'Rruo c'gzra5

LVPVPITNATLDR(=PEP)\_5\_4\_0\_2, m/z:904.15(4+), RT:97.80, Y-score:81.08



# Unknown set no. 117, Gzrgtko gpv<J wo cp'Rcuo c'gzra4

LVPVPITNATLDR(=PEP)\_5\_4\_0\_2, m/z:904.15(4+), RT:98.76, Y-score:79.68



# Unknown set no. 118, Gzrgtko gpv<J wo cp'Ræuo c'gzra5

LVPVPITNATLDR(=PEP)\_5\_4\_0\_2, m/z:904.15(4+), RT:97.41, Y-score:80.30

HCD Scan:27611



CID Scan:27615



# Unknown set no. 119, Gzrgtko gvwJ wo cp'Rcuo c'gzra3

LVPVPITNATLDR(=PEP)\_6\_5\_0\_2, m/z:995.44(4+), RT:96.21, Y-score:88.69



Unknown set no. 120, Gzrgtko gpvJ wo cp'Rcuo c'gzra5

LVPVPITNATLDR(=PEP)\_6\_5\_0\_2, m/z:995.44(4+), RT:96.37, Y-score:87.37



Unknown set no. 121, Gzrgtko gpv<J wo cp'Rncuo c'gzra5

LVPVPITNATLDR(=PEP)\_6\_5\_0\_2, m/z:995.44(4+), RT:96.79, Y-score:84.74

HCD Scan:27389



CID Scan:27392



# Unknown set no. 122, Gzrgtko gpv<J wo cp'Ræuo c'gzra4

LVPVPITNATLDR(=PEP)\_6\_5\_0\_3, m/z:854.77(5+), RT:110.33, Y-score:80.35

HCD Scan:30810



CID Scan:30813



Unknown set no. 123, Gzrgtko gpvJ wo cp'Rtuo c'gzra4

LVPVPITNATLDR(=PEP)\_6\_5\_0\_3, m/z:1068.21(4+), RT:109.13, Y-score:82.40





# Unknown set no. 124, Gzrgtko gpv<J wo cp'Rrcuo c'gzra4

LVPVPITNATLDR(=PEP)\_6\_5\_1\_3, m/z:1104.73(4+), RT:109.33, Y-score:82.30

HCD Scan:30888



CID Scan:30889



# Unknown set no. 125, Gzrgtko gpv<J wo cp'Ræuo c'gzra4

LVPVPITNATLDR(=PEP)\_6\_5\_1\_3, m/z:1104.73(4+), RT:109.44, Y-score:81.05

HCD Scan:30613



CID Scan:30616



Unknown set no. 126, Gzrgtko gpvJ wo cp'Rtuo c'gzra4

LVPVPITNATLDR(=PEP)\_7\_6\_0\_3, m/z:1159.49(4+), RT:107.65, Y-score:78.32



# Unknown set no. 127, Gzrgtko gpv<J wo cp'Rncuo c'gzra4

QNQCFYNSSYLVNQR(=PEP)\_6\_5\_0\_3, m/z:1196.22(4+), RT:101.65, Y-score:75.27

HCD Scan:29255



CID Scan:29256



# Unknown set no. 128, Gzrgtko gpv<J wo cp'Rruo c'gza5

QNQCFYNSSYLVNQR(=PEP)\_6\_5\_0\_3, m/z:1196.22(4+), RT:101.38, Y-score:77.06

HCD Scan:28393



CID Scan:28394



# Unknown set no. 129, Gzrgtko gpv'J wo cp'Ræuo c'gza3

NGTR(=PEP)\_6\_5\_0\_3, m/z:1103.42(3+), RT:13.49, Y-score:84.67



# Unknown set no. 130, Gzrgtko gpv<J wo cp'Rncuo c'gzra4

NGTR(=PEP)\_6\_5\_0\_3, m/z:1103.42(3+), RT:14.46, Y-score:80.01



Unknown set no. 131, Gzrgtko gpv<J wo cp'Rncuo c'gzra5

NGTR(=PEP)\_6\_5\_0\_3, m/z:1103.42(3+), RT:13.73, Y-score:85.64

HCD Scan:2082



CID Scan:2083





Unknown set no. 132, Gzrgtko gpwJ wo cp'Rucw c'gzra6

NGTR(=PEP)\_6\_5\_0\_3, m/z:1103.09(3+), RT:13.93, Y-score:84.43

HCD Scan:2174



CID Scan:2176



Unknown set no. 133, Gzrgtko gpvJ wo cp'Rruo c'gzra5

NGTR(=PEP)\_6\_5\_0\_3, m/z:1103.42(3+), RT:14.43, Y-score:85.37



# Unknown set no. 134, Gzrgtko gpw'J wo cp'Rtuo c'gzra3

NGTR(=PEP)\_6\_5\_1\_3, m/z:1152.10(3+), RT:14.08, Y-score:80.17

HCD Scan:2169



CID Scan:2172



# Unknown set no. 135, Gzrgtko gpv<J wo cp'Rcuo c'gzra4

NGTR(=PEP)\_6\_5\_1\_3, m/z:1152.10(3+), RT:14.39, Y-score:92.83



# Unknown set no. 136, Gzrgtko gvwJ wo cp'Rrcuo c'gzra6

NGTR(=PEP)\_6\_5\_1\_3, m/z:1152.10(3+), RT:14.47, Y-score:78.47



# Unknown set no. 137, Gzrgtko gpv'J wo cp'Ræuo c'gzra3

YLGNATAIFFLPDEGK(=PEP)\_5\_4\_0\_2, m/z:990.92(4+), RT:127.93, Y-score:90.71



Unknown set no. 138, Gzrgtko gpvJ wo cp'Rcuo c'gzra4

YLGNATAIFFLPDEGK(=PEP)\_5\_4\_0\_2, m/z:990.92(4+), RT:128.12, Y-score:87.83



Unknown set no. 139, Gzrgtko gpv<J wo cp'Rncuo c'gzra5

YLGNATAIFFLPDEGK(=PEP)\_5\_4\_0\_2, m/z:990.92(4+), RT:128.20, Y-score:92.21





Unknown set no. 140, Gzrgtko gpvJ wo cp'Rruo c'gzra6

YLGNATAIFFLPDEGK(=PEP)\_5\_4\_0\_2, m/z:990.92(4+), RT:128.18, Y-score:90.85



# Unknown set no. 141, Gzrgtko gpvJ wo cp'Rcuo c'gzra5

YLGNATAIFFLPDEGK(=PEP)\_5\_4\_0\_2, m/z:990.92(4+), RT:127.88, Y-score:87.01



Unknown set no. 142, Gzrgtko gpvJ wo cp'Rcuo c'gzra3

VCQDCPLLAPLNDTR(=PEP)\_5\_4\_0\_2, m/z:994.91(4+), RT:101.83, Y-score:81.63



# Unknown set no. 143, Gzr gklo gpvJ wo cp'Rxcuo c'gzra6

VCQDCPLLAPLNDTR(=PEP)\_5\_4\_0\_2, m/z:994.91(4+), RT:103.23, Y-score:80.62

HCD Scan:29565



CID Scan:29566



# Unknown set no. 144, Gzrgtko gpv'J wo cp'Rucuo c'gzra5

VCQDCPLLAPLNDTR(=PEP)\_5\_4\_0\_2, m/z:994.91(4+), RT:101.73, Y-score:76.40



# Unknown set no. 145, Gzrgtko gpv'J wo cp'Rucuo c'gzra5

VCQDCPLLAPLNDTR(=PEP)\_5\_4\_1\_2, m/z:1031.43(4+), RT:101.16, Y-score:84.69



Unknown set no. 146, Gzrgtko gpw'J wo cp'Rcuo c'gzra6

VCQDCPLLAPLNDTR(=PEP)\_6\_5\_1\_3, m/z:1195.48(4+), RT:115.61, Y-score:70.80

HCD Scan:31528



CID Scan:31529



# Unknown set no. 147, Gzrgtko gpw'J wo cp'Rucuo c'gzra5

VCQDCPLLAPLNDTR(=PEP)\_6\_5\_1\_3, m/z:1195.48(4+), RT:115.58, Y-score:81.49

HCD Scan:30596



CID Scan:30597





# Unknown set no. 148, Gzrgtko gpv<J wo cp'Rncuo c'gzra5

VPVTLALNNTLFLIEER(=PEP)\_4\_4\_0\_1, m/z:924.18(4+), RT:104.10, Y-score:77.10



Unknown set no. 149, Gzr gtlō gpv'J wo cp'Rtuo c'gzra3

NCTSR(=PEP)\_5\_4\_0\_2, m/z:948.02(3+), RT:11.83, Y-score:83.90



Unknown set no. 150, Gzr gtlb gpvJ wo cp'Rtuo c'gzra4

NCTSR(=PEP)\_5\_4\_0\_2, m/z:948.02(3+), RT:11.84, Y-score:91.12



# Unknown set no. 151, Gzr gtlb gpv<J wo cp'Rncuo c'gzra5

NCTSR(=PEP)\_5\_4\_0\_2, m/z:948.02(3+), RT:11.87, Y-score:90.66



# Unknown set no. 152, Gzrgtko gpvJ wo cp'Rruo c'gzra6

NCTSR(=PEP)\_5\_4\_0\_2, m/z:948.02(3+), RT:11.95, Y-score:91.49



Unknown set no. 153, Gzrgtko gpv'J wo cp'Rncuo c'gzra5

NCTSR(=PEP)\_5\_4\_0\_2, m/z:948.02(3+), RT:11.81, Y-score:89.49



# Unknown set no. 154, Gzr gtlk gpv<J wo cp'Rtuo c'gzra3

NCTSR(=PEP)\_6\_5\_0\_3, m/z:1166.76(3+), RT:17.25, Y-score:81.70



Unknown set no. 155, Gzrgtko gpy<J wo cp'Rruo c'gzra4

NCTSR(=PEP)\_6\_5\_0\_3, m/z:1166.76(3+), RT:17.39, Y-score:84.02

CID Scan:3304



CID Scan:3309





# Unknown set no. 156, Gzrgtko gpv<J wo cp'Rncuo c'gzra5

NCTSR(=PEP)\_6\_5\_0\_3, m/z:1166.76(3+), RT:17.56, Y-score:90.90



# Unknown set no. 157, Gzrgtko gvwJ wo cp'Rruo c'gzra3

ELLETVVNR(=PEP)\_5\_4\_0\_2, m/z:1093.13(3+), RT:84.93, Y-score:79.67

### HCD Scan:25025



### CID Scan:25028



# Unknown set no. 158, Gzrgtko gpv<J wo cp'Rrcuo c'gzra5

ELLETVVNR(=PEP)\_5\_4\_0\_2, m/z:1093.13(3+), RT:84.91, Y-score:80.63

HCD Scan:24777



CID Scan:24778



# Unknown set no. 159, Gzrgtko gpv<J wo cp'Rrcuo c'gzra5

ADGTVNQIEGEATPVNLTEPAK(=PEP)\_5\_4\_0\_1, m/z:1042.71(4+), RT:84.73, Y-score:83.65



Unknown set no. 160, Gzrgtko gpv'J wo cp'Rruo c'gzra4

ADGTVNQIEGEATPVNLTEPAK(=PEP)\_5\_4\_1\_1, m/z:1079.22(4+), RT:84.31, Y-score:83.33



Unknown set no. 161, Gzrgtko gpvJ wo cp'Rtuo c'gzra5

ADGTVNQIEGEATPVNLTEPAK(=PEP)\_5\_4\_1\_1, m/z:1079.22(4+), RT:84.48, Y-score:85.14



# Unknown set no. 162, Gzrgtko gpv<J wo cp'Rruo c'gzra6

ADGTVNQIEGEATPVNLTEPAK(=PEP)\_5\_4\_1\_1, m/z:1079.22(4+), RT:84.52, Y-score:88.08

HCD Scan:25273



CID Scan:25277



Unknown set no. 163, Gzr gto gpwJ wo cp'Rcuo c'gza4

ADGTVNQIEGEATPVNLTEPAK(=PEP)\_5\_4\_1\_2, m/z:1151.99(4+), RT:93.59, Y-score:79.44

HCD Scan:27854



CID Scan:27855





Unknown set no. 164, Gzrgtko gpv<J wo cp'Rrcuo c'gzra5

LGNWSAMPSCK(=PEP)\_5\_4\_0\_2, m/z:864.59(4+), RT:83.18, Y-score:93.04

CID Scan:24426



CID Scan:24430



# Unknown set no. 165, Gzrgtko gpv<J wo cp'Ræuo c'gzra6

LGNWSAMPSCK(=PEP)\_5\_4\_0\_2, m/z:864.59(4+), RT:83.26, Y-score:98.11

HCD Scan:24916



CID Scan:24919



# Unknown set no. 166, Gzrgtko gpv<J wo cp'Rrcuo c'gzra4

VYKPSAGNNSLYR(=PEP)\_4\_3\_0\_1, m/z:1006.44(3+), RT:56.72, Y-score:83.58



Unknown set no. 167, Gzrgtko gpv<J wo cp'Rrcuo c'gzra6

VYKPSAGNNSLYR(=PEP)\_6\_5\_1\_3, m/z:1119.71(4+), RT:63.99, Y-score:71.99

CID Scan:18456



CID Scan:18459



# Unknown set no. 168, Gzr gtlb gpv<J wo cp'Rtuo c'gzra5

FNDTEVLQR(=PEP)\_5\_4\_0\_2, m/z:1109.45(3+), RT:75.97, Y-score:86.32



# Unknown set no. 169, Gzrgtk gpv<J wo cp'Ricu c'gza3

NPVGLIGAENATGETDPSHSK(=PEP)\_6\_5\_0\_3, m/z:1239.51(4+), RT:82.46, Y-score:78.38

HCD Scan:24312



CID Scan:24313



# Unknown set no. 170, Gzrgtko gvwJ wo cp'Rruo c'gzra5

AGLQAFFQVQECNK(=PEP)\_5\_4\_0\_2, m/z:961.90(4+), RT:108.31, Y-score:96.32



# Unknown set no. 171, Gzrgtko gw<J wo cp'Rrcuo c'gzra6

AGLQAFFQVQECNK(=PEP)\_5\_4\_0\_2, m/z:961.90(4+), RT:108.30, Y-score:86.37

HCD Scan:30412



CID Scan:30413





# Unknown set no. 172, Gzrgtko gpv<J wo cp'Rncuo c'gzra5

EHEGAIYPDNTTDFQR(=PEP)\_4\_3\_0\_1, m/z:1147.80(3+), RT:70.73, Y-score:84.13

HCD Scan:20503



CID Scan:20507



# Unknown set no. 173, Gzrgtko gpy'J wo cp'Rncuo c'gzra5

EHEGAIYPDNTTDFQR(=PEP)\_4\_3\_1\_1, m/z:1196.49(3+), RT:70.01, Y-score:86.46



# Unknown set no. 174, Gzrgtko gpvJ wo cp'Rcuo c'gzra4

ELHHLQEQNVSNFLDK(=PEP)\_5\_4\_0\_2, m/z:1057.45(4+), RT:71.98, Y-score:78.18



# Unknown set no. 175, Gzr gtlb gpv<J wo cp'Rtuo c'gzra4

ELHHLQEQNVSNFLDK(=PEP)\_5\_4\_1\_2, m/z:1093.97(4+), RT:71.04, Y-score:77.84



# Unknown set no. 176, Gzrgtko gpv<J wo cp'Rncuo c'gzra3

ENLTAPGSDSAVFFEQGTTTR(=PEP)\_5\_4\_0\_2, m/z:1083.70(4+), RT:103.12, Y-score:95.07

HCD Scan:29128



CID Scan:29132



Unknown set no. 177, Gzrgtko gpy<J wo cp'Rrcuo c'gzra4

ENLTAPGSDSAVFFEQGTTTR(=PEP)\_5\_4\_0\_2, m/z:1083.70(4+), RT:103.34, Y-score:94.64

HCD Scan:29870



CID Scan:29871



# Unknown set no. 178, Gzrgtko gpv<J wo cp'Rcuo c'gzra5

ENLTAPGSDSAVFFEQGTTR(=PEP)\_5\_4\_0\_2, m/z:1083.70(4+), RT:103.72, Y-score:93.43

HCD Scan:29402



CID Scan:29403



Unknown set no. 179, Gzrgtko gpvzJ wo cp'Rncuo c'gzra6

ENLTAPGSDSAVFFEQGTTR(=PEP)\_5\_4\_0\_2, m/z:1083.70(4+), RT:103.49, Y-score:91.26

HCD Scan:29624



CID Scan:29625





Unknown set no. 180, Gzrgtko gpv<J wo cp'Rncuo c'gzra5

ENLTAPGSDSAVFFEQGTTR(=PEP)\_5\_4\_0\_2, m/z:1083.70(4+), RT:103.11, Y-score:98.45

HCD Scan:28713



CID Scan:28716



# Unknown set no. 181, Gzrgtko gpv<J wo cp'Rncuo c'gzra3

DNNSIITR(=PEP)\_5\_4\_0\_1, m/z:949.39(3+), RT:45.38, Y-score:94.78



Unknown set no. 182, Gzrgtko gpv'J wo cp'Rueo c'gzra4

DNNSIITR(=PEP)\_5\_4\_0\_1, m/z:949.39(3+), RT:45.46, Y-score:93.55



# Unknown set no. 183, Gzrgtko gpv<J wo cp'Rncuo c'gzra5

DNNSIITR(=PEP)\_5\_4\_0\_1, m/z:949.39(3+), RT:45.69, Y-score:93.77



Unknown set no. 184, Gzrgtko gpvJ wo cp'Rtuo c'gzra5

DNNSIITR(=PEP)\_5\_4\_0\_2, m/z:1046.42(3+), RT:57.99, Y-score:94.51



# Unknown set no. 185, Gzrgtko gpvJ wo cp'Rcuo c'gzra3

DNYTK(=PEP)\_5\_4\_0\_2, m/z:949.03(3+), RT:21.41, Y-score:92.28



# Unknown set no. 186, Gzrgtko gpv<J wo cp'Rrcuo c'gzra4

DNYTK(=PEP)\_5\_4\_0\_2, m/z:949.03(3+), RT:21.52, Y-score:94.98



# Unknown set no. 187, Gzrgtko gpv<J wo cp'Rncuo c'gzra5

DNYTK(=PEP)\_5\_4\_0\_2, m/z:949.03(3+), RT:21.71, Y-score:91.83





# Unknown set no. 188, Gzrgtko gvwJ wo cp'Rrcuo c'gzra4

DNYTK(=PEP)\_5\_4\_0\_2, m/z:949.03(3+), RT:21.78, Y-score:94.32



# Unknown set no. 189, Gzr gtlk gpvJ wo cp'Rtuo c'gzra5

DNYTK(=PEP)\_5\_4\_0\_2, m/z:949.03(3+), RT:21.80, Y-score:94.79

HCD Scan:4513



CID Scan:4514



Unknown set no. 190, Gzr gtlb gpv<J wo cp'Rncuo c'gzra4

ENETEIIK(=PEP)\_5\_4\_0\_2, m/z:1060.77(3+), RT:60.50, Y-score:86.43



# Unknown set no. 191, Gzr gtlk gpvJ wo cp'Rtuo c'gzra5

ENETEIIK(=PEP)\_5\_4\_0\_2, m/z:1060.77(3+), RT:60.56, Y-score:83.99



# Unknown set no. 192, Gzrgtko gpv<J wo cp'Rrcuo c'gzra3

EDALNETR(=PEP)\_5\_4\_0\_2, m/z:1051.41(3+), RT:49.30, Y-score:78.63



# Unknown set no. 193, Gzrgtko gpv'J wo cp'Rncuo c'gzra3

EDALNETR(=PEP)\_6\_5\_0\_3, m/z:1270.15(3+), RT:59.45, Y-score:91.56



# Unknown set no. 194, Gzrgtko gpv<J wo cp'Rrcuo c'gzra5

EDALNETR(=PEP)\_6\_5\_1\_3, m/z:989.38(4+), RT:59.64, Y-score:83.60

HCD Scan:16374



CID Scan:16379



# Unknown set no. 195, Gzrgtko gpv<J wo cp'Rrcuo c'gzra4

EDALNETR(=PEP)\_6\_5\_1\_3, m/z:1318.84(3+), RT:59.67, Y-score:87.67

HCD Scan:16702



CID Scan:16705





# Unknown set no. 196, Gzrgtko gpv<J wo cp'Rncuo c'gzra5

EDALNETR(=PEP)\_6\_5\_1\_3, m/z:1318.84(3+), RT:59.72, Y-score:86.85

HCD Scan:16426



CID Scan:16430



Unknown set no. 197, Gzrgtko gw'J wo cp'Rruo c'gza5

HNSTGCLR(=PEP)\_6\_5\_0\_3, m/z:952.12(4+), RT:24.32, Y-score:81.89



Unknown set no. 198, Gzrgtko gpvJ wo cp'Rruo c'gzra5

HNSTGCLR(=PEP)\_6\_5\_0\_3, m/z:1269.15(3+), RT:24.76, Y-score:88.73



# Unknown set no. 199, Gzrgtko gpv'J wo cp'Rncuo c'gzra3

LANLTQGEDQYYLR(=PEP)\_5\_4\_0\_2, m/z:972.91(4+), RT:92.84, Y-score:86.40

HCD Scan:27041



CID Scan:27042



# Unknown set no. 200, Gzrgtko gpy<J wo cp'Rncuo c'gzra4

LANLTQGEDQYYLR(=PEP)\_5\_4\_0\_2, m/z:972.91(4+), RT:92.95, Y-score:87.69



# Unknown set no. 201, Gzr gtlk gpvJ wo cp'Rcuo c'gzra5

LANLTQGEDQYYLR(=PEP)\_5\_4\_0\_2, m/z:972.91(4+), RT:93.01, Y-score:83.06

### HCD Scan:27147



### CID Scan:27148



# Unknown set no. 202, Gzrgtko gpv'J wo cp'Rtuo c'gzra4

LANLTQGEDQYYLR(=PEP)\_5\_4\_0\_2, m/z:972.91(4+), RT:93.16, Y-score:91.88



Unknown set no. 203, Gzrgtko gpwJ wo cp'Rncuo c'gzra5

LANLTQGEDQYYLR(=PEP)\_5\_4\_0\_2, m/z:972.91(4+), RT:92.65, Y-score:87.90





# Unknown set no. 204, Gzr gtlk gpvJ wo cp'Rcuo c'gza4

LANLTQGEDQYYLR(=PEP)\_6\_5\_1\_3, m/z:1173.48(4+), RT:104.03, Y-score:95.14

HCD Scan:29997



CID Scan:29998



# Unknown set no. 205, Gzrgtko gpv<J wo cp'Rrcuo c'gza5

LANLTQGEDQYYLR(=PEP)\_6\_5\_1\_3, m/z:1173.48(4+), RT:104.08, Y-score:83.15

HCD Scan:29472



CID Scan:29473



# Unknown set no. 206, Gzrgtko gpv<J wo cp'Rrcuo c'gzra4

LANLTQGEDQYYLR(=PEP)\_6\_5\_1\_3, m/z:1173.48(4+), RT:104.25, Y-score:79.03

HCD Scan:29764



CID Scan:29768



Unknown set no. 207, Gzrgtko gpv<J wo cp'Rrcuo c'gzra3

NHSCEPCQTLAVR(=PEP)\_5\_4\_0\_2, m/z:944.88(4+), RT:53.87, Y-score:79.80



Unknown set no. 208, Gzrgtko gpy<J wo cp'Rncuo c'gzra3

NHSCEPCQTLAVR(=PEP)\_5\_4\_0\_2, m/z:1259.50(3+), RT:53.91, Y-score:81.27

HCD Scan:14338



CID Scan:14340



Unknown set no. 209, Gzrgtko gvw'J wo cp'Rruo c'gzra4

NHSCEPCQTLAVR(=PEP)\_5\_4\_0\_2, m/z:944.88(4+), RT:53.85, Y-score:78.22



# Unknown set no. 210, Gzrgtko gpw<J wo cp'Rrcuo c'gzra4

NHSCEPCQTLAVR(=PEP)\_5\_4\_0\_2, m/z:1259.50(3+), RT:54.01, Y-score:81.85

HCD Scan:14617



CID Scan:14620



Unknown set no. 211, Gzrgtk gpv<J wo cp'Rruo c'gzra5

NHSCEPCQTLAVR(=PEP)\_5\_4\_0\_2, m/z:944.88(4+), RT:53.86, Y-score:81.62

CID Scan:14355



CID Scan:14357





# Unknown set no. 212, Gzrgtko gpv'J wo cp'Rcuo c'gzra5

NHSCEPCQTLAVR(=PEP)\_5\_4\_0\_2, m/z:1259.50(3+), RT:53.77, Y-score:81.92



Unknown set no. 213, Gzr gtlk gpvJ wo cp'Rtuo c'gzra6

NHSCEPCQTLAVR(=PEP)\_5\_4\_0\_2, m/z:944.88(4+), RT:54.15, Y-score:80.70



Unknown set no. 214, Gzrgtko gpvJ wo cp'Rrcuo c'gzra6

NHSCEPCQTLAVR(=PEP)\_5\_4\_0\_2, m/z:1259.50(3+), RT:54.14, Y-score:82.64

HCD Scan:14643



CID Scan:14646



Unknown set no. 215, Gzrgtk gpv<J wo cp'Rrcuo c'gzra5

NHSCEPCQTLAVR(=PEP)\_5\_4\_0\_2, m/z:944.88(4+), RT:54.14, Y-score:81.27

CID Scan:14389



CID Scan:14392



Unknown set no. 216, Gzrgtko gpv<J wo cp'Rrcuo c'gzra4

NVTAEQAR(=PEP)\_5\_4\_0\_1, m/z:934.72(3+), RT:16.73, Y-score:84.82

HCD Scan:3040



CID Scan:3044



Unknown set no. 217, Gzrgtko gpv<J wo cp'Rncuo c'gzra5

NVTAEQAR(=PEP)\_5\_4\_0\_1, m/z:934.72(3+), RT:16.80, Y-score:91.50



# Unknown set no. 218, Gzrgtko gpv'J wo cp'Ræuo c'gzra3

NVTAEQAR(=PEP)\_5\_4\_0\_2, m/z:1031.75(3+), RT:25.36, Y-score:91.83



Unknown set no. 219, Gzrgtko gvwJ wo cp'Ræuo c'gza4

NVTAEQAR(=PEP)\_5\_4\_0\_2, m/z:1031.75(3+), RT:25.68, Y-score:89.09





# Unknown set no. 220, Gzrgtko gpv<J wo cp'Rucuo c'gzra5

NVTAEQAR(=PEP)\_5\_4\_0\_2, m/z:1031.75(3+), RT:25.77, Y-score:86.05



Unknown set no. 221, Gzrgtko gpwJ wo cp'Rxcuo c'gzra5

NVTAEQAR(=PEP)\_5\_4\_0\_2, m/z:1031.75(3+), RT:25.90, Y-score:90.35

CID Scan:5804



CID Scan:5807



# Unknown set no. 222, Gzrgtko gpv<J wo cp'Ræuo c'gzra5

NVTAEQAR(=PEP)\_6\_5\_0\_3, m/z:1250.49(3+), RT:41.20, Y-score:91.95



Unknown set no. 223, Gzrgtk gpvJ wo cp'Rcuo c'gzra3

NYTLTGR(=PEP)\_5\_4\_1\_2, m/z:1059.09(3+), RT:60.01, Y-score:85.58



Unknown set no. 224, Gzrgtko gpv<J wo cp'Rncuo c'gzra4

NYTLTGR(=PEP)\_5\_4\_1\_2, m/z:1059.09(3+), RT:60.04, Y-score:87.72



Unknown set no. 225, Gzrgtko gpv<J wo cp'Rcuo c'gzra5

NYTLTGR(=PEP)\_5\_4\_1\_2, m/z:1059.09(3+), RT:60.21, Y-score:86.08

HCD Scan:16584



CID Scan:16589



Unknown set no. 226, Gzrgtko gpv<J wo cp'Rrcuo c'gzra4

NYTLTGR(=PEP)\_5\_4\_1\_2, m/z:1059.09(3+), RT:60.32, Y-score:86.01



# Unknown set no. 227, Gzrgtko gpvJ wo cp'Rcuo c'gzra5

NYTLTGR(=PEP)\_5\_4\_1\_2, m/z:1059.09(3+), RT:60.28, Y-score:86.19





Unknown set no. 228, Gzrgtko gpv'J wo cp'Rncuo c'gzra3

GGSSGWSGGLAQNR(=PEP)\_5\_4\_0\_2, m/z:885.36(4+), RT:67.31, Y-score:88.23

HCD Scan:19511



CID Scan:19516



Unknown set no. 229, Gzrgtko gpv<J wo cp'Ræuo c'gzra5

GGSSGWSGGLAQNR(=PEP)\_5\_4\_0\_2, m/z:885.36(4+), RT:67.29, Y-score:89.94

HCD Scan:19268



CID Scan:19270



# Unknown set no. 230, Gzrgtko gpv'J wo cp'Rtuo c'gzra5

GGSSGWSGGLAQNR(=PEP)\_5\_4\_0\_2, m/z:885.36(4+), RT:67.16, Y-score:84.93



Unknown set no. 231, Gzrgtko gpv<J wo cp'Ræuo c'gzra3

NVTEK(=PEP)\_4\_3\_0\_1, m/z:1069.93(2+), RT:14.00, Y-score:94.66

HCD Scan:2148



CID Scan:2149



Unknown set no. 232, Gzrgtko gpv<J wo cp'Rruo c'gzra4

NVTEK(=PEP)\_4\_3\_0\_1, m/z:1069.93(2+), RT:14.50, Y-score:92.02

HCD Scan:2304



CID Scan:2309



Unknown set no. 233, Gzrgtko gpv<J wo cp'Rncuo c'gzra5

NVTEK(=PEP)\_4\_3\_0\_1, m/z:1069.93(2+), RT:14.35, Y-score:94.06



# Unknown set no. 234, Gzrgtko gpv<J wo cp'Rrcuo c'gzra3

NVTEK(=PEP)\_5\_4\_0\_2, m/z:932.37(3+), RT:13.89, Y-score:92.46

### HCD Scan:2115



### CID Scan:2116



Unknown set no. 235, Gzr gt kō gp<J wo cp'Ricu c'gza3

NVTEK(=PEP)\_5\_4\_0\_2, m/z:1398.05(2+), RT:13.92, Y-score:87.51

HCD Scan:2126



CID Scan:2128





Unknown set no. 236, Gzrgtko gpv<J wo cp'Rrcuo c'gzra4

NVTEK(=PEP)\_5\_4\_0\_2, m/z:932.37(3+), RT:14.37, Y-score:86.80

CID Scan:2271



CID Scan:2272



# Unknown set no. 237, Gzrgtko gpv<J wo cp'Ræuo c'gzra5

NVTEK(=PEP)\_5\_4\_0\_2, m/z:932.37(3+), RT:14.12, Y-score:90.86

HCD Scan:2161



CID Scan:2162



# Unknown set no. 238, Gzrgtko gpv'J wo cp'Rucuo c'gzra4

NVTEK(=PEP)\_5\_4\_0\_2, m/z:932.37(3+), RT:14.37, Y-score:84.23

HCD Scan:2272



CID Scan:2273



Unknown set no. 239, Gzrgtko gpv<J wo cp'Ræuo c'gzra5

NVTEK(=PEP)\_5\_4\_0\_2, m/z:932.37(3+), RT:14.70, Y-score:92.73

HCD Scan:2286



CID Scan:2287



Unknown set no. 240, Gzr gtlk gpv<J wo cp'Rtuo c'gzra3

FVQGNSTEVACHPGYGLPK(=PEP)\_5\_4\_0\_2, m/z:1067.20(4+), RT:73.01, Y-score:78.32

HCD Scan:21590



CID Scan:21593



# Unknown set no. 241, Gzrgtko gpw'J wo cp'Rncuo c'gzra4

FVQGNSTEVACHPGYGLPK(=PEP)\_5\_4\_0\_2, m/z:1067.20(4+), RT:73.13, Y-score:80.88

HCD Scan:21898



CID Scan:21901



# Unknown set no. 242, Gzrgtko gpv<J wo cp'Rcuo c'gzra5

FLNNGTCTAEGK(=PEP)\_5\_4\_0\_2, m/z:879.85(4+), RT:55.75, Y-score:88.03

HCD Scan:15009



CID Scan:15012



# Unknown set no. 243, Gzrgtk gpv<J wo cp'Rruw c'gzra5

FLNNGTCTAEGK(=PEP)\_5\_4\_0\_2, m/z:879.85(4+), RT:55.95, Y-score:92.48

HCD Scan:15046



CID Scan:15048





Unknown set no. 244, Gzrgtko gpy<J wo cp'Rcuo c'gzra4

NGTAVCATNR(=PEP)\_5\_4\_0\_1, m/z:993.07(3+), RT:17.81, Y-score:91.30



# Unknown set no. 245, Gzrgtko gpvJ wo cp'Ræuo c'gzra3

NGTAVCATNR(=PEP)\_5\_4\_0\_2, m/z:1090.10(3+), RT:28.10, Y-score:93.50

HCD Scan:6678



CID Scan:6679



# Unknown set no. 246, Gzrgtko gpvJ wo cp'Rruo c'gzra4

NGTAVCATNR(=PEP)\_5\_4\_0\_2, m/z:1090.10(3+), RT:27.82, Y-score:92.48



Unknown set no. 247, Gzrgtko gpvJ wo cp'Rcuo c'gzra5

NGTAVCATNR(=PEP)\_5\_4\_0\_2, m/z:1090.10(3+), RT:28.60, Y-score:93.00

HCD Scan:6785



CID Scan:6787



# Unknown set no. 248, Gzrgtko gpvJ wo cp'Rxcuo c'gzra4

NGTAVCATNR(=PEP)\_5\_4\_0\_2, m/z:1090.10(3+), RT:28.63, Y-score:92.01

HCD Scan:6834



CID Scan:6836



# Unknown set no. 249, Gzrgtko gpv<J wo cp'Rucuo c'gzra5

NGTAVCATNR(=PEP)\_5\_4\_0\_2, m/z:1090.10(3+), RT:28.61, Y-score:93.66

HCD Scan:6773



CID Scan:6774



Unknown set no. 250, Gzrgtko gpv<J wo cp'Rncuo c'gzra4

ANYTILK(=PEP)\_5\_4\_0\_1, m/z:912.72(3+), RT:61.87, Y-score:93.05



# Unknown set no. 251, Gzrgtko gpvJ wo cp'Rccuo c'gzra4

ANYTILK(=PEP)\_5\_4\_0\_2, m/z:1009.75(3+), RT:74.72, Y-score:94.57

HCD Scan:22611



CID Scan:22615





# Unknown set no. 252, Gzrgtko gpv'J wo cp'Rtuo c'gzra4

ANYTILK(=PEP)\_5\_4\_0\_2, m/z:1009.75(3+), RT:74.94, Y-score:92.23

HCD Scan:22563



CID Scan:22567



# Unknown set no. 253, Gzrgtko gpv<J wo cp'Rncuo c'gzra5

DLEITNATLQSEEDSR(=PEP)\_4\_3\_0\_1, m/z:1123.81(3+), RT:84.70, Y-score:96.74



# Unknown set no. 254, Experiment: Human Plasma exp\_4

DLEITNATLQSEEDSR(=PEP)\_5\_4\_0\_2, m/z:1007.16(4+), RT:85.62, Y-score:71.59



Unknown set no. 255, Gzrgtko gpv<J wo cp'Ræuo c'gzra3

VLYLAAYNCTLRPVSK(=PEP)\_5\_4\_0\_1, m/z:946.18(4+), RT:83.93, Y-score:77.95



Unknown set no. 256, Gzrgtko gpv'J wo cp'Rncuo c'gzra3

VELEDFNGNR(=PEP)\_5\_4\_1\_2, m/z:1181.80(3+), RT:76.98, Y-score:95.74

HCD Scan:22835



CID Scan:22837



Unknown set no. 257, Gzrgtko gpv<J wo cp'Rruo c'gzra6

VELEDFNGNR(=PEP)\_5\_4\_1\_2, m/z:1181.80(3+), RT:77.33, Y-score:87.35

HCD Scan:23284



CID Scan:23285



Unknown set no. 258, Gzrgtko gpvJ wo cp'Rrcuo c'gzra4

MVSHHNLTTGATLINEQWLLTTAK(=PEP)\_5\_4\_0\_2, m/z:1221.80(4+), RT:100.10, Y-score:77.93



# Unknown set no. 259, Gzrgtko gpwJ wo cp'Rucuo c'gzra3

VVLHPNYSQVDIGLIK(=PEP)\_4\_3\_0\_1, m/z:1115.19(3+), RT:96.98, Y-score:83.29





# Unknown set no. 260, Gzrgtko gpv'J wo cp'Rncuo c'gzra4

VVLHPNYSQVDIGLIK(=PEP)\_4\_3\_0\_1, m/z:1115.19(3+), RT:97.11, Y-score:87.97



# Unknown set no. 261, Gzrgtko gpv<J wo cp'Rncuo c'gzra4

VVLHPNYSQVDIGLIK(=PEP)\_5\_4\_0\_1, m/z:927.93(4+), RT:88.74, Y-score:78.43



# Unknown set no. 262, Gzrgtko gpvJ wo cp'Rcuo c'gzra6

VVLHPNYSQVDIGLIK(=PEP)\_5\_4\_0\_1, m/z:927.93(4+), RT:88.60, Y-score:80.44



# Unknown set no. 263, Gzrgtko gw'J wo cp'Rruo c'gzra3

VVLHPNYSQVDIGLIK(=PEP)\_5\_4\_0\_2, m/z:800.76(5+), RT:97.17, Y-score:80.90

HCD Scan:27823



CID Scan:27827



# Unknown set no. 264, Gzrgtko gvwJ wo cp'Rrcuo c'gzra3

VVLHPNYSQVDIGLIK(=PEP)\_5\_4\_0\_2, m/z:1000.70(4+), RT:97.53, Y-score:78.97



Unknown set no. 265, Gzrgtko gpvJ wo cp'Rcuo c'gzra4

VVLHPNYSQVDIGLIK(=PEP)\_5\_4\_0\_2, m/z:1000.70(4+), RT:97.82, Y-score:78.56



# Unknown set no. 266, Gzrgtko gpy<J wo cp'Ræuo c'gzra6

VVLHPNYSQVDIGLIK(=PEP)\_5\_4\_0\_2, m/z:800.76(5+), RT:97.26, Y-score:71.66

### HCD Scan:28200



### CID Scan:28201



Unknown set no. 267, Gzrgtko gpw<J wo cp'Rcuo c'gzra6

VVLHPNYSQVDIGLIK(=PEP)\_5\_4\_0\_2, m/z:1000.70(4+), RT:97.77, Y-score:78.33





Unknown set no. 268, Gzrgtko gpv<J wo cp'Rrcuo c'gzra5

VVLHPNYSQVDIGLIK(=PEP)\_5\_4\_0\_2, m/z:1000.70(4+), RT:97.41, Y-score:78.54



Unknown set no. 269, Gzrgtko gpw'J wo cp'Rcuo c'gzra6

VVLHPNYSQVDIGLIK(=PEP)\_6\_4\_0\_1, m/z:968.44(4+), RT:88.54, Y-score:77.45



# Unknown set no. 270, Gzrgtk gpv<J wo cp'Rrcuo c'gzra3

VVLHPNYSQVDIGLIK(=PEP)\_6\_5\_0\_2, m/z:1091.99(4+), RT:96.55, Y-score:77.70



Unknown set no. 271, Gzrgtko gpv<J wo cp'Rrcuo c'gzra6

VVLHPNYSQVDIGLIK(=PEP)\_6\_5\_0\_3, m/z:1164.76(4+), RT:107.12, Y-score:77.51



Unknown set no. 272, Gzrgtko gpw'J wo cp'Rcuo c'gzra5

VVLHPNYSQVDIGLIK(=PEP)\_6\_5\_0\_3, m/z:1164.76(4+), RT:106.05, Y-score:76.84



Unknown set no. 273, Gzrgtko gpwJ wo cp'Rxcuo c'gzra6

VVLHPNYSQVDIGLIK(=PEP)\_6\_5\_1\_3, m/z:1201.28(4+), RT:105.99, Y-score:71.80

HCD Scan:30055



CID Scan:30058



# Unknown set no. 274, Gzrgtko gpv<J wo cp'Rtuo c'gzra4

ALPQPQNVTSLLGCTH(=PEP)\_4\_3\_0\_1, m/z:1095.48(3+), RT:109.07, Y-score:83.11



# Unknown set no. 275, Gzrgtko gpv<J wo cp'Rrcuo c'gzra5

ALPQPQNVTSLLGCTH(=PEP)\_4\_3\_0\_1, m/z:1095.48(3+), RT:109.16, Y-score:87.28





Unknown set no. 276, Gzrgtko gpw'J wo cp'Rruo c'gzra3

ALPQPQNVTSLLGCTH(=PEP)\_5\_4\_0\_2, m/z:985.92(4+), RT:109.75, Y-score:84.44



# Unknown set no. 277, Gzrgtko gpv<J wo cp'Rucuo c'gzra4

ALPQPQNVTSLLGCTH(=PEP)\_5\_4\_0\_2, m/z:985.92(4+), RT:109.39, Y-score:85.20



# Unknown set no. 278, Gzrgtko gpvJ wo cp'Rrcuo c'gzra5

ALPQPQNVTSLLGCTH(=PEP)\_5\_4\_0\_2, m/z:985.92(4+), RT:110.11, Y-score:85.89

HCD Scan:30490



CID Scan:30491



Unknown set no. 279, Gzrgtko gpvJ wo cp'Rcuo c'gza6

ALPQPQNVTSLLGCTH(=PEP)\_5\_4\_0\_2, m/z:985.92(4+), RT:108.92, Y-score:82.76



Unknown set no. 280, Gzrgtko gpv<J wo cp'Rcuo c'gzra5

ALPQPQNVTSLLGCTH(=PEP)\_5\_4\_0\_2, m/z:985.92(4+), RT:109.74, Y-score:87.53



Unknown set no. 281, Gzrgtko gpvJ wo cp'Rcuo c'gzra3

SWPAVGNCSSALR(=PEP)\_5\_4\_0\_1, m/z:1106.79(3+), RT:75.84, Y-score:89.50

HCD Scan:22529



CID Scan:22530



Unknown set no. 282, Gzrgtko gpv<J wo cp'Rtuo c'gzra3

SWPAVGNCSALR(=PEP)\_5\_4\_0\_2, m/z:903.12(4+), RT:86.20, Y-score:83.12

HCD Scan:25390



CID Scan:25393



Unknown set no. 283, Gzrgtko gpvJ wo cp'Rcuo c'gzra4

SWPAVGNCSALR(=PEP)\_5\_4\_0\_2, m/z:903.12(4+), RT:86.28, Y-score:83.84





# Unknown set no. 284, Gzrgtko gpv'J wo cp'Rncuo c'gzra5

SWPAVGNCSALR(=PEP)\_5\_4\_0\_2, m/z:903.12(4+), RT:86.85, Y-score:83.30



Unknown set no. 285, Gzrgtko gpv<J wo cp'Ræuo c'gzra6

SWPAVGNCSALR(=PEP)\_5\_4\_0\_2, m/z:903.12(4+), RT:86.37, Y-score:89.06

HCD Scan:25831



CID Scan:25835



# Unknown set no. 286, Gzrgtko gpv<J wo cp'Ræuo c'gzra5

SWPAVGNCSALR(=PEP)\_5\_4\_0\_2, m/z:903.12(4+), RT:86.68, Y-score:86.32



# Unknown set no. 287, Gzrgtko gpvJ wo cp'Rcuo c'gzra4

SWPAVGNCSALR(=PEP)\_5\_4\_1\_2, m/z:939.63(4+), RT:86.01, Y-score:82.72

HCD Scan:25762



CID Scan:25764



Unknown set no. 288, Gzrgtko gpv<J wo cp'Rucuo c'gzra6

SWPAVGNCSALR(=PEP)\_5\_4\_1\_2, m/z:939.63(4+), RT:86.15, Y-score:76.91

HCD Scan:25749



CID Scan:25753



# Unknown set no. 289, Gzrgtko gpwJ wo cp'Rcuo c'gzra5

SWPAVGNCSALR(=PEP)\_5\_4\_1\_2, m/z:939.63(4+), RT:85.81, Y-score:83.78

HCD Scan:24980



CID Scan:24981



# Unknown set no. 290, Gzrgtko gpv'J wo cp'Rncuo c'gzra5

SWPAVGNCSALR(=PEP)\_6\_5\_0\_2, m/z:994.40(4+), RT:85.57, Y-score:88.45

HCD Scan:25157



CID Scan:25158



# Unknown set no. 291, Gzrgtko gpv'J wo cp'Rtuo c'gzra6

SWPAVGNCSSALR(=PEP)\_6\_5\_1\_3, m/z:1103.69(4+), RT:97.98, Y-score:78.31

HCD Scan:28466



CID Scan:28467





Unknown set no. 292, Gzrgtko gpw'J wo cp'Rtuo c'gzra3

DFVNASSK(=PEP)\_5\_4\_0\_2, m/z:1024.74(3+), RT:55.83, Y-score:91.29



# Unknown set no. 293, Gzrgtko gpwJ wo cp'Rtuo c'gzra3

DFVNASSK(=PEP)\_5\_4\_0\_2, m/z:1536.60(2+), RT:55.74, Y-score:78.74

HCD Scan:15004



CID Scan:15007



Unknown set no. 294, Gzrgtko gpvJ wo cp'Rcuo c'gzra4

DFVNASSK(=PEP)\_5\_4\_0\_2, m/z:1024.74(3+), RT:55.94, Y-score:90.77



Unknown set no. 295, Gzrgtko gvw'J wo cp'Rruo c'gzra5

DFVNASSK(=PEP)\_5\_4\_0\_2, m/z:1024.74(3+), RT:55.87, Y-score:91.10



Unknown set no. 296, Gzrgtko gpwJ wo cp'Rxcuo c'gzra4

DFVNASSK(=PEP)\_5\_4\_0\_2, m/z:1024.74(3+), RT:56.07, Y-score:90.11



Unknown set no. 297, Gzrgtko gpv<J wo cp'Rrcuo c'gzra4

DFVNASSK(=PEP)\_5\_4\_0\_2, m/z:1536.60(2+), RT:56.08, Y-score:89.85

CID Scan:15379



CID Scan:15384



# Unknown set no. 298, Gzrgtkb gpv<J wo cp'Rruo c'gzra5

DFVNASSK(=PEP)\_5\_4\_0\_2, m/z:1536.60(2+), RT:56.20, Y-score:76.55

### HCD Scan:15142



### CID Scan:15145



# Unknown set no. 299, Gzr gtlk gpv J wo cp'Rtuo c'gzra3

DFVNASSK(=PEP)\_6\_5\_0\_3, m/z:1243.48(3+), RT:69.14, Y-score:79.08

HCD Scan:20217



CID Scan:20220





Unknown set no. 300, Gzrgtko gpv<J wo cp'Rruo c'gzra4

DFVNASSK(=PEP)\_6\_5\_0\_3, m/z:1243.48(3+), RT:69.36, Y-score:87.41

HCD Scan:20657



CID Scan:20659



# Unknown set no. 301, Gzrgtko gpv'J wo cp'Rucuo c'gzra5

DFVNASSK(=PEP)\_6\_5\_0\_3, m/z:1243.48(3+), RT:69.42, Y-score:84.57

HCD Scan:20037



CID Scan:20040



Unknown set no. 302, Gzrgtko gpvJ wo cp'Rxcuo c'gzra4

DFVNASSK(=PEP)\_6\_5\_0\_3, m/z:1243.48(3+), RT:69.43, Y-score:94.60

HCD Scan:20536



CID Scan:20540



# Unknown set no. 303, Gzrgtko gpv<J wo cp'Rruo c'gzra5

DFVNASSK(=PEP)\_6\_5\_0\_3, m/z:1243.48(3+), RT:69.26, Y-score:84.72

HCD Scan:20267



CID Scan:20269



# Unknown set no. 304, Gzrgtko gpv<J wo cp'Rrcuo c'gzra3

NLSMPLLPADPHK(=PEP)\_5\_4\_0\_2, m/z:922.64(4+), RT:103.68, Y-score:96.40

HCD Scan:29226



CID Scan:29227



Unknown set no. 305, Gzrgtko gpv<J wo cp'Rrcuo c'gzra4

NLSMPLLPADPHK(=PEP)\_5\_4\_0\_2, m/z:922.65(4+), RT:103.76, Y-score:98.72

CID Scan:29949



CID Scan:29952



Unknown set no. 306, Gzrgtko gpv<J wo cp'Rncuo c'gzra4

NLSMPLLPADPHK(=PEP)\_5\_4\_0\_2, m/z:922.64(4+), RT:103.86, Y-score:91.49

HCD Scan:29697



CID Scan:29698



# Unknown set no. 307, Gzrgtk gpvJ wo cp'Rcuo c'gzra5

NLSMPLLPADPHK(=PEP)\_5\_4\_0\_2, m/z:922.64(4+), RT:103.58, Y-score:94.48





# Unknown set no. 308, Gzrgtk gpv'J wo cp'Ræuo c'gzra5

SMTNR(=PEP)\_4\_3\_0\_1, m/z:1078.92(2+), RT:16.77, Y-score:88.77

HCD Scan:2930



CID Scan:2935



# Unknown set no. 309, Gzrgtko gpv'J wo cp'Rtuo c'gzra4

SMTNR(=PEP)\_5\_4\_0\_2, m/z:938.36(3+), RT:16.78, Y-score:94.31



# Unknown set no. 310, Gzrgtko gvwJ wo cp'Rcuo c'gzra5

SMTNR(=PEP)\_5\_4\_0\_2, m/z:938.36(3+), RT:16.93, Y-score:94.59

### HCD Scan:2993



### CID Scan:2996



# Unknown set no. 311, Gzrgtko gvw'J wo cp'Rcuo c'gzra4

SMTNR(=PEP)\_5\_4\_0\_2, m/z:938.36(3+), RT:16.93, Y-score:95.70



# Unknown set no. 312, Gzrgtko gvwJ wo cp'Rtuo c'gzra5

SMTNR(=PEP)\_5\_4\_0\_2, m/z:938.36(3+), RT:17.00, Y-score:90.47



# Unknown set no. 313, Gzrgtko gvwJ wo cp'Rncuo c'gzra4

DSVSVVLGQHFFNR(=PEP)\_5\_4\_0\_2, m/z:953.16(4+), RT:81.95, Y-score:74.30



# Unknown set no. 314, Gzrgtko gvwJ wo cp'Rcuo c'gzra4

GTANTTTAGVPCQR(=PEP)\_5\_4\_0\_2, m/z:910.37(4+), RT:50.06, Y-score:81.18

HCD Scan:12956



CID Scan:12959



Unknown set no. 315, Gzr gtlk gpvJ wo cp'Rcuo c'gzra5

GTANTTTAGVPCQR(=PEP)\_5\_4\_0\_2, m/z:910.37(4+), RT:50.32, Y-score:88.43





# Unknown set no. 316, Gzrgtko gpv<J wo cp'Rccuo c'gzra3

VIDFNCTTSSVSSALANTK(=PEP)\_5\_4\_0\_1, m/z:982.92(4+), RT:92.35, Y-score:99.39

HCD Scan:26934



CID Scan:26936



Unknown set no. 317, Gzrgtko gpwJ wo cp'Rucuo c'gzra4

VIDFNCTTSSVSSALANTK(=PEP)\_5\_4\_0\_1, m/z:982.92(4+), RT:92.39, Y-score:100.00



# Unknown set no. 318, Gzrgtko gpv<J wo cp'Rruo c'gzra5

VIDFNCTTSSVSSALANTK(=PEP)\_5\_4\_0\_1, m/z:982.92(4+), RT:92.50, Y-score:94.95

### MS/MS Scan:27035



### CID Scan:27037



# Unknown set no. 319, Gzrgtko gpv<J wo cp'Rucuo c'gzra6

VIDFNCTTSSVSSALANTK(=PEP)\_5\_4\_0\_1, m/z:982.92(4+), RT:92.35, Y-score:94.40

MS/MS Scan:27386



MS/MS Scan:27387



Unknown set no. 320, Gzrgtko gpv<J wo cp'Rncuo c'gzra5

VIDFNCTTSSVSSALANTK(=PEP)\_5\_4\_0\_1, m/z:982.92(4+), RT:92.13, Y-score:90.74

HCD Scan:26631



CID Scan:26632





# Unknown set no. 322, Gzrgtko gpv<J wo cp'Rruo c'gzra3

VIDFNCTTSSVSSALANTK(=PEP)\_5\_4\_0\_2, m/z:1055.69(4+), RT:101.20, Y-score:89.94

HCD Scan:28731



CID Scan:28732



# Unknown set no. 323, Gzrgtko gpv<J wo cp'Rrcuo c'gzra4

VIDFNCTTSSVSSALANTK(=PEP)\_5\_4\_0\_2, m/z:1055.69(4+), RT:101.39, Y-score:83.23





Unknown set no. 324, Gzrgtko gpv<J wo cp'Rrcuo c'gzra5

VIDFNCTTSSVSSALANTK(=PEP)\_5\_4\_0\_2, m/z:1055.69(4+), RT:101.46, Y-score:86.71

HCD Scan:28936



CID Scan:28937



# Unknown set no. 325, Gzrgtkb gpv<J wo cp'Rruw c'gzra6

VIDFNCTTSSVSSALANTK(=PEP)\_5\_4\_0\_2, m/z:1055.69(4+), RT:101.57, Y-score:90.46

HCD Scan:29241



CID Scan:29242



Unknown set no. 326, Gzrgtko gpvJ wo cp'Ræuo c'gzra5

VIDFNCTTSSVSSALANTK(=PEP)\_5\_4\_0\_2, m/z:1055.69(4+), RT:101.28, Y-score:88.11

HCD Scan:28372



CID Scan:28374



# Unknown set no. 327, Experiment: Human Plasma exp\_5

LFNVTPQDEQK(=PEP)\_5\_5\_1\_1, m/z:896.12(4+), RT:62.03, Y-score:81.96



Unknown set no. 328, Gzrgtko gpy<J wo cp'Rncuo c'gzra3

LFNVTPQDEQK(=PEP)\_5\_5\_1\_2, m/z:1291.53(3+), RT:70.82, Y-score:79.03



Unknown set no. 329, Gzrgtko gpv<J wo cp'Rtuo c'gzra6

LFNVTPQDEQK(=PEP)\_5\_5\_1\_2, m/z:968.90(4+), RT:71.16, Y-score:73.10



Unknown set no. 330, Gzrgtko gpv<J wo cp'Rruo c'gzra6

LFNVTPQDEQK(=PEP)\_5\_5\_1\_2, m/z:1291.53(3+), RT:71.03, Y-score:73.93

HCD Scan:21037



CID Scan:21041



# Unknown set no. 331, Gzrgtko gpv'J wo cp'Rncuo c'gzra3

TPLTANITK(=PEP)\_5\_4\_1\_1, m/z:1006.77(3+), RT:55.79, Y-score:94.08





# Unknown set no. 332, Gzr gtlk gpv'J wo cp'Rruo c'gzra4

TPLTANITK(=PEP)\_5\_4\_1\_1, m/z:1006.77(3+), RT:55.94, Y-score:92.85



Unknown set no. 333, Gzrgtko gpv<J wo cp'Rruo c'gzra5

TPLTANITK(=PEP)\_5\_4\_1\_1, m/z:1509.65(2+), RT:55.42, Y-score:91.90

HCD Scan:14873



CID Scan:14878



# Unknown set no. 334, Gzrgtko gpv<J wo cp'Rncuo c'gzra6

TPLTANITK(=PEP)\_5\_4\_1\_1, m/z:1509.65(2+), RT:55.57, Y-score:73.04

HCD Scan:15172



CID Scan:15175



Unknown set no. 335, Gzrgtko gpv<J wo cp'Rruo c'gzra5

TPLTANITK(=PEP)\_5\_4\_1\_2, m/z:1655.20(2+), RT:66.19, Y-score:89.16

HCD Scan:18893



CID Scan:18898



# Unknown set no. 336, Gzrgtko gvw'J wo cp'Rcuo c'gzra5

TPLTANITK(=PEP)\_5\_5\_1\_1, m/z:806.10(4+), RT:55.74, Y-score:92.17



Unknown set no. 337, Gzrgtko gpvJ wo cp'Rucuo c'gzra5

TPLTANITK(=PEP)\_5\_5\_1\_1, m/z:1611.69(2+), RT:55.71, Y-score:97.31



Unknown set no. 338, Gzrgtko gpv<J wo cp'Rruo c'gzra6

TPLTANITK(=PEP)\_5\_5\_1\_1, m/z:806.10(4+), RT:55.94, Y-score:91.10



Unknown set no. 339, Gzrgtkb gpv<J wo cp'Rruo c'gzra6

TPLTANITK(=PEP)\_5\_5\_1\_1, m/z:1611.19(2+), RT:55.92, Y-score:100.00

HCD Scan:15311



CID Scan:15315





Unknown set no. 340, Gzrgtko gpv<J wo cp'Ræuo c'gzra5

TPLTANITK(=PEP)\_5\_5\_1\_2, m/z:878.87(4+), RT:66.41, Y-score:86.13

HCD Scan:18978



CID Scan:18979



# Unknown set no. 341, Gzrgtko gpv'J wo cp'Rncuo c'gzra3

EEQYNSTYR(=PEP)\_3\_3\_0\_0, m/z:1142.96(2+), RT:25.20, Y-score:89.37



# Unknown set no. 342, Gzrgtko gpv<J wo cp'Rncuo c'gzra4

EEQYNSTYR(=PEP)\_3\_3\_0\_0, m/z:1142.96(2+), RT:25.99, Y-score:94.30

CID Scan:5981



CID Scan:5984



Unknown set no. 343, Gzrgtko gpvJ wo cp'Rcuo c'gzra5

EEQYNSTYR(=PEP)\_3\_3\_0\_0, m/z:1142.96(2+), RT:26.17, Y-score:91.28

HCD Scan:5941



CID Scan:5945



# Unknown set no. 344, Gzrgtko gpx'J wo cp'Rcuo c'gzra6

EEQYNSTYR(=PEP)\_3\_3\_0\_0, m/z:1142.96(2+), RT:25.61, Y-score:84.92



# Unknown set no. 345, Gzrgtko gpvJ wo cp'Rtuo c'gzra5

EEQYNSTYR(=PEP)\_3\_3\_0\_0, m/z:1142.96(2+), RT:26.15, Y-score:89.38



# Unknown set no. 346, Gzrgtk gpv<J wo cp'Rrcuo c'gzra3

EEQYNSTYR(=PEP)\_3\_3\_1\_0, m/z:1215.99(2+), RT:23.08, Y-score:100.00

HCD Scan:4902



CID Scan:4903



# Unknown set no. 347, Gzrgtko gpv<J wo cp'Rncuo c'gzra4

EEQYNSTYR(=PEP)\_3\_3\_1\_0, m/z:1215.99(2+), RT:24.60, Y-score:98.90

HCD Scan:5412



CID Scan:5416





# Unknown set no. 348, Gzrgtko gpy<J wo cp'Ræuo c'gzra5

EEQYNSTYR(=PEP)\_3\_3\_1\_0, m/z:1215.99(2+), RT:24.47, Y-score:97.50



# Unknown set no. 349, Gzrgtko gvw'J wo cp'Rtuo c'gzra6

EEQYNSTYR(=PEP)\_3\_3\_1\_0, m/z:1215.99(2+), RT:25.91, Y-score:91.05

HCD Scan:5927



CID Scan:5932



Unknown set no. 350, Gzr gtlb gpvJ wo cp'Rxcu c'gzra3

EEQYNSTYR(=PEP)\_3\_4\_0\_0, m/z:1244.50(2+), RT:25.57, Y-score:93.53

HCD Scan:5789



CID Scan:5791



# Unknown set no. 351, Gzrgtko gpv<J wo cp'Rrcuo c'gzra4

EEQYNSTYR(=PEP)\_3\_4\_0\_0, m/z:1244.50(2+), RT:25.95, Y-score:90.62

HCD Scan:5962



CID Scan:5966



# Unknown set no. 352, Gzrgtko gpvJ wo cp'Rcuo c'gzra6

EEQYNSTYR(=PEP)\_3\_4\_0\_0, m/z:1244.50(2+), RT:25.52, Y-score:86.77

HCD Scan:5761



CID Scan:5765



Unknown set no. 353, Gzrgtko gpvJ wo cp'Rtuo c'gzra3

EEQYNSTYR(=PEP)\_3\_4\_1\_0, m/z:1317.53(2+), RT:25.33, Y-score:89.31

HCD Scan:5703



CID Scan:5706



# Unknown set no. 354, Gzrgtko gpy'J wo cp'Rncuo c'gzra4

EEQYNSTYR(=PEP)\_3\_4\_1\_0, m/z:1317.53(2+), RT:25.02, Y-score:89.46

HCD Scan:5592



CID Scan:5595



# Unknown set no. 355, Gzrgtko gpvJ wo cp'Rtuo c'gzra5

EEQYNSTYR(=PEP)\_3\_4\_1\_0, m/z:1317.53(2+), RT:26.01, Y-score:89.39

HCD Scan:5877



CID Scan:5880





# Unknown set no. 356, Gzrgtko gpv<J wo cp'Rcuo c'gzra6

EEQYNSTYR(=PEP)\_3\_4\_1\_0, m/z:1317.53(2+), RT:26.89, Y-score:95.95

HCD Scan:6190



CID Scan:6195



# Unknown set no. 357, Gzrgtko gpvJ wo cp'Rtuo c'gzra5

EEQYNSTYR(=PEP)\_3\_4\_1\_0, m/z:1317.53(2+), RT:25.84, Y-score:89.51

HCD Scan:5780



CID Scan:5784



# Unknown set no. 358, Gzrgtko gpv'J wo cp'Rncuo c'gzra3

EEQYNSTYR(=PEP)\_4\_3\_0\_0, m/z:1223.99(2+), RT:25.03, Y-score:91.32



# Unknown set no. 359, Gzrgtko gpv<J wo cp'Rncuo c'gzra4

EEQYNSTYR(=PEP)\_4\_3\_0\_0, m/z:1223.99(2+), RT:25.27, Y-score:87.84



# Unknown set no. 360, Gzrgtko gpywJ wo cp'Rncuo c'gzra5

EEQYNSTYR(=PEP)\_4\_3\_0\_0, m/z:1223.99(2+), RT:25.44, Y-score:87.40



Unknown set no. 361, Gzrgtko gpvJ wo cp'Rcuo c'gzra6

EEQYNSTYR(=PEP)\_4\_3\_0\_0, m/z:1223.99(2+), RT:25.54, Y-score:90.11



# Unknown set no. 362, Gzrgtko gpvJ wo cp'Rtuo c'gzra5

EEQYNSTYR(=PEP)\_4\_3\_0\_0, m/z:1223.99(2+), RT:25.42, Y-score:91.81



# Unknown set no. 363, Gzrgtko gpv<J wo cp'Rrcuo c'gzra3

EEQYNSTYR(=PEP)\_4\_3\_1\_0, m/z:1297.02(2+), RT:25.29, Y-score:90.10





# Unknown set no. 364, Gzrgtko gvwJ wo cp'Rcuo c'gzra4

EEQYNSTYR(=PEP)\_4\_3\_1\_0, m/z:1297.02(2+), RT:26.01, Y-score:97.09



Unknown set no. 365, Gzrgtko gpv<J wo cp'Rncuo c'gzra5

EEQYNSTYR(=PEP)\_4\_3\_1\_0, m/z:1297.02(2+), RT:26.24, Y-score:92.37

HCD Scan:5969



CID Scan:5972



# Unknown set no. 366, Gzrgtko gpvJ wo cp'Rrcuo c'gzra5

EEQYNSTYR(=PEP)\_4\_3\_1\_0, m/z:1297.02(2+), RT:25.75, Y-score:90.67



# Unknown set no. 367, Gzrgtk gpv<J wo cp'Rruo c'gzra3

EEQYNSTYR(=PEP)\_4\_3\_1\_1, m/z:1442.56(2+), RT:37.83, Y-score:96.24

HCD Scan:9063



CID Scan:9068



# Unknown set no. 368, Gzrgtko gpv'J wo cp'Rucuo c'gzra4

EEQYNSTYR(=PEP)\_4\_3\_1\_1, m/z:1442.56(2+), RT:38.01, Y-score:93.92

HCD Scan:9212



CID Scan:9215



# Unknown set no. 369, Gzrgtko gpv<J wo cp'Rncuo c'gzra5

EEQYNSTYR(=PEP)\_4\_3\_1\_1, m/z:962.04(3+), RT:38.39, Y-score:86.30

### HCD Scan:9225



### CID Scan:9230



# Unknown set no. 370, Gzrgtko gpv<J wo cp'Rncuo c'gzra5

EEQYNSTYR(=PEP)\_4\_3\_1\_1, m/z:1442.56(2+), RT:37.74, Y-score:88.12



# Unknown set no. 371, Gzrgtko gpwJ wo cp'Rtuo c'gzra6

EEQYNSTYR(=PEP)\_4\_3\_1\_1, m/z:1442.56(2+), RT:38.35, Y-score:89.75





# Unknown set no. 372, Gzrgtko gpvJ wo cp'Rcuo c'gzra5

EEQYNSTYR(=PEP)\_4\_3\_1\_1, m/z:962.04(3+), RT:38.54, Y-score:95.87

HCD Scan:9228



CID Scan:9233



Unknown set no. 373, Gzrgtko gpvJ wo cp'Rncuo c'gzra5

EEQYNSTYR(=PEP)\_4\_3\_1\_1, m/z:1443.06(2+), RT:38.41, Y-score:90.65



Unknown set no. 374, Gzrgtko gpv<J wo cp'Ræuo c'gzra5

EEQYNSTYR(=PEP)\_4\_4\_0\_0, m/z:1325.53(2+), RT:24.97, Y-score:88.64



Unknown set no. 375, Gzrgtko gpvJ wo cp'Rcuo c'gza5

EEQYNSTYR(=PEP)\_4\_4\_0\_0, m/z:1325.52(2+), RT:24.96, Y-score:86.43

HCD Scan:5415



CID Scan:5420



# Unknown set no. 376, Gzrgtko gpv<J wo cp'Rruo c'gzra3

EEQYNSTYR(=PEP)\_4\_4\_1\_0, m/z:932.71(3+), RT:25.10, Y-score:98.69



# Unknown set no. 377, Gzrgtko gpv<J wo cp'Rtuo c'gzra3

EEQYNSTYR(=PEP)\_4\_4\_1\_0, m/z:1398.56(2+), RT:22.92, Y-score:97.94

HCD Scan:4871



CID Scan:4872



# Unknown set no. 378, Gzrgtko gpv<J wo cp'Rcuo c'gzra4

EEQYNSTYR(=PEP)\_4\_4\_1\_0, m/z:1398.56(2+), RT:26.37, Y-score:95.35

HCD Scan:6126



CID Scan:6129



Unknown set no. 379, Gzrgtko gpv<J wo cp'Rncuo c'gzra5

EEQYNSTYR(=PEP)\_4\_4\_1\_0, m/z:932.71(3+), RT:26.06, Y-score:98.69





Unknown set no. 380, Gzrgtko gpv<J wo cp'Rncuo c'gzra5

EEQYNSTYR(=PEP)\_4\_4\_1\_0, m/z:1398.56(2+), RT:23.42, Y-score:94.26

CID Scan:4944



CID Scan:4946



Unknown set no. 381, Gzrgtko gpvJ wo cp'Rcuo c'gzra6

EEQYNSTYR(=PEP)\_4\_4\_1\_0, m/z:1398.56(2+), RT:26.93, Y-score:100.00

HCD Scan:6205



CID Scan:6207



# Unknown set no. 382, Gzrgtko gpvJ wo cp'Rcuo c'gzra5

EEQYNSTYR(=PEP)\_4\_4\_1\_0, m/z:932.71(3+), RT:25.66, Y-score:98.66



# Unknown set no. 383, Gzr gtlb gpv'J wo cp'Rncuo c'gzra3

EEQYNSTYR(=PEP)\_4\_4\_1\_1, m/z:1029.74(3+), RT:38.10, Y-score:93.88

HCD Scan:9176



CID Scan:9178



# Unknown set no. 384, Gzrgtko gpv'J wo cp'Rucuo c'gzra3

EEQYNSTYR(=PEP)\_4\_4\_1\_1, m/z:1544.10(2+), RT:38.30, Y-score:88.91

HCD Scan:9249



CID Scan:9252



# Unknown set no. 385, Gzrgtko gpv<J wo cp'Rncuo c'gzra4

EEQYNSTYR(=PEP)\_4\_4\_1\_1, m/z:1029.74(3+), RT:38.37, Y-score:93.98

HCD Scan:9366



CID Scan:9369



Unknown set no. 386, Gzrgtko gpvJ wo cp'Rcuo c'gzra5

EEQYNSTYR(=PEP)\_4\_4\_1\_1, m/z:1029.74(3+), RT:38.65, Y-score:93.73

HCD Scan:9339



CID Scan:9342



# Unknown set no. 387, Gzrgtko gvwJ wo cp'Rcuo c'gzra5

EEQYNSTYR(=PEP)\_4\_4\_1\_1, m/z:1544.10(2+), RT:38.82, Y-score:90.32

HCD Scan:9409



CID Scan:9412





Unknown set no. 388, Gzrgtko gpvJ wo cp'Rcuo c'gzra6

EEQYNSTYR(=PEP)\_4\_4\_1\_1, m/z:1544.10(2+), RT:38.31, Y-score:87.72

HCD Scan:9259



CID Scan:9262



Unknown set no. 389, Gzrgtko gpv<J wo cp'Rcuo c'gzra5

EEQYNSTYR(=PEP)\_4\_4\_1\_1, m/z:1544.10(2+), RT:38.92, Y-score:79.66

HCD Scan:9376



CID Scan:9379



# Unknown set no. 390, Gzrgtko gpvJ wo cp'Rtuo c'gzra4

EEQYNSTYR(=PEP)\_4\_5\_1\_0, m/z:1500.10(2+), RT:26.92, Y-score:96.26



# Unknown set no. 391, Gzrgtko gpvJ wo cp'Rxcuo c'gzra6

EEQYNSTYR(=PEP)\_4\_5\_1\_0, m/z:1500.10(2+), RT:28.10, Y-score:85.62



Unknown set no. 392, Gzrgtko gpvJ wo cp'Rcuo c'gzra5

EEQYNSTYR(=PEP)\_4\_5\_1\_0, m/z:1500.10(2+), RT:27.27, Y-score:96.46



# Unknown set no. 393, Gzrgtk gpv<J wo cp'Ræuo c'gzra3

EEQYNSTYR(=PEP)\_5\_3\_1\_1, m/z:1016.06(3+), RT:37.14, Y-score:89.84

HCD Scan:8775



CID Scan:8778



Unknown set no. 394, Gzrgtko gpvJ wo cp'Rcuo c'gzra4

EEQYNSTYR(=PEP)\_5\_3\_1\_1, m/z:1016.06(3+), RT:37.35, Y-score:79.70

HCD Scan:8931



CID Scan:8934



Unknown set no. 395, Gzrgtko gpvJ wo cp'Rcuo c'gzra5

EEQYNSTYR(=PEP)\_5\_3\_1\_1, m/z:1016.06(3+), RT:37.77, Y-score:87.24

HCD Scan:8953



CID Scan:8958





# Unknown set no. 396, Gzrgtko gpv<J wo cp'Rruo c'gzra4

EEQYNSTYR(=PEP)\_5\_4\_0\_0, m/z:1406.55(2+), RT:24.69, Y-score:83.01

HCD Scan:5450



CID Scan:5454



# Unknown set no. 397, Gzrgtko gpv'J wo cp'Rruo c'gzra3

EEQYNSTYR(=PEP)\_5\_4\_0\_1, m/z:1552.10(2+), RT:38.28, Y-score:96.06

HCD Scan:9242



CID Scan:9244



# Unknown set no. 398, Gzrgtko gpv<J wo cp'Rrcuo c'gzra5

EEQYNSTYR(=PEP)\_5\_4\_0\_1, m/z:1552.10(2+), RT:38.32, Y-score:82.19

HCD Scan:9195



CID Scan:9198



# Unknown set no. 399, Gzrgtko gpv<J wo cp'Rrcuo c'gzra3

EEQYNSTYR(=PEP)\_5\_4\_1\_0, m/z:1479.58(2+), RT:25.61, Y-score:100.00

HCD Scan:5806



CID Scan:5809



Unknown set no. 400, Gzr gtlb gpv<J wo cp'Rncuo c'gzra4

EEQYNSTYR(=PEP)\_5\_4\_1\_0, m/z:1479.58(2+), RT:25.41, Y-score:84.75



Unknown set no. 401, Gzrgtko gwvJ wo cp'Rtuo c'gzra6

EEQYNSTYR(=PEP)\_5\_4\_1\_0, m/z:1479.58(2+), RT:25.56, Y-score:90.39



Unknown set no. 402, Gzrgtko gpv<J wo cp'Rrcuo c'gzra3

EEQYNSTYR(=PEP)\_5\_4\_1\_1, m/z:1625.63(2+), RT:37.19, Y-score:95.02



# Unknown set no. 403, Gzrgtko gpy<J wo cp'Rruo c'gzra4

EEQYNSTYR(=PEP)\_5\_4\_1\_1, m/z:1625.13(2+), RT:38.27, Y-score:98.29

HCD Scan:9323



CID Scan:9326





Unknown set no. 404, Gzrgtko gpvJ wo cp'Rrcuo c'gzra5

EEQYNSTYR(=PEP)\_5\_4\_1\_1, m/z:813.07(4+), RT:38.23, Y-score:89.06



Unknown set no. 405, Gzrgtko gpv<J wo cp'Rrcuo c'gzra5

EEQYNSTYR(=PEP)\_5\_4\_1\_1, m/z:1625.63(2+), RT:38.45, Y-score:89.49



Unknown set no. 406, Gzrgtko gpvJ wo cp'Rtuo c'gzra6

EEQYNSTYR(=PEP)\_5\_4\_1\_1, m/z:813.07(4+), RT:38.34, Y-score:71.36



# Unknown set no. 407, Gzrgtko gpv<J wo cp'Rruo c'gzra6

EEQYNSTYR(=PEP)\_5\_4\_1\_1, m/z:1083.76(3+), RT:37.28, Y-score:94.56

HCD Scan:8886



CID Scan:8887



# Unknown set no. 408, Gzrgtko gpv<J wo cp'Rncuo c'gzra6

EEQYNSTYR(=PEP)\_5\_4\_1\_1, m/z:1625.13(2+), RT:38.62, Y-score:95.81



Unknown set no. 409, Gzrgtko gpwJ wo cp'Rcuo c'gzra5

EEQYNSTYR(=PEP)\_5\_4\_1\_1, m/z:1625.13(2+), RT:38.69, Y-score:92.43



# Unknown set no. 410, Gzrgtko gpvJ wo cp'Rcuo c'gzra3

EEQYNSTYR(=PEP)\_5\_4\_1\_2, m/z:1180.78(3+), RT:49.52, Y-score:86.11

HCD Scan:12577



CID Scan:12580



# Unknown set no. 411, Gzrgtko gpv<J wo cp'Rxcuo c'gzra4

EEQYNSTYR(=PEP)\_5\_4\_1\_2, m/z:1180.79(3+), RT:50.93, Y-score:85.72





# Unknown set no. 412, Gzrgtko gvwJ wo cp'Rcuo c'gzra3

EEQYNSTYR(=PEP)\_5\_4\_2\_0, m/z:1035.41(3+), RT:23.81, Y-score:92.52



# Unknown set no. 413, Gzrgtko gvwJ wo cp'Rxcuo c'gzra5

EEQYNSTYR(=PEP)\_5\_4\_2\_0, m/z:1035.41(3+), RT:24.28, Y-score:96.23



# Unknown set no. 414, Gzrgtko gpvJ wo cp'Rcuo c'gzra4

EEQYNSTYR(=PEP)\_5\_4\_2\_1, m/z:1132.44(3+), RT:36.40, Y-score:87.61

HCD Scan:8732



CID Scan:8733



# Unknown set no. 415, Gzrgtko gpv<J wo cp'Ræuo c'gzra5

EEQYNSTYR(=PEP)\_5\_4\_2\_1, m/z:1132.44(3+), RT:36.79, Y-score:88.48



Unknown set no. 416, Gzrgtko gpvJ wo cp'Rcuo c'gzra5

EEQYNSTYR(=PEP)\_5\_4\_2\_1, m/z:1132.44(3+), RT:36.80, Y-score:93.08

HCD Scan:8690



CID Scan:8692



# Unknown set no. 417, Gzrgtko gpv<J wo cp'Rucuo c'gzra6

EEQYNSTYR(=PEP)\_5\_5\_1\_0, m/z:1581.13(2+), RT:27.63, Y-score:82.53

### HCD Scan:6473



### CID Scan:6478



# Unknown set no. 418, Gzrgtko gpv<J wo cp'Rrcuo c'gzra6

EEQYNSTYR(=PEP)\_5\_5\_1\_2, m/z:1248.48(3+), RT:50.64, Y-score:75.76

HCD Scan:13162



CID Scan:13165



# Unknown set no. 419, Gzrgtko gpy'J wo cp'Rncuo c'gzra3

EEQFNSTFR(=PEP)\_3\_3\_0\_0, m/z:1126.97(2+), RT:52.00, Y-score:89.62

### HCD Scan:13533



### CID Scan:13538





# Unknown set no. 420, Gzrgtko gpv<J wo cp'Rncuo c'gzra4

EEQFNSTFR(=PEP)\_3\_3\_0\_0, m/z:1126.97(2+), RT:52.04, Y-score:88.37



Unknown set no. 421, Gzrgtko gpvJ wo cp'Rncuo c'gzra5

EEQFNSTFR(=PEP)\_3\_3\_0\_0, m/z:1126.96(2+), RT:51.78, Y-score:97.25



# Unknown set no. 422, Gzrgtko gpw'J wo cp'Ræuo c'gzra3

EEQFNSTFR(=PEP)\_3\_3\_1\_0, m/z:1199.99(2+), RT:51.22, Y-score:90.31



Unknown set no. 423, Gzrgtko gw'J wo cp'Rcuo c'gzra4

EEQFNSTFR(=PEP)\_3\_3\_1\_0, m/z:1199.99(2+), RT:51.24, Y-score:90.51



Unknown set no. 424, Gzrgtko gpvJ wo cp'Rcuo c'gzra5

EEQFNSTFR(=PEP)\_3\_3\_1\_0, m/z:1199.99(2+), RT:51.47, Y-score:93.11



# Unknown set no. 425, Gzrgtko gpv<J wo cp'Rrcuo c'gzra6

EEQFNSTFR(=PEP)\_3\_3\_1\_0, m/z:1199.99(2+), RT:51.34, Y-score:94.40



Unknown set no. 426, Gzrgtko gpv<J wo cp'Rrcuo c'gzra5

EEQFNSTFR(=PEP)\_3\_3\_1\_0, m/z:1199.99(2+), RT:51.41, Y-score:94.66



# Unknown set no. 427, Gzrgtko gpvJ wo cp'Rucuo c'gzra3

EEQFNSTFR(=PEP)\_3\_4\_0\_0, m/z:1228.51(2+), RT:52.13, Y-score:89.97

HCD Scan:13589



CID Scan:13593





# Unknown set no. 428, Gzrgtko gvwJ wo cp'Rucuo c'gzra6

EEQFNSTFR(=PEP)\_3\_4\_0\_0, m/z:1228.51(2+), RT:52.28, Y-score:85.24

HCD Scan:13852



CID Scan:13856



# Unknown set no. 429, Gzrgtko gpv'J wo cp'Ræu c'gzra3

EEQFNSTFR(=PEP)\_3\_4\_1\_0, m/z:1301.53(2+), RT:52.34, Y-score:89.42

HCD Scan:13680



CID Scan:13683





# Unknown set no. 431, Gzr gtlb gpv'J wo cp'Rncuo c'gzra5

EEQFNSTFR(=PEP)\_3\_4\_1\_0, m/z:1301.53(2+), RT:52.62, Y-score:89.47

HCD Scan:13830



CID Scan:13833



# Unknown set no. 432, Gzrgtko gpv'J wo cp'Rucuo c'gzra6

EEQFNSTFR(=PEP)\_3\_4\_1\_0, m/z:1301.53(2+), RT:52.52, Y-score:89.40

HCD Scan:13954



CID Scan:13958



# Unknown set no. 433, Gzrgtko gpv'J wo cp'Rncuo c'gzra5

EEQFNSTFR(=PEP)\_3\_4\_1\_0, m/z:1301.53(2+), RT:52.59, Y-score:89.82

HCD Scan:13746



CID Scan:13749



Unknown set no. 434, Gzrgtko gpy'J wo cp'Rncuo c'gzra3

EEQFNSTFR(=PEP)\_4\_3\_1\_0, m/z:1281.02(2+), RT:51.64, Y-score:89.44



# Unknown set no. 435, Gzrgtko gpy<J wo cp'Rruo c'gzra4

EEQFNSTFR(=PEP)\_4\_3\_1\_0, m/z:1281.02(2+), RT:51.62, Y-score:88.68





# Unknown set no. 436, Gzr gtlk gpvJ wo cp'Ræuo c'gza5

EEQFNSTFR(=PEP)\_4\_3\_1\_0, m/z:1281.02(2+), RT:51.90, Y-score:89.19



Unknown set no. 437, Gzrgtko gpv'J wo cp'Rcuo c'gzra6

EEQFNSTFR(=PEP)\_4\_3\_1\_0, m/z:1281.02(2+), RT:51.34, Y-score:89.29

CID Scan:13465



CID Scan:13469



# Unknown set no. 438, Gzrgtk gpv<J wo cp'Rruo c'gzra5

EEQFNSTFR(=PEP)\_4\_3\_1\_0, m/z:854.35(3+), RT:52.32, Y-score:92.26

FCD Scan:13633



CID Scan:13638



# Unknown set no. 439, Gzrgtko gpv<J wo cp'Rcuo c'gzra5

EEQFNSTFR(=PEP)\_4\_3\_1\_0, m/z:1281.02(2+), RT:51.89, Y-score:89.72



Unknown set no. 440, Gzrgtko gpvJ wo cp'Rncuo c'gzra3

EEQFNSTFR(=PEP)\_4\_3\_1\_1, m/z:951.38(3+), RT:61.54, Y-score:92.24

HCD Scan:17145



CID Scan:17150



Unknown set no. 441, Gzrgtko gpv<J wo cp'Rruo c'gzra3

EEQFNSTFR(=PEP)\_4\_3\_1\_1, m/z:1426.56(2+), RT:60.65, Y-score:92.01

HCD Scan:16766



CID Scan:16769



# Unknown set no. 442, Gzr gtlb gpc'J wo cp'Rruo c'gzra4

EEQFNSTFR(=PEP)\_4\_3\_1\_1, m/z:951.38(3+), RT:61.68, Y-score:95.50



Unknown set no. 443, Gzrgtko gpvJ wo cp'Rxcuo c'gzra5

EEQFNSTFR(=PEP)\_4\_3\_1\_1, m/z:951.38(3+), RT:61.64, Y-score:89.35





# Unknown set no. 444, Gzrgtko gpv<J wo cp'Rrcuo c'gzra5

EEQFNSTFR(=PEP)\_4\_3\_1\_1, m/z:1426.57(2+), RT:61.49, Y-score:89.76

HCD Scan:17083



CID Scan:17088



# Unknown set no. 445, Gzrgtko gpy<J wo cp'Rncuo c'gzra6

EEQFNSTFR(=PEP)\_4\_3\_1\_1, m/z:951.38(3+), RT:61.79, Y-score:93.93



Unknown set no. 446, Gzrgtko gpv<J wo cp'Rncuo c'gzra5

EEQFNSTFR(=PEP)\_4\_3\_1\_1, m/z:951.38(3+), RT:61.62, Y-score:92.65



Unknown set no. 447, Gzrgtko gpv'J wo cp'Rncuo c'gzra5

EEQFNSTFR(=PEP)\_4\_3\_1\_1, m/z:1426.57(2+), RT:60.73, Y-score:84.06



# Unknown set no. 448, Gzrgtko gpv'J wo cp'Rcuo c'gzra3

EEQFNSTFR(=PEP)\_4\_4\_1\_0, m/z:922.04(3+), RT:52.35, Y-score:98.51



Unknown set no. 449, Gzrgtko gpy<J wo cp'Rrcuo c'gzra3

EEQFNSTFR(=PEP)\_4\_4\_1\_0, m/z:1382.56(2+), RT:49.76, Y-score:91.00



# Unknown set no. 450, Gzrgtk gpv<J wo cp'Rcuo c'gzra4

EEQFNSTFR(=PEP)\_4\_4\_1\_0, m/z:922.04(3+), RT:52.33, Y-score:98.15



# Unknown set no. 451, Gzrgtko gvw'J wo cp'Rrcuo c'gzra4

EEQFNSTFR(=PEP)\_4\_4\_1\_0, m/z:1382.56(2+), RT:49.82, Y-score:96.30





# Unknown set no. 452, Gzr gtlk gpv J wo cp'Rrcuo c'gzra5

EEQFNSTFR(=PEP)\_4\_4\_1\_0, m/z:1382.56(2+), RT:52.32, Y-score:89.19



Unknown set no. 453, Gzr gtko gpv J wo cp'Rcuo c'gzra6

EEQFNSTFR(=PEP)\_4\_4\_1\_0, m/z:922.04(3+), RT:51.98, Y-score:98.55



# Unknown set no. 454, Gzrgtko gpvJ wo cp'Rcuo c'gzra6

EEQFNSTFR(=PEP)\_4\_4\_1\_0, m/z:1382.56(2+), RT:51.42, Y-score:91.44



# Unknown set no. 455, Gzrgtko gpv'J wo cp'Rtuo c'gzra5

EEQFNSTFR(=PEP)\_4\_4\_1\_0, m/z:922.04(3+), RT:52.07, Y-score:98.63



# Unknown set no. 456, Gzrgtko gpv'J wo cp'Rtuo c'gzra5

EEQFNSTFR(=PEP)\_4\_4\_1\_0, m/z:1382.56(2+), RT:50.05, Y-score:97.00



Unknown set no. 457, Gzrgtko gpv<J wo cp'Rruo c'gzra3

EEQFNSTFR(=PEP)\_4\_4\_1\_1, m/z:1528.11(2+), RT:61.10, Y-score:97.81



# Unknown set no. 458, Gzrgtko gpv'J wo cp'Rrcuo c'gzra4

EEQFNSTFR(=PEP)\_4\_4\_1\_1, m/z:1019.08(3+), RT:61.80, Y-score:93.63

HCD Scan:17545



CID Scan:17547



Unknown set no. 459, Gzrgtko gpv<J wo cp'Rrcuo c'gzra4

EEQFNSTFR(=PEP)\_4\_4\_1\_1, m/z:1528.11(2+), RT:61.24, Y-score:94.49

HCD Scan:17305



CID Scan:17308





# Unknown set no. 460, Gzrgtko gpvJ wo cp'Rrcuo c'gzra5

EEQFNSTFR(=PEP)\_4\_4\_1\_1, m/z:1019.08(3+), RT:61.22, Y-score:93.38

### HCD Scan:16964



### CID Scan:16967



Unknown set no. 461, Gzrgtko gpv<J wo cp'Rncuo c'gzra5

EEQFNSTFR(=PEP)\_4\_4\_1\_1, m/z:1528.11(2+), RT:61.17, Y-score:95.20

HCD Scan:16943



CID Scan:16948



# Unknown set no. 462, Gzrgtko gwvJ wo cp'Rcuo c'gzra6

EEQFNSTFR(=PEP)\_4\_4\_1\_1, m/z:1019.08(3+), RT:61.90, Y-score:93.94

HCD Scan:17598



CID Scan:17600



# Unknown set no. 463, Gzrgtko gpv<J wo cp'Ræuo c'gzra6

EEQFNSTFR(=PEP)\_4\_4\_1\_1, m/z:1528.11(2+), RT:61.34, Y-score:95.96

HCD Scan:17364



CID Scan:17369



# Unknown set no. 464, Gzrgtko gpw'J wo cp'Rcuo c'gzra5

EEQFNSTFR(=PEP)\_4\_4\_1\_1, m/z:1019.08(3+), RT:61.71, Y-score:93.77

HCD Scan:17235



CID Scan:17237



Unknown set no. 465, Gzrgtko gpv'J wo cp'Rcuo c'gzra5

EEQFNSTFR(=PEP)\_4\_4\_1\_1, m/z:1528.11(2+), RT:61.16, Y-score:92.83



Unknown set no. 466, Gzrgtko gpv<J wo cp'Rncuo c'gzra3

EEQFNSTFR(=PEP)\_4\_5\_1\_0, m/z:1484.10(2+), RT:51.99, Y-score:90.26



# Unknown set no. 467, Gzrgtko gpv<J wo cp'Rccuo c'gzra4

EEQFNSTFR(=PEP)\_4\_5\_1\_0, m/z:1484.10(2+), RT:52.04, Y-score:91.95

HCD Scan:13782



CID Scan:13785





Unknown set no. 468, Gzrgtko gpv<J wo cp'Rncuo c'gzra5

EEQFNSTFR(=PEP)\_4\_5\_1\_0, m/z:1484.10(2+), RT:52.84, Y-score:97.51

HCD Scan:13923



CID Scan:13927



# Unknown set no. 469, Gzrgtko gpvJ wo cp'Rcuo c'gzra6

EEQFNSTFR(=PEP)\_4\_5\_1\_0, m/z:1484.10(2+), RT:52.19, Y-score:88.03



# Unknown set no. 470, Gzrgtko gpvJ wo cp'Rrcuo c'gzra4

EEQFNSTFR(=PEP)\_5\_3\_1\_1, m/z:1005.40(3+), RT:61.12, Y-score:93.63

HCD Scan:17256



CID Scan:17259



# Unknown set no. 471, Gzrgtko gpv'J wo cp'Rruo c'gzra3

EEQFNSTFR(=PEP)\_5\_4\_1\_0, m/z:1463.59(2+), RT:51.50, Y-score:86.66



Unknown set no. 472, Gzrgtko gpv<J wo cp'Rrcuo c'gzra5

EEQFNSTFR(=PEP)\_5\_4\_1\_0, m/z:1463.59(2+), RT:60.72, Y-score:96.33



Unknown set no. 473, Gzrgtko gvwJ wo cp'Rcuo c'gzra6

EEQFNSTFR(=PEP)\_5\_4\_1\_0, m/z:1463.59(2+), RT:51.71, Y-score:89.95



# Unknown set no. 474, Gzrgtko gpv'J wo cp'Rncuo c'gzra3

EEQFNSTFR(=PEP)\_5\_4\_1\_1, m/z:805.07(4+), RT:60.68, Y-score:89.13



# Unknown set no. 475, Gzrgtko gpv<J wo cp'Rncuo c'gzra3

EEQFNSTFR(=PEP)\_5\_4\_1\_1, m/z:1609.13(2+), RT:60.48, Y-score:94.05

CID Scan:16694



CID Scan:16698





# Unknown set no. 476, Gzrgtko gvwJ wo cp'Rtuo c'gzra4

EEQFNSTFR(=PEP)\_5\_4\_1\_1, m/z:805.07(4+), RT:60.72, Y-score:89.40



Unknown set no. 477, Gzrgtko gpv<J wo cp'Rncuo c'gzra4

EEQFNSTFR(=PEP)\_5\_4\_1\_1, m/z:1609.13(2+), RT:61.11, Y-score:98.33

HCD Scan:17251



CID Scan:17254



Unknown set no. 478, Gzrgtko gpv'J wo cp'Rucuo c'gzra5

EEQFNSTFR(=PEP)\_5\_4\_1\_1, m/z:805.07(4+), RT:60.66, Y-score:93.09



# Unknown set no. 479, Gzrgtko gpv<J wo cp'Rrcuo c'gzra5

EEQFNSTFR(=PEP)\_5\_4\_1\_1, m/z:1609.13(2+), RT:60.54, Y-score:94.30

HCD Scan:16681



CID Scan:16686



Unknown set no. 480, Gzrgtko gpv<J wo cp'Rtuo c'gzra6

EEQFNSTFR(=PEP)\_5\_4\_1\_1, m/z:1609.13(2+), RT:61.21, Y-score:99.12



Unknown set no. 481, Gzrgtko gpv'J wo cp'Rucuo c'gzra5

EEQFNSTFR(=PEP)\_5\_4\_1\_1, m/z:805.07(4+), RT:60.61, Y-score:90.44



# Unknown set no. 482, Gzrgtk gpv<J wo cp'Rruo c'gzra5

EEQFNSTFR(=PEP)\_5\_4\_1\_1, m/z:1609.13(2+), RT:60.52, Y-score:96.54

HCD Scan:16725



CID Scan:16729



Unknown set no. 483, Gzrgtko gvwJ wo cp'Rcuo c'gzra5

EEQFNSTFR(=PEP)\_5\_4\_1\_2, m/z:1170.12(3+), RT:71.24, Y-score:88.40





Unknown set no. 484, Gzrgtko gpvJ wo cp'Rxcuo c'gzra6

EEQFNSTFR(=PEP)\_5\_4\_2\_1, m/z:1121.78(3+), RT:60.22, Y-score:85.36



Unknown set no. 485, Gzrgtko gpv<J wo cp'Rtuo c'gzra5

EEQFNSTFR(=PEP)\_5\_4\_2\_1, m/z:1121.78(3+), RT:60.10, Y-score:86.75



# Unknown set no. 486, Gzrgtko gvw<J wo cp'Rrcuo c'gzra5

EEQFNSTFR(=PEP)\_5\_5\_1\_0, m/z:1565.62(2+), RT:52.20, Y-score:93.34



# Unknown set no. 487, Gzrgtko gpv<J wo cp'Rtuo c'gzra3

EEQFNSTFR(=PEP)\_6\_3\_1\_1, m/z:1059.42(3+), RT:60.74, Y-score:88.95

HCD Scan:16805



CID Scan:16809



Unknown set no. 488, Gzrgtko gpvJ wo cp'Rcuo c'gzra6

EEQFNSTFR(=PEP)\_6\_3\_1\_1, m/z:1059.42(3+), RT:60.94, Y-score:82.98

HCD Scan:17192



CID Scan:17195



Unknown set no. 489, Gzrgtko gpvJ wo cp'Rcuo c'gzra5

EEQFNSTFR(=PEP)\_6\_3\_1\_1, m/z:1059.42(3+), RT:60.90, Y-score:91.06

HCD Scan:16889



CID Scan:16894



# Unknown set no. 490, Gzrgtko gpv<J wo cp'Rrcuo c'gzra3

EEQYNSTFR(=PEP)\_3\_4\_1\_0, m/z:1309.53(2+), RT:41.08, Y-score:87.51

HCD Scan:10125



CID Scan:10127



# Unknown set no. 491, Gzrgtko gvwJ wo cp'Rcuo c'gzra5

EEQYNSTFR(=PEP)\_3\_4\_1\_0, m/z:1309.53(2+), RT:40.48, Y-score:92.72

HCD Scan:9904



CID Scan:9906





Unknown set no. 492, Gzrgtko gvwJ wo cp'Rcuo c'gzra6

EEQYNSTFR(=PEP)\_3\_4\_1\_0, m/z:1309.53(2+), RT:40.58, Y-score:89.68

HCD Scan:10028



CID Scan:10030



# Unknown set no. 493, Gzrgtko gpv<J wo cp'Rruo c'gzra5

EEQYNSTFR(=PEP)\_3\_4\_1\_0, m/z:1309.53(2+), RT:41.72, Y-score:87.71

HCD Scan:10289



CID Scan:10292



Unknown set no. 494, Gzrgtko gpv<J wo cp'Rruo c'gzra3

EEQYNSTFR(=PEP)\_4\_3\_1\_0, m/z:1289.02(2+), RT:39.25, Y-score:95.83



# Unknown set no. 495, Gzrgtko gpvJ wo cp'Rcuo c'gzra5

EEQYNSTFR(=PEP)\_4\_3\_1\_0, m/z:1289.02(2+), RT:39.39, Y-score:96.90



Unknown set no. 496, Gzrgtko gpv<J wo cp'Rxcuo c'gzra5

EEQYNSTFR(=PEP)\_4\_3\_1\_0, m/z:1289.02(2+), RT:39.82, Y-score:94.47



# Unknown set no. 497, Gzrgtko gpv'J wo cp'Rruo c'gzra3

EEQYNSTFR(=PEP)\_5\_4\_1\_0, m/z:1472.08(2+), RT:39.11, Y-score:96.10



Unknown set no. 498, Gzrgtko gpvJ wo cp'Rtuo c'gzra4

EEQYNSTFR(=PEP)\_5\_4\_1\_0, m/z:1471.58(2+), RT:39.78, Y-score:96.79



# Unknown set no. 499, Gzrgtko gpv<J wo cp'Rcuo c'gzra5

EEQYNSTFR(=PEP)\_5\_4\_1\_0, m/z:1471.58(2+), RT:39.02, Y-score:81.42

HCD Scan:9487



CID Scan:9490





# Unknown set no. 500, Gzrgtko gvw'J wo cp'Rucuo c'gzra5

EEQYNSTFR(=PEP)\_5\_4\_1\_0, m/z:1471.58(2+), RT:39.62, Y-score:86.35



# Unknown set no. 501, Gzrgtko gpv'J wo cp'Ræuo c'gzra3

EEQYNSTFR(=PEP)\_5\_4\_1\_1, m/z:1617.13(2+), RT:50.60, Y-score:100.00



# Unknown set no. 502, Gzrgtko gpv<J wo cp'Rrcuo c'gzra4

EEQYNSTFR(=PEP)\_5\_4\_1\_1, m/z:809.07(4+), RT:50.42, Y-score:83.91



Unknown set no. 503, Gzrgtko gpv<J wo cp'Rncuo c'gzra4

EEQYNSTFR(=PEP)\_5\_4\_1\_1, m/z:1617.13(2+), RT:50.14, Y-score:91.23



Unknown set no. 504, Gzrgtko gpv<J wo cp'Rxcuo c'gzra5

EEQYNSTFR(=PEP)\_5\_4\_1\_1, m/z:809.07(4+), RT:50.57, Y-score:83.59



Unknown set no. 505, Gzrgtko gpvJ wo cp'Rxcuo c'gzra6

EEQYNSTFR(=PEP)\_5\_4\_1\_1, m/z:809.07(4+), RT:50.57, Y-score:90.03



Unknown set no. 506, Gzrgtko gpwJ wo cp'Rxcuo c'gzra5

EEQYNSTFR(=PEP)\_5\_4\_1\_1, m/z:809.07(4+), RT:50.68, Y-score:90.68

HCD Scan:12939



CID Scan:12944



# Unknown set no. 507, Gzrgtko gpv<J wo cp'Rrcuo c'gzra6

EEQYNSTFR(=PEP)\_5\_4\_1\_2, m/z:1175.46(3+), RT:60.24, Y-score:85.08





Unknown set no. 508, Gzrgtko gpvJ wo cp'Ræuo c'gzra5

EEQYNSTFR(=PEP)\_5\_4\_1\_2, m/z:1175.46(3+), RT:60.20, Y-score:84.62

HCD Scan:16632



CID Scan:16636



Unknown set no. 509, Gzrgtko gpv'J wo cp'Rxcu c'gza3

EEQFNSTYR(=PEP)\_3\_3\_1\_0, m/z:1207.99(2+), RT:39.94, Y-score:93.86



Unknown set no. 510, Gzr gtko gpvJ wo cp'Rtuo c'gzra4

EEQFNSTYR(=PEP)\_3\_3\_1\_0, m/z:1207.99(2+), RT:40.13, Y-score:91.86



# Unknown set no. 511, Gzr gtko gpvJ wo cp'Rrcuo c'g'zra5

EEQFNSTYR(=PEP)\_3\_3\_1\_0, m/z:1207.99(2+), RT:40.55, Y-score:90.63



Unknown set no. 512, Gzrgtko gpvJ wo cp'Rncuo c'gzra6

EEQFNSTYR(=PEP)\_3\_3\_1\_0, m/z:1207.99(2+), RT:40.41, Y-score:93.80



Unknown set no. 513, Gzrgtko gpv<J wo cp'Rrcuo c'gzra5

EEQFNSTYR(=PEP)\_3\_3\_1\_0, m/z:1207.99(2+), RT:40.53, Y-score:92.86



Unknown set no. 514, Gzrgtko gvwJ wo cp'Rcuo c'gzra3

EEQFNSTYR(=PEP)\_3\_4\_1\_0, m/z:1309.53(2+), RT:40.05, Y-score:91.14

HCD Scan:9786



CID Scan:9787



Unknown set no. 515, Gzrgtko gpvJ wo cp'Rcuo c'gzra4

EEQFNSTYR(=PEP)\_3\_4\_1\_0, m/z:1309.53(2+), RT:40.26, Y-score:91.00

HCD Scan:9979



CID Scan:9981





# Unknown set no. 516, Gzr gtko gpvJ wo cp'Rxcuo c'gzra5

EEQFNSTYR(=PEP)\_3\_4\_1\_0, m/z:1309.53(2+), RT:41.00, Y-score:91.26

HCD Scan:10067



CID Scan:10070



# Unknown set no. 517, Gzrgtko gpv<J wo cp'Rncuo c'gzra6

EEQFNSTYR(=PEP)\_3\_4\_1\_0, m/z:1309.53(2+), RT:41.10, Y-score:90.75

HCD Scan:10208



CID Scan:10210



# Unknown set no. 518, Gzrgtko gpv<J wo cp'Rncuo c'gzra5

EEQFNSTYR(=PEP)\_3\_4\_1\_0, m/z:1309.53(2+), RT:41.19, Y-score:91.40

HCD Scan:10105



CID Scan:10108



Unknown set no. 519, Gzrgtko gpv<J wo cp'Rxcuo c'gzra3

EEQFNSTYR(=PEP)\_3\_5\_1\_0, m/z:1411.07(2+), RT:42.18, Y-score:90.37

HCD Scan:10483



CID Scan:10485



Unknown set no. 520, Gzrgtko gpvJ wo cp'Rcuo c'gzra4

EEQFNSTYR(=PEP)\_3\_5\_1\_0, m/z:1411.07(2+), RT:42.22, Y-score:89.84

HCD Scan:10656



CID Scan:10657



# Unknown set no. 521, Gzrgtko gpv<J wo cp'Rrcuo c'gzra5

EEQFNSTYR(=PEP)\_3\_5\_1\_0, m/z:1411.07(2+), RT:42.12, Y-score:89.23

HCD Scan:10463



CID Scan:10465



Unknown set no. 522, Gzrgtko gpv<J wo cp'Rncuo c'gzra6

EEQFNSTYR(=PEP)\_3\_5\_1\_0, m/z:1411.07(2+), RT:42.50, Y-score:82.79

HCD Scan:10743



CID Scan:10746



# Unknown set no. 523, Gzrgtko gpv<J wo cp'Rncuo c'gzra5

EEQFNSTYR(=PEP)\_3\_5\_1\_0, m/z:1411.07(2+), RT:42.63, Y-score:80.68

HCD Scan:10600



CID Scan:10601





# Unknown set no. 524, Gzrgtko gpvJ wo cp'Rrcuo c'gzra4

EEQFNSTYR(=PEP)\_4\_3\_1\_0, m/z:1289.02(2+), RT:39.43, Y-score:94.75



Unknown set no. 525, Gzrgtko gvwJ wo cp'Rcuo c'gzra5

EEQFNSTYR(=PEP)\_4\_3\_1\_0, m/z:1289.02(2+), RT:39.92, Y-score:94.12



# Unknown set no. 526, Gzrgtko gpv'J wo cp'Rncuo c'gzra6

EEQFNSTYR(=PEP)\_4\_3\_1\_0, m/z:1289.02(2+), RT:40.25, Y-score:89.59



# Unknown set no. 527, Gzrgtko gpvJ wo cp'Rcuo c'gza3

EEQFNSTYR(=PEP)\_4\_4\_1\_0, m/z:927.38(3+), RT:40.22, Y-score:97.77



Unknown set no. 528, Gzrgtko gvwJ wo cp'Rxcuo c'gzra4

EEQFNSTYR(=PEP)\_4\_4\_1\_0, m/z:927.38(3+), RT:40.41, Y-score:98.54



Unknown set no. 529, Gzrgtko gpvJ wo cp'Rcuo c'gzra4

EEQFNSTYR(=PEP)\_4\_4\_1\_0, m/z:1390.56(2+), RT:41.01, Y-score:97.63



# Unknown set no. 530, Gzrgtko gvwJ wo cp'Rucuo c'gzra5

EEQFNSTYR(=PEP)\_4\_4\_1\_0, m/z:927.38(3+), RT:40.83, Y-score:98.59



# Unknown set no. 531, Gzrgtko gvwJ wo cp'Rccuo c'gzra5

EEQFNSTYR(=PEP)\_4\_4\_1\_0, m/z:1390.56(2+), RT:40.89, Y-score:94.76





# Unknown set no. 532, Gzrgtko gpv'J wo cp'Ræu c'gzra3

EEQFNSTYR(=PEP)\_4\_4\_1\_1, m/z:1024.41(3+), RT:50.65, Y-score:82.43



Unknown set no. 533, Gzrgtko gvw'J wo cp'Rucuo c'gzra3

EEQFNSTYR(=PEP)\_4\_4\_1\_1, m/z:1536.11(2+), RT:50.77, Y-score:81.23



# Unknown set no. 534, Gzrgtko gpvJ wo cp'Rxcuo c'gzra4

EEQFNSTYR(=PEP)\_4\_4\_1\_1, m/z:1024.41(3+), RT:50.70, Y-score:81.60



Unknown set no. 535, Gzr gtlb gpvJ wo cp'Rtuo c'gzra5

EEQFNSTYR(=PEP)\_4\_4\_1\_1, m/z:1024.41(3+), RT:50.95, Y-score:83.07



# Unknown set no. 536, Gzrgtko gpv'J wo cp'Rucuo c'gzra6

EEQFNSTYR(=PEP)\_4\_4\_1\_1, m/z:1024.41(3+), RT:50.91, Y-score:84.79



# Unknown set no. 537, Gzrgtko gpv'J wo cp'Rtuo c'gzra5

EEQFNSTYR(=PEP)\_4\_4\_1\_1, m/z:1024.41(3+), RT:51.02, Y-score:85.05



# Unknown set no. 538, Gzrgtko gpv<J wo cp'Rruo c'gzra4

EEQFNSTYR(=PEP)\_4\_5\_1\_0, m/z:1492.10(2+), RT:41.90, Y-score:100.00

HCD Scan:10539



CID Scan:10542



Unknown set no. 539, Gzrgtko gpvJ wo cp'Rtuo c'gzra5

EEQFNSTYR(=PEP)\_5\_4\_1\_0, m/z:1472.08(2+), RT:39.54, Y-score:91.22





# Unknown set no. 540, Gzrgtko gpv'J wo cp'Rruo c'gzra4

GLTFQQNASSMCVDPQDPAIR(=PEP)\_5\_4\_1\_1, m/z:1100.46(4+), RT:88.15, Y-score:87.12



# Unknown set no. 541, Gzrgtko gpv<J wo cp'Rruo c'gzra3

NNSDISSTR(=PEP)\_4\_3\_0\_1, m/z:848.01(3+), RT:16.07, Y-score:95.18

HCD Scan:2770



CID Scan:2772



# Unknown set no. 542, Gzrgtko gpv<J wo cp'Rruo c'gzra4

NNSDISSTR(=PEP)\_4\_3\_0\_1, m/z:848.01(3+), RT:16.48, Y-score:87.03

HCD Scan:2938



CID Scan:2942



# Unknown set no. 543, Gzrgtko gpv'J wo cp'Rncuo c'gzra5

NNSDISSTR(=PEP)\_4\_3\_0\_1, m/z:848.01(3+), RT:16.54, Y-score:83.00



Unknown set no. 544, Gzrgtko gpv<J wo cp'Rcuo c'gzra6

NNSDISSTR(=PEP)\_4\_3\_0\_1, m/z:848.01(3+), RT:16.57, Y-score:85.63

CID Scan:2927



CID Scan:2928



Unknown set no. 545, Gzr gtlk gpvJ wo cp'Rrcuo c'gzra5

NNSDISSTR(=PEP)\_4\_3\_0\_1, m/z:848.01(3+), RT:16.48, Y-score:82.68

HCD Scan:2832



CID Scan:2834



Unknown set no. 546, Gzrgtko gpv<J wo cp'Rrcuo c'gzra3

NNSDISSTR(=PEP)\_4\_3\_1\_1, m/z:896.69(3+), RT:16.72, Y-score:77.63

HCD Scan:2997



CID Scan:3001



Unknown set no. 547, Gzrgtk gpv<J wo cp'Rrcuo c'gzra3

NNSDISSTR(=PEP)\_5\_3\_0\_1, m/z:902.03(3+), RT:15.81, Y-score:90.09

HCD Scan:2676



CID Scan:2681





# Unknown set no. 548, Gzrgtko gvw'J wo cp'Rruo c'gzra4

NNSDISSTR(=PEP)\_5\_3\_0\_1, m/z:902.03(3+), RT:16.22, Y-score:87.43

HCD Scan:2829



CID Scan:2834



# Unknown set no. 549, Gzrgtko gpwJ wo cp'Rxcuo c'gzra5

NNSDISSTR(=PEP)\_5\_3\_0\_1, m/z:902.03(3+), RT:16.30, Y-score:89.77

HCD Scan:2741



CID Scan:2746



# Unknown set no. 550, Gzrgtko gpv'J wo cp'Rucuo c'gzra6

NNSDISSTR(=PEP)\_5\_3\_0\_1, m/z:902.03(3+), RT:16.33, Y-score:87.19

HCD Scan:2833



CID Scan:2838



# Unknown set no. 551, Gzrgtko gpv<J wo cp'Ræuo c'gzra5

NNSDISSTR(=PEP)\_5\_3\_0\_1, m/z:902.03(3+), RT:16.26, Y-score:87.98

HCD Scan:2745



CID Scan:2750



Unknown set no. 552, Gzrgtko gpw<J wo cp'Rruo c'gzra6

NNSDISSTR(=PEP)\_5\_3\_1\_1, m/z:950.71(3+), RT:16.95, Y-score:78.05



Unknown set no. 553, Gzrgtko gvwJ wo cp'Rtuo c'gzra4

NNSDISSTR(=PEP)\_5\_4\_0\_1, m/z:969.72(3+), RT:16.64, Y-score:92.07



# Unknown set no. 554, Gzr gtlk gpvJ wo cp'Rrcuo c'gza4

NNSDISSTR(=PEP)\_5\_4\_1\_1, m/z:1018.40(3+), RT:17.08, Y-score:89.47



# Unknown set no. 555, Gzrgtko gpv<J wo cp'Rtuo c'gzra4

NNSDISSTR(=PEP)\_5\_4\_1\_1, m/z:1527.10(2+), RT:17.15, Y-score:84.12





# Unknown set no. 556, Gzrgtko gpv<J wo cp'Rrcuo c'gzra5

NNSDISSTR(=PEP)\_5\_4\_1\_2, m/z:1115.43(3+), RT:26.27, Y-score:85.75



# Unknown set no. 557, Gzrgtko gpv'J wo cp'Rncuo c'gzra6

NNSDISSTR(=PEP)\_5\_5\_0\_1, m/z:1037.41(3+), RT:17.72, Y-score:86.38



# Unknown set no. 558, Gzrgtko gvwJ wo cp'Rucuo c'gzra5

NNSDISSTR(=PEP)\_5\_5\_1\_1, m/z:1086.10(3+), RT:18.54, Y-score:90.75



# Unknown set no. 559, Gzrgtko gpv<J wo cp'Rrcuo c'gzra3

NNSDISSTR(=PEP)\_6\_3\_0\_1, m/z:956.04(3+), RT:15.57, Y-score:85.79

HCD Scan:2567



CID Scan:2571



# Unknown set no. 560, Gzrgtko gpv<J wo cp'Rncuo c'gzra4

NNSDISSTR(=PEP)\_6\_3\_0\_1, m/z:956.04(3+), RT:16.10, Y-score:85.45

HCD Scan:2772



CID Scan:2777



# Unknown set no. 561, Gzrgtko gpv<J wo cp'Rncuo c'gzra5

NNSDISSTR(=PEP)\_6\_3\_1\_1, m/z:1004.73(3+), RT:17.01, Y-score:86.24



# Unknown set no. 562, Gzr gtko gpvJ wo cp'Rcuo c'gzra6

NNSDISSTR(=PEP)\_6\_3\_1\_1, m/z:1004.73(3+), RT:17.09, Y-score:90.87

### HCD Scan:3112



### CID Scan:3113



# Unknown set no. 563, Gzrgtko gpv<J wo cp'Ræuo c'gzra3

ENISDPTSPLR(=PEP)\_5\_3\_1\_1, m/z:1029.10(3+), RT:66.38, Y-score:95.83

HCD Scan:19130



CID Scan:19134





Unknown set no. 564, Gzrgtko gpwJ wo cp'Rcuo c'gzra5

ENISDPTSPLR(=PEP)\_5\_3\_1\_1, m/z:1029.10(3+), RT:66.22, Y-score:95.11

HCD Scan:18905



CID Scan:18908



Unknown set no. 565, Gzrgtko gpwJ wo cp'Rcuo c'gzra6

ENISDPTSPLR(=PEP)\_5\_3\_1\_1, m/z:1029.10(3+), RT:66.61, Y-score:93.46

HCD Scan:19584



CID Scan:19585



# Unknown set no. 566, Gzrgtko gpv<J wo cp'Ræuo c'gzra5

ENISDPTSPLR(=PEP)\_5\_3\_1\_1, m/z:1029.10(3+), RT:66.30, Y-score:94.83

### HCD Scan:19133



### CID Scan:19137



Unknown set no. 567, Gzrgtko gpvJ wo cp'Rcuo c'gzra4

ENISDPTSPLR(=PEP)\_5\_4\_0\_1, m/z:1048.10(3+), RT:65.58, Y-score:95.35



# Unknown set no. 568, Gzrgtk gpv<J wo cp'Rruo c'gzra3

ENISDPTSPLR(=PEP)\_5\_4\_0\_2, m/z:859.11(4+), RT:75.40, Y-score:97.65

HCD Scan:22459



CID Scan:22460



# Unknown set no. 569, Gzrgtk gpv<J wo cp'Rruo c'gzra3

ENISDPTSPLR(=PEP)\_5\_4\_0\_2, m/z:1717.20(2+), RT:75.34, Y-score:82.74



Unknown set no. 570, Gzrgtko gpvJ wo cp'Rcuo c'gzra4

ENISDPTSPLR(=PEP)\_5\_4\_0\_2, m/z:859.11(4+), RT:75.75, Y-score:86.76



# Unknown set no. 571, Gzrgtko gpv<J wo cp'Rruo c'gzra4

ENISDPTSPLR(=PEP)\_5\_4\_0\_2, m/z:1145.14(3+), RT:75.35, Y-score:97.56

HCD Scan:22781



CID Scan:22784





# Unknown set no. 572, Gzrgtko gpvJ wo cp'Rtuo c'gzra5

ENISDPTSPLR(=PEP)\_5\_4\_0\_2, m/z:859.11(4+), RT:75.62, Y-score:90.45



# Unknown set no. 573, Gzrgtko gpv'J wo cp'Rtuo c'gzra6

ENISDPTSPLR(=PEP)\_5\_4\_0\_2, m/z:859.11(4+), RT:75.67, Y-score:91.40



Unknown set no. 574, Gzrgtko gpwJ wo cp'Rcuo c'gzra4

GLCVNASAVSR(=PEP)\_5\_4\_0\_2, m/z:1113.45(3+), RT:57.05, Y-score:89.31



# Unknown set no. 575, Gzrgtko gpv'J wo cp'Rtuo c'gzra5

GLCVNASAVSR(=PEP)\_5\_4\_0\_2, m/z:1113.45(3+), RT:57.16, Y-score:91.98



Unknown set no. 576, Gzrgtko gpvJ wo cp'Rxcuo c'gzra4

NNSLR(=PEP)\_4\_3\_0\_1, m/z:1076.44(2+), RT:18.09, Y-score:93.19



# Unknown set no. 577, Gzr gtlp gpvJ wo cp'Rtuo c'gzra3

NNSLR(=PEP)\_5\_4\_0\_2, m/z:936.71(3+), RT:17.77, Y-score:91.70

HCD Scan:3341



CID Scan:3342



# Unknown set no. 578, Gzr gtko gpv J wo cp'Rcuo c'gzra4

NNSLR(=PEP)\_5\_4\_0\_2, m/z:936.71(3+), RT:17.90, Y-score:91.04



Unknown set no. 579, Gzrgtko gpwJ wo cp'Rtuo c'gzra5

NNSLR(=PEP)\_5\_4\_0\_2, m/z:936.71(3+), RT:18.03, Y-score:94.17





# Unknown set no. 580, Gzrgtko gvw'J wo cp'Rcuo c'gzra4

NNSLR(=PEP)\_5\_4\_0\_2, m/z:936.71(3+), RT:18.63, Y-score:91.19

### HCD Scan:3659



### CID Scan:3663



Unknown set no. 581, Gzr gtko gpvJ wo cp'Rcuo c'gzra5

NNSLR(=PEP)\_5\_4\_0\_2, m/z:936.71(3+), RT:18.09, Y-score:91.21

HCD Scan:3366



CID Scan:3367



# Unknown set no. 582, Gzrgtko gpv<J wo cp'Rruo c'gzra4

ENLTAR(=PEP)\_5\_4\_0\_2, m/z:970.05(3+), RT:36.68, Y-score:95.03

HCD Scan:8785



CID Scan:8788



# Unknown set no. 583, Gzrgtko gpv'J wo cp'Rncuo c'gzra3

ENLTAR(=PEP)\_6\_5\_0\_3, m/z:1188.80(3+), RT:52.10, Y-score:90.32

HCD Scan:13579



CID Scan:13583



# Unknown set no. 584, Gzrgtko gpv'J wo cp'Rcuo c'gzra5

ENLTAR(=PEP)\_6\_5\_0\_3, m/z:1188.80(3+), RT:52.43, Y-score:90.24



# Unknown set no. 585, Gzrgtko gvwJ wo cp'Rcuo c'gzra4

ENLTAR(=PEP)\_6\_5\_0\_3, m/z:1188.80(3+), RT:52.50, Y-score:92.53

HCD Scan:13943



CID Scan:13946



# Unknown set no. 586, Gzrgtk gpv<J wo cp'Rrcuo c'gzra3

ITYSIVQTNCSK(=PEP)\_5\_4\_0\_2, m/z:905.38(4+), RT:75.97, Y-score:88.06

HCD Scan:22573



CID Scan:22574



# Unknown set no. 587, Gzrgtko gpvJ wo cp'Rcuo c'gzra4

ITYSIVQTNCSK(=PEP)\_5\_4\_0\_2, m/z:905.38(4+), RT:75.96, Y-score:86.37





Unknown set no. 588, Gzrgtko gpv<J wo cp'Rcuo c'gzra5

ITYSIVQTNCSK(=PEP)\_5\_4\_0\_2, m/z:905.38(4+), RT:76.13, Y-score:94.49



# Unknown set no. 589, Gzrgtko gvwJ wo cp'Rrcuo c'gzra6

ITYSIVQTNCSK(=PEP)\_5\_4\_0\_2, m/z:905.38(4+), RT:76.23, Y-score:84.19



# Unknown set no. 590, Gzrgtko gpv<J wo cp'Rncuo c'gzra5

ITYSIVQTNCSK(=PEP)\_5\_4\_0\_2, m/z:905.38(4+), RT:75.91, Y-score:83.82



# Unknown set no. 591, Gzrgtko gpv<J wo cp'Ræuo c'gzra3

ITYSIVQTNSCK(=PEP)\_5\_4\_1\_2, m/z:1255.52(3+), RT:75.43, Y-score:87.92

HCD Scan:22470



CID Scan:22471





# Unknown set no. 593, Gzrgtko gpv<J wo cp'Rcuo c'gzra6

ITYSIVQTNSCK(=PEP)\_6\_5\_1\_3, m/z:1105.95(4+), RT:87.09, Y-score:78.42

HCD Scan:26126



CID Scan:26128



# Unknown set no. 594, Gzrgtko gpv<J wo cp'Rrcuo c'gzra5

ITYSIVQTNSCK(=PEP)\_6\_5\_1\_3, m/z:1105.95(4+), RT:86.74, Y-score:79.85

HCD Scan:25353



CID Scan:25355



Unknown set no. 595, Gzrgtko gpv<J wo cp'Ræuo c'gzra5

LNAENNATFYFK(=PEP)\_5\_4\_0\_2, m/z:909.87(4+), RT:91.27, Y-score:82.70

HCD Scan:26585



CID Scan:26586





Unknown set no. 596, Gzrgtko gpv<J wo cp'Ræuo c'gzra5

LNAENNATFYFK(=PEP)\_6\_5\_1\_3, m/z:1110.44(4+), RT:103.47, Y-score:81.39

HCD Scan:29338



CID Scan:29339



Unknown set no. 597, Gzr gtko gpv<J wo cp'Rtuo c'gzra4

YNSQNSNNQFVLYR(=PEP)\_5\_4\_0\_2, m/z:1020.67(4+), RT:86.26, Y-score:89.58

HCD Scan:25874



CID Scan:25878



# Unknown set no. 598, Gzrgtko gpvJ wo cp'Rcuo c'gzra6

YNSQNSNNQFVLYR(=PEP)\_5\_4\_0\_2, m/z:1020.67(4+), RT:86.42, Y-score:84.75

CID Scan:25848



CID Scan:25851



# Unknown set no. 599, Gzrgtko gpvJ wo cp'Rcuo c'gzra5

YNSQNSNNQFVLYR(=PEP)\_5\_4\_0\_2, m/z:1020.67(4+), RT:86.27, Y-score:87.28

HCD Scan:25161



CID Scan:25165



# Unknown set no. 600, Gzrgtko gpvJ wo cp'Rcuo c'gzra4

DNYTDLVAIQNK(=PEP)\_5\_4\_0\_2, m/z:1200.15(3+), RT:86.38, Y-score:92.36

HCD Scan:25832



CID Scan:25837



# Unknown set no. 601, Gzrgtko gpvJ wo cp'Rcuo c'gzra3

VVYNR(=PEP)\_6\_5\_0\_3, m/z:1171.13(3+), RT:49.93, Y-score:82.32



# Unknown set no. 602, Gzrgtko gpvJ wo cp'Rtuo c'gzra4

VVYNR(=PEP)\_6\_5\_0\_3, m/z:1171.13(3+), RT:49.92, Y-score:81.24

HCD Scan:12910



CID Scan:12915



# Unknown set no. 603, Gzrgtko gpv'J wo cp'Rncuo c'gzra6

VVYNR(=PEP)\_6\_5\_0\_3, m/z:1171.13(3+), RT:50.15, Y-score:77.31





Unknown set no. 604, Gzrgtko gpvJ wo cp'Rcuo c'gzra5

VVYNR(=PEP)\_6\_5\_0\_3, m/z:1171.13(3+), RT:50.27, Y-score:79.75



# Unknown set no. 605, Gzrgtko gv<J wo cp'Rcuo c'gzra3

NWSLPNR(=PEP)\_5\_4\_1\_2, m/z:1079.77(3+), RT:79.06, Y-score:82.06



# Unknown set no. 606, Gzrgtko gpv<J wo cp'Rrcuo c'gzra5

NWSLPNR(=PEP)\_5\_4\_1\_2, m/z:1079.77(3+), RT:79.02, Y-score:88.57

CID Scan:23321



CID Scan:23324



# Unknown set no. 607, Gzrgtko gpv<J wo cp'Rncuo c'gzra4

GVNFNVSK(=PEP)\_5\_4\_0\_2, m/z:1535.12(2+), RT:68.09, Y-score:83.71

HCD Scan:20180



CID Scan:20184



# Unknown set no. 608, Gzrgtko gvw<J wo cp'Rruo c'gzra5

GVNFVSK(=PEP)\_5\_4\_0\_2, m/z:1023.75(3+), RT:67.94, Y-score:83.46



# Unknown set no. 609, Gzrgtko gvw'J wo cp'Rucuo c'gzra3

NLSCR(=PEP)\_5\_4\_0\_2, m/z:952.03(3+), RT:22.84, Y-score:82.37



# Unknown set no. 610, Gzrgtko gpv'J wo cp'Rncuo c'gzra4

NLSCR(=PEP)\_5\_4\_0\_2, m/z:952.04(3+), RT:23.00, Y-score:79.39



# Unknown set no. 611, Gzr gtlb gpv<J wo cp'Rtuo c'gzra4

NLSCR(=PEP)\_5\_4\_0\_2, m/z:952.03(3+), RT:23.33, Y-score:83.03





# Unknown set no. 612, Gzrgtko gvw'J wo cp'Rucuo c'gzra5

NLSCR(=PEP)\_5\_4\_0\_2, m/z:952.03(3+), RT:23.23, Y-score:81.71



# Unknown set no. 613, Gzrgtko gpv<J wo cp'Rrcuo c'gzra5

GHVNITR(=PEP)\_4\_3\_0\_1, m/z:1173.00(2+), RT:24.46, Y-score:89.14



# Unknown set no. 614, Gzrgtko gpv<J wo cp'Rncuo c'gzra6

GHVNITR(=PEP)\_4\_3\_0\_1, m/z:1173.00(2+), RT:24.64, Y-score:91.67



# Unknown set no. 615, Gzrgtk gpv<J wo cp'Rruo c'gzra5

GHVNITR(=PEP)\_4\_3\_0\_1, m/z:1173.00(2+), RT:24.48, Y-score:89.77

CID Scan:5218



CID Scan:5223



# Unknown set no. 616, Gzrgtko gpv<J wo cp'Rncuo c'gzra3

GHVNITR(=PEP)\_5\_4\_1\_2, m/z:1049.76(3+), RT:24.43, Y-score:86.94



# Unknown set no. 617, Gzrgtko gpvJ wo cp'Rcuo c'gzra6

GHVNITR(=PEP)\_5\_4\_1\_2, m/z:1049.76(3+), RT:24.82, Y-score:92.24



Unknown set no. 618, Gzrgtko gpv<J wo cp'Ræuo c'gzra4

NFTENDLLVR(=PEP)\_5\_4\_0\_2, m/z:857.11(4+), RT:93.51, Y-score:90.24

HCD Scan:27843



CID Scan:27844



# Unknown set no. 619, Gzrgtko gpv<J wo cp'Rcuo c'gzra4

NFTENDLLVR(=PEP)\_5\_4\_0\_2, m/z:1142.47(3+), RT:93.36, Y-score:81.25





Unknown set no. 620, Gzrgtko gpvJ wo cp'Rcuo c'gzra5

NFTENDLLVR(=PEP)\_5\_4\_0\_2, m/z:857.11(4+), RT:93.58, Y-score:98.69

HCD Scan:27241



CID Scan:27242



# Unknown set no. 621, Gzrgtko gpv<J wo cp'Rtuo c'gzra5

NFTENDLLVR(=PEP)\_5\_4\_0\_2, m/z:1142.47(3+), RT:93.48, Y-score:92.21

HCD Scan:27227



CID Scan:27228



# Unknown set no. 622, Gzrgtko gpvJ wo cp'Rcuo c'gzra6

NFTENDLLVR(=PEP)\_5\_4\_0\_2, m/z:857.11(4+), RT:93.73, Y-score:90.92

HCD Scan:27603



CID Scan:27606



Unknown set no. 623, Gzrgtko gpv<J wo cp'Rrcuo c'gzra3

CGLVPVLAENYNK(=PEP)\_4\_3\_0\_1, m/z:1009.10(3+), RT:99.63, Y-score:92.93

HCD Scan:28398



CID Scan:28401



Unknown set no. 624, Gzrgtko gpv<J wo cp'Rruo c'gzra4

CGLVPVLAENYNK(=PEP)\_4\_3\_0\_1, m/z:1009.11(3+), RT:99.82, Y-score:90.81



# Unknown set no. 625, Gzrgtko gpv<J wo cp'Rcuo c'gzra5

CGLVPVLAENYNK(=PEP)\_4\_3\_0\_1, m/z:1009.11(3+), RT:99.87, Y-score:88.39



Unknown set no. 626, Gzrgtko gpv'J wo cp'Rncuo c'gzra6

CGLVPVLAENYNK(=PEP)\_4\_3\_0\_1, m/z:1009.11(3+), RT:99.95, Y-score:88.64



Unknown set no. 627, Gzrgtko gpv<J wo cp'Rncuo c'gzra5

CGLVPVLAENYNK(=PEP)\_4\_3\_0\_1, m/z:1009.11(3+), RT:99.67, Y-score:89.31

HCD Scan:28080



CID Scan:28083





Unknown set no. 628, Gzrgtko gpvJ wo cp'Rncuo c'gzra6

CGLVPVLAENYNK(=PEP)\_5\_4\_0\_1, m/z:848.37(4+), RT:88.17, Y-score:92.27

HCD Scan:26450



CID Scan:26451



Unknown set no. 629, Gzrgtko gpv<J wo cp'Rruo c'gzra3

CGLVPVLAENYNK(=PEP)\_5\_4\_0\_2, m/z:921.14(4+), RT:99.49, Y-score:91.32



# Unknown set no. 630, Gzrgtko gpv<J wo cp'Rrcuo c'gzra4

CGLVPVLAENYNK(=PEP)\_5\_4\_0\_2, m/z:921.14(4+), RT:100.75, Y-score:92.10



# Unknown set no. 631, Gzrgtko gpv<J wo cp'Ræuo c'gzra5

CGLVPVLAENYNK(=PEP)\_5\_4\_0\_2, m/z:921.14(4+), RT:99.69, Y-score:88.72

HCD Scan:28547



CID Scan:28548



# Unknown set no. 632, Gzrgtk gpv<J wo cp'Rcuo c'gzra6

CGLVPVLAENYNK(=PEP)\_5\_4\_0\_2, m/z:921.14(4+), RT:100.90, Y-score:91.57



Unknown set no. 633, Gzrgtko gvw'J wo cp'Rtuo c'gzra5

CGLVPVLAENYNK(=PEP)\_5\_4\_0\_2, m/z:921.14(4+), RT:99.96, Y-score:88.71



Unknown set no. 634, Gzr gtlk gpvJ wo cp'Rcuo c'gza5

LDVDQALNR(=PEP)\_5\_4\_0\_2, m/z:1083.45(3+), RT:78.91, Y-score:83.38

HCD Scan:23282



CID Scan:23286



Unknown set no. 635, Gzrgtko gpv<J wo cp'Rrcuo c'gzra4

VTACHSSQP NATLYK(=PEP)\_5\_4\_0\_2, m/z:1294.54(3+), RT:51.44, Y-score:76.39

HCD Scan:13508



CID Scan:13511





# Unknown set no. 636, Gzrgtko gpvJ wo cp'Rcuo c'gzra3

EVFVHPNYSK(=PEP)\_5\_4\_0\_2, m/z:856.86(4+), RT:61.43, Y-score:83.48

HCD Scan:17098



CID Scan:17101



Unknown set no. 637, Gzrgtko gpv<J wo cp'Rncuo c'gzra4

EVFVHPNYSK(=PEP)\_5\_4\_0\_2, m/z:856.85(4+), RT:61.57, Y-score:84.91



# Unknown set no. 638, Gzrgtko gpv<J wo cp'Rruo c'gzra3

NGSLFAFR(=PEP)\_4\_3\_0\_1, m/z:820.68(3+), RT:84.48, Y-score:94.31

CID Scan:24844



CID Scan:24845



Unknown set no. 639, Gzrgtk gpv<J wo cp'Riuo c'gzra4

NGSLFAFR(=PEP)\_4\_3\_0\_1, m/z:820.68(3+), RT:84.45, Y-score:89.95

HCD Scan:25335



CID Scan:25338



Unknown set no. 640, Gzrgtko gpv<J wo cp'Rrcuo c'gzra5

NGSLFAFR(=PEP)\_4\_3\_0\_1, m/z:820.68(3+), RT:84.55, Y-score:89.37

CID Scan:24824



CID Scan:24827



# Unknown set no. 641, Gzrgtko gpy'J wo cp'Rncuo c'gzra6

NGSLFAFR(=PEP)\_4\_3\_0\_1, m/z:820.68(3+), RT:84.64, Y-score:94.90



Unknown set no. 642, Gzrgtko gpvJ wo cp'Rcuo c'gzra5

NGSLFAFR(=PEP)\_4\_3\_0\_1, m/z:820.68(3+), RT:84.27, Y-score:97.96



# Unknown set no. 643, Gzrgtko gpv'J wo cp'Rruo c'gzra3

NGSLFAFR(=PEP)\_5\_3\_0\_1, m/z:874.70(3+), RT:83.68, Y-score:92.11

HCD Scan:24612



CID Scan:24613





Unknown set no. 644, Gzrgtko gpv<J wo cp'Rrcuo c'gzra4

NGSLFAFR(=PEP)\_5\_3\_0\_1, m/z:874.70(3+), RT:83.65, Y-score:94.72

CID Scan:25110



CID Scan:25113



Unknown set no. 645, Gzrgtko gpv<J wo cp'Rncuo c'gzra5

NGSLFAFR(=PEP)\_5\_3\_0\_1, m/z:874.70(3+), RT:83.79, Y-score:96.13

HCD Scan:24605



CID Scan:24606



# Unknown set no. 646, Gzrgtko gpy<J wo cp'Rncuo c'gzra6

NGSLFAFR(=PEP)\_5\_3\_0\_1, m/z:874.70(3+), RT:83.89, Y-score:96.23

HCD Scan:25093



CID Scan:25094



# Unknown set no. 647, Gzrgtko gpvJ wo cp'Rcuo c'gzra5

NGSLFAFR(=PEP)\_5\_3\_0\_1, m/z:874.70(3+), RT:83.62, Y-score:91.22

HCD Scan:24402



CID Scan:24407



# Unknown set no. 648, Gzrgtko gpv<J wo cp'Rruo c'gzra3

NGSLFAFR(=PEP)\_5\_4\_0\_1, m/z:942.39(3+), RT:82.93, Y-score:94.57

HCD Scan:24399



CID Scan:24402



# Unknown set no. 649, Gzrgtko gpv<J wo cp'Rrcuo c'gzra5

NGSLFAFR(=PEP)\_5\_4\_0\_1, m/z:942.39(3+), RT:83.20, Y-score:93.21



# Unknown set no. 650, Gzrgtko gpv'J wo cp'Rncuo c'gzra6

NGSLFAFR(=PEP)\_5\_4\_0\_1, m/z:942.39(3+), RT:83.71, Y-score:96.07



Unknown set no. 651, Gzrgtk gpv<J wo cp'Rrcuo c'gzra5

NGSLFAFR(=PEP)\_5\_4\_0\_1, m/z:942.39(3+), RT:82.79, Y-score:98.96





# Unknown set no. 652, Gzrgtko gpw<J wo cp'Rrcuo c'gzra3

NGSLFAFR(=PEP)\_5\_4\_0\_2, m/z:1039.42(3+), RT:97.39, Y-score:92.43

HCD Scan:27907



CID Scan:27909



# Unknown set no. 653, Gzrgtk gpv<J wo cp'Rrcuo c'gzra3

NGSLFAFR(=PEP)\_5\_4\_0\_2, m/z:1558.63(2+), RT:97.47, Y-score:91.95

CID Scan:27932



CID Scan:27933



# Unknown set no. 654, Gzrgtko gpv'J wo cp'Rncuo c'gzra4

NGSLFAFR(=PEP)\_5\_4\_0\_2, m/z:1039.42(3+), RT:97.52, Y-score:92.37

### HCD Scan:28612



### CID Scan:28613



# Unknown set no. 655, Gzrgtko gpvJ wo cp'Rcuo c'gzra5

NGSLFAFR(=PEP)\_5\_4\_0\_2, m/z:1039.42(3+), RT:97.33, Y-score:91.44

### HCD Scan:27589



### CID Scan:27590



# Unknown set no. 656, Gzrgtko gpv<J wo cp'Rrcuo c'gzra6

NGSLFAFR(=PEP)\_5\_4\_1\_2, m/z:1088.11(3+), RT:97.96, Y-score:87.27

HCD Scan:28460



CID Scan:28463



# Unknown set no. 657, Gzrgtko gpv<J wo cp'Ræuo c'gzra3

NGSLFAFR(=PEP)\_6\_3\_0\_1, m/z:928.72(3+), RT:83.09, Y-score:95.53

HCD Scan:24436



CID Scan:24437



Unknown set no. 658, Gzrgtko gpvJ wo cp'Rcuo c'gzra4

NGSLFAFR(=PEP)\_6\_3\_0\_1, m/z:928.72(3+), RT:83.15, Y-score:98.03

HCD Scan:24914



CID Scan:24915



Unknown set no. 659, Gzrgtko gpv<J wo cp'Ræuo c'gzra5

NGSLFAFR(=PEP)\_6\_3\_0\_1, m/z:928.72(3+), RT:83.24, Y-score:93.90

HCD Scan:24454



CID Scan:24459





Unknown set no. 660, Gzrgtk gpv<J wo cp'Rruo c'gzra6

NGSLFAFR(=PEP)\_6\_3\_0\_1, m/z:928.72(3+), RT:83.32, Y-score:93.66

HCD Scan:24928



CID Scan:24929



# Unknown set no. 661, Gzrgtko gpv<J wo cp'Rncuo c'gzra5

NGSLFAFR(=PEP)\_6\_3\_0\_1, m/z:928.72(3+), RT:82.98, Y-score:95.00

HCD Scan:24228



CID Scan:24229



# Unknown set no. 662, Gzrgtko gpvJ wo cp'Rcuo c'gzra4

NGSLFAFR(=PEP)\_6\_5\_1\_3, m/z:1306.85(3+), RT:111.89, Y-score:95.95

HCD Scan:31303



CID Scan:31304



# Unknown set no. 663, Gzrgtko gpwJ wo cp'Rcuo c'gzra5

NGSLFAFR(=PEP)\_6\_5\_1\_3, m/z:1306.85(3+), RT:112.16, Y-score:86.73

### HCD Scan:30797



### CID Scan:30798



# Unknown set no. 664, Gzrgtko gpv'J wo cp'Rncuo c'gzra6

NGSLFAFR(=PEP)\_6\_5\_1\_3, m/z:1306.85(3+), RT:112.11, Y-score:92.35

### HCD Scan:31067



### CID Scan:31068



Unknown set no. 665, Gzrgtko gpvJ wo cp'Rcuo c'gzra5

NNATVHEQVGGPSLTSDLQAQSK(=PEP)\_5\_4\_0\_2, m/z:918.00(5+), RT:72.48, Y-score:81.69

HCD Scan:21141



CID Scan:21145



Unknown set no. 666, Experiment: Human Plasma exp\_4

NNATVHEQVGPSLTSDLQAQSK(=PEP)\_5\_4\_0\_2, m/z:918.00(5+), RT:72.76, Y-score:80.70

HCD Scan:21733



CID Scan:21736



Unknown set no. 667, Gzrgtko gpv'J wo cp'Rcuo c'gzra3

FGCEIENNR(=PEP)\_5\_4\_0\_2, m/z:1115.10(3+), RT:58.62, Y-score:89.01





Unknown set no. 668, Gzr gtlk gpvJ wo cp'Rruo c'gzra4

FGCEIENNR(=PEP)\_5\_4\_0\_2, m/z:836.57(4+), RT:58.41, Y-score:93.89

HCD Scan:16223



CID Scan:16224



Unknown set no. 669, Gzr gtlb gpvJ wo cp'Rcuo c'gzra5

FGCEIENNR(=PEP)\_5\_4\_0\_2, m/z:836.57(4+), RT:58.43, Y-score:92.53

HCD Scan:15874



CID Scan:15877



Unknown set no. 670, Gzrgtko gpw'J wo cp'Rucw c'gzra4

FGCEIENNR(=PEP)\_5\_4\_0\_2, m/z:836.57(4+), RT:58.48, Y-score:91.19

HCD Scan:16241



CID Scan:16245



# Unknown set no. 671, Gzrgtko gpw'J wo cp'Rucuo c'gzra5

FGCEIENNR(=PEP)\_5\_4\_0\_2, m/z:836.57(4+), RT:58.50, Y-score:93.11

HCD Scan:15967



CID Scan:15970



Supplementary Figure 5. Model selection of (a) deep neural network and (b) support vector machine.
